# Supplementary material for: Krüppel-like Factor 5 Regulates Stemness, Lineage Specification, and Regeneration of Intestinal Epithelial Stem Cells
Source: PubMed Central journal article supplement — Cell Mol Gastroenterol Hepatol. 2019 Nov 25;9(4):587–609. doi: 10.1016/j.jcmgh.2019.11.009 (PMC7078555; doi:10.1016/j.jcmgh.2019.11.009), 2019-11-25
Supplement: mmc1.pdf [file mmc1.pdf]

Supplemental Table S1. Differentially expressed genes in Lgr5<sup>EGFP<sup>hi</sup></sup> cells between Lgr5<sup>Ctrl</sup> (CTRL) and Lgr5<sup>ΔKlf5</sup> (KO) mice

|                    | BaseMean    | FoldChange log2(KO/CTRL) | lfcSE       | stat         | pvalue      | padj        |
|--------------------|-------------|--------------------------|-------------|--------------|-------------|-------------|
| ENSMUSG00000093954 | 144.7680481 | -10.60229323             | 1.223905806 | -8.662670913 | 4.61E-18    | 3.18E-16    |
| ENSMUSG00000036242 | 101.9189156 | -8.233066968             | 1.070210396 | -7.69294243  | 1.44E-14    | 6.88E-13    |
| ENSMUSG00000097169 | 10.53707307 | -6.818102825             | 1.39033447  | -4.903929932 | 9.39E-07    | 1.42E-05    |
| ENSMUSG00000031385 | 10.24311212 | -6.779178728             | 1.385823925 | -4.891803791 | 9.99E-07    | 1.51E-05    |
| ENSMUSG00000105703 | 3877.542502 | -6.769218463             | 0.676807299 | -10.00169247 | 1.50E-23    | 1.55E-21    |
| ENSMUSG00000048153 | 9.458807896 | -6.660019496             | 1.484162206 | -4.487393271 | 7.21E-06    | 8.90E-05    |
| ENSMUSG00000072723 | 93.1889255  | -6.518650492             | 0.669252783 | -9.74019183  | 2.03E-22    | 2.01E-20    |
| ENSMUSG00000009588 | 177.1831369 | -6.32242814              | 0.91567127  | -6.904692054 | 5.03E-12    | 1.80E-10    |
| ENSMUSG00000074011 | 5.660121412 | -5.932007402             | 1.565932583 | -3.788162701 | 0.000151765 | 0.001312848 |
| ENSMUSG00000029618 | 5.235060201 | -5.804587749             | 1.673265168 | -3.469018456 | 0.000522364 | 0.00384463  |
| ENSMUSG00000029541 | 47.151848   | -5.79205552              | 0.741570035 | -7.810530699 | 5.69E-15    | 2.84E-13    |
| ENSMUSG00000111703 | 5.090816315 | -5.781238557             | 1.643915552 | -3.516749112 | 0.000436867 | 0.003309293 |
| ENSMUSG00000054360 | 9.976177731 | -5.758031169             | 1.386187545 | -4.153861567 | 3.27E-05    | 0.000341953 |
| ENSMUSG00000020405 | 4.537322949 | -5.608133428             | 1.60340621  | -3.497637337 | 0.000469399 | 0.003513953 |
| ENSMUSG00000105995 | 4.285993998 | -5.516488544             | 1.661465814 | -3.320254017 | 0.000899356 | 0.006099919 |
| ENSMUSG00000039883 | 4.016200973 | -5.439408578             | 1.716184972 | -3.169476873 | 0.001527136 | 0.009415721 |
| ENSMUSG00000115737 | 3.933667244 | -5.399866443             | 1.639399293 | -3.29380796  | 0.0009884   | 0.006585691 |
| ENSMUSG00000025014 | 3.857819101 | -5.367985516             | 1.70362176  | -3.150925658 | 0.001627539 | 0.009935875 |
| ENSMUSG00000113920 | 3.814803689 | -5.35377511              | 1.735044139 | -3.085670843 | 0.002030935 | 0.01192499  |
| ENSMUSG00000045232 | 6.811876195 | -5.194409491             | 1.445959115 | -3.59236263  | 0.000327693 | 0.00257683  |
| ENSMUSG00000046095 | 12.25737981 | -5.143171518             | 1.211747622 | -4.244424683 | 2.19E-05    | 0.00023991  |
| ENSMUSG00000094852 | 6.439450633 | -5.118242229             | 1.554136596 | -3.293302688 | 0.000990178 | 0.006593599 |
| ENSMUSG00000099491 | 10.50576851 | -4.930022731             | 1.26583233  | -3.894688589 | 9.83E-05    | 0.00090348  |
| ENSMUSG00000085719 | 10.276483   | -4.884152212             | 1.247700716 | -3.914522249 | 9.06E-05    | 0.000840308 |
| ENSMUSG00000086268 | 5.016873548 | -4.739739519             | 1.529692399 | -3.098491908 | 0.001945083 | 0.011521193 |
| ENSMUSG00000085403 | 4.984040816 | -4.724490355             | 1.558826651 | -3.030799065 | 0.002439075 | 0.013854766 |
| ENSMUSG00000070298 | 4.91104722  | -4.710856927             | 1.545226265 | -3.048651859 | 0.002298707 | 0.013195229 |

|                    |             |              |             |              |             |             |
|--------------------|-------------|--------------|-------------|--------------|-------------|-------------|
| ENSMUSG00000094092 | 4.524139186 | -4.597636139 | 1.606741295 | -2.861466343 | 0.004216863 | 0.021599036 |
| ENSMUSG00000099630 | 4.257459847 | -4.496992068 | 1.596381825 | -2.81699027  | 0.004847599 | 0.024228049 |
| ENSMUSG00000105206 | 7.763339694 | -4.458412183 | 1.286193793 | -3.466361141 | 0.000527554 | 0.003877714 |
| ENSMUSG00000050953 | 7.405577809 | -4.38760126  | 1.32842819  | -3.302851667 | 0.00095707  | 0.006409495 |
| ENSMUSG00000097950 | 3.930896832 | -4.369492462 | 1.667766423 | -2.619966682 | 0.008793836 | 0.039231756 |
| ENSMUSG00000018822 | 1736.306765 | -4.366911344 | 0.845480846 | -5.165003281 | 2.40E-07    | 4.15E-06    |
| ENSMUSG00000086163 | 14.13788212 | -4.336687968 | 0.951526435 | -4.557611651 | 5.17E-06    | 6.67E-05    |
| ENSMUSG00000086816 | 3.758762554 | -4.307230396 | 1.655576054 | -2.601650577 | 0.009277633 | 0.040889424 |
| ENSMUSG00000114804 | 3.732846078 | -4.289749364 | 1.700098552 | -2.523235702 | 0.011628043 | 0.04875296  |
| ENSMUSG00000021871 | 13.5906183  | -4.267124072 | 0.997798958 | -4.276536908 | 1.90E-05    | 0.000211874 |
| ENSMUSG00000041577 | 4134.565024 | -4.266794124 | 0.45374392  | -9.40352903  | 5.28E-21    | 4.65E-19    |
| ENSMUSG00000010311 | 29.86987316 | -4.221219584 | 0.640674088 | -6.588715949 | 4.44E-11    | 1.40E-09    |
| ENSMUSG00000091754 | 58.17004199 | -4.099271565 | 0.469810262 | -8.725376813 | 2.65E-18    | 1.85E-16    |
| ENSMUSG00000035932 | 5.945802981 | -4.05284532  | 1.380975415 | -2.934770073 | 0.003337949 | 0.017894136 |
| ENSMUSG00000104928 | 5.481528927 | -3.933143327 | 1.401866066 | -2.80564843  | 0.005021545 | 0.024912251 |
| ENSMUSG00000111326 | 5.334472487 | -3.921707452 | 1.418044659 | -2.76557401  | 0.005682271 | 0.027512011 |
| ENSMUSG00000107153 | 8.011472771 | -3.915598323 | 1.171800674 | -3.341522505 | 0.000833203 | 0.005706773 |
| ENSMUSG00000066512 | 10.54339583 | -3.90408963  | 1.057392022 | -3.692187523 | 0.000222333 | 0.001838169 |
| ENSMUSG00000000673 | 10.84940406 | -3.902301976 | 1.011347051 | -3.858519161 | 0.000114076 | 0.001027054 |
| ENSMUSG00000097993 | 10.27854515 | -3.855179989 | 1.008255693 | -3.82361341  | 0.00013151  | 0.001161967 |
| ENSMUSG00000042532 | 146.0301465 | -3.837804158 | 0.302772763 | -12.67552643 | 8.08E-37    | 2.05E-34    |
| ENSMUSG00000059136 | 4.777482025 | -3.75732993  | 1.462113803 | -2.569793078 | 0.010175928 | 0.043970812 |
| ENSMUSG00000023011 | 36.76852193 | -3.644318748 | 0.58333579  | -6.247377254 | 4.17E-10    | 1.15E-08    |
| ENSMUSG00000085126 | 11.19714003 | -3.638498468 | 0.956436746 | -3.804222794 | 0.00014225  | 0.001243559 |
| ENSMUSG00000060170 | 4.414819855 | -3.630196679 | 1.480581089 | -2.451872921 | 0.014211484 | 0.057176675 |
| ENSMUSG00000086067 | 15.54796423 | -3.607164123 | 0.789052028 | -4.571516193 | 4.84E-06    | 6.28E-05    |
| ENSMUSG00000114582 | 6.507359445 | -3.58663418  | 1.212999108 | -2.956831671 | 0.003108177 | 0.016906211 |
| ENSMUSG00000111621 | 6.498202722 | -3.560539132 | 1.225854665 | -2.904536102 | 0.003677978 | 0.019285818 |
| ENSMUSG00000026814 | 6.514954129 | -3.557232184 | 1.314455498 | -2.706240103 | 0.006804982 | 0.031902021 |

|                    |             |              |             |              |             |             |
|--------------------|-------------|--------------|-------------|--------------|-------------|-------------|
| ENSMUSG00000070834 | 8.578730108 | -3.54785222  | 1.020706163 | -3.475880079 | 0.00050918  | 0.003769994 |
| ENSMUSG00000005355 | 29.51121333 | -3.51862759  | 0.593896805 | -5.924644753 | 3.13E-09    | 7.61E-08    |
| ENSMUSG00000100151 | 10.41071133 | -3.508712031 | 0.946634017 | -3.706513784 | 0.000210132 | 0.001751177 |
| ENSMUSG00000082013 | 4.032926793 | -3.486553481 | 1.551246505 | -2.247581844 | 0.024602866 | 0.087899475 |
| ENSMUSG00000028996 | 137.3956915 | -3.479794943 | 0.388377629 | -8.959823336 | 3.25E-19    | 2.42E-17    |
| ENSMUSG00000073747 | 4.171129813 | -3.474458803 | 1.52445739  | -2.279144583 | 0.022658472 | 0.082314216 |
| ENSMUSG00000035557 | 8.06144441  | -3.464873054 | 1.207305467 | -2.869922443 | 0.004105725 | 0.021141023 |
| ENSMUSG00000032343 | 8.078854994 | -3.454346881 | 1.067208271 | -3.2368067   | 0.001208753 | 0.007757235 |
| ENSMUSG00000020327 | 4.126560645 | -3.449979581 | 1.515843245 | -2.275947459 | 0.022849155 | 0.082866598 |
| ENSMUSG00000079575 | 102.7705112 | -3.428636085 | 0.308984077 | -11.09648149 | 1.30E-28    | 2.02E-26    |
| ENSMUSG00000031927 | 3.924137405 | -3.400933373 | 1.522157975 | -2.234284107 | 0.025464385 | 0.090324025 |
| ENSMUSG00000090113 | 5.998702731 | -3.388587221 | 1.324848434 | -2.557716894 | 0.010536183 | 0.045186042 |
| ENSMUSG00000109960 | 3.954729669 | -3.380432378 | 1.573298061 | -2.148628071 | 0.031663895 | 0.106844684 |
| ENSMUSG00000110453 | 15.45346836 | -3.374314119 | 0.791145139 | -4.265101249 | 2.00E-05    | 0.000221361 |
| ENSMUSG00000051726 | 48.11364058 | -3.3385969   | 0.495337743 | -6.740041416 | 1.58E-11    | 5.33E-10    |
| ENSMUSG00000027840 | 5.53564319  | -3.327113185 | 1.26138333  | -2.637670171 | 0.008347773 | 0.037626634 |
| ENSMUSG00000114694 | 16.49532806 | -3.319333528 | 0.761037532 | -4.361589787 | 1.29E-05    | 0.000150288 |
| ENSMUSG00000030825 | 38.95264567 | -3.317892932 | 0.519850831 | -6.382394213 | 1.74E-10    | 5.10E-09    |
| ENSMUSG00000113830 | 3.739688491 | -3.316857093 | 1.492812116 | -2.221885164 | 0.026291067 | 0.092610503 |
| ENSMUSG00000036856 | 3.796117126 | -3.304015328 | 1.624159441 | -2.034292475 | 0.041922115 | 0.132638028 |
| ENSMUSG00000105150 | 10.87893731 | -3.297346638 | 0.915208744 | -3.602835592 | 0.000314765 | 0.002489208 |
| ENSMUSG00000038264 | 3088.240023 | -3.29540001  | 0.190166465 | -17.3290281  | 2.84E-67    | 2.26E-64    |
| ENSMUSG00000081392 | 16.1660641  | -3.279324997 | 0.761320758 | -4.307415712 | 1.65E-05    | 0.000187648 |
| ENSMUSG00000064588 | 5.426167091 | -3.244565223 | 1.32498175  | -2.448762199 | 0.014334805 | 0.057537886 |
| ENSMUSG00000067613 | 8.860649241 | -3.243004784 | 1.016315808 | -3.190941986 | 0.001418098 | 0.008861023 |
| ENSMUSG00000107220 | 10.93677537 | -3.242119245 | 1.01145828  | -3.205390976 | 0.001348791 | 0.008492206 |
| ENSMUSG00000105251 | 13.86134318 | -3.232848373 | 0.861302203 | -3.75344259  | 0.000174422 | 0.001485222 |
| ENSMUSG00000083685 | 7.122113192 | -3.232643721 | 1.115175569 | -2.898775593 | 0.003746229 | 0.019570076 |
| ENSMUSG00000098203 | 5.266875249 | -3.231868114 | 1.317210575 | -2.45356982  | 0.014144608 | 0.056938429 |

|                    |             |              |             |              |             |             |
|--------------------|-------------|--------------|-------------|--------------|-------------|-------------|
| ENSMUSG00000105699 | 12.17023178 | -3.214584394 | 0.884344379 | -3.634991605 | 0.00027799  | 0.002229215 |
| ENSMUSG00000025479 | 660.0755345 | -3.213451669 | 0.624643302 | -5.144458701 | 2.68E-07    | 4.60E-06    |
| ENSMUSG00000035273 | 470.3918886 | -3.198448233 | 0.236884226 | -13.50215795 | 1.52E-41    | 5.21E-39    |
| ENSMUSG00000068086 | 5.215273839 | -3.197757008 | 1.284135979 | -2.490201239 | 0.012767078 | 0.05239577  |
| ENSMUSG00000098552 | 6.634127189 | -3.191449284 | 1.193014536 | -2.675113493 | 0.007470396 | 0.034399606 |
| ENSMUSG00000070563 | 8.231344422 | -3.164859877 | 1.038606855 | -3.047216433 | 0.002309713 | 0.013244772 |
| ENSMUSG00000087248 | 6.487829281 | -3.151925044 | 1.220173526 | -2.583177701 | 0.009789489 | 0.042653278 |
| ENSMUSG00000087265 | 9.703468555 | -3.14278655  | 1.022614221 | -3.07328657  | 0.002117151 | 0.012340454 |
| ENSMUSG00000028238 | 9.794753366 | -3.137064474 | 0.986111102 | -3.181248509 | 0.001466418 | 0.009109355 |
| ENSMUSG00000085081 | 13.11071121 | -3.126015982 | 0.791231994 | -3.950821006 | 7.79E-05    | 0.000739413 |
| ENSMUSG00000105397 | 6.562232241 | -3.124488682 | 1.115132079 | -2.801900098 | 0.00508026  | 0.025165456 |
| ENSMUSG00000048424 | 27.52618292 | -3.116508312 | 0.620270524 | -5.024434003 | 5.05E-07    | 8.10E-06    |
| ENSMUSG00000042367 | 258.9795323 | -3.11325182  | 0.309744018 | -10.05104743 | 9.09E-24    | 9.79E-22    |
| ENSMUSG00000073650 | 7.927012171 | -3.095463539 | 1.049413415 | -2.949708374 | 0.00318074  | 0.017216913 |
| ENSMUSG00000107108 | 4.871308586 | -3.082284234 | 1.29191443  | -2.385826926 | 0.017040769 | 0.065703005 |
| ENSMUSG00000093619 | 7.900524969 | -3.080357723 | 1.020833556 | -3.017492622 | 0.002548752 | 0.014408043 |
| ENSMUSG00000029570 | 2098.928665 | -3.05986401  | 0.167948194 | -18.21909446 | 3.64E-74    | 4.51E-71    |
| ENSMUSG00000020734 | 41.11311147 | -3.052624556 | 0.475076907 | -6.425537652 | 1.31E-10    | 3.92E-09    |
| ENSMUSG00000086418 | 4.824607462 | -3.049878361 | 1.365771761 | -2.233080554 | 0.025543633 | 0.090520984 |
| ENSMUSG00000108033 | 6.3226472   | -3.04977431  | 1.150922543 | -2.649851921 | 0.008052706 | 0.036530388 |
| ENSMUSG00000018656 | 6.231637286 | -3.045629999 | 1.2395389   | -2.457066896 | 0.01400766  | 0.05651978  |
| ENSMUSG00000031465 | 750.0846487 | -3.044480679 | 0.17188038  | -17.71278769 | 3.34E-70    | 3.24E-67    |
| ENSMUSG00000061397 | 24.92746523 | -3.042877548 | 0.626595805 | -4.856204784 | 1.20E-06    | 1.77E-05    |
| ENSMUSG00000044084 | 15.72854708 | -3.03867069  | 0.787163701 | -3.860277965 | 0.000113258 | 0.001020925 |
| ENSMUSG00000050761 | 543.7412417 | -3.035881956 | 0.1747273   | -17.37497205 | 1.28E-67    | 1.05E-64    |
| ENSMUSG00000086010 | 12.05645586 | -3.03347256  | 0.92738782  | -3.270985982 | 0.001071732 | 0.007048275 |
| ENSMUSG00000046204 | 14.90601991 | -3.031159077 | 0.970608137 | -3.122948348 | 0.001790492 | 0.010739579 |
| ENSMUSG00000083017 | 6.144356009 | -3.027925889 | 1.15039527  | -2.632074354 | 0.008486529 | 0.038118445 |
| ENSMUSG00000021294 | 64.71471115 | -3.019040503 | 0.399071216 | -7.565167266 | 3.87E-14    | 1.76E-12    |

|                    |             |              |             |              |             |             |
|--------------------|-------------|--------------|-------------|--------------|-------------|-------------|
| ENSMUSG00000046961 | 12.1653666  | -3.016363621 | 0.868950142 | -3.471273525 | 0.000517996 | 0.003821313 |
| ENSMUSG00000044453 | 12.21157667 | -3.013022248 | 0.816252693 | -3.691286133 | 0.000223123 | 0.001843596 |
| ENSMUSG00000053654 | 10.70638783 | -2.995290644 | 1.00075273  | -2.993037695 | 0.002762156 | 0.015376647 |
| ENSMUSG00000112166 | 6.073183654 | -2.982623591 | 1.159101441 | -2.573220501 | 0.010075699 | 0.043605311 |
| ENSMUSG00000023336 | 13.36116356 | -2.979163018 | 0.760307048 | -3.91836828  | 8.92E-05    | 0.000829776 |
| ENSMUSG00000087064 | 16.35964247 | -2.973036072 | 0.736950074 | -4.034243534 | 5.48E-05    | 0.000541736 |
| ENSMUSG00000066513 | 5.910848585 | -2.972119718 | 1.192475938 | -2.49239387  | 0.012688524 | 0.052135625 |
| ENSMUSG00000063851 | 4.411326851 | -2.954741658 | 1.355421995 | -2.179942239 | 0.029261743 | 0.100457017 |
| ENSMUSG00000106913 | 5.837132398 | -2.953698556 | 1.170352691 | -2.523767903 | 0.011610456 | 0.048696196 |
| ENSMUSG00000028039 | 490.846535  | -2.952075203 | 0.175460287 | -16.82474856 | 1.61E-63    | 1.09E-60    |
| ENSMUSG00000029093 | 2161.300895 | -2.951183434 | 0.159973529 | -18.4479486  | 5.42E-76    | 8.63E-73    |
| ENSMUSG00000070645 | 5.934069425 | -2.937343463 | 1.169701003 | -2.51119171  | 0.012032433 | 0.050053217 |
| ENSMUSG00000043460 | 25.46824421 | -2.937215541 | 0.685681292 | -4.283645444 | 1.84E-05    | 0.000206142 |
| ENSMUSG00000035165 | 8017.73329  | -2.934508976 | 0.153041879 | -19.17454884 | 6.04E-82    | 1.22E-78    |
| ENSMUSG00000030409 | 2673.204851 | -2.930975375 | 0.122455861 | -23.93495377 | 1.33E-126   | 5.91E-123   |
| ENSMUSG00000046804 | 3353.472525 | -2.929204747 | 0.160896037 | -18.20557424 | 4.66E-74    | 5.47E-71    |
| ENSMUSG00000104529 | 13.19606028 | -2.922638745 | 0.786880499 | -3.714209146 | 0.00020384  | 0.001704896 |
| ENSMUSG00000003227 | 11.68467908 | -2.920480475 | 0.819781065 | -3.562512726 | 0.000367322 | 0.002848279 |
| ENSMUSG00000068407 | 11.65275762 | -2.906792828 | 0.858454051 | -3.386078528 | 0.000708991 | 0.004975207 |
| ENSMUSG00000053522 | 7.187660588 | -2.890761723 | 1.079475962 | -2.677930612 | 0.007407856 | 0.034196358 |
| ENSMUSG00000081771 | 14.18715808 | -2.883744263 | 0.741722783 | -3.887900342 | 0.000101115 | 0.000925685 |
| ENSMUSG00000108228 | 7.173488893 | -2.879741369 | 1.059340988 | -2.718427212 | 0.006559309 | 0.030925823 |
| ENSMUSG00000103015 | 78.10200484 | -2.871591627 | 0.341815145 | -8.40100759  | 4.43E-17    | 2.75E-15    |
| ENSMUSG00000068417 | 562.8844365 | -2.870867011 | 0.469321131 | -6.117063183 | 9.53E-10    | 2.49E-08    |
| ENSMUSG00000058755 | 7.020960569 | -2.852987134 | 1.2013809   | -2.374756527 | 0.017560529 | 0.067276647 |
| ENSMUSG00000087206 | 4.170260685 | -2.850334945 | 1.301169785 | -2.19059417  | 0.028481173 | 0.098388832 |
| ENSMUSG00000040543 | 30.54440701 | -2.847871818 | 0.500351594 | -5.691741274 | 1.26E-08    | 2.75E-07    |
| ENSMUSG00000085483 | 87.71371575 | -2.845900221 | 0.340101068 | -8.367807361 | 5.87E-17    | 3.59E-15    |
| ENSMUSG00000110930 | 8.373846084 | -2.840965666 | 0.992932539 | -2.861186994 | 0.00422058  | 0.021602745 |

|                    |             |              |             |              |             |             |
|--------------------|-------------|--------------|-------------|--------------|-------------|-------------|
| ENSMUSG00000061780 | 23.71940648 | -2.83737309  | 0.626162881 | -4.531365841 | 5.86E-06    | 7.42E-05    |
| ENSMUSG00000106173 | 4.08939757  | -2.833873174 | 1.357543646 | -2.087500599 | 0.036842907 | 0.120086768 |
| ENSMUSG00000102914 | 4.059000097 | -2.829156729 | 1.343084236 | -2.106462613 | 0.035164187 | 0.115851166 |
| ENSMUSG00000026432 | 8.081135522 | -2.828022945 | 1.045850972 | -2.704040079 | 0.006850203 | 0.032073561 |
| ENSMUSG00000047747 | 294.6444394 | -2.820692618 | 0.236070367 | -11.94852474 | 6.61E-33    | 1.34E-30    |
| ENSMUSG00000106191 | 5.245032795 | -2.815389789 | 1.32294522  | -2.128122727 | 0.033326909 | 0.111244336 |
| ENSMUSG00000108428 | 8.202584963 | -2.810464179 | 1.030430997 | -2.727464709 | 0.006382308 | 0.030231916 |
| ENSMUSG00000072423 | 5.348690416 | -2.807218358 | 1.274525885 | -2.202558921 | 0.027625852 | 0.096137322 |
| ENSMUSG00000115456 | 6.607796815 | -2.796081025 | 1.081185548 | -2.586125046 | 0.009706171 | 0.042386463 |
| ENSMUSG00000048992 | 2534.739011 | -2.788182887 | 0.15291735  | -18.23326715 | 2.81E-74    | 3.92E-71    |
| ENSMUSG00000067614 | 6.643476682 | -2.786447563 | 1.036871933 | -2.687359425 | 0.007201941 | 0.03337014  |
| ENSMUSG00000038216 | 8.068407771 | -2.786428377 | 1.007508905 | -2.765661288 | 0.005680751 | 0.027510623 |
| ENSMUSG00000057193 | 668.5620603 | -2.783563011 | 0.177336955 | -15.6964633  | 1.60E-55    | 8.11E-53    |
| ENSMUSG00000036264 | 189.1076321 | -2.779378461 | 0.725824882 | -3.829268644 | 0.000128525 | 0.001141924 |
| ENSMUSG00000008813 | 4.023926897 | -2.774952242 | 1.36155593  | -2.038074369 | 0.041542496 | 0.131839932 |
| ENSMUSG00000066368 | 116.4529558 | -2.773567525 | 0.359022938 | -7.725321224 | 1.12E-14    | 5.42E-13    |
| ENSMUSG00000063730 | 28.82201573 | -2.773533502 | 0.536032941 | -5.174184814 | 2.29E-07    | 3.98E-06    |
| ENSMUSG00000028460 | 9.262418561 | -2.770740205 | 1.02186336  | -2.71145861  | 0.00669879  | 0.031490245 |
| ENSMUSG00000082404 | 7.880200452 | -2.769202901 | 0.950608252 | -2.913085275 | 0.003578769 | 0.018876565 |
| ENSMUSG00000109766 | 5.231887056 | -2.763175981 | 1.249490597 | -2.211441998 | 0.027005244 | 0.094662677 |
| ENSMUSG00000110561 | 6.793503289 | -2.758923012 | 1.203262144 | -2.292869451 | 0.021855522 | 0.079993435 |
| ENSMUSG00000097226 | 5.055416173 | -2.737515842 | 1.225260255 | -2.23423214  | 0.025467803 | 0.090324025 |
| ENSMUSG00000031391 | 2666.855135 | -2.734407495 | 0.131249428 | -20.83367173 | 2.14E-96    | 4.78E-93    |
| ENSMUSG00000092304 | 5.159341216 | -2.733110131 | 1.23617338  | -2.21094401  | 0.027039715 | 0.094760878 |
| ENSMUSG00000037843 | 34.42093312 | -2.7292181   | 0.510118882 | -5.350160902 | 8.79E-08    | 1.67E-06    |
| ENSMUSG00000074280 | 3.817969812 | -2.722107018 | 1.376141227 | -1.978072428 | 0.047920537 | 0.14651438  |
| ENSMUSG00000086826 | 9.132541223 | -2.721346449 | 0.932390956 | -2.918675295 | 0.003515222 | 0.018633934 |
| ENSMUSG00000099507 | 44.43753872 | -2.718857926 | 0.435692679 | -6.240311253 | 4.37E-10    | 1.20E-08    |
| ENSMUSG00000085642 | 16.81050624 | -2.717808374 | 0.73820053  | -3.681666787 | 0.000231714 | 0.001902598 |

|                    |             |              |             |              |             |             |
|--------------------|-------------|--------------|-------------|--------------|-------------|-------------|
| ENSMUSG00000111986 | 6.296353517 | -2.715950075 | 1.097538382 | -2.474583231 | 0.013339174 | 0.054247688 |
| ENSMUSG00000026639 | 2005.570774 | -2.711721697 | 0.157344009 | -17.23434981 | 1.47E-66    | 1.13E-63    |
| ENSMUSG00000085774 | 7.582856217 | -2.706401314 | 1.07580458  | -2.515699752 | 0.011879634 | 0.049565521 |
| ENSMUSG00000029055 | 5930.264075 | -2.706167881 | 0.095791989 | -28.25046135 | 1.40E-175   | 1.57E-171   |
| ENSMUSG00000033855 | 56.00409891 | -2.705487976 | 0.433458775 | -6.241626961 | 4.33E-10    | 1.19E-08    |
| ENSMUSG00000086933 | 30.15302734 | -2.702520712 | 0.503775898 | -5.36452959  | 8.12E-08    | 1.56E-06    |
| ENSMUSG00000097315 | 18.96354232 | -2.702398106 | 0.623412831 | -4.334845181 | 1.46E-05    | 0.000168108 |
| ENSMUSG00000038756 | 10.0010897  | -2.696521701 | 0.840130922 | -3.209644631 | 0.001328992 | 0.008381743 |
| ENSMUSG00000029778 | 5.043556768 | -2.695145937 | 1.321550041 | -2.039382432 | 0.041411874 | 0.131481522 |
| ENSMUSG00000084956 | 13.89109897 | -2.694585174 | 0.819554249 | -3.287866761 | 0.001009496 | 0.006694252 |
| ENSMUSG00000026424 | 26.43677798 | -2.694277853 | 0.531835935 | -5.065994371 | 4.06E-07    | 6.64E-06    |
| ENSMUSG00000041141 | 24.79221702 | -2.692585194 | 0.598668778 | -4.497620877 | 6.87E-06    | 8.55E-05    |
| ENSMUSG00000037686 | 364.3653939 | -2.684174222 | 0.211869655 | -12.66898848 | 8.78E-37    | 2.20E-34    |
| ENSMUSG00000107430 | 6.210401499 | -2.674050959 | 1.12560234  | -2.375662225 | 0.01751749  | 0.067157908 |
| ENSMUSG00000115431 | 8.526146834 | -2.673314178 | 1.013913529 | -2.636629359 | 0.008373427 | 0.037709166 |
| ENSMUSG00000040364 | 23.49658389 | -2.671615467 | 0.659102559 | -4.05341389  | 5.05E-05    | 0.00050614  |
| ENSMUSG00000097668 | 27.3681725  | -2.662532006 | 0.562132278 | -4.736486605 | 2.17E-06    | 3.04E-05    |
| ENSMUSG00000045709 | 71.11749854 | -2.660821314 | 0.420884734 | -6.321971552 | 2.58E-10    | 7.33E-09    |
| ENSMUSG00000059668 | 25.83824008 | -2.659736325 | 0.699598391 | -3.801804519 | 0.000143646 | 0.001252816 |
| ENSMUSG00000030806 | 13.36957123 | -2.658549428 | 0.763342237 | -3.482775222 | 0.000496245 | 0.003687689 |
| ENSMUSG00000061911 | 4.73774333  | -2.656005304 | 1.354840435 | -1.96038237  | 0.049951115 | 0.150983981 |
| ENSMUSG00000081459 | 5.015667246 | -2.653849358 | 1.22926899  | -2.158884165 | 0.030859155 | 0.104635853 |
| ENSMUSG00000034656 | 3347.180006 | -2.653659861 | 0.165994399 | -15.98644219 | 1.59E-57    | 8.64E-55    |
| ENSMUSG00000108820 | 15.60920274 | -2.65264745  | 0.789216588 | -3.361114669 | 0.000776286 | 0.005357946 |
| ENSMUSG00000027420 | 148.9721639 | -2.651423174 | 0.345104772 | -7.682951356 | 1.55E-14    | 7.42E-13    |
| ENSMUSG00000021604 | 12.44945111 | -2.650179733 | 0.834487473 | -3.175817277 | 0.00149415  | 0.009243009 |
| ENSMUSG00000047641 | 45.49546956 | -2.64610983  | 0.528065383 | -5.010951131 | 5.42E-07    | 8.60E-06    |
| ENSMUSG00000036862 | 93.83651452 | -2.644668068 | 0.335947163 | -7.872273861 | 3.48E-15    | 1.79E-13    |
| ENSMUSG00000083903 | 9.8043682   | -2.642806475 | 0.845544779 | -3.125566547 | 0.001774629 | 0.010650163 |

|                    |             |              |             |              |             |             |
|--------------------|-------------|--------------|-------------|--------------|-------------|-------------|
| ENSMUSG00000052353 | 153.6100192 | -2.641615016 | 0.317483561 | -8.320478097 | 8.76E-17    | 5.17E-15    |
| ENSMUSG00000002057 | 7.329439536 | -2.636589101 | 0.982427034 | -2.683750559 | 0.00728014  | 0.033697469 |
| ENSMUSG00000026237 | 4.935338106 | -2.635220397 | 1.208315914 | -2.180903493 | 0.029190555 | 0.100273964 |
| ENSMUSG00000103226 | 5.953262292 | -2.628933111 | 1.143247356 | -2.299531328 | 0.021474787 | 0.078884733 |
| ENSMUSG00000112426 | 10.82339845 | -2.628469061 | 0.845451333 | -3.108953713 | 0.001877511 | 0.011183328 |
| ENSMUSG00000112943 | 9.697856032 | -2.627732938 | 0.930663713 | -2.823504238 | 0.00475018  | 0.02381069  |
| ENSMUSG00000110359 | 23.95147675 | -2.622665398 | 0.57598397  | -4.553365261 | 5.28E-06    | 6.77E-05    |
| ENSMUSG00000050511 | 11.90523127 | -2.614534119 | 0.763382602 | -3.424932809 | 0.000614951 | 0.00441469  |
| ENSMUSG00000082145 | 6.107877536 | -2.613563984 | 1.310734768 | -1.993968611 | 0.046155485 | 0.142564192 |
| ENSMUSG00000013562 | 4.786229815 | -2.613468425 | 1.25311951  | -2.085569975 | 0.037017593 | 0.120444901 |
| ENSMUSG00000109049 | 21.25391005 | -2.611408412 | 0.694825316 | -3.758366816 | 0.000171026 | 0.001460203 |
| ENSMUSG00000107733 | 4.661822555 | -2.608463819 | 1.280862814 | -2.036489615 | 0.041701215 | 0.132148418 |
| ENSMUSG00000028644 | 10.81864262 | -2.604361537 | 0.825755007 | -3.153915527 | 0.001610957 | 0.00986164  |
| ENSMUSG00000106614 | 4.77954423  | -2.603062627 | 1.230872608 | -2.114810753 | 0.03444608  | 0.114092088 |
| ENSMUSG00000004948 | 14.3512804  | -2.599693671 | 0.696991085 | -3.729880805 | 0.00019157  | 0.001613982 |
| ENSMUSG00000049538 | 63.91933285 | -2.591854221 | 0.426186639 | -6.081500418 | 1.19E-09    | 3.08E-08    |
| ENSMUSG00000020434 | 111.9336098 | -2.58898265  | 0.329302301 | -7.862024168 | 3.78E-15    | 1.92E-13    |
| ENSMUSG00000032278 | 138.4769967 | -2.588269998 | 0.32482426  | -7.968216398 | 1.61E-15    | 8.53E-14    |
| ENSMUSG00000050600 | 4.753627754 | -2.58664077  | 1.270553639 | -2.035837521 | 0.041766673 | 0.132271695 |
| ENSMUSG00000022619 | 99.11722595 | -2.584773584 | 0.304217643 | -8.496461793 | 1.95E-17    | 1.25E-15    |
| ENSMUSG00000022096 | 2156.265899 | -2.584279207 | 0.141975193 | -18.20232929 | 4.95E-74    | 5.51E-71    |
| ENSMUSG00000069919 | 12.69231402 | -2.569890328 | 0.904052671 | -2.84263341  | 0.00447425  | 0.022625907 |
| ENSMUSG00000033872 | 50.20054764 | -2.560975025 | 0.424880805 | -6.027514063 | 1.67E-09    | 4.21E-08    |
| ENSMUSG00000055407 | 16.29642141 | -2.558835963 | 0.652745147 | -3.920114881 | 8.85E-05    | 0.000824818 |
| ENSMUSG00000028773 | 10.60843527 | -2.556210941 | 0.877350639 | -2.913556824 | 0.003573368 | 0.018865928 |
| ENSMUSG00000031906 | 6303.726076 | -2.555091784 | 0.15911719  | -16.05792424 | 5.03E-58    | 2.88E-55    |
| ENSMUSG00000063971 | 11.85738745 | -2.553596669 | 0.914970425 | -2.790906242 | 0.00525607  | 0.025863991 |
| ENSMUSG00000107509 | 5.843179588 | -2.547885251 | 1.121553612 | -2.271746284 | 0.023101839 | 0.083630594 |
| ENSMUSG00000028078 | 77.77707241 | -2.544322061 | 0.40674358  | -6.255346579 | 3.97E-10    | 1.10E-08    |



|                    |             |              |             |              |             |             |
|--------------------|-------------|--------------|-------------|--------------|-------------|-------------|
| ENSMUSG00000062073 | 10.30827447 | -2.543076296 | 0.866282654 | -2.935619551 | 0.003328823 | 0.017858091 |
| ENSMUSG00000114962 | 15.94979104 | -2.53996146  | 0.748286399 | -3.394370741 | 0.000687865 | 0.004849851 |
| ENSMUSG00000024972 | 813.1404479 | -2.539516563 | 0.152498535 | -16.65272758 | 2.89E-62    | 1.84E-59    |
| ENSMUSG00000086373 | 8.082816401 | -2.537532853 | 0.908224155 | -2.793949973 | 0.005206853 | 0.025681914 |
| ENSMUSG00000048013 | 5.764136781 | -2.537202702 | 1.289926666 | -1.966935617 | 0.049190634 | 0.149414373 |
| ENSMUSG00000097604 | 105.4937706 | -2.536320903 | 0.320822448 | -7.905684031 | 2.66E-15    | 1.38E-13    |
| ENSMUSG00000078796 | 9.181792381 | -2.534989397 | 0.861489388 | -2.942566018 | 0.003255044 | 0.017538229 |
| ENSMUSG00000038255 | 71.48913947 | -2.533869057 | 0.41971642  | -6.037097754 | 1.57E-09    | 3.98E-08    |
| ENSMUSG00000001555 | 13.702332   | -2.531946945 | 0.736893594 | -3.435973614 | 0.000590428 | 0.004268118 |
| ENSMUSG00000068964 | 6.82936963  | -2.528574849 | 1.119696998 | -2.258267062 | 0.023929014 | 0.085974054 |
| ENSMUSG00000064691 | 6.945884205 | -2.526343057 | 1.066803218 | -2.368143454 | 0.017877603 | 0.068245193 |
| ENSMUSG00000103594 | 7.96589001  | -2.524072966 | 0.924947455 | -2.728882547 | 0.006354933 | 0.030134248 |
| ENSMUSG00000072214 | 12718.70871 | -2.519326673 | 0.105864189 | -23.79772319 | 3.53E-125   | 1.31E-121   |
| ENSMUSG00000106659 | 6.793197842 | -2.509967873 | 0.98273805  | -2.554055858 | 0.010647617 | 0.045541334 |
| ENSMUSG00000071015 | 5.603175197 | -2.500655007 | 1.246359266 | -2.006367726 | 0.044817029 | 0.139492612 |
| ENSMUSG00000000214 | 32.23375652 | -2.499833014 | 0.481017161 | -5.196972613 | 2.03E-07    | 3.57E-06    |
| ENSMUSG00000006642 | 34.57202987 | -2.499320526 | 0.498076836 | -5.0179417   | 5.22E-07    | 8.33E-06    |
| ENSMUSG00000031160 | 7.765251198 | -2.497125848 | 1.121089275 | -2.227410344 | 0.025919862 | 0.091548755 |
| ENSMUSG00000081309 | 5.69688168  | -2.496125926 | 1.13871798  | -2.192049277 | 0.028375949 | 0.098186506 |
| ENSMUSG00000086389 | 9.026676932 | -2.49075265  | 0.914838488 | -2.722614627 | 0.006476756 | 0.030620762 |
| ENSMUSG00000055629 | 1197.670826 | -2.485250939 | 0.129859451 | -19.13800583 | 1.22E-81    | 2.26E-78    |
| ENSMUSG00000115617 | 10.03863819 | -2.47992003  | 0.916902323 | -2.704671989 | 0.006837187 | 0.032032794 |
| ENSMUSG00000039521 | 5.440805119 | -2.479249772 | 1.187366539 | -2.088023951 | 0.036795674 | 0.119985426 |
| ENSMUSG00000048373 | 2147.826484 | -2.478821267 | 0.152962018 | -16.20546917 | 4.61E-59    | 2.86E-56    |
| ENSMUSG00000087314 | 9.853619358 | -2.476949755 | 0.852224282 | -2.906452922 | 0.003655519 | 0.019190614 |
| ENSMUSG00000113424 | 6.491864531 | -2.472050238 | 1.207758368 | -2.046808618 | 0.040676879 | 0.129646289 |
| ENSMUSG00000038020 | 678.5802965 | -2.469521359 | 0.203053548 | -12.16192173 | 4.96E-34    | 1.11E-31    |
| ENSMUSG00000020624 | 8.512131906 | -2.467107068 | 1.008187533 | -2.447071588 | 0.014402223 | 0.057750022 |
| ENSMUSG00000081732 | 18.71024974 | -2.466907386 | 0.629865226 | -3.916563871 | 8.98E-05    | 0.000835311 |

|                    |             |              |             |              |             |             |
|--------------------|-------------|--------------|-------------|--------------|-------------|-------------|
| ENSMUSG00000015093 | 5.396004409 | -2.465460142 | 1.139735499 | -2.163186233 | 0.030526859 | 0.103682527 |
| ENSMUSG00000020019 | 642.4562766 | -2.462800876 | 0.193951456 | -12.69802727 | 6.06E-37    | 1.57E-34    |
| ENSMUSG00000033287 | 24.14786113 | -2.460684291 | 0.554238268 | -4.439758916 | 9.01E-06    | 0.000108271 |
| ENSMUSG00000112478 | 41.89095699 | -2.45919517  | 0.441293002 | -5.572703758 | 2.51E-08    | 5.20E-07    |
| ENSMUSG00000029813 | 10.88351071 | -2.454876689 | 0.784422841 | -3.129532391 | 0.001750848 | 0.01054433  |
| ENSMUSG00000031085 | 8.631298825 | -2.453742538 | 0.896162442 | -2.738055539 | 0.006180364 | 0.029431623 |
| ENSMUSG00000054161 | 4586.742323 | -2.451068429 | 0.129060834 | -18.99157445 | 2.00E-80    | 3.43E-77    |
| ENSMUSG00000114591 | 6.281427319 | -2.449254873 | 1.212248397 | -2.020423272 | 0.043339501 | 0.135899075 |
| ENSMUSG00000039059 | 33.92764139 | -2.446046025 | 0.522614598 | -4.680401266 | 2.86E-06    | 3.89E-05    |
| ENSMUSG00000109397 | 8.783825468 | -2.43905826  | 1.009899353 | -2.415149839 | 0.015728738 | 0.061798199 |
| ENSMUSG00000086550 | 6.285908316 | -2.435197565 | 1.113794295 | -2.186397952 | 0.028786503 | 0.099160922 |
| ENSMUSG00000022603 | 9.751059515 | -2.435012587 | 0.822751961 | -2.959594996 | 0.003080437 | 0.016804508 |
| ENSMUSG00000088148 | 10.87576422 | -2.433475281 | 0.91321292  | -2.664740312 | 0.007704779 | 0.035278073 |
| ENSMUSG00000038390 | 20.20476888 | -2.422408918 | 0.606797679 | -3.992119619 | 6.55E-05    | 0.00063689  |
| ENSMUSG00000029168 | 670.2901943 | -2.418714375 | 0.257711197 | -9.385367814 | 6.27E-21    | 5.46E-19    |
| ENSMUSG00000081285 | 25.45907194 | -2.413574574 | 0.530099614 | -4.553058539 | 5.29E-06    | 6.78E-05    |
| ENSMUSG00000097294 | 12.83415868 | -2.412297363 | 0.818944826 | -2.945616465 | 0.003223118 | 0.017387216 |
| ENSMUSG00000000753 | 12.77010435 | -2.397281017 | 0.822331451 | -2.91522477  | 0.003554325 | 0.01879208  |
| ENSMUSG00000086155 | 11.39835901 | -2.395680283 | 0.889561275 | -2.693103161 | 0.007079036 | 0.032923793 |
| ENSMUSG00000048776 | 146.310376  | -2.394609994 | 0.300924113 | -7.957521153 | 1.76E-15    | 9.21E-14    |
| ENSMUSG00000024620 | 100.9068823 | -2.392069524 | 0.300340413 | -7.964527655 | 1.66E-15    | 8.74E-14    |
| ENSMUSG00000025064 | 8.364316183 | -2.39065506  | 0.880077134 | -2.716415379 | 0.006599306 | 0.031101253 |
| ENSMUSG00000111014 | 25.04678227 | -2.388290341 | 0.614390253 | -3.88725298  | 0.000101385 | 0.000927775 |
| ENSMUSG00000070304 | 2864.118474 | -2.382286903 | 0.147164724 | -16.18789368 | 6.14E-59    | 3.70E-56    |
| ENSMUSG00000082474 | 5.187315806 | -2.375305966 | 1.180415147 | -2.012263205 | 0.044192199 | 0.137932852 |
| ENSMUSG00000097720 | 6.17191534  | -2.371753478 | 1.09139039  | -2.173148581 | 0.029769136 | 0.101635258 |
| ENSMUSG00000083962 | 40.6556905  | -2.366813077 | 0.421025131 | -5.621548226 | 1.89E-08    | 4.01E-07    |
| ENSMUSG00000113883 | 59.18906419 | -2.365837727 | 0.366688363 | -6.451902935 | 1.10E-10    | 3.33E-09    |
| ENSMUSG00000040035 | 265.5999364 | -2.364121135 | 0.205900526 | -11.4818606  | 1.63E-30    | 2.95E-28    |

|                    |             |              |             |              |             |             |
|--------------------|-------------|--------------|-------------|--------------|-------------|-------------|
| ENSMUSG00000101162 | 16.29392462 | -2.353664372 | 0.669146195 | -3.517414264 | 0.000435773 | 0.003303255 |
| ENSMUSG00000073739 | 92.99254058 | -2.348022838 | 0.328166633 | -7.154971285 | 8.37E-13    | 3.29E-11    |
| ENSMUSG00000065574 | 7.094875667 | -2.345217504 | 1.03503725  | -2.265829085 | 0.02346185  | 0.084653334 |
| ENSMUSG00000105402 | 6.252851148 | -2.343966162 | 1.120786013 | -2.09135922  | 0.036495875 | 0.119410428 |
| ENSMUSG00000114163 | 6.219866979 | -2.343234648 | 1.078236877 | -2.173209523 | 0.029764551 | 0.101635165 |
| ENSMUSG00000091373 | 8.186862331 | -2.335779401 | 0.969296745 | -2.409767095 | 0.015962707 | 0.062475313 |
| ENSMUSG00000031825 | 5.138445974 | -2.332967615 | 1.128597917 | -2.067137977 | 0.038721154 | 0.12498487  |
| ENSMUSG00000006542 | 15.40470007 | -2.325546284 | 0.715632979 | -3.249635431 | 0.00115553  | 0.007486776 |
| ENSMUSG00000030911 | 5.926476689 | -2.31971896  | 1.134198445 | -2.04524964  | 0.040830253 | 0.130040391 |
| ENSMUSG00000032988 | 47.05932015 | -2.318317611 | 0.499104751 | -4.644952005 | 3.40E-06    | 4.53E-05    |
| ENSMUSG00000086924 | 16.23653974 | -2.317018813 | 0.735924725 | -3.148445398 | 0.001641414 | 0.010012355 |
| ENSMUSG00000020867 | 20.36561863 | -2.316044677 | 0.617881637 | -3.748363019 | 0.000177993 | 0.001511005 |
| ENSMUSG00000039747 | 1206.090714 | -2.314632831 | 0.130994344 | -17.66971585 | 7.18E-70    | 6.67E-67    |
| ENSMUSG00000115778 | 9.097702814 | -2.310106806 | 0.843167709 | -2.739795157 | 0.006147749 | 0.029295073 |
| ENSMUSG00000032323 | 14.13248418 | -2.309028071 | 0.774560095 | -2.981083181 | 0.002872308 | 0.015865964 |
| ENSMUSG00000092518 | 33.91299198 | -2.30793348  | 0.467789805 | -4.933697692 | 8.07E-07    | 1.24E-05    |
| ENSMUSG00000073608 | 41.18775548 | -2.296533082 | 0.475022633 | -4.834576128 | 1.33E-06    | 1.95E-05    |
| ENSMUSG00000097686 | 6.15222847  | -2.291834203 | 1.149324337 | -1.994070889 | 0.046144308 | 0.142549413 |
| ENSMUSG00000025083 | 26.69834285 | -2.287430072 | 0.499575417 | -4.578748258 | 4.68E-06    | 6.08E-05    |
| ENSMUSG00000037005 | 274.2390413 | -2.286233385 | 0.206724954 | -11.05930047 | 1.98E-28    | 2.96E-26    |
| ENSMUSG00000018727 | 20.46125303 | -2.284271596 | 0.763500393 | -2.991840762 | 0.002773009 | 0.015425509 |
| ENSMUSG00000024973 | 10.84091955 | -2.279670946 | 0.774136534 | -2.944791835 | 0.00323172  | 0.017429405 |
| ENSMUSG00000065483 | 4.942599808 | -2.277220887 | 1.149514555 | -1.981028319 | 0.047588098 | 0.145837869 |
| ENSMUSG00000073179 | 19.51595566 | -2.271456397 | 0.655455884 | -3.465460383 | 0.000529325 | 0.003887689 |
| ENSMUSG00000028357 | 1612.885637 | -2.264566818 | 0.197531705 | -11.4643207  | 1.99E-30    | 3.53E-28    |
| ENSMUSG00000084983 | 20.6243178  | -2.264223638 | 0.565285576 | -4.005450931 | 6.19E-05    | 0.000605446 |
| ENSMUSG00000027452 | 4432.513498 | -2.263467041 | 0.125039176 | -18.10206306 | 3.07E-73    | 3.26E-70    |
| ENSMUSG00000054342 | 4293.509263 | -2.258547976 | 0.133268218 | -16.94738627 | 2.01E-64    | 1.40E-61    |
| ENSMUSG00000087321 | 9.636536533 | -2.258509215 | 0.895136358 | -2.523089577 | 0.011632876 | 0.048764056 |

|                    |             |              |             |              |             |             |
|--------------------|-------------|--------------|-------------|--------------|-------------|-------------|
| ENSMUSG00000097004 | 81.99519854 | -2.256942427 | 0.435956852 | -5.176985787 | 2.25E-07    | 3.93E-06    |
| ENSMUSG00000033837 | 6.848454047 | -2.256195084 | 0.95316231  | -2.367062838 | 0.017929888 | 0.068421362 |
| ENSMUSG00000020125 | 54.01474696 | -2.255992096 | 0.489530621 | -4.608480037 | 4.06E-06    | 5.36E-05    |
| ENSMUSG00000033227 | 13.44732058 | -2.255451478 | 0.836536453 | -2.696178357 | 0.00701401  | 0.032669055 |
| ENSMUSG00000017417 | 5.834179631 | -2.255381713 | 1.061561775 | -2.124588287 | 0.033620982 | 0.111935684 |
| ENSMUSG00000026125 | 5.750121853 | -2.253860874 | 1.126113648 | -2.001450632 | 0.045343849 | 0.140759072 |
| ENSMUSG00000052026 | 441.7181979 | -2.250627272 | 0.201150831 | -11.18875451 | 4.63E-29    | 7.48E-27    |
| ENSMUSG00000020469 | 87.60596524 | -2.246676307 | 0.333696606 | -6.732691513 | 1.67E-11    | 5.60E-10    |
| ENSMUSG00000073559 | 9.85157166  | -2.245221879 | 0.905350004 | -2.479949047 | 0.013140116 | 0.05364044  |
| ENSMUSG00000056481 | 8.827337762 | -2.243646029 | 0.900490412 | -2.491582364 | 0.012717548 | 0.052221328 |
| ENSMUSG00000024223 | 15.39725381 | -2.243034589 | 0.712796189 | -3.146810582 | 0.001650619 | 0.010052006 |
| ENSMUSG00000023039 | 5672.073968 | -2.240348588 | 0.153733198 | -14.57296552 | 4.17E-48    | 1.69E-45    |
| ENSMUSG00000007877 | 21.79777241 | -2.236378777 | 0.682717381 | -3.275702129 | 0.001053997 | 0.006954195 |
| ENSMUSG00000033192 | 15.47398352 | -2.236367073 | 0.677228112 | -3.30223603  | 0.000959173 | 0.006418163 |
| ENSMUSG00000037379 | 9.595797531 | -2.233270766 | 0.852442205 | -2.619850064 | 0.008796843 | 0.039231756 |
| ENSMUSG00000062410 | 45.65710987 | -2.222017791 | 0.451518884 | -4.921206774 | 8.60E-07    | 1.32E-05    |
| ENSMUSG00000082101 | 19.23602077 | -2.219874791 | 0.585614016 | -3.790679064 | 0.000150236 | 0.001302142 |
| ENSMUSG00000083485 | 10.63272206 | -2.219677122 | 0.807859908 | -2.747601532 | 0.006003292 | 0.028735654 |
| ENSMUSG00000064147 | 31.1763283  | -2.219146058 | 0.584666911 | -3.795573202 | 0.000147303 | 0.001279703 |
| ENSMUSG00000087486 | 29.75660772 | -2.218044245 | 0.49898502  | -4.445111891 | 8.78E-06    | 0.000105895 |
| ENSMUSG00000103685 | 7.597494307 | -2.217449338 | 0.95490367  | -2.322170716 | 0.020223745 | 0.075130725 |
| ENSMUSG00000085723 | 16.25505431 | -2.207016024 | 0.667681782 | -3.305490856 | 0.000948102 | 0.006357072 |
| ENSMUSG00000001588 | 147.672568  | -2.206302239 | 0.297018007 | -7.428176707 | 1.10E-13    | 4.71E-12    |
| ENSMUSG00000063239 | 554.9222388 | -2.206110811 | 0.494769643 | -4.45886453  | 8.24E-06    | 0.000100136 |
| ENSMUSG00000037509 | 272.2340289 | -2.206044853 | 0.267085503 | -8.259695234 | 1.46E-16    | 8.42E-15    |
| ENSMUSG00000104945 | 11.15380595 | -2.200962069 | 0.817298971 | -2.69297056  | 0.007081852 | 0.032930022 |
| ENSMUSG00000095681 | 36.66265504 | -2.200711    | 0.531811761 | -4.138139019 | 3.50E-05    | 0.000363909 |
| ENSMUSG00000029026 | 13.15458125 | -2.198942615 | 0.691186002 | -3.181405017 | 0.001465626 | 0.009106971 |
| ENSMUSG00000021553 | 399.2032473 | -2.198463046 | 0.188787617 | -11.64516551 | 2.43E-31    | 4.69E-29    |

|                    |             |              |             |              |             |             |
|--------------------|-------------|--------------|-------------|--------------|-------------|-------------|
| ENSMUSG00000031510 | 5.596907689 | -2.198239965 | 1.118032884 | -1.96616754  | 0.049279261 | 0.149581706 |
| ENSMUSG00000020916 | 18.0231174  | -2.19340012  | 0.638651073 | -3.43442642  | 0.000593809 | 0.004289777 |
| ENSMUSG00000034818 | 75.53828379 | -2.192846934 | 0.381646143 | -5.745759457 | 9.15E-09    | 2.06E-07    |
| ENSMUSG00000059898 | 6.762726588 | -2.192349566 | 1.073564309 | -2.042122255 | 0.041139406 | 0.130858635 |
| ENSMUSG00000074467 | 12.27809143 | -2.190992526 | 0.780826297 | -2.805992237 | 0.00501619  | 0.024892313 |
| ENSMUSG00000081376 | 6.477690753 | -2.189419036 | 1.088430298 | -2.011538121 | 0.044268648 | 0.138132799 |
| ENSMUSG00000044041 | 66.18518635 | -2.18783991  | 0.378086093 | -5.786618312 | 7.18E-09    | 1.65E-07    |
| ENSMUSG00000024619 | 9576.666527 | -2.18472887  | 0.100474452 | -21.74412319 | 7.85E-105   | 2.50E-101   |
| ENSMUSG00000050463 | 267.5839655 | -2.180781008 | 0.337672575 | -6.458271018 | 1.06E-10    | 3.20E-09    |
| ENSMUSG00000066714 | 16.63314346 | -2.178340351 | 0.68501273  | -3.179999809 | 0.001472751 | 0.009138517 |
| ENSMUSG00000112975 | 109.7092765 | -2.177379225 | 0.317576349 | -6.856238601 | 7.07E-12    | 2.48E-10    |
| ENSMUSG00000085179 | 12.28215227 | -2.176606715 | 0.849374893 | -2.562598368 | 0.010389215 | 0.044693266 |
| ENSMUSG00000063929 | 37.59159368 | -2.176177804 | 0.514946458 | -4.226027332 | 2.38E-05    | 0.000257493 |
| ENSMUSG00000023274 | 45.3800852  | -2.175951911 | 0.402738871 | -5.402885261 | 6.56E-08    | 1.28E-06    |
| ENSMUSG00000042766 | 133.1788352 | -2.174462993 | 0.326564192 | -6.658608167 | 2.76E-11    | 9.01E-10    |
| ENSMUSG00000028278 | 1679.176799 | -2.168607536 | 0.167698627 | -12.93157596 | 2.99E-38    | 8.22E-36    |
| ENSMUSG00000021298 | 12.19669878 | -2.165935758 | 0.834062965 | -2.596849216 | 0.009408321 | 0.041342853 |
| ENSMUSG00000019987 | 66.48854807 | -2.163295937 | 0.339059438 | -6.380285271 | 1.77E-10    | 5.16E-09    |
| ENSMUSG00000082850 | 15.83304418 | -2.159810855 | 0.710682471 | -3.039065886 | 0.002373129 | 0.013552666 |
| ENSMUSG00000097990 | 11.77517346 | -2.15691748  | 0.765909291 | -2.81615265  | 0.004860257 | 0.02426937  |
| ENSMUSG00000027470 | 18.19100749 | -2.15681409  | 0.622918297 | -3.462434962 | 0.000535311 | 0.003923635 |
| ENSMUSG00000057719 | 624.8193521 | -2.153140333 | 0.188328479 | -11.43289823 | 2.86E-30    | 4.91E-28    |
| ENSMUSG00000108313 | 5.493589313 | -2.150807477 | 1.066818675 | -2.016094701 | 0.043790074 | 0.136965279 |
| ENSMUSG00000024910 | 85.95910847 | -2.149986472 | 0.370953475 | -5.795838609 | 6.80E-09    | 1.56E-07    |
| ENSMUSG00000114943 | 16.48628188 | -2.147046688 | 0.668270871 | -3.212838955 | 0.0013143   | 0.008307879 |
| ENSMUSG00000006574 | 22.87593288 | -2.146833929 | 0.554009463 | -3.875085305 | 0.000106587 | 0.000970206 |
| ENSMUSG00000031891 | 499.5998104 | -2.145663474 | 0.204289363 | -10.5030602  | 8.36E-26    | 1.04E-23    |
| ENSMUSG00000109186 | 63.17921177 | -2.142890747 | 0.371076437 | -5.774796057 | 7.70E-09    | 1.76E-07    |
| ENSMUSG00000037989 | 5308.602895 | -2.142593458 | 0.117593077 | -18.22040478 | 3.56E-74    | 4.51E-71    |

|                    |             |              |             |              |             |             |
|--------------------|-------------|--------------|-------------|--------------|-------------|-------------|
| ENSMUSG00000033826 | 21496.70109 | -2.141802628 | 0.160462476 | -13.34768531 | 1.22E-40    | 3.88E-38    |
| ENSMUSG00000114212 | 19.02946105 | -2.140906481 | 0.622736206 | -3.437902695 | 0.000586238 | 0.004244708 |
| ENSMUSG00000086719 | 7.270397318 | -2.137433467 | 0.914841355 | -2.33639795  | 0.019470511 | 0.072859663 |
| ENSMUSG00000034792 | 19.96366676 | -2.134925101 | 0.601660642 | -3.548387498 | 0.000387598 | 0.002979598 |
| ENSMUSG00000028356 | 69.46342607 | -2.131358851 | 0.363858346 | -5.857661015 | 4.69E-09    | 1.11E-07    |
| ENSMUSG00000083001 | 19.29978991 | -2.129865147 | 0.631950379 | -3.370304407 | 0.000750852 | 0.005216432 |
| ENSMUSG00000037159 | 47.03863423 | -2.12862622  | 0.400387497 | -5.316415311 | 1.06E-07    | 1.97E-06    |
| ENSMUSG00000085170 | 11.69184538 | -2.127066752 | 0.787637152 | -2.700566812 | 0.006922143 | 0.032328946 |
| ENSMUSG00000114245 | 43.45464441 | -2.127036788 | 0.460849413 | -4.615470321 | 3.92E-06    | 5.19E-05    |
| ENSMUSG00000041872 | 17.37390863 | -2.126009593 | 0.660103193 | -3.220723085 | 0.001278676 | 0.008126464 |
| ENSMUSG00000029811 | 4162.919667 | -2.114797352 | 0.217052039 | -9.743273355 | 1.97E-22    | 1.96E-20    |
| ENSMUSG00000049154 | 234.0146655 | -2.10857968  | 0.229287289 | -9.196234507 | 3.71E-20    | 3.04E-18    |
| ENSMUSG00000018217 | 17.61162823 | -2.108239782 | 0.650294714 | -3.241975888 | 0.001187041 | 0.007644295 |
| ENSMUSG00000038354 | 19.51296478 | -2.101749299 | 0.592753847 | -3.545737087 | 0.000391517 | 0.003003513 |
| ENSMUSG00000019539 | 28.42511801 | -2.101676429 | 0.495890839 | -4.238183619 | 2.25E-05    | 0.000245252 |
| ENSMUSG00000043705 | 1472.860651 | -2.094454591 | 0.219312498 | -9.550092287 | 1.30E-21    | 1.22E-19    |
| ENSMUSG00000009248 | 2078.260702 | -2.094129822 | 0.169533903 | -12.35227753 | 4.74E-35    | 1.10E-32    |
| ENSMUSG00000097812 | 17.90563049 | -2.093659589 | 0.759633971 | -2.756142655 | 0.005848748 | 0.028177346 |
| ENSMUSG00000063529 | 14.10635431 | -2.093523874 | 0.686813141 | -3.048170965 | 0.002302389 | 0.013212964 |
| ENSMUSG00000009876 | 24.89004662 | -2.093438296 | 0.550700004 | -3.801413258 | 0.000143873 | 0.001254306 |
| ENSMUSG00000000594 | 680.0884872 | -2.093224581 | 0.13198182  | -15.85994627 | 1.20E-56    | 6.37E-54    |
| ENSMUSG00000029134 | 42.8755603  | -2.093171599 | 0.415936213 | -5.03243414  | 4.84E-07    | 7.81E-06    |
| ENSMUSG00000046337 | 6.997907723 | -2.090814937 | 0.961524971 | -2.174478042 | 0.029669253 | 0.101434003 |
| ENSMUSG00000006269 | 8.583653799 | -2.090722451 | 0.968131847 | -2.159543101 | 0.030808057 | 0.10447848  |
| ENSMUSG00000028040 | 1140.942257 | -2.087594442 | 0.148458878 | -14.061769   | 6.52E-45    | 2.42E-42    |
| ENSMUSG00000007097 | 10.58123449 | -2.086318384 | 0.769156866 | -2.712474498 | 0.006678292 | 0.031407126 |
| ENSMUSG00000046952 | 24.53300993 | -2.085241928 | 0.780217864 | -2.672640583 | 0.007525683 | 0.034611315 |
| ENSMUSG00000093446 | 7.079566122 | -2.084838323 | 0.957452805 | -2.177484166 | 0.029444462 | 0.100953317 |
| ENSMUSG00000089697 | 25.80922725 | -2.083352437 | 0.566183934 | -3.679638914 | 0.000233564 | 0.001917085 |

|                    |             |              |             |              |             |             |
|--------------------|-------------|--------------|-------------|--------------|-------------|-------------|
| ENSMUSG00000026246 | 17.73729131 | -2.081596025 | 0.652822194 | -3.188610995 | 0.001429581 | 0.00891077  |
| ENSMUSG00000018126 | 11133.50881 | -2.079664645 | 0.154588912 | -13.45287066 | 2.96E-41    | 9.86E-39    |
| ENSMUSG00000091105 | 8.838321057 | -2.078120436 | 0.880253509 | -2.360820395 | 0.018234559 | 0.069299405 |
| ENSMUSG00000085887 | 46.68207648 | -2.075458853 | 0.487634034 | -4.256181292 | 2.08E-05    | 0.000229123 |
| ENSMUSG00000102189 | 14.07606541 | -2.075354881 | 0.683603707 | -3.035903492 | 0.002398161 | 0.013667434 |
| ENSMUSG00000036585 | 167.6983755 | -2.069815732 | 0.230869916 | -8.965289911 | 3.09E-19    | 2.31E-17    |
| ENSMUSG00000074113 | 30.45291321 | -2.068999565 | 0.475666547 | -4.349684829 | 1.36E-05    | 0.000157777 |
| ENSMUSG00000028236 | 65.91252183 | -2.065044249 | 0.36191926  | -5.705814746 | 1.16E-08    | 2.55E-07    |
| ENSMUSG00000097800 | 126.6877402 | -2.062274635 | 0.287279469 | -7.178635637 | 7.04E-13    | 2.78E-11    |
| ENSMUSG00000035580 | 109.3183392 | -2.061194572 | 0.305382828 | -6.749543143 | 1.48E-11    | 5.01E-10    |
| ENSMUSG00000084939 | 1826.946992 | -2.058786607 | 0.188568849 | -10.91795709 | 9.46E-28    | 1.33E-25    |
| ENSMUSG00000086422 | 29.82373282 | -2.058551338 | 0.498675124 | -4.128040961 | 3.66E-05    | 0.000378793 |
| ENSMUSG00000082308 | 27.59684418 | -2.056541412 | 0.585661    | -3.511487722 | 0.000445606 | 0.00335725  |
| ENSMUSG00000034871 | 7.812534273 | -2.055424314 | 1.013171677 | -2.028702895 | 0.042488561 | 0.133814065 |
| ENSMUSG00000041165 | 13.90301899 | -2.053381487 | 0.748920179 | -2.741789506 | 0.006110549 | 0.029142717 |
| ENSMUSG00000047205 | 289.7038361 | -2.052006022 | 0.198778125 | -10.32309777 | 5.54E-25    | 6.57E-23    |
| ENSMUSG00000005465 | 25.23815821 | -2.051910804 | 0.521890946 | -3.931684997 | 8.44E-05    | 0.000792395 |
| ENSMUSG00000108840 | 19.75744803 | -2.051116249 | 0.591883612 | -3.465404694 | 0.000529434 | 0.003887689 |
| ENSMUSG00000024600 | 9.272384982 | -2.048576054 | 1.019356497 | -2.00967577  | 0.044465516 | 0.138611332 |
| ENSMUSG00000086949 | 28.20392395 | -2.046434051 | 0.53868327  | -3.79895602  | 0.000145307 | 0.001265448 |
| ENSMUSG00000074203 | 6.899070343 | -2.046204543 | 0.925579778 | -2.210727364 | 0.027054722 | 0.094773377 |
| ENSMUSG00000029844 | 26.15665163 | -2.045140803 | 0.535451017 | -3.819473185 | 0.000133737 | 0.001177445 |
| ENSMUSG00000020908 | 57.52462281 | -2.044977701 | 0.39390034  | -5.191611924 | 2.08E-07    | 3.65E-06    |
| ENSMUSG00000032502 | 11.4788203  | -2.044739462 | 0.811415835 | -2.519964948 | 0.011736652 | 0.049097558 |
| ENSMUSG00000109237 | 43.4310712  | -2.043816357 | 0.406317276 | -5.030099576 | 4.90E-07    | 7.90E-06    |
| ENSMUSG00000083436 | 6.009925779 | -2.043214438 | 0.991985641 | -2.059721788 | 0.039425145 | 0.126703002 |
| ENSMUSG00000044860 | 3836.840867 | -2.041295339 | 0.203378404 | -10.03693262 | 1.05E-23    | 1.12E-21    |
| ENSMUSG00000068617 | 108.1734218 | -2.039391303 | 0.296151089 | -6.886320462 | 5.73E-12    | 2.03E-10    |
| ENSMUSG00000041046 | 10.29502707 | -2.038650455 | 0.82527138  | -2.470278874 | 0.013500776 | 0.054781805 |

|                    |             |              |             |              |             |             |
|--------------------|-------------|--------------|-------------|--------------|-------------|-------------|
| ENSMUSG00000075296 | 18.68214188 | -2.036246757 | 0.654936143 | -3.109076782 | 0.001876729 | 0.011181657 |
| ENSMUSG00000048537 | 2119.908485 | -2.033397114 | 0.134027303 | -15.17151404 | 5.46E-52    | 2.54E-49    |
| ENSMUSG00000099141 | 6.036868211 | -2.03250907  | 0.989207453 | -2.054684348 | 0.039909503 | 0.127876698 |
| ENSMUSG00000045589 | 9.531929802 | -2.030487767 | 0.866582617 | -2.343097736 | 0.019124373 | 0.071969204 |
| ENSMUSG00000094430 | 97.54025396 | -2.030246656 | 0.270192698 | -7.514069302 | 5.73E-14    | 2.55E-12    |
| ENSMUSG00000036110 | 26.93463704 | -2.025661895 | 0.551020186 | -3.676202701 | 0.000236731 | 0.001938798 |
| ENSMUSG00000108503 | 8.674931258 | -2.025327517 | 0.888651851 | -2.279101219 | 0.022661049 | 0.082314216 |
| ENSMUSG00000030406 | 86.30753126 | -2.023942637 | 0.36036741  | -5.616330955 | 1.95E-08    | 4.12E-07    |
| ENSMUSG00000083016 | 10.12878309 | -2.023598375 | 0.800280529 | -2.528611282 | 0.011451478 | 0.048230294 |
| ENSMUSG00000099474 | 127.6355253 | -2.022985907 | 0.309747839 | -6.531073524 | 6.53E-11    | 2.02E-09    |
| ENSMUSG00000030796 | 731.5884675 | -2.021294041 | 0.142420418 | -14.19244564 | 1.02E-45    | 3.86E-43    |
| ENSMUSG00000026344 | 30.72456264 | -2.020601839 | 0.520221418 | -3.884118897 | 0.000102702 | 0.000938283 |
| ENSMUSG00000090990 | 11.81412514 | -2.018683605 | 0.742413411 | -2.71908289  | 0.00654632  | 0.030877641 |
| ENSMUSG00000021806 | 1035.000759 | -2.018554387 | 0.424891343 | -4.750754332 | 2.03E-06    | 2.85E-05    |
| ENSMUSG00000045838 | 223.4713183 | -2.017433187 | 0.205771045 | -9.804261735 | 1.08E-22    | 1.09E-20    |
| ENSMUSG00000085836 | 37.36048704 | -2.016095275 | 0.531034326 | -3.796544174 | 0.000146727 | 0.0012752   |
| ENSMUSG00000033963 | 7.684629109 | -2.015647557 | 0.917628253 | -2.196584019 | 0.028050169 | 0.097255412 |
| ENSMUSG00000097767 | 127.4218368 | -2.014051119 | 0.382991981 | -5.258729213 | 1.45E-07    | 2.63E-06    |
| ENSMUSG00000110052 | 17.95461467 | -2.013541351 | 0.726216628 | -2.772645617 | 0.005560264 | 0.027026905 |
| ENSMUSG00000033350 | 113.4354658 | -2.012109407 | 0.872177149 | -2.306996244 | 0.02105503  | 0.077611275 |
| ENSMUSG00000013611 | 17.75709301 | -2.011425748 | 0.618988267 | -3.249537761 | 0.001155927 | 0.007487172 |
| ENSMUSG00000058626 | 52.1725657  | -2.011216395 | 0.55174143  | -3.645215469 | 0.000267168 | 0.002152497 |
| ENSMUSG00000033210 | 16.20653482 | -2.010129291 | 0.624582238 | -3.218358078 | 0.001289268 | 0.008168169 |
| ENSMUSG00000049130 | 24.29240254 | -2.009065256 | 0.529863088 | -3.791668643 | 0.000149638 | 0.001297973 |
| ENSMUSG00000031410 | 140.1911679 | -2.008634505 | 0.269984035 | -7.439826979 | 1.01E-13    | 4.34E-12    |
| ENSMUSG00000044716 | 255.3843875 | -2.005242491 | 0.210826494 | -9.511340128 | 1.88E-21    | 1.74E-19    |
| ENSMUSG00000109603 | 60.42134929 | -2.001311217 | 0.335373827 | -5.9674043   | 2.41E-09    | 5.96E-08    |
| ENSMUSG00000035277 | 52.62793263 | -2.000192    | 0.402390099 | -4.97077837  | 6.67E-07    | 1.04E-05    |
| ENSMUSG00000040694 | 33.12301689 | -1.999817118 | 0.510257301 | -3.919232736 | 8.88E-05    | 0.000827151 |



|                    |             |              |             |              |             |             |
|--------------------|-------------|--------------|-------------|--------------|-------------|-------------|
| ENSMUSG00000096847 | 207.2308205 | -1.999646294 | 0.269039408 | -7.432540494 | 1.07E-13    | 4.57E-12    |
| ENSMUSG00000113506 | 27.69112727 | -1.995834761 | 0.645152369 | -3.093586659 | 0.001977528 | 0.01168544  |
| ENSMUSG00000026796 | 4901.413511 | -1.994239387 | 0.124384266 | -16.03289104 | 7.53E-58    | 4.20E-55    |
| ENSMUSG00000036528 | 1467.908698 | -1.992353141 | 0.180592114 | -11.03233745 | 2.67E-28    | 3.91E-26    |
| ENSMUSG00000099364 | 25.17231033 | -1.991237636 | 0.508314648 | -3.917332784 | 8.95E-05    | 0.000833    |
| ENSMUSG00000074224 | 16.17188708 | -1.990446524 | 0.726524587 | -2.739682261 | 0.006149861 | 0.029298877 |
| ENSMUSG00000035969 | 114.30662   | -1.988878382 | 0.267954455 | -7.422449401 | 1.15E-13    | 4.90E-12    |
| ENSMUSG00000115437 | 29.43643885 | -1.987945374 | 0.51685941  | -3.846201372 | 0.000119963 | 0.001070976 |
| ENSMUSG00000087406 | 51.04408383 | -1.987069057 | 0.359019834 | -5.534705528 | 3.12E-08    | 6.34E-07    |
| ENSMUSG00000025467 | 8579.693195 | -1.984770029 | 0.22113709  | -8.975292341 | 2.83E-19    | 2.13E-17    |
| ENSMUSG00000084854 | 7.562693921 | -1.984765216 | 0.933657    | -2.125796964 | 0.033520169 | 0.111772322 |
| ENSMUSG00000020431 | 225.5041266 | -1.984184853 | 0.224180268 | -8.850845227 | 8.69E-19    | 6.31E-17    |
| ENSMUSG00000033066 | 206.8610197 | -1.982984569 | 0.275552724 | -7.196388927 | 6.18E-13    | 2.47E-11    |
| ENSMUSG00000044034 | 9.215507413 | -1.980128801 | 0.827978201 | -2.391522867 | 0.016778639 | 0.064871779 |
| ENSMUSG00000090327 | 96.92510064 | -1.976578724 | 0.277871724 | -7.113277654 | 1.13E-12    | 4.38E-11    |
| ENSMUSG00000030125 | 34.71533362 | -1.976108914 | 0.475519017 | -4.155688508 | 3.24E-05    | 0.00033971  |
| ENSMUSG00000028332 | 153.6080265 | -1.974792649 | 0.241078535 | -8.191491    | 2.58E-16    | 1.43E-14    |
| ENSMUSG00000025082 | 613.5176633 | -1.973334419 | 0.1959249   | -10.07189194 | 7.35E-24    | 8.08E-22    |
| ENSMUSG00000076438 | 22.46828556 | -1.972586797 | 0.525472651 | -3.753928572 | 0.000174084 | 0.00148291  |
| ENSMUSG00000056155 | 20.68843563 | -1.972172158 | 0.55305666  | -3.565949564 | 0.000362541 | 0.002816102 |
| ENSMUSG00000040632 | 8.99199529  | -1.969420133 | 0.874173718 | -2.252893324 | 0.024265876 | 0.086879198 |
| ENSMUSG00000001566 | 802.110737  | -1.965548372 | 0.207151557 | -9.488455716 | 2.34E-21    | 2.13E-19    |
| ENSMUSG00000037169 | 674.1131367 | -1.965384786 | 0.241634457 | -8.133710767 | 4.16E-16    | 2.29E-14    |
| ENSMUSG00000110706 | 9.846139287 | -1.964927735 | 0.891745961 | -2.203461323 | 0.02756225  | 0.095936591 |
| ENSMUSG00000112664 | 15.01700416 | -1.962008597 | 0.707469581 | -2.773276265 | 0.005549499 | 0.027015798 |
| ENSMUSG00000105124 | 14.05375994 | -1.961372428 | 0.711758596 | -2.755670867 | 0.00585719  | 0.02820583  |
| ENSMUSG00000101693 | 8.38063025  | -1.959766856 | 0.929428145 | -2.108572747 | 0.034981477 | 0.115414986 |
| ENSMUSG00000068735 | 2013.439231 | -1.95883273  | 0.168055751 | -11.65585063 | 2.14E-31    | 4.19E-29    |
| ENSMUSG00000022758 | 17.39355551 | -1.957486877 | 0.631673266 | -3.098891442 | 0.001942462 | 0.011511783 |

|                    |             |              |             |              |             |             |
|--------------------|-------------|--------------|-------------|--------------|-------------|-------------|
| ENSMUSG00000037185 | 69.4910453  | -1.95179892  | 0.361383067 | -5.400914142 | 6.63E-08    | 1.29E-06    |
| ENSMUSG00000079889 | 29.81834479 | -1.951318506 | 0.494349176 | -3.947247414 | 7.91E-05    | 0.000748303 |
| ENSMUSG00000000791 | 34.47069475 | -1.947327928 | 0.484515663 | -4.019122762 | 5.84E-05    | 0.000573885 |
| ENSMUSG00000031937 | 362.9413182 | -1.94500564  | 0.175794618 | -11.06407958 | 1.87E-28    | 2.82E-26    |
| ENSMUSG00000115220 | 9.62696464  | -1.943375861 | 0.82263663  | -2.362374577 | 0.018158285 | 0.069068379 |
| ENSMUSG00000025401 | 12148.17639 | -1.943345445 | 0.178420992 | -10.89191036 | 1.26E-27    | 1.76E-25    |
| ENSMUSG00000020216 | 15.73413    | -1.941470121 | 0.669280919 | -2.900829931 | 0.003721758 | 0.019478744 |
| ENSMUSG00000043110 | 60.73641252 | -1.940931269 | 0.352101576 | -5.512418571 | 3.54E-08    | 7.14E-07    |
| ENSMUSG00000043843 | 46.77260169 | -1.940362565 | 0.440368783 | -4.40622188  | 1.05E-05    | 0.000124315 |
| ENSMUSG00000037032 | 24.25181202 | -1.93745437  | 0.615339351 | -3.148594944 | 0.001640574 | 0.010009971 |
| ENSMUSG00000096917 | 231.1226901 | -1.936942068 | 0.291151386 | -6.652697402 | 2.88E-11    | 9.36E-10    |
| ENSMUSG00000045087 | 10.52606739 | -1.935915484 | 0.806228739 | -2.401198804 | 0.016341456 | 0.06359498  |
| ENSMUSG00000100215 | 15.33335345 | -1.934722044 | 0.661153305 | -2.926283555 | 0.003430381 | 0.018288532 |
| ENSMUSG00000113665 | 20.43571801 | -1.932717208 | 0.626303952 | -3.085909327 | 0.002029307 | 0.01192499  |
| ENSMUSG00000021913 | 183.6841107 | -1.93259839  | 0.283753693 | -6.810830794 | 9.70E-12    | 3.34E-10    |
| ENSMUSG00000037727 | 8.107107225 | -1.93233423  | 0.905559403 | -2.133856954 | 0.032854492 | 0.110228141 |
| ENSMUSG00000102652 | 16.03972496 | -1.931913662 | 0.631895073 | -3.057333006 | 0.00223316  | 0.012898655 |
| ENSMUSG00000026471 | 12.78493344 | -1.931045309 | 0.862290954 | -2.239435888 | 0.025127568 | 0.089401708 |
| ENSMUSG00000103616 | 49.48611324 | -1.929802265 | 0.415357793 | -4.646120281 | 3.38E-06    | 4.51E-05    |
| ENSMUSG00000086187 | 215.3570144 | -1.92923023  | 0.199264857 | -9.681738448 | 3.61E-22    | 3.48E-20    |
| ENSMUSG00000063296 | 418.2278046 | -1.923302996 | 0.20318492  | -9.46577628  | 2.91E-21    | 2.61E-19    |
| ENSMUSG00000070999 | 27.18179648 | -1.923001951 | 0.529011642 | -3.635084372 | 0.00027789  | 0.002229215 |
| ENSMUSG00000018507 | 120.3914867 | -1.922786432 | 0.252329397 | -7.620144362 | 2.53E-14    | 1.17E-12    |
| ENSMUSG00000032936 | 29.90710456 | -1.920472521 | 0.570238589 | -3.367840335 | 0.000757595 | 0.005253457 |
| ENSMUSG00000003849 | 432.0089335 | -1.919383728 | 0.176468047 | -10.8766644  | 1.49E-27    | 2.06E-25    |
| ENSMUSG00000086872 | 14.57473631 | -1.918549167 | 0.648347707 | -2.959136196 | 0.003085027 | 0.016821318 |
| ENSMUSG00000084837 | 31.46829979 | -1.917747249 | 0.522748851 | -3.668582428 | 0.000243899 | 0.001990191 |
| ENSMUSG00000022816 | 864.8492905 | -1.916223404 | 0.190286328 | -10.07021065 | 7.48E-24    | 8.18E-22    |
| ENSMUSG00000104211 | 9.553703683 | -1.914740226 | 0.852369972 | -2.246372218 | 0.024680176 | 0.088133324 |

|                    |             |              |             |              |             |             |
|--------------------|-------------|--------------|-------------|--------------|-------------|-------------|
| ENSMUSG00000016982 | 9.930580596 | -1.913614748 | 0.905111735 | -2.114230402 | 0.034495593 | 0.114222157 |
| ENSMUSG00000021492 | 14.51845824 | -1.909861163 | 0.68895168  | -2.772126432 | 0.00556914  | 0.027052362 |
| ENSMUSG00000109560 | 34.11551865 | -1.909260465 | 0.49198975  | -3.880691551 | 0.00010416  | 0.000949272 |
| ENSMUSG00000063522 | 17.51986895 | -1.906343893 | 0.947227123 | -2.012552056 | 0.044161775 | 0.137857187 |
| ENSMUSG00000042751 | 36.62779141 | -1.903861154 | 0.617273576 | -3.084306908 | 0.00204027  | 0.011958193 |
| ENSMUSG00000108660 | 15.21027551 | -1.901877478 | 0.634441241 | -2.997720442 | 0.002720071 | 0.015196635 |
| ENSMUSG00000099276 | 45.51119702 | -1.901688424 | 0.409497443 | -4.643956769 | 3.42E-06    | 4.55E-05    |
| ENSMUSG00000097381 | 12.00898713 | -1.898837919 | 0.778994431 | -2.437550055 | 0.014787167 | 0.058935339 |
| ENSMUSG00000044286 | 15.89339123 | -1.895008815 | 0.616782071 | -3.072412288 | 0.002123362 | 0.012366963 |
| ENSMUSG00000032338 | 33.94030533 | -1.889492087 | 0.483570522 | -3.907376484 | 9.33E-05    | 0.00086303  |
| ENSMUSG00000101061 | 20.22178063 | -1.885311045 | 0.632338863 | -2.981488496 | 0.002868508 | 0.015850001 |
| ENSMUSG00000048981 | 28.39374457 | -1.884467619 | 0.468135832 | -4.025471859 | 5.69E-05    | 0.000560593 |
| ENSMUSG00000047117 | 7.001822895 | -1.884308048 | 0.935607677 | -2.013993787 | 0.044010186 | 0.137480201 |
| ENSMUSG00000040703 | 1269.738157 | -1.884091592 | 0.202216063 | -9.317220216 | 1.19E-20    | 1.01E-18    |
| ENSMUSG00000040680 | 40.79109024 | -1.882340156 | 0.401256952 | -4.691109146 | 2.72E-06    | 3.72E-05    |
| ENSMUSG00000074704 | 7.759152895 | -1.879862956 | 0.92122543  | -2.040611228 | 0.041289485 | 0.131205017 |
| ENSMUSG00000040722 | 1521.379687 | -1.872484035 | 0.160801156 | -11.64471752 | 2.44E-31    | 4.69E-29    |
| ENSMUSG00000098197 | 190.5679132 | -1.863647356 | 0.23122828  | -8.05977259  | 7.64E-16    | 4.13E-14    |
| ENSMUSG00000053693 | 128.2238955 | -1.862312778 | 0.246896682 | -7.542882975 | 4.60E-14    | 2.07E-12    |
| ENSMUSG00000034739 | 83.74699023 | -1.861817244 | 0.351807018 | -5.292154932 | 1.21E-07    | 2.23E-06    |
| ENSMUSG00000074647 | 43.42889652 | -1.856413292 | 0.551689207 | -3.364962138 | 0.000765542 | 0.005294844 |
| ENSMUSG00000042976 | 24.56129424 | -1.855028079 | 0.556970485 | -3.330568007 | 0.00086669  | 0.005910719 |
| ENSMUSG00000050071 | 57.12759262 | -1.854962601 | 0.346585678 | -5.352104026 | 8.69E-08    | 1.66E-06    |
| ENSMUSG00000030413 | 3110.034059 | -1.852518635 | 0.187551079 | -9.877408569 | 5.22E-23    | 5.31E-21    |
| ENSMUSG00000040471 | 990.9079334 | -1.850223448 | 0.138733085 | -13.33656965 | 1.42E-40    | 4.39E-38    |
| ENSMUSG00000021337 | 73.41443018 | -1.848078432 | 0.315242351 | -5.862405301 | 4.56E-09    | 1.08E-07    |
| ENSMUSG00000058613 | 16.88718876 | -1.84336192  | 0.627958119 | -2.935485447 | 0.003330262 | 0.017861515 |
| ENSMUSG00000108518 | 11.7436804  | -1.842941772 | 0.741735056 | -2.4846362   | 0.012968389 | 0.053075434 |
| ENSMUSG00000066952 | 13.95398167 | -1.841054506 | 0.682394994 | -2.697930848 | 0.006977193 | 0.032531547 |

|                    |             |              |             |              |             |             |
|--------------------|-------------|--------------|-------------|--------------|-------------|-------------|
| ENSMUSG00000078964 | 49.61570292 | -1.840416487 | 0.397807907 | -4.626394938 | 3.72E-06    | 4.93E-05    |
| ENSMUSG00000037477 | 105.5683416 | -1.840242895 | 0.326630184 | -5.634025841 | 1.76E-08    | 3.76E-07    |
| ENSMUSG00000056508 | 249.8168927 | -1.840202839 | 0.202808667 | -9.073590701 | 1.15E-19    | 8.98E-18    |
| ENSMUSG00000084211 | 9.877155741 | -1.838219887 | 0.883209052 | -2.081296475 | 0.037406778 | 0.121463097 |
| ENSMUSG00000086322 | 13.97488187 | -1.836062525 | 0.761205256 | -2.412046569 | 0.015863255 | 0.06218819  |
| ENSMUSG00000115834 | 24.23435015 | -1.835671201 | 0.556425549 | -3.299041899 | 0.000970154 | 0.006477668 |
| ENSMUSG00000000805 | 279.9092995 | -1.835173008 | 0.298655734 | -6.144777416 | 8.01E-10    | 2.13E-08    |
| ENSMUSG00000062444 | 19.47976402 | -1.831688914 | 0.631400676 | -2.900992956 | 0.003719822 | 0.019473183 |
| ENSMUSG00000047636 | 7.680644995 | -1.829853739 | 0.916480147 | -1.996610342 | 0.045867529 | 0.141910621 |
| ENSMUSG00000038146 | 60.71639802 | -1.827410568 | 0.366127245 | -4.991189797 | 6.00E-07    | 9.41E-06    |
| ENSMUSG00000051498 | 10.01881386 | -1.823526896 | 0.799075846 | -2.282044822 | 0.022486694 | 0.081846869 |
| ENSMUSG00000029706 | 89.14386319 | -1.821675678 | 0.390374204 | -4.666485791 | 3.06E-06    | 4.14E-05    |
| ENSMUSG00000078776 | 70.42332793 | -1.814544823 | 0.324888055 | -5.585138623 | 2.34E-08    | 4.88E-07    |
| ENSMUSG00000097471 | 18.48415064 | -1.814159258 | 0.595055706 | -3.048721727 | 0.002298172 | 0.013195229 |
| ENSMUSG00000031372 | 18.26386202 | -1.813604126 | 0.606611225 | -2.989730574 | 0.002792236 | 0.015516985 |
| ENSMUSG00000115575 | 19.76791344 | -1.811711595 | 0.606348527 | -2.987904671 | 0.002808972 | 0.015590561 |
| ENSMUSG00000024793 | 83.68598952 | -1.811482121 | 0.285258784 | -6.350311452 | 2.15E-10    | 6.21E-09    |
| ENSMUSG00000114593 | 19.90463496 | -1.810304003 | 0.596312607 | -3.035830505 | 0.002398742 | 0.013667434 |
| ENSMUSG00000047773 | 28.29241878 | -1.808647739 | 0.507390823 | -3.564604749 | 0.000364405 | 0.002827625 |
| ENSMUSG00000085327 | 24.9290473  | -1.807839131 | 0.611004049 | -2.958800577 | 0.003088389 | 0.016821512 |
| ENSMUSG00000076434 | 41.14231973 | -1.80532695  | 0.469133901 | -3.84821252  | 0.000118983 | 0.001063075 |
| ENSMUSG00000091890 | 41.92397075 | -1.800251667 | 0.421375382 | -4.272322832 | 1.93E-05    | 0.000215165 |
| ENSMUSG00000082318 | 89.77627566 | -1.798631217 | 0.310073763 | -5.800655941 | 6.61E-09    | 1.52E-07    |
| ENSMUSG00000031842 | 453.4887772 | -1.798495674 | 0.230435656 | -7.804762975 | 5.96E-15    | 2.95E-13    |
| ENSMUSG00000022483 | 10.63014926 | -1.795911885 | 0.856736362 | -2.096224655 | 0.036062267 | 0.118303121 |
| ENSMUSG00000110507 | 8.495654144 | -1.795609136 | 0.914916059 | -1.962594402 | 0.049693322 | 0.150469894 |
| ENSMUSG00000027524 | 38.35727505 | -1.794797752 | 0.435716179 | -4.119190058 | 3.80E-05    | 0.00039182  |
| ENSMUSG00000090256 | 8.979996394 | -1.793673834 | 0.839224669 | -2.137298748 | 0.032573701 | 0.109483963 |
| ENSMUSG00000090658 | 11.18789741 | -1.793004713 | 0.809637761 | -2.214576444 | 0.02678915  | 0.094053029 |

|                    |             |              |             |              |             |             |
|--------------------|-------------|--------------|-------------|--------------|-------------|-------------|
| ENSMUSG00000035638 | 12.84307359 | -1.792398538 | 0.690679957 | -2.595121692 | 0.009455743 | 0.041510341 |
| ENSMUSG00000052373 | 666.3428051 | -1.792377904 | 0.210614597 | -8.510226398 | 1.74E-17    | 1.12E-15    |
| ENSMUSG00000001930 | 156.9646165 | -1.792062429 | 0.226439526 | -7.914088416 | 2.49E-15    | 1.29E-13    |
| ENSMUSG00000084990 | 28.06251832 | -1.791213988 | 0.489218549 | -3.661377909 | 0.000250862 | 0.002035838 |
| ENSMUSG00000052496 | 58.13727913 | -1.790419613 | 0.373102742 | -4.798730789 | 1.60E-06    | 2.31E-05    |
| ENSMUSG00000086424 | 17.38341994 | -1.788738874 | 0.62441189  | -2.864677791 | 0.004174337 | 0.021429995 |
| ENSMUSG00000007888 | 78.96680363 | -1.787835564 | 0.408077753 | -4.381114999 | 1.18E-05    | 0.000138365 |
| ENSMUSG00000026546 | 94.34978966 | -1.787418761 | 0.34881116  | -5.124316435 | 2.99E-07    | 5.06E-06    |
| ENSMUSG00000086721 | 13.67173492 | -1.786848146 | 0.768310926 | -2.325683633 | 0.020035434 | 0.074542913 |
| ENSMUSG00000011008 | 1293.776548 | -1.78437297  | 0.127552364 | -13.98933675 | 1.81E-44    | 6.62E-42    |
| ENSMUSG00000100629 | 13.86419126 | -1.783879888 | 0.848308675 | -2.102866493 | 0.035477442 | 0.11663514  |
| ENSMUSG00000013921 | 16.3701346  | -1.783302705 | 0.626068638 | -2.848414052 | 0.004393772 | 0.022309997 |
| ENSMUSG00000036067 | 10.52462759 | -1.783223106 | 0.766696392 | -2.325853003 | 0.020026394 | 0.07452171  |
| ENSMUSG00000114791 | 7.448735553 | -1.782036056 | 0.890726274 | -2.000655093 | 0.045429572 | 0.140946701 |
| ENSMUSG00000002384 | 56.04256798 | -1.781960071 | 0.358591893 | -4.969326147 | 6.72E-07    | 1.05E-05    |
| ENSMUSG00000112429 | 8.934849027 | -1.779514137 | 0.835019386 | -2.131105178 | 0.033080478 | 0.110637034 |
| ENSMUSG00000035863 | 42.47860012 | -1.778885103 | 0.445462777 | -3.993341741 | 6.51E-05    | 0.000634293 |
| ENSMUSG00000027457 | 536.2143231 | -1.778633296 | 0.174596807 | -10.18708947 | 2.26E-24    | 2.56E-22    |
| ENSMUSG00000089664 | 8.158634792 | -1.77782952  | 0.872800607 | -2.036925164 | 0.041657542 | 0.132092257 |
| ENSMUSG00000060470 | 33.33731032 | -1.776137976 | 0.560851033 | -3.16686227  | 0.001540933 | 0.009487671 |
| ENSMUSG00000043088 | 114.6692901 | -1.775224033 | 0.29796327  | -5.957861964 | 2.56E-09    | 6.30E-08    |
| ENSMUSG00000021798 | 502.3657906 | -1.773621356 | 0.139531417 | -12.71126888 | 5.12E-37    | 1.34E-34    |
| ENSMUSG00000026430 | 1158.308807 | -1.773573468 | 0.155174477 | -11.42954374 | 2.98E-30    | 5.07E-28    |
| ENSMUSG00000075524 | 11.21518607 | -1.773065303 | 0.784994107 | -2.258698871 | 0.023902123 | 0.085905115 |
| ENSMUSG00000022676 | 39.65791377 | -1.771927119 | 0.499565822 | -3.546934242 | 0.000389742 | 0.002992812 |
| ENSMUSG00000070348 | 4928.118414 | -1.771286653 | 0.172376823 | -10.27566594 | 9.07E-25    | 1.07E-22    |
| ENSMUSG00000010660 | 346.1256095 | -1.771134815 | 0.215342624 | -8.224729432 | 1.96E-16    | 1.11E-14    |
| ENSMUSG00000049134 | 58.36815745 | -1.767716996 | 0.379092064 | -4.663028234 | 3.12E-06    | 4.20E-05    |
| ENSMUSG00000023235 | 6421.580458 | -1.763716183 | 0.175647641 | -10.04121757 | 1.00E-23    | 1.08E-21    |

|                     |             |              |             |              |             |             |
|---------------------|-------------|--------------|-------------|--------------|-------------|-------------|
| ENSMUSG00000086943  | 8.046123751 | -1.763375316 | 0.870771679 | -2.025071967 | 0.042859975 | 0.134736439 |
| ENSMUSG00000037031  | 2655.45409  | -1.763250101 | 0.15764878  | -11.18467332 | 4.85E-29    | 7.78E-27    |
| ENSMUSG00000006469  | 11.21439172 | -1.762449562 | 0.758802697 | -2.322671716 | 0.020196795 | 0.075055611 |
| ENSMUSG00000000197  | 10.09823787 | -1.761502683 | 0.842493397 | -2.090820759 | 0.036544135 | 0.119474101 |
| ENSMUSG000000021904 | 33.14863212 | -1.759468603 | 0.570188966 | -3.085764034 | 0.002030299 | 0.01192499  |
| ENSMUSG000000044361 | 100.055775  | -1.758436083 | 0.326594697 | -5.384153805 | 7.28E-08    | 1.41E-06    |
| ENSMUSG000000035246 | 40.88305425 | -1.757977827 | 0.426491623 | -4.121951603 | 3.76E-05    | 0.000388048 |
| ENSMUSG000000047361 | 8.771871472 | -1.757114969 | 0.815584424 | -2.154424382 | 0.031206906 | 0.105590829 |
| ENSMUSG000000078872 | 13.89109685 | -1.756686372 | 0.674367549 | -2.604939065 | 0.00918906  | 0.040625732 |
| ENSMUSG000000034872 | 40.48239487 | -1.756571521 | 0.459519432 | -3.82262729  | 0.000132037 | 0.001165241 |
| ENSMUSG000000078192 | 8.725625517 | -1.75501473  | 0.828159638 | -2.119174431 | 0.034075728 | 0.113100583 |
| ENSMUSG000000046215 | 11.84103458 | -1.753926915 | 0.730976745 | -2.399429157 | 0.016420657 | 0.063833726 |
| ENSMUSG000000003070 | 269.0278374 | -1.752394652 | 0.247897811 | -7.069020266 | 1.56E-12    | 5.91E-11    |
| ENSMUSG000000090317 | 49.31177117 | -1.75166925  | 0.36901972  | -4.746817464 | 2.07E-06    | 2.90E-05    |
| ENSMUSG000000019900 | 316.3982778 | -1.750056113 | 0.245718486 | -7.122199637 | 1.06E-12    | 4.14E-11    |
| ENSMUSG000000086564 | 26.51598282 | -1.749961101 | 0.553981453 | -3.158880307 | 0.001583765 | 0.009721868 |
| ENSMUSG000000028137 | 279.3675673 | -1.749236543 | 0.235121048 | -7.439727581 | 1.01E-13    | 4.34E-12    |
| ENSMUSG000000098109 | 14.63808445 | -1.744837908 | 0.655872929 | -2.660329205 | 0.007806431 | 0.035652512 |
| ENSMUSG000000021303 | 65.80428794 | -1.7430252   | 0.313989452 | -5.551222149 | 2.84E-08    | 5.80E-07    |
| ENSMUSG000000030401 | 65.97809922 | -1.742155113 | 0.362465526 | -4.806402225 | 1.54E-06    | 2.23E-05    |
| ENSMUSG000000037166 | 57.34894662 | -1.740287331 | 0.360525366 | -4.827087066 | 1.39E-06    | 2.02E-05    |
| ENSMUSG000000030134 | 14.0617125  | -1.737791352 | 0.695889073 | -2.497224656 | 0.012516963 | 0.05155009  |
| ENSMUSG000000047021 | 42.42234327 | -1.736813485 | 0.399238445 | -4.350316229 | 1.36E-05    | 0.000157405 |
| ENSMUSG000000021256 | 14.7642473  | -1.736686148 | 0.664799607 | -2.61234533  | 0.008992337 | 0.039868412 |
| ENSMUSG000000018581 | 73.17507886 | -1.735662487 | 0.35112668  | -4.943123341 | 7.69E-07    | 1.19E-05    |
| ENSMUSG000000052921 | 19.82264098 | -1.735167215 | 0.610107948 | -2.844033124 | 0.004454642 | 0.022542084 |
| ENSMUSG000000018411 | 153.3029849 | -1.732714504 | 0.261693244 | -6.62116637  | 3.56E-11    | 1.15E-09    |
| ENSMUSG000000071265 | 13.68593505 | -1.729748589 | 0.740285813 | -2.336595622 | 0.01946022  | 0.072859663 |
| ENSMUSG000000091898 | 18.84529114 | -1.728875537 | 0.626345402 | -2.760259006 | 0.005775555 | 0.02787893  |

|                    |             |              |             |              |             |             |
|--------------------|-------------|--------------|-------------|--------------|-------------|-------------|
| ENSMUSG00000048148 | 34.92551821 | -1.727915817 | 0.527836222 | -3.273583254 | 0.001061931 | 0.006996196 |
| ENSMUSG00000099988 | 33.00866534 | -1.72720025  | 0.468288221 | -3.688327344 | 0.000225733 | 0.001863782 |
| ENSMUSG00000010505 | 254.6720573 | -1.726968171 | 0.283993637 | -6.081010093 | 1.19E-09    | 3.08E-08    |
| ENSMUSG00000084881 | 15.03647468 | -1.72669054  | 0.65588217  | -2.632623081 | 0.008472832 | 0.038064589 |
| ENSMUSG00000092483 | 12.91174289 | -1.7266227   | 0.709855889 | -2.43235666  | 0.015000928 | 0.059568321 |
| ENSMUSG00000100396 | 12.9369009  | -1.725376187 | 0.686899791 | -2.511830996 | 0.012010659 | 0.049990615 |
| ENSMUSG00000040136 | 98.41749089 | -1.724471409 | 0.324062874 | -5.321409979 | 1.03E-07    | 1.92E-06    |
| ENSMUSG00000102980 | 97.54309369 | -1.72373451  | 0.268767488 | -6.413478505 | 1.42E-10    | 4.21E-09    |
| ENSMUSG00000097854 | 9.443777316 | -1.721528832 | 0.835825256 | -2.059675536 | 0.03942957  | 0.126703002 |
| ENSMUSG00000056380 | 9.427856202 | -1.719719757 | 0.784722892 | -2.191499412 | 0.028415672 | 0.098262972 |
| ENSMUSG00000058183 | 10.79826397 | -1.718169658 | 0.747052412 | -2.29993188  | 0.02145208  | 0.078827291 |
| ENSMUSG00000039330 | 36.84625251 | -1.71486005  | 0.421033641 | -4.072976317 | 4.64E-05    | 0.00047094  |
| ENSMUSG00000007946 | 17.64459518 | -1.71351558  | 0.732550929 | -2.339107783 | 0.019329856 | 0.072522732 |
| ENSMUSG00000038599 | 257.195198  | -1.713108201 | 0.25241339  | -6.786914919 | 1.15E-11    | 3.91E-10    |
| ENSMUSG00000094634 | 29.47525798 | -1.712676727 | 0.456543182 | -3.751401389 | 0.000175849 | 0.001495264 |
| ENSMUSG00000038239 | 267.6942449 | -1.712638398 | 0.25641503  | -6.67916541  | 2.40E-11    | 7.92E-10    |
| ENSMUSG00000086598 | 135.9688717 | -1.711470374 | 0.251755502 | -6.798144879 | 1.06E-11    | 3.62E-10    |
| ENSMUSG00000082969 | 9.404672176 | -1.709162866 | 0.826164776 | -2.068791744 | 0.038565634 | 0.124573029 |
| ENSMUSG00000092210 | 102.2217873 | -1.708376325 | 0.422428558 | -4.044178102 | 5.25E-05    | 0.00052345  |
| ENSMUSG00000035835 | 20.30036428 | -1.705715715 | 0.568204803 | -3.00193822  | 0.002682666 | 0.015031693 |
| ENSMUSG00000102615 | 207.9109526 | -1.70542247  | 0.270599819 | -6.302378447 | 2.93E-10    | 8.28E-09    |
| ENSMUSG00000113591 | 13.56669469 | -1.705181823 | 0.725823343 | -2.349306949 | 0.018808395 | 0.071020319 |
| ENSMUSG00000026959 | 21.73005394 | -1.704995083 | 0.678432023 | -2.513140631 | 0.011966162 | 0.04986737  |
| ENSMUSG00000043986 | 23.09240487 | -1.703597674 | 0.541185317 | -3.147900765 | 0.001644475 | 0.010022804 |
| ENSMUSG00000028940 | 46.37220548 | -1.70268497  | 0.444539514 | -3.830221873 | 0.000128028 | 0.001137962 |
| ENSMUSG00000033597 | 42.10462493 | -1.701084372 | 0.489782213 | -3.473144448 | 0.000514398 | 0.003799801 |
| ENSMUSG00000068154 | 393.2164682 | -1.699564868 | 0.230533938 | -7.372297905 | 1.68E-13    | 6.99E-12    |
| ENSMUSG00000001739 | 9480.171404 | -1.699242996 | 0.118135458 | -14.38385239 | 6.54E-47    | 2.51E-44    |
| ENSMUSG00000069299 | 9.926601751 | -1.697137101 | 0.852018472 | -1.991901768 | 0.046381837 | 0.143045408 |

|                    |             |              |             |              |             |             |
|--------------------|-------------|--------------|-------------|--------------|-------------|-------------|
| ENSMUSG00000041556 | 20.0671601  | -1.697097994 | 0.610772299 | -2.778609959 | 0.005459203 | 0.026651859 |
| ENSMUSG00000107634 | 11.26938038 | -1.69627301  | 0.775111198 | -2.18842537  | 0.028638632 | 0.09878436  |
| ENSMUSG00000008734 | 35.41196334 | -1.693867914 | 0.468838451 | -3.612903142 | 0.000302788 | 0.002408157 |
| ENSMUSG00000085017 | 18.91335248 | -1.69243839  | 0.695945339 | -2.431855341 | 0.015021705 | 0.059582637 |
| ENSMUSG00000055805 | 46.45570711 | -1.691491236 | 0.37124941  | -4.556212588 | 5.21E-06    | 6.69E-05    |
| ENSMUSG00000030402 | 130.9322555 | -1.691031187 | 0.306201108 | -5.522616161 | 3.34E-08    | 6.76E-07    |
| ENSMUSG00000090370 | 46.56119329 | -1.68763161  | 0.390109349 | -4.326047588 | 1.52E-05    | 0.000174382 |
| ENSMUSG00000097680 | 65.44136827 | -1.685888255 | 0.322779064 | -5.223040912 | 1.76E-07    | 3.15E-06    |
| ENSMUSG00000024968 | 335.3355529 | -1.684202734 | 0.193279558 | -8.713817161 | 2.94E-18    | 2.05E-16    |
| ENSMUSG00000048489 | 13.37560305 | -1.683152297 | 0.701575653 | -2.399103062 | 0.016435288 | 0.063843122 |
| ENSMUSG00000047986 | 21.38079924 | -1.682825536 | 0.55008858  | -3.059190098 | 0.002219363 | 0.012831709 |
| ENSMUSG00000029718 | 39.73279098 | -1.682339524 | 0.432582403 | -3.889061395 | 0.000100633 | 0.000922025 |
| ENSMUSG00000043155 | 289.7128874 | -1.680836635 | 0.237325301 | -7.082416541 | 1.42E-12    | 5.39E-11    |
| ENSMUSG00000036298 | 345.439043  | -1.680342852 | 0.197414977 | -8.511729325 | 1.71E-17    | 1.11E-15    |
| ENSMUSG00000056529 | 13.44335718 | -1.679051302 | 0.652758008 | -2.572241599 | 0.010104235 | 0.043711843 |
| ENSMUSG00000110618 | 25.50399806 | -1.678777307 | 0.516335816 | -3.251328406 | 0.001148671 | 0.007455329 |
| ENSMUSG00000100658 | 109.1029423 | -1.678053482 | 0.272154943 | -6.165801959 | 7.01E-10    | 1.88E-08    |
| ENSMUSG00000108934 | 11.98858697 | -1.676275622 | 0.806125091 | -2.079423703 | 0.037578424 | 0.121913941 |
| ENSMUSG00000025129 | 61.1035957  | -1.673624288 | 0.334688674 | -5.000540556 | 5.72E-07    | 9.04E-06    |
| ENSMUSG00000112581 | 15.02868322 | -1.673334057 | 0.683817619 | -2.447047297 | 0.014403194 | 0.057750022 |
| ENSMUSG00000097542 | 8.441087899 | -1.672762186 | 0.842340134 | -1.985851225 | 0.047049846 | 0.144625584 |
| ENSMUSG00000064080 | 11.35870658 | -1.6726971   | 0.839943653 | -1.991439658 | 0.046432573 | 0.143162285 |
| ENSMUSG00000112388 | 44.68905295 | -1.672283581 | 0.402932491 | -4.150282293 | 3.32E-05    | 0.000346948 |
| ENSMUSG00000034227 | 308.890444  | -1.668900752 | 0.601998386 | -2.772267819 | 0.005566722 | 0.027046505 |
| ENSMUSG00000038765 | 19.70886511 | -1.666560969 | 0.626842465 | -2.658659968 | 0.00784521  | 0.035771012 |
| ENSMUSG00000109617 | 14.21721545 | -1.666003638 | 0.69692178  | -2.390517393 | 0.016824652 | 0.065015867 |
| ENSMUSG00000041120 | 49.31943885 | -1.665928157 | 0.391264388 | -4.257806756 | 2.06E-05    | 0.000227802 |
| ENSMUSG00000025317 | 10.60306035 | -1.664802762 | 0.776651737 | -2.143564075 | 0.032067832 | 0.108011587 |
| ENSMUSG00000042961 | 69.47525942 | -1.663454741 | 0.346908991 | -4.795075314 | 1.63E-06    | 2.35E-05    |



|                    |             |              |             |              |             |             |
|--------------------|-------------|--------------|-------------|--------------|-------------|-------------|
| ENSMUSG00000044724 | 77.40503103 | -1.663313833 | 0.347895613 | -4.78107159  | 1.74E-06    | 2.50E-05    |
| ENSMUSG00000054146 | 482.8922132 | -1.66284782  | 0.216683348 | -7.674091427 | 1.67E-14    | 7.90E-13    |
| ENSMUSG00000087651 | 72.70156013 | -1.662823713 | 0.316400706 | -5.255436167 | 1.48E-07    | 2.68E-06    |
| ENSMUSG00000035697 | 68.22881558 | -1.662522307 | 0.35499468  | -4.683231612 | 2.82E-06    | 3.85E-05    |
| ENSMUSG00000109737 | 34.02785093 | -1.6619919   | 0.480044983 | -3.462158672 | 0.000535861 | 0.003924054 |
| ENSMUSG00000021573 | 476.9844105 | -1.659139318 | 0.182337316 | -9.099285634 | 9.09E-20    | 7.24E-18    |
| ENSMUSG00000055818 | 44.28302914 | -1.657880564 | 0.380849342 | -4.3531139   | 1.34E-05    | 0.000155814 |
| ENSMUSG00000063704 | 40.87131687 | -1.657545667 | 0.48718528  | -3.402290126 | 0.000668237 | 0.004732405 |
| ENSMUSG00000099644 | 13.15892888 | -1.653388687 | 0.712646226 | -2.320069379 | 0.020337124 | 0.075438825 |
| ENSMUSG00000106843 | 13.14844203 | -1.651444282 | 0.679559397 | -2.43016915  | 0.015091778 | 0.059808929 |
| ENSMUSG00000045521 | 61.10101499 | -1.649836845 | 0.354874638 | -4.649069472 | 3.33E-06    | 4.46E-05    |
| ENSMUSG00000086712 | 208.2582908 | -1.64947803  | 0.203103404 | -8.121370693 | 4.61E-16    | 2.53E-14    |
| ENSMUSG00000107879 | 12.5576747  | -1.64857694  | 0.786017395 | -2.097379716 | 0.035959975 | 0.118071762 |
| ENSMUSG00000091017 | 1774.404662 | -1.648473552 | 0.198160887 | -8.318864403 | 8.88E-17    | 5.23E-15    |
| ENSMUSG00000115458 | 22.96251747 | -1.646612995 | 0.563888648 | -2.920103111 | 0.003499156 | 0.018557592 |
| ENSMUSG00000072902 | 39.66472405 | -1.646158908 | 0.514426735 | -3.199987082 | 0.001374337 | 0.008621406 |
| ENSMUSG00000024575 | 21.01609314 | -1.645318294 | 0.573027768 | -2.871271492 | 0.004088242 | 0.021058872 |
| ENSMUSG00000022026 | 313266.6778 | -1.640923135 | 0.191608926 | -8.563918047 | 1.09E-17    | 7.22E-16    |
| ENSMUSG00000097559 | 815.2869258 | -1.640049158 | 0.206757379 | -7.932240035 | 2.15E-15    | 1.12E-13    |
| ENSMUSG00000074628 | 30.1314686  | -1.638569549 | 0.57969392  | -2.826611585 | 0.004704335 | 0.023596801 |
| ENSMUSG00000074652 | 90.83874636 | -1.633573392 | 0.289714042 | -5.638571669 | 1.71E-08    | 3.67E-07    |
| ENSMUSG00000041566 | 185.3137644 | -1.633460314 | 0.239050158 | -6.833127928 | 8.31E-12    | 2.88E-10    |
| ENSMUSG00000028480 | 549.8580663 | -1.632821566 | 0.1787994   | -9.132142297 | 6.72E-20    | 5.41E-18    |
| ENSMUSG00000018566 | 48.26709707 | -1.632750777 | 0.403718254 | -4.044282768 | 5.25E-05    | 0.00052345  |
| ENSMUSG00000013158 | 14.30521798 | -1.630752853 | 0.658977152 | -2.474672829 | 0.013335828 | 0.054247688 |
| ENSMUSG00000045903 | 14.43308646 | -1.63007636  | 0.63222275  | -2.578326009 | 0.009928028 | 0.043142042 |
| ENSMUSG00000046811 | 15.92386874 | -1.62971003  | 0.670056214 | -2.432198964 | 0.015007461 | 0.059573048 |
| ENSMUSG00000025380 | 162.1263486 | -1.628780924 | 0.271687516 | -5.995052517 | 2.03E-09    | 5.09E-08    |
| ENSMUSG00000069755 | 374.0073653 | -1.625648022 | 0.259904777 | -6.254783156 | 3.98E-10    | 1.10E-08    |

|                    |             |              |             |              |             |             |
|--------------------|-------------|--------------|-------------|--------------|-------------|-------------|
| ENSMUSG00000101940 | 13.11587678 | -1.623722928 | 0.673527616 | -2.410774092 | 0.015918705 | 0.062346864 |
| ENSMUSG00000106969 | 25.3940226  | -1.623265637 | 0.496493167 | -3.269462187 | 0.001077521 | 0.00708217  |
| ENSMUSG00000020331 | 251.5577417 | -1.621993794 | 0.212279141 | -7.640853403 | 2.16E-14    | 1.01E-12    |
| ENSMUSG00000105896 | 70.76319231 | -1.620990088 | 0.347681077 | -4.662290224 | 3.13E-06    | 4.22E-05    |
| ENSMUSG00000032584 | 2387.269872 | -1.619312813 | 0.129373256 | -12.5165963  | 6.06E-36    | 1.48E-33    |
| ENSMUSG00000079906 | 14.59287646 | -1.619179897 | 0.694588353 | -2.331135973 | 0.019746191 | 0.073700386 |
| ENSMUSG00000038540 | 27.46928499 | -1.617589844 | 0.465068115 | -3.478178337 | 0.000504834 | 0.003742786 |
| ENSMUSG00000003352 | 929.7806073 | -1.617526317 | 0.123764352 | -13.06940395 | 4.92E-39    | 1.45E-36    |
| ENSMUSG00000051606 | 105.0767804 | -1.616125356 | 0.306172393 | -5.278481645 | 1.30E-07    | 2.39E-06    |
| ENSMUSG00000004655 | 8846.788949 | -1.614797641 | 0.176526967 | -9.147597492 | 5.82E-20    | 4.70E-18    |
| ENSMUSG00000065549 | 40.22189287 | -1.614208357 | 0.387690041 | -4.163657009 | 3.13E-05    | 0.0003293   |
| ENSMUSG00000103746 | 12.15723652 | -1.612023913 | 0.747980523 | -2.155168303 | 0.031148666 | 0.105457175 |
| ENSMUSG00000046487 | 12.57879865 | -1.61013841  | 0.750705898 | -2.144832503 | 0.031966241 | 0.107750779 |
| ENSMUSG00000033327 | 13.29094453 | -1.60923779  | 0.771186358 | -2.08670417  | 0.036914884 | 0.120268639 |
| ENSMUSG00000046613 | 598.8959702 | -1.607976264 | 0.247477992 | -6.497451557 | 8.17E-11    | 2.51E-09    |
| ENSMUSG00000058740 | 14.51562031 | -1.607877845 | 0.725943502 | -2.21488014  | 0.026768293 | 0.093994598 |
| ENSMUSG00000062184 | 12.31907269 | -1.60772415  | 0.701248198 | -2.29266065  | 0.02186755  | 0.080011194 |
| ENSMUSG00000030223 | 462.7403084 | -1.607211101 | 0.166037132 | -9.679829331 | 3.67E-22    | 3.53E-20    |
| ENSMUSG00000102813 | 13.14673653 | -1.604134044 | 0.7005472   | -2.289830069 | 0.022031169 | 0.080464642 |
| ENSMUSG00000024039 | 323.7182842 | -1.601660244 | 0.245443244 | -6.525582924 | 6.77E-11    | 2.09E-09    |
| ENSMUSG00000085944 | 68.23778759 | -1.601496585 | 0.333765019 | -4.798275714 | 1.60E-06    | 2.31E-05    |
| ENSMUSG00000044312 | 509.9286112 | -1.60098383  | 0.270209376 | -5.924975125 | 3.12E-09    | 7.60E-08    |
| ENSMUSG00000026173 | 15.76511093 | -1.600656995 | 0.679671929 | -2.355043554 | 0.018520535 | 0.070135243 |
| ENSMUSG00000070823 | 50.44952093 | -1.600552592 | 0.363237032 | -4.406358526 | 1.05E-05    | 0.000124303 |
| ENSMUSG00000014609 | 38.83529343 | -1.599048494 | 0.491097573 | -3.256070855 | 0.001129656 | 0.007349022 |
| ENSMUSG00000111097 | 27.09901979 | -1.595210785 | 0.471231242 | -3.385197419 | 0.000711271 | 0.004986498 |
| ENSMUSG00000085347 | 17.52334284 | -1.594794794 | 0.617322986 | -2.5834042   | 0.009783063 | 0.042645053 |
| ENSMUSG00000075284 | 1053.054841 | -1.593939354 | 0.133274097 | -11.9598586  | 5.77E-33    | 1.19E-30    |
| ENSMUSG00000087028 | 38.58533363 | -1.592913471 | 0.395359534 | -4.029025059 | 5.60E-05    | 0.000552921 |

|                    |             |              |             |              |             |             |
|--------------------|-------------|--------------|-------------|--------------|-------------|-------------|
| ENSMUSG00000085601 | 21.53697978 | -1.58875311  | 0.572148061 | -2.776821628 | 0.005489329 | 0.026781347 |
| ENSMUSG00000112501 | 288.5898529 | -1.588591073 | 0.20270665  | -7.83689669  | 4.62E-15    | 2.34E-13    |
| ENSMUSG00000081967 | 14.12032095 | -1.587606213 | 0.726739412 | -2.184560501 | 0.028921087 | 0.099547639 |
| ENSMUSG00000049988 | 18.13562539 | -1.586832536 | 0.631532798 | -2.512668447 | 0.011982189 | 0.04991126  |
| ENSMUSG00000084343 | 12.05604312 | -1.58523021  | 0.694959678 | -2.281039119 | 0.022546132 | 0.082023049 |
| ENSMUSG00000016763 | 39.38472454 | -1.584632658 | 0.439971669 | -3.601669761 | 0.00031618  | 0.002495974 |
| ENSMUSG00000062380 | 62.60689229 | -1.58394241  | 0.376873091 | -4.202853553 | 2.64E-05    | 0.000281914 |
| ENSMUSG00000115688 | 91.457055   | -1.582231073 | 0.27019963  | -5.855785496 | 4.75E-09    | 1.12E-07    |
| ENSMUSG00000039179 | 14.90370402 | -1.581753951 | 0.687189313 | -2.301773208 | 0.021347965 | 0.078561216 |
| ENSMUSG00000022594 | 21.53353352 | -1.579829669 | 0.586381854 | -2.694199451 | 0.007055793 | 0.032829384 |
| ENSMUSG00000047197 | 15.1755191  | -1.578812862 | 0.694012076 | -2.274906902 | 0.022911515 | 0.083015887 |
| ENSMUSG00000047443 | 1283.074937 | -1.578566885 | 0.118272851 | -13.34682369 | 1.24E-40    | 3.88E-38    |
| ENSMUSG00000099139 | 20.62321991 | -1.578275711 | 0.572340476 | -2.757581853 | 0.005823063 | 0.028071797 |
| ENSMUSG00000005803 | 1110.347812 | -1.578101542 | 0.159703426 | -9.881450752 | 5.01E-23    | 5.13E-21    |
| ENSMUSG00000081965 | 38.16096043 | -1.576732427 | 0.4118238   | -3.828657853 | 0.000128844 | 0.00114401  |
| ENSMUSG00000108129 | 16.70925207 | -1.576342208 | 0.596542179 | -2.642465635 | 0.008230482 | 0.037200643 |
| ENSMUSG00000029059 | 845.4731313 | -1.57418278  | 0.181365947 | -8.679593977 | 3.97E-18    | 2.76E-16    |
| ENSMUSG00000011486 | 11.65332339 | -1.573188314 | 0.796662146 | -1.974724569 | 0.048299413 | 0.147410047 |
| ENSMUSG00000031075 | 54.72053125 | -1.572933954 | 0.342810813 | -4.588344051 | 4.47E-06    | 5.85E-05    |
| ENSMUSG00000024011 | 11.51037195 | -1.572022198 | 0.718088679 | -2.189175576 | 0.028584081 | 0.098692304 |
| ENSMUSG00000066721 | 11.30650341 | -1.571578675 | 0.7865683   | -1.998019339 | 0.045714564 | 0.14161418  |
| ENSMUSG00000081829 | 20.10848067 | -1.567981722 | 0.552755959 | -2.836661817 | 0.004558787 | 0.02298045  |
| ENSMUSG00000090071 | 21.21927056 | -1.567161157 | 0.562112427 | -2.787985253 | 0.005303696 | 0.026035157 |
| ENSMUSG00000060962 | 12.62200048 | -1.567031714 | 0.73529533  | -2.131159619 | 0.033075995 | 0.110637034 |
| ENSMUSG00000028950 | 12.1742997  | -1.566897924 | 0.721566681 | -2.171522001 | 0.029891736 | 0.101991371 |
| ENSMUSG00000036766 | 21.30210765 | -1.566089338 | 0.570223282 | -2.746449305 | 0.00602442  | 0.028818228 |
| ENSMUSG00000024366 | 217.7253932 | -1.564963334 | 0.268607414 | -5.826210499 | 5.67E-09    | 1.32E-07    |
| ENSMUSG00000085376 | 17.53481945 | -1.564886439 | 0.69909581  | -2.238443451 | 0.025192151 | 0.089602897 |
| ENSMUSG00000030587 | 2325.434994 | -1.562971763 | 0.168829167 | -9.257711757 | 2.09E-20    | 1.74E-18    |

|                    |             |              |             |              |             |             |
|--------------------|-------------|--------------|-------------|--------------|-------------|-------------|
| ENSMUSG00000005958 | 5810.427167 | -1.562461121 | 0.104687621 | -14.92498448 | 2.27E-50    | 9.72E-48    |
| ENSMUSG00000021209 | 155.1174272 | -1.559833089 | 0.235955279 | -6.610714941 | 3.82E-11    | 1.23E-09    |
| ENSMUSG00000044522 | 16.69967519 | -1.559369363 | 0.626494658 | -2.489038562 | 0.012808907 | 0.052516734 |
| ENSMUSG00000028654 | 4407.75569  | -1.559106541 | 0.140986958 | -11.05851605 | 1.99E-28    | 2.96E-26    |
| ENSMUSG00000112682 | 16.49486085 | -1.558606093 | 0.619520797 | -2.515825296 | 0.011875403 | 0.049557142 |
| ENSMUSG00000046697 | 210.7118975 | -1.557864904 | 0.291899881 | -5.336983697 | 9.45E-08    | 1.78E-06    |
| ENSMUSG00000036185 | 17.33267149 | -1.55667093  | 0.592753424 | -2.626169444 | 0.008635182 | 0.038653267 |
| ENSMUSG00000009633 | 22.19858605 | -1.554241974 | 0.62179964  | -2.499586483 | 0.012433835 | 0.051282957 |
| ENSMUSG00000049532 | 60.51872907 | -1.553844988 | 0.348496725 | -4.458707579 | 8.25E-06    | 0.000100154 |
| ENSMUSG00000061517 | 40.09938181 | -1.552864612 | 0.548021186 | -2.833584998 | 0.004602907 | 0.023171426 |
| ENSMUSG00000014852 | 10.51520621 | -1.55184709  | 0.775551531 | -2.000959354 | 0.04539677  | 0.140883162 |
| ENSMUSG00000078630 | 45.61492395 | -1.550448449 | 0.392813843 | -3.947031082 | 7.91E-05    | 0.000748662 |
| ENSMUSG00000043621 | 143.1953597 | -1.550344066 | 0.276854033 | -5.599860864 | 2.15E-08    | 4.52E-07    |
| ENSMUSG00000094091 | 58.92974686 | -1.548233341 | 0.488462172 | -3.16960745  | 0.00152645  | 0.009414094 |
| ENSMUSG00000045775 | 742.181557  | -1.546479135 | 0.253982336 | -6.088923973 | 1.14E-09    | 2.94E-08    |
| ENSMUSG00000005202 | 11.27644654 | -1.543703229 | 0.74212577  | -2.080109992 | 0.037515445 | 0.121745045 |
| ENSMUSG00000027605 | 4301.474042 | -1.54172988  | 0.148155205 | -10.40618101 | 2.32E-25    | 2.83E-23    |
| ENSMUSG00000025743 | 34.36060625 | -1.540270462 | 0.46782046  | -3.292439284 | 0.000993223 | 0.006604018 |
| ENSMUSG00000099590 | 16.62070507 | -1.539872791 | 0.67796329  | -2.271321785 | 0.023127505 | 0.083681662 |
| ENSMUSG00000112652 | 83.52077365 | -1.537951961 | 0.33345314  | -4.612198166 | 3.98E-06    | 5.27E-05    |
| ENSMUSG00000044986 | 489.854921  | -1.537646486 | 0.204999175 | -7.500744745 | 6.35E-14    | 2.80E-12    |
| ENSMUSG00000108418 | 31.10894627 | -1.536229416 | 0.456501109 | -3.365226034 | 0.00076481  | 0.005291971 |
| ENSMUSG00000018169 | 60.34975764 | -1.535187286 | 0.383600623 | -4.002045863 | 6.28E-05    | 0.000612883 |
| ENSMUSG00000111936 | 18.48469909 | -1.535005205 | 0.595048864 | -2.57962883  | 0.009890656 | 0.042996397 |
| ENSMUSG00000042333 | 2527.056808 | -1.533922634 | 0.102000808 | -15.03833808 | 4.12E-51    | 1.84E-48    |
| ENSMUSG00000069227 | 21.99080823 | -1.533209625 | 0.573300242 | -2.674357192 | 0.007487266 | 0.034463057 |
| ENSMUSG00000040424 | 90.48119239 | -1.533205893 | 0.302334651 | -5.071221202 | 3.95E-07    | 6.49E-06    |
| ENSMUSG00000014846 | 134.9893119 | -1.530622247 | 0.325743146 | -4.698862482 | 2.62E-06    | 3.60E-05    |
| ENSMUSG00000058260 | 29.84835239 | -1.528827588 | 0.497956169 | -3.070205136 | 0.002139118 | 0.012435993 |

|                    |             |              |             |              |             |             |
|--------------------|-------------|--------------|-------------|--------------|-------------|-------------|
| ENSMUSG00000036422 | 1486.539124 | -1.528777154 | 0.113878159 | -13.42467393 | 4.33E-41    | 1.40E-38    |
| ENSMUSG00000031551 | 20.07801584 | -1.528542255 | 0.739123174 | -2.068048072 | 0.038635503 | 0.124762576 |
| ENSMUSG00000020135 | 142.5189595 | -1.52848665  | 0.345108752 | -4.428999969 | 9.47E-06    | 0.000113265 |
| ENSMUSG00000043036 | 22.22150933 | -1.52821173  | 0.52924594  | -2.887526603 | 0.003882838 | 0.02015623  |
| ENSMUSG00000022537 | 170.2661561 | -1.526831689 | 0.242339373 | -6.300386395 | 2.97E-10    | 8.37E-09    |
| ENSMUSG00000081884 | 75.81993555 | -1.525727367 | 0.312751969 | -4.87839412  | 1.07E-06    | 1.60E-05    |
| ENSMUSG00000039372 | 28.78607083 | -1.523720277 | 0.506328348 | -3.0093521   | 0.002618055 | 0.014740027 |
| ENSMUSG00000114022 | 30.05662892 | -1.521679049 | 0.497889794 | -3.056256758 | 0.002241192 | 0.012931651 |
| ENSMUSG00000057729 | 171.9613293 | -1.520624046 | 0.266241062 | -5.711455746 | 1.12E-08    | 2.47E-07    |
| ENSMUSG00000055197 | 121.2131459 | -1.519058868 | 0.265460362 | -5.722356655 | 1.05E-08    | 2.32E-07    |
| ENSMUSG00000039452 | 93.43249489 | -1.518407164 | 0.290669583 | -5.223825448 | 1.75E-07    | 3.13E-06    |
| ENSMUSG00000078486 | 88.44021678 | -1.518006776 | 0.375196548 | -4.045897505 | 5.21E-05    | 0.00052032  |
| ENSMUSG00000032591 | 28.89350002 | -1.515662969 | 0.507376512 | -2.987254896 | 0.002814949 | 0.015615965 |
| ENSMUSG00000033882 | 18.01604544 | -1.51554012  | 0.583515154 | -2.597259229 | 0.009397097 | 0.041325549 |
| ENSMUSG00000085733 | 45.53211237 | -1.515461915 | 0.395001531 | -3.836597571 | 0.000124751 | 0.001111048 |
| ENSMUSG00000007989 | 57.10059509 | -1.514819603 | 0.510853714 | -2.965270804 | 0.003024166 | 0.016554228 |
| ENSMUSG00000050122 | 49.07904133 | -1.514248689 | 0.388833198 | -3.894340028 | 9.85E-05    | 0.000904407 |
| ENSMUSG00000070803 | 798.8767066 | -1.513736481 | 0.161810563 | -9.354991742 | 8.36E-21    | 7.14E-19    |
| ENSMUSG00000087496 | 18.59450518 | -1.513050868 | 0.621836806 | -2.433196062 | 0.014966194 | 0.059475747 |
| ENSMUSG00000026435 | 24.38211596 | -1.509159623 | 0.534803368 | -2.821896256 | 0.004774062 | 0.023904094 |
| ENSMUSG00000001025 | 95.05465516 | -1.507798446 | 0.306807719 | -4.914473637 | 8.90E-07    | 1.36E-05    |
| ENSMUSG00000086567 | 56.16367346 | -1.506600225 | 0.342593501 | -4.397632242 | 1.09E-05    | 0.000129063 |
| ENSMUSG00000031957 | 12.39674697 | -1.504600475 | 0.702381132 | -2.142142501 | 0.032182017 | 0.108281707 |
| ENSMUSG00000003271 | 289.8253586 | -1.504028012 | 0.193718523 | -7.76398656  | 8.23E-15    | 4.05E-13    |
| ENSMUSG00000041592 | 26.27485587 | -1.503207805 | 0.563435958 | -2.667930195 | 0.007632011 | 0.035006476 |
| ENSMUSG00000050132 | 26.51805498 | -1.502850936 | 0.494227323 | -3.04080909  | 0.002359434 | 0.013491727 |
| ENSMUSG00000085471 | 61.67272996 | -1.502718232 | 0.369211625 | -4.070072907 | 4.70E-05    | 0.00047555  |
| ENSMUSG00000092216 | 23.53385479 | -1.502058208 | 0.535663555 | -2.804107533 | 0.005045607 | 0.025016027 |
| ENSMUSG00000105404 | 16.82154401 | -1.501231045 | 0.643767439 | -2.331946219 | 0.019703521 | 0.073578066 |

|                    |             |              |             |              |             |             |
|--------------------|-------------|--------------|-------------|--------------|-------------|-------------|
| ENSMUSG00000097426 | 19.28101843 | -1.50073986  | 0.706113343 | -2.125352642 | 0.033557199 | 0.111833605 |
| ENSMUSG00000113876 | 24.44367458 | -1.500477486 | 0.498630385 | -3.009197854 | 0.002619385 | 0.014743791 |
| ENSMUSG00000049598 | 21.32663251 | -1.497705893 | 0.631798434 | -2.370543853 | 0.017761937 | 0.067850112 |
| ENSMUSG00000048001 | 70.30618745 | -1.489940392 | 0.330864627 | -4.503172208 | 6.69E-06    | 8.35E-05    |
| ENSMUSG00000061878 | 65.48133249 | -1.489561198 | 0.382761288 | -3.891619259 | 9.96E-05    | 0.000913858 |
| ENSMUSG00000048385 | 17.68229972 | -1.488783423 | 0.671707336 | -2.216416798 | 0.02666297  | 0.093713302 |
| ENSMUSG00000022878 | 12.27226097 | -1.488077167 | 0.733415492 | -2.028968822 | 0.042461466 | 0.133804317 |
| ENSMUSG00000002885 | 1152.228424 | -1.486301247 | 0.158199848 | -9.39508645  | 5.72E-21    | 5.02E-19    |
| ENSMUSG00000030725 | 1459.400974 | -1.486288117 | 0.130498096 | -11.38934712 | 4.73E-30    | 7.92E-28    |
| ENSMUSG00000105352 | 17.87917087 | -1.486002975 | 0.614533534 | -2.418099083 | 0.015601828 | 0.061397061 |
| ENSMUSG00000010154 | 1925.356877 | -1.485797822 | 0.156283009 | -9.507097593 | 1.96E-21    | 1.81E-19    |
| ENSMUSG00000111895 | 19.27678856 | -1.484970928 | 0.574641449 | -2.584169541 | 0.00976138  | 0.0425755   |
| ENSMUSG00000099655 | 121.3220327 | -1.484836423 | 0.270899491 | -5.481134044 | 4.23E-08    | 8.44E-07    |
| ENSMUSG00000104158 | 23.67114563 | -1.484045066 | 0.497287507 | -2.98427981  | 0.002842467 | 0.015741211 |
| ENSMUSG00000049350 | 2471.312101 | -1.480807821 | 0.66475407  | -2.227602488 | 0.025907035 | 0.091537961 |
| ENSMUSG00000081437 | 14.16208301 | -1.480625333 | 0.644513384 | -2.297276317 | 0.021603012 | 0.079276544 |
| ENSMUSG00000111661 | 20.04256067 | -1.479009054 | 0.628160446 | -2.354508413 | 0.018547224 | 0.07020055  |
| ENSMUSG00000025427 | 18.25241849 | -1.477504605 | 0.696941032 | -2.119985103 | 0.034007302 | 0.112950807 |
| ENSMUSG00000092284 | 128.0772397 | -1.47650306  | 0.288442769 | -5.118877021 | 3.07E-07    | 5.19E-06    |
| ENSMUSG00000026963 | 34.21261987 | -1.476383811 | 0.444285678 | -3.323050654 | 0.000890387 | 0.006046447 |
| ENSMUSG00000028763 | 10776.87795 | -1.476313576 | 0.114640715 | -12.87774219 | 6.01E-38    | 1.63E-35    |
| ENSMUSG00000020437 | 449.982629  | -1.475629607 | 0.179081893 | -8.239971028 | 1.72E-16    | 9.80E-15    |
| ENSMUSG00000024033 | 24.10889446 | -1.475125177 | 0.520753259 | -2.832675842 | 0.004616017 | 0.023220315 |
| ENSMUSG00000044387 | 62.31539832 | -1.473249505 | 0.36466474  | -4.04001084  | 5.34E-05    | 0.000531413 |
| ENSMUSG00000081249 | 37.94657796 | -1.473050326 | 0.448585024 | -3.283770628 | 0.001024282 | 0.006776403 |
| ENSMUSG00000047730 | 68140.8179  | -1.470816938 | 0.173718265 | -8.466679878 | 2.52E-17    | 1.60E-15    |
| ENSMUSG00000030930 | 251.9590349 | -1.469939453 | 0.197448606 | -7.444668687 | 9.72E-14    | 4.21E-12    |
| ENSMUSG00000015468 | 350.9960034 | -1.46802358  | 0.18531654  | -7.92170834  | 2.34E-15    | 1.22E-13    |
| ENSMUSG00000013523 | 267.7876854 | -1.466949904 | 0.197798314 | -7.416392372 | 1.20E-13    | 5.11E-12    |

|                    |             |              |             |              |             |             |
|--------------------|-------------|--------------|-------------|--------------|-------------|-------------|
| ENSMUSG00000026564 | 20.41308323 | -1.466365713 | 0.550290806 | -2.664710546 | 0.007705461 | 0.035278073 |
| ENSMUSG00000102599 | 19.33180692 | -1.466136835 | 0.660544741 | -2.219587475 | 0.026446783 | 0.093070808 |
| ENSMUSG00000053263 | 45.14992714 | -1.463943502 | 0.44210791  | -3.311280956 | 0.000928699 | 0.006258966 |
| ENSMUSG00000094928 | 14.46679653 | -1.463892774 | 0.638543553 | -2.292549609 | 0.021873948 | 0.080014114 |
| ENSMUSG00000115389 | 15.42221946 | -1.462986075 | 0.701569678 | -2.085304029 | 0.037041712 | 0.12048764  |
| ENSMUSG00000053647 | 442.4594121 | -1.462617694 | 0.208713154 | -7.007788749 | 2.42E-12    | 8.98E-11    |
| ENSMUSG00000103409 | 27.55869637 | -1.461117857 | 0.572985602 | -2.550007979 | 0.010772045 | 0.045976533 |
| ENSMUSG00000050822 | 53.70022936 | -1.460551046 | 0.379389538 | -3.849739907 | 0.000118243 | 0.001057739 |
| ENSMUSG00000017211 | 82.18292847 | -1.459638188 | 0.469787256 | -3.107019549 | 0.001889839 | 0.011244744 |
| ENSMUSG00000024029 | 8237.450994 | -1.459189244 | 0.140000519 | -10.42274165 | 1.95E-25    | 2.41E-23    |
| ENSMUSG00000006575 | 132.9311943 | -1.458315025 | 0.311669728 | -4.67903968  | 2.88E-06    | 3.91E-05    |
| ENSMUSG00000029420 | 484.8400639 | -1.458044929 | 0.226767566 | -6.429689014 | 1.28E-10    | 3.82E-09    |
| ENSMUSG00000017466 | 62.05622914 | -1.457128785 | 0.359415701 | -4.054160071 | 5.03E-05    | 0.00050485  |
| ENSMUSG00000039543 | 16.25808492 | -1.454242144 | 0.628813244 | -2.312677348 | 0.020740385 | 0.076721862 |
| ENSMUSG00000027674 | 46.46781407 | -1.45389072  | 0.589676737 | -2.465572453 | 0.013679451 | 0.055436204 |
| ENSMUSG00000036211 | 35.90361872 | -1.453508859 | 0.434537799 | -3.344953793 | 0.000822963 | 0.005641836 |
| ENSMUSG00000068327 | 17.15973243 | -1.451039167 | 0.645320544 | -2.248555667 | 0.02454078  | 0.087691704 |
| ENSMUSG00000002808 | 75.61429681 | -1.450200939 | 0.287693102 | -5.040791486 | 4.64E-07    | 7.52E-06    |
| ENSMUSG00000086460 | 14.46265478 | -1.449332175 | 0.668130965 | -2.169233653 | 0.030064949 | 0.102472633 |
| ENSMUSG00000023966 | 38.30229772 | -1.449047743 | 0.405520173 | -3.57330619  | 0.000352502 | 0.002744815 |
| ENSMUSG00000055567 | 15.22264465 | -1.448261635 | 0.624366278 | -2.319570558 | 0.02036412  | 0.075501287 |
| ENSMUSG00000036915 | 20.65841116 | -1.447580852 | 0.532265279 | -2.719660493 | 0.006534897 | 0.030830283 |
| ENSMUSG00000017165 | 34.12199914 | -1.446668381 | 0.483462115 | -2.992309708 | 0.002768752 | 0.015409519 |
| ENSMUSG00000037263 | 24.00389942 | -1.445144145 | 0.5778476   | -2.500908795 | 0.012387508 | 0.051136198 |
| ENSMUSG00000085830 | 148.2299323 | -1.443814184 | 0.273452237 | -5.279950157 | 1.29E-07    | 2.37E-06    |
| ENSMUSG00000051054 | 64.09755909 | -1.442838241 | 0.335768403 | -4.297123335 | 1.73E-05    | 0.000195675 |
| ENSMUSG00000039145 | 5279.457098 | -1.44201201  | 0.129907396 | -11.10030728 | 1.25E-28    | 1.95E-26    |
| ENSMUSG00000037016 | 65.02151792 | -1.440446748 | 0.373371075 | -3.85794949  | 0.000114342 | 0.001028619 |
| ENSMUSG00000115338 | 253.0521936 | -1.438987827 | 0.262489435 | -5.482079026 | 4.20E-08    | 8.41E-07    |

|                     |             |              |             |              |             |             |
|---------------------|-------------|--------------|-------------|--------------|-------------|-------------|
| ENSMUSG00000092383  | 24.26625447 | -1.438815551 | 0.518343403 | -2.775796011 | 0.005506675 | 0.026842481 |
| ENSMUSG00000043286  | 290.4648476 | -1.437896674 | 0.213644613 | -6.730320288 | 1.69E-11    | 5.67E-10    |
| ENSMUSG00000034457  | 91.21586019 | -1.436141794 | 0.398692912 | -3.602125222 | 0.000315626 | 0.002494253 |
| ENSMUSG00000044083  | 63.40658751 | -1.436104806 | 0.329991762 | -4.351941384 | 1.35E-05    | 0.000156487 |
| ENSMUSG00000086001  | 12.46651536 | -1.43512401  | 0.68092981  | -2.107594629 | 0.035066069 | 0.115613305 |
| ENSMUSG00000032773  | 99.8922414  | -1.434469472 | 0.290167669 | -4.943588222 | 7.67E-07    | 1.19E-05    |
| ENSMUSG00000063646  | 3441.373264 | -1.434058733 | 0.109922495 | -13.04608972 | 6.69E-39    | 1.94E-36    |
| ENSMUSG00000023387  | 35.40480712 | -1.431686479 | 0.431965973 | -3.31435013  | 0.000918564 | 0.006209426 |
| ENSMUSG00000018830  | 17.31496784 | -1.429830355 | 0.598489248 | -2.389066067 | 0.016891265 | 0.06526197  |
| ENSMUSG00000004113  | 33.02426011 | -1.428717253 | 0.466038941 | -3.065660672 | 0.002171896 | 0.012600277 |
| ENSMUSG00000025355  | 15.0805673  | -1.428405524 | 0.638501465 | -2.237121764 | 0.025278383 | 0.089823648 |
| ENSMUSG00000056738  | 66.43860525 | -1.428286043 | 0.347310687 | -4.112416044 | 3.92E-05    | 0.000402013 |
| ENSMUSG00000030897  | 180.5137791 | -1.428245215 | 0.302395409 | -4.723104823 | 2.32E-06    | 3.23E-05    |
| ENSMUSG00000010080  | 1666.017345 | -1.428061922 | 0.13365966  | -10.68431511 | 1.21E-26    | 1.57E-24    |
| ENSMUSG00000030399  | 52.11938841 | -1.427706629 | 0.378024187 | -3.776760002 | 0.000158882 | 0.001366456 |
| ENSMUSG00000040605  | 158.6496728 | -1.426912293 | 0.267310188 | -5.338039308 | 9.40E-08    | 1.78E-06    |
| ENSMUSG00000015599  | 31.14324509 | -1.426900268 | 0.665323137 | -2.144672548 | 0.031979037 | 0.107761334 |
| ENSMUSG00000047507  | 377.1447518 | -1.426618825 | 0.198906258 | -7.172317437 | 7.37E-13    | 2.91E-11    |
| ENSMUSG000000109508 | 38.14841084 | -1.425246542 | 0.43267717  | -3.294018362 | 0.00098766  | 0.00658273  |
| ENSMUSG00000008129  | 35.90834227 | -1.423959318 | 0.472039103 | -3.016613051 | 0.002556159 | 0.014435274 |
| ENSMUSG00000025780  | 370.5586443 | -1.422083272 | 0.218039201 | -6.522144953 | 6.93E-11    | 2.13E-09    |
| ENSMUSG00000047228  | 35.2587045  | -1.419545577 | 0.411496926 | -3.449711256 | 0.000561186 | 0.004080541 |
| ENSMUSG000000110569 | 23.42970416 | -1.417639922 | 0.623702157 | -2.272943754 | 0.02302957  | 0.083387309 |
| ENSMUSG00000013076  | 535.6173331 | -1.41761041  | 0.254993704 | -5.559393774 | 2.71E-08    | 5.56E-07    |
| ENSMUSG00000066705  | 26.2118972  | -1.416703064 | 0.566954133 | -2.498796608 | 0.012461581 | 0.051368894 |
| ENSMUSG00000026463  | 40.74490185 | -1.41597026  | 0.43372786  | -3.264651386 | 0.001095989 | 0.007184493 |
| ENSMUSG00000036770  | 551.955486  | -1.414594077 | 0.168446986 | -8.397859258 | 4.55E-17    | 2.81E-15    |
| ENSMUSG00000079588  | 59.68411393 | -1.412248436 | 0.369905899 | -3.817858651 | 0.000134615 | 0.001184708 |
| ENSMUSG00000085663  | 11.80338994 | -1.411256614 | 0.701173531 | -2.012706628 | 0.044145502 | 0.13782568  |



|                    |             |              |             |              |             |             |
|--------------------|-------------|--------------|-------------|--------------|-------------|-------------|
| ENSMUSG00000047733 | 19.42932705 | -1.407954215 | 0.575671853 | -2.445758302 | 0.014454787 | 0.057925642 |
| ENSMUSG00000040231 | 99.60741212 | -1.407490015 | 0.321174321 | -4.382324242 | 1.17E-05    | 0.000137675 |
| ENSMUSG00000086287 | 36.89066474 | -1.406686337 | 0.395449144 | -3.557186448 | 0.000374848 | 0.002896565 |
| ENSMUSG00000079442 | 112.4648548 | -1.405434992 | 0.380223934 | -3.696334885 | 0.000218734 | 0.001814731 |
| ENSMUSG00000026686 | 62.07581582 | -1.403990656 | 0.385021015 | -3.646529934 | 0.000265806 | 0.002142295 |
| ENSMUSG00000108832 | 21.86595528 | -1.403238116 | 0.534913916 | -2.623297083 | 0.00870833  | 0.038887559 |
| ENSMUSG00000034796 | 26.26164255 | -1.403128704 | 0.488415158 | -2.872819734 | 0.004068262 | 0.020967485 |
| ENSMUSG00000049897 | 74.90683399 | -1.403095213 | 0.286093667 | -4.904321125 | 9.38E-07    | 1.42E-05    |
| ENSMUSG00000110631 | 9723.154479 | -1.403040962 | 0.416389567 | -3.369539183 | 0.00075294  | 0.005227316 |
| ENSMUSG00000115009 | 68.60679857 | -1.40085588  | 0.377046429 | -3.715340532 | 0.00020293  | 0.001698658 |
| ENSMUSG00000105839 | 56.19548617 | -1.40026465  | 0.463308386 | -3.02231665  | 0.00250848  | 0.014201983 |
| ENSMUSG00000063632 | 33.0270478  | -1.399716131 | 0.437263754 | -3.201079713 | 0.001369136 | 0.0086033   |
| ENSMUSG00000031809 | 13.50572026 | -1.397211738 | 0.660258129 | -2.11615984  | 0.034331216 | 0.113813057 |
| ENSMUSG00000031766 | 276.3323236 | -1.394825667 | 0.243542366 | -5.727240359 | 1.02E-08    | 2.27E-07    |
| ENSMUSG00000027314 | 1713.544696 | -1.393219378 | 0.178208246 | -7.817928785 | 5.37E-15    | 2.69E-13    |
| ENSMUSG00000110266 | 861.0201667 | -1.393166808 | 0.246018853 | -5.662845715 | 1.49E-08    | 3.22E-07    |
| ENSMUSG00000041798 | 49.1142854  | -1.39191814  | 0.367689203 | -3.785583388 | 0.000153348 | 0.001323973 |
| ENSMUSG00000100022 | 66.79746742 | -1.391789543 | 0.3388254   | -4.107689514 | 4.00E-05    | 0.000409761 |
| ENSMUSG00000063428 | 118.3496896 | -1.391024256 | 0.328236848 | -4.237867453 | 2.26E-05    | 0.000245358 |
| ENSMUSG00000030606 | 65.79248151 | -1.390995489 | 0.366779297 | -3.792459119 | 0.000149163 | 0.001294854 |
| ENSMUSG00000085042 | 1135.12717  | -1.388928261 | 0.188556509 | -7.36611145  | 1.76E-13    | 7.30E-12    |
| ENSMUSG00000109649 | 14.03562182 | -1.388794498 | 0.635901865 | -2.183976135 | 0.028964002 | 0.099633843 |
| ENSMUSG00000113167 | 38.95875534 | -1.387687021 | 0.436515026 | -3.179013181 | 0.001477774 | 0.009158675 |
| ENSMUSG00000016995 | 211.7896976 | -1.387500571 | 0.312257694 | -4.443447184 | 8.85E-06    | 0.000106603 |
| ENSMUSG00000019320 | 3918.525641 | -1.387474685 | 0.104145657 | -13.32244403 | 1.71E-40    | 5.24E-38    |
| ENSMUSG00000070025 | 17.02385451 | -1.387420508 | 0.632610474 | -2.193167146 | 0.028295339 | 0.097998812 |
| ENSMUSG00000034675 | 118.745615  | -1.387196762 | 0.333610378 | -4.158134314 | 3.21E-05    | 0.000336568 |
| ENSMUSG00000037736 | 889.0197069 | -1.380546061 | 0.168197331 | -8.207895153 | 2.25E-16    | 1.26E-14    |
| ENSMUSG00000038517 | 92.59020181 | -1.380053884 | 0.304670124 | -4.529665947 | 5.91E-06    | 7.47E-05    |

|                    |             |              |             |              |             |             |
|--------------------|-------------|--------------|-------------|--------------|-------------|-------------|
| ENSMUSG00000060621 | 25.40396253 | -1.378420346 | 0.52052869  | -2.648115988 | 0.008094175 | 0.036688657 |
| ENSMUSG00000052727 | 224.6077446 | -1.377092458 | 0.212113718 | -6.492236675 | 8.46E-11    | 2.59E-09    |
| ENSMUSG00000089935 | 24.40173093 | -1.37665824  | 0.514255203 | -2.676994286 | 0.00742859  | 0.0342637   |
| ENSMUSG00000031538 | 293.7284663 | -1.375929817 | 0.210841296 | -6.525902854 | 6.76E-11    | 2.09E-09    |
| ENSMUSG00000038132 | 79.04779559 | -1.375779192 | 0.370698845 | -3.711312324 | 0.000206188 | 0.001722813 |
| ENSMUSG00000055976 | 1153.648051 | -1.371640555 | 0.163652931 | -8.38139924  | 5.23E-17    | 3.20E-15    |
| ENSMUSG00000110626 | 27.14893414 | -1.370031503 | 0.458605995 | -2.987382457 | 0.002813775 | 0.015613334 |
| ENSMUSG00000025357 | 1897.948674 | -1.369501371 | 0.133591707 | -10.25139508 | 1.17E-24    | 1.35E-22    |
| ENSMUSG00000030787 | 115.3744837 | -1.368557479 | 0.256642912 | -5.332535653 | 9.69E-08    | 1.82E-06    |
| ENSMUSG00000002500 | 155.3227015 | -1.366452074 | 0.217945829 | -6.269686745 | 3.62E-10    | 1.01E-08    |
| ENSMUSG00000074912 | 141.9655682 | -1.365286214 | 0.220403484 | -6.194485624 | 5.85E-10    | 1.57E-08    |
| ENSMUSG00000037860 | 61.56459653 | -1.36309553  | 0.363877838 | -3.746025144 | 0.000179659 | 0.001523989 |
| ENSMUSG00000103115 | 16.17221884 | -1.361336739 | 0.660332463 | -2.061592934 | 0.039246507 | 0.126260294 |
| ENSMUSG00000034730 | 27.4314169  | -1.361314764 | 0.466047841 | -2.92097644  | 0.003489362 | 0.018518864 |
| ENSMUSG00000037813 | 77.03421892 | -1.361073613 | 0.314241787 | -4.331294153 | 1.48E-05    | 0.000170666 |
| ENSMUSG00000028865 | 41.7600514  | -1.360094283 | 0.439033766 | -3.097926373 | 0.001948798 | 0.011537073 |
| ENSMUSG00000105105 | 47.33136861 | -1.360063795 | 0.351131429 | -3.873375273 | 0.000107338 | 0.000976245 |
| ENSMUSG00000085083 | 17.41190278 | -1.359724306 | 0.585748591 | -2.32134456  | 0.020268255 | 0.075233415 |
| ENSMUSG00000105387 | 15.10028803 | -1.359177206 | 0.638698827 | -2.128040867 | 0.033333695 | 0.111250335 |
| ENSMUSG00000097636 | 26.6757995  | -1.356807115 | 0.49055625  | -2.765854304 | 0.005677389 | 0.027500317 |
| ENSMUSG00000080888 | 26.81469017 | -1.356803768 | 0.48635462  | -2.789741705 | 0.005275011 | 0.02592859  |
| ENSMUSG00000046160 | 124.0868456 | -1.354365795 | 0.317117148 | -4.270868991 | 1.95E-05    | 0.000216249 |
| ENSMUSG00000000142 | 29949.69167 | -1.350994275 | 0.129010593 | -10.47196395 | 1.16E-25    | 1.44E-23    |
| ENSMUSG00000057182 | 188.1314201 | -1.35071308  | 0.213374985 | -6.330231636 | 2.45E-10    | 6.97E-09    |
| ENSMUSG00000092083 | 85.11215182 | -1.34984538  | 0.358274654 | -3.76762734  | 0.000164806 | 0.001411424 |
| ENSMUSG00000020732 | 16.84921191 | -1.348877611 | 0.584247759 | -2.308742465 | 0.020957876 | 0.07734502  |
| ENSMUSG00000076436 | 19.34230407 | -1.347970675 | 0.632244653 | -2.132039661 | 0.033003586 | 0.110446125 |
| ENSMUSG00000072572 | 60.29599551 | -1.347908406 | 0.422243459 | -3.192254085 | 0.001411671 | 0.008825813 |
| ENSMUSG00000066170 | 238.8050959 | -1.34739476  | 0.597451882 | -2.255235609 | 0.024118544 | 0.086557394 |

|                    |             |              |             |              |             |             |
|--------------------|-------------|--------------|-------------|--------------|-------------|-------------|
| ENSMUSG00000109489 | 70.23179288 | -1.346517789 | 0.303826983 | -4.431857154 | 9.34E-06    | 0.000111954 |
| ENSMUSG00000030592 | 19.03831321 | -1.34637632  | 0.560043447 | -2.404056914 | 0.016214249 | 0.063204678 |
| ENSMUSG00000002257 | 71.11978831 | -1.345516532 | 0.356591647 | -3.773269909 | 0.000161122 | 0.001384121 |
| ENSMUSG00000080746 | 36.67646447 | -1.343593329 | 0.487700413 | -2.754956309 | 0.005869997 | 0.028251975 |
| ENSMUSG00000044770 | 4745.042082 | -1.340710083 | 0.107586144 | -12.46173568 | 1.21E-35    | 2.89E-33    |
| ENSMUSG00000032769 | 102.2442043 | -1.340364527 | 0.370830264 | -3.614496054 | 0.000300932 | 0.002396819 |
| ENSMUSG00000094286 | 26.43690307 | -1.339232164 | 0.486180429 | -2.754599081 | 0.005876409 | 0.028261765 |
| ENSMUSG00000004864 | 15270.80131 | -1.338750631 | 0.109473349 | -12.22900951 | 2.18E-34    | 5.00E-32    |
| ENSMUSG00000034041 | 53.05255169 | -1.338414871 | 0.39895293  | -3.354819002 | 0.000794169 | 0.00546123  |
| ENSMUSG00000037579 | 83.30274548 | -1.338413898 | 0.336176111 | -3.98128795  | 6.85E-05    | 0.000662581 |
| ENSMUSG00000040592 | 44.49399903 | -1.336523177 | 0.362731609 | -3.684606311 | 0.000229056 | 0.001886332 |
| ENSMUSG00000037428 | 145.2241647 | -1.333160273 | 0.386681839 | -3.447693006 | 0.000565396 | 0.004105797 |
| ENSMUSG00000026879 | 368.2361706 | -1.332302235 | 0.226045128 | -5.89396571  | 3.77E-09    | 9.10E-08    |
| ENSMUSG00000041801 | 135.9697623 | -1.331537376 | 0.249247582 | -5.342227856 | 9.18E-08    | 1.74E-06    |
| ENSMUSG00000023000 | 55.23115688 | -1.330241793 | 0.395328172 | -3.364905126 | 0.0007657   | 0.005294844 |
| ENSMUSG00000031284 | 56.39746605 | -1.32867009  | 0.387130163 | -3.432101695 | 0.000598923 | 0.004321119 |
| ENSMUSG00000029449 | 238.2854123 | -1.328289684 | 0.241754224 | -5.494380456 | 3.92E-08    | 7.88E-07    |
| ENSMUSG00000002664 | 90.01030186 | -1.326399516 | 0.314096687 | -4.222901968 | 2.41E-05    | 0.000260585 |
| ENSMUSG00000064177 | 339.294368  | -1.326245593 | 0.217751133 | -6.090648421 | 1.12E-09    | 2.92E-08    |
| ENSMUSG00000061718 | 22513.36992 | -1.322644908 | 0.118322659 | -11.17828929 | 5.21E-29    | 8.30E-27    |
| ENSMUSG00000036964 | 130.9980973 | -1.31994529  | 0.327115079 | -4.035109889 | 5.46E-05    | 0.0005401   |
| ENSMUSG00000034271 | 70.40064229 | -1.31967576  | 0.342817316 | -3.849501469 | 0.000118358 | 0.001057921 |
| ENSMUSG00000022415 | 450.4626476 | -1.319431342 | 0.189487189 | -6.963169123 | 3.33E-12    | 1.22E-10    |
| ENSMUSG00000027350 | 6471.383626 | -1.316762455 | 0.360052291 | -3.657142274 | 0.000255043 | 0.002063007 |
| ENSMUSG00000055254 | 26.3609875  | -1.316117953 | 0.491896621 | -2.675598686 | 0.007459591 | 0.03437267  |
| ENSMUSG00000039133 | 19.52592119 | -1.314784201 | 0.566369544 | -2.321424618 | 0.020263938 | 0.075229913 |
| ENSMUSG00000112657 | 259.5741234 | -1.314229074 | 0.185405927 | -7.088387605 | 1.36E-12    | 5.18E-11    |
| ENSMUSG00000061462 | 145.1674143 | -1.31374835  | 0.325492652 | -4.036184352 | 5.43E-05    | 0.00053847  |
| ENSMUSG00000086929 | 25.78646731 | -1.31231989  | 0.488869191 | -2.684398842 | 0.007266037 | 0.033639171 |

|                    |             |              |             |              |             |             |
|--------------------|-------------|--------------|-------------|--------------|-------------|-------------|
| ENSMUSG00000041062 | 18.39916629 | -1.312254523 | 0.637481647 | -2.058497728 | 0.039542379 | 0.12699231  |
| ENSMUSG00000026121 | 838.2881543 | -1.31210944  | 0.122046205 | -10.75092374 | 5.87E-27    | 7.83E-25    |
| ENSMUSG00000022843 | 4301.2039   | -1.307352196 | 0.1300381   | -10.05360888 | 8.86E-24    | 9.59E-22    |
| ENSMUSG00000023987 | 449.6419811 | -1.303784735 | 0.20583708  | -6.334061556 | 2.39E-10    | 6.84E-09    |
| ENSMUSG00000100014 | 17.57902667 | -1.303188603 | 0.585142856 | -2.227128966 | 0.025938656 | 0.091586125 |
| ENSMUSG00000095026 | 544.1902625 | -1.302895199 | 0.206192054 | -6.318842916 | 2.64E-10    | 7.46E-09    |
| ENSMUSG00000035930 | 250.2280475 | -1.302706533 | 0.191252256 | -6.811457066 | 9.66E-12    | 3.34E-10    |
| ENSMUSG00000042258 | 79.01139508 | -1.301596745 | 0.291579117 | -4.463957355 | 8.05E-06    | 9.79E-05    |
| ENSMUSG00000025867 | 652.7968617 | -1.301567133 | 0.192490369 | -6.761725999 | 1.36E-11    | 4.61E-10    |
| ENSMUSG00000007021 | 34.11722206 | -1.300410885 | 0.451462664 | -2.88043949  | 0.003971212 | 0.020529007 |
| ENSMUSG00000098098 | 28.41936774 | -1.300387092 | 0.537967876 | -2.417220709 | 0.015639531 | 0.061494531 |
| ENSMUSG00000075511 | 1144.744573 | -1.300158551 | 0.144627754 | -8.989689156 | 2.48E-19    | 1.89E-17    |
| ENSMUSG00000025473 | 279.6260803 | -1.297322789 | 0.194345754 | -6.675333828 | 2.47E-11    | 8.10E-10    |
| ENSMUSG00000086395 | 87.78696454 | -1.297269693 | 0.292282562 | -4.43840948  | 9.06E-06    | 0.00010888  |
| ENSMUSG00000056162 | 101.6853694 | -1.296525655 | 0.269662068 | -4.807964514 | 1.52E-06    | 2.21E-05    |
| ENSMUSG00000018570 | 877.1139304 | -1.29580649  | 0.155393455 | -8.338874297 | 7.50E-17    | 4.50E-15    |
| ENSMUSG00000034701 | 228.6734422 | -1.295360228 | 0.221134086 | -5.857804419 | 4.69E-09    | 1.11E-07    |
| ENSMUSG00000026163 | 21.79991903 | -1.294254957 | 0.550865481 | -2.349493665 | 0.018798964 | 0.070996731 |
| ENSMUSG00000103217 | 73.4778497  | -1.293553605 | 0.331969307 | -3.896606038 | 9.76E-05    | 0.000897279 |
| ENSMUSG00000038068 | 149.4202246 | -1.291526587 | 0.247363837 | -5.221161684 | 1.78E-07    | 3.17E-06    |
| ENSMUSG00000029832 | 58.73953236 | -1.290841576 | 0.334509776 | -3.858905387 | 0.000113896 | 0.001025846 |
| ENSMUSG00000035713 | 205.8828513 | -1.290372061 | 0.231603096 | -5.571480185 | 2.53E-08    | 5.23E-07    |
| ENSMUSG00000112481 | 225.2951495 | -1.289325862 | 0.206645364 | -6.239316652 | 4.39E-10    | 1.21E-08    |
| ENSMUSG00000082532 | 22.49861354 | -1.286923776 | 0.524571954 | -2.45328361  | 0.014155868 | 0.056973473 |
| ENSMUSG00000009114 | 33.68771095 | -1.286763104 | 0.506370445 | -2.5411497   | 0.01104886  | 0.046915581 |
| ENSMUSG00000023192 | 17.39050857 | -1.286622688 | 0.603341899 | -2.132493518 | 0.032966297 | 0.110371023 |
| ENSMUSG00000027434 | 386.9499661 | -1.286334304 | 0.27503899  | -4.676916183 | 2.91E-06    | 3.95E-05    |
| ENSMUSG00000021998 | 2067.121363 | -1.285206856 | 0.157390018 | -8.165745661 | 3.19E-16    | 1.76E-14    |
| ENSMUSG00000037106 | 473.2011937 | -1.28466914  | 0.243279677 | -5.280626627 | 1.29E-07    | 2.36E-06    |

|                    |             |              |             |              |             |             |
|--------------------|-------------|--------------|-------------|--------------|-------------|-------------|
| ENSMUSG00000085886 | 139.9616728 | -1.281925237 | 0.22901124  | -5.597652041 | 2.17E-08    | 4.57E-07    |
| ENSMUSG00000070330 | 23.69012227 | -1.27999534  | 0.5099423   | -2.510078768 | 0.012070423 | 0.050173814 |
| ENSMUSG00000034687 | 2522.550998 | -1.279723259 | 0.383712041 | -3.335113635 | 0.000852645 | 0.005827413 |
| ENSMUSG00000047182 | 17.85965193 | -1.27949651  | 0.570430591 | -2.243036278 | 0.024894475 | 0.088742278 |
| ENSMUSG00000112592 | 49.45061192 | -1.278131248 | 0.387558927 | -3.297901707 | 0.000974102 | 0.006500136 |
| ENSMUSG00000033854 | 320.0068979 | -1.277627085 | 0.579229565 | -2.205735277 | 0.02740254  | 0.095510101 |
| ENSMUSG00000018486 | 159.1462406 | -1.277207427 | 0.21858316  | -5.843119061 | 5.12E-09    | 1.20E-07    |
| ENSMUSG00000031831 | 82.45169376 | -1.275561293 | 0.314001174 | -4.062281916 | 4.86E-05    | 0.00048993  |
| ENSMUSG00000020325 | 175.4718444 | -1.275432641 | 0.262835285 | -4.852592912 | 1.22E-06    | 1.80E-05    |
| ENSMUSG00000028041 | 1107.348351 | -1.274773037 | 0.119787236 | -10.64197721 | 1.90E-26    | 2.42E-24    |
| ENSMUSG00000105532 | 25.80436599 | -1.270983969 | 0.472616582 | -2.68924963  | 0.007161284 | 0.033222257 |
| ENSMUSG00000104943 | 35.76844639 | -1.270391985 | 0.434233461 | -2.925596711 | 0.003437963 | 0.018315488 |
| ENSMUSG00000024112 | 257.3717974 | -1.269709462 | 0.266212035 | -4.769541924 | 1.85E-06    | 2.63E-05    |
| ENSMUSG00000054932 | 89.95268895 | -1.269332697 | 0.443627847 | -2.86125568  | 0.004219666 | 0.021602745 |
| ENSMUSG00000108714 | 18.2588007  | -1.269324909 | 0.580956975 | -2.184886255 | 0.028897188 | 0.099480732 |
| ENSMUSG00000078586 | 390.1796176 | -1.268564726 | 0.623458573 | -2.03472176  | 0.041878877 | 0.13254233  |
| ENSMUSG00000026413 | 4515.213049 | -1.267489402 | 0.109135543 | -11.61390113 | 3.50E-31    | 6.63E-29    |
| ENSMUSG00000049100 | 43.63506402 | -1.266786125 | 0.460764019 | -2.749316511 | 0.005971969 | 0.028620389 |
| ENSMUSG00000099767 | 71.33765586 | -1.264999845 | 0.346782749 | -3.647816532 | 0.000264478 | 0.002133912 |
| ENSMUSG00000035314 | 1189.075421 | -1.264304805 | 0.150095154 | -8.423355246 | 3.66E-17    | 2.29E-15    |
| ENSMUSG00000000037 | 215.274743  | -1.263887405 | 0.223632352 | -5.651630434 | 1.59E-08    | 3.42E-07    |
| ENSMUSG00000042428 | 2104.755499 | -1.263563512 | 0.165778216 | -7.622011758 | 2.50E-14    | 1.15E-12    |
| ENSMUSG00000073400 | 37.7005605  | -1.26217438  | 0.417013396 | -3.026699847 | 0.002472393 | 0.014026162 |
| ENSMUSG00000002324 | 1828.854833 | -1.259685807 | 0.452869463 | -2.781564909 | 0.005409751 | 0.026468377 |
| ENSMUSG00000009545 | 20476.96526 | -1.2596822   | 0.114742311 | -10.97835829 | 4.86E-28    | 7.03E-26    |
| ENSMUSG00000113396 | 33.19988251 | -1.259208586 | 0.484332652 | -2.599883738 | 0.009325535 | 0.041051866 |
| ENSMUSG00000028545 | 44.03307351 | -1.25918651  | 0.368198645 | -3.41985645  | 0.000626542 | 0.004480535 |
| ENSMUSG00000056220 | 2467.012565 | -1.258243568 | 0.12345259  | -10.19211967 | 2.15E-24    | 2.45E-22    |
| ENSMUSG00000064263 | 23.73537834 | -1.256095486 | 0.541164418 | -2.3210977   | 0.020281572 | 0.075270316 |

|                    |             |              |             |              |             |             |
|--------------------|-------------|--------------|-------------|--------------|-------------|-------------|
| ENSMUSG00000011263 | 38.15666853 | -1.254836611 | 0.464303258 | -2.702622886 | 0.006879475 | 0.032163348 |
| ENSMUSG00000044006 | 78.95355581 | -1.254591746 | 0.400609177 | -3.131709948 | 0.001737915 | 0.010474929 |
| ENSMUSG00000027533 | 722.6856196 | -1.254458383 | 0.152114384 | -8.246809737 | 1.63E-16    | 9.30E-15    |
| ENSMUSG00000024430 | 174.8751992 | -1.253931772 | 0.246443117 | -5.088118464 | 3.62E-07    | 6.01E-06    |
| ENSMUSG00000034579 | 70.70579517 | -1.253069546 | 0.360740405 | -3.47360464  | 0.000513517 | 0.003794548 |
| ENSMUSG00000075592 | 67.91152027 | -1.252787179 | 0.352789947 | -3.551085258 | 0.000383646 | 0.002952076 |
| ENSMUSG00000031972 | 344.9479373 | -1.252160498 | 0.208235027 | -6.013207841 | 1.82E-09    | 4.58E-08    |
| ENSMUSG00000017943 | 21.44732355 | -1.251395569 | 0.616639251 | -2.029380333 | 0.042419567 | 0.133691175 |
| ENSMUSG00000053617 | 669.0745583 | -1.251257087 | 0.168744135 | -7.415114534 | 1.22E-13    | 5.14E-12    |
| ENSMUSG00000025092 | 19.10186545 | -1.250445462 | 0.619312637 | -2.01908598  | 0.043478284 | 0.136219332 |
| ENSMUSG00000030745 | 33.88273525 | -1.25020525  | 0.510540217 | -2.448788966 | 0.01433374  | 0.057537886 |
| ENSMUSG00000091680 | 69.50783435 | -1.248024034 | 0.371432682 | -3.360027522 | 0.000779347 | 0.005370896 |
| ENSMUSG00000107481 | 34.32428044 | -1.247599761 | 0.506701096 | -2.462200638 | 0.01380874  | 0.055889056 |
| ENSMUSG00000089984 | 136.5688801 | -1.243079267 | 0.302303178 | -4.112028449 | 3.92E-05    | 0.000402504 |
| ENSMUSG00000040340 | 15.21992123 | -1.240962962 | 0.606037414 | -2.047667247 | 0.040592615 | 0.129470239 |
| ENSMUSG00000016028 | 2888.76421  | -1.239926834 | 0.150956432 | -8.213805898 | 2.14E-16    | 1.20E-14    |
| ENSMUSG00000081049 | 2153.628687 | -1.239744017 | 0.138258339 | -8.96686612  | 3.05E-19    | 2.28E-17    |
| ENSMUSG00000095930 | 46.37539318 | -1.238780912 | 0.40795752  | -3.036543884 | 0.002393073 | 0.013642105 |
| ENSMUSG00000028926 | 63.12864072 | -1.238659747 | 0.325734491 | -3.802666835 | 0.000143147 | 0.001249928 |
| ENSMUSG00000023942 | 1571.985717 | -1.238105352 | 0.148281425 | -8.349699603 | 6.84E-17    | 4.14E-15    |
| ENSMUSG00000031493 | 74.44285613 | -1.237264066 | 0.392645144 | -3.151099876 | 0.001626569 | 0.009934449 |
| ENSMUSG00000097702 | 18.03927858 | -1.237042124 | 0.562173165 | -2.200464556 | 0.027773952 | 0.096522815 |
| ENSMUSG00000111933 | 15.2816695  | -1.236643202 | 0.609943837 | -2.027470608 | 0.042614307 | 0.134172196 |
| ENSMUSG00000020451 | 14004.71871 | -1.236458741 | 0.098827512 | -12.51128072 | 6.48E-36    | 1.57E-33    |
| ENSMUSG00000020826 | 2438.689436 | -1.235468757 | 0.200769058 | -6.153681083 | 7.57E-10    | 2.01E-08    |
| ENSMUSG00000113389 | 19.86282949 | -1.235321692 | 0.585624876 | -2.109407819 | 0.034909395 | 0.115250099 |
| ENSMUSG00000056032 | 240.0150964 | -1.235100241 | 0.348254346 | -3.546546528 | 0.000390316 | 0.002995331 |
| ENSMUSG00000083894 | 76.81012066 | -1.234822847 | 0.303925038 | -4.062919121 | 4.85E-05    | 0.000488815 |
| ENSMUSG00000100277 | 22.7222169  | -1.233203129 | 0.543311552 | -2.269790004 | 0.023220327 | 0.083887335 |

|                    |             |              |             |              |             |             |
|--------------------|-------------|--------------|-------------|--------------|-------------|-------------|
| ENSMUSG00000060467 | 29.84586556 | -1.233098599 | 0.450554808 | -2.736844832 | 0.006203154 | 0.029521244 |
| ENSMUSG00000032313 | 227.6460379 | -1.232574633 | 0.235035111 | -5.244214913 | 1.57E-07    | 2.82E-06    |
| ENSMUSG00000098859 | 71.16279747 | -1.232417779 | 0.293923835 | -4.192983496 | 2.75E-05    | 0.000293063 |
| ENSMUSG00000032589 | 697.672012  | -1.231607667 | 0.154558633 | -7.96854659  | 1.61E-15    | 8.52E-14    |
| ENSMUSG00000021749 | 1728.499536 | -1.229672424 | 0.159381671 | -7.715268753 | 1.21E-14    | 5.85E-13    |
| ENSMUSG00000032009 | 3479.395321 | -1.228859749 | 0.178868327 | -6.870192018 | 6.41E-12    | 2.27E-10    |
| ENSMUSG00000024030 | 31.63685115 | -1.228258218 | 0.448577541 | -2.738117949 | 0.006179191 | 0.029431623 |
| ENSMUSG00000050711 | 42.9506678  | -1.227994904 | 0.417437107 | -2.941748311 | 0.003263651 | 0.017576111 |
| ENSMUSG00000097915 | 22.24995012 | -1.22472725  | 0.539221766 | -2.271286748 | 0.023129625 | 0.083681662 |
| ENSMUSG00000017300 | 62.65181224 | -1.224258122 | 0.369473577 | -3.313520097 | 0.000921295 | 0.006222228 |
| ENSMUSG00000027220 | 132.2182077 | -1.224203915 | 0.276787709 | -4.422898397 | 9.74E-06    | 0.000116325 |
| ENSMUSG00000006546 | 70.0926131  | -1.221896579 | 0.36131357  | -3.381817568 | 0.000720079 | 0.005032433 |
| ENSMUSG00000113093 | 203.5820982 | -1.22163413  | 0.260870496 | -4.682914119 | 2.83E-06    | 3.85E-05    |
| ENSMUSG00000103711 | 429.8001405 | -1.220678263 | 0.188743519 | -6.467391676 | 9.97E-11    | 3.02E-09    |
| ENSMUSG00000046598 | 9772.326596 | -1.220295444 | 0.11121975  | -10.97193123 | 5.21E-28    | 7.50E-26    |
| ENSMUSG00000098057 | 91.24290442 | -1.219348606 | 0.300081022 | -4.063397941 | 4.84E-05    | 0.000488033 |
| ENSMUSG00000031932 | 23.33490949 | -1.218459538 | 0.547678981 | -2.224769584 | 0.02609671  | 0.092056744 |
| ENSMUSG00000040345 | 160.8832272 | -1.216792857 | 0.264684189 | -4.597149764 | 4.28E-06    | 5.62E-05    |
| ENSMUSG00000073787 | 368.9015638 | -1.216259089 | 0.278316731 | -4.370053796 | 1.24E-05    | 0.000144958 |
| ENSMUSG00000039953 | 7852.352394 | -1.215910705 | 0.120384403 | -10.10023457 | 5.51E-24    | 6.11E-22    |
| ENSMUSG00000111151 | 31.30075536 | -1.215698818 | 0.441369609 | -2.754378175 | 0.005880378 | 0.028268658 |
| ENSMUSG00000071176 | 265.0320996 | -1.215599817 | 0.184771547 | -6.578934008 | 4.74E-11    | 1.49E-09    |
| ENSMUSG00000103532 | 21.41002301 | -1.21538237  | 0.564692629 | -2.152290128 | 0.031374511 | 0.106012571 |
| ENSMUSG00000030866 | 1262.116482 | -1.214366225 | 0.19058033  | -6.37193895  | 1.87E-10    | 5.43E-09    |
| ENSMUSG00000078234 | 122.4143153 | -1.213132242 | 0.237623292 | -5.105274959 | 3.30E-07    | 5.54E-06    |
| ENSMUSG00000029510 | 39.3058582  | -1.212663336 | 0.42481225  | -2.854586551 | 0.004309289 | 0.021956009 |
| ENSMUSG00000087669 | 71.05764467 | -1.212572496 | 0.389781862 | -3.110900264 | 0.001865179 | 0.011118782 |
| ENSMUSG00000035699 | 216.7752865 | -1.211487846 | 0.266267478 | -4.549890409 | 5.37E-06    | 6.86E-05    |
| ENSMUSG00000026271 | 1138.778968 | -1.210001213 | 0.168846722 | -7.16627007  | 7.71E-13    | 3.04E-11    |

|                    |             |              |             |              |             |             |
|--------------------|-------------|--------------|-------------|--------------|-------------|-------------|
| ENSMUSG00000039347 | 179.7019609 | -1.209811245 | 0.229956434 | -5.26104542  | 1.43E-07    | 2.61E-06    |
| ENSMUSG00000033268 | 29.21565174 | -1.209093706 | 0.462755647 | -2.612812426 | 0.008980057 | 0.03984262  |
| ENSMUSG00000104351 | 117.0843896 | -1.207541475 | 0.287989714 | -4.193002094 | 2.75E-05    | 0.000293063 |
| ENSMUSG00000073599 | 121.3959818 | -1.20745156  | 0.269142371 | -4.486293091 | 7.25E-06    | 8.94E-05    |
| ENSMUSG00000081516 | 23.58654897 | -1.205371652 | 0.517896683 | -2.327436519 | 0.019942044 | 0.074289585 |
| ENSMUSG00000045019 | 253.9659887 | -1.204575476 | 0.229498745 | -5.24872358  | 1.53E-07    | 2.76E-06    |
| ENSMUSG00000113724 | 57.17982388 | -1.203927901 | 0.351129    | -3.428733884 | 0.000606404 | 0.004362391 |
| ENSMUSG00000028776 | 606.6442447 | -1.202211781 | 0.170632101 | -7.045636625 | 1.85E-12    | 6.94E-11    |
| ENSMUSG00000026235 | 1014.847489 | -1.201320439 | 0.155994623 | -7.701037504 | 1.35E-14    | 6.50E-13    |
| ENSMUSG00000097889 | 48.63562042 | -1.201289321 | 0.383218135 | -3.134740275 | 0.001720063 | 0.010404832 |
| ENSMUSG00000040488 | 75.69825768 | -1.201227166 | 0.331788081 | -3.620465092 | 0.000294074 | 0.002348905 |
| ENSMUSG00000023909 | 1363.447655 | -1.200266267 | 0.119647038 | -10.03172572 | 1.11E-23    | 1.17E-21    |
| ENSMUSG00000085779 | 210.2485774 | -1.200226332 | 0.277446011 | -4.325981571 | 1.52E-05    | 0.000174382 |
| ENSMUSG00000080966 | 29.1182307  | -1.200215827 | 0.477978205 | -2.511026267 | 0.012038074 | 0.050058386 |
| ENSMUSG00000059991 | 376.4751547 | -1.20020764  | 0.208760705 | -5.749202848 | 8.97E-09    | 2.03E-07    |
| ENSMUSG00000102737 | 154.4500854 | -1.200001359 | 0.244273536 | -4.912531176 | 8.99E-07    | 1.37E-05    |
| ENSMUSG00000103761 | 106.8290282 | -1.198752875 | 0.283095448 | -4.234447716 | 2.29E-05    | 0.000248878 |
| ENSMUSG00000038745 | 21519.61939 | -1.197869171 | 0.140463835 | -8.527954327 | 1.49E-17    | 9.71E-16    |
| ENSMUSG00000115764 | 36.27730502 | -1.197422236 | 0.481377664 | -2.487490231 | 0.012864799 | 0.052690152 |
| ENSMUSG00000058741 | 29.00297319 | -1.196506151 | 0.475716411 | -2.515166857 | 0.011897606 | 0.049628019 |
| ENSMUSG00000081052 | 23.23094209 | -1.195436985 | 0.511714707 | -2.33613959  | 0.019483968 | 0.072880235 |
| ENSMUSG00000097726 | 26.40863739 | -1.193649544 | 0.485619043 | -2.457995753 | 0.013971483 | 0.056404423 |
| ENSMUSG00000078202 | 4773.105619 | -1.190402507 | 0.119706849 | -9.944314116 | 2.67E-23    | 2.74E-21    |
| ENSMUSG00000074355 | 85.46373229 | -1.189456776 | 0.314177478 | -3.785939027 | 0.000153129 | 0.001322593 |
| ENSMUSG00000034573 | 283.2126062 | -1.188978376 | 0.202243198 | -5.878953581 | 4.13E-09    | 9.85E-08    |
| ENSMUSG00000068699 | 48.5552983  | -1.187514495 | 0.471640296 | -2.517839349 | 0.011807716 | 0.049342458 |
| ENSMUSG00000049555 | 130.8940162 | -1.186343987 | 0.279794371 | -4.240056667 | 2.23E-05    | 0.000243702 |
| ENSMUSG00000102414 | 56.93289029 | -1.186029726 | 0.345100313 | -3.436768039 | 0.0005887   | 0.004257    |
| ENSMUSG00000008153 | 61.20692027 | -1.185789623 | 0.359270696 | -3.300546452 | 0.000964967 | 0.006446896 |



|                    |             |              |             |              |             |             |
|--------------------|-------------|--------------|-------------|--------------|-------------|-------------|
| ENSMUSG00000028186 | 35.71559048 | -1.185529668 | 0.425151493 | -2.788487604 | 0.005295477 | 0.026021652 |
| ENSMUSG00000105590 | 49.71042185 | -1.185254998 | 0.415397775 | -2.853301269 | 0.004326758 | 0.022024888 |
| ENSMUSG00000039208 | 740.0961229 | -1.185210352 | 0.129791634 | -9.131639041 | 6.75E-20    | 5.41E-18    |
| ENSMUSG00000037025 | 987.3323268 | -1.184485928 | 0.144124844 | -8.218471544 | 2.06E-16    | 1.16E-14    |
| ENSMUSG00000062874 | 20.33608237 | -1.18255742  | 0.540582253 | -2.187562417 | 0.028701492 | 0.098929207 |
| ENSMUSG00000092512 | 27.54436663 | -1.182331247 | 0.46144768  | -2.562221671 | 0.010400491 | 0.044724519 |
| ENSMUSG00000039110 | 476.4704288 | -1.181399043 | 0.161748275 | -7.303935982 | 2.79E-13    | 1.14E-11    |
| ENSMUSG00000031981 | 176.8787629 | -1.181111091 | 0.286139184 | -4.12775026  | 3.66E-05    | 0.000379096 |
| ENSMUSG00000035561 | 41212.99554 | -1.180929759 | 0.139318046 | -8.476502484 | 2.32E-17    | 1.47E-15    |
| ENSMUSG00000042156 | 91.18118641 | -1.180723016 | 0.270937886 | -4.357910347 | 1.31E-05    | 0.000152677 |
| ENSMUSG00000059406 | 35.06245949 | -1.180595386 | 0.424119533 | -2.783638324 | 0.005375294 | 0.026328668 |
| ENSMUSG00000060402 | 131.4743769 | -1.177737971 | 0.321209237 | -3.666575659 | 0.00024582  | 0.002001474 |
| ENSMUSG00000026728 | 291.6215237 | -1.177269283 | 0.229478291 | -5.130198935 | 2.89E-07    | 4.92E-06    |
| ENSMUSG00000057132 | 136.9287341 | -1.177117829 | 0.273180669 | -4.308935311 | 1.64E-05    | 0.000186579 |
| ENSMUSG00000035891 | 3188.890185 | -1.176970218 | 0.136724725 | -8.608320223 | 7.41E-18    | 5.00E-16    |
| ENSMUSG00000062661 | 72.56687625 | -1.176740274 | 0.354750404 | -3.317093543 | 0.000909592 | 0.006158106 |
| ENSMUSG00000081670 | 51.83770428 | -1.175763734 | 0.369825826 | -3.179236415 | 0.001476636 | 0.009158675 |
| ENSMUSG00000096918 | 69.76112592 | -1.175734833 | 0.297208868 | -3.955921104 | 7.62E-05    | 0.000725356 |
| ENSMUSG00000098994 | 37.94220573 | -1.174693283 | 0.420056251 | -2.796514233 | 0.005165714 | 0.025517713 |
| ENSMUSG00000063765 | 145.5028538 | -1.174674789 | 0.250040659 | -4.697935105 | 2.63E-06    | 3.61E-05    |
| ENSMUSG00000053414 | 3744.952069 | -1.173302403 | 0.117193075 | -10.01170419 | 1.35E-23    | 1.42E-21    |
| ENSMUSG00000030543 | 41.45486675 | -1.172558718 | 0.410203606 | -2.858479787 | 0.004256762 | 0.021738048 |
| ENSMUSG00000043629 | 273.6701024 | -1.172282699 | 0.176237141 | -6.651734665 | 2.90E-11    | 9.40E-10    |
| ENSMUSG00000002908 | 45.48982961 | -1.172051804 | 0.467909333 | -2.504869475 | 0.012249659 | 0.05072032  |
| ENSMUSG00000053964 | 48441.22534 | -1.17176435  | 0.120574869 | -9.718147439 | 2.52E-22    | 2.46E-20    |
| ENSMUSG00000006362 | 775.7192241 | -1.171714687 | 0.205634068 | -5.698057238 | 1.21E-08    | 2.65E-07    |
| ENSMUSG00000049858 | 606.2711825 | -1.171548588 | 0.158681146 | -7.383035842 | 1.55E-13    | 6.49E-12    |
| ENSMUSG00000085881 | 48.35105871 | -1.171020507 | 0.432488051 | -2.707636673 | 0.006776416 | 0.031808221 |
| ENSMUSG00000085826 | 32.31632675 | -1.17092245  | 0.526619397 | -2.223470038 | 0.026184122 | 0.092292097 |

|                    |             |              |             |              |             |             |
|--------------------|-------------|--------------|-------------|--------------|-------------|-------------|
| ENSMUSG00000032181 | 53.68655635 | -1.167410612 | 0.342551269 | -3.407987991 | 0.000654438 | 0.004653895 |
| ENSMUSG00000103731 | 19.1201751  | -1.166567736 | 0.573035097 | -2.035770133 | 0.041773443 | 0.132271695 |
| ENSMUSG00000066191 | 220.4256164 | -1.166008533 | 0.242201047 | -4.81421756  | 1.48E-06    | 2.14E-05    |
| ENSMUSG00000029335 | 1108.687027 | -1.165491178 | 0.186098383 | -6.26276897  | 3.78E-10    | 1.05E-08    |
| ENSMUSG00000054752 | 1547.374132 | -1.164940628 | 0.123552944 | -9.428675616 | 4.15E-21    | 3.70E-19    |
| ENSMUSG00000022683 | 33.79894736 | -1.162405266 | 0.432612763 | -2.686941687 | 0.007210954 | 0.033404962 |
| ENSMUSG00000031448 | 47.82284745 | -1.161762434 | 0.360503148 | -3.222613841 | 0.001270267 | 0.0080886   |
| ENSMUSG00000080877 | 20.26968733 | -1.161295423 | 0.583814567 | -1.989151159 | 0.046684521 | 0.143815826 |
| ENSMUSG00000053550 | 377.0625503 | -1.161122769 | 0.235465087 | -4.93118867  | 8.17E-07    | 1.26E-05    |
| ENSMUSG00000032251 | 19.62720996 | -1.159685065 | 0.557612166 | -2.079734151 | 0.037549924 | 0.121839204 |
| ENSMUSG00000097296 | 59.11457709 | -1.158611048 | 0.420560043 | -2.754924217 | 0.005870573 | 0.028251975 |
| ENSMUSG00000003341 | 100.5032873 | -1.158058978 | 0.322109743 | -3.595231136 | 0.000324104 | 0.002553211 |
| ENSMUSG00000097233 | 98.2637115  | -1.157742841 | 0.357552311 | -3.237967724 | 0.001203844 | 0.007732411 |
| ENSMUSG00000056724 | 5908.001929 | -1.154867925 | 0.125691637 | -9.188104738 | 4.00E-20    | 3.25E-18    |
| ENSMUSG00000046589 | 41.83491055 | -1.154752444 | 0.415918738 | -2.776389562 | 0.005496631 | 0.026805239 |
| ENSMUSG00000091366 | 22.31565655 | -1.153909609 | 0.527698337 | -2.186684187 | 0.028765587 | 0.099104179 |
| ENSMUSG00000070489 | 16.81239831 | -1.153639773 | 0.570227576 | -2.023121684 | 0.043060603 | 0.135233702 |
| ENSMUSG00000021559 | 69.49200054 | -1.152582618 | 0.328034424 | -3.513602635 | 0.000442074 | 0.003340794 |
| ENSMUSG00000023044 | 1543.650382 | -1.151325279 | 0.148936816 | -7.730293334 | 1.07E-14    | 5.22E-13    |
| ENSMUSG00000028838 | 579.358136  | -1.150637038 | 0.180132627 | -6.387721418 | 1.68E-10    | 4.94E-09    |
| ENSMUSG00000111063 | 17.91309192 | -1.148681782 | 0.551474526 | -2.082928091 | 0.037257779 | 0.121067423 |
| ENSMUSG00000025422 | 49.74633179 | -1.147870985 | 0.350689898 | -3.273179499 | 0.001063449 | 0.007004129 |
| ENSMUSG00000042784 | 57.38276615 | -1.14773461  | 0.380833945 | -3.013740306 | 0.002580486 | 0.014550548 |
| ENSMUSG00000030981 | 24.90041537 | -1.147182435 | 0.484812038 | -2.366241648 | 0.017969711 | 0.068538144 |
| ENSMUSG00000081030 | 185.8492284 | -1.146582734 | 0.260187281 | -4.40675935  | 1.05E-05    | 0.000124139 |
| ENSMUSG00000002668 | 37.31833653 | -1.145262147 | 0.393186787 | -2.912768655 | 0.003582399 | 0.018891246 |
| ENSMUSG00000021265 | 161.7830103 | -1.145069    | 0.246967902 | -4.636509398 | 3.54E-06    | 4.71E-05    |
| ENSMUSG00000027603 | 93.96303172 | -1.144922104 | 0.292371296 | -3.915986698 | 9.00E-05    | 0.000836963 |
| ENSMUSG00000055676 | 37.22351787 | -1.144127115 | 0.44754068  | -2.556476242 | 0.010573829 | 0.045312637 |

|                    |             |              |             |              |             |             |
|--------------------|-------------|--------------|-------------|--------------|-------------|-------------|
| ENSMUSG00000028003 | 1208.86828  | -1.142700096 | 0.152340026 | -7.500984014 | 6.33E-14    | 2.80E-12    |
| ENSMUSG00000041025 | 2932.913048 | -1.141813288 | 0.160378579 | -7.119487506 | 1.08E-12    | 4.21E-11    |
| ENSMUSG00000040249 | 14598.28177 | -1.14153991  | 0.136943841 | -8.335825141 | 7.70E-17    | 4.60E-15    |
| ENSMUSG00000031955 | 3479.73753  | -1.140744146 | 0.10573531  | -10.78867737 | 3.89E-27    | 5.26E-25    |
| ENSMUSG00000057706 | 498.9413194 | -1.138429729 | 0.202794737 | -5.613704502 | 1.98E-08    | 4.18E-07    |
| ENSMUSG00000046854 | 150.4926668 | -1.137328659 | 0.322647965 | -3.524983214 | 0.00042351  | 0.003216856 |
| ENSMUSG00000017167 | 454.0663461 | -1.136056617 | 0.202054404 | -5.622528358 | 1.88E-08    | 3.99E-07    |
| ENSMUSG00000074480 | 1083.957812 | -1.135524518 | 0.151443915 | -7.497987096 | 6.48E-14    | 2.86E-12    |
| ENSMUSG00000029771 | 53.64345746 | -1.134726053 | 0.390183271 | -2.908187354 | 0.003635305 | 0.019114836 |
| ENSMUSG00000005360 | 1852.947455 | -1.134339536 | 0.152354467 | -7.445397312 | 9.67E-14    | 4.19E-12    |
| ENSMUSG00000033697 | 4565.471936 | -1.133069042 | 0.104183266 | -10.87572975 | 1.50E-27    | 2.07E-25    |
| ENSMUSG00000030730 | 46.48519851 | -1.130327569 | 0.358359874 | -3.154168902 | 0.001609559 | 0.009855787 |
| ENSMUSG00000024538 | 388.4344932 | -1.129612651 | 0.192733919 | -5.860995596 | 4.60E-09    | 1.09E-07    |
| ENSMUSG00000035486 | 55.23274809 | -1.129299318 | 0.422118476 | -2.67531364  | 0.007465937 | 0.034386175 |
| ENSMUSG00000018740 | 372.0831166 | -1.129185802 | 0.171004322 | -6.603258835 | 4.02E-11    | 1.29E-09    |
| ENSMUSG00000040127 | 37.2973628  | -1.126789129 | 0.429138395 | -2.62570104  | 0.008647073 | 0.038667579 |
| ENSMUSG00000028860 | 359.9613657 | -1.125528087 | 0.22447699  | -5.014002051 | 5.33E-07    | 8.49E-06    |
| ENSMUSG00000057092 | 656.8791225 | -1.124579956 | 0.185796427 | -6.05275339  | 1.42E-09    | 3.62E-08    |
| ENSMUSG00000114858 | 31.75751343 | -1.122720635 | 0.445922053 | -2.517750863 | 0.011810683 | 0.049342458 |
| ENSMUSG00000047281 | 6612.755467 | -1.121470927 | 0.144039163 | -7.785875036 | 6.92E-15    | 3.42E-13    |
| ENSMUSG00000021719 | 43.12596789 | -1.120004003 | 0.422756746 | -2.649287123 | 0.008066177 | 0.03657662  |
| ENSMUSG00000102759 | 292.2500583 | -1.118821412 | 0.248944941 | -4.494252446 | 6.98E-06    | 8.67E-05    |
| ENSMUSG00000034224 | 33.79979004 | -1.118386093 | 0.485669741 | -2.302770789 | 0.021291743 | 0.078393125 |
| ENSMUSG00000100106 | 67.7827856  | -1.118341675 | 0.300448199 | -3.722244569 | 0.00019746  | 0.001657962 |
| ENSMUSG00000023484 | 208.3336145 | -1.117842106 | 0.317667049 | -3.518911101 | 0.000433322 | 0.003285791 |
| ENSMUSG00000022440 | 40.0755779  | -1.117768802 | 0.437748584 | -2.553449269 | 0.010666182 | 0.045611988 |
| ENSMUSG00000020674 | 2820.235516 | -1.117412678 | 0.445467936 | -2.508402035 | 0.012127859 | 0.050362346 |
| ENSMUSG00000045912 | 86.89723501 | -1.114219734 | 0.327413581 | -3.40309565  | 0.00066627  | 0.004727251 |
| ENSMUSG00000022129 | 127.2512499 | -1.113894239 | 0.258505211 | -4.308981751 | 1.64E-05    | 0.000186579 |

|                    |             |              |             |              |             |             |
|--------------------|-------------|--------------|-------------|--------------|-------------|-------------|
| ENSMUSG00000039716 | 49.77449941 | -1.112035152 | 0.368884367 | -3.014590079 | 0.002573268 | 0.014517189 |
| ENSMUSG00000029074 | 2459.39486  | -1.111885708 | 0.141931392 | -7.833966079 | 4.73E-15    | 2.39E-13    |
| ENSMUSG00000024912 | 421.6282376 | -1.111095125 | 0.296918505 | -3.742087836 | 0.000182498 | 0.001544463 |
| ENSMUSG00000032346 | 22.97289663 | -1.110438833 | 0.553147998 | -2.007489562 | 0.044697561 | 0.139198479 |
| ENSMUSG00000038295 | 42.41877046 | -1.110191305 | 0.377657519 | -2.939677482 | 0.00328554  | 0.017657379 |
| ENSMUSG00000000958 | 851.6234445 | -1.108717408 | 0.208767733 | -5.310769984 | 1.09E-07    | 2.03E-06    |
| ENSMUSG00000042589 | 147.2307945 | -1.107992016 | 0.278006486 | -3.98548981  | 6.73E-05    | 0.000653229 |
| ENSMUSG00000024143 | 1699.201109 | -1.107713356 | 0.124109606 | -8.925283005 | 4.45E-19    | 3.28E-17    |
| ENSMUSG00000075553 | 44.53885944 | -1.10757554  | 0.39974545  | -2.770702056 | 0.005593558 | 0.027159143 |
| ENSMUSG00000041073 | 187.3210674 | -1.107125606 | 0.265399025 | -4.171551149 | 3.03E-05    | 0.000319753 |
| ENSMUSG00000029847 | 1865.710832 | -1.106921127 | 0.121850096 | -9.08428603  | 1.04E-19    | 8.23E-18    |
| ENSMUSG00000046841 | 308.115717  | -1.106379157 | 0.210903858 | -5.245893392 | 1.56E-07    | 2.80E-06    |
| ENSMUSG00000111692 | 46.46582124 | -1.105346096 | 0.373569189 | -2.958879184 | 0.003087601 | 0.016821512 |
| ENSMUSG00000031442 | 2372.115914 | -1.105235479 | 0.139596664 | -7.917348762 | 2.43E-15    | 1.26E-13    |
| ENSMUSG00000074457 | 431.3467435 | -1.103689655 | 0.16423278  | -6.720276292 | 1.81E-11    | 6.06E-10    |
| ENSMUSG00000031451 | 3855.160004 | -1.103150676 | 0.190745993 | -5.783349153 | 7.32E-09    | 1.68E-07    |
| ENSMUSG00000080152 | 55.04357192 | -1.102455073 | 0.365433936 | -3.016838244 | 0.002554261 | 0.014428209 |
| ENSMUSG00000035164 | 173.4900619 | -1.101224833 | 0.266735919 | -4.128520969 | 3.65E-05    | 0.000378354 |
| ENSMUSG00000019796 | 72.03961534 | -1.100237788 | 0.296489116 | -3.710887612 | 0.000206534 | 0.00172506  |
| ENSMUSG00000070570 | 21.71143623 | -1.096918642 | 0.536768577 | -2.043559719 | 0.040997062 | 0.130480303 |
| ENSMUSG00000112719 | 49.42197842 | -1.094100889 | 0.359953767 | -3.039559491 | 0.002369244 | 0.01353741  |
| ENSMUSG00000108599 | 339.3506396 | -1.093386967 | 0.259113763 | -4.219717836 | 2.45E-05    | 0.000263527 |
| ENSMUSG00000047793 | 236.5917969 | -1.093189146 | 0.224972826 | -4.859205285 | 1.18E-06    | 1.75E-05    |
| ENSMUSG00000032892 | 1638.798813 | -1.093038464 | 0.116564556 | -9.377108308 | 6.78E-21    | 5.88E-19    |
| ENSMUSG00000042371 | 25.86704482 | -1.092491971 | 0.462811206 | -2.360556437 | 0.018247542 | 0.069328312 |
| ENSMUSG00000039713 | 1603.561375 | -1.090798715 | 0.124859473 | -8.736211109 | 2.41E-18    | 1.69E-16    |
| ENSMUSG00000085957 | 168.2247221 | -1.090417337 | 0.24522883  | -4.446529956 | 8.73E-06    | 0.000105256 |
| ENSMUSG00000002020 | 24.28692321 | -1.08967459  | 0.512891745 | -2.124570342 | 0.033622481 | 0.111935684 |
| ENSMUSG00000103593 | 874.2337968 | -1.089539785 | 0.230109867 | -4.734867748 | 2.19E-06    | 3.06E-05    |

|                    |             |              |             |              |             |             |
|--------------------|-------------|--------------|-------------|--------------|-------------|-------------|
| ENSMUSG00000028664 | 10574.4231  | -1.088892707 | 0.094977382 | -11.4647581  | 1.98E-30    | 3.53E-28    |
| ENSMUSG00000034825 | 110.78743   | -1.087642254 | 0.280133937 | -3.882579397 | 0.000103354 | 0.000943086 |
| ENSMUSG00000068877 | 200.3462007 | -1.087478433 | 0.210303221 | -5.171002276 | 2.33E-07    | 4.03E-06    |
| ENSMUSG00000037306 | 27.18855317 | -1.086892555 | 0.515337219 | -2.109089962 | 0.034936817 | 0.115306491 |
| ENSMUSG00000085133 | 1211.085964 | -1.086829234 | 0.200322714 | -5.425391914 | 5.78E-08    | 1.14E-06    |
| ENSMUSG00000034161 | 61.84416573 | -1.085953725 | 0.379314981 | -2.862933918 | 0.004197381 | 0.021518573 |
| ENSMUSG00000038456 | 33.57118206 | -1.085809965 | 0.46419482  | -2.339125554 | 0.019328937 | 0.072522732 |
| ENSMUSG00000009108 | 162.8584785 | -1.085808125 | 0.218090319 | -4.978708502 | 6.40E-07    | 1.00E-05    |
| ENSMUSG00000109163 | 31.05206609 | -1.085734661 | 0.470259779 | -2.308797623 | 0.020954814 | 0.07734502  |
| ENSMUSG00000103183 | 145.1557015 | -1.085714512 | 0.229937459 | -4.721781814 | 2.34E-06    | 3.24E-05    |
| ENSMUSG00000044461 | 3941.724632 | -1.084271914 | 0.127280127 | -8.518784064 | 1.61E-17    | 1.05E-15    |
| ENSMUSG00000043432 | 1697.801637 | -1.083490597 | 0.1988086   | -5.449918145 | 5.04E-08    | 9.98E-07    |
| ENSMUSG00000048807 | 76.56363357 | -1.082778134 | 0.31634813  | -3.422742322 | 0.000619928 | 0.004443914 |
| ENSMUSG00000082264 | 28.42588761 | -1.082521179 | 0.454596773 | -2.381277745 | 0.017252698 | 0.066370955 |
| ENSMUSG00000032899 | 3448.284638 | -1.082268681 | 0.128273238 | -8.437213371 | 3.25E-17    | 2.05E-15    |
| ENSMUSG00000025575 | 5449.692005 | -1.082220857 | 0.122418138 | -8.840363647 | 9.54E-19    | 6.91E-17    |
| ENSMUSG00000103309 | 29.72637127 | -1.081437777 | 0.515740777 | -2.096863047 | 0.036005701 | 0.118169702 |
| ENSMUSG00000062309 | 126.5427833 | -1.081210027 | 0.25939993  | -4.168119958 | 3.07E-05    | 0.000323836 |
| ENSMUSG00000001095 | 101.1418772 | -1.080905133 | 0.364605296 | -2.964589772 | 0.003030868 | 0.016586843 |
| ENSMUSG00000051111 | 55.54835631 | -1.080676135 | 0.385919245 | -2.800264951 | 0.005106068 | 0.025254029 |
| ENSMUSG00000038057 | 24.07556862 | -1.078943688 | 0.488808959 | -2.207291149 | 0.027293725 | 0.095284497 |
| ENSMUSG00000023473 | 200.2781452 | -1.078830974 | 0.256152924 | -4.211667617 | 2.53E-05    | 0.00027244  |
| ENSMUSG00000051435 | 146.9335706 | -1.078030341 | 0.249805219 | -4.315483666 | 1.59E-05    | 0.000182223 |
| ENSMUSG00000040274 | 11652.75417 | -1.077778847 | 0.151588088 | -7.109917827 | 1.16E-12    | 4.48E-11    |
| ENSMUSG00000097041 | 33.70750585 | -1.077687377 | 0.454474624 | -2.371281741 | 0.017726513 | 0.067749608 |
| ENSMUSG00000097017 | 39.17324496 | -1.077521398 | 0.482133378 | -2.234903135 | 0.025423709 | 0.09019633  |
| ENSMUSG00000101828 | 223.77697   | -1.077190697 | 0.304379067 | -3.538977593 | 0.00040168  | 0.003074078 |
| ENSMUSG00000110962 | 23.54117995 | -1.076921314 | 0.529884502 | -2.032369902 | 0.042116223 | 0.132998284 |
| ENSMUSG00000034911 | 33.72121577 | -1.074479873 | 0.43986674  | -2.442739528 | 0.014576253 | 0.058318088 |

|                    |             |              |             |              |             |             |
|--------------------|-------------|--------------|-------------|--------------|-------------|-------------|
| ENSMUSG00000114515 | 159.4202545 | -1.074353379 | 0.216696554 | -4.957870171 | 7.13E-07    | 1.11E-05    |
| ENSMUSG00000018554 | 380.3582248 | -1.072080911 | 0.154928109 | -6.919860572 | 4.52E-12    | 1.63E-10    |
| ENSMUSG00000026976 | 60.75672847 | -1.071482238 | 0.341824483 | -3.134597701 | 0.001720899 | 0.010406122 |
| ENSMUSG00000109621 | 126.9617401 | -1.07067821  | 0.269495646 | -3.972896129 | 7.10E-05    | 0.00068282  |
| ENSMUSG00000079043 | 254.1066119 | -1.070176467 | 0.308016553 | -3.47441219  | 0.000511974 | 0.003784398 |
| ENSMUSG00000042306 | 35.62669645 | -1.06791883  | 0.439123038 | -2.431935332 | 0.015018388 | 0.059582637 |
| ENSMUSG00000090236 | 33.08959295 | -1.065867442 | 0.431733801 | -2.468807026 | 0.01355643  | 0.054957635 |
| ENSMUSG00000045312 | 102.8885667 | -1.06448178  | 0.312918537 | -3.401785625 | 0.000669471 | 0.004737891 |
| ENSMUSG00000031775 | 524.2148234 | -1.063390251 | 0.168986495 | -6.292752888 | 3.12E-10    | 8.78E-09    |
| ENSMUSG00000025347 | 283.2113613 | -1.062592385 | 0.252965025 | -4.200550583 | 2.66E-05    | 0.000284524 |
| ENSMUSG00000108784 | 28.41087556 | -1.060425366 | 0.452008564 | -2.34602937  | 0.018974612 | 0.071478518 |
| ENSMUSG00000045467 | 224.017238  | -1.060071354 | 0.286776483 | -3.696507274 | 0.000218586 | 0.001814174 |
| ENSMUSG00000038967 | 2213.583836 | -1.059440635 | 0.184565767 | -5.740179522 | 9.46E-09    | 2.12E-07    |
| ENSMUSG00000071711 | 1264.875917 | -1.058900983 | 0.160926456 | -6.580030463 | 4.70E-11    | 1.48E-09    |
| ENSMUSG00000102717 | 28.7473308  | -1.058078465 | 0.528897839 | -2.000534673 | 0.04544256  | 0.14095376  |
| ENSMUSG00000020312 | 55.55199068 | -1.057809536 | 0.419705986 | -2.52035847  | 0.011723537 | 0.049051896 |
| ENSMUSG00000029130 | 1313.404306 | -1.057737954 | 0.167031205 | -6.33257691  | 2.41E-10    | 6.89E-09    |
| ENSMUSG00000035852 | 10607.78701 | -1.057539284 | 0.111506793 | -9.484079451 | 2.45E-21    | 2.21E-19    |
| ENSMUSG00000000394 | 271.9545991 | -1.056752934 | 0.269396848 | -3.922662585 | 8.76E-05    | 0.000817508 |
| ENSMUSG00000025026 | 16311.08539 | -1.055926431 | 0.114868339 | -9.192493239 | 3.84E-20    | 3.14E-18    |
| ENSMUSG00000097316 | 120.0237183 | -1.05396867  | 0.244676175 | -4.307606457 | 1.65E-05    | 0.000187582 |
| ENSMUSG00000020173 | 2976.201001 | -1.053829646 | 0.148108713 | -7.115244095 | 1.12E-12    | 4.33E-11    |
| ENSMUSG00000006464 | 221.5678733 | -1.052063319 | 0.195807403 | -5.372949655 | 7.75E-08    | 1.50E-06    |
| ENSMUSG00000030403 | 9380.945579 | -1.051358915 | 0.098443141 | -10.6798595  | 1.26E-26    | 1.64E-24    |
| ENSMUSG00000027489 | 117.4690916 | -1.051036006 | 0.278040793 | -3.780150365 | 0.000156734 | 0.001350065 |
| ENSMUSG00000018378 | 634.5400078 | -1.050043667 | 0.137322912 | -7.646529273 | 2.06E-14    | 9.71E-13    |
| ENSMUSG00000030342 | 1966.469848 | -1.048903304 | 0.134097251 | -7.821959796 | 5.20E-15    | 2.61E-13    |
| ENSMUSG00000114995 | 143.5910085 | -1.048603032 | 0.34145395  | -3.070994    | 0.002133474 | 0.012409654 |
| ENSMUSG00000021763 | 49.58464857 | -1.048363408 | 0.408123245 | -2.568742214 | 0.010206835 | 0.044078745 |

|                    |             |              |             |              |             |             |
|--------------------|-------------|--------------|-------------|--------------|-------------|-------------|
| ENSMUSG00000073530 | 131.2529357 | -1.048267039 | 0.394652586 | -2.656176789 | 0.007903217 | 0.035976657 |
| ENSMUSG00000006462 | 363.4870684 | -1.048161097 | 0.198302781 | -5.285660088 | 1.25E-07    | 2.31E-06    |
| ENSMUSG00000074039 | 181.1404286 | -1.047812844 | 0.216452765 | -4.840838338 | 1.29E-06    | 1.90E-05    |
| ENSMUSG00000040183 | 33.59848262 | -1.047801964 | 0.504106102 | -2.07853458  | 0.037660149 | 0.122108024 |
| ENSMUSG00000041351 | 1730.83516  | -1.047749249 | 0.174287957 | -6.011598679 | 1.84E-09    | 4.62E-08    |
| ENSMUSG00000018381 | 320.8009379 | -1.046753764 | 0.231578531 | -4.520081207 | 6.18E-06    | 7.77E-05    |
| ENSMUSG00000034785 | 304.6596866 | -1.045214034 | 0.244709608 | -4.271242322 | 1.94E-05    | 0.000215995 |
| ENSMUSG00000053461 | 69.83898581 | -1.044902634 | 0.32457062  | -3.219338316 | 0.001284868 | 0.008147239 |
| ENSMUSG00000061414 | 1764.677444 | -1.044018013 | 0.371537865 | -2.809990882 | 0.00495429  | 0.024678497 |
| ENSMUSG00000063903 | 1095.28982  | -1.043140151 | 0.245303085 | -4.252454264 | 2.11E-05    | 0.000232511 |
| ENSMUSG00000110622 | 6945.633117 | -1.042760021 | 0.152209849 | -6.850805158 | 7.34E-12    | 2.57E-10    |
| ENSMUSG00000032500 | 69.12046314 | -1.042545646 | 0.402241341 | -2.591841113 | 0.009546385 | 0.041824462 |
| ENSMUSG00000031893 | 38.35734104 | -1.042202291 | 0.444310107 | -2.345664151 | 0.018993213 | 0.071536505 |
| ENSMUSG00000044320 | 151.145041  | -1.041442872 | 0.242334394 | -4.297544632 | 1.73E-05    | 0.000195403 |
| ENSMUSG00000025854 | 694.2473601 | -1.041123347 | 0.189486923 | -5.494433757 | 3.92E-08    | 7.88E-07    |
| ENSMUSG00000028909 | 119.5198355 | -1.039653953 | 0.259135425 | -4.012010147 | 6.02E-05    | 0.000590157 |
| ENSMUSG00000110218 | 222.4781917 | -1.039306831 | 0.22927934  | -4.532928405 | 5.82E-06    | 7.38E-05    |
| ENSMUSG00000078695 | 1474.354053 | -1.038929463 | 0.140419968 | -7.398730226 | 1.37E-13    | 5.79E-12    |
| ENSMUSG00000108649 | 201.8017388 | -1.037512895 | 0.283304353 | -3.662184794 | 0.000250073 | 0.002030913 |
| ENSMUSG00000113068 | 39.20725345 | -1.034737226 | 0.43584323  | -2.374104161 | 0.017591587 | 0.067360918 |
| ENSMUSG00000107240 | 462.6486325 | -1.033854264 | 0.278174349 | -3.716569368 | 0.000201946 | 0.001691176 |
| ENSMUSG00000085651 | 160.5263494 | -1.033739018 | 0.290027372 | -3.564280887 | 0.000364855 | 0.002830133 |
| ENSMUSG00000036306 | 58.84811164 | -1.033633448 | 0.344082019 | -3.004032152 | 0.002664272 | 0.014947402 |
| ENSMUSG00000110030 | 95.52621749 | -1.033373664 | 0.311691908 | -3.315368917 | 0.000915223 | 0.006188714 |
| ENSMUSG00000034255 | 3616.520074 | -1.033068081 | 0.100917698 | -10.23673848 | 1.36E-24    | 1.55E-22    |
| ENSMUSG00000032946 | 173.0668362 | -1.032650669 | 0.239035643 | -4.320069827 | 1.56E-05    | 0.000178591 |
| ENSMUSG00000089762 | 1947.085679 | -1.0309512   | 0.172199913 | -5.986943784 | 2.14E-09    | 5.33E-08    |
| ENSMUSG00000029138 | 21.92541184 | -1.030571569 | 0.518516105 | -1.987540135 | 0.046862573 | 0.144248756 |
| ENSMUSG00000062044 | 29.54815816 | -1.030383971 | 0.464214643 | -2.219628325 | 0.026444008 | 0.093070808 |

|                    |             |              |             |              |             |             |
|--------------------|-------------|--------------|-------------|--------------|-------------|-------------|
| ENSMUSG00000103403 | 36.00279006 | -1.028856675 | 0.430860579 | -2.387910903 | 0.016944449 | 0.065410794 |
| ENSMUSG00000070331 | 103.028953  | -1.027741003 | 0.33698877  | -3.049778197 | 0.002290104 | 0.013162787 |
| ENSMUSG00000090700 | 526.4102542 | -1.027733779 | 0.220485529 | -4.661230087 | 3.14E-06    | 4.23E-05    |
| ENSMUSG00000035735 | 1237.036839 | -1.027728343 | 0.131342443 | -7.824799949 | 5.08E-15    | 2.56E-13    |
| ENSMUSG00000113796 | 81.15369408 | -1.027692241 | 0.309722248 | -3.318109195 | 0.00090629  | 0.006139485 |
| ENSMUSG00000103009 | 120.8433982 | -1.027129355 | 0.271585743 | -3.78197082  | 0.000155592 | 0.001341782 |
| ENSMUSG00000045942 | 118.3690516 | -1.02665524  | 0.330449528 | -3.106844322 | 0.00189096  | 0.01124541  |
| ENSMUSG00000028671 | 4131.955981 | -1.026506359 | 0.098775144 | -10.392355   | 2.69E-25    | 3.24E-23    |
| ENSMUSG00000043639 | 227.2281498 | -1.026152553 | 0.224306605 | -4.574776364 | 4.77E-06    | 6.19E-05    |
| ENSMUSG00000078794 | 70.94356217 | -1.026044508 | 0.362592086 | -2.829748768 | 0.004658457 | 0.023403525 |
| ENSMUSG00000039693 | 197.627663  | -1.025843518 | 0.188036581 | -5.455552913 | 4.88E-08    | 9.70E-07    |
| ENSMUSG00000086141 | 121.2518155 | -1.024361949 | 0.340477226 | -3.008606364 | 0.002624489 | 0.014766423 |
| ENSMUSG00000053198 | 493.6458751 | -1.024009554 | 0.166998534 | -6.131847556 | 8.69E-10    | 2.28E-08    |
| ENSMUSG00000110557 | 81.32352434 | -1.023813789 | 0.446718827 | -2.291852788 | 0.021914139 | 0.080129074 |
| ENSMUSG00000113853 | 92.80061747 | -1.023643029 | 0.271932358 | -3.764329616 | 0.000166996 | 0.001428534 |
| ENSMUSG00000033029 | 37.97019268 | -1.022601034 | 0.41563951  | -2.460307571 | 0.013881799 | 0.056103299 |
| ENSMUSG00000078670 | 1218.741007 | -1.021307287 | 0.120769732 | -8.456649462 | 2.75E-17    | 1.74E-15    |
| ENSMUSG00000036655 | 22.31205822 | -1.021195293 | 0.498324956 | -2.049255771 | 0.040437111 | 0.129085029 |
| ENSMUSG00000032198 | 1637.391996 | -1.019073983 | 0.11890539  | -8.570460758 | 1.03E-17    | 6.86E-16    |
| ENSMUSG00000059434 | 71.66519241 | -1.018995246 | 0.297526844 | -3.424885071 | 0.00061506  | 0.00441469  |
| ENSMUSG00000101702 | 92.60734688 | -1.018621463 | 0.294615405 | -3.457461647 | 0.00054529  | 0.003983051 |
| ENSMUSG00000066640 | 5272.984929 | -1.018457527 | 0.144854992 | -7.030876265 | 2.05E-12    | 7.67E-11    |
| ENSMUSG00000023827 | 598.3720022 | -1.018272364 | 0.214468634 | -4.747884783 | 2.06E-06    | 2.89E-05    |
| ENSMUSG00000020932 | 25.51571217 | -1.017759823 | 0.504906737 | -2.015738252 | 0.043827353 | 0.137043439 |
| ENSMUSG00000044952 | 348.7999923 | -1.017544682 | 0.176278456 | -5.772371207 | 7.82E-09    | 1.78E-07    |
| ENSMUSG00000041423 | 45.91404251 | -1.017272057 | 0.369265678 | -2.754851366 | 0.00587188  | 0.028252169 |
| ENSMUSG00000035606 | 929.2699379 | -1.016809376 | 0.203600538 | -4.994138951 | 5.91E-07    | 9.29E-06    |
| ENSMUSG00000074259 | 188.5619497 | -1.016526515 | 0.212042258 | -4.793980814 | 1.64E-06    | 2.36E-05    |
| ENSMUSG00000028497 | 31.422679   | -1.0164248   | 0.440177562 | -2.309124514 | 0.020936673 | 0.077302772 |



|                    |             |              |             |              |             |             |
|--------------------|-------------|--------------|-------------|--------------|-------------|-------------|
| ENSMUSG00000030098 | 78.80284223 | -1.01526623  | 0.289037121 | -3.512580758 | 0.000443777 | 0.003346863 |
| ENSMUSG00000019982 | 21523.53695 | -1.012517256 | 0.098746095 | -10.25374478 | 1.14E-24    | 1.32E-22    |
| ENSMUSG00000085307 | 72.57566512 | -1.012173126 | 0.322449987 | -3.139008113 | 0.001695208 | 0.010278508 |
| ENSMUSG00000054256 | 5727.758164 | -1.012030056 | 0.10008645  | -10.11155911 | 4.91E-24    | 5.47E-22    |
| ENSMUSG00000048478 | 40.1211055  | -1.012024765 | 0.400422993 | -2.527389245 | 0.011491406 | 0.04832346  |
| ENSMUSG00000051579 | 99.55761163 | -1.010018361 | 0.31660808  | -3.19012187  | 0.001422128 | 0.00887626  |
| ENSMUSG00000002771 | 212.0312499 | -1.008608266 | 0.206805845 | -4.877078142 | 1.08E-06    | 1.61E-05    |
| ENSMUSG00000021194 | 1561.095626 | -1.008553741 | 0.414352691 | -2.434046557 | 0.014931074 | 0.059396698 |
| ENSMUSG00000025359 | 109.8922223 | -1.008326308 | 0.266495098 | -3.783658    | 0.00015454  | 0.001333746 |
| ENSMUSG00000045826 | 41.50201303 | -1.007915622 | 0.454060546 | -2.21978243  | 0.02643354  | 0.093068263 |
| ENSMUSG00000001901 | 203.5807683 | -1.007249099 | 0.239641596 | -4.203148023 | 2.63E-05    | 0.000281682 |
| ENSMUSG00000038670 | 123.8878704 | -1.007033407 | 0.235028045 | -4.284737202 | 1.83E-05    | 0.000205339 |
| ENSMUSG00000096953 | 53.419674   | -1.006949473 | 0.365102141 | -2.757993888 | 0.005815729 | 0.028052598 |
| ENSMUSG00000073598 | 384.9853947 | -1.006025627 | 0.181801735 | -5.533641495 | 3.14E-08    | 6.38E-07    |
| ENSMUSG00000004347 | 100.5799437 | -1.00600967  | 0.338602528 | -2.971063671 | 0.002967702 | 0.016289129 |
| ENSMUSG00000033949 | 896.1199171 | -1.005483566 | 0.131037256 | -7.673264803 | 1.68E-14    | 7.92E-13    |
| ENSMUSG00000044628 | 39.36477337 | -1.004698926 | 0.40548423  | -2.477775587 | 0.013220427 | 0.053889369 |
| ENSMUSG00000114360 | 29.75009487 | -1.004200019 | 0.450202227 | -2.2305532   | 0.02571074  | 0.090954189 |
| ENSMUSG00000047528 | 38.73424261 | -1.003134163 | 0.430691687 | -2.329123578 | 0.01985252  | 0.074049716 |
| ENSMUSG00000027230 | 1500.460842 | -1.002907097 | 0.182417096 | -5.497878877 | 3.84E-08    | 7.74E-07    |
| ENSMUSG00000021278 | 762.6846357 | -1.002794059 | 0.174514618 | -5.74618946  | 9.13E-09    | 2.06E-07    |
| ENSMUSG00000035773 | 110.1104869 | -1.0026847   | 0.334737853 | -2.995432668 | 0.002740558 | 0.015298419 |
| ENSMUSG00000040412 | 4033.059447 | -1.002134656 | 0.181252331 | -5.528947696 | 3.22E-08    | 6.54E-07    |
| ENSMUSG00000103791 | 142.4410655 | -1.001553639 | 0.251518825 | -3.982022568 | 6.83E-05    | 0.000661109 |
| ENSMUSG00000053552 | 25.20240564 | -1.00116768  | 0.478964708 | -2.090274425 | 0.036593155 | 0.119534782 |
| ENSMUSG00000085184 | 75.73142715 | -1.001136093 | 0.296264902 | -3.379192362 | 0.000726991 | 0.005072788 |
| ENSMUSG00000004654 | 59.51451419 | -1.000196683 | 0.359443888 | -2.78262259  | 0.005392149 | 0.02639963  |
| ENSMUSG00000106658 | 135.3748343 | -0.999408526 | 0.290170759 | -3.444208258 | 0.000572734 | 0.00415118  |
| ENSMUSG00000032532 | 415.1479769 | -0.997766763 | 0.224279363 | -4.448767598 | 8.64E-06    | 0.000104278 |

|                    |             |              |             |              |             |             |
|--------------------|-------------|--------------|-------------|--------------|-------------|-------------|
| ENSMUSG00000104156 | 512.9729434 | -0.997394657 | 0.258193565 | -3.862972559 | 0.000112016 | 0.001010951 |
| ENSMUSG00000056973 | 1593.016832 | -0.992636897 | 0.460214639 | -2.156899871 | 0.031013467 | 0.105079205 |
| ENSMUSG00000097861 | 122.0088798 | -0.99256883  | 0.230124887 | -4.313174652 | 1.61E-05    | 0.000183666 |
| ENSMUSG00000074364 | 68.92478549 | -0.992477685 | 0.349385253 | -2.840639884 | 0.004502312 | 0.022747183 |
| ENSMUSG00000021097 | 3816.092959 | -0.992434247 | 0.119196804 | -8.32601391  | 8.36E-17    | 4.95E-15    |
| ENSMUSG00000068452 | 3176.562113 | -0.992324832 | 0.390852346 | -2.538873927 | 0.011120989 | 0.047150702 |
| ENSMUSG00000021457 | 1195.832841 | -0.992103719 | 0.14380367  | -6.899015289 | 5.24E-12    | 1.87E-10    |
| ENSMUSG00000016024 | 101.7499244 | -0.991729312 | 0.410158538 | -2.417917025 | 0.015609636 | 0.061405978 |
| ENSMUSG00000031165 | 23.59857214 | -0.991721561 | 0.492698297 | -2.012837402 | 0.044131738 | 0.137802    |
| ENSMUSG00000033405 | 92.54855166 | -0.990906004 | 0.303502503 | -3.26490225  | 0.001095019 | 0.007180244 |
| ENSMUSG00000006587 | 114.3271475 | -0.988976735 | 0.265509757 | -3.724822563 | 0.000195453 | 0.001642966 |
| ENSMUSG00000053886 | 3252.903786 | -0.98893787  | 0.134432953 | -7.356364992 | 1.89E-13    | 7.83E-12    |
| ENSMUSG00000078238 | 26.70156748 | -0.988380504 | 0.503171188 | -1.96430266  | 0.049495003 | 0.15003236  |
| ENSMUSG00000097727 | 33.3814674  | -0.988089993 | 0.42964012  | -2.299808487 | 0.021459072 | 0.078839996 |
| ENSMUSG00000039878 | 4109.632651 | -0.987310742 | 0.173490628 | -5.690859226 | 1.26E-08    | 2.76E-07    |
| ENSMUSG00000055216 | 41.72963333 | -0.98690215  | 0.418809453 | -2.356446692 | 0.018450716 | 0.069965757 |
| ENSMUSG00000028348 | 36.66631658 | -0.986883063 | 0.428693702 | -2.302070356 | 0.021331205 | 0.078525454 |
| ENSMUSG00000048779 | 515.2671034 | -0.986774197 | 0.18899671  | -5.221118372 | 1.78E-07    | 3.17E-06    |
| ENSMUSG00000023995 | 107.0018564 | -0.986408538 | 0.250948948 | -3.930713985 | 8.47E-05    | 0.000795268 |
| ENSMUSG00000071332 | 50.83630055 | -0.984746181 | 0.335667665 | -2.933693897 | 0.003349544 | 0.017947663 |
| ENSMUSG00000042439 | 535.5656829 | -0.984739918 | 0.154864403 | -6.358723511 | 2.03E-10    | 5.89E-09    |
| ENSMUSG00000078129 | 27.08090802 | -0.984546153 | 0.495862034 | -1.985524373 | 0.047086161 | 0.144697324 |
| ENSMUSG00000101210 | 43.14649563 | -0.983739329 | 0.437738252 | -2.247323199 | 0.024619379 | 0.087944382 |
| ENSMUSG00000062758 | 39.19851203 | -0.983569505 | 0.464025766 | -2.119644161 | 0.034036065 | 0.112985754 |
| ENSMUSG00000097850 | 36.13843099 | -0.982252089 | 0.424114369 | -2.31600757  | 0.020557855 | 0.076156268 |
| ENSMUSG00000049608 | 629.6888897 | -0.97930476  | 0.219320793 | -4.465170612 | 8.00E-06    | 9.76E-05    |
| ENSMUSG00000048240 | 39.9448664  | -0.978377666 | 0.476233579 | -2.054407142 | 0.039936302 | 0.127925809 |
| ENSMUSG00000000308 | 8559.195954 | -0.978356643 | 0.117691139 | -8.312916754 | 9.34E-17    | 5.47E-15    |
| ENSMUSG00000104012 | 666.2108217 | -0.977618839 | 0.192648747 | -5.074618218 | 3.88E-07    | 6.40E-06    |

|                    |             |              |             |              |             |             |
|--------------------|-------------|--------------|-------------|--------------|-------------|-------------|
| ENSMUSG00000024935 | 1717.776176 | -0.977131013 | 0.165972118 | -5.887320258 | 3.93E-09    | 9.42E-08    |
| ENSMUSG00000020886 | 199.9220744 | -0.974327417 | 0.253823365 | -3.838604135 | 0.000123736 | 0.00110289  |
| ENSMUSG00000037852 | 295.1541986 | -0.973959034 | 0.194569004 | -5.005725558 | 5.57E-07    | 8.81E-06    |
| ENSMUSG00000050936 | 155.1263755 | -0.973879809 | 0.297895924 | -3.269194807 | 0.00107854  | 0.007086778 |
| ENSMUSG00000038651 | 284.0343454 | -0.973665436 | 0.247523955 | -3.933621036 | 8.37E-05    | 0.000786699 |
| ENSMUSG00000065400 | 178.9383964 | -0.973076061 | 0.235714102 | -4.128204685 | 3.66E-05    | 0.000378699 |
| ENSMUSG00000031849 | 53.16740237 | -0.972883316 | 0.396378692 | -2.454428899 | 0.014110857 | 0.05682308  |
| ENSMUSG00000103108 | 104.161274  | -0.972726477 | 0.336479389 | -2.890894681 | 0.003841468 | 0.019978681 |
| ENSMUSG00000032128 | 30.26632782 | -0.971770768 | 0.491599008 | -1.976754941 | 0.048069337 | 0.146848533 |
| ENSMUSG00000046959 | 36.61206013 | -0.968847502 | 0.446085024 | -2.171889773 | 0.029863978 | 0.101912253 |
| ENSMUSG00000042750 | 38.06526848 | -0.966178679 | 0.439130344 | -2.200209327 | 0.027792047 | 0.096564543 |
| ENSMUSG00000046108 | 75.85581998 | -0.966035136 | 0.329037389 | -2.935943356 | 0.00332535  | 0.017843753 |
| ENSMUSG0000004665  | 217.8737885 | -0.96581185  | 0.268814679 | -3.592853838 | 0.000327076 | 0.002572883 |
| ENSMUSG00000098207 | 1271.842222 | -0.965438727 | 0.161930206 | -5.962066928 | 2.49E-09    | 6.14E-08    |
| ENSMUSG00000022519 | 1020.434183 | -0.964501525 | 0.182633179 | -5.281085993 | 1.28E-07    | 2.36E-06    |
| ENSMUSG00000064125 | 27.44197766 | -0.963824528 | 0.475086964 | -2.028732846 | 0.042485509 | 0.133814065 |
| ENSMUSG00000020758 | 7926.982811 | -0.962219007 | 0.126619457 | -7.599298157 | 2.98E-14    | 1.36E-12    |
| ENSMUSG00000101849 | 29.74295815 | -0.961646224 | 0.464209062 | -2.071580032 | 0.038304624 | 0.123855504 |
| ENSMUSG00000034981 | 731.645595  | -0.96114565  | 0.182048514 | -5.279612713 | 1.29E-07    | 2.37E-06    |
| ENSMUSG00000087547 | 27.60701277 | -0.959985819 | 0.480523375 | -1.997792133 | 0.045739201 | 0.141651147 |
| ENSMUSG00000114796 | 47.56402903 | -0.959512903 | 0.3808219   | -2.519584358 | 0.011749348 | 0.049132236 |
| ENSMUSG00000081333 | 46.98156386 | -0.958560072 | 0.411517044 | -2.329332616 | 0.019841452 | 0.074031155 |
| ENSMUSG00000055485 | 1498.685089 | -0.9583765   | 0.127408268 | -7.522090327 | 5.39E-14    | 2.41E-12    |
| ENSMUSG00000001763 | 113.3636085 | -0.958013107 | 0.241561945 | -3.965910721 | 7.31E-05    | 0.000701017 |
| ENSMUSG00000020773 | 59.15878608 | -0.957894034 | 0.324152848 | -2.955069008 | 0.003125991 | 0.016974125 |
| ENSMUSG00000032496 | 46.12999025 | -0.957784443 | 0.48047016  | -1.993431691 | 0.046214197 | 0.142706009 |
| ENSMUSG00000037408 | 5983.836843 | -0.957041214 | 0.112458196 | -8.510195294 | 1.74E-17    | 1.12E-15    |
| ENSMUSG00000071847 | 189.5394418 | -0.955928078 | 0.226430726 | -4.221724217 | 2.42E-05    | 0.000261824 |
| ENSMUSG00000033200 | 168.4485372 | -0.954232366 | 0.223183554 | -4.275549657 | 1.91E-05    | 0.000212304 |

|                    |             |              |             |              |             |             |
|--------------------|-------------|--------------|-------------|--------------|-------------|-------------|
| ENSMUSG00000087589 | 99.89362237 | -0.9528157   | 0.26362566  | -3.61427526  | 0.000301189 | 0.002398006 |
| ENSMUSG00000052160 | 58.74264375 | -0.952472705 | 0.346221198 | -2.751052536 | 0.005940412 | 0.028489703 |
| ENSMUSG00000114388 | 32.92404256 | -0.95179528  | 0.431738796 | -2.204562777 | 0.02748479  | 0.095726738 |
| ENSMUSG00000031844 | 136.187048  | -0.951203102 | 0.319624391 | -2.976002858 | 0.002920321 | 0.016076546 |
| ENSMUSG00000108854 | 27.77359692 | -0.950607526 | 0.462434459 | -2.055658932 | 0.039815403 | 0.127611858 |
| ENSMUSG00000053297 | 44.92664391 | -0.950378203 | 0.379932742 | -2.501438014 | 0.012369009 | 0.051088959 |
| ENSMUSG00000072494 | 674.7494592 | -0.95008285  | 0.166039157 | -5.722040923 | 1.05E-08    | 2.33E-07    |
| ENSMUSG00000082305 | 68.59415005 | -0.949922361 | 0.320245899 | -2.966228029 | 0.003014769 | 0.01650684  |
| ENSMUSG00000025555 | 9452.176838 | -0.949705357 | 0.110915096 | -8.562453524 | 1.10E-17    | 7.27E-16    |
| ENSMUSG00000039021 | 69.90050228 | -0.949645225 | 0.359854392 | -2.638970783 | 0.008315815 | 0.037531273 |
| ENSMUSG00000030491 | 58.61875737 | -0.947129423 | 0.356716589 | -2.655131415 | 0.007927752 | 0.036051548 |
| ENSMUSG00000110697 | 231.1483474 | -0.946156402 | 0.188771807 | -5.012170064 | 5.38E-07    | 8.56E-06    |
| ENSMUSG00000020599 | 49.56293347 | -0.946081006 | 0.372964421 | -2.536652168 | 0.011191809 | 0.047369242 |
| ENSMUSG00000056771 | 66.48758348 | -0.945995368 | 0.34368436  | -2.752512122 | 0.005913996 | 0.028381325 |
| ENSMUSG00000086665 | 78.86510056 | -0.945167898 | 0.293501384 | -3.220318368 | 0.001280483 | 0.00813331  |
| ENSMUSG00000054191 | 31.25476164 | -0.943448481 | 0.445973278 | -2.115482088 | 0.03438888  | 0.113953405 |
| ENSMUSG00000076441 | 543.2245434 | -0.94288137  | 0.196723482 | -4.792927417 | 1.64E-06    | 2.37E-05    |
| ENSMUSG00000043587 | 1914.250822 | -0.942408309 | 0.139988418 | -6.732044835 | 1.67E-11    | 5.61E-10    |
| ENSMUSG00000019846 | 257.8105326 | -0.941987935 | 0.316446787 | -2.976765683 | 0.002913066 | 0.016052453 |
| ENSMUSG00000074653 | 2350.967331 | -0.94150391  | 0.185590579 | -5.073015634 | 3.92E-07    | 6.44E-06    |
| ENSMUSG00000086740 | 82.30773767 | -0.941000222 | 0.445293356 | -2.113214152 | 0.034582443 | 0.114441764 |
| ENSMUSG00000054074 | 46.74943143 | -0.939878092 | 0.354412432 | -2.651933191 | 0.008003238 | 0.036357751 |
| ENSMUSG00000097193 | 227.8968421 | -0.93972099  | 0.212046352 | -4.431677239 | 9.35E-06    | 0.000111988 |
| ENSMUSG00000048200 | 925.2406672 | -0.939404513 | 0.136984635 | -6.857736355 | 7.00E-12    | 2.46E-10    |
| ENSMUSG00000054277 | 3148.477929 | -0.939093839 | 0.14217899  | -6.605011311 | 3.97E-11    | 1.27E-09    |
| ENSMUSG00000026567 | 55.83866498 | -0.938528083 | 0.374189899 | -2.508159857 | 0.012136175 | 0.050381392 |
| ENSMUSG00000069805 | 1233.611356 | -0.937728706 | 0.195205658 | -4.803798808 | 1.56E-06    | 2.25E-05    |
| ENSMUSG00000048038 | 45.30757048 | -0.937520486 | 0.41342103  | -2.267713587 | 0.023346669 | 0.084289148 |
| ENSMUSG00000054619 | 691.7486253 | -0.937494713 | 0.183929162 | -5.097042278 | 3.45E-07    | 5.75E-06    |

|                    |             |              |             |              |             |             |
|--------------------|-------------|--------------|-------------|--------------|-------------|-------------|
| ENSMUSG00000110404 | 53.46442153 | -0.937380139 | 0.356331689 | -2.630639281 | 0.008522444 | 0.038256647 |
| ENSMUSG00000028347 | 416.9252867 | -0.935987517 | 0.196784784 | -4.756401875 | 1.97E-06    | 2.78E-05    |
| ENSMUSG00000049097 | 27.44665878 | -0.933360389 | 0.443760449 | -2.103297829 | 0.035439743 | 0.116552383 |
| ENSMUSG00000059149 | 362.0628708 | -0.932783814 | 0.172934304 | -5.393862252 | 6.90E-08    | 1.34E-06    |
| ENSMUSG00000026401 | 143.1517347 | -0.931804455 | 0.221349896 | -4.209644876 | 2.56E-05    | 0.000274626 |
| ENSMUSG00000070390 | 304.7816281 | -0.931622029 | 0.181121067 | -5.143642574 | 2.69E-07    | 4.61E-06    |
| ENSMUSG00000038515 | 2392.7963   | -0.930956873 | 0.116326518 | -8.002963452 | 1.21E-15    | 6.50E-14    |
| ENSMUSG00000078867 | 38.48232294 | -0.929907084 | 0.385266845 | -2.413670149 | 0.015792752 | 0.061973283 |
| ENSMUSG00000106383 | 105.9735816 | -0.927838164 | 0.265105502 | -3.499882711 | 0.000465463 | 0.003489173 |
| ENSMUSG00000067071 | 3426.169285 | -0.927600475 | 0.101614659 | -9.128608846 | 6.94E-20    | 5.55E-18    |
| ENSMUSG00000113940 | 69.98731156 | -0.927119591 | 0.318118857 | -2.914381124 | 0.003563945 | 0.018825092 |
| ENSMUSG00000033276 | 100.6443094 | -0.926662579 | 0.259876669 | -3.565778274 | 0.000362778 | 0.002816961 |
| ENSMUSG00000023886 | 20398.04096 | -0.926225862 | 0.122961703 | -7.532636898 | 4.97E-14    | 2.24E-12    |
| ENSMUSG00000086556 | 70.07723834 | -0.926172249 | 0.312124564 | -2.967316114 | 0.003004119 | 0.016460654 |
| ENSMUSG00000046070 | 49.2803471  | -0.925718967 | 0.343871169 | -2.692051705 | 0.007101393 | 0.03299337  |
| ENSMUSG00000069808 | 899.6178167 | -0.925647393 | 0.135316387 | -6.840615616 | 7.89E-12    | 2.75E-10    |
| ENSMUSG00000086549 | 1566.882235 | -0.925423028 | 0.161407932 | -5.73344207  | 9.84E-09    | 2.19E-07    |
| ENSMUSG00000058656 | 287.6827991 | -0.925145048 | 0.200999024 | -4.602734019 | 4.17E-06    | 5.49E-05    |
| ENSMUSG00000082535 | 39.55877692 | -0.924548279 | 0.38125435  | -2.425016997 | 0.01530767  | 0.060527722 |
| ENSMUSG00000059479 | 50.91226412 | -0.92271863  | 0.394522237 | -2.338825402 | 0.019344472 | 0.072539342 |
| ENSMUSG00000078349 | 374.4899385 | -0.922685341 | 0.183818809 | -5.019537159 | 5.18E-07    | 8.28E-06    |
| ENSMUSG00000033368 | 186.8673379 | -0.922311746 | 0.264190241 | -3.491089386 | 0.000481055 | 0.003585566 |
| ENSMUSG00000026090 | 5898.482339 | -0.922092771 | 0.10766142  | -8.564746545 | 1.08E-17    | 7.19E-16    |
| ENSMUSG00000042821 | 249.1773861 | -0.921505263 | 0.280083891 | -3.29010447  | 0.001001502 | 0.00665113  |
| ENSMUSG00000058145 | 306.0761981 | -0.919942606 | 0.170969104 | -5.380753494 | 7.42E-08    | 1.43E-06    |
| ENSMUSG00000008136 | 3378.33894  | -0.919603531 | 0.124005298 | -7.415840645 | 1.21E-13    | 5.12E-12    |
| ENSMUSG00000105802 | 47.64619805 | -0.91855068  | 0.394490477 | -2.328448297 | 0.019888312 | 0.074143463 |
| ENSMUSG00000020712 | 27.86511119 | -0.918065244 | 0.44753606  | -2.051377144 | 0.040230233 | 0.128635517 |
| ENSMUSG00000070667 | 35.64066483 | -0.918050154 | 0.422467792 | -2.173065431 | 0.029775393 | 0.101641059 |

|                    |             |              |             |              |             |             |
|--------------------|-------------|--------------|-------------|--------------|-------------|-------------|
| ENSMUSG00000097131 | 156.5873321 | -0.917413873 | 0.281637735 | -3.257425269 | 0.001124279 | 0.007325908 |
| ENSMUSG00000042804 | 70.89181712 | -0.917068345 | 0.339183424 | -2.703753427 | 0.006856114 | 0.032094502 |
| ENSMUSG00000025069 | 142.257103  | -0.916814792 | 0.339573809 | -2.699898424 | 0.006936065 | 0.032385215 |
| ENSMUSG00000000903 | 37.53469181 | -0.914973709 | 0.414036213 | -2.20988812  | 0.027112928 | 0.094890993 |
| ENSMUSG00000102246 | 29.34632133 | -0.914343105 | 0.452460561 | -2.020823879 | 0.043298    | 0.135807131 |
| ENSMUSG00000024965 | 76.638139   | -0.913235333 | 0.300344366 | -3.040627483 | 0.002360857 | 0.013496405 |
| ENSMUSG00000039774 | 2245.048875 | -0.912725661 | 0.106034353 | -8.607829753 | 7.45E-18    | 5.00E-16    |
| ENSMUSG00000022602 | 2267.980649 | -0.912513621 | 0.215247103 | -4.239377014 | 2.24E-05    | 0.00024419  |
| ENSMUSG00000085006 | 63.48220064 | -0.911920999 | 0.323041239 | -2.822924415 | 0.004758779 | 0.023843076 |
| ENSMUSG00000002489 | 5855.983383 | -0.911549495 | 0.126688726 | -7.195190332 | 6.24E-13    | 2.48E-11    |
| ENSMUSG00000074796 | 227.8988982 | -0.910985254 | 0.337292823 | -2.70087352  | 0.006915763 | 0.032319454 |
| ENSMUSG00000105748 | 190.7343698 | -0.910880956 | 0.204572457 | -4.452607981 | 8.48E-06    | 0.000102708 |
| ENSMUSG00000034799 | 204.2284751 | -0.910786116 | 0.292576821 | -3.112981111 | 0.001852079 | 0.011049547 |
| ENSMUSG00000104443 | 61.19530723 | -0.910658595 | 0.402874697 | -2.260401561 | 0.02379634  | 0.085649156 |
| ENSMUSG00000074215 | 409.1134135 | -0.909812024 | 0.199837477 | -4.552759767 | 5.29E-06    | 6.79E-05    |
| ENSMUSG00000113679 | 60.73195581 | -0.909109377 | 0.344086512 | -2.642095358 | 0.008239485 | 0.037226249 |
| ENSMUSG00000023009 | 94.56029549 | -0.909011108 | 0.315273741 | -2.883243958 | 0.003936025 | 0.020380146 |
| ENSMUSG00000104699 | 33.02393982 | -0.908925629 | 0.430570858 | -2.11097805  | 0.034774199 | 0.114888801 |
| ENSMUSG00000018909 | 5709.190975 | -0.908764829 | 0.139991524 | -6.491570373 | 8.49E-11    | 2.59E-09    |
| ENSMUSG00000028631 | 43.31558098 | -0.90859196  | 0.437914264 | -2.074817    | 0.038003498 | 0.123078132 |
| ENSMUSG00000073482 | 121.6945978 | -0.907789223 | 0.364688214 | -2.489220078 | 0.012802369 | 0.052516734 |
| ENSMUSG00000041644 | 91.28215317 | -0.90747166  | 0.335572138 | -2.704252101 | 0.006845833 | 0.032059832 |
| ENSMUSG00000107355 | 41.59132108 | -0.906571645 | 0.410836804 | -2.206646621 | 0.027338757 | 0.095367061 |
| ENSMUSG00000042745 | 5037.020013 | -0.905378402 | 0.148208048 | -6.108834283 | 1.00E-09    | 2.61E-08    |
| ENSMUSG00000031875 | 47.11847845 | -0.903808772 | 0.385587387 | -2.343979089 | 0.019079241 | 0.071848388 |
| ENSMUSG00000054967 | 100.2035514 | -0.903808573 | 0.277067934 | -3.262046823 | 0.001106109 | 0.007235943 |
| ENSMUSG00000073733 | 81.88439115 | -0.903338996 | 0.320195904 | -2.821207216 | 0.004784329 | 0.023944191 |
| ENSMUSG00000083909 | 34.52742472 | -0.902516603 | 0.459792793 | -1.96287679  | 0.049660492 | 0.150390907 |
| ENSMUSG00000009394 | 77.14241398 | -0.902454774 | 0.299037779 | -3.017862078 | 0.002545647 | 0.014397789 |

|                    |             |              |             |              |             |             |
|--------------------|-------------|--------------|-------------|--------------|-------------|-------------|
| ENSMUSG00000102140 | 245.9538429 | -0.900339757 | 0.230779186 | -3.901303983 | 9.57E-05    | 0.000883141 |
| ENSMUSG00000086645 | 234.8662083 | -0.900275717 | 0.186168337 | -4.835815436 | 1.33E-06    | 1.94E-05    |
| ENSMUSG00000097431 | 131.6765159 | -0.900112167 | 0.310874696 | -2.895417921 | 0.00378654  | 0.019734433 |
| ENSMUSG00000039763 | 398.8165678 | -0.899831095 | 0.16894276  | -5.326248352 | 1.00E-07    | 1.88E-06    |
| ENSMUSG00000032380 | 3097.801784 | -0.899511895 | 0.115201692 | -7.808148319 | 5.80E-15    | 2.88E-13    |
| ENSMUSG00000056752 | 52.04619803 | -0.899023185 | 0.392352394 | -2.291366636 | 0.021942218 | 0.080205441 |
| ENSMUSG00000039563 | 51.4112826  | -0.897416571 | 0.347032439 | -2.585973152 | 0.009710449 | 0.042394818 |
| ENSMUSG00000111811 | 89.20708161 | -0.897348728 | 0.314411901 | -2.854054583 | 0.004316511 | 0.021987785 |
| ENSMUSG00000030030 | 45.77542533 | -0.897159121 | 0.454798345 | -1.972652564 | 0.04853516  | 0.147967546 |
| ENSMUSG00000106896 | 93.0268515  | -0.89673341  | 0.272317864 | -3.292965792 | 0.000991365 | 0.006597565 |
| ENSMUSG00000085360 | 542.4898486 | -0.896265757 | 0.170414075 | -5.259341164 | 1.45E-07    | 2.63E-06    |
| ENSMUSG00000031374 | 41.0612333  | -0.896092639 | 0.373998608 | -2.395978538 | 0.016576061 | 0.064244479 |
| ENSMUSG00000002983 | 2432.415069 | -0.895710938 | 0.174443512 | -5.134676143 | 2.83E-07    | 4.82E-06    |
| ENSMUSG00000025081 | 229.2065006 | -0.895191377 | 0.357780081 | -2.502071594 | 0.012346895 | 0.05102819  |
| ENSMUSG00000028434 | 6819.96331  | -0.894102017 | 0.103668714 | -8.624607955 | 6.43E-18    | 4.36E-16    |
| ENSMUSG00000048728 | 107.4368719 | -0.893904879 | 0.253702021 | -3.523444052 | 0.000425977 | 0.003234496 |
| ENSMUSG00000040828 | 66.62797084 | -0.893593113 | 0.345117364 | -2.589244143 | 0.009618687 | 0.042093082 |
| ENSMUSG00000046733 | 121.506966  | -0.893193068 | 0.2824372   | -3.162448393 | 0.001564485 | 0.009622055 |
| ENSMUSG00000033967 | 333.7347302 | -0.890785305 | 0.214279524 | -4.157118174 | 3.22E-05    | 0.000337909 |
| ENSMUSG00000017950 | 43546.50643 | -0.88956434  | 0.133303195 | -6.673240931 | 2.50E-11    | 8.19E-10    |
| ENSMUSG00000106887 | 73.2906432  | -0.888733861 | 0.319743209 | -2.779523805 | 0.005443866 | 0.026588625 |
| ENSMUSG00000092470 | 53.96770157 | -0.887171024 | 0.359039279 | -2.470958128 | 0.01347516  | 0.054707725 |
| ENSMUSG00000034472 | 186.7884425 | -0.887075543 | 0.323507676 | -2.742054076 | 0.006105629 | 0.029125482 |
| ENSMUSG00000035566 | 324.9865937 | -0.886996699 | 0.216178259 | -4.10308003  | 4.08E-05    | 0.000416673 |
| ENSMUSG00000115092 | 70.86397708 | -0.886323227 | 0.305686748 | -2.899449301 | 0.003738188 | 0.019543044 |
| ENSMUSG00000026170 | 476.8411783 | -0.885776778 | 0.175347114 | -5.051561774 | 4.38E-07    | 7.15E-06    |
| ENSMUSG00000079484 | 57.88808917 | -0.88528894  | 0.319540674 | -2.770504704 | 0.005596949 | 0.027169692 |
| ENSMUSG00000049670 | 43.50524356 | -0.884835726 | 0.357572617 | -2.474562323 | 0.013339954 | 0.054247688 |
| ENSMUSG00000002265 | 228.928818  | -0.884768856 | 0.21785803  | -4.061217561 | 4.88E-05    | 0.000491947 |

|                    |             |              |             |              |             |             |
|--------------------|-------------|--------------|-------------|--------------|-------------|-------------|
| ENSMUSG00000097619 | 30.36987891 | -0.884555511 | 0.43831369  | -2.018087805 | 0.043582118 | 0.136461565 |
| ENSMUSG00000034881 | 62.04353724 | -0.884196206 | 0.401727908 | -2.200982773 | 0.027737243 | 0.096425295 |
| ENSMUSG00000106508 | 252.3589467 | -0.883459865 | 0.20587468  | -4.291250704 | 1.78E-05    | 0.000200517 |
| ENSMUSG00000039496 | 71.21151687 | -0.882404719 | 0.288693668 | -3.056543373 | 0.002239051 | 0.012925983 |
| ENSMUSG00000107761 | 112.9694796 | -0.882132276 | 0.282529694 | -3.122263941 | 0.00179466  | 0.010761684 |
| ENSMUSG00000022780 | 37.17180471 | -0.881463833 | 0.442448235 | -1.992241718 | 0.046344543 | 0.142989714 |
| ENSMUSG00000061601 | 187.3824647 | -0.880810588 | 0.262532736 | -3.355050506 | 0.000793505 | 0.005458345 |
| ENSMUSG00000021684 | 1167.629536 | -0.880217883 | 0.122385032 | -7.192202073 | 6.38E-13    | 2.53E-11    |
| ENSMUSG00000097872 | 103.6310366 | -0.879012003 | 0.33846179  | -2.597078986 | 0.00940203  | 0.041325549 |
| ENSMUSG00000057880 | 1571.037037 | -0.87870955  | 0.440898612 | -1.992996863 | 0.046261791 | 0.142813426 |
| ENSMUSG00000005883 | 56.31328536 | -0.876082636 | 0.367531025 | -2.383697093 | 0.017139704 | 0.066015981 |
| ENSMUSG00000110575 | 66.84286896 | -0.875832395 | 0.344588508 | -2.541676156 | 0.011032234 | 0.046853903 |
| ENSMUSG00000067220 | 80.04764326 | -0.875357572 | 0.294972815 | -2.967587276 | 0.003001471 | 0.016450183 |
| ENSMUSG00000110611 | 314.4728816 | -0.874865036 | 0.205649693 | -4.254151917 | 2.10E-05    | 0.000230982 |
| ENSMUSG00000000731 | 80.51642334 | -0.873309321 | 0.333704088 | -2.617017146 | 0.008870189 | 0.039483847 |
| ENSMUSG00000024391 | 44.66916436 | -0.87237422  | 0.358824922 | -2.431197408 | 0.015049013 | 0.059674259 |
| ENSMUSG00000043668 | 1602.844829 | -0.870842179 | 0.117625821 | -7.40349499  | 1.33E-13    | 5.60E-12    |
| ENSMUSG00000096094 | 39.913084   | -0.870648857 | 0.388374296 | -2.241777755 | 0.02497574  | 0.088960864 |
| ENSMUSG00000029426 | 2513.960261 | -0.870577943 | 0.124420039 | -6.997087851 | 2.61E-12    | 9.68E-11    |
| ENSMUSG00000086533 | 105.932546  | -0.870244275 | 0.275109756 | -3.163262141 | 0.001560118 | 0.009597845 |
| ENSMUSG00000074052 | 57.26344837 | -0.869789776 | 0.343966606 | -2.528704127 | 0.011448449 | 0.048227904 |
| ENSMUSG00000079173 | 7013.478108 | -0.869615611 | 0.1416062   | -6.141084279 | 8.20E-10    | 2.17E-08    |
| ENSMUSG00000084149 | 43.77248986 | -0.866667662 | 0.398646734 | -2.174024238 | 0.029703315 | 0.101503774 |
| ENSMUSG00000097640 | 173.024056  | -0.86585464  | 0.213761297 | -4.050567872 | 5.11E-05    | 0.000511416 |
| ENSMUSG00000036928 | 62.09578663 | -0.864792942 | 0.355615749 | -2.431818457 | 0.015023235 | 0.059582637 |
| ENSMUSG00000031785 | 2637.786314 | -0.864592891 | 0.123694513 | -6.989743287 | 2.75E-12    | 1.02E-10    |
| ENSMUSG00000097075 | 69.89286163 | -0.863995807 | 0.314385312 | -2.748206658 | 0.005992223 | 0.028694988 |
| ENSMUSG00000067889 | 319.2888523 | -0.863897398 | 0.223062087 | -3.872901081 | 0.000107547 | 0.000977391 |
| ENSMUSG00000026979 | 1764.784622 | -0.862350577 | 0.10378961  | -8.308640669 | 9.68E-17    | 5.64E-15    |



|                    |             |              |             |              |             |             |
|--------------------|-------------|--------------|-------------|--------------|-------------|-------------|
| ENSMUSG00000000204 | 144.4521023 | -0.862201977 | 0.271058702 | -3.180868092 | 0.001468345 | 0.009118785 |
| ENSMUSG00000049307 | 1260.808414 | -0.860809467 | 0.167429038 | -5.141339141 | 2.73E-07    | 4.66E-06    |
| ENSMUSG00000038807 | 3934.590851 | -0.860583683 | 0.152611585 | -5.639045573 | 1.71E-08    | 3.66E-07    |
| ENSMUSG00000027168 | 66.2358047  | -0.860121087 | 0.302211543 | -2.84608946  | 0.004425976 | 0.022427365 |
| ENSMUSG00000065582 | 90.83163829 | -0.857575852 | 0.305297866 | -2.808980828 | 0.004969861 | 0.024728439 |
| ENSMUSG00000097487 | 73.86565676 | -0.857404007 | 0.314072485 | -2.729955817 | 0.006334281 | 0.030055491 |
| ENSMUSG00000075420 | 691.7355876 | -0.85708665  | 0.141528673 | -6.055922329 | 1.40E-09    | 3.57E-08    |
| ENSMUSG00000029851 | 1473.196259 | -0.856954853 | 0.169006846 | -5.070533381 | 3.97E-07    | 6.51E-06    |
| ENSMUSG00000033644 | 85.52125848 | -0.856546405 | 0.291377892 | -2.939641023 | 0.003285927 | 0.017657379 |
| ENSMUSG00000024696 | 67.76421505 | -0.855511451 | 0.295093311 | -2.899121798 | 0.003742095 | 0.01955306  |
| ENSMUSG00000047632 | 201.7738729 | -0.855444928 | 0.202338597 | -4.227789154 | 2.36E-05    | 0.000255983 |
| ENSMUSG00000023800 | 799.6525071 | -0.855070916 | 0.179566506 | -4.761861971 | 1.92E-06    | 2.72E-05    |
| ENSMUSG00000039158 | 775.6447327 | -0.854867522 | 0.212362001 | -4.025520185 | 5.68E-05    | 0.000560593 |
| ENSMUSG00000004952 | 1946.601366 | -0.854600622 | 0.123540875 | -6.917553598 | 4.60E-12    | 1.65E-10    |
| ENSMUSG00000061536 | 489.2798682 | -0.852108052 | 0.154157654 | -5.527510492 | 3.25E-08    | 6.59E-07    |
| ENSMUSG00000040212 | 371.3027176 | -0.850915258 | 0.275757236 | -3.085740454 | 0.00203046  | 0.01192499  |
| ENSMUSG00000074738 | 245.0835309 | -0.850417648 | 0.223427266 | -3.806239328 | 0.000141096 | 0.001236377 |
| ENSMUSG00000042474 | 101.3205839 | -0.849663234 | 0.288957616 | -2.940442429 | 0.003277439 | 0.01762908  |
| ENSMUSG00000097120 | 76.24701431 | -0.84907611  | 0.354368096 | -2.396028652 | 0.016573795 | 0.064244479 |
| ENSMUSG00000059213 | 62.10887869 | -0.849027315 | 0.406133568 | -2.090512535 | 0.036571784 | 0.119499977 |
| ENSMUSG00000053111 | 43.74635683 | -0.849010926 | 0.368925967 | -2.301304329 | 0.021374435 | 0.078632676 |
| ENSMUSG00000025738 | 68.31595671 | -0.848801372 | 0.406039688 | -2.090439426 | 0.036578344 | 0.119503905 |
| ENSMUSG00000093798 | 190.1877699 | -0.848420104 | 0.271437995 | -3.125649757 | 0.001774127 | 0.010650163 |
| ENSMUSG00000093042 | 42.78435729 | -0.847654379 | 0.368487515 | -2.300361195 | 0.021427765 | 0.078763902 |
| ENSMUSG00000112124 | 46.51855625 | -0.847010319 | 0.389374832 | -2.175308342 | 0.029607018 | 0.101267807 |
| ENSMUSG00000054612 | 205.1164083 | -0.846459339 | 0.192449935 | -4.398335287 | 1.09E-05    | 0.000128714 |
| ENSMUSG00000048965 | 64.68622276 | -0.846274346 | 0.345786401 | -2.447390478 | 0.014389485 | 0.05771581  |
| ENSMUSG00000054909 | 110.8973522 | -0.845409437 | 0.254176609 | -3.326070962 | 0.000880795 | 0.005994212 |
| ENSMUSG00000020032 | 167.0539993 | -0.844736632 | 0.219609897 | -3.846532625 | 0.000119801 | 0.001069958 |

|                    |             |              |             |              |             |             |
|--------------------|-------------|--------------|-------------|--------------|-------------|-------------|
| ENSMUSG00000047518 | 53.26102248 | -0.844687084 | 0.378722471 | -2.230359034 | 0.025723617 | 0.090970882 |
| ENSMUSG00000087600 | 60.09829432 | -0.844676237 | 0.358701511 | -2.354816501 | 0.018531854 | 0.070166195 |
| ENSMUSG00000014773 | 5079.954626 | -0.844209763 | 0.133243991 | -6.335818663 | 2.36E-10    | 6.78E-09    |
| ENSMUSG00000048174 | 120.4591047 | -0.843904583 | 0.27292398  | -3.092086607 | 0.001987549 | 0.011722909 |
| ENSMUSG00000003166 | 3350.981902 | -0.843702734 | 0.151028091 | -5.586396081 | 2.32E-08    | 4.85E-07    |
| ENSMUSG00000036565 | 7177.019667 | -0.843060884 | 0.127730992 | -6.600284489 | 4.10E-11    | 1.31E-09    |
| ENSMUSG00000054889 | 70860.08635 | -0.842742766 | 0.147557984 | -5.711265118 | 1.12E-08    | 2.47E-07    |
| ENSMUSG00000102632 | 110.1392739 | -0.840988302 | 0.251921491 | -3.338295188 | 0.000842941 | 0.005768161 |
| ENSMUSG00000027510 | 5105.855519 | -0.840341676 | 0.146838756 | -5.722887451 | 1.05E-08    | 2.32E-07    |
| ENSMUSG00000019464 | 113.8515013 | -0.839947317 | 0.24470658  | -3.432467237 | 0.000598116 | 0.004318093 |
| ENSMUSG00000108688 | 253.9511777 | -0.839831965 | 0.248154229 | -3.38431454  | 0.000713562 | 0.004996279 |
| ENSMUSG00000103778 | 32.07818957 | -0.839648529 | 0.425449289 | -1.973557251 | 0.048432109 | 0.147734161 |
| ENSMUSG00000022220 | 93.15706122 | -0.83930215  | 0.303188485 | -2.768252063 | 0.005635785 | 0.027340361 |
| ENSMUSG00000083496 | 82.32913709 | -0.83875609  | 0.352411728 | -2.380045904 | 0.017310482 | 0.066528837 |
| ENSMUSG00000103059 | 34.39729675 | -0.838643505 | 0.423267283 | -1.981356787 | 0.047551276 | 0.145786946 |
| ENSMUSG00000047591 | 420.6839561 | -0.838389985 | 0.21039982  | -3.984746686 | 6.76E-05    | 0.000654856 |
| ENSMUSG00000046694 | 337.0902819 | -0.838318648 | 0.227656298 | -3.682387244 | 0.00023106  | 0.001897927 |
| ENSMUSG00000021062 | 3016.306777 | -0.836364023 | 0.124543065 | -6.715460443 | 1.87E-11    | 6.25E-10    |
| ENSMUSG00000052673 | 95.81078927 | -0.836069926 | 0.250142178 | -3.342378849 | 0.000830636 | 0.00569269  |
| ENSMUSG00000044037 | 2896.667377 | -0.835971123 | 0.126847288 | -6.590374405 | 4.39E-11    | 1.39E-09    |
| ENSMUSG00000024411 | 5597.440259 | -0.835935066 | 0.188251093 | -4.440532335 | 8.97E-06    | 0.00010794  |
| ENSMUSG00000028699 | 1419.101154 | -0.835846938 | 0.203635138 | -4.104630214 | 4.05E-05    | 0.000414269 |
| ENSMUSG00000025577 | 1757.124511 | -0.835796612 | 0.122724227 | -6.810363614 | 9.74E-12    | 3.35E-10    |
| ENSMUSG00000027938 | 538.940912  | -0.834760733 | 0.193509298 | -4.313801664 | 1.60E-05    | 0.000183239 |
| ENSMUSG00000029828 | 228.1644469 | -0.833909896 | 0.239488473 | -3.482046068 | 0.000497598 | 0.003696514 |
| ENSMUSG00000037621 | 455.6691171 | -0.833335994 | 0.197314843 | -4.223382202 | 2.41E-05    | 0.000260157 |
| ENSMUSG00000034173 | 70.94162461 | -0.832805748 | 0.314006184 | -2.652195371 | 0.007997025 | 0.036336932 |
| ENSMUSG00000000531 | 1090.292488 | -0.832596463 | 0.196272779 | -4.242037378 | 2.21E-05    | 0.000241785 |
| ENSMUSG00000044005 | 364.5535487 | -0.832012656 | 0.159432461 | -5.218590065 | 1.80E-07    | 3.21E-06    |

|                    |             |              |             |              |             |             |
|--------------------|-------------|--------------|-------------|--------------|-------------|-------------|
| ENSMUSG00000038963 | 1084.527296 | -0.831995772 | 0.148831314 | -5.590193028 | 2.27E-08    | 4.76E-07    |
| ENSMUSG00000097164 | 311.5569979 | -0.831778544 | 0.177668927 | -4.681620807 | 2.85E-06    | 3.87E-05    |
| ENSMUSG00000044156 | 1081.765314 | -0.831703325 | 0.169371625 | -4.910523391 | 9.08E-07    | 1.38E-05    |
| ENSMUSG00000060176 | 147.0306616 | -0.831380888 | 0.24202094  | -3.435160971 | 0.000592202 | 0.004279551 |
| ENSMUSG00000070385 | 72.28064562 | -0.830505022 | 0.338430387 | -2.453990701 | 0.014128064 | 0.056882099 |
| ENSMUSG00000004473 | 218.9868399 | -0.828156476 | 0.258500143 | -3.203698333 | 0.001356746 | 0.008532652 |
| ENSMUSG00000078864 | 65.21875186 | -0.827699506 | 0.311288181 | -2.658949353 | 0.007838475 | 0.035756644 |
| ENSMUSG00000052698 | 2626.676092 | -0.82606168  | 0.148386507 | -5.566959542 | 2.59E-08    | 5.34E-07    |
| ENSMUSG00000035262 | 94.70625733 | -0.825849484 | 0.262804151 | -3.142452203 | 0.001675391 | 0.01017785  |
| ENSMUSG00000044231 | 402.4582332 | -0.825697666 | 0.159625729 | -5.172710385 | 2.31E-07    | 4.00E-06    |
| ENSMUSG00000094786 | 119.8868987 | -0.824633472 | 0.241595244 | -3.413285208 | 0.000641847 | 0.004576801 |
| ENSMUSG00000041144 | 306.7175816 | -0.824532056 | 0.182026382 | -4.529739297 | 5.91E-06    | 7.47E-05    |
| ENSMUSG00000037568 | 67.32005243 | -0.822649923 | 0.387807605 | -2.121283627 | 0.033897941 | 0.1126614   |
| ENSMUSG00000037003 | 582.7758028 | -0.822519214 | 0.168186849 | -4.890508505 | 1.01E-06    | 1.51E-05    |
| ENSMUSG00000089975 | 53.43291355 | -0.821979063 | 0.404878859 | -2.030185188 | 0.042337719 | 0.133489816 |
| ENSMUSG00000048707 | 3527.672237 | -0.819309282 | 0.100033275 | -8.190367493 | 2.60E-16    | 1.44E-14    |
| ENSMUSG00000043747 | 49.85503124 | -0.818939808 | 0.338188466 | -2.421548602 | 0.015454534 | 0.060975818 |
| ENSMUSG00000035576 | 309.0600663 | -0.818793129 | 0.208638149 | -3.924465078 | 8.69E-05    | 0.000812432 |
| ENSMUSG00000023216 | 214.5943339 | -0.81826077  | 0.284986508 | -2.871226345 | 0.004088826 | 0.021058872 |
| ENSMUSG00000031144 | 42.60787092 | -0.817985401 | 0.391748702 | -2.08803602  | 0.036794586 | 0.119985426 |
| ENSMUSG00000073856 | 97.53942076 | -0.81564979  | 0.296268382 | -2.753077409 | 0.005903794 | 0.028344564 |
| ENSMUSG00000039621 | 220.4427048 | -0.815449592 | 0.190874464 | -4.2721775   | 1.94E-05    | 0.000215198 |
| ENSMUSG00000042249 | 2694.228511 | -0.814244445 | 0.124572144 | -6.536328442 | 6.30E-11    | 1.96E-09    |
| ENSMUSG00000031596 | 899.1593174 | -0.813749551 | 0.216367949 | -3.760952376 | 0.000169268 | 0.001446852 |
| ENSMUSG00000105944 | 46.54805088 | -0.813423125 | 0.388738036 | -2.092471151 | 0.03639639  | 0.119188824 |
| ENSMUSG00000038271 | 185.3928263 | -0.812187206 | 0.258073149 | -3.14712014  | 0.001648872 | 0.010046856 |
| ENSMUSG00000030739 | 19723.3923  | -0.811374846 | 0.147714146 | -5.49287166  | 3.95E-08    | 7.94E-07    |
| ENSMUSG00000047604 | 4208.691867 | -0.810013326 | 0.131413388 | -6.163856958 | 7.10E-10    | 1.90E-08    |
| ENSMUSG00000021373 | 1075.42697  | -0.809839015 | 0.178069935 | -4.547870568 | 5.42E-06    | 6.90E-05    |

|                    |             |              |             |              |             |             |
|--------------------|-------------|--------------|-------------|--------------|-------------|-------------|
| ENSMUSG00000024730 | 685.7735163 | -0.80851927  | 0.140189876 | -5.767315677 | 8.05E-09    | 1.83E-07    |
| ENSMUSG00000092187 | 53.4269302  | -0.808288908 | 0.34489572  | -2.343574773 | 0.019099933 | 0.071889893 |
| ENSMUSG00000104950 | 90.85426183 | -0.807972663 | 0.326449597 | -2.475030359 | 0.013322485 | 0.054226089 |
| ENSMUSG00000029862 | 96.41737844 | -0.807287762 | 0.274634627 | -2.939497363 | 0.003287451 | 0.017657379 |
| ENSMUSG00000035279 | 105.3115535 | -0.806685982 | 0.34140068  | -2.362871632 | 0.018133395 | 0.069034689 |
| ENSMUSG00000032417 | 44.8346577  | -0.806115062 | 0.374145634 | -2.154548898 | 0.031197152 | 0.105589267 |
| ENSMUSG00000041633 | 50.25019156 | -0.805884507 | 0.350265026 | -2.300784968 | 0.021403789 | 0.078727674 |
| ENSMUSG00000107143 | 51.79688521 | -0.805262001 | 0.337107704 | -2.388738056 | 0.016906351 | 0.065286328 |
| ENSMUSG00000057751 | 87.06519564 | -0.804769143 | 0.376199741 | -2.139207062 | 0.032418903 | 0.108980094 |
| ENSMUSG00000035493 | 901.6511007 | -0.804525529 | 0.177535364 | -4.531635322 | 5.85E-06    | 7.41E-05    |
| ENSMUSG00000019768 | 54.712576   | -0.804391558 | 0.371065968 | -2.16778586  | 0.030174983 | 0.102727824 |
| ENSMUSG00000032135 | 112.5713365 | -0.804370854 | 0.306345226 | -2.625700629 | 0.008647083 | 0.038667579 |
| ENSMUSG00000026519 | 3205.927665 | -0.804202633 | 0.116074839 | -6.928311428 | 4.26E-12    | 1.54E-10    |
| ENSMUSG00000049971 | 171.4820848 | -0.804087376 | 0.252813599 | -3.180554282 | 0.001469936 | 0.009126125 |
| ENSMUSG00000022474 | 436.2022526 | -0.804077276 | 0.164710575 | -4.881758647 | 1.05E-06    | 1.57E-05    |
| ENSMUSG00000043448 | 61.76206951 | -0.803611858 | 0.308980149 | -2.600852714 | 0.009299237 | 0.040960356 |
| ENSMUSG00000038976 | 2650.246214 | -0.803589916 | 0.113400762 | -7.086283215 | 1.38E-12    | 5.25E-11    |
| ENSMUSG00000026205 | 379.6428168 | -0.803524841 | 0.203409458 | -3.950282597 | 7.81E-05    | 0.000740344 |
| ENSMUSG00000053411 | 1942.536577 | -0.802543351 | 0.144438874 | -5.556283615 | 2.76E-08    | 5.65E-07    |
| ENSMUSG00000000126 | 73.24555475 | -0.801820923 | 0.404200165 | -1.983722401 | 0.047286795 | 0.145213827 |
| ENSMUSG00000024654 | 575.4807051 | -0.801642884 | 0.155101833 | -5.168493953 | 2.36E-07    | 4.08E-06    |
| ENSMUSG00000030110 | 110.6730506 | -0.801624159 | 0.277394806 | -2.889831181 | 0.003854488 | 0.020023044 |
| ENSMUSG00000105601 | 43.65042018 | -0.800211655 | 0.373446072 | -2.142777001 | 0.032131009 | 0.108159038 |
| ENSMUSG00000022054 | 174.9797379 | -0.799853122 | 0.284837713 | -2.808101192 | 0.004983456 | 0.024773977 |
| ENSMUSG00000103897 | 57.49516014 | -0.79876944  | 0.344053573 | -2.321642624 | 0.020252187 | 0.075206762 |
| ENSMUSG00000001552 | 15168.36874 | -0.79856599  | 0.098053409 | -8.144194027 | 3.82E-16    | 2.10E-14    |
| ENSMUSG00000010051 | 288.3169171 | -0.798523511 | 0.206368145 | -3.869412662 | 0.000109098 | 0.000988619 |
| ENSMUSG00000044424 | 145.4555331 | -0.798436861 | 0.247150041 | -3.230575477 | 0.001235413 | 0.007890436 |
| ENSMUSG00000062127 | 2610.234046 | -0.798298263 | 0.12034675  | -6.633317983 | 3.28E-11    | 1.06E-09    |

|                    |             |              |             |              |             |             |
|--------------------|-------------|--------------|-------------|--------------|-------------|-------------|
| ENSMUSG00000057967 | 139.0449265 | -0.797989592 | 0.25119961  | -3.176715094 | 0.001489533 | 0.009219559 |
| ENSMUSG00000027332 | 3415.071349 | -0.797124626 | 0.139337653 | -5.720812783 | 1.06E-08    | 2.34E-07    |
| ENSMUSG00000102650 | 65.15120656 | -0.796933925 | 0.319817812 | -2.491837215 | 0.012708427 | 0.052193485 |
| ENSMUSG00000111128 | 359.1161021 | -0.796633017 | 0.243751503 | -3.268217873 | 0.00108227  | 0.007109192 |
| ENSMUSG00000085498 | 64.33144188 | -0.796447323 | 0.304444146 | -2.616070413 | 0.008894821 | 0.039561908 |
| ENSMUSG00000045667 | 81.86361524 | -0.796355846 | 0.297060068 | -2.680790625 | 0.007344846 | 0.033944148 |
| ENSMUSG00000039676 | 70.5578181  | -0.796322217 | 0.335037262 | -2.37681687  | 0.017462755 | 0.067017193 |
| ENSMUSG00000004371 | 74.3281707  | -0.795664986 | 0.318628538 | -2.49715544  | 0.012519407 | 0.05155009  |
| ENSMUSG00000032131 | 65.79370084 | -0.794601178 | 0.327749945 | -2.424412849 | 0.015333163 | 0.060596291 |
| ENSMUSG00000043024 | 66.83907106 | -0.793910936 | 0.328159422 | -2.419284293 | 0.015551081 | 0.061251264 |
| ENSMUSG00000051314 | 59.63678346 | -0.792557112 | 0.384222904 | -2.062753426 | 0.039136061 | 0.125960813 |
| ENSMUSG00000065952 | 122.3148528 | -0.792505574 | 0.28779679  | -2.75369845  | 0.005892603 | 0.028296931 |
| ENSMUSG00000095789 | 62.96411682 | -0.792209727 | 0.390996284 | -2.026131092 | 0.042751353 | 0.134542615 |
| ENSMUSG00000021223 | 997.0614944 | -0.791381147 | 0.148957909 | -5.312783659 | 1.08E-07    | 2.01E-06    |
| ENSMUSG00000044134 | 3483.622878 | -0.791258838 | 0.136509747 | -5.796354164 | 6.78E-09    | 1.56E-07    |
| ENSMUSG00000033065 | 924.2248035 | -0.791187137 | 0.136079585 | -5.814150137 | 6.09E-09    | 1.41E-07    |
| ENSMUSG00000109233 | 41.93128807 | -0.790822822 | 0.368421071 | -2.146518979 | 0.031831596 | 0.107345596 |
| ENSMUSG00000042672 | 107.3502878 | -0.789879968 | 0.382887492 | -2.062955786 | 0.039116829 | 0.125960813 |
| ENSMUSG00000033717 | 5908.475561 | -0.78780225  | 0.141468873 | -5.568732079 | 2.57E-08    | 5.30E-07    |
| ENSMUSG00000021594 | 600.6716732 | -0.787269975 | 0.211805419 | -3.716949168 | 0.000201643 | 0.001689906 |
| ENSMUSG00000032344 | 894.9338021 | -0.787002591 | 0.184364726 | -4.268726495 | 1.97E-05    | 0.000218119 |
| ENSMUSG00000047238 | 93.0857096  | -0.786538134 | 0.260291501 | -3.021758804 | 0.002513107 | 0.014224569 |
| ENSMUSG00000024376 | 42.62206939 | -0.785557807 | 0.376184646 | -2.088224002 | 0.036777633 | 0.119969212 |
| ENSMUSG00000029178 | 8042.342174 | -0.785379693 | 0.090636541 | -8.665155221 | 4.51E-18    | 3.12E-16    |
| ENSMUSG00000044352 | 370.2610634 | -0.784432608 | 0.173803307 | -4.513335351 | 6.38E-06    | 8.01E-05    |
| ENSMUSG00000026489 | 7209.324649 | -0.784423516 | 0.164058954 | -4.781351449 | 1.74E-06    | 2.50E-05    |
| ENSMUSG00000097827 | 54.41294996 | -0.782704638 | 0.342689145 | -2.284007675 | 0.02237108  | 0.081532514 |
| ENSMUSG00000036158 | 128.1548369 | -0.780787588 | 0.236099758 | -3.307024093 | 0.000942928 | 0.006328735 |
| ENSMUSG00000029922 | 2763.516406 | -0.780467593 | 0.112030715 | -6.966550166 | 3.25E-12    | 1.19E-10    |

|                    |             |              |             |              |             |             |
|--------------------|-------------|--------------|-------------|--------------|-------------|-------------|
| ENSMUSG00000026923 | 19273.41862 | -0.780012378 | 0.110875663 | -7.035018828 | 1.99E-12    | 7.45E-11    |
| ENSMUSG00000044469 | 1228.05613  | -0.779210123 | 0.121037622 | -6.437751402 | 1.21E-10    | 3.63E-09    |
| ENSMUSG00000067121 | 46.5172843  | -0.778671417 | 0.355247724 | -2.191911066 | 0.028385929 | 0.098205802 |
| ENSMUSG00000038342 | 12739.30767 | -0.778602636 | 0.100704807 | -7.731533968 | 1.06E-14    | 5.19E-13    |
| ENSMUSG00000104642 | 44.72162376 | -0.777467299 | 0.364183275 | -2.134824284 | 0.032775366 | 0.110012558 |
| ENSMUSG00000040046 | 332.9020162 | -0.777442029 | 0.276344199 | -2.813310476 | 0.004903428 | 0.02446339  |
| ENSMUSG00000053226 | 266.7431815 | -0.776969279 | 0.26881997  | -2.890295987 | 0.003848793 | 0.020002779 |
| ENSMUSG00000043391 | 246.3475575 | -0.776491965 | 0.229405381 | -3.384802753 | 0.000712294 | 0.004992103 |
| ENSMUSG00000073399 | 365.5549344 | -0.776449241 | 0.187086177 | -4.150222392 | 3.32E-05    | 0.000346948 |
| ENSMUSG00000014351 | 515.9761699 | -0.776330954 | 0.196572315 | -3.949340241 | 7.84E-05    | 0.000742421 |
| ENSMUSG00000108806 | 45.2383721  | -0.776246111 | 0.358054021 | -2.167958089 | 0.030161875 | 0.102708808 |
| ENSMUSG00000046410 | 331.3194236 | -0.775018532 | 0.192825302 | -4.019278193 | 5.84E-05    | 0.000573759 |
| ENSMUSG00000085828 | 151.2074813 | -0.774247872 | 0.306269482 | -2.527995504 | 0.011471582 | 0.048287609 |
| ENSMUSG00000107728 | 260.4256136 | -0.772141261 | 0.222950733 | -3.463282008 | 0.000533629 | 0.003915912 |
| ENSMUSG00000020682 | 148.5914701 | -0.772027484 | 0.297418376 | -2.595762554 | 0.009438126 | 0.041449322 |
| ENSMUSG00000039620 | 553.9314739 | -0.771634228 | 0.148182451 | -5.207325316 | 1.92E-07    | 3.39E-06    |
| ENSMUSG00000043488 | 101.365325  | -0.771435029 | 0.280406857 | -2.751127551 | 0.005939051 | 0.028489306 |
| ENSMUSG00000113473 | 46.73915293 | -0.769964291 | 0.379501529 | -2.028883241 | 0.042470184 | 0.133812882 |
| ENSMUSG00000052415 | 68.38647356 | -0.769521445 | 0.310164061 | -2.481014219 | 0.013100915 | 0.0535196   |
| ENSMUSG00000048070 | 186.5279594 | -0.76819644  | 0.263491733 | -2.91544798  | 0.003551783 | 0.018783096 |
| ENSMUSG00000036646 | 5605.320691 | -0.767918325 | 0.105014649 | -7.312487651 | 2.62E-13    | 1.07E-11    |
| ENSMUSG00000024215 | 763.0374307 | -0.767767076 | 0.241849038 | -3.174571551 | 0.001500579 | 0.009275058 |
| ENSMUSG00000098488 | 111.1060965 | -0.767487185 | 0.27677255  | -2.77298881  | 0.005554403 | 0.027018352 |
| ENSMUSG00000055862 | 559.837008  | -0.767302052 | 0.184195031 | -4.165704393 | 3.10E-05    | 0.000326821 |
| ENSMUSG00000111639 | 88.91620954 | -0.766780057 | 0.277649188 | -2.761686657 | 0.005750364 | 0.027793424 |
| ENSMUSG00000026198 | 122.4656383 | -0.766132778 | 0.268826208 | -2.849918477 | 0.004373044 | 0.022230054 |
| ENSMUSG00000039395 | 2430.871435 | -0.76432247  | 0.159675972 | -4.786709354 | 1.70E-06    | 2.44E-05    |
| ENSMUSG00000005763 | 69.19492267 | -0.762689307 | 0.295576441 | -2.580345393 | 0.009870154 | 0.042932379 |
| ENSMUSG00000070337 | 58.14372409 | -0.761731383 | 0.35933367  | -2.119844167 | 0.034019189 | 0.112955993 |

|                     |             |              |             |              |             |             |
|---------------------|-------------|--------------|-------------|--------------|-------------|-------------|
| ENSMUSG00000043415  | 218.5033343 | -0.761453158 | 0.216576532 | -3.515861806 | 0.000438329 | 0.003318118 |
| ENSMUSG00000025481  | 481.0313273 | -0.760900555 | 0.171961676 | -4.424826353 | 9.65E-06    | 0.000115353 |
| ENSMUSG00000038268  | 390.6701303 | -0.760170401 | 0.229554972 | -3.311496133 | 0.000927985 | 0.006257937 |
| ENSMUSG00000034282  | 1792.032527 | -0.759409017 | 0.118985611 | -6.382360123 | 1.74E-10    | 5.10E-09    |
| ENSMUSG00000032657  | 433.3571146 | -0.759278536 | 0.15106801  | -5.026070928 | 5.01E-07    | 8.04E-06    |
| ENSMUSG00000031748  | 262.0498522 | -0.758071659 | 0.223328578 | -3.394422993 | 0.000687734 | 0.004849851 |
| ENSMUSG00000108494  | 44.50514537 | -0.757751528 | 0.369678417 | -2.049758638 | 0.04038799  | 0.128983611 |
| ENSMUSG00000110208  | 190.323621  | -0.757595709 | 0.37914128  | -1.998188405 | 0.045696238 | 0.141577078 |
| ENSMUSG00000083367  | 51.45185952 | -0.757512681 | 0.371940081 | -2.036652461 | 0.041684882 | 0.13212259  |
| ENSMUSG00000003051  | 32911.26743 | -0.757043951 | 0.112588855 | -6.723968813 | 1.77E-11    | 5.91E-10    |
| ENSMUSG00000030849  | 3785.853922 | -0.756583026 | 0.129757569 | -5.830742895 | 5.52E-09    | 1.29E-07    |
| ENSMUSG00000024922  | 4024.909363 | -0.756527472 | 0.134527816 | -5.623576548 | 1.87E-08    | 3.97E-07    |
| ENSMUSG00000027071  | 88.73966137 | -0.756050128 | 0.361987678 | -2.088607356 | 0.036743082 | 0.11991914  |
| ENSMUSG00000005677  | 337.715411  | -0.756007874 | 0.28049534  | -2.695260009 | 0.007033372 | 0.032752399 |
| ENSMUSG000000057329 | 1084.144784 | -0.755384926 | 0.141635658 | -5.333296267 | 9.64E-08    | 1.82E-06    |
| ENSMUSG00000069581  | 102.5452766 | -0.755153468 | 0.319907175 | -2.360539332 | 0.018248383 | 0.069328312 |
| ENSMUSG00000028862  | 345.1422256 | -0.754362955 | 0.231624376 | -3.256837505 | 0.001126609 | 0.007335875 |
| ENSMUSG00000025085  | 740.4717994 | -0.753082225 | 0.178431408 | -4.220570009 | 2.44E-05    | 0.000262787 |
| ENSMUSG00000026883  | 12457.47764 | -0.752423217 | 0.113259409 | -6.643361667 | 3.07E-11    | 9.92E-10    |
| ENSMUSG00000024036  | 3316.650237 | -0.752311053 | 0.124820023 | -6.027166443 | 1.67E-09    | 4.21E-08    |
| ENSMUSG00000020865  | 4206.631152 | -0.751863779 | 0.168417944 | -4.4642736   | 8.03E-06    | 9.79E-05    |
| ENSMUSG00000031303  | 888.3577573 | -0.751612305 | 0.14402464  | -5.218636919 | 1.80E-07    | 3.21E-06    |
| ENSMUSG00000031951  | 82.91567959 | -0.751167529 | 0.28976977  | -2.592290871 | 0.009533913 | 0.041795908 |
| ENSMUSG00000045822  | 1239.721189 | -0.750750508 | 0.154327294 | -4.864664506 | 1.15E-06    | 1.70E-05    |
| ENSMUSG00000001911  | 5654.921274 | -0.749308849 | 0.120596388 | -6.213360619 | 5.19E-10    | 1.41E-08    |
| ENSMUSG00000015627  | 3823.030342 | -0.74930857  | 0.158037748 | -4.741326548 | 2.12E-06    | 2.97E-05    |
| ENSMUSG00000035900  | 3518.537471 | -0.748819616 | 0.109288244 | -6.851785606 | 7.29E-12    | 2.56E-10    |
| ENSMUSG00000060519  | 468.5155249 | -0.748617177 | 0.146357532 | -5.11498908  | 3.14E-07    | 5.28E-06    |
| ENSMUSG00000005686  | 1294.355976 | -0.74648532  | 0.130305562 | -5.728729535 | 1.01E-08    | 2.25E-07    |

|                     |             |              |             |              |             |             |
|---------------------|-------------|--------------|-------------|--------------|-------------|-------------|
| ENSMUSG00000036667  | 1217.096031 | -0.745942624 | 0.166156651 | -4.489393718 | 7.14E-06    | 8.83E-05    |
| ENSMUSG00000022844  | 1467.113202 | -0.74575066  | 0.135161813 | -5.517465638 | 3.44E-08    | 6.95E-07    |
| ENSMUSG00000020895  | 345.2750323 | -0.745688339 | 0.154160147 | -4.837101883 | 1.32E-06    | 1.93E-05    |
| ENSMUSG00000019066  | 2363.47925  | -0.745343844 | 0.144465911 | -5.159306034 | 2.48E-07    | 4.27E-06    |
| ENSMUSG000000100632 | 98.86945808 | -0.744727239 | 0.264760632 | -2.812832233 | 0.004910726 | 0.024494321 |
| ENSMUSG000000115388 | 35212.61326 | -0.744484883 | 0.114590792 | -6.496899721 | 8.20E-11    | 2.51E-09    |
| ENSMUSG000000108105 | 54.11529943 | -0.744400078 | 0.348548657 | -2.135713517 | 0.032702772 | 0.109835018 |
| ENSMUSG000000045744 | 88.82106616 | -0.744282819 | 0.283424554 | -2.626035071 | 0.008638592 | 0.038653538 |
| ENSMUSG00000007783  | 207.3599328 | -0.743924115 | 0.20254112  | -3.672953491 | 0.000239763 | 0.001960747 |
| ENSMUSG000000015305 | 3268.642466 | -0.743759651 | 0.144134516 | -5.160177254 | 2.47E-07    | 4.26E-06    |
| ENSMUSG000000034586 | 1144.998853 | -0.743659147 | 0.186421875 | -3.989119548 | 6.63E-05    | 0.000644717 |
| ENSMUSG000000109325 | 280.4541374 | -0.742470447 | 0.186330664 | -3.984692762 | 6.76E-05    | 0.000654856 |
| ENSMUSG000000024906 | 2532.094688 | -0.742232531 | 0.207883782 | -3.570420571 | 0.000356409 | 0.002773296 |
| ENSMUSG000000006586 | 92.40461915 | -0.741996401 | 0.322088192 | -2.303705691 | 0.02123917  | 0.07822539  |
| ENSMUSG000000040502 | 536.3972389 | -0.741941011 | 0.155113491 | -4.783213926 | 1.73E-06    | 2.48E-05    |
| ENSMUSG000000034853 | 2073.470981 | -0.741577108 | 0.158031856 | -4.69257987  | 2.70E-06    | 3.70E-05    |
| ENSMUSG000000032010 | 1247.175329 | -0.741038207 | 0.112655306 | -6.577925467 | 4.77E-11    | 1.50E-09    |
| ENSMUSG000000086873 | 105.2511281 | -0.740267414 | 0.25373262  | -2.917509836 | 0.003528385 | 0.018694825 |
| ENSMUSG000000027397 | 2486.597067 | -0.739535622 | 0.128997153 | -5.732960796 | 9.87E-09    | 2.20E-07    |
| ENSMUSG000000022836 | 2861.325594 | -0.738743939 | 0.183639272 | -4.02279933  | 5.75E-05    | 0.000566494 |
| ENSMUSG000000097773 | 141.7434045 | -0.73862985  | 0.302697068 | -2.44016189  | 0.014680681 | 0.058630708 |
| ENSMUSG000000007476 | 528.9737413 | -0.737955487 | 0.169053322 | -4.365223211 | 1.27E-05    | 0.000147966 |
| ENSMUSG000000045287 | 2375.883569 | -0.737735354 | 0.143975328 | -5.124040089 | 2.99E-07    | 5.06E-06    |
| ENSMUSG000000058070 | 208.239549  | -0.737581882 | 0.222996559 | -3.307593117 | 0.000941014 | 0.006328576 |
| ENSMUSG000000042616 | 137.0263326 | -0.736994052 | 0.253236818 | -2.910295815 | 0.003610868 | 0.019005422 |
| ENSMUSG000000097099 | 200.9840563 | -0.736121802 | 0.233096743 | -3.158009813 | 0.001588502 | 0.0097429   |
| ENSMUSG000000071656 | 82.68261869 | -0.735973121 | 0.333499766 | -2.206817502 | 0.027326812 | 0.095367061 |
| ENSMUSG000000075162 | 49.43599105 | -0.734356898 | 0.352482041 | -2.083388121 | 0.03721586  | 0.120948834 |
| ENSMUSG000000024883 | 298.4695731 | -0.734086947 | 0.17266638  | -4.251475856 | 2.12E-05    | 0.000233415 |



|                    |             |              |             |              |             |             |
|--------------------|-------------|--------------|-------------|--------------|-------------|-------------|
| ENSMUSG00000071073 | 59.28456054 | -0.734082619 | 0.370549351 | -1.981065725 | 0.047583903 | 0.145837869 |
| ENSMUSG00000101166 | 195.9838404 | -0.734066862 | 0.255859419 | -2.869024185 | 0.004117403 | 0.02119137  |
| ENSMUSG00000052212 | 1317.119455 | -0.734037296 | 0.168890177 | -4.346240315 | 1.38E-05    | 0.000160108 |
| ENSMUSG00000048330 | 203.3512748 | -0.733796774 | 0.227365462 | -3.227388922 | 0.001249255 | 0.007964449 |
| ENSMUSG00000030074 | 74.16908873 | -0.733579542 | 0.300393614 | -2.442061039 | 0.014603677 | 0.058374481 |
| ENSMUSG00000044033 | 608.8175009 | -0.73314574  | 0.18148731  | -4.039652904 | 5.35E-05    | 0.000531988 |
| ENSMUSG00000075391 | 109.7974526 | -0.73293757  | 0.331694364 | -2.209677489 | 0.027127553 | 0.0948975   |
| ENSMUSG00000028047 | 126.7287251 | -0.732883816 | 0.299122996 | -2.450108571 | 0.014281315 | 0.057405839 |
| ENSMUSG00000039648 | 891.3686479 | -0.732759109 | 0.140564288 | -5.212982044 | 1.86E-07    | 3.29E-06    |
| ENSMUSG00000022193 | 1656.035008 | -0.732382763 | 0.18468321  | -3.965616388 | 7.32E-05    | 0.000701581 |
| ENSMUSG00000071856 | 6811.792101 | -0.731918585 | 0.09901579  | -7.391938059 | 1.45E-13    | 6.08E-12    |
| ENSMUSG00000027276 | 1498.307464 | -0.731532062 | 0.12757706  | -5.734040768 | 9.81E-09    | 2.19E-07    |
| ENSMUSG00000028378 | 3590.290967 | -0.731223581 | 0.160093295 | -4.567484113 | 4.94E-06    | 6.39E-05    |
| ENSMUSG00000003469 | 117.4320533 | -0.730732209 | 0.280168175 | -2.608191345 | 0.009102206 | 0.040291443 |
| ENSMUSG00000051113 | 263.5296338 | -0.73046882  | 0.295353512 | -2.473201737 | 0.013390853 | 0.05441498  |
| ENSMUSG00000025213 | 42.91822042 | -0.730354249 | 0.368349318 | -1.982776169 | 0.047392437 | 0.145398093 |
| ENSMUSG00000035828 | 4324.911816 | -0.728640862 | 0.180395117 | -4.039138487 | 5.36E-05    | 0.000532918 |
| ENSMUSG00000021375 | 11081.81295 | -0.728125448 | 0.094885547 | -7.673723423 | 1.67E-14    | 7.91E-13    |
| ENSMUSG00000032726 | 84.81244898 | -0.727953597 | 0.303783126 | -2.396293723 | 0.016561813 | 0.064222741 |
| ENSMUSG00000064307 | 183.8354041 | -0.727832324 | 0.195218908 | -3.728288049 | 0.000192785 | 0.001622376 |
| ENSMUSG00000111312 | 47.03825482 | -0.726968726 | 0.363702895 | -1.998798295 | 0.045630182 | 0.141411714 |
| ENSMUSG00000049916 | 531.0306657 | -0.725577209 | 0.144254338 | -5.029846709 | 4.91E-07    | 7.91E-06    |
| ENSMUSG00000038811 | 92.28305317 | -0.725569103 | 0.280702003 | -2.58483764  | 0.009742486 | 0.042501406 |
| ENSMUSG00000015957 | 64.2128147  | -0.724867757 | 0.355774447 | -2.037436253 | 0.041606344 | 0.131967441 |
| ENSMUSG00000086513 | 60620.44648 | -0.724569043 | 0.206233446 | -3.513344009 | 0.000442504 | 0.003341534 |
| ENSMUSG00000021700 | 121.9085305 | -0.723434681 | 0.330603508 | -2.188224454 | 0.028653257 | 0.098808764 |
| ENSMUSG00000108391 | 135.2789574 | -0.723318055 | 0.36874792  | -1.961551553 | 0.049814717 | 0.15069425  |
| ENSMUSG00000020167 | 9308.463072 | -0.722442977 | 0.09459709  | -7.637052859 | 2.22E-14    | 1.03E-12    |
| ENSMUSG00000035172 | 1165.603732 | -0.72196718  | 0.12768349  | -5.654350314 | 1.56E-08    | 3.37E-07    |

|                     |             |              |             |              |             |             |
|---------------------|-------------|--------------|-------------|--------------|-------------|-------------|
| ENSMUSG00000073415  | 297.7103718 | -0.721902133 | 0.197479573 | -3.655578761 | 0.000256602 | 0.00207487  |
| ENSMUSG00000005718  | 2932.923848 | -0.720301804 | 0.107762202 | -6.684178567 | 2.32E-11    | 7.70E-10    |
| ENSMUSG00000079139  | 291.8881487 | -0.719916282 | 0.202276387 | -3.559072283 | 0.000372167 | 0.002878841 |
| ENSMUSG00000066196  | 54.88282945 | -0.719578342 | 0.317013016 | -2.269870023 | 0.02321547  | 0.083883378 |
| ENSMUSG000000112908 | 59.37477285 | -0.718199491 | 0.352978408 | -2.034683922 | 0.041882687 | 0.13254233  |
| ENSMUSG00000038319  | 92.46933065 | -0.71818212  | 0.324004096 | -2.216583462 | 0.026651569 | 0.093702764 |
| ENSMUSG00000013236  | 5690.262853 | -0.717937707 | 0.125030422 | -5.742104147 | 9.35E-09    | 2.10E-07    |
| ENSMUSG000000113128 | 89.06035709 | -0.717120189 | 0.326572151 | -2.195901236 | 0.028099013 | 0.097377113 |
| ENSMUSG00000061762  | 426.4999941 | -0.71688923  | 0.260235851 | -2.754767367 | 0.005873388 | 0.028253327 |
| ENSMUSG00000034245  | 3594.344662 | -0.716506697 | 0.145393414 | -4.928054684 | 8.31E-07    | 1.27E-05    |
| ENSMUSG00000032849  | 765.4884031 | -0.716127518 | 0.178529529 | -4.011255285 | 6.04E-05    | 0.000591528 |
| ENSMUSG00000001123  | 17170.68481 | -0.714585772 | 0.118286986 | -6.041119107 | 1.53E-09    | 3.89E-08    |
| ENSMUSG000000103789 | 66.36316829 | -0.714175367 | 0.303081029 | -2.35638426  | 0.018453817 | 0.069965757 |
| ENSMUSG00000022346  | 15167.97107 | -0.713718539 | 0.125910916 | -5.668440545 | 1.44E-08    | 3.12E-07    |
| ENSMUSG00000099931  | 307.0094066 | -0.713214901 | 0.199044715 | -3.583189334 | 0.000339424 | 0.002655035 |
| ENSMUSG00000056501  | 2331.430306 | -0.711242457 | 0.112392399 | -6.32820779  | 2.48E-10    | 7.06E-09    |
| ENSMUSG00000026956  | 1289.573604 | -0.710390963 | 0.148581217 | -4.781162639 | 1.74E-06    | 2.50E-05    |
| ENSMUSG00000047654  | 151.5276328 | -0.71024022  | 0.220920309 | -3.214915922 | 0.001304827 | 0.008252681 |
| ENSMUSG00000050747  | 126.2650743 | -0.709889963 | 0.354592063 | -2.00199056  | 0.045285747 | 0.140617856 |
| ENSMUSG00000048329  | 267.8036907 | -0.709813749 | 0.21984787  | -3.228658742 | 0.001243722 | 0.007933709 |
| ENSMUSG00000026496  | 9927.000814 | -0.709633665 | 0.127143316 | -5.581368243 | 2.39E-08    | 4.97E-07    |
| ENSMUSG00000046861  | 4782.412831 | -0.708713224 | 0.125013122 | -5.669110677 | 1.44E-08    | 3.11E-07    |
| ENSMUSG00000022805  | 47.32842658 | -0.708312749 | 0.359684282 | -1.969262448 | 0.048922961 | 0.148873874 |
| ENSMUSG00000087543  | 169.080138  | -0.707857699 | 0.208745827 | -3.391002871 | 0.000696374 | 0.004896495 |
| ENSMUSG000000111291 | 150.9475531 | -0.707673074 | 0.271143247 | -2.609960165 | 0.009055277 | 0.040107592 |
| ENSMUSG00000073043  | 689.254373  | -0.707254451 | 0.204284581 | -3.462103938 | 0.00053597  | 0.003924054 |
| ENSMUSG00000043243  | 205.2728027 | -0.706444647 | 0.182595163 | -3.868912167 | 0.000109322 | 0.000989454 |
| ENSMUSG00000049382  | 86807.24206 | -0.706207376 | 0.118009177 | -5.98434286  | 2.17E-09    | 5.41E-08    |
| ENSMUSG00000020905  | 5202.038176 | -0.706104446 | 0.101967898 | -6.924771985 | 4.37E-12    | 1.58E-10    |

|                    |             |              |             |              |             |             |
|--------------------|-------------|--------------|-------------|--------------|-------------|-------------|
| ENSMUSG00000021814 | 2605.922599 | -0.705058763 | 0.178059731 | -3.959675552 | 7.51E-05    | 0.00071588  |
| ENSMUSG00000087484 | 106.1574097 | -0.704679344 | 0.269721472 | -2.612618634 | 0.00898515  | 0.039851276 |
| ENSMUSG00000024190 | 6547.037464 | -0.704322789 | 0.352892429 | -1.995856902 | 0.045949501 | 0.14206569  |
| ENSMUSG00000066894 | 3652.936598 | -0.703728534 | 0.10915013  | -6.447344884 | 1.14E-10    | 3.43E-09    |
| ENSMUSG00000071103 | 123.3646789 | -0.702582021 | 0.247610808 | -2.83744489  | 0.00454762  | 0.022934524 |
| ENSMUSG00000030124 | 658.128952  | -0.702128176 | 0.188165219 | -3.731445055 | 0.000190385 | 0.001604598 |
| ENSMUSG00000038980 | 824.7291819 | -0.702075485 | 0.171728537 | -4.088286662 | 4.35E-05    | 0.000442326 |
| ENSMUSG00000086604 | 57.09132256 | -0.701214509 | 0.339256267 | -2.066916892 | 0.038741986 | 0.125010077 |
| ENSMUSG00000100183 | 72.71638464 | -0.700385467 | 0.282841092 | -2.476250753 | 0.013277029 | 0.054080553 |
| ENSMUSG00000035547 | 1548.823353 | -0.698217387 | 0.112807534 | -6.189457065 | 6.04E-10    | 1.62E-08    |
| ENSMUSG00000042349 | 3302.010177 | -0.698203417 | 0.130353716 | -5.356221827 | 8.50E-08    | 1.63E-06    |
| ENSMUSG00000078439 | 7576.789742 | -0.698181316 | 0.153298712 | -4.554384741 | 5.25E-06    | 6.75E-05    |
| ENSMUSG00000097197 | 90.85805753 | -0.697480942 | 0.276717658 | -2.520550899 | 0.011717129 | 0.049034283 |
| ENSMUSG00000030214 | 2855.509903 | -0.69737679  | 0.14130098  | -4.935399523 | 8.00E-07    | 1.23E-05    |
| ENSMUSG00000062867 | 17239.80661 | -0.696939828 | 0.114622614 | -6.080299546 | 1.20E-09    | 3.09E-08    |
| ENSMUSG00000097013 | 72.69049105 | -0.695774292 | 0.344174807 | -2.021572402 | 0.043220546 | 0.13565959  |
| ENSMUSG00000049892 | 1445.843767 | -0.695736307 | 0.205323534 | -3.388487883 | 0.000702791 | 0.004934808 |
| ENSMUSG00000093606 | 168.6765321 | -0.695272242 | 0.238981101 | -2.909318935 | 0.003622171 | 0.01905592  |
| ENSMUSG00000096740 | 243.2904009 | -0.693797208 | 0.255841567 | -2.711823637 | 0.006691418 | 0.031462223 |
| ENSMUSG00000074604 | 1169.712635 | -0.69373886  | 0.129396721 | -5.361332617 | 8.26E-08    | 1.58E-06    |
| ENSMUSG00000051146 | 86.07977177 | -0.692855652 | 0.320598226 | -2.161133767 | 0.030685008 | 0.104156219 |
| ENSMUSG00000001288 | 111.0887641 | -0.691938725 | 0.27924186  | -2.477919051 | 0.013215112 | 0.053877554 |
| ENSMUSG00000017607 | 4599.548869 | -0.691722774 | 0.142642143 | -4.849357714 | 1.24E-06    | 1.83E-05    |
| ENSMUSG00000034275 | 1937.798796 | -0.691716267 | 0.206685364 | -3.346711418 | 0.000817763 | 0.005613091 |
| ENSMUSG00000085890 | 672.6565083 | -0.691459559 | 0.136204838 | -5.076615262 | 3.84E-07    | 6.34E-06    |
| ENSMUSG00000057246 | 144.902492  | -0.691366907 | 0.227205103 | -3.042919802 | 0.002342948 | 0.013418099 |
| ENSMUSG00000037126 | 87.21862064 | -0.690986313 | 0.336789842 | -2.051683948 | 0.040200388 | 0.128587041 |
| ENSMUSG00000030729 | 2230.924277 | -0.690935211 | 0.142239839 | -4.857536502 | 1.19E-06    | 1.76E-05    |
| ENSMUSG00000024736 | 1556.900055 | -0.689353376 | 0.13550415  | -5.087322973 | 3.63E-07    | 6.02E-06    |

|                     |             |              |             |              |             |             |
|---------------------|-------------|--------------|-------------|--------------|-------------|-------------|
| ENSMUSG00000044365  | 65.33369548 | -0.689099768 | 0.324331852 | -2.12467497  | 0.033613743 | 0.111935684 |
| ENSMUSG00000016637  | 404.0047253 | -0.688782004 | 0.150178231 | -4.586430395 | 4.51E-06    | 5.89E-05    |
| ENSMUSG00000004085  | 6932.041292 | -0.688464535 | 0.14527505  | -4.739041813 | 2.15E-06    | 3.00E-05    |
| ENSMUSG00000035944  | 1171.111661 | -0.687955673 | 0.13982021  | -4.920287806 | 8.64E-07    | 1.32E-05    |
| ENSMUSG00000073433  | 237.1210805 | -0.685890343 | 0.1901471   | -3.607156476 | 0.000309571 | 0.002452484 |
| ENSMUSG00000053128  | 362.3784185 | -0.685868189 | 0.263957798 | -2.598400935 | 0.009365907 | 0.041213315 |
| ENSMUSG00000023247  | 1166.803533 | -0.684775035 | 0.194256977 | -3.525098791 | 0.000423325 | 0.003216548 |
| ENSMUSG00000040891  | 2483.829583 | -0.684081003 | 0.141350047 | -4.839623444 | 1.30E-06    | 1.91E-05    |
| ENSMUSG00000012126  | 117.2210002 | -0.683527667 | 0.265572258 | -2.573791678 | 0.010059082 | 0.043555509 |
| ENSMUSG000000111665 | 86.52102118 | -0.682910035 | 0.286839129 | -2.380811982 | 0.017274526 | 0.066432008 |
| ENSMUSG00000068262  | 87.51242226 | -0.682757091 | 0.284566954 | -2.399284531 | 0.016427145 | 0.063833726 |
| ENSMUSG00000049649  | 95.39338541 | -0.682422668 | 0.31183884  | -2.188382523 | 0.02864175  | 0.09878436  |
| ENSMUSG00000020140  | 7875.731328 | -0.679616661 | 0.131144734 | -5.182187965 | 2.19E-07    | 3.82E-06    |
| ENSMUSG00000019978  | 5081.194689 | -0.679465287 | 0.103132251 | -6.588291077 | 4.45E-11    | 1.40E-09    |
| ENSMUSG00000050106  | 284.7849543 | -0.678853288 | 0.231888772 | -2.92749529  | 0.003417042 | 0.01823922  |
| ENSMUSG00000021830  | 1900.168914 | -0.678524639 | 0.128211001 | -5.29224974  | 1.21E-07    | 2.23E-06    |
| ENSMUSG00000085704  | 993.3598659 | -0.678160537 | 0.214016688 | -3.168727373 | 0.001531079 | 0.009437424 |
| ENSMUSG00000015312  | 3021.110192 | -0.676878877 | 0.196639376 | -3.44223467  | 0.00057693  | 0.004180021 |
| ENSMUSG000000110750 | 49.16324541 | -0.676752418 | 0.340665508 | -1.986559844 | 0.046971195 | 0.144503327 |
| ENSMUSG00000042104  | 91.83077423 | -0.675528122 | 0.277986705 | -2.430073486 | 0.015095762 | 0.059808929 |
| ENSMUSG00000060224  | 1184.78261  | -0.673884467 | 0.146697215 | -4.593710035 | 4.35E-06    | 5.71E-05    |
| ENSMUSG00000041607  | 4847.208878 | -0.673846394 | 0.13030676  | -5.171231293 | 2.33E-07    | 4.03E-06    |
| ENSMUSG00000026688  | 3171.894867 | -0.67333638  | 0.137079174 | -4.91202536  | 9.01E-07    | 1.37E-05    |
| ENSMUSG00000055159  | 64.25505107 | -0.672447158 | 0.337369795 | -1.99320499  | 0.046239005 | 0.142762848 |
| ENSMUSG00000020334  | 133.8044897 | -0.672000641 | 0.284082703 | -2.365510587 | 0.018005229 | 0.068661867 |
| ENSMUSG00000038425  | 1149.363834 | -0.671788776 | 0.126018062 | -5.33089277  | 9.77E-08    | 1.84E-06    |
| ENSMUSG00000015846  | 3673.440439 | -0.671665273 | 0.11481584  | -5.849935607 | 4.92E-09    | 1.15E-07    |
| ENSMUSG00000057969  | 3391.939844 | -0.671260795 | 0.166070056 | -4.042033902 | 5.30E-05    | 0.000527789 |
| ENSMUSG00000026856  | 1659.369019 | -0.670930949 | 0.136390516 | -4.919190641 | 8.69E-07    | 1.33E-05    |

|                    |             |              |             |              |             |             |
|--------------------|-------------|--------------|-------------|--------------|-------------|-------------|
| ENSMUSG00000044551 | 100.4597016 | -0.670633415 | 0.251611212 | -2.665355844 | 0.00769069  | 0.035224906 |
| ENSMUSG00000037466 | 2612.460269 | -0.670043969 | 0.112317868 | -5.965604438 | 2.44E-09    | 6.02E-08    |
| ENSMUSG00000006360 | 5035.079332 | -0.669299327 | 0.125542116 | -5.331273285 | 9.75E-08    | 1.84E-06    |
| ENSMUSG00000018983 | 1805.615412 | -0.668687212 | 0.142084077 | -4.706278339 | 2.52E-06    | 3.48E-05    |
| ENSMUSG00000069793 | 7651.549333 | -0.667792232 | 0.200811798 | -3.325463142 | 0.000882718 | 0.006003503 |
| ENSMUSG00000063160 | 141.5375272 | -0.667001124 | 0.255216243 | -2.613474424 | 0.008962679 | 0.039792297 |
| ENSMUSG00000038776 | 1269.926409 | -0.6664249   | 0.190167137 | -3.50441675  | 0.000457609 | 0.003434914 |
| ENSMUSG00000033998 | 3617.977741 | -0.665675562 | 0.108416799 | -6.139966923 | 8.25E-10    | 2.19E-08    |
| ENSMUSG00000041605 | 4609.377087 | -0.664658164 | 0.100760655 | -6.596405775 | 4.21E-11    | 1.34E-09    |
| ENSMUSG00000029061 | 101.724112  | -0.664374278 | 0.274305496 | -2.422023207 | 0.015434365 | 0.060928237 |
| ENSMUSG00000040562 | 1344.411125 | -0.664359499 | 0.173715247 | -3.82441674  | 0.000131082 | 0.001159564 |
| ENSMUSG00000045005 | 13832.87356 | -0.663783889 | 0.111949879 | -5.929295293 | 3.04E-09    | 7.42E-08    |
| ENSMUSG00000045730 | 622.4504468 | -0.663359391 | 0.266546681 | -2.488717501 | 0.012820479 | 0.052547235 |
| ENSMUSG00000075611 | 740.857167  | -0.661447079 | 0.226019113 | -2.926509493 | 0.00342789  | 0.018281022 |
| ENSMUSG00000034686 | 103.517424  | -0.660757352 | 0.300486389 | -2.198959338 | 0.027880814 | 0.096803678 |
| ENSMUSG00000050627 | 4453.702827 | -0.660667853 | 0.107838681 | -6.12644598  | 8.99E-10    | 2.36E-08    |
| ENSMUSG00000101655 | 450.1710603 | -0.660652666 | 0.157923396 | -4.183374233 | 2.87E-05    | 0.000304717 |
| ENSMUSG00000038058 | 1279.928087 | -0.660018845 | 0.133519962 | -4.943222222 | 7.68E-07    | 1.19E-05    |
| ENSMUSG00000030091 | 8954.956784 | -0.658912723 | 0.129858385 | -5.074086854 | 3.89E-07    | 6.41E-06    |
| ENSMUSG00000045165 | 154.7532421 | -0.658648383 | 0.205477191 | -3.205457405 | 0.00134848  | 0.008492206 |
| ENSMUSG00000052040 | 6430.956383 | -0.658482779 | 0.123722414 | -5.322259376 | 1.02E-07    | 1.92E-06    |
| ENSMUSG00000026961 | 292.0375344 | -0.657684691 | 0.233842728 | -2.812508636 | 0.00491567  | 0.024513498 |
| ENSMUSG00000037788 | 456.7596461 | -0.657447907 | 0.184424317 | -3.564865615 | 0.000364043 | 0.002825797 |
| ENSMUSG00000000782 | 1151.529234 | -0.657367775 | 0.145846992 | -4.507242592 | 6.57E-06    | 8.21E-05    |
| ENSMUSG00000037846 | 167.2766204 | -0.657347279 | 0.214781821 | -3.060534998 | 0.002209419 | 0.012784516 |
| ENSMUSG00000084835 | 143.9292497 | -0.657238946 | 0.262951436 | -2.499468941 | 0.01243796  | 0.051290486 |
| ENSMUSG00000063065 | 6889.624324 | -0.65703662  | 0.125198267 | -5.247968964 | 1.54E-07    | 2.77E-06    |
| ENSMUSG00000085894 | 138.5433051 | -0.656247518 | 0.246189936 | -2.665614723 | 0.007684771 | 0.035205027 |
| ENSMUSG00000056753 | 907.7423323 | -0.656232559 | 0.196997254 | -3.33117618  | 0.000864799 | 0.00590194  |

|                    |             |              |             |              |             |              |
|--------------------|-------------|--------------|-------------|--------------|-------------|--------------|
| ENSMUSG00000097643 | 114.0123197 | -0.655873698 | 0.260061405 | -2.521995516 | 0.01166912  | 0.048860878  |
| ENSMUSG00000104719 | 702.5626954 | -0.654990246 | 0.192520228 | -3.402189231 | 0.000668483 | 0.00473265   |
| ENSMUSG00000075302 | 62.05519447 | -0.653682924 | 0.307011602 | -2.129179875 | 0.033239381 | 0.1111101835 |
| ENSMUSG00000023262 | 1813.788158 | -0.6536384   | 0.132216245 | -4.943707175 | 7.67E-07    | 1.19E-05     |
| ENSMUSG00000022178 | 333.0212484 | -0.653581078 | 0.192098937 | -3.40231492  | 0.000668176 | 0.004732405  |
| ENSMUSG00000001604 | 3254.7876   | -0.653552971 | 0.161365419 | -4.050142677 | 5.12E-05    | 0.000511887  |
| ENSMUSG00000035711 | 136.6309853 | -0.652937249 | 0.252824445 | -2.582571671 | 0.009806699 | 0.042698008  |
| ENSMUSG00000039457 | 1588.119904 | -0.652158825 | 0.117121954 | -5.568203099 | 2.57E-08    | 5.31E-07     |
| ENSMUSG00000091956 | 592.9813486 | -0.652071125 | 0.161316664 | -4.042180825 | 5.30E-05    | 0.000527694  |
| ENSMUSG00000034265 | 742.8990661 | -0.651645959 | 0.135030562 | -4.825914584 | 1.39E-06    | 2.03E-05     |
| ENSMUSG00000044636 | 866.1801777 | -0.651280497 | 0.134471211 | -4.843270846 | 1.28E-06    | 1.88E-05     |
| ENSMUSG00000096950 | 243.1564885 | -0.651194909 | 0.196581356 | -3.312597496 | 0.000924339 | 0.006237121  |
| ENSMUSG00000048696 | 1371.777601 | -0.650143849 | 0.131996287 | -4.925470733 | 8.42E-07    | 1.29E-05     |
| ENSMUSG00000102840 | 81.06738486 | -0.649649424 | 0.277919642 | -2.337544118 | 0.01941091  | 0.072741169  |
| ENSMUSG00000044390 | 167.5333893 | -0.648492747 | 0.208678881 | -3.107610815 | 0.001886063 | 0.011228265  |
| ENSMUSG00000040624 | 744.2873457 | -0.64787199  | 0.165522358 | -3.914105619 | 9.07E-05    | 0.00084106   |
| ENSMUSG00000078619 | 11517.39787 | -0.647384151 | 0.094619801 | -6.841952171 | 7.81E-12    | 2.73E-10     |
| ENSMUSG00000027225 | 293.7445955 | -0.647301446 | 0.280809229 | -2.305128813 | 0.02115936  | 0.077957194  |
| ENSMUSG00000024424 | 256.0694862 | -0.647007404 | 0.256241514 | -2.524990558 | 0.01157014  | 0.04856497   |
| ENSMUSG00000010175 | 476.451475  | -0.64672985  | 0.169811205 | -3.808522827 | 0.000139799 | 0.001227142  |
| ENSMUSG00000056602 | 2371.641283 | -0.646621533 | 0.212223762 | -3.046885642 | 0.002312257 | 0.013255908  |
| ENSMUSG00000034684 | 403.0426595 | -0.645602026 | 0.162869664 | -3.963918211 | 7.37E-05    | 0.000705683  |
| ENSMUSG00000026187 | 2027.80167  | -0.644472714 | 0.139911577 | -4.606285824 | 4.10E-06    | 5.42E-05     |
| ENSMUSG00000032593 | 678.6779    | -0.643864401 | 0.167097034 | -3.853236572 | 0.000116567 | 0.001046098  |
| ENSMUSG00000053646 | 2950.493772 | -0.643819681 | 0.143269242 | -4.493774604 | 7.00E-06    | 8.68E-05     |
| ENSMUSG00000020592 | 7192.492012 | -0.642630137 | 0.10479068  | -6.132512303 | 8.65E-10    | 2.28E-08     |
| ENSMUSG00000037992 | 3364.943051 | -0.639235909 | 0.10269617  | -6.224535053 | 4.83E-10    | 1.32E-08     |
| ENSMUSG00000000532 | 3589.086538 | -0.639063364 | 0.136782621 | -4.672109373 | 2.98E-06    | 4.03E-05     |
| ENSMUSG00000074340 | 146.3767662 | -0.638292808 | 0.217861787 | -2.929806171 | 0.003391735 | 0.018125828  |

|                    |             |              |             |              |             |             |
|--------------------|-------------|--------------|-------------|--------------|-------------|-------------|
| ENSMUSG00000040430 | 231.4784507 | -0.637756624 | 0.192127436 | -3.319445872 | 0.000901963 | 0.006113883 |
| ENSMUSG00000031824 | 430.0636553 | -0.636508249 | 0.209433011 | -3.039197327 | 0.002372094 | 0.013550224 |
| ENSMUSG00000028634 | 163.6269207 | -0.636090334 | 0.207113299 | -3.071219164 | 0.002131866 | 0.012406771 |
| ENSMUSG00000038604 | 701.5390103 | -0.635963989 | 0.129751274 | -4.901408431 | 9.52E-07    | 1.44E-05    |
| ENSMUSG00000047146 | 627.1957682 | -0.635562729 | 0.148336302 | -4.284606814 | 1.83E-05    | 0.000205356 |
| ENSMUSG00000055675 | 965.0001017 | -0.635425669 | 0.215936988 | -2.942643944 | 0.003254225 | 0.017538229 |
| ENSMUSG00000067714 | 1149.398447 | -0.635219774 | 0.117368759 | -5.412170846 | 6.23E-08    | 1.22E-06    |
| ENSMUSG00000020099 | 422.7611156 | -0.635068659 | 0.179491387 | -3.538156729 | 0.000402931 | 0.003081536 |
| ENSMUSG00000016526 | 362.7747409 | -0.634977574 | 0.170345272 | -3.727591428 | 0.000193318 | 0.001626173 |
| ENSMUSG00000063445 | 1039.020317 | -0.633756204 | 0.126866894 | -4.995441936 | 5.87E-07    | 9.25E-06    |
| ENSMUSG00000089854 | 85.55309551 | -0.633619227 | 0.26976985  | -2.348739959 | 0.018837057 | 0.071080408 |
| ENSMUSG00000033059 | 3997.492183 | -0.632945392 | 0.10820631  | -5.84943147  | 4.93E-09    | 1.16E-07    |
| ENSMUSG00000068547 | 170.2460651 | -0.632943574 | 0.266038362 | -2.379144005 | 0.017352895 | 0.066675899 |
| ENSMUSG00000029445 | 473.6313492 | -0.632489975 | 0.265426525 | -2.382919244 | 0.017175962 | 0.066121375 |
| ENSMUSG00000071041 | 260.7273385 | -0.632450427 | 0.190845382 | -3.313941478 | 0.000919908 | 0.006216263 |
| ENSMUSG00000097088 | 106.9354123 | -0.631584164 | 0.258633731 | -2.442002296 | 0.014606054 | 0.058374481 |
| ENSMUSG00000028391 | 424.3362949 | -0.631348399 | 0.181344101 | -3.481493993 | 0.000498625 | 0.003702909 |
| ENSMUSG00000032577 | 2594.986049 | -0.631006319 | 0.115075523 | -5.483410413 | 4.17E-08    | 8.35E-07    |
| ENSMUSG00000078653 | 298.397495  | -0.630388296 | 0.205670105 | -3.065045823 | 0.002176366 | 0.012615667 |
| ENSMUSG00000041570 | 135.4898427 | -0.62961451  | 0.247961658 | -2.539160758 | 0.011111875 | 0.047129313 |
| ENSMUSG00000006494 | 3555.537069 | -0.629545594 | 0.098982112 | -6.360195626 | 2.01E-10    | 5.85E-09    |
| ENSMUSG00000043372 | 251.4942752 | -0.629492126 | 0.185987277 | -3.384597793 | 0.000712826 | 0.004994262 |
| ENSMUSG00000022686 | 72.73099329 | -0.629252956 | 0.294898166 | -2.133797456 | 0.032859364 | 0.110228141 |
| ENSMUSG00000052949 | 487.0919591 | -0.628315719 | 0.221046434 | -2.842460328 | 0.00447668  | 0.022633064 |
| ENSMUSG00000026200 | 983.2077299 | -0.626296604 | 0.17919842  | -3.494989543 | 0.00047408  | 0.003541864 |
| ENSMUSG00000027317 | 2519.491373 | -0.625626626 | 0.121592332 | -5.145280255 | 2.67E-07    | 4.58E-06    |
| ENSMUSG00000028607 | 2436.056129 | -0.625296283 | 0.116766325 | -5.355108    | 8.55E-08    | 1.63E-06    |
| ENSMUSG00000044345 | 533.7784358 | -0.624998624 | 0.163339757 | -3.826371708 | 0.000130046 | 0.001152226 |
| ENSMUSG00000015467 | 76.12963893 | -0.624111546 | 0.303421334 | -2.056913854 | 0.039694513 | 0.12737084  |

|                    |             |              |             |              |             |             |
|--------------------|-------------|--------------|-------------|--------------|-------------|-------------|
| ENSMUSG00000063785 | 3439.998487 | -0.623793209 | 0.136012335 | -4.586298811 | 4.51E-06    | 5.89E-05    |
| ENSMUSG00000022419 | 6202.83176  | -0.623204739 | 0.1502278   | -4.148398222 | 3.35E-05    | 0.000349396 |
| ENSMUSG00000090207 | 320.7190965 | -0.623067279 | 0.20050497  | -3.107490439 | 0.001886831 | 0.011229841 |
| ENSMUSG00000027950 | 247.4692573 | -0.62256002  | 0.189923984 | -3.277943129 | 0.001045665 | 0.006907395 |
| ENSMUSG00000023079 | 7909.839128 | -0.622070565 | 0.110511905 | -5.628991417 | 1.81E-08    | 3.86E-07    |
| ENSMUSG00000001995 | 3372.702043 | -0.621948137 | 0.120582518 | -5.15786323  | 2.50E-07    | 4.30E-06    |
| ENSMUSG00000087396 | 795.3635688 | -0.621587754 | 0.159522286 | -3.896557458 | 9.76E-05    | 0.000897279 |
| ENSMUSG00000016128 | 2595.064208 | -0.621502426 | 0.133603943 | -4.651826986 | 3.29E-06    | 4.41E-05    |
| ENSMUSG00000056214 | 233.4250742 | -0.621476007 | 0.202580808 | -3.067793103 | 0.002156459 | 0.012523746 |
| ENSMUSG00000041440 | 1582.474714 | -0.619980148 | 0.129881344 | -4.773434953 | 1.81E-06    | 2.58E-05    |
| ENSMUSG00000060147 | 2605.162232 | -0.619514317 | 0.137116054 | -4.518174917 | 6.24E-06    | 7.83E-05    |
| ENSMUSG00000036975 | 609.0894306 | -0.618485942 | 0.133089565 | -4.64714076  | 3.37E-06    | 4.49E-05    |
| ENSMUSG00000062093 | 122.7416796 | -0.618054046 | 0.24965312  | -2.475651194 | 0.013299344 | 0.054151664 |
| ENSMUSG00000079297 | 141.9556234 | -0.616544032 | 0.28316851  | -2.177304364 | 0.029457866 | 0.100953317 |
| ENSMUSG00000020973 | 88.73168151 | -0.616317432 | 0.254720581 | -2.419582391 | 0.01553834  | 0.061233527 |
| ENSMUSG00000031840 | 281.3082491 | -0.616139772 | 0.17956541  | -3.431283187 | 0.000600733 | 0.004325783 |
| ENSMUSG00000057315 | 250.3608225 | -0.616055737 | 0.237695493 | -2.591785514 | 0.009547928 | 0.041824462 |
| ENSMUSG00000029821 | 308.29715   | -0.615345351 | 0.224004972 | -2.747016482 | 0.006014011 | 0.028780786 |
| ENSMUSG00000025876 | 369.5655841 | -0.615005447 | 0.200070402 | -3.073945176 | 0.002112482 | 0.012316463 |
| ENSMUSG00000090330 | 257.5844042 | -0.614622436 | 0.217234132 | -2.829308777 | 0.004664867 | 0.023430449 |
| ENSMUSG00000040433 | 13155.90746 | -0.614543139 | 0.171761996 | -3.577876085 | 0.000346398 | 0.002701053 |
| ENSMUSG00000037280 | 4953.642247 | -0.614214532 | 0.108640177 | -5.653659139 | 1.57E-08    | 3.38E-07    |
| ENSMUSG00000022090 | 244.7134149 | -0.613816064 | 0.211823431 | -2.897772261 | 0.003758234 | 0.019626524 |
| ENSMUSG00000038400 | 608.4789519 | -0.61350614  | 0.17876121  | -3.431986958 | 0.000599176 | 0.004321137 |
| ENSMUSG00000018415 | 3133.89594  | -0.61331748  | 0.151460645 | -4.049352093 | 5.14E-05    | 0.000513389 |
| ENSMUSG00000030681 | 3953.136722 | -0.612783607 | 0.116731487 | -5.249514272 | 1.53E-07    | 2.76E-06    |
| ENSMUSG00000065523 | 78.0533411  | -0.61228976  | 0.308243668 | -1.986382284 | 0.046990892 | 0.144543985 |
| ENSMUSG00000070643 | 3164.21878  | -0.61196467  | 0.112491351 | -5.44010417  | 5.32E-08    | 1.05E-06    |
| ENSMUSG00000027860 | 683.7265035 | -0.611697407 | 0.168512967 | -3.629972333 | 0.000283452 | 0.00226975  |



|                    |             |              |             |              |             |             |
|--------------------|-------------|--------------|-------------|--------------|-------------|-------------|
| ENSMUSG00000073424 | 319.8660921 | -0.610323106 | 0.220301596 | -2.770398023 | 0.005598783 | 0.027172678 |
| ENSMUSG00000016495 | 1398.748449 | -0.610262088 | 0.136238551 | -4.479364193 | 7.49E-06    | 9.20E-05    |
| ENSMUSG00000017386 | 3114.331407 | -0.610142635 | 0.113059052 | -5.396672121 | 6.79E-08    | 1.32E-06    |
| ENSMUSG00000032411 | 4502.772328 | -0.60993785  | 0.153833891 | -3.96491207  | 7.34E-05    | 0.000703051 |
| ENSMUSG00000032606 | 385.8618447 | -0.609458766 | 0.218081373 | -2.79463926  | 0.005195766 | 0.025635126 |
| ENSMUSG00000026669 | 5249.852265 | -0.608853019 | 0.141191798 | -4.312240708 | 1.62E-05    | 0.000184255 |
| ENSMUSG00000001098 | 2574.242194 | -0.608787361 | 0.12224717  | -4.979970984 | 6.36E-07    | 9.95E-06    |
| ENSMUSG00000031220 | 77.39591356 | -0.608727328 | 0.287969585 | -2.113859798 | 0.034527244 | 0.114305784 |
| ENSMUSG00000052151 | 4044.541382 | -0.608467831 | 0.136067108 | -4.471821574 | 7.76E-06    | 9.50E-05    |
| ENSMUSG00000097006 | 268.2470063 | -0.608092194 | 0.238892131 | -2.54546766  | 0.010913147 | 0.04648092  |
| ENSMUSG00000029475 | 3644.364424 | -0.607096351 | 0.116931841 | -5.191882245 | 2.08E-07    | 3.65E-06    |
| ENSMUSG00000040875 | 1379.284909 | -0.607088555 | 0.119690913 | -5.072135706 | 3.93E-07    | 6.46E-06    |
| ENSMUSG00000023050 | 480.995984  | -0.60703375  | 0.221116061 | -2.745317308 | 0.006045242 | 0.028886851 |
| ENSMUSG00000033590 | 11405.49382 | -0.605838231 | 0.115030134 | -5.266778452 | 1.39E-07    | 2.53E-06    |
| ENSMUSG00000003526 | 3543.044351 | -0.605816253 | 0.129398956 | -4.681770784 | 2.84E-06    | 3.87E-05    |
| ENSMUSG00000030703 | 181.7077162 | -0.605560471 | 0.232164841 | -2.608321175 | 0.009098754 | 0.040291443 |
| ENSMUSG00000030748 | 1584.62448  | -0.60492255  | 0.143347421 | -4.21997512  | 2.44E-05    | 0.000263354 |
| ENSMUSG00000109408 | 157.6372268 | -0.604914584 | 0.247159128 | -2.447470131 | 0.014386305 | 0.057713435 |
| ENSMUSG00000054206 | 300.1478935 | -0.604561745 | 0.187241941 | -3.228773103 | 0.001243225 | 0.007932806 |
| ENSMUSG00000006585 | 4081.38495  | -0.604330165 | 0.111325551 | -5.428494734 | 5.68E-08    | 1.12E-06    |
| ENSMUSG00000091449 | 87.95425224 | -0.602893868 | 0.270374163 | -2.229850146 | 0.025757393 | 0.091075887 |
| ENSMUSG00000050677 | 118.2663183 | -0.602784516 | 0.25521361  | -2.361882327 | 0.018182413 | 0.069147841 |
| ENSMUSG00000089715 | 1550.387    | -0.602276872 | 0.195861449 | -3.07501489  | 0.00210492  | 0.012278794 |
| ENSMUSG00000026389 | 1188.088397 | -0.60194178  | 0.132605321 | -4.539348601 | 5.64E-06    | 7.16E-05    |
| ENSMUSG00000051359 | 1414.87842  | -0.600794658 | 0.180520965 | -3.328115699 | 0.000874355 | 0.005957532 |
| ENSMUSG00000021456 | 5111.451735 | -0.600545356 | 0.123642188 | -4.857123347 | 1.19E-06    | 1.76E-05    |
| ENSMUSG00000028063 | 4802.353316 | -0.59975172  | 0.181583259 | -3.302902065 | 0.000956898 | 0.006409495 |
| ENSMUSG00000032292 | 1428.693748 | -0.599177652 | 0.209690551 | -2.857437534 | 0.004270767 | 0.021790762 |
| ENSMUSG00000046223 | 126.3396766 | -0.598921846 | 0.244344026 | -2.451141766 | 0.014240386 | 0.057272288 |

|                    |             |              |             |              |             |             |
|--------------------|-------------|--------------|-------------|--------------|-------------|-------------|
| ENSMUSG00000034112 | 2364.846749 | -0.598687977 | 0.146426606 | -4.088655696 | 4.34E-05    | 0.000441825 |
| ENSMUSG00000034312 | 3764.946948 | -0.597937147 | 0.118496726 | -5.046022532 | 4.51E-07    | 7.34E-06    |
| ENSMUSG00000047945 | 4055.045998 | -0.597923146 | 0.162599084 | -3.677284844 | 0.00023573  | 0.001932014 |
| ENSMUSG00000045216 | 3633.933532 | -0.597813795 | 0.137401087 | -4.350866558 | 1.36E-05    | 0.000157092 |
| ENSMUSG00000032252 | 1107.860605 | -0.597475404 | 0.153659779 | -3.888300568 | 0.000100949 | 0.00092454  |
| ENSMUSG00000021556 | 12305.0245  | -0.597421337 | 0.13071679  | -4.57034891  | 4.87E-06    | 6.31E-05    |
| ENSMUSG00000046408 | 177.9777621 | -0.597420208 | 0.284552397 | -2.099508613 | 0.035772089 | 0.117524067 |
| ENSMUSG00000036820 | 1302.973239 | -0.597292975 | 0.154738836 | -3.860006898 | 0.000113384 | 0.001021646 |
| ENSMUSG00000007030 | 107.3282474 | -0.597226462 | 0.297142604 | -2.009898463 | 0.044441937 | 0.138557196 |
| ENSMUSG00000041560 | 13902.71302 | -0.596745407 | 0.114110682 | -5.229531503 | 1.70E-07    | 3.05E-06    |
| ENSMUSG00000100876 | 413.0696819 | -0.596404155 | 0.172904921 | -3.449318577 | 0.000562003 | 0.004085148 |
| ENSMUSG00000046341 | 230.0867654 | -0.595923645 | 0.221149154 | -2.69466843  | 0.007045871 | 0.032796903 |
| ENSMUSG00000091086 | 186.9909756 | -0.595567399 | 0.191118774 | -3.116216085 | 0.00183188  | 0.010958356 |
| ENSMUSG00000022797 | 23035.72058 | -0.593374597 | 0.148179229 | -4.004438417 | 6.22E-05    | 0.000607512 |
| ENSMUSG00000036091 | 197.1542984 | -0.593051633 | 0.228106008 | -2.599894836 | 0.009325233 | 0.041051866 |
| ENSMUSG00000058064 | 164.9849835 | -0.592367115 | 0.230873325 | -2.56576681  | 0.010294801 | 0.044372702 |
| ENSMUSG00000030096 | 7862.449373 | -0.592029945 | 0.140641608 | -4.209493556 | 2.56E-05    | 0.000274678 |
| ENSMUSG00000060716 | 6832.346413 | -0.591930629 | 0.108686547 | -5.44621801  | 5.15E-08    | 1.02E-06    |
| ENSMUSG00000072660 | 82.78299302 | -0.591795935 | 0.291127876 | -2.032769733 | 0.042075792 | 0.132945912 |
| ENSMUSG00000000792 | 390.7873465 | -0.591727958 | 0.194832424 | -3.037112343 | 0.002388564 | 0.013623368 |
| ENSMUSG00000086583 | 1903.510481 | -0.591483269 | 0.137356377 | -4.306194449 | 1.66E-05    | 0.000188494 |
| ENSMUSG00000026414 | 458.0679234 | -0.591345475 | 0.191225047 | -3.09240595  | 0.001985411 | 0.011716501 |
| ENSMUSG00000030935 | 1489.955182 | -0.590906406 | 0.146594928 | -4.030878925 | 5.56E-05    | 0.000549064 |
| ENSMUSG00000093445 | 66.27930276 | -0.58988591  | 0.291526766 | -2.02343654  | 0.04302816  | 0.135150845 |
| ENSMUSG00000019312 | 7815.05789  | -0.588939399 | 0.132807201 | -4.434544165 | 9.23E-06    | 0.000110686 |
| ENSMUSG00000041842 | 2846.457969 | -0.588903297 | 0.139321582 | -4.226935193 | 2.37E-05    | 0.000256582 |
| ENSMUSG00000108207 | 122.2934922 | -0.588586216 | 0.262673421 | -2.240752847 | 0.025042089 | 0.089140243 |
| ENSMUSG00000029438 | 3528.651228 | -0.587674286 | 0.118729072 | -4.949708399 | 7.43E-07    | 1.15E-05    |
| ENSMUSG00000032121 | 323.1363428 | -0.586275673 | 0.173225939 | -3.384456597 | 0.000713193 | 0.004995262 |

|                    |             |              |             |              |             |             |
|--------------------|-------------|--------------|-------------|--------------|-------------|-------------|
| ENSMUSG00000047003 | 591.0359688 | -0.586267337 | 0.141417828 | -4.145639532 | 3.39E-05    | 0.000353299 |
| ENSMUSG00000024743 | 252.7042434 | -0.586002777 | 0.274698167 | -2.133260597 | 0.032903355 | 0.110276181 |
| ENSMUSG00000027864 | 6593.44833  | -0.585725649 | 0.118678212 | -4.935410108 | 8.00E-07    | 1.23E-05    |
| ENSMUSG00000046447 | 2100.653128 | -0.585407498 | 0.114357177 | -5.119114632 | 3.07E-07    | 5.19E-06    |
| ENSMUSG00000050050 | 93.58070607 | -0.584925455 | 0.284443908 | -2.056382434 | 0.039745668 | 0.127443299 |
| ENSMUSG00000053852 | 99.3696482  | -0.58459962  | 0.284238284 | -2.056723718 | 0.039712809 | 0.127392889 |
| ENSMUSG00000111920 | 178.650884  | -0.584509299 | 0.227090813 | -2.573901126 | 0.010055901 | 0.043555509 |
| ENSMUSG00000026110 | 9972.978385 | -0.583725603 | 0.129998557 | -4.490246789 | 7.11E-06    | 8.80E-05    |
| ENSMUSG00000037151 | 317.3953696 | -0.583446286 | 0.170009879 | -3.431837535 | 0.000599507 | 0.004321137 |
| ENSMUSG00000021257 | 375.96705   | -0.583439289 | 0.16889055  | -3.454540761 | 0.000551231 | 0.004019948 |
| ENSMUSG00000108624 | 146.6250531 | -0.583344485 | 0.233062314 | -2.502955004 | 0.01231612  | 0.050929315 |
| ENSMUSG00000078651 | 548.9374964 | -0.582519059 | 0.136085263 | -4.28054476  | 1.86E-05    | 0.000208302 |
| ENSMUSG00000037251 | 817.1303964 | -0.582118832 | 0.122707952 | -4.743937299 | 2.10E-06    | 2.94E-05    |
| ENSMUSG00000040618 | 5172.071912 | -0.581557911 | 0.115452436 | -5.037207783 | 4.72E-07    | 7.65E-06    |
| ENSMUSG00000022176 | 240.1526193 | -0.580161857 | 0.225790556 | -2.569469099 | 0.010185448 | 0.044003422 |
| ENSMUSG00000033740 | 294.0471238 | -0.580114679 | 0.223027375 | -2.601091817 | 0.009292758 | 0.040939904 |
| ENSMUSG00000023994 | 4294.789356 | -0.57933479  | 0.140753373 | -4.115956721 | 3.86E-05    | 0.000396438 |
| ENSMUSG00000037033 | 172758.1346 | -0.578622534 | 0.096626066 | -5.988265468 | 2.12E-09    | 5.30E-08    |
| ENSMUSG00000027329 | 748.5191616 | -0.577885003 | 0.202917743 | -2.847878138 | 0.004401177 | 0.022337428 |
| ENSMUSG00000032280 | 6858.759083 | -0.577090762 | 0.110612086 | -5.217248692 | 1.82E-07    | 3.22E-06    |
| ENSMUSG00000006641 | 1106.16211  | -0.577020792 | 0.154738617 | -3.729003166 | 0.000192239 | 0.00161839  |
| ENSMUSG00000036026 | 5289.308088 | -0.576931358 | 0.112623574 | -5.122651849 | 3.01E-07    | 5.09E-06    |
| ENSMUSG00000039754 | 511.4919927 | -0.576698258 | 0.156084264 | -3.694787943 | 0.00022007  | 0.001823779 |
| ENSMUSG00000038712 | 2308.186993 | -0.576156495 | 0.121487471 | -4.742517798 | 2.11E-06    | 2.96E-05    |
| ENSMUSG00000046879 | 1936.005673 | -0.576142933 | 0.152057946 | -3.78896958  | 0.000151273 | 0.001310116 |
| ENSMUSG00000040734 | 816.6179063 | -0.575134729 | 0.139539644 | -4.121658284 | 3.76E-05    | 0.000388363 |
| ENSMUSG00000036745 | 218.1788452 | -0.574363754 | 0.208933989 | -2.74902019  | 0.00597737  | 0.028636163 |
| ENSMUSG00000069833 | 4520.843338 | -0.574019787 | 0.183650268 | -3.125613654 | 0.001774345 | 0.010650163 |
| ENSMUSG00000104316 | 322.481412  | -0.573986613 | 0.170014781 | -3.376098291 | 0.000735216 | 0.00512377  |

|                    |             |              |              |              |             |             |
|--------------------|-------------|--------------|--------------|--------------|-------------|-------------|
| ENSMUSG00000041515 | 5413.235724 | -0.573681498 | 0.150846381  | -3.803084254 | 0.000142906 | 0.001248312 |
| ENSMUSG00000073771 | 1242.55802  | -0.573440609 | 0.172452278  | -3.325213302 | 0.000883509 | 0.006007054 |
| ENSMUSG00000028337 | 4439.039453 | -0.573081115 | 0.1144447814 | -5.007357443 | 5.52E-07    | 8.75E-06    |
| ENSMUSG00000003934 | 154.4679411 | -0.572978684 | 0.228629862  | -2.506141059 | 0.012205692 | 0.050613449 |
| ENSMUSG00000034957 | 7807.735454 | -0.572692488 | 0.091600128  | -6.252092675 | 4.05E-10    | 1.12E-08    |
| ENSMUSG00000058603 | 418.5968206 | -0.572473301 | 0.156420758  | -3.659829472 | 0.000252383 | 0.002045946 |
| ENSMUSG00000104114 | 215.4266824 | -0.572176981 | 0.201012471  | -2.846475045 | 0.004420619 | 0.022405507 |
| ENSMUSG00000014837 | 621.0342405 | -0.572085005 | 0.158429825  | -3.610967861 | 0.000305056 | 0.002423607 |
| ENSMUSG00000047875 | 261.9118065 | -0.571495232 | 0.204391637  | -2.796079331 | 0.00517267  | 0.02553736  |
| ENSMUSG00000105881 | 398.9921166 | -0.570968589 | 0.242353861  | -2.355929411 | 0.018476428 | 0.070039577 |
| ENSMUSG00000042834 | 109.9200659 | -0.570736005 | 0.236621222  | -2.412023736 | 0.015864249 | 0.06218819  |
| ENSMUSG00000055612 | 22046.59476 | -0.569699719 | 0.136722347  | -4.166836895 | 3.09E-05    | 0.00032551  |
| ENSMUSG00000025757 | 3344.180303 | -0.569110301 | 0.207190273  | -2.746800286 | 0.006017977 | 0.028793585 |
| ENSMUSG00000107335 | 615.3916349 | -0.568886116 | 0.188084462  | -3.02463112  | 0.002489365 | 0.014108091 |
| ENSMUSG00000051351 | 1254.438357 | -0.568866771 | 0.124992426  | -4.551209923 | 5.33E-06    | 6.82E-05    |
| ENSMUSG00000032640 | 499.7884958 | -0.568831107 | 0.154235096  | -3.688078268 | 0.000225954 | 0.001864916 |
| ENSMUSG00000032375 | 100.6377688 | -0.568577231 | 0.248717944  | -2.286032209 | 0.022252374 | 0.081152935 |
| ENSMUSG00000018543 | 100.1907033 | -0.568450678 | 0.251059511  | -2.264206899 | 0.023561392 | 0.084926881 |
| ENSMUSG00000028414 | 1483.950077 | -0.568368974 | 0.161361766  | -3.522327425 | 0.000427775 | 0.003245941 |
| ENSMUSG00000035595 | 661.7243907 | -0.568289894 | 0.190142428  | -2.988759012 | 0.00280113  | 0.015562529 |
| ENSMUSG00000037580 | 934.6665253 | -0.567924893 | 0.213460882  | -2.660557234 | 0.007801147 | 0.035642978 |
| ENSMUSG00000102380 | 457.116183  | -0.567559318 | 0.170404166  | -3.330665737 | 0.000866386 | 0.005910452 |
| ENSMUSG00000076431 | 15535.50134 | -0.566785108 | 0.099375471  | -5.703470886 | 1.17E-08    | 2.58E-07    |
| ENSMUSG00000048371 | 2012.385952 | -0.565115565 | 0.124076619  | -4.554569329 | 5.25E-06    | 6.74E-05    |
| ENSMUSG00000030541 | 8903.127442 | -0.564817415 | 0.102412825  | -5.515104356 | 3.49E-08    | 7.03E-07    |
| ENSMUSG00000039065 | 1037.210359 | -0.562715794 | 0.15525584   | -3.624442046 | 0.000289586 | 0.002315545 |
| ENSMUSG00000024913 | 10052.4119  | -0.562673163 | 0.10367152   | -5.427461321 | 5.72E-08    | 1.12E-06    |
| ENSMUSG00000056687 | 157.0732327 | -0.562392254 | 0.208732387  | -2.694321956 | 0.0070532   | 0.032824167 |
| ENSMUSG00000031838 | 5872.61439  | -0.562091319 | 0.123554509  | -4.549338769 | 5.38E-06    | 6.87E-05    |

|                    |             |              |             |              |             |             |
|--------------------|-------------|--------------|-------------|--------------|-------------|-------------|
| ENSMUSG00000022773 | 196.858455  | -0.562089233 | 0.217422861 | -2.585235199 | 0.009731259 | 0.042469042 |
| ENSMUSG00000031853 | 14069.39708 | -0.561918192 | 0.110070292 | -5.105084971 | 3.31E-07    | 5.54E-06    |
| ENSMUSG00000037337 | 202.2230326 | -0.561361357 | 0.205248483 | -2.73503292  | 0.006237404 | 0.029671575 |
| ENSMUSG00000023931 | 125.4343348 | -0.560828975 | 0.244527205 | -2.293523846 | 0.021817864 | 0.079881824 |
| ENSMUSG00000029587 | 888.1740983 | -0.560566916 | 0.147559114 | -3.798931157 | 0.000145321 | 0.001265448 |
| ENSMUSG00000031755 | 589.0057248 | -0.559520686 | 0.141463984 | -3.95521651  | 7.65E-05    | 0.000726877 |
| ENSMUSG00000046618 | 130.1765332 | -0.559310533 | 0.249069471 | -2.245600513 | 0.024729608 | 0.088295706 |
| ENSMUSG00000046179 | 3808.930142 | -0.559273568 | 0.15730789  | -3.555279822 | 0.000377577 | 0.002915632 |
| ENSMUSG00000001761 | 4054.490866 | -0.558576315 | 0.124536198 | -4.485252655 | 7.28E-06    | 8.98E-05    |
| ENSMUSG00000027254 | 263.2656592 | -0.558189935 | 0.188958779 | -2.954030175 | 0.003136533 | 0.017023079 |
| ENSMUSG00000032359 | 2877.641967 | -0.55689098  | 0.125921726 | -4.422517042 | 9.76E-06    | 0.000116406 |
| ENSMUSG00000026955 | 1897.865212 | -0.556767754 | 0.106506168 | -5.227563474 | 1.72E-07    | 3.08E-06    |
| ENSMUSG00000048856 | 932.76246   | -0.554542205 | 0.14165255  | -3.914805679 | 9.05E-05    | 0.00084002  |
| ENSMUSG00000028024 | 2022.330048 | -0.554396831 | 0.162048368 | -3.421181209 | 0.000623498 | 0.004462415 |
| ENSMUSG00000066877 | 4541.096563 | -0.552960026 | 0.09708573  | -5.695585002 | 1.23E-08    | 2.69E-07    |
| ENSMUSG00000020212 | 849.8583563 | -0.552935205 | 0.13824617  | -3.999642129 | 6.34E-05    | 0.000618871 |
| ENSMUSG00000019832 | 364.5567763 | -0.551767213 | 0.175094987 | -3.151245062 | 0.00162576  | 0.009933172 |
| ENSMUSG00000097566 | 151.037128  | -0.55096264  | 0.226452772 | -2.433013455 | 0.014973744 | 0.059492157 |
| ENSMUSG00000099098 | 234.945872  | -0.550839778 | 0.217975408 | -2.527073046 | 0.011501758 | 0.048341632 |
| ENSMUSG00000038855 | 827.6405721 | -0.550620158 | 0.171521992 | -3.210201506 | 0.00132642  | 0.008374831 |
| ENSMUSG00000103940 | 78.80290713 | -0.550521572 | 0.276349603 | -1.992120002 | 0.046357893 | 0.142991337 |
| ENSMUSG00000014232 | 715.5029217 | -0.550235782 | 0.144515107 | -3.807462029 | 0.0001404   | 0.001230765 |
| ENSMUSG00000045319 | 1161.108411 | -0.550025655 | 0.124663136 | -4.412095452 | 1.02E-05    | 0.000121375 |
| ENSMUSG00000025537 | 348.5036094 | -0.549793588 | 0.206588172 | -2.661302354 | 0.007783902 | 0.035577242 |
| ENSMUSG00000039952 | 13276.62406 | -0.549682855 | 0.121957674 | -4.507160857 | 6.57E-06    | 8.21E-05    |
| ENSMUSG00000035274 | 524.6308996 | -0.548535585 | 0.162156668 | -3.382750727 | 0.000717637 | 0.005020085 |
| ENSMUSG00000017009 | 16780.04341 | -0.548339832 | 0.110913675 | -4.943843321 | 7.66E-07    | 1.19E-05    |
| ENSMUSG00000036492 | 180.5291937 | -0.547740771 | 0.272353759 | -2.011137177 | 0.044310969 | 0.138226175 |
| ENSMUSG00000002910 | 2177.923662 | -0.547626987 | 0.174017442 | -3.146966089 | 0.001649741 | 0.010049405 |

|                    |             |              |             |              |             |             |
|--------------------|-------------|--------------|-------------|--------------|-------------|-------------|
| ENSMUSG00000055313 | 155.1272641 | -0.546942969 | 0.25877641  | -2.113573525 | 0.034551709 | 0.114357029 |
| ENSMUSG00000000959 | 3833.815622 | -0.54686039  | 0.130165926 | -4.201256093 | 2.65E-05    | 0.000283774 |
| ENSMUSG00000025464 | 1400.150015 | -0.546235016 | 0.112970599 | -4.835196237 | 1.33E-06    | 1.95E-05    |
| ENSMUSG00000029482 | 2529.766416 | -0.546191103 | 0.106982925 | -5.105404478 | 3.30E-07    | 5.54E-06    |
| ENSMUSG00000107881 | 750.441175  | -0.545987545 | 0.205626835 | -2.655234877 | 0.00792532  | 0.03604881  |
| ENSMUSG00000062312 | 10531.08951 | -0.545669317 | 0.117274725 | -4.652914929 | 3.27E-06    | 4.39E-05    |
| ENSMUSG00000072066 | 159.9001089 | -0.545523618 | 0.256676441 | -2.12533576  | 0.033558606 | 0.111833605 |
| ENSMUSG00000043592 | 3493.166995 | -0.545426785 | 0.10033522  | -5.436045159 | 5.45E-08    | 1.07E-06    |
| ENSMUSG00000001507 | 5572.364982 | -0.545240468 | 0.112467036 | -4.848002473 | 1.25E-06    | 1.84E-05    |
| ENSMUSG00000003863 | 206.7425176 | -0.544667413 | 0.22846883  | -2.383990033 | 0.017126066 | 0.065986248 |
| ENSMUSG00000024381 | 709.4033256 | -0.5445703   | 0.176613845 | -3.083395313 | 0.002046531 | 0.01199151  |
| ENSMUSG00000085762 | 242.5525858 | -0.544285647 | 0.188996915 | -2.879865239 | 0.003978452 | 0.020556871 |
| ENSMUSG00000049225 | 352.8960363 | -0.544122591 | 0.162895482 | -3.340317267 | 0.000836827 | 0.00572808  |
| ENSMUSG00000020736 | 4860.974031 | -0.543982512 | 0.114353116 | -4.757041447 | 1.96E-06    | 2.78E-05    |
| ENSMUSG00000068876 | 11409.45744 | -0.54380277  | 0.126188004 | -4.309464876 | 1.64E-05    | 0.000186392 |
| ENSMUSG00000047040 | 5565.488106 | -0.543262252 | 0.129147049 | -4.206540202 | 2.59E-05    | 0.000277756 |
| ENSMUSG00000027544 | 768.3208258 | -0.542603362 | 0.123853597 | -4.381006079 | 1.18E-05    | 0.000138365 |
| ENSMUSG00000074500 | 146.5236605 | -0.5424343   | 0.211770886 | -2.561420554 | 0.010424508 | 0.044784618 |
| ENSMUSG00000006800 | 474.7893645 | -0.542252305 | 0.212965358 | -2.546199583 | 0.01089029  | 0.04641016  |
| ENSMUSG00000021266 | 5582.320515 | -0.541877625 | 0.107658181 | -5.033315796 | 4.82E-07    | 7.78E-06    |
| ENSMUSG00000032648 | 435.2969578 | -0.541684355 | 0.204820271 | -2.644681375 | 0.008176787 | 0.037017972 |
| ENSMUSG00000024511 | 1099.072751 | -0.541682528 | 0.168677288 | -3.211354266 | 0.00132111  | 0.008346194 |
| ENSMUSG00000023031 | 176.5078857 | -0.541065001 | 0.244856492 | -2.209722914 | 0.027124398 | 0.0948975   |
| ENSMUSG00000053746 | 407.834184  | -0.54083652  | 0.201756738 | -2.680636717 | 0.007348224 | 0.033945546 |
| ENSMUSG00000068732 | 1181.032985 | -0.540554197 | 0.146152145 | -3.69857177  | 0.000216816 | 0.001801496 |
| ENSMUSG00000001918 | 10524.86132 | -0.540511755 | 0.108099086 | -5.000151025 | 5.73E-07    | 9.05E-06    |
| ENSMUSG00000021918 | 1568.922561 | -0.54013183  | 0.114527276 | -4.716185073 | 2.40E-06    | 3.32E-05    |
| ENSMUSG00000015542 | 839.1412335 | -0.539972136 | 0.165728376 | -3.258175515 | 0.00112131  | 0.007311796 |
| ENSMUSG00000032399 | 132709.2718 | -0.539644574 | 0.104296213 | -5.174153092 | 2.29E-07    | 3.98E-06    |

|                    |             |              |             |              |             |             |
|--------------------|-------------|--------------|-------------|--------------|-------------|-------------|
| ENSMUSG00000021565 | 461.9702562 | -0.538749094 | 0.199146542 | -2.705289724 | 0.006824484 | 0.03198672  |
| ENSMUSG00000036046 | 2714.274682 | -0.538597902 | 0.108928155 | -4.944524229 | 7.63E-07    | 1.18E-05    |
| ENSMUSG00000055013 | 7691.016994 | -0.538512443 | 0.100189771 | -5.374924375 | 7.66E-08    | 1.48E-06    |
| ENSMUSG00000055053 | 4254.723589 | -0.538472631 | 0.118151306 | -4.55748352  | 5.18E-06    | 6.67E-05    |
| ENSMUSG00000037279 | 679.4795167 | -0.538409581 | 0.175422108 | -3.069223064 | 0.002146163 | 0.012470447 |
| ENSMUSG00000020091 | 11794.44069 | -0.537116528 | 0.148535225 | -3.616088564 | 0.000299088 | 0.002383833 |
| ENSMUSG00000059456 | 2906.341767 | -0.536890192 | 0.128991121 | -4.162225959 | 3.15E-05    | 0.000331215 |
| ENSMUSG00000034617 | 1102.404219 | -0.536505005 | 0.144259979 | -3.719014861 | 0.000200001 | 0.001678039 |
| ENSMUSG00000032091 | 10065.80367 | -0.536177608 | 0.095427675 | -5.618680432 | 1.92E-08    | 4.08E-07    |
| ENSMUSG00000038267 | 2480.833863 | -0.536026907 | 0.12500544  | -4.28802865  | 1.80E-05    | 0.000202831 |
| ENSMUSG00000048027 | 13533.66602 | -0.535765315 | 0.143897302 | -3.723247824 | 0.000196676 | 0.001652007 |
| ENSMUSG00000050288 | 1316.502265 | -0.535741861 | 0.119022475 | -4.50118231  | 6.76E-06    | 8.41E-05    |
| ENSMUSG00000037012 | 288.3164633 | -0.534749368 | 0.188422669 | -2.838030964 | 0.004539278 | 0.022907996 |
| ENSMUSG00000037103 | 2483.721401 | -0.534296816 | 0.102921718 | -5.191293197 | 2.09E-07    | 3.66E-06    |
| ENSMUSG00000045136 | 3834.153439 | -0.534072373 | 0.137292016 | -3.89004683  | 0.000100225 | 0.000919044 |
| ENSMUSG00000043099 | 118.4568844 | -0.533901843 | 0.265158213 | -2.013521806 | 0.044059763 | 0.137596525 |
| ENSMUSG00000032254 | 7233.584889 | -0.533477024 | 0.143778317 | -3.710413601 | 0.000206921 | 0.001727646 |
| ENSMUSG00000034107 | 1383.305808 | -0.532647269 | 0.18227559  | -2.922208439 | 0.003475589 | 0.01846174  |
| ENSMUSG00000055134 | 680.108528  | -0.532086125 | 0.178453183 | -2.981656671 | 0.002866933 | 0.015846518 |
| ENSMUSG00000111877 | 169.4474363 | -0.531639283 | 0.221110282 | -2.40440779  | 0.016198692 | 0.063166119 |
| ENSMUSG00000058799 | 8892.571964 | -0.531022009 | 0.143221431 | -3.707699361 | 0.000209151 | 0.001743653 |
| ENSMUSG00000032035 | 239.9940374 | -0.530970756 | 0.252159216 | -2.105696412 | 0.035230732 | 0.116001853 |
| ENSMUSG00000063458 | 148.931972  | -0.530048061 | 0.239747576 | -2.210858892 | 0.02704561  | 0.094760878 |
| ENSMUSG00000007659 | 1360.285164 | -0.529022949 | 0.143106648 | -3.696704213 | 0.000218417 | 0.001813443 |
| ENSMUSG00000045817 | 29330.95887 | -0.528418294 | 0.1053963   | -5.013632309 | 5.34E-07    | 8.50E-06    |
| ENSMUSG00000056413 | 1321.424486 | -0.527902686 | 0.146587854 | -3.601271673 | 0.000316664 | 0.002498031 |
| ENSMUSG00000052512 | 14878.56295 | -0.526995776 | 0.13418467  | -3.927391823 | 8.59E-05    | 0.000805312 |
| ENSMUSG00000026709 | 2518.420541 | -0.526721274 | 0.143476959 | -3.671120983 | 0.000241489 | 0.001972691 |
| ENSMUSG00000110702 | 130.5006246 | -0.526676665 | 0.251212664 | -2.096537081 | 0.036034574 | 0.118247063 |

|                    |             |              |              |              |             |             |
|--------------------|-------------|--------------|--------------|--------------|-------------|-------------|
| ENSMUSG00000084349 | 1299.698709 | -0.526290955 | 0.124165594  | -4.238621497 | 2.25E-05    | 0.000244893 |
| ENSMUSG00000105071 | 244.3672061 | -0.526206387 | 0.186473114  | -2.821888782 | 0.004774173 | 0.023904094 |
| ENSMUSG00000023110 | 4813.387464 | -0.526151879 | 0.108594472  | -4.845107392 | 1.27E-06    | 1.86E-05    |
| ENSMUSG00000037007 | 1169.371092 | -0.526101719 | 0.118317117  | -4.446539376 | 8.73E-06    | 0.000105256 |
| ENSMUSG00000034994 | 231510.7366 | -0.525096189 | 0.115424144  | -4.549275136 | 5.38E-06    | 6.87E-05    |
| ENSMUSG00000036813 | 3303.462479 | -0.524850365 | 0.161479516  | -3.250259705 | 0.001152997 | 0.007479051 |
| ENSMUSG00000009566 | 1861.573069 | -0.524665219 | 0.131956887  | -3.97603514  | 7.01E-05    | 0.000674748 |
| ENSMUSG00000021451 | 2102.54211  | -0.524622259 | 0.1111773514 | -4.693618734 | 2.68E-06    | 3.68E-05    |
| ENSMUSG00000036557 | 122.5179334 | -0.524112509 | 0.241837363  | -2.167210648 | 0.030218796 | 0.102829211 |
| ENSMUSG00000039199 | 1050.820536 | -0.523180718 | 0.129654643  | -4.035186896 | 5.46E-05    | 0.0005401   |
| ENSMUSG00000023088 | 2681.674394 | -0.522679441 | 0.122787345  | -4.256785913 | 2.07E-05    | 0.000228618 |
| ENSMUSG00000032358 | 2868.080051 | -0.522004672 | 0.122236028  | -4.270464939 | 1.95E-05    | 0.000216534 |
| ENSMUSG00000047434 | 1805.59246  | -0.521039323 | 0.120747269  | -4.315123057 | 1.60E-05    | 0.000182333 |
| ENSMUSG00000021990 | 7754.566629 | -0.519265242 | 0.094782427  | -5.478496982 | 4.29E-08    | 8.56E-07    |
| ENSMUSG00000030094 | 2214.113283 | -0.518421163 | 0.114310877  | -4.535186665 | 5.76E-06    | 7.30E-05    |
| ENSMUSG00000022211 | 373.8395612 | -0.518046531 | 0.194062182  | -2.669487297 | 0.007596715 | 0.034880448 |
| ENSMUSG00000031822 | 6484.441322 | -0.517617858 | 0.110746419  | -4.673901551 | 2.96E-06    | 4.00E-05    |
| ENSMUSG00000048878 | 13125.54794 | -0.517541071 | 0.12806756   | -4.041156655 | 5.32E-05    | 0.000529295 |
| ENSMUSG00000023963 | 951.6759715 | -0.51722103  | 0.13889967   | -3.723702362 | 0.000196322 | 0.001649655 |
| ENSMUSG00000029710 | 19917.08255 | -0.517179585 | 0.107655737  | -4.804013226 | 1.56E-06    | 2.25E-05    |
| ENSMUSG00000034800 | 335.7051686 | -0.516605405 | 0.166326525  | -3.105971255 | 0.001896552 | 0.01126965  |
| ENSMUSG00000031903 | 331.1360673 | -0.51654271  | 0.169989602  | -3.038672397 | 0.002376231 | 0.013566904 |
| ENSMUSG00000024114 | 191.7146768 | -0.516417644 | 0.211851973  | -2.437634334 | 0.01478372  | 0.058935339 |
| ENSMUSG00000035413 | 2975.451108 | -0.516158185 | 0.117295093  | -4.400509636 | 1.08E-05    | 0.000127498 |
| ENSMUSG00000027296 | 1401.563418 | -0.515280414 | 0.108175651  | -4.76336783  | 1.90E-06    | 2.70E-05    |
| ENSMUSG00000063328 | 158.8269151 | -0.515142712 | 0.230853704  | -2.231468253 | 0.025650128 | 0.090813536 |
| ENSMUSG00000024731 | 1097.627562 | -0.514289948 | 0.177915669  | -2.890638859 | 0.003844596 | 0.019990288 |
| ENSMUSG00000025366 | 3765.458634 | -0.513694945 | 0.160725714  | -3.196096831 | 0.001393004 | 0.008718881 |
| ENSMUSG00000038503 | 1559.987467 | -0.513505327 | 0.12687191   | -4.047431209 | 5.18E-05    | 0.000517387 |



|                    |             |              |             |              |             |             |
|--------------------|-------------|--------------|-------------|--------------|-------------|-------------|
| ENSMUSG00000071419 | 166.4527322 | -0.513288826 | 0.228646476 | -2.244901538 | 0.024774454 | 0.088427513 |
| ENSMUSG00000026655 | 4539.883535 | -0.512071458 | 0.135351368 | -3.783275086 | 0.000154778 | 0.001335284 |
| ENSMUSG00000073485 | 617.1386399 | -0.511852392 | 0.201501507 | -2.54019138  | 0.011079183 | 0.046999591 |
| ENSMUSG00000061894 | 783.7505867 | -0.51163671  | 0.139304924 | -3.67278267  | 0.000239924 | 0.00196134  |
| ENSMUSG00000089876 | 992.0263515 | -0.511150681 | 0.141340516 | -3.616448386 | 0.000298673 | 0.002381374 |
| ENSMUSG00000094651 | 306.1639241 | -0.510932024 | 0.253322203 | -2.016925556 | 0.043703283 | 0.136774558 |
| ENSMUSG00000000303 | 61213.64831 | -0.510894187 | 0.101672042 | -5.024923049 | 5.04E-07    | 8.08E-06    |
| ENSMUSG00000027654 | 2011.678093 | -0.510857658 | 0.107167094 | -4.766926489 | 1.87E-06    | 2.66E-05    |
| ENSMUSG00000024785 | 3188.527927 | -0.510524805 | 0.107195041 | -4.762578567 | 1.91E-06    | 2.71E-05    |
| ENSMUSG00000100625 | 365.74759   | -0.508837774 | 0.195314449 | -2.605223406 | 0.009181437 | 0.04060187  |
| ENSMUSG00000047388 | 2332.452587 | -0.508540561 | 0.131208613 | -3.875816901 | 0.000106268 | 0.00096803  |
| ENSMUSG00000023043 | 33815.8073  | -0.508295228 | 0.128362243 | -3.959850013 | 7.50E-05    | 0.000715806 |
| ENSMUSG00000031832 | 1267.243708 | -0.508104442 | 0.132427405 | -3.836852674 | 0.000124621 | 0.001110338 |
| ENSMUSG00000032261 | 2931.343643 | -0.507941787 | 0.131293378 | -3.868754046 | 0.000109393 | 0.000989684 |
| ENSMUSG00000037172 | 3212.518914 | -0.507842583 | 0.161452632 | -3.145458673 | 0.001658266 | 0.010090312 |
| ENSMUSG00000059970 | 1282.973199 | -0.507739289 | 0.191499569 | -2.651386066 | 0.008016215 | 0.036401877 |
| ENSMUSG00000045045 | 1428.280342 | -0.50762804  | 0.131772332 | -3.852311261 | 0.000117008 | 0.001049215 |
| ENSMUSG00000014873 | 2070.839383 | -0.507247266 | 0.114498476 | -4.430166081 | 9.42E-06    | 0.000112715 |
| ENSMUSG00000031803 | 4333.649066 | -0.506308309 | 0.09865976  | -5.131862383 | 2.87E-07    | 4.88E-06    |
| ENSMUSG00000042694 | 820.2979367 | -0.506243378 | 0.122930024 | -4.11814266  | 3.82E-05    | 0.000393423 |
| ENSMUSG00000028988 | 877.8473573 | -0.505702474 | 0.133752806 | -3.780873766 | 0.000156279 | 0.001346668 |
| ENSMUSG00000034118 | 114.7140277 | -0.505700339 | 0.238922368 | -2.11658851  | 0.034294786 | 0.113709192 |
| ENSMUSG00000036339 | 1657.962528 | -0.505456773 | 0.126877127 | -3.983828959 | 6.78E-05    | 0.000656956 |
| ENSMUSG00000031934 | 1543.638119 | -0.505296922 | 0.121309699 | -4.165346443 | 3.11E-05    | 0.00032718  |
| ENSMUSG00000021866 | 4840.934866 | -0.504668209 | 0.139709292 | -3.612273765 | 0.000303524 | 0.00241315  |
| ENSMUSG00000030662 | 14743.97048 | -0.504546092 | 0.143660453 | -3.512073664 | 0.000444625 | 0.003352122 |
| ENSMUSG00000019518 | 3308.388469 | -0.504540173 | 0.131917932 | -3.82465194  | 0.000130957 | 0.001158917 |
| ENSMUSG00000029163 | 208.0643456 | -0.504431935 | 0.205854279 | -2.450432109 | 0.014268487 | 0.057374959 |
| ENSMUSG00000035064 | 3388.82435  | -0.504213631 | 0.119768512 | -4.209901439 | 2.55E-05    | 0.000274446 |

|                    |             |              |             |              |             |             |
|--------------------|-------------|--------------|-------------|--------------|-------------|-------------|
| ENSMUSG00000021611 | 997.1582404 | -0.504090879 | 0.160658345 | -3.137657616 | 0.001703037 | 0.010311047 |
| ENSMUSG00000078716 | 219.5402643 | -0.503026533 | 0.256137507 | -1.963892513 | 0.049542558 | 0.150130215 |
| ENSMUSG00000025372 | 1816.999575 | -0.502863071 | 0.167500442 | -3.00215967  | 0.002680715 | 0.015024537 |
| ENSMUSG00000039715 | 781.8949673 | -0.501588589 | 0.139800277 | -3.587894091 | 0.000333336 | 0.002614933 |
| ENSMUSG00000033170 | 5806.992906 | -0.501356581 | 0.104665674 | -4.790076449 | 1.67E-06    | 2.40E-05    |
| ENSMUSG00000031221 | 4057.983428 | -0.500887901 | 0.128343763 | -3.90270543  | 9.51E-05    | 0.000879133 |
| ENSMUSG00000054400 | 206.6126905 | -0.500429029 | 0.20961332  | -2.387391356 | 0.016968417 | 0.065457996 |
| ENSMUSG00000009112 | 2678.866014 | -0.500427961 | 0.132333252 | -3.781573807 | 0.00015584  | 0.001343405 |
| ENSMUSG00000025558 | 5800.903609 | -0.50011985  | 0.139181481 | -3.593293054 | 0.000326525 | 0.002569454 |
| ENSMUSG00000042700 | 17933.36649 | -0.499630368 | 0.113048474 | -4.419611791 | 9.89E-06    | 0.000117919 |
| ENSMUSG00000090394 | 899.5329164 | -0.498613544 | 0.136521564 | -3.652269496 | 0.000259933 | 0.002099516 |
| ENSMUSG00000027845 | 551.6419914 | -0.497855755 | 0.164087829 | -3.034080954 | 0.002412697 | 0.013732912 |
| ENSMUSG00000018821 | 1164.054844 | -0.497825042 | 0.141654288 | -3.514366198 | 0.000440805 | 0.003334363 |
| ENSMUSG00000031533 | 2025.606786 | -0.497244269 | 0.139593489 | -3.562087827 | 0.000367917 | 0.002851902 |
| ENSMUSG00000057342 | 4162.120128 | -0.497080287 | 0.154362655 | -3.220210797 | 0.001280964 | 0.008134046 |
| ENSMUSG00000026958 | 780.5701812 | -0.496690904 | 0.131079989 | -3.789219901 | 0.000151121 | 0.001309305 |
| ENSMUSG00000070639 | 3463.70719  | -0.496065912 | 0.14068811  | -3.525997421 | 0.000421891 | 0.003206746 |
| ENSMUSG00000008435 | 1952.980661 | -0.495620528 | 0.116464828 | -4.255538242 | 2.09E-05    | 0.000229669 |
| ENSMUSG00000110276 | 160.4021582 | -0.494425388 | 0.23632399  | -2.092150648 | 0.036425042 | 0.119265138 |
| ENSMUSG00000040631 | 1426.247391 | -0.494236673 | 0.123387073 | -4.005579041 | 6.19E-05    | 0.000605383 |
| ENSMUSG00000032741 | 1898.228886 | -0.494064206 | 0.113966413 | -4.335173777 | 1.46E-05    | 0.000167944 |
| ENSMUSG00000066315 | 254.931207  | -0.493595311 | 0.199630723 | -2.472541819 | 0.013415602 | 0.054495689 |
| ENSMUSG00000052557 | 3442.096988 | -0.493088404 | 0.121422023 | -4.060947037 | 4.89E-05    | 0.000492295 |
| ENSMUSG00000042210 | 2074.094769 | -0.492897268 | 0.110412626 | -4.464138632 | 8.04E-06    | 9.79E-05    |
| ENSMUSG00000078866 | 445.0511418 | -0.49286772  | 0.164511192 | -2.99595252  | 0.00273589  | 0.015280012 |
| ENSMUSG00000042429 | 748.7281647 | -0.492824281 | 0.196667568 | -2.505874686 | 0.01221489  | 0.050628296 |
| ENSMUSG00000034807 | 4374.053526 | -0.492761172 | 0.101248937 | -4.866828114 | 1.13E-06    | 1.69E-05    |
| ENSMUSG00000030605 | 4499.124612 | -0.492255649 | 0.112706754 | -4.367578964 | 1.26E-05    | 0.000146456 |
| ENSMUSG00000030560 | 1613.345548 | -0.491720693 | 0.113330378 | -4.338825133 | 1.43E-05    | 0.000165349 |

|                    |             |              |             |              |             |             |
|--------------------|-------------|--------------|-------------|--------------|-------------|-------------|
| ENSMUSG00000020706 | 7994.976505 | -0.49157571  | 0.127438733 | -3.857349309 | 0.000114623 | 0.001030732 |
| ENSMUSG00000042328 | 2551.01308  | -0.491168174 | 0.148103691 | -3.316380373 | 0.000911916 | 0.006171971 |
| ENSMUSG00000044566 | 227.8323898 | -0.490362915 | 0.191683504 | -2.558190481 | 0.010521844 | 0.045133226 |
| ENSMUSG00000021277 | 2782.196125 | -0.490318781 | 0.111649231 | -4.391600143 | 1.13E-05    | 0.000132347 |
| ENSMUSG00000037572 | 3252.091289 | -0.490303085 | 0.111039431 | -4.415576362 | 1.01E-05    | 0.000119884 |
| ENSMUSG00000000149 | 1659.212513 | -0.489753877 | 0.121678569 | -4.024980563 | 5.70E-05    | 0.000561516 |
| ENSMUSG00000005699 | 193.1057253 | -0.489588303 | 0.226636023 | -2.160240442 | 0.030754061 | 0.104327094 |
| ENSMUSG00000040010 | 4045.218718 | -0.488708888 | 0.158450438 | -3.08430127  | 0.002040309 | 0.011958193 |
| ENSMUSG00000020605 | 1172.439364 | -0.488561398 | 0.111544212 | -4.379979824 | 1.19E-05    | 0.000138946 |
| ENSMUSG00000033880 | 11497.24064 | -0.488424148 | 0.097242982 | -5.022718715 | 5.09E-07    | 8.16E-06    |
| ENSMUSG00000046691 | 6673.217078 | -0.486802828 | 0.147921307 | -3.290958133 | 0.000998468 | 0.006634931 |
| ENSMUSG00000022420 | 609.2463238 | -0.486599502 | 0.169258474 | -2.874890038 | 0.004041682 | 0.020859421 |
| ENSMUSG00000048644 | 131.887826  | -0.486352794 | 0.243878202 | -1.994244629 | 0.046125327 | 0.142510518 |
| ENSMUSG00000019734 | 14943.18941 | -0.486171375 | 0.095262597 | -5.103486451 | 3.33E-07    | 5.58E-06    |
| ENSMUSG00000043572 | 616.4498355 | -0.48613048  | 0.13433076  | -3.618906643 | 0.00029585  | 0.002362248 |
| ENSMUSG00000041852 | 12934.22358 | -0.485640725 | 0.149940391 | -3.238891939 | 0.00119995  | 0.007711459 |
| ENSMUSG00000008393 | 4249.635009 | -0.485564303 | 0.106742282 | -4.548940647 | 5.39E-06    | 6.87E-05    |
| ENSMUSG00000058655 | 38243.74762 | -0.485469343 | 0.116857875 | -4.154357119 | 3.26E-05    | 0.000341373 |
| ENSMUSG00000084128 | 4913.025082 | -0.484987275 | 0.117996874 | -4.110170552 | 3.95E-05    | 0.000405569 |
| ENSMUSG00000025203 | 5439.135643 | -0.484610086 | 0.211857552 | -2.287433612 | 0.022170526 | 0.080901523 |
| ENSMUSG00000074102 | 8937.743742 | -0.483677164 | 0.12057073  | -4.011563712 | 6.03E-05    | 0.000591015 |
| ENSMUSG00000068115 | 1056.693854 | -0.482097219 | 0.142733573 | -3.377602124 | 0.000731208 | 0.005099021 |
| ENSMUSG00000039182 | 814.2422145 | -0.481917668 | 0.140578577 | -3.428101769 | 0.000607818 | 0.004368334 |
| ENSMUSG00000044641 | 2496.253614 | -0.481676701 | 0.136124753 | -3.538494575 | 0.000402416 | 0.003078652 |
| ENSMUSG00000029033 | 709.169651  | -0.481331306 | 0.150877054 | -3.190222052 | 0.001421635 | 0.008875668 |
| ENSMUSG00000114210 | 154.4599881 | -0.481260562 | 0.215230732 | -2.236021583 | 0.025350357 | 0.089993365 |
| ENSMUSG00000086992 | 157.4701067 | -0.480898137 | 0.242976202 | -1.979198511 | 0.04779366  | 0.146246765 |
| ENSMUSG00000115219 | 222.5378716 | -0.480815623 | 0.199665455 | -2.408106209 | 0.016035515 | 0.062687957 |
| ENSMUSG00000025076 | 4755.811746 | -0.480421474 | 0.108627179 | -4.422663617 | 9.75E-06    | 0.00011639  |

|                    |             |              |             |              |             |             |
|--------------------|-------------|--------------|-------------|--------------|-------------|-------------|
| ENSMUSG00000026749 | 5360.077212 | -0.480231935 | 0.12312405  | -3.900390983 | 9.60E-05    | 0.000885745 |
| ENSMUSG00000037216 | 344.4935216 | -0.47990054  | 0.198463987 | -2.418073663 | 0.015602918 | 0.061397061 |
| ENSMUSG00000112489 | 297.825837  | -0.478804839 | 0.196436774 | -2.437450123 | 0.014791255 | 0.058935339 |
| ENSMUSG00000039481 | 1212.73586  | -0.478268638 | 0.129991316 | -3.67923529  | 0.000233934 | 0.001919415 |
| ENSMUSG00000041849 | 635.1707411 | -0.478266027 | 0.144616404 | -3.307135386 | 0.000942553 | 0.006328735 |
| ENSMUSG00000020741 | 41955.58557 | -0.47773845  | 0.092729917 | -5.1519344   | 2.58E-07    | 4.43E-06    |
| ENSMUSG00000015474 | 645.4082695 | -0.477543524 | 0.149713151 | -3.189723294 | 0.001424091 | 0.008883538 |
| ENSMUSG00000049922 | 3831.188667 | -0.477492158 | 0.112914867 | -4.228780235 | 2.35E-05    | 0.000254982 |
| ENSMUSG00000091549 | 489.6955175 | -0.476818155 | 0.207856987 | -2.29397222  | 0.021792094 | 0.079818493 |
| ENSMUSG00000087230 | 323.7216834 | -0.476654948 | 0.211558508 | -2.253064428 | 0.024255087 | 0.086865697 |
| ENSMUSG00000029499 | 300.1650186 | -0.476358601 | 0.175807331 | -2.709549127 | 0.006737473 | 0.03165207  |
| ENSMUSG00000097333 | 433.8705467 | -0.476112446 | 0.153765694 | -3.096350261 | 0.001959188 | 0.01158935  |
| ENSMUSG00000050730 | 2501.834153 | -0.47566697  | 0.138069994 | -3.445114717 | 0.000570817 | 0.00413977  |
| ENSMUSG00000029027 | 850.3349606 | -0.475597098 | 0.123380809 | -3.854708853 | 0.000115867 | 0.001040241 |
| ENSMUSG00000024187 | 5404.155293 | -0.474302482 | 0.114156887 | -4.154830212 | 3.26E-05    | 0.000340828 |
| ENSMUSG00000001138 | 2185.817334 | -0.474129433 | 0.10621114  | -4.464027343 | 8.04E-06    | 9.79E-05    |
| ENSMUSG00000055093 | 192.0323716 | -0.473869605 | 0.209656763 | -2.260216168 | 0.023807838 | 0.085676713 |
| ENSMUSG00000034930 | 3713.005344 | -0.473852957 | 0.12089047  | -3.919688256 | 8.87E-05    | 0.000825934 |
| ENSMUSG00000106205 | 1242.439431 | -0.473501912 | 0.210141638 | -2.253251263 | 0.024243311 | 0.086851418 |
| ENSMUSG00000019710 | 4219.739304 | -0.472851814 | 0.105720587 | -4.472655958 | 7.73E-06    | 9.48E-05    |
| ENSMUSG00000030726 | 4366.224118 | -0.472649922 | 0.136974635 | -3.450638313 | 0.000559263 | 0.004069205 |
| ENSMUSG00000049521 | 4091.998471 | -0.472417543 | 0.106537502 | -4.43428401  | 9.24E-06    | 0.00011076  |
| ENSMUSG00000039253 | 775.5421972 | -0.472294274 | 0.129857337 | -3.637024167 | 0.000275806 | 0.002214891 |
| ENSMUSG00000005198 | 23513.45951 | -0.472291169 | 0.104501589 | -4.519464001 | 6.20E-06    | 7.79E-05    |
| ENSMUSG00000020911 | 39665.8851  | -0.471915809 | 0.145479414 | -3.243866576 | 0.00117919  | 0.007608233 |
| ENSMUSG00000026172 | 1119.502643 | -0.471831362 | 0.133200439 | -3.542265813 | 0.000396705 | 0.003039138 |
| ENSMUSG00000057551 | 2254.970715 | -0.470859217 | 0.127768352 | -3.685257032 | 0.000228472 | 0.001882214 |
| ENSMUSG00000022283 | 89979.96072 | -0.470112155 | 0.14293735  | -3.288938507 | 0.00100566  | 0.006674768 |
| ENSMUSG00000006519 | 3013.346081 | -0.469430454 | 0.168230025 | -2.790408269 | 0.005264161 | 0.025886674 |

|                    |             |              |             |              |             |             |
|--------------------|-------------|--------------|-------------|--------------|-------------|-------------|
| ENSMUSG00000044465 | 4115.256789 | -0.468660667 | 0.111040761 | -4.220618295 | 2.44E-05    | 0.000262787 |
| ENSMUSG00000061898 | 880.0754217 | -0.468617003 | 0.140968769 | -3.324261148 | 0.000886531 | 0.006025765 |
| ENSMUSG00000032561 | 3542.971368 | -0.468353144 | 0.106254326 | -4.407850126 | 1.04E-05    | 0.000123646 |
| ENSMUSG00000021340 | 3744.29377  | -0.468289779 | 0.139331288 | -3.360980771 | 0.000776662 | 0.005357946 |
| ENSMUSG00000032092 | 4293.228859 | -0.468081376 | 0.13045753  | -3.587998149 | 0.000333227 | 0.002614809 |
| ENSMUSG00000109420 | 391.3074006 | -0.468046774 | 0.222500223 | -2.103578901 | 0.035415196 | 0.116488833 |
| ENSMUSG00000034854 | 624.8726277 | -0.467626429 | 0.147094458 | -3.179089384 | 0.001477385 | 0.009158675 |
| ENSMUSG00000021786 | 696.4500224 | -0.467341196 | 0.13898849  | -3.362445318 | 0.000772554 | 0.005335625 |
| ENSMUSG00000042647 | 509.266219  | -0.467224294 | 0.198821528 | -2.349968327 | 0.018775009 | 0.07091827  |
| ENSMUSG00000048012 | 375.7396206 | -0.467149198 | 0.18148688  | -2.574010847 | 0.010052712 | 0.043555509 |
| ENSMUSG00000056999 | 8283.094204 | -0.467128688 | 0.165466812 | -2.823095956 | 0.004756233 | 0.023835677 |
| ENSMUSG00000025209 | 3587.604413 | -0.466253199 | 0.112810913 | -4.133050481 | 3.58E-05    | 0.000371317 |
| ENSMUSG00000031012 | 5585.822385 | -0.466157053 | 0.111537519 | -4.179374423 | 2.92E-05    | 0.000309979 |
| ENSMUSG00000025037 | 3643.487024 | -0.466021439 | 0.180142815 | -2.586955467 | 0.009682811 | 0.042323865 |
| ENSMUSG00000071644 | 38921.25129 | -0.465457976 | 0.121762633 | -3.82266681  | 0.000132016 | 0.001165241 |
| ENSMUSG00000085442 | 235.0888698 | -0.464996607 | 0.184414291 | -2.521478155 | 0.011686293 | 0.048914419 |
| ENSMUSG00000054517 | 1627.989806 | -0.464518547 | 0.163687176 | -2.837843246 | 0.004541948 | 0.022916287 |
| ENSMUSG00000020747 | 9018.822466 | -0.464329322 | 0.107970144 | -4.300534414 | 1.70E-05    | 0.000193177 |
| ENSMUSG00000023944 | 171444.4181 | -0.464267671 | 0.103944463 | -4.466497384 | 7.95E-06    | 9.71E-05    |
| ENSMUSG00000041859 | 9226.017513 | -0.464102631 | 0.139954531 | -3.316095792 | 0.000912845 | 0.006176385 |
| ENSMUSG00000051344 | 729.413635  | -0.463346788 | 0.153160346 | -3.025239878 | 0.00248436  | 0.014086884 |
| ENSMUSG00000022443 | 128911.2617 | -0.462966748 | 0.128330977 | -3.60759933  | 0.000309043 | 0.002449173 |
| ENSMUSG00000028042 | 5314.18185  | -0.462875951 | 0.110219839 | -4.19957018  | 2.67E-05    | 0.000285622 |
| ENSMUSG00000026640 | 5634.057971 | -0.46252254  | 0.095451591 | -4.845624215 | 1.26E-06    | 1.86E-05    |
| ENSMUSG00000022031 | 3270.410061 | -0.462159076 | 0.115872372 | -3.988518285 | 6.65E-05    | 0.00064579  |
| ENSMUSG00000018377 | 3066.69563  | -0.460891152 | 0.109353716 | -4.214682108 | 2.50E-05    | 0.000269216 |
| ENSMUSG00000040596 | 2179.293865 | -0.460671679 | 0.164020793 | -2.808617555 | 0.004975471 | 0.024745314 |
| ENSMUSG00000073478 | 282.8785665 | -0.460300883 | 0.207972704 | -2.213275468 | 0.02687866  | 0.094322737 |
| ENSMUSG00000041594 | 1871.627724 | -0.459656651 | 0.10571202  | -4.348196659 | 1.37E-05    | 0.000158769 |

|                    |             |              |             |              |             |             |
|--------------------|-------------|--------------|-------------|--------------|-------------|-------------|
| ENSMUSG00000113184 | 189.6553812 | -0.459542421 | 0.216348188 | -2.124087216 | 0.033662851 | 0.112030331 |
| ENSMUSG00000031004 | 65519.93082 | -0.459538275 | 0.179895391 | -2.554474976 | 0.010634807 | 0.04551613  |
| ENSMUSG00000039157 | 6515.305279 | -0.459344083 | 0.111849904 | -4.106790139 | 4.01E-05    | 0.000410981 |
| ENSMUSG00000086682 | 179.8641876 | -0.458896202 | 0.20611285  | -2.226431794 | 0.025985273 | 0.091721679 |
| ENSMUSG00000071379 | 2215.237886 | -0.458779582 | 0.12251394  | -3.744713319 | 0.0001806   | 0.001531391 |
| ENSMUSG00000025484 | 840.1704945 | -0.45841447  | 0.224594739 | -2.041073942 | 0.041243478 | 0.131119056 |
| ENSMUSG00000026095 | 246.9241055 | -0.458341995 | 0.201909711 | -2.270034431 | 0.023205494 | 0.083860918 |
| ENSMUSG00000032518 | 75670.43507 | -0.45828036  | 0.130819124 | -3.503160283 | 0.000459773 | 0.003449997 |
| ENSMUSG00000030499 | 529.6088672 | -0.458268602 | 0.186432    | -2.458100557 | 0.013967406 | 0.056398175 |
| ENSMUSG00000011884 | 2248.13444  | -0.45654853  | 0.113035907 | -4.038969034 | 5.37E-05    | 0.000533066 |
| ENSMUSG00000038080 | 2100.550797 | -0.456346783 | 0.127969098 | -3.566070162 | 0.000362374 | 0.002815788 |
| ENSMUSG00000027424 | 1350.175705 | -0.456343276 | 0.163224378 | -2.795803437 | 0.005177088 | 0.025548624 |
| ENSMUSG00000036206 | 2442.066527 | -0.456146291 | 0.123525065 | -3.692742769 | 0.000221848 | 0.001836467 |
| ENSMUSG00000021023 | 1860.965114 | -0.456086004 | 0.12352924  | -3.692129927 | 0.000222384 | 0.001838169 |
| ENSMUSG00000026627 | 699.2760619 | -0.456057369 | 0.131775684 | -3.46086134  | 0.00053845  | 0.003937041 |
| ENSMUSG00000106928 | 204.4761909 | -0.455311767 | 0.188615407 | -2.413969116 | 0.0157798   | 0.061944256 |
| ENSMUSG00000009291 | 4373.953196 | -0.455182324 | 0.120226746 | -3.786032143 | 0.000153072 | 0.001322593 |
| ENSMUSG00000025060 | 12284.22198 | -0.454532041 | 0.112109907 | -4.054343228 | 5.03E-05    | 0.000504813 |
| ENSMUSG00000005370 | 6108.739041 | -0.454476195 | 0.139226403 | -3.264296039 | 0.001097364 | 0.007191397 |
| ENSMUSG00000052911 | 1093.946371 | -0.45437244  | 0.170627711 | -2.662946344 | 0.007745976 | 0.035456285 |
| ENSMUSG00000036817 | 4969.119437 | -0.454233284 | 0.106087432 | -4.281688011 | 1.85E-05    | 0.000207443 |
| ENSMUSG00000046562 | 2519.371354 | -0.454063786 | 0.126643251 | -3.585376901 | 0.000336592 | 0.002637503 |
| ENSMUSG00000040728 | 12209.16145 | -0.453998369 | 0.090830147 | -4.998322503 | 5.78E-07    | 9.12E-06    |
| ENSMUSG00000030602 | 4726.773767 | -0.45366834  | 0.108128669 | -4.195634195 | 2.72E-05    | 0.000290197 |
| ENSMUSG00000024151 | 4638.597558 | -0.45268141  | 0.123470855 | -3.66630173  | 0.000246084 | 0.002002048 |
| ENSMUSG00000029388 | 2861.609379 | -0.45249027  | 0.120492301 | -3.755345929 | 0.000173102 | 0.00147567  |
| ENSMUSG00000059842 | 494.7371951 | -0.451988228 | 0.150910649 | -2.995071792 | 0.002743803 | 0.015311955 |
| ENSMUSG00000039137 | 4229.641131 | -0.451604332 | 0.102352977 | -4.412224705 | 1.02E-05    | 0.000121367 |
| ENSMUSG00000042155 | 666.5110435 | -0.450901337 | 0.194946233 | -2.312952296 | 0.020725262 | 0.076687252 |

|                    |             |              |              |              |             |             |
|--------------------|-------------|--------------|--------------|--------------|-------------|-------------|
| ENSMUSG00000024026 | 6728.888422 | -0.450691418 | 0.140973458  | -3.196994837 | 0.001388674 | 0.008698375 |
| ENSMUSG00000020190 | 13794.33965 | -0.450504115 | 0.129265224  | -3.485114556 | 0.000491926 | 0.003658036 |
| ENSMUSG00000023345 | 1422.003866 | -0.450428819 | 0.1111030736 | -4.056793972 | 4.98E-05    | 0.000499998 |
| ENSMUSG00000067873 | 4308.761802 | -0.450396917 | 0.124844262  | -3.607670145 | 0.000308959 | 0.002449173 |
| ENSMUSG00000019969 | 4510.519387 | -0.450195013 | 0.095256156  | -4.726151401 | 2.29E-06    | 3.18E-05    |
| ENSMUSG00000054715 | 720.5803258 | -0.45010909  | 0.135020893  | -3.333625492 | 0.00085722  | 0.005855416 |
| ENSMUSG00000035011 | 11857.20206 | -0.450101212 | 0.095155999  | -4.730140183 | 2.24E-06    | 3.12E-05    |
| ENSMUSG00000039981 | 666.2944735 | -0.450052211 | 0.129711139  | -3.469649685 | 0.000521138 | 0.00383814  |
| ENSMUSG00000102864 | 284.2575028 | -0.449838596 | 0.205769506  | -2.186128572 | 0.0288062   | 0.099213447 |
| ENSMUSG00000029863 | 3432.630847 | -0.449149758 | 0.132234071  | -3.396626559 | 0.00068222  | 0.004814617 |
| ENSMUSG00000031931 | 1191.293877 | -0.448682118 | 0.156801825  | -2.861459788 | 0.00421695  | 0.021599036 |
| ENSMUSG00000114165 | 295.5091527 | -0.44839791  | 0.175394201  | -2.556515029 | 0.01057265  | 0.045312637 |
| ENSMUSG00000030871 | 2127.138487 | -0.448310981 | 0.109197357  | -4.105511269 | 4.03E-05    | 0.000412891 |
| ENSMUSG00000042097 | 983.8570654 | -0.448078987 | 0.146347348  | -3.061749961 | 0.002200472 | 0.012739544 |
| ENSMUSG00000108350 | 457.1066558 | -0.446984737 | 0.187971539  | -2.377938385 | 0.017409735 | 0.066836718 |
| ENSMUSG00000037419 | 1661.320799 | -0.446941878 | 0.162033939  | -2.75832261  | 0.005809883 | 0.028038563 |
| ENSMUSG00000029860 | 3900.33546  | -0.446651744 | 0.139715892  | -3.19685712  | 0.001389337 | 0.008698375 |
| ENSMUSG00000035790 | 629.9926067 | -0.445997498 | 0.125910915  | -3.542167077 | 0.000396854 | 0.003039231 |
| ENSMUSG00000040121 | 256.3432565 | -0.445780483 | 0.19645085   | -2.269170555 | 0.023257956 | 0.084009666 |
| ENSMUSG00000050335 | 526.7031343 | -0.445500094 | 0.194749622  | -2.287553057 | 0.022163562 | 0.080895189 |
| ENSMUSG00000027324 | 1028.164521 | -0.44536697  | 0.140447419  | -3.171058415 | 0.001518846 | 0.009374975 |
| ENSMUSG00000022802 | 942.9847447 | -0.445266028 | 0.149386506  | -2.980630848 | 0.002876553 | 0.015882647 |
| ENSMUSG00000048234 | 5292.047493 | -0.445085712 | 0.106507001  | -4.178933836 | 2.93E-05    | 0.000310285 |
| ENSMUSG00000058392 | 4041.925603 | -0.444998394 | 0.178027108  | -2.499610302 | 0.012432999 | 0.051282957 |
| ENSMUSG00000021376 | 724.8587338 | -0.444588986 | 0.124957279  | -3.557927872 | 0.000373792 | 0.002890128 |
| ENSMUSG00000035126 | 256.6319114 | -0.444107637 | 0.204834603  | -2.168127997 | 0.030148949 | 0.10268047  |
| ENSMUSG00000075705 | 867.9083356 | -0.44406248  | 0.170576224  | -2.60330819  | 0.009232892 | 0.040724429 |
| ENSMUSG00000032481 | 17368.55572 | -0.444029574 | 0.136910146  | -3.243218904 | 0.001181874 | 0.007622026 |
| ENSMUSG00000064254 | 483.5103095 | -0.443632284 | 0.189523223  | -2.340780609 | 0.019243471 | 0.072320299 |

|                    |             |              |             |              |             |             |
|--------------------|-------------|--------------|-------------|--------------|-------------|-------------|
| ENSMUSG00000031488 | 13750.5008  | -0.443316533 | 0.100944784 | -4.391673477 | 1.12E-05    | 0.000132347 |
| ENSMUSG00000097493 | 729.1185487 | -0.44294104  | 0.160842902 | -2.753873706 | 0.005889449 | 0.028296931 |
| ENSMUSG00000047649 | 1441.790652 | -0.442561462 | 0.140694537 | -3.145548303 | 0.001657758 | 0.010089974 |
| ENSMUSG00000028977 | 8918.507731 | -0.442537408 | 0.130876772 | -3.381328882 | 0.000721361 | 0.005039813 |
| ENSMUSG00000039164 | 704.3729421 | -0.442110776 | 0.128869809 | -3.43067767  | 0.000602076 | 0.004332651 |
| ENSMUSG00000029250 | 5629.168062 | -0.441751518 | 0.133463803 | -3.309897571 | 0.000933301 | 0.006282387 |
| ENSMUSG00000050910 | 275.0549376 | -0.441691052 | 0.163274005 | -2.705213561 | 0.006826049 | 0.031987333 |
| ENSMUSG00000022390 | 5662.706179 | -0.441410564 | 0.136566913 | -3.232192589 | 0.001228442 | 0.007858718 |
| ENSMUSG00000047766 | 720.1538472 | -0.441241777 | 0.152271768 | -2.897725446 | 0.003758795 | 0.019626524 |
| ENSMUSG00000022048 | 1528.643865 | -0.441034037 | 0.12799532  | -3.445704392 | 0.000569573 | 0.004132091 |
| ENSMUSG00000058761 | 2018.505265 | -0.440961319 | 0.136777816 | -3.223924253 | 0.001264468 | 0.00805453  |
| ENSMUSG00000035666 | 3020.811485 | -0.440750347 | 0.174007466 | -2.532939286 | 0.011311054 | 0.047782498 |
| ENSMUSG00000028334 | 4385.727095 | -0.440054189 | 0.102903136 | -4.276392402 | 1.90E-05    | 0.000211906 |
| ENSMUSG00000055305 | 406.9516321 | -0.439891962 | 0.196711123 | -2.236233284 | 0.025336494 | 0.089972795 |
| ENSMUSG00000004897 | 14630.70291 | -0.439718481 | 0.114181464 | -3.85104959  | 0.000117613 | 0.001053366 |
| ENSMUSG00000042724 | 2301.586842 | -0.4396271   | 0.108913611 | -4.036475285 | 5.43E-05    | 0.000538043 |
| ENSMUSG00000033096 | 1374.974364 | -0.43880667  | 0.120620753 | -3.637903598 | 0.000274866 | 0.002210527 |
| ENSMUSG00000031299 | 14648.77545 | -0.438795748 | 0.122418245 | -3.584398296 | 0.000337856 | 0.002645552 |
| ENSMUSG00000044968 | 1508.548658 | -0.438794371 | 0.121829277 | -3.601715297 | 0.000316124 | 0.002495974 |
| ENSMUSG00000033721 | 888.5690733 | -0.438568273 | 0.158781465 | -2.76208734  | 0.005743311 | 0.027765355 |
| ENSMUSG00000022565 | 23745.27483 | -0.438236856 | 0.113185838 | -3.871834699 | 0.000108019 | 0.000981237 |
| ENSMUSG00000056394 | 8123.952056 | -0.438099719 | 0.12384008  | -3.537624632 | 0.000403744 | 0.003086694 |
| ENSMUSG00000030319 | 627.646339  | -0.437974335 | 0.147890779 | -2.961471562 | 0.003061728 | 0.016731093 |
| ENSMUSG00000036052 | 428.7721448 | -0.43754353  | 0.139279345 | -3.141481813 | 0.001680952 | 0.010203299 |
| ENSMUSG00000017764 | 738.9285346 | -0.437281144 | 0.126818133 | -3.448096354 | 0.000564553 | 0.004102342 |
| ENSMUSG00000021245 | 1053.225085 | -0.437216868 | 0.137255044 | -3.185433877 | 0.001445371 | 0.008989284 |
| ENSMUSG00000063838 | 2898.045537 | -0.437111821 | 0.181581494 | -2.407248735 | 0.016073218 | 0.062819636 |
| ENSMUSG00000015656 | 163981.878  | -0.436623008 | 0.158512192 | -2.754507421 | 0.005878056 | 0.028263588 |
| ENSMUSG00000027253 | 15493.00106 | -0.43636824  | 0.127351812 | -3.426478448 | 0.000611462 | 0.004393112 |



|                    |             |              |             |              |             |             |
|--------------------|-------------|--------------|-------------|--------------|-------------|-------------|
| ENSMUSG00000040729 | 168.8199738 | -0.436322444 | 0.220041156 | -1.982912889 | 0.047377161 | 0.145371225 |
| ENSMUSG00000026192 | 8610.650726 | -0.436227478 | 0.118143357 | -3.692357241 | 0.000222185 | 0.001838142 |
| ENSMUSG00000003348 | 674.4479925 | -0.435833176 | 0.148604178 | -2.932846054 | 0.003358704 | 0.017992422 |
| ENSMUSG00000056493 | 5917.45367  | -0.43580501  | 0.110116668 | -3.957666166 | 7.57E-05    | 0.00072131  |
| ENSMUSG00000039328 | 502.2621548 | -0.435643928 | 0.195568429 | -2.227577988 | 0.02590867  | 0.091537961 |
| ENSMUSG00000020823 | 4074.445465 | -0.434905928 | 0.133454515 | -3.258832628 | 0.001118716 | 0.007297015 |
| ENSMUSG00000037907 | 2347.816844 | -0.434588461 | 0.116375589 | -3.734360998 | 0.000188192 | 0.001587922 |
| ENSMUSG00000068747 | 15013.04625 | -0.434514411 | 0.142153994 | -3.056645814 | 0.002238286 | 0.012924913 |
| ENSMUSG00000041757 | 25068.38026 | -0.434249734 | 0.092671495 | -4.68590405  | 2.79E-06    | 3.81E-05    |
| ENSMUSG00000017631 | 8969.036243 | -0.433662277 | 0.109257556 | -3.969174246 | 7.21E-05    | 0.000692677 |
| ENSMUSG00000069682 | 1538.786334 | -0.433118231 | 0.109644542 | -3.950203286 | 7.81E-05    | 0.000740344 |
| ENSMUSG00000048251 | 5214.202095 | -0.432737442 | 0.121523115 | -3.560947564 | 0.000369519 | 0.002862631 |
| ENSMUSG00000107476 | 421.7789929 | -0.432306044 | 0.158288594 | -2.731125686 | 0.00631184  | 0.029968136 |
| ENSMUSG00000042606 | 3099.985913 | -0.432205286 | 0.136431246 | -3.167934748 | 0.00153526  | 0.009457963 |
| ENSMUSG00000022120 | 1003.880182 | -0.43206     | 0.135549001 | -3.187481999 | 0.001435174 | 0.00893518  |
| ENSMUSG00000038175 | 517.652503  | -0.431926891 | 0.202354306 | -2.134508032 | 0.032801217 | 0.11008276  |
| ENSMUSG00000084771 | 274.2787724 | -0.430785696 | 0.170332525 | -2.529086534 | 0.011435983 | 0.048211767 |
| ENSMUSG00000074466 | 332.0632988 | -0.430780069 | 0.209731863 | -2.053956243 | 0.039979927 | 0.128010388 |
| ENSMUSG00000034863 | 1661.568578 | -0.430615532 | 0.12623327  | -3.411268138 | 0.000646615 | 0.004605607 |
| ENSMUSG00000034330 | 3020.005493 | -0.4293776   | 0.166448818 | -2.57963742  | 0.00989041  | 0.042996397 |
| ENSMUSG00000040606 | 1751.178709 | -0.428833782 | 0.148783997 | -2.882257439 | 0.00394837  | 0.020434579 |
| ENSMUSG00000052926 | 3092.569568 | -0.427933482 | 0.131162497 | -3.262620735 | 0.001103871 | 0.007223426 |
| ENSMUSG00000044768 | 1594.515598 | -0.427552144 | 0.106463739 | -4.015941477 | 5.92E-05    | 0.000580659 |
| ENSMUSG00000095649 | 110863.6434 | -0.427470128 | 0.192085879 | -2.225411516 | 0.026053625 | 0.091933844 |
| ENSMUSG00000052751 | 1119.693173 | -0.427369404 | 0.142707663 | -2.994719373 | 0.002746974 | 0.015315069 |
| ENSMUSG00000026074 | 8879.917874 | -0.426851555 | 0.109962057 | -3.881807673 | 0.000103683 | 0.000945311 |
| ENSMUSG00000071532 | 192.7216478 | -0.425262008 | 0.199844591 | -2.127963563 | 0.033340105 | 0.111255077 |
| ENSMUSG00000035847 | 942.8318051 | -0.424667612 | 0.133590419 | -3.178877761 | 0.001478464 | 0.009158675 |
| ENSMUSG00000029557 | 533.4679949 | -0.424389037 | 0.147353204 | -2.880080153 | 0.003975741 | 0.020547624 |

|                    |             |              |             |              |             |             |
|--------------------|-------------|--------------|-------------|--------------|-------------|-------------|
| ENSMUSG00000025408 | 2473.085869 | -0.424053815 | 0.194199911 | -2.183594273 | 0.028992075 | 0.099684283 |
| ENSMUSG00000021947 | 4101.427342 | -0.424029848 | 0.125774493 | -3.371350091 | 0.000748007 | 0.005201446 |
| ENSMUSG00000038034 | 2697.644973 | -0.42392914  | 0.10322168  | -4.10697771  | 4.01E-05    | 0.000410836 |
| ENSMUSG00000039725 | 803.0660404 | -0.423690775 | 0.135160919 | -3.134713628 | 0.00172022  | 0.010404832 |
| ENSMUSG00000015176 | 10142.34222 | -0.423240971 | 0.131607007 | -3.215945561 | 0.001300155 | 0.008230132 |
| ENSMUSG00000024667 | 203.2508149 | -0.422975478 | 0.194348924 | -2.176371591 | 0.029527486 | 0.101088804 |
| ENSMUSG00000078700 | 1623.735934 | -0.422769815 | 0.119340844 | -3.542540849 | 0.000396292 | 0.003037013 |
| ENSMUSG00000026930 | 418.6008656 | -0.42245545  | 0.176641843 | -2.391593314 | 0.016775419 | 0.064871779 |
| ENSMUSG00000095567 | 13252.23071 | -0.42178417  | 0.130559389 | -3.230592407 | 0.00123534  | 0.007890436 |
| ENSMUSG00000010342 | 377.0139785 | -0.421259716 | 0.166444667 | -2.530929482 | 0.011376072 | 0.048003363 |
| ENSMUSG00000041936 | 10125.01931 | -0.421252412 | 0.118338945 | -3.559710722 | 0.000371264 | 0.002873536 |
| ENSMUSG00000025912 | 626.458287  | -0.421185985 | 0.158971646 | -2.649440927 | 0.008062507 | 0.036567411 |
| ENSMUSG00000045639 | 3373.357292 | -0.421138189 | 0.13638385  | -3.087888995 | 0.002015838 | 0.011861528 |
| ENSMUSG00000028555 | 661.2759341 | -0.420649247 | 0.177145845 | -2.374592797 | 0.01756832  | 0.067291816 |
| ENSMUSG00000018398 | 2011.41216  | -0.420281324 | 0.120209039 | -3.496253922 | 0.000471839 | 0.003527486 |
| ENSMUSG00000022679 | 250.8301779 | -0.4196935   | 0.170785022 | -2.457437394 | 0.01399322  | 0.056481954 |
| ENSMUSG00000052632 | 3019.543309 | -0.419690702 | 0.121522689 | -3.453599542 | 0.000553158 | 0.004030049 |
| ENSMUSG00000020412 | 7729.282816 | -0.419659832 | 0.106478251 | -3.941272785 | 8.11E-05    | 0.000765567 |
| ENSMUSG00000037552 | 2853.661156 | -0.418592848 | 0.183349093 | -2.283037457 | 0.022428162 | 0.081687154 |
| ENSMUSG00000034949 | 543.8768177 | -0.418561844 | 0.176447077 | -2.372166492 | 0.01768412  | 0.067622353 |
| ENSMUSG00000024998 | 7485.101705 | -0.418345886 | 0.164644191 | -2.540908867 | 0.011056473 | 0.046921106 |
| ENSMUSG00000034917 | 23427.18204 | -0.418315543 | 0.097279849 | -4.300125332 | 1.71E-05    | 0.000193436 |
| ENSMUSG00000057101 | 2016.443453 | -0.418242036 | 0.112916282 | -3.704001117 | 0.000212225 | 0.001765325 |
| ENSMUSG00000006651 | 394.6612215 | -0.41752433  | 0.200843514 | -2.078853941 | 0.037630777 | 0.122048279 |
| ENSMUSG00000096188 | 7129.821899 | -0.417466284 | 0.152511767 | -2.73727261  | 0.006195093 | 0.029489173 |
| ENSMUSG00000027395 | 4987.174811 | -0.417263947 | 0.13886363  | -3.004846892 | 0.002657146 | 0.014911174 |
| ENSMUSG00000028832 | 13098.09437 | -0.417252686 | 0.091483397 | -4.560966234 | 5.09E-06    | 6.58E-05    |
| ENSMUSG00000038593 | 730.4115969 | -0.417232747 | 0.125159439 | -3.333609907 | 0.000857268 | 0.005855416 |
| ENSMUSG00000017499 | 2316.800029 | -0.417232353 | 0.112576277 | -3.706219132 | 0.000210376 | 0.00175256  |

|                    |             |              |             |              |             |             |
|--------------------|-------------|--------------|-------------|--------------|-------------|-------------|
| ENSMUSG00000054309 | 5667.330779 | -0.416811156 | 0.135413908 | -3.07805279  | 0.00208358  | 0.012173413 |
| ENSMUSG00000023830 | 8846.279476 | -0.416589398 | 0.117596152 | -3.542542756 | 0.000396289 | 0.003037013 |
| ENSMUSG00000024049 | 256.0794431 | -0.416141286 | 0.208315526 | -1.99764892  | 0.045754736 | 0.141679583 |
| ENSMUSG00000024082 | 958.7640879 | -0.415936921 | 0.119996445 | -3.466243695 | 0.000527785 | 0.00387813  |
| ENSMUSG00000056671 | 794.0926179 | -0.415809766 | 0.143953861 | -2.88849332  | 0.003870923 | 0.020103736 |
| ENSMUSG00000027508 | 1188.511451 | -0.415683152 | 0.131105313 | -3.170604926 | 0.001521219 | 0.009387023 |
| ENSMUSG00000020737 | 9568.458766 | -0.415666965 | 0.093350204 | -4.452769747 | 8.48E-06    | 0.000102686 |
| ENSMUSG00000044847 | 1045.953168 | -0.41534871  | 0.165896622 | -2.503659845 | 0.012291614 | 0.050846836 |
| ENSMUSG00000000567 | 13937.74032 | -0.415066274 | 0.104746542 | -3.962577335 | 7.41E-05    | 0.000708444 |
| ENSMUSG00000056124 | 3604.981145 | -0.414073735 | 0.128179794 | -3.230413489 | 0.001236113 | 0.007891943 |
| ENSMUSG00000096935 | 269.6322445 | -0.41374386  | 0.196243616 | -2.108317551 | 0.035003531 | 0.115428261 |
| ENSMUSG00000089809 | 777.7897722 | -0.413267726 | 0.175629502 | -2.353065529 | 0.018619353 | 0.070401862 |
| ENSMUSG00000108912 | 210.4106682 | -0.413111531 | 0.208865373 | -1.977884244 | 0.047941767 | 0.146557379 |
| ENSMUSG00000034248 | 2765.596588 | -0.413103346 | 0.121138426 | -3.410175939 | 0.00064921  | 0.004621139 |
| ENSMUSG00000026502 | 1914.281947 | -0.413010842 | 0.146661334 | -2.81608541  | 0.004861274 | 0.02426937  |
| ENSMUSG00000033871 | 4100.789621 | -0.41295064  | 0.106177836 | -3.889235791 | 0.00010056  | 0.000921741 |
| ENSMUSG00000034442 | 755.5391406 | -0.412586183 | 0.151987275 | -2.714610043 | 0.006635385 | 0.031231685 |
| ENSMUSG00000018509 | 5102.238015 | -0.412339049 | 0.119092678 | -3.462337542 | 0.000535505 | 0.003923635 |
| ENSMUSG00000023991 | 16226.66449 | -0.412122246 | 0.101578379 | -4.057184719 | 4.97E-05    | 0.000499388 |
| ENSMUSG00000052928 | 981.0390236 | -0.412015841 | 0.142296172 | -2.89548084  | 0.003785781 | 0.019734433 |
| ENSMUSG00000039810 | 2236.217849 | -0.41200358  | 0.142485645 | -2.891544474 | 0.003833533 | 0.019946716 |
| ENSMUSG00000024853 | 21607.41668 | -0.411693469 | 0.104073175 | -3.955807714 | 7.63E-05    | 0.000725391 |
| ENSMUSG00000031988 | 2488.821651 | -0.411287423 | 0.12365586  | -3.326064947 | 0.000880814 | 0.005994212 |
| ENSMUSG00000057530 | 6830.033848 | -0.411149797 | 0.135369975 | -3.037230362 | 0.002387629 | 0.013621519 |
| ENSMUSG00000030861 | 1551.839332 | -0.410993951 | 0.140262272 | -2.930181757 | 0.003387638 | 0.018112614 |
| ENSMUSG00000047409 | 1850.084733 | -0.410832196 | 0.16045892  | -2.560357481 | 0.010456454 | 0.044895915 |
| ENSMUSG00000054252 | 3811.952085 | -0.41010469  | 0.140110073 | -2.927017891 | 0.003422292 | 0.018258501 |
| ENSMUSG00000106106 | 2187.209703 | -0.410055992 | 0.172538974 | -2.376599223 | 0.017473061 | 0.067022143 |
| ENSMUSG00000113294 | 214.0252976 | -0.409918332 | 0.191157258 | -2.144403706 | 0.032000554 | 0.107801261 |

|                     |             |              |             |              |             |             |
|---------------------|-------------|--------------|-------------|--------------|-------------|-------------|
| ENSMUSG00000029106  | 9403.090321 | -0.409865498 | 0.109048171 | -3.758572886 | 0.000170885 | 0.00145956  |
| ENSMUSG00000026873  | 446.6503043 | -0.40985536  | 0.176676469 | -2.31980728  | 0.020351305 | 0.075468877 |
| ENSMUSG00000040209  | 6384.543176 | -0.409313287 | 0.14239173  | -2.874557991 | 0.004045935 | 0.020871707 |
| ENSMUSG00000004069  | 5019.24176  | -0.40913536  | 0.127451505 | -3.210125771 | 0.001326769 | 0.008374831 |
| ENSMUSG00000028463  | 3434.19919  | -0.409117251 | 0.169669739 | -2.411256441 | 0.015897666 | 0.062293319 |
| ENSMUSG00000026605  | 10678.5799  | -0.409028925 | 0.152497754 | -2.682196394 | 0.007314051 | 0.033826347 |
| ENSMUSG00000038055  | 738.2484019 | -0.408867522 | 0.131274463 | -3.114600606 | 0.001841941 | 0.010997894 |
| ENSMUSG00000027651  | 3094.986883 | -0.408779233 | 0.124782406 | -3.27593645  | 0.001053123 | 0.006950484 |
| ENSMUSG00000040658  | 582.5327547 | -0.408651286 | 0.13388861  | -3.052173648 | 0.002271906 | 0.013071667 |
| ENSMUSG00000041598  | 4100.651928 | -0.408476342 | 0.118392601 | -3.450184713 | 0.000560203 | 0.004074719 |
| ENSMUSG00000030980  | 4203.347803 | -0.408432371 | 0.136085884 | -3.001283889 | 0.002688438 | 0.015052688 |
| ENSMUSG00000027378  | 518.7118402 | -0.408366013 | 0.144899694 | -2.818266915 | 0.004828365 | 0.024148324 |
| ENSMUSG00000001783  | 8777.9946   | -0.408263147 | 0.100208993 | -4.074116856 | 4.62E-05    | 0.000468852 |
| ENSMUSG00000053173  | 403.3508515 | -0.408171372 | 0.146144506 | -2.792929976 | 0.0052233   | 0.025736811 |
| ENSMUSG000000103041 | 748.4571697 | -0.408056232 | 0.139378975 | -2.927674218 | 0.003415077 | 0.018233092 |
| ENSMUSG00000037938  | 763.1066142 | -0.407905019 | 0.146638945 | -2.781696359 | 0.005407561 | 0.026463465 |
| ENSMUSG00000021678  | 1570.79738  | -0.407886896 | 0.133454493 | -3.05637439  | 0.002240313 | 0.012929924 |
| ENSMUSG00000074282  | 221.236248  | -0.407638783 | 0.202601155 | -2.01202596  | 0.044217201 | 0.137991574 |
| ENSMUSG00000079215  | 4581.855256 | -0.407433274 | 0.136877335 | -2.976630672 | 0.002914349 | 0.016054339 |
| ENSMUSG00000058672  | 1093.625508 | -0.407235078 | 0.182363972 | -2.233089545 | 0.02554304  | 0.090520984 |
| ENSMUSG00000063952  | 8725.786615 | -0.407134056 | 0.104466325 | -3.897275558 | 9.73E-05    | 0.000896101 |
| ENSMUSG00000004558  | 867.5486921 | -0.407058734 | 0.201804501 | -2.017094432 | 0.04368566  | 0.136753775 |
| ENSMUSG00000029674  | 215.8086224 | -0.406886097 | 0.202309762 | -2.011203473 | 0.044303969 | 0.138223673 |
| ENSMUSG00000058586  | 2591.472609 | -0.406839327 | 0.11772544  | -3.45583186  | 0.000548597 | 0.004003361 |
| ENSMUSG00000027684  | 3387.322725 | -0.406658157 | 0.106362006 | -3.823340437 | 0.000131656 | 0.001162794 |
| ENSMUSG00000040648  | 7861.47331  | -0.40641807  | 0.116305579 | -3.494398748 | 0.000475131 | 0.003548524 |
| ENSMUSG00000005982  | 1600.30656  | -0.406217592 | 0.142949844 | -2.841679156 | 0.004487663 | 0.022683448 |
| ENSMUSG00000067370  | 460.2153365 | -0.406071096 | 0.179977333 | -2.256234648 | 0.02405594  | 0.086360514 |
| ENSMUSG00000009828  | 1519.81019  | -0.406007096 | 0.112508488 | -3.608679689 | 0.000307759 | 0.002441601 |

|                     |             |              |             |              |             |             |
|---------------------|-------------|--------------|-------------|--------------|-------------|-------------|
| ENSMUSG00000041491  | 1129.827909 | -0.405981995 | 0.12962932  | -3.131868594 | 0.001736976 | 0.010474929 |
| ENSMUSG00000022466  | 1409.881968 | -0.405547389 | 0.119632764 | -3.389935804 | 0.00069909  | 0.004911911 |
| ENSMUSG00000057963  | 4146.362657 | -0.405297052 | 0.124631164 | -3.251971979 | 0.001146073 | 0.007442801 |
| ENSMUSG00000026944  | 3200.567663 | -0.404461668 | 0.137305227 | -2.945712084 | 0.003222122 | 0.017386048 |
| ENSMUSG00000021038  | 2685.505399 | -0.404396869 | 0.109032818 | -3.708946313 | 0.000208124 | 0.001737037 |
| ENSMUSG00000038525  | 2966.258343 | -0.404159804 | 0.132424514 | -3.052001407 | 0.00227321  | 0.013075797 |
| ENSMUSG00000008301  | 2176.141677 | -0.404034726 | 0.129624642 | -3.11695925  | 0.001827268 | 0.010933703 |
| ENSMUSG00000021018  | 1455.400209 | -0.404030643 | 0.114085899 | -3.541459941 | 0.000397919 | 0.003046343 |
| ENSMUSG00000026447  | 6188.119912 | -0.403673206 | 0.09917437  | -4.070338    | 4.69E-05    | 0.000475225 |
| ENSMUSG00000041975  | 989.9647659 | -0.403660171 | 0.140963985 | -2.863569519 | 0.004188969 | 0.021480761 |
| ENSMUSG00000035824  | 397.3340532 | -0.403540018 | 0.165754147 | -2.434569673 | 0.014909509 | 0.059332078 |
| ENSMUSG00000019437  | 1123.619303 | -0.403308773 | 0.156515742 | -2.576793665 | 0.009972146 | 0.04328315  |
| ENSMUSG00000043501  | 30684.01554 | -0.402767334 | 0.128569021 | -3.132693486 | 0.001732102 | 0.010456852 |
| ENSMUSG00000044221  | 4799.35179  | -0.401610862 | 0.121190783 | -3.313872999 | 0.000920133 | 0.006216263 |
| ENSMUSG000000103906 | 233.3439083 | -0.401384118 | 0.180504164 | -2.223683423 | 0.026169751 | 0.092256027 |
| ENSMUSG00000033703  | 2431.350146 | -0.401356623 | 0.113787996 | -3.527231671 | 0.000419929 | 0.003192922 |
| ENSMUSG00000034773  | 996.8013477 | -0.401046078 | 0.141677086 | -2.83070531  | 0.004644549 | 0.023344172 |
| ENSMUSG00000033712  | 6135.521774 | -0.400981878 | 0.100023695 | -4.008868881 | 6.10E-05    | 0.000597274 |
| ENSMUSG00000039096  | 616.9906679 | -0.400617139 | 0.162188977 | -2.470063917 | 0.013508891 | 0.054794795 |
| ENSMUSG00000033075  | 4632.205037 | -0.399834478 | 0.148043131 | -2.700797228 | 0.00691735  | 0.032320096 |
| ENSMUSG00000027111  | 27807.25454 | -0.39968662  | 0.112425221 | -3.55513307  | 0.000377788 | 0.00291625  |
| ENSMUSG00000059689  | 828.1847122 | -0.399672726 | 0.129175608 | -3.094026277 | 0.0019746   | 0.011671231 |
| ENSMUSG00000027536  | 7892.959346 | -0.399169626 | 0.152774128 | -2.61280907  | 0.008980145 | 0.03984262  |
| ENSMUSG00000078954  | 1622.473244 | -0.397792366 | 0.110178777 | -3.610426416 | 0.000305694 | 0.002426943 |
| ENSMUSG00000021287  | 839.6728241 | -0.397725228 | 0.130060326 | -3.058005764 | 0.002228153 | 0.012873067 |
| ENSMUSG00000022177  | 2241.3207   | -0.397103383 | 0.129270808 | -3.071872054 | 0.002127209 | 0.012386132 |
| ENSMUSG00000056919  | 2717.598683 | -0.396709136 | 0.13501064  | -2.938354603 | 0.003299594 | 0.017718334 |
| ENSMUSG00000027490  | 1898.052299 | -0.396661628 | 0.121851147 | -3.255296631 | 0.00113274  | 0.007366939 |
| ENSMUSG00000049672  | 1379.453463 | -0.396262331 | 0.125863818 | -3.148341883 | 0.001641995 | 0.010013163 |

|                    |             |              |             |              |             |             |
|--------------------|-------------|--------------|-------------|--------------|-------------|-------------|
| ENSMUSG00000036875 | 4664.563231 | -0.396035056 | 0.130287057 | -3.039711425 | 0.002368049 | 0.013534051 |
| ENSMUSG00000038766 | 7544.995186 | -0.395895636 | 0.147843133 | -2.677808751 | 0.007410552 | 0.034201721 |
| ENSMUSG00000030323 | 756.866729  | -0.395273517 | 0.167474811 | -2.36019683  | 0.018265241 | 0.069368723 |
| ENSMUSG00000027810 | 4497.500101 | -0.395221343 | 0.11245229  | -3.514569096 | 0.000440468 | 0.003333179 |
| ENSMUSG00000005533 | 6930.35262  | -0.394637038 | 0.104090624 | -3.791283226 | 0.000149871 | 0.001299483 |
| ENSMUSG00000018820 | 2734.103453 | -0.394577166 | 0.109808811 | -3.593310625 | 0.000326503 | 0.002569454 |
| ENSMUSG00000049600 | 1129.018417 | -0.394564528 | 0.136328285 | -2.894223523 | 0.003800975 | 0.019795782 |
| ENSMUSG00000042506 | 8742.142784 | -0.394177238 | 0.119207017 | -3.306661365 | 0.00094415  | 0.00633438  |
| ENSMUSG00000020413 | 602.2460142 | -0.393779363 | 0.17400117  | -2.263084566 | 0.023630477 | 0.085130251 |
| ENSMUSG00000031166 | 2876.638236 | -0.393660356 | 0.124873587 | -3.15247095  | 0.001618949 | 0.00990241  |
| ENSMUSG00000028910 | 3326.05129  | -0.393620647 | 0.096226202 | -4.090576566 | 4.30E-05    | 0.000438381 |
| ENSMUSG00000057219 | 426.6242717 | -0.393582768 | 0.166157261 | -2.368736494 | 0.017848965 | 0.068147538 |
| ENSMUSG00000037503 | 5942.127903 | -0.393507841 | 0.15828778  | -2.486027919 | 0.012917783 | 0.052897444 |
| ENSMUSG00000060036 | 98746.86306 | -0.393329834 | 0.111955358 | -3.513273872 | 0.000442621 | 0.003341534 |
| ENSMUSG00000041293 | 1337.749219 | -0.392923137 | 0.128962171 | -3.046809264 | 0.002312844 | 0.013255908 |
| ENSMUSG00000026270 | 951.3538277 | -0.392819007 | 0.121284459 | -3.238823922 | 0.001200236 | 0.007711459 |
| ENSMUSG00000073016 | 814.7388853 | -0.392414225 | 0.122617827 | -3.200303203 | 0.001372831 | 0.008619229 |
| ENSMUSG00000069844 | 1608.383457 | -0.392371347 | 0.120937183 | -3.244422741 | 0.001176889 | 0.007598671 |
| ENSMUSG00000002346 | 1509.966846 | -0.392363332 | 0.151646744 | -2.587350848 | 0.009671706 | 0.042291904 |
| ENSMUSG00000078247 | 477.4326156 | -0.392333853 | 0.135431914 | -2.896908421 | 0.003768597 | 0.019662836 |
| ENSMUSG00000029007 | 988.4474659 | -0.391929409 | 0.14536323  | -2.696207353 | 0.007013399 | 0.032669055 |
| ENSMUSG00000021782 | 5914.324517 | -0.3916166   | 0.104611226 | -3.743542765 | 0.000181444 | 0.001537377 |
| ENSMUSG00000004099 | 23714.09589 | -0.391257577 | 0.141686603 | -2.761429593 | 0.005754892 | 0.027803261 |
| ENSMUSG00000036568 | 2454.068703 | -0.391020707 | 0.122646109 | -3.188203109 | 0.001431599 | 0.008920396 |
| ENSMUSG00000036606 | 17069.5952  | -0.390984806 | 0.115601181 | -3.382186956 | 0.000719112 | 0.005028822 |
| ENSMUSG00000046862 | 672.8495347 | -0.390081282 | 0.179166785 | -2.177196415 | 0.029465916 | 0.100953317 |
| ENSMUSG00000028318 | 1202.593551 | -0.389982731 | 0.145410475 | -2.681943863 | 0.007319574 | 0.033840784 |
| ENSMUSG00000037465 | 4225.53711  | -0.389877017 | 0.13104997  | -2.975025608 | 0.002929641 | 0.016119892 |
| ENSMUSG00000032604 | 10193.82244 | -0.389612352 | 0.101021462 | -3.856728501 | 0.000114915 | 0.001032519 |

|                    |             |              |             |              |             |             |
|--------------------|-------------|--------------|-------------|--------------|-------------|-------------|
| ENSMUSG00000003660 | 16334.88472 | -0.389367612 | 0.116642448 | -3.338129625 | 0.000843444 | 0.005769829 |
| ENSMUSG00000022962 | 7947.088192 | -0.389265482 | 0.124761121 | -3.12008644  | 0.00180798  | 0.01082991  |
| ENSMUSG00000033767 | 5493.425939 | -0.389265421 | 0.115822295 | -3.360866066 | 0.000776985 | 0.005357946 |
| ENSMUSG00000044626 | 786.0779226 | -0.389019071 | 0.152752968 | -2.54672022  | 0.010874058 | 0.046367564 |
| ENSMUSG00000030337 | 2074.04598  | -0.388825004 | 0.138434169 | -2.808735774 | 0.004973645 | 0.024741747 |
| ENSMUSG00000020808 | 330.6299788 | -0.388494407 | 0.183540043 | -2.116673832 | 0.034287539 | 0.113702069 |
| ENSMUSG00000029009 | 1449.000756 | -0.388461513 | 0.147089535 | -2.640986746 | 0.008266495 | 0.037333154 |
| ENSMUSG00000033126 | 395.1777678 | -0.388454448 | 0.158580313 | -2.449575682 | 0.014302465 | 0.057470139 |
| ENSMUSG00000022701 | 1870.270366 | -0.388378716 | 0.165163592 | -2.351478985 | 0.018698946 | 0.070666868 |
| ENSMUSG00000026819 | 5851.535685 | -0.388333627 | 0.133533674 | -2.908132577 | 0.003635942 | 0.019114836 |
| ENSMUSG00000011257 | 11749.6347  | -0.388007234 | 0.115234293 | -3.367116037 | 0.000759587 | 0.005265637 |
| ENSMUSG00000058301 | 14364.55846 | -0.387655169 | 0.102184479 | -3.793679555 | 0.000148431 | 0.001289005 |
| ENSMUSG00000038170 | 7901.446399 | -0.387519928 | 0.095277571 | -4.067273399 | 4.76E-05    | 0.000480861 |
| ENSMUSG00000038214 | 1914.643952 | -0.387284516 | 0.170732329 | -2.268372484 | 0.023306513 | 0.084171426 |
| ENSMUSG00000020023 | 2248.395076 | -0.387100228 | 0.125923209 | -3.074097561 | 0.002111404 | 0.012313393 |
| ENSMUSG00000039660 | 2720.324396 | -0.387070829 | 0.097256622 | -3.979891772 | 6.89E-05    | 0.000666196 |
| ENSMUSG00000084790 | 243.0250578 | -0.387035423 | 0.181290965 | -2.134885337 | 0.032770377 | 0.110012372 |
| ENSMUSG00000058013 | 5669.314892 | -0.386878453 | 0.138147372 | -2.80047638  | 0.005102724 | 0.02524309  |
| ENSMUSG00000047676 | 458.1182161 | -0.386809033 | 0.154363011 | -2.505840166 | 0.012216083 | 0.050628296 |
| ENSMUSG00000027349 | 2351.898548 | -0.386523148 | 0.116425988 | -3.319904376 | 0.000900483 | 0.006105706 |
| ENSMUSG00000014601 | 4509.013874 | -0.3862414   | 0.10902515  | -3.542681658 | 0.000396081 | 0.003037013 |
| ENSMUSG00000040877 | 352.1924151 | -0.386231295 | 0.162376651 | -2.378613509 | 0.017377886 | 0.066737425 |
| ENSMUSG00000033233 | 421.9839998 | -0.386153295 | 0.151886341 | -2.542383284 | 0.011009937 | 0.046782919 |
| ENSMUSG00000022414 | 2415.626975 | -0.385445786 | 0.102667645 | -3.754306289 | 0.000173822 | 0.001481242 |
| ENSMUSG00000028807 | 743.7306413 | -0.385211884 | 0.131715618 | -2.924572572 | 0.003449296 | 0.018358654 |
| ENSMUSG00000016510 | 1297.831682 | -0.384955009 | 0.124487776 | -3.092311716 | 0.001986042 | 0.011717121 |
| ENSMUSG00000062353 | 580.6003409 | -0.384922375 | 0.160524687 | -2.397901419 | 0.016489302 | 0.063963808 |
| ENSMUSG00000054520 | 1093.912995 | -0.384845064 | 0.122073682 | -3.152563744 | 0.001618435 | 0.009901979 |
| ENSMUSG00000020100 | 747.4747726 | -0.38482733  | 0.137611287 | -2.796480863 | 0.005166247 | 0.025517713 |

|                    |             |              |             |              |             |             |
|--------------------|-------------|--------------|-------------|--------------|-------------|-------------|
| ENSMUSG00000035504 | 4096.482024 | -0.384581834 | 0.122913606 | -3.128879263 | 0.001754744 | 0.01056209  |
| ENSMUSG00000040860 | 2979.196154 | -0.384551094 | 0.123174199 | -3.122010099 | 0.001796208 | 0.010768072 |
| ENSMUSG00000030231 | 6143.919893 | -0.384406757 | 0.096754643 | -3.973005807 | 7.10E-05    | 0.0006828   |
| ENSMUSG00000053192 | 271.7395981 | -0.384350697 | 0.178690645 | -2.150927922 | 0.031481889 | 0.106310965 |
| ENSMUSG00000025572 | 2523.811148 | -0.384089938 | 0.131973656 | -2.910353093 | 0.003610206 | 0.019005422 |
| ENSMUSG00000040621 | 316.7825813 | -0.383848682 | 0.176556803 | -2.174080388 | 0.029699099 | 0.101503774 |
| ENSMUSG00000042331 | 2693.064923 | -0.383732274 | 0.134773886 | -2.847230158 | 0.004410146 | 0.022364448 |
| ENSMUSG00000027887 | 543.2106892 | -0.383717979 | 0.175207793 | -2.190073698 | 0.028518892 | 0.098497726 |
| ENSMUSG00000000561 | 1436.226659 | -0.383244224 | 0.185792942 | -2.062749099 | 0.039136472 | 0.125960813 |
| ENSMUSG00000002274 | 314.3991151 | -0.382998158 | 0.175848589 | -2.177999614 | 0.029406065 | 0.100858915 |
| ENSMUSG00000066735 | 1515.860902 | -0.382923126 | 0.17337974  | -2.208580574 | 0.027203828 | 0.095059944 |
| ENSMUSG00000000340 | 1608.028714 | -0.382833764 | 0.128338899 | -2.982990872 | 0.002854465 | 0.015795887 |
| ENSMUSG00000032105 | 560.8377383 | -0.38227047  | 0.189256439 | -2.019854502 | 0.043398482 | 0.136043188 |
| ENSMUSG00000015970 | 7276.889519 | -0.382212182 | 0.119129789 | -3.208367825 | 0.001334907 | 0.00841191  |
| ENSMUSG00000022436 | 512.871085  | -0.381938144 | 0.148144513 | -2.578145733 | 0.00993321  | 0.043156148 |
| ENSMUSG00000029189 | 5835.791815 | -0.381909432 | 0.099961758 | -3.82055538  | 0.000133152 | 0.00117368  |
| ENSMUSG00000020850 | 26224.99992 | -0.381802683 | 0.139982388 | -2.72750514  | 0.006381526 | 0.030231916 |
| ENSMUSG00000031311 | 16647.20657 | -0.381752627 | 0.117517967 | -3.248461794 | 0.001160308 | 0.007506825 |
| ENSMUSG00000020422 | 25223.8369  | -0.381377296 | 0.142480661 | -2.676695175 | 0.007435225 | 0.034280121 |
| ENSMUSG00000032232 | 1408.345016 | -0.381307002 | 0.18084539  | -2.108469578 | 0.034990392 | 0.115414986 |
| ENSMUSG00000032245 | 2122.670816 | -0.381270383 | 0.132539228 | -2.876660672 | 0.004019075 | 0.02075235  |
| ENSMUSG00000035397 | 2422.166851 | -0.381235637 | 0.112339078 | -3.393615518 | 0.000689765 | 0.004858636 |
| ENSMUSG00000022957 | 4271.558299 | -0.381146724 | 0.099670229 | -3.824077948 | 0.000131262 | 0.001160699 |
| ENSMUSG00000038393 | 19138.87507 | -0.381139618 | 0.105866806 | -3.600180572 | 0.000317996 | 0.00250765  |
| ENSMUSG00000021263 | 4784.57846  | -0.381092305 | 0.129584085 | -2.940888202 | 0.003272726 | 0.017612227 |
| ENSMUSG00000049313 | 14311.76438 | -0.380559813 | 0.106606974 | -3.569745952 | 0.000357328 | 0.002779478 |
| ENSMUSG00000040706 | 1748.09197  | -0.380508453 | 0.109818407 | -3.464887752 | 0.000530453 | 0.003893887 |
| ENSMUSG00000032431 | 466.3039379 | -0.380220412 | 0.178295499 | -2.132529496 | 0.032963342 | 0.110371023 |
| ENSMUSG00000050912 | 1173.855565 | -0.379917342 | 0.146481787 | -2.593614873 | 0.009497281 | 0.04167628  |



|                    |             |              |             |              |             |             |
|--------------------|-------------|--------------|-------------|--------------|-------------|-------------|
| ENSMUSG00000022428 | 654.0809753 | -0.37969857  | 0.149929614 | -2.532512162 | 0.011324844 | 0.04780529  |
| ENSMUSG00000046994 | 2019.340065 | -0.379681407 | 0.174286501 | -2.178490046 | 0.029369573 | 0.100749244 |
| ENSMUSG00000029456 | 1120.156624 | -0.379589565 | 0.151751584 | -2.501387823 | 0.012370763 | 0.051088959 |
| ENSMUSG00000022940 | 841.5247521 | -0.378976405 | 0.129821137 | -2.919219572 | 0.00350909  | 0.01860585  |
| ENSMUSG00000024869 | 260.9094785 | -0.378816067 | 0.192047789 | -1.972509396 | 0.048551485 | 0.147997083 |
| ENSMUSG00000061393 | 1086.705881 | -0.378520946 | 0.131168138 | -2.885768993 | 0.003904586 | 0.020245566 |
| ENSMUSG00000045975 | 1179.430541 | -0.378454942 | 0.13350726  | -2.834714319 | 0.004586668 | 0.023105328 |
| ENSMUSG00000040195 | 1449.621571 | -0.377465965 | 0.182626268 | -2.066876627 | 0.038745781 | 0.125010077 |
| ENSMUSG00000038888 | 721.2246832 | -0.377311747 | 0.144896464 | -2.604009357 | 0.009214024 | 0.040665338 |
| ENSMUSG00000020644 | 3269.095127 | -0.37726917  | 0.100585638 | -3.750726039 | 0.000176323 | 0.001498546 |
| ENSMUSG00000081051 | 696.6315856 | -0.376899228 | 0.126774608 | -2.972986736 | 0.002949172 | 0.016203371 |
| ENSMUSG00000020326 | 3680.041583 | -0.376692039 | 0.134067761 | -2.809713812 | 0.004958557 | 0.024694234 |
| ENSMUSG00000009772 | 3436.048045 | -0.376386576 | 0.144997168 | -2.595820193 | 0.009436543 | 0.041449322 |
| ENSMUSG00000003546 | 3996.534323 | -0.37612644  | 0.147256215 | -2.554231337 | 0.010642252 | 0.045533767 |
| ENSMUSG00000052539 | 7860.973752 | -0.375701814 | 0.112580578 | -3.337181436 | 0.000846327 | 0.005787775 |
| ENSMUSG00000028430 | 4734.490022 | -0.375438205 | 0.120493252 | -3.115844233 | 0.001834191 | 0.010969241 |
| ENSMUSG00000047710 | 1637.13902  | -0.375413463 | 0.142883372 | -2.627411846 | 0.008603713 | 0.038550965 |
| ENSMUSG00000022629 | 5245.233118 | -0.375126222 | 0.114037576 | -3.289496641 | 0.001003668 | 0.006663528 |
| ENSMUSG00000056962 | 5461.294656 | -0.374645765 | 0.129156926 | -2.900702081 | 0.003723277 | 0.01948212  |
| ENSMUSG00000030753 | 3661.977716 | -0.374614219 | 0.173423886 | -2.160107398 | 0.030764356 | 0.104346147 |
| ENSMUSG00000018999 | 1300.903167 | -0.374571856 | 0.13203141  | -2.836990499 | 0.004554097 | 0.022961997 |
| ENSMUSG00000045896 | 1833.176131 | -0.374511653 | 0.122279035 | -3.062762588 | 0.00219304  | 0.012703111 |
| ENSMUSG00000091994 | 602.9737351 | -0.374302431 | 0.138406065 | -2.704378816 | 0.006843223 | 0.032054339 |
| ENSMUSG00000025218 | 773.832925  | -0.374271601 | 0.132055417 | -2.834201039 | 0.004594042 | 0.023137248 |
| ENSMUSG00000044149 | 824.0273481 | -0.374179618 | 0.171942444 | -2.176191106 | 0.029540974 | 0.101103937 |
| ENSMUSG00000030551 | 891.9685864 | -0.374102965 | 0.140884489 | -2.655387884 | 0.007921726 | 0.036046198 |
| ENSMUSG00000041530 | 4510.881635 | -0.37363528  | 0.127459183 | -2.931411231 | 0.003374258 | 0.018062728 |
| ENSMUSG00000051557 | 1162.461115 | -0.373620116 | 0.147729787 | -2.529077736 | 0.011436269 | 0.048211767 |
| ENSMUSG00000033373 | 1088.360306 | -0.373607219 | 0.123111813 | -3.03469838  | 0.002407763 | 0.013710001 |

|                    |             |              |             |              |             |             |
|--------------------|-------------|--------------|-------------|--------------|-------------|-------------|
| ENSMUSG00000013629 | 9825.812138 | -0.373594094 | 0.158676415 | -2.354439969 | 0.01855064  | 0.070201564 |
| ENSMUSG00000045414 | 784.225574  | -0.373575563 | 0.126244145 | -2.959151597 | 0.003084873 | 0.016821318 |
| ENSMUSG00000033658 | 1854.964858 | -0.373265475 | 0.141054344 | -2.646252952 | 0.008138893 | 0.036861548 |
| ENSMUSG00000062075 | 8038.053646 | -0.373174848 | 0.095457277 | -3.909338908 | 9.25E-05    | 0.000856405 |
| ENSMUSG00000001768 | 3376.014248 | -0.372940289 | 0.133076335 | -2.802453856 | 0.005071547 | 0.02513346  |
| ENSMUSG00000033857 | 7729.727416 | -0.372704156 | 0.169453178 | -2.199452147 | 0.027845788 | 0.096697123 |
| ENSMUSG00000020268 | 228.6639149 | -0.37247774  | 0.180441196 | -2.064261085 | 0.038992969 | 0.12564401  |
| ENSMUSG00000036523 | 3544.751896 | -0.372073579 | 0.134909625 | -2.757946884 | 0.005816565 | 0.028052598 |
| ENSMUSG00000021120 | 726.3095408 | -0.372019256 | 0.168586995 | -2.206690115 | 0.027335716 | 0.095367061 |
| ENSMUSG00000026821 | 3680.018867 | -0.371970285 | 0.094598438 | -3.932097534 | 8.42E-05    | 0.00079137  |
| ENSMUSG00000027247 | 3830.482053 | -0.371914401 | 0.113738238 | -3.269915253 | 0.001075797 | 0.007072922 |
| ENSMUSG00000016253 | 2783.595416 | -0.371910875 | 0.120579551 | -3.084361095 | 0.002039898 | 0.011958193 |
| ENSMUSG00000024764 | 3273.191356 | -0.371621474 | 0.130097326 | -2.856488183 | 0.004283559 | 0.021839886 |
| ENSMUSG00000042787 | 1132.370521 | -0.371080997 | 0.14692736  | -2.525608557 | 0.011549809 | 0.04849789  |
| ENSMUSG00000075590 | 1771.38502  | -0.370932099 | 0.148143229 | -2.503874814 | 0.012284149 | 0.05082807  |
| ENSMUSG00000020781 | 2017.059814 | -0.370922469 | 0.11417095  | -3.248834036 | 0.001158791 | 0.007499185 |
| ENSMUSG00000014077 | 6641.012792 | -0.370853167 | 0.139555179 | -2.657394505 | 0.007874723 | 0.035883572 |
| ENSMUSG00000032553 | 872.1274755 | -0.370692015 | 0.143799457 | -2.577840157 | 0.009941998 | 0.043169098 |
| ENSMUSG00000041712 | 2466.940079 | -0.370664452 | 0.140686842 | -2.634677466 | 0.008421727 | 0.037888425 |
| ENSMUSG00000087138 | 547.7483438 | -0.370647608 | 0.16060705  | -2.307791647 | 0.021010728 | 0.077488866 |
| ENSMUSG00000021807 | 5125.076764 | -0.370446652 | 0.12389104  | -2.990100423 | 0.002788857 | 0.015502071 |
| ENSMUSG00000031969 | 1857.779439 | -0.370213847 | 0.129435582 | -2.860216968 | 0.004233513 | 0.021649063 |
| ENSMUSG00000030688 | 14039.74741 | -0.370042073 | 0.104329516 | -3.546858899 | 0.000389853 | 0.002992812 |
| ENSMUSG00000026174 | 3283.280311 | -0.369801047 | 0.153747347 | -2.405251569 | 0.016161336 | 0.06306456  |
| ENSMUSG00000067825 | 1926.144357 | -0.369797909 | 0.114163829 | -3.239186296 | 0.001198712 | 0.007706108 |
| ENSMUSG00000026676 | 1396.555063 | -0.369398276 | 0.18412843  | -2.006199021 | 0.044835018 | 0.139508187 |
| ENSMUSG00000005374 | 3575.007394 | -0.369229477 | 0.144405491 | -2.556893612 | 0.010561151 | 0.045275708 |
| ENSMUSG00000048170 | 8034.659218 | -0.369085708 | 0.123369762 | -2.991703177 | 0.002774259 | 0.015428614 |
| ENSMUSG00000090673 | 1754.416603 | -0.368834826 | 0.118889747 | -3.102326614 | 0.00192006  | 0.011394161 |

|                    |             |              |             |              |             |             |
|--------------------|-------------|--------------|-------------|--------------|-------------|-------------|
| ENSMUSG00000048039 | 4543.0346   | -0.368339159 | 0.140824583 | -2.615588496 | 0.008907384 | 0.039601986 |
| ENSMUSG00000074886 | 5608.948582 | -0.368129735 | 0.099363627 | -3.704874155 | 0.000211496 | 0.00176057  |
| ENSMUSG00000024486 | 5122.029999 | -0.368039806 | 0.183063802 | -2.010445546 | 0.044384054 | 0.138396083 |
| ENSMUSG00000023805 | 2633.238976 | -0.367751441 | 0.130346094 | -2.821346089 | 0.004782258 | 0.0239392   |
| ENSMUSG00000060510 | 4366.855913 | -0.367672158 | 0.146719062 | -2.505960392 | 0.01221193  | 0.050628296 |
| ENSMUSG00000024169 | 3477.545704 | -0.367625717 | 0.136314593 | -2.696891862 | 0.006998999 | 0.032626398 |
| ENSMUSG00000027082 | 542.5042193 | -0.367538988 | 0.180170214 | -2.039954212 | 0.041354886 | 0.131363815 |
| ENSMUSG00000066042 | 617.6588993 | -0.366994634 | 0.141446036 | -2.594591156 | 0.00947035  | 0.04156628  |
| ENSMUSG00000040463 | 20838.26365 | -0.366830388 | 0.135889216 | -2.699481229 | 0.006944767 | 0.032407461 |
| ENSMUSG00000068114 | 567.3043143 | -0.366758198 | 0.182786117 | -2.006488261 | 0.04480418  | 0.139472085 |
| ENSMUSG00000058838 | 560.0046792 | -0.366617294 | 0.139307474 | -2.631713025 | 0.008495559 | 0.038151321 |
| ENSMUSG00000026113 | 3990.286853 | -0.366588798 | 0.11388576  | -3.218916909 | 0.001286758 | 0.008154584 |
| ENSMUSG00000040272 | 465.2526986 | -0.366499848 | 0.15689715  | -2.335924191 | 0.019495193 | 0.07290699  |
| ENSMUSG00000078878 | 333.773862  | -0.366484661 | 0.16837276  | -2.176626796 | 0.029508424 | 0.101039055 |
| ENSMUSG00000039473 | 6431.60113  | -0.366106229 | 0.13310981  | -2.750407571 | 0.005952118 | 0.028539709 |
| ENSMUSG00000013155 | 572.8342156 | -0.365714318 | 0.146189341 | -2.501648307 | 0.012361666 | 0.051070304 |
| ENSMUSG00000024312 | 4174.809092 | -0.365591986 | 0.131625505 | -2.777516301 | 0.005477609 | 0.026730014 |
| ENSMUSG00000037904 | 800.3516841 | -0.365386084 | 0.143401779 | -2.547988501 | 0.010834604 | 0.046234694 |
| ENSMUSG00000051705 | 357.9375807 | -0.365273105 | 0.178338014 | -2.048206645 | 0.040539756 | 0.129375657 |
| ENSMUSG00000026248 | 1197.456734 | -0.364762411 | 0.127298881 | -2.865401542 | 0.004164808 | 0.02139092  |
| ENSMUSG00000021193 | 5613.614725 | -0.364708454 | 0.112695464 | -3.236230117 | 0.001211197 | 0.007770686 |
| ENSMUSG00000028826 | 2368.736135 | -0.364548685 | 0.112246446 | -3.247752576 | 0.001163204 | 0.007521603 |
| ENSMUSG00000001280 | 8136.91845  | -0.364515429 | 0.128210087 | -2.843110373 | 0.00446756  | 0.022599739 |
| ENSMUSG00000036061 | 937.813103  | -0.364508861 | 0.15985419  | -2.280258403 | 0.022592367 | 0.082110884 |
| ENSMUSG00000073700 | 3466.278527 | -0.363955886 | 0.156398377 | -2.327107823 | 0.019959527 | 0.074331592 |
| ENSMUSG00000021902 | 533.5998555 | -0.363763913 | 0.141998064 | -2.561752627 | 0.010414547 | 0.044750445 |
| ENSMUSG00000039166 | 2156.423029 | -0.363718735 | 0.148027942 | -2.457095122 | 0.014006559 | 0.05651978  |
| ENSMUSG00000017801 | 2082.726498 | -0.363519368 | 0.112827322 | -3.221909036 | 0.001273396 | 0.008101638 |
| ENSMUSG00000023882 | 418.7250558 | -0.363484424 | 0.1648186   | -2.205360465 | 0.02742881  | 0.095576546 |

|                    |             |              |             |              |             |             |
|--------------------|-------------|--------------|-------------|--------------|-------------|-------------|
| ENSMUSG00000027469 | 5601.754746 | -0.363449964 | 0.161878241 | -2.245205785 | 0.024754925 | 0.088371951 |
| ENSMUSG00000025041 | 1139.968134 | -0.363054448 | 0.111905787 | -3.244286628 | 0.001177452 | 0.007600103 |
| ENSMUSG00000050619 | 1845.322257 | -0.36229646  | 0.134200237 | -2.699670787 | 0.006940812 | 0.032395783 |
| ENSMUSG00000022673 | 5790.630233 | -0.362277443 | 0.155074159 | -2.336156101 | 0.019483107 | 0.072880235 |
| ENSMUSG00000024664 | 763.6597317 | -0.362181439 | 0.142679376 | -2.538428815 | 0.011135145 | 0.047183142 |
| ENSMUSG00000023232 | 4624.381916 | -0.361954348 | 0.106279025 | -3.405698795 | 0.000659949 | 0.004688606 |
| ENSMUSG00000020923 | 16781.8816  | -0.361878388 | 0.113966717 | -3.175298871 | 0.001496822 | 0.009256971 |
| ENSMUSG00000054723 | 1944.422868 | -0.361826195 | 0.16126459  | -2.243680368 | 0.024852974 | 0.08862267  |
| ENSMUSG00000031667 | 1791.967745 | -0.36175085  | 0.119063803 | -3.038294101 | 0.002379216 | 0.013580472 |
| ENSMUSG00000023990 | 1263.528282 | -0.361591076 | 0.122081795 | -2.961875474 | 0.003057714 | 0.016717353 |
| ENSMUSG00000042712 | 1974.345078 | -0.36109062  | 0.129106183 | -2.796849935 | 0.00516035  | 0.025499879 |
| ENSMUSG00000024042 | 2775.221427 | -0.361076297 | 0.140188328 | -2.575651634 | 0.010005139 | 0.043401779 |
| ENSMUSG00000020553 | 1323.736525 | -0.361067081 | 0.1293029   | -2.792412856 | 0.005231656 | 0.025766751 |
| ENSMUSG00000020044 | 1028.051573 | -0.360996244 | 0.159322928 | -2.265814778 | 0.023462726 | 0.084653334 |
| ENSMUSG00000047264 | 938.6892637 | -0.360460746 | 0.160845484 | -2.241037399 | 0.025023653 | 0.089093116 |
| ENSMUSG00000022994 | 27973.06497 | -0.360307236 | 0.110865163 | -3.249959027 | 0.001154216 | 0.00748261  |
| ENSMUSG00000004929 | 4671.023426 | -0.360266635 | 0.121126355 | -2.974304274 | 0.002936537 | 0.016149869 |
| ENSMUSG00000034902 | 5891.452355 | -0.359929157 | 0.102657758 | -3.506107704 | 0.000454711 | 0.003420072 |
| ENSMUSG00000074272 | 24944.9129  | -0.359902311 | 0.162808582 | -2.210585621 | 0.027064545 | 0.094773377 |
| ENSMUSG00000021365 | 4176.397833 | -0.359657698 | 0.141365755 | -2.544164236 | 0.010953957 | 0.046609698 |
| ENSMUSG00000056313 | 4489.819259 | -0.359371466 | 0.180371705 | -1.9923938   | 0.046327867 | 0.142958041 |
| ENSMUSG00000024645 | 1183.717056 | -0.359242689 | 0.137229943 | -2.617815631 | 0.00884946  | 0.039415182 |
| ENSMUSG00000001576 | 6372.555534 | -0.359070477 | 0.117554135 | -3.05451168  | 0.002254272 | 0.012990317 |
| ENSMUSG00000030029 | 26208.46438 | -0.359022886 | 0.097921803 | -3.666424389 | 0.000245966 | 0.002001927 |
| ENSMUSG00000026694 | 1676.90191  | -0.358877872 | 0.152874828 | -2.347527558 | 0.018898475 | 0.071275984 |
| ENSMUSG00000066306 | 23337.22793 | -0.358666861 | 0.111679814 | -3.211563929 | 0.001320146 | 0.008342469 |
| ENSMUSG00000109511 | 4228.673135 | -0.358241155 | 0.113285395 | -3.162288961 | 0.001565342 | 0.009624671 |
| ENSMUSG00000040599 | 1542.724173 | -0.357804636 | 0.161577445 | -2.214446669 | 0.026798068 | 0.094069527 |
| ENSMUSG00000035601 | 751.86925   | -0.357791754 | 0.132150839 | -2.707449736 | 0.006780234 | 0.031818982 |

|                    |             |              |             |              |             |             |
|--------------------|-------------|--------------|-------------|--------------|-------------|-------------|
| ENSMUSG00000002870 | 9498.147578 | -0.357531204 | 0.118174317 | -3.025456072 | 0.002482585 | 0.014080397 |
| ENSMUSG00000046822 | 1167.618815 | -0.357461123 | 0.122186875 | -2.925527987 | 0.003438722 | 0.018315488 |
| ENSMUSG00000020472 | 4190.689518 | -0.356525033 | 0.104944406 | -3.397275248 | 0.000680605 | 0.004804737 |
| ENSMUSG00000024431 | 8992.956128 | -0.356230587 | 0.11477693  | -3.1036776   | 0.001911315 | 0.011348305 |
| ENSMUSG00000046605 | 1063.025371 | -0.356158575 | 0.142413607 | -2.500874617 | 0.012388703 | 0.051136198 |
| ENSMUSG00000041645 | 7020.060551 | -0.355927489 | 0.126265541 | -2.818880629 | 0.004819144 | 0.024107609 |
| ENSMUSG00000004880 | 10510.96146 | -0.355923476 | 0.113240521 | -3.143075224 | 0.001671829 | 0.010158979 |
| ENSMUSG00000021640 | 2434.488302 | -0.355916575 | 0.106354879 | -3.346499731 | 0.000818388 | 0.005613922 |
| ENSMUSG00000063902 | 1229.934546 | -0.355709121 | 0.152200289 | -2.33711199  | 0.019433362 | 0.072796391 |
| ENSMUSG00000030780 | 3601.741101 | -0.355650291 | 0.101718716 | -3.496409544 | 0.000471564 | 0.003526612 |
| ENSMUSG00000027646 | 6203.49983  | -0.355558729 | 0.10284054  | -3.45737905  | 0.000545457 | 0.003983051 |
| ENSMUSG00000024997 | 3248.9316   | -0.355484692 | 0.117400432 | -3.027967505 | 0.002462046 | 0.013974568 |
| ENSMUSG00000015023 | 3466.769712 | -0.355456564 | 0.113142549 | -3.141670096 | 0.001679872 | 0.010201383 |
| ENSMUSG00000006732 | 1436.191275 | -0.355182218 | 0.143513128 | -2.474910995 | 0.013326938 | 0.054234316 |
| ENSMUSG00000034064 | 1292.69851  | -0.355114086 | 0.128199505 | -2.770011365 | 0.005605434 | 0.027199037 |
| ENSMUSG00000061411 | 2701.937045 | -0.354278641 | 0.132576456 | -2.67225911  | 0.007534245 | 0.034639987 |
| ENSMUSG00000052214 | 3741.295852 | -0.354275938 | 0.114638861 | -3.09036513  | 0.001999106 | 0.011784842 |
| ENSMUSG00000022186 | 6494.073726 | -0.353607119 | 0.120037772 | -2.945798759 | 0.003221219 | 0.017385384 |
| ENSMUSG00000032788 | 8141.287815 | -0.353552246 | 0.126554883 | -2.793667353 | 0.005211406 | 0.025689557 |
| ENSMUSG00000045466 | 1149.745686 | -0.353396337 | 0.115471573 | -3.060461775 | 0.00220996  | 0.012784516 |
| ENSMUSG00000033256 | 1159.105792 | -0.353063318 | 0.117890511 | -2.994840839 | 0.002745881 | 0.015315069 |
| ENSMUSG00000027333 | 896.219648  | -0.352869101 | 0.129435352 | -2.726218891 | 0.00640645  | 0.030326944 |
| ENSMUSG00000024960 | 64879.60318 | -0.352656586 | 0.097497304 | -3.617090649 | 0.000297933 | 0.002377175 |
| ENSMUSG00000030536 | 32719.58561 | -0.352367295 | 0.12708609  | -2.772666114 | 0.005559913 | 0.027026905 |
| ENSMUSG00000038508 | 606.3021005 | -0.352233708 | 0.155295528 | -2.268151014 | 0.023320004 | 0.08420651  |
| ENSMUSG00000075595 | 5156.348444 | -0.352199571 | 0.130922209 | -2.690143813 | 0.007142123 | 0.033154973 |
| ENSMUSG00000026355 | 13714.4921  | -0.352100661 | 0.130001995 | -2.70842505  | 0.006760338 | 0.031746114 |
| ENSMUSG00000039246 | 320.9589036 | -0.351863064 | 0.170571724 | -2.062845205 | 0.039127338 | 0.125960813 |
| ENSMUSG00000061607 | 7114.190582 | -0.351833318 | 0.152871762 | -2.301493175 | 0.021363771 | 0.07860641  |

|                    |             |              |             |              |             |             |
|--------------------|-------------|--------------|-------------|--------------|-------------|-------------|
| ENSMUSG00000055717 | 1622.578486 | -0.351744053 | 0.113900094 | -3.088180545 | 0.002013861 | 0.011853025 |
| ENSMUSG00000037795 | 3006.418427 | -0.351277624 | 0.123852651 | -2.836254372 | 0.004564607 | 0.022999392 |
| ENSMUSG00000022704 | 2104.531065 | -0.350947559 | 0.114206546 | -3.072919816 | 0.002119754 | 0.012352402 |
| ENSMUSG00000029998 | 4254.079552 | -0.350706956 | 0.109838015 | -3.19294696  | 0.001408288 | 0.008807132 |
| ENSMUSG00000032702 | 4681.532652 | -0.350525249 | 0.109368338 | -3.204997486 | 0.001350637 | 0.008499026 |
| ENSMUSG00000045438 | 1256.247006 | -0.350482279 | 0.119762171 | -2.926485695 | 0.003428153 | 0.018281022 |
| ENSMUSG00000026933 | 3351.536885 | -0.350477551 | 0.120279278 | -2.913864775 | 0.003569845 | 0.018851791 |
| ENSMUSG00000039254 | 2986.480126 | -0.349996152 | 0.115392078 | -3.033103815 | 0.002420523 | 0.013763408 |
| ENSMUSG00000028412 | 7937.367103 | -0.349971874 | 0.137402179 | -2.547062033 | 0.010863412 | 0.046331029 |
| ENSMUSG00000005566 | 26550.11431 | -0.349425462 | 0.097962307 | -3.566937881 | 0.000361177 | 0.002807462 |
| ENSMUSG00000033454 | 2823.617601 | -0.349241821 | 0.149562138 | -2.335095139 | 0.019538451 | 0.073047276 |
| ENSMUSG00000020083 | 560.1204972 | -0.348151504 | 0.149540558 | -2.328140991 | 0.019904618 | 0.074178402 |
| ENSMUSG00000029053 | 2967.327777 | -0.347591007 | 0.116534244 | -2.982737059 | 0.002856833 | 0.01580507  |
| ENSMUSG00000005899 | 4005.519051 | -0.347551656 | 0.127503954 | -2.725810813 | 0.006414375 | 0.030351577 |
| ENSMUSG00000026036 | 1472.662376 | -0.347384996 | 0.126139776 | -2.753968697 | 0.00588774  | 0.028296931 |
| ENSMUSG00000019731 | 3840.675318 | -0.347044308 | 0.119211397 | -2.911167197 | 0.003600813 | 0.018974888 |
| ENSMUSG00000038014 | 30771.38432 | -0.346847513 | 0.092305041 | -3.757622634 | 0.000171535 | 0.001463431 |
| ENSMUSG00000000957 | 3478.821826 | -0.346578643 | 0.117227192 | -2.956469711 | 0.003111828 | 0.016921321 |
| ENSMUSG00000074358 | 1666.599161 | -0.346221006 | 0.10468703  | -3.307200582 | 0.000942334 | 0.006328735 |
| ENSMUSG00000038949 | 1834.682937 | -0.346017276 | 0.117323497 | -2.949258113 | 0.003185378 | 0.017237096 |
| ENSMUSG00000048175 | 1109.780112 | -0.345996397 | 0.116590687 | -2.967616081 | 0.003001189 | 0.016450183 |
| ENSMUSG00000044617 | 3950.049281 | -0.345656511 | 0.132122406 | -2.616183889 | 0.008891866 | 0.039556652 |
| ENSMUSG00000028107 | 4729.122005 | -0.345330765 | 0.102433472 | -3.371268758 | 0.000748228 | 0.005201446 |
| ENSMUSG00000001729 | 12177.40838 | -0.345234498 | 0.117444552 | -2.939553114 | 0.003286859 | 0.017657379 |
| ENSMUSG00000006705 | 1564.71383  | -0.344801386 | 0.159281251 | -2.16473303  | 0.030408136 | 0.10334225  |
| ENSMUSG00000038838 | 4923.921207 | -0.344631411 | 0.105736087 | -3.259354684 | 0.00111666  | 0.007285731 |
| ENSMUSG00000046897 | 4288.901735 | -0.344506297 | 0.116919186 | -2.946533498 | 0.003213576 | 0.017356735 |
| ENSMUSG00000047248 | 6192.160693 | -0.344258377 | 0.13049317  | -2.638133304 | 0.00833638  | 0.037595474 |
| ENSMUSG00000033685 | 23381.90668 | -0.344048778 | 0.114355925 | -3.008578497 | 0.00262473  | 0.014766423 |

|                     |             |              |             |              |             |             |
|---------------------|-------------|--------------|-------------|--------------|-------------|-------------|
| ENSMUSG00000001983  | 1268.204727 | -0.343700942 | 0.115446234 | -2.977151627 | 0.002909401 | 0.016040185 |
| ENSMUSG000000051517 | 2141.452877 | -0.343549603 | 0.112487226 | -3.054121041 | 0.00225721  | 0.013003885 |
| ENSMUSG000000045969 | 3817.015955 | -0.342899031 | 0.130205314 | -2.633525634 | 0.008450346 | 0.037994185 |
| ENSMUSG000000047613 | 1377.518889 | -0.342883954 | 0.119997714 | -2.857420712 | 0.004270993 | 0.021790762 |
| ENSMUSG000000038252 | 13721.68032 | -0.34281477  | 0.13058391  | -2.625245102 | 0.008658661 | 0.038704511 |
| ENSMUSG000000026972 | 3328.696725 | -0.342699418 | 0.099019361 | -3.46093343  | 0.000538306 | 0.003937041 |
| ENSMUSG000000038299 | 4280.11857  | -0.342656234 | 0.131606079 | -2.603650497 | 0.009223676 | 0.040699882 |
| ENSMUSG000000021646 | 2639.018612 | -0.341356932 | 0.126127634 | -2.706440467 | 0.006800878 | 0.031889481 |
| ENSMUSG000000041609 | 464.4125333 | -0.341354903 | 0.136868205 | -2.494040911 | 0.012629799 | 0.051918367 |
| ENSMUSG000000081406 | 808.1492338 | -0.341322068 | 0.14544995  | -2.346663354 | 0.018942361 | 0.07138114  |
| ENSMUSG000000074746 | 6720.68136  | -0.340985551 | 0.125547391 | -2.715990729 | 0.006607777 | 0.031128017 |
| ENSMUSG000000078877 | 506.4131491 | -0.340930598 | 0.139435453 | -2.44507828  | 0.014482071 | 0.058014129 |
| ENSMUSG000000028068 | 7432.593644 | -0.340320708 | 0.12344732  | -2.756809207 | 0.00583684  | 0.028126051 |
| ENSMUSG00000001228  | 11609.25932 | -0.340093446 | 0.110914789 | -3.066258777 | 0.002167556 | 0.012578369 |
| ENSMUSG000000026603 | 6938.83605  | -0.339742401 | 0.099485012 | -3.415010912 | 0.000637795 | 0.00455089  |
| ENSMUSG00000003779  | 5033.381806 | -0.339578185 | 0.131425346 | -2.583810477 | 0.009771547 | 0.042611513 |
| ENSMUSG000000033068 | 2049.954412 | -0.339036744 | 0.102725681 | -3.30040882  | 0.000965441 | 0.006448127 |
| ENSMUSG000000025223 | 5489.42659  | -0.339011228 | 0.098638706 | -3.436898592 | 0.000588416 | 0.004256854 |
| ENSMUSG000000026558 | 10577.21051 | -0.338915062 | 0.112182012 | -3.021117691 | 0.002518435 | 0.014251106 |
| ENSMUSG000000030671 | 1740.954276 | -0.338590922 | 0.152162629 | -2.225191064 | 0.026068414 | 0.091971478 |
| ENSMUSG000000032601 | 10772.27118 | -0.338513634 | 0.133332456 | -2.538868965 | 0.011121147 | 0.047150702 |
| ENSMUSG000000018166 | 22013.13314 | -0.33834352  | 0.107411933 | -3.149962101 | 0.001632916 | 0.009965974 |
| ENSMUSG000000029381 | 29971.825   | -0.338113982 | 0.096428532 | -3.50636866  | 0.000454266 | 0.003417873 |
| ENSMUSG000000070473 | 15369.46379 | -0.33716081  | 0.115574572 | -2.917257693 | 0.003531239 | 0.018705501 |
| ENSMUSG000000036285 | 2880.338455 | -0.337130312 | 0.117612281 | -2.866455006 | 0.004150972 | 0.021344436 |
| ENSMUSG000000035266 | 2070.735155 | -0.336873934 | 0.154720321 | -2.177308914 | 0.029457527 | 0.100953317 |
| ENSMUSG000000028621 | 664.751201  | -0.33674146  | 0.137946714 | -2.441098093 | 0.014642677 | 0.058489403 |
| ENSMUSG000000030978 | 8522.24991  | -0.336653685 | 0.158813109 | -2.119810434 | 0.034022035 | 0.112955993 |
| ENSMUSG00000000325  | 1455.760593 | -0.336071016 | 0.120558146 | -2.787625938 | 0.005309581 | 0.026058312 |

|                    |             |              |             |              |             |             |
|--------------------|-------------|--------------|-------------|--------------|-------------|-------------|
| ENSMUSG00000004530 | 6832.276222 | -0.335761844 | 0.10346062  | -3.245310565 | 0.001173226 | 0.007577212 |
| ENSMUSG00000030590 | 2784.393297 | -0.334687121 | 0.140183932 | -2.387485612 | 0.016964067 | 0.065455991 |
| ENSMUSG00000021710 | 2495.812485 | -0.334685088 | 0.113416388 | -2.950941168 | 0.003168073 | 0.017171385 |
| ENSMUSG00000040600 | 15202.70626 | -0.334650857 | 0.137330758 | -2.436823774 | 0.014816898 | 0.059026732 |
| ENSMUSG00000025316 | 1512.497979 | -0.334469617 | 0.169875816 | -1.968906617 | 0.048963816 | 0.148907957 |
| ENSMUSG00000026917 | 4015.611477 | -0.333642053 | 0.132787589 | -2.512599666 | 0.011984525 | 0.04991126  |
| ENSMUSG00000053477 | 1758.839137 | -0.333601247 | 0.112129259 | -2.975148938 | 0.002928463 | 0.016117389 |
| ENSMUSG00000039202 | 9619.73133  | -0.333526892 | 0.122132922 | -2.73085166  | 0.00631709  | 0.029986679 |
| ENSMUSG00000035726 | 17637.70544 | -0.333434499 | 0.160757435 | -2.074146677 | 0.038065691 | 0.123225863 |
| ENSMUSG00000032109 | 316.1281263 | -0.333409114 | 0.168375595 | -1.980151067 | 0.047686556 | 0.14603926  |
| ENSMUSG00000023022 | 15253.76479 | -0.333148147 | 0.103380234 | -3.222551693 | 0.001270542 | 0.0080886   |
| ENSMUSG00000078684 | 2954.81269  | -0.333128218 | 0.136910756 | -2.433177849 | 0.014966947 | 0.059475747 |
| ENSMUSG00000031948 | 11679.74192 | -0.33312506  | 0.10525745  | -3.164859693 | 0.001551578 | 0.009547939 |
| ENSMUSG00000028868 | 8238.31248  | -0.332995831 | 0.095745423 | -3.477929501 | 0.000505303 | 0.003745018 |
| ENSMUSG00000032718 | 2188.392223 | -0.332892629 | 0.116313288 | -2.86203438  | 0.004209312 | 0.021569825 |
| ENSMUSG00000030872 | 1385.692633 | -0.332724638 | 0.112588067 | -2.955238915 | 0.00312427  | 0.016968911 |
| ENSMUSG00000027315 | 7627.272061 | -0.33252318  | 0.110609129 | -3.006290564 | 0.002644562 | 0.014851767 |
| ENSMUSG00000048186 | 2012.257045 | -0.332509504 | 0.125810523 | -2.642938723 | 0.008218991 | 0.037171307 |
| ENSMUSG00000027459 | 993.9183864 | -0.332410312 | 0.142043418 | -2.340202146 | 0.019273305 | 0.072377947 |
| ENSMUSG00000029060 | 1988.243667 | -0.332389309 | 0.136077962 | -2.442638795 | 0.014580322 | 0.058323903 |
| ENSMUSG00000037257 | 2443.47972  | -0.33212565  | 0.123339004 | -2.692786867 | 0.007085755 | 0.032941301 |
| ENSMUSG00000021033 | 2672.985228 | -0.331994622 | 0.115860857 | -2.865459755 | 0.004164042 | 0.02139092  |
| ENSMUSG00000031728 | 892.7151712 | -0.331853755 | 0.136740295 | -2.42689073  | 0.015228842 | 0.060248075 |
| ENSMUSG00000020899 | 6705.600749 | -0.331630418 | 0.131444739 | -2.522964551 | 0.011637013 | 0.048770346 |
| ENSMUSG00000038046 | 884.4988815 | -0.331563275 | 0.13802066  | -2.402272784 | 0.016293553 | 0.063469438 |
| ENSMUSG00000007035 | 407.723058  | -0.331427648 | 0.150638329 | -2.200154831 | 0.027795912 | 0.096564543 |
| ENSMUSG00000020611 | 5363.447372 | -0.331414647 | 0.111566482 | -2.970557481 | 0.002972598 | 0.016311984 |
| ENSMUSG00000063146 | 10314.42156 | -0.331324543 | 0.113365756 | -2.922615746 | 0.003471046 | 0.018447996 |
| ENSMUSG00000016554 | 13183.33684 | -0.331311982 | 0.092153461 | -3.59522019  | 0.000324117 | 0.002553211 |



|                    |             |              |             |              |             |             |
|--------------------|-------------|--------------|-------------|--------------|-------------|-------------|
| ENSMUSG00000051223 | 12574.8336  | -0.330878062 | 0.132444295 | -2.498243231 | 0.012481052 | 0.051439651 |
| ENSMUSG00000058558 | 34064.34608 | -0.330858198 | 0.118699215 | -2.787366366 | 0.005313837 | 0.026067723 |
| ENSMUSG00000048550 | 444.0187654 | -0.330842268 | 0.154278831 | -2.144443699 | 0.031997352 | 0.107801261 |
| ENSMUSG00000023452 | 3502.886376 | -0.330479556 | 0.128739259 | -2.567045654 | 0.010256911 | 0.044260713 |
| ENSMUSG00000073838 | 9887.375224 | -0.330472415 | 0.097148816 | -3.401713252 | 0.000669649 | 0.004737891 |
| ENSMUSG00000034189 | 1394.369622 | -0.330283536 | 0.128123983 | -2.577843177 | 0.009941911 | 0.043169098 |
| ENSMUSG00000024442 | 3587.705888 | -0.330213316 | 0.114891231 | -2.874138553 | 0.004051312 | 0.020894613 |
| ENSMUSG00000002825 | 1806.01071  | -0.330163555 | 0.135433073 | -2.437835517 | 0.014775495 | 0.05892495  |
| ENSMUSG00000041684 | 935.0313154 | -0.329786612 | 0.154099313 | -2.140091388 | 0.032347382 | 0.108756063 |
| ENSMUSG00000030407 | 842.9247161 | -0.329411192 | 0.128655872 | -2.560405428 | 0.010455011 | 0.044895915 |
| ENSMUSG00000000544 | 11098.14754 | -0.329374597 | 0.095241696 | -3.458302537 | 0.000543591 | 0.003972023 |
| ENSMUSG00000027067 | 12505.61375 | -0.32893194  | 0.114621263 | -2.869728803 | 0.00410824  | 0.02114909  |
| ENSMUSG00000030281 | 2936.24498  | -0.328921092 | 0.104384681 | -3.151047541 | 0.00162686  | 0.009934449 |
| ENSMUSG00000038991 | 11893.30591 | -0.328877323 | 0.114083471 | -2.882778027 | 0.003941851 | 0.020405576 |
| ENSMUSG00000031320 | 66183.85516 | -0.328836479 | 0.102188788 | -3.2179311   | 0.001291188 | 0.008178015 |
| ENSMUSG00000025474 | 2821.281325 | -0.328742957 | 0.116766995 | -2.815375666 | 0.004872025 | 0.024312155 |
| ENSMUSG00000039193 | 5477.863988 | -0.328741215 | 0.13937993  | -2.358597936 | 0.018344119 | 0.069632713 |
| ENSMUSG00000056612 | 4226.277692 | -0.328537144 | 0.101899769 | -3.224120581 | 0.001263602 | 0.00805131  |
| ENSMUSG00000051339 | 14371.68324 | -0.328392567 | 0.105451518 | -3.114156864 | 0.001844714 | 0.0110115   |
| ENSMUSG00000029516 | 15742.22433 | -0.328183821 | 0.132215895 | -2.482181294 | 0.013058082 | 0.053383737 |
| ENSMUSG00000021175 | 4486.883141 | -0.328160281 | 0.118340641 | -2.773014219 | 0.005553969 | 0.027018352 |
| ENSMUSG00000023018 | 2514.246114 | -0.327952961 | 0.122764042 | -2.671408954 | 0.007553356 | 0.0347028   |
| ENSMUSG00000029387 | 2133.363452 | -0.327817682 | 0.111885826 | -2.9299304   | 0.003390379 | 0.018122927 |
| ENSMUSG00000071645 | 1886.256058 | -0.327526005 | 0.117380731 | -2.790287655 | 0.005266123 | 0.025890611 |
| ENSMUSG00000020186 | 7749.830054 | -0.327487975 | 0.123755426 | -2.646251445 | 0.008138929 | 0.036861548 |
| ENSMUSG00000020610 | 2031.975751 | -0.327457279 | 0.116672536 | -2.806635482 | 0.005006186 | 0.024848196 |
| ENSMUSG00000078429 | 11983.7788  | -0.327426963 | 0.09433067  | -3.471055214 | 0.000518417 | 0.003823157 |
| ENSMUSG00000002748 | 22644.61431 | -0.327266542 | 0.129981466 | -2.517793897 | 0.01180924  | 0.049342458 |
| ENSMUSG00000020534 | 10018.62508 | -0.326976382 | 0.108738805 | -3.00698893  | 0.002638494 | 0.014828893 |

|                    |             |              |             |              |             |             |
|--------------------|-------------|--------------|-------------|--------------|-------------|-------------|
| ENSMUSG00000025967 | 40712.47674 | -0.326701022 | 0.098951086 | -3.301641586 | 0.000961208 | 0.006429485 |
| ENSMUSG00000052485 | 1600.430699 | -0.326661254 | 0.121287306 | -2.69328478  | 0.007075181 | 0.032912726 |
| ENSMUSG00000005483 | 9112.633915 | -0.326305605 | 0.165446274 | -1.972275329 | 0.048578184 | 0.148038001 |
| ENSMUSG00000071652 | 2620.867843 | -0.326256155 | 0.137437305 | -2.37385442  | 0.01760349  | 0.067383354 |
| ENSMUSG00000015790 | 1681.522882 | -0.326097676 | 0.13478459  | -2.419398808 | 0.015546186 | 0.061251264 |
| ENSMUSG00000028629 | 905.1905961 | -0.326013255 | 0.122837692 | -2.654016444 | 0.007953995 | 0.036163516 |
| ENSMUSG00000034781 | 9213.551421 | -0.325238554 | 0.105190919 | -3.091888136 | 0.001988878 | 0.011727648 |
| ENSMUSG00000037905 | 5089.953734 | -0.32520916  | 0.112773054 | -2.883748794 | 0.003929721 | 0.020352231 |
| ENSMUSG00000055491 | 8160.96519  | -0.325151047 | 0.154160285 | -2.109175184 | 0.034929463 | 0.115299283 |
| ENSMUSG00000032513 | 1927.455585 | -0.324879538 | 0.117598213 | -2.762623087 | 0.005733894 | 0.027737867 |
| ENSMUSG00000025722 | 1284.979413 | -0.324834729 | 0.111723548 | -2.907486689 | 0.003643459 | 0.019140817 |
| ENSMUSG00000031090 | 3502.571218 | -0.324241122 | 0.106401395 | -3.047339016 | 0.002308772 | 0.013242776 |
| ENSMUSG00000054792 | 1152.253888 | -0.323931995 | 0.114509826 | -2.828857637 | 0.004671447 | 0.023458219 |
| ENSMUSG00000007610 | 1733.691361 | -0.323589544 | 0.106766075 | -3.030827385 | 0.002438846 | 0.013854766 |
| ENSMUSG00000024277 | 2227.631205 | -0.323484593 | 0.137453583 | -2.353409682 | 0.018602126 | 0.070360587 |
| ENSMUSG00000032350 | 5665.573829 | -0.323161302 | 0.097272017 | -3.322243266 | 0.000892968 | 0.006062125 |
| ENSMUSG00000012350 | 15364.58549 | -0.322886563 | 0.135159842 | -2.3889238   | 0.016897807 | 0.065275937 |
| ENSMUSG00000030609 | 2180.565255 | -0.322853484 | 0.163099866 | -1.979483439 | 0.047761602 | 0.146228926 |
| ENSMUSG00000034320 | 5396.613068 | -0.322837834 | 0.114975228 | -2.807890369 | 0.00498672  | 0.024781156 |
| ENSMUSG00000031652 | 5014.999512 | -0.322811907 | 0.128694448 | -2.50835923  | 0.012129329 | 0.050362346 |
| ENSMUSG00000018846 | 4792.983065 | -0.322517836 | 0.1153399   | -2.796238213 | 0.005170128 | 0.025531227 |
| ENSMUSG00000028886 | 3516.719909 | -0.322183708 | 0.118022534 | -2.729849097 | 0.006336332 | 0.030058827 |
| ENSMUSG00000050973 | 859.2623937 | -0.321837139 | 0.119982086 | -2.682376598 | 0.007310112 | 0.033815142 |
| ENSMUSG00000018446 | 10750.31237 | -0.3218337   | 0.118228233 | -2.722139135 | 0.006486083 | 0.030655232 |
| ENSMUSG00000059552 | 8861.088534 | -0.321301739 | 0.1005878   | -3.194241645 | 0.001401987 | 0.008770186 |
| ENSMUSG00000036718 | 1555.770194 | -0.321276434 | 0.15154716  | -2.119976609 | 0.034008018 | 0.112950807 |
| ENSMUSG00000059810 | 2682.980342 | -0.32125456  | 0.113612044 | -2.82764528  | 0.004689173 | 0.023531335 |
| ENSMUSG00000041115 | 2447.483045 | -0.321194497 | 0.123426379 | -2.602316445 | 0.009259637 | 0.040826248 |
| ENSMUSG00000004934 | 2052.739697 | -0.321040828 | 0.108975335 | -2.945995326 | 0.003219173 | 0.017382753 |

|                    |             |              |             |              |             |             |
|--------------------|-------------|--------------|-------------|--------------|-------------|-------------|
| ENSMUSG00000017264 | 4300.847596 | -0.320990361 | 0.110951715 | -2.893063522 | 0.003815041 | 0.019864403 |
| ENSMUSG00000025025 | 1547.113025 | -0.32094719  | 0.11768214  | -2.72723787  | 0.006386698 | 0.030246284 |
| ENSMUSG00000008601 | 4937.198495 | -0.320668953 | 0.118089582 | -2.715472001 | 0.006618137 | 0.031170238 |
| ENSMUSG00000040711 | 883.3135508 | -0.320599425 | 0.148509815 | -2.158775998 | 0.030867549 | 0.104648407 |
| ENSMUSG00000051586 | 4708.062011 | -0.320350811 | 0.115913949 | -2.763695085 | 0.005715092 | 0.027658911 |
| ENSMUSG00000029247 | 6795.142886 | -0.320232589 | 0.102836396 | -3.11400051  | 0.001845692 | 0.011014389 |
| ENSMUSG00000028104 | 814.5774418 | -0.320159005 | 0.138621218 | -2.309595966 | 0.020910533 | 0.077231832 |
| ENSMUSG00000036693 | 4320.361109 | -0.320138293 | 0.12492429  | -2.562658491 | 0.010387417 | 0.044693266 |
| ENSMUSG00000058230 | 7868.417263 | -0.320002912 | 0.139696632 | -2.29069884  | 0.021980838 | 0.080321257 |
| ENSMUSG00000029366 | 1711.131273 | -0.319859525 | 0.135095725 | -2.367650971 | 0.017901415 | 0.068324397 |
| ENSMUSG00000045752 | 1476.428801 | -0.319838785 | 0.108010027 | -2.961195309 | 0.003064475 | 0.016737905 |
| ENSMUSG00000028937 | 3583.987535 | -0.319760076 | 0.118872185 | -2.689948663 | 0.007146301 | 0.033167464 |
| ENSMUSG00000060675 | 2340.21136  | -0.319640383 | 0.114777872 | -2.784860681 | 0.005355073 | 0.026252687 |
| ENSMUSG00000029461 | 1771.663936 | -0.319468691 | 0.139673862 | -2.287247487 | 0.022181382 | 0.080920496 |
| ENSMUSG00000037815 | 23838.8525  | -0.319131264 | 0.109070758 | -2.925910375 | 0.003434499 | 0.018306108 |
| ENSMUSG00000030216 | 5362.724406 | -0.318630653 | 0.128008221 | -2.489142116 | 0.012805177 | 0.052516734 |
| ENSMUSG00000043716 | 69934.76312 | -0.31847245  | 0.103369048 | -3.080926608 | 0.002063575 | 0.012082003 |
| ENSMUSG00000037331 | 22514.7419  | -0.318407819 | 0.12518197  | -2.543559746 | 0.010972929 | 0.046664243 |
| ENSMUSG00000036006 | 1033.598585 | -0.318401243 | 0.145402171 | -2.189797027 | 0.02853896  | 0.098551774 |
| ENSMUSG00000002129 | 7817.535646 | -0.318338761 | 0.110966875 | -2.868772869 | 0.004120676 | 0.021202905 |
| ENSMUSG00000040213 | 689.6448487 | -0.317805665 | 0.128111937 | -2.480687372 | 0.013112933 | 0.053558884 |
| ENSMUSG00000027551 | 2413.811922 | -0.317795023 | 0.108091215 | -2.940063389 | 0.003281451 | 0.017646405 |
| ENSMUSG00000033323 | 3387.599469 | -0.317158708 | 0.107891066 | -2.939619732 | 0.003286153 | 0.017657379 |
| ENSMUSG00000058886 | 3638.480238 | -0.316880198 | 0.108800197 | -2.91249654  | 0.003585522 | 0.018898776 |
| ENSMUSG00000040659 | 5107.322479 | -0.316802318 | 0.106557465 | -2.973065449 | 0.002948416 | 0.016203208 |
| ENSMUSG00000024120 | 11121.62525 | -0.316504084 | 0.123147226 | -2.570127597 | 0.010166106 | 0.043936887 |
| ENSMUSG00000045598 | 2324.546294 | -0.316360675 | 0.13184945  | -2.399408381 | 0.016421589 | 0.063833726 |
| ENSMUSG00000022433 | 2648.169135 | -0.316317946 | 0.123252509 | -2.566421976 | 0.010275374 | 0.044306093 |
| ENSMUSG00000022314 | 14684.43798 | -0.315758194 | 0.130612959 | -2.417510453 | 0.015627085 | 0.061463779 |

|                    |             |              |             |              |             |             |
|--------------------|-------------|--------------|-------------|--------------|-------------|-------------|
| ENSMUSG00000036555 | 1924.152692 | -0.315582149 | 0.102024668 | -3.093194557 | 0.001980143 | 0.011694694 |
| ENSMUSG00000022221 | 2761.697781 | -0.315517282 | 0.119563099 | -2.638918568 | 0.008317096 | 0.037531273 |
| ENSMUSG00000022075 | 1585.857084 | -0.31548349  | 0.110438084 | -2.85665485  | 0.004281311 | 0.021833414 |
| ENSMUSG00000021189 | 1769.077315 | -0.314914386 | 0.139314288 | -2.260460078 | 0.023792711 | 0.085649156 |
| ENSMUSG00000005802 | 2675.022056 | -0.314827354 | 0.133804197 | -2.352895958 | 0.018627845 | 0.070413079 |
| ENSMUSG00000032300 | 3523.966602 | -0.314750082 | 0.133091721 | -2.364911062 | 0.018034401 | 0.068749604 |
| ENSMUSG00000046711 | 18755.79892 | -0.314730748 | 0.109259103 | -2.880590622 | 0.003969308 | 0.020529007 |
| ENSMUSG00000029705 | 8842.684954 | -0.314581697 | 0.108249349 | -2.906083974 | 0.003659832 | 0.019204216 |
| ENSMUSG00000041895 | 2036.859189 | -0.314498196 | 0.115132239 | -2.731625821 | 0.006302267 | 0.029929059 |
| ENSMUSG00000037029 | 2832.113226 | -0.314397085 | 0.11080236  | -2.837458385 | 0.004547427 | 0.022934524 |
| ENSMUSG00000021906 | 1747.125019 | -0.314254845 | 0.104496011 | -3.00733818  | 0.002635464 | 0.014815599 |
| ENSMUSG00000049327 | 9203.319064 | -0.314202354 | 0.109081413 | -2.880438978 | 0.003971218 | 0.020529007 |
| ENSMUSG00000034525 | 6952.768768 | -0.313746684 | 0.129212208 | -2.428150478 | 0.015176045 | 0.060081836 |
| ENSMUSG00000024177 | 681.1215138 | -0.313570837 | 0.134919032 | -2.324140874 | 0.020117945 | 0.074812455 |
| ENSMUSG00000001053 | 984.3613774 | -0.313477426 | 0.145844817 | -2.149390233 | 0.031603479 | 0.106656959 |
| ENSMUSG00000025507 | 2008.701312 | -0.313111907 | 0.133079053 | -2.352880216 | 0.018628634 | 0.070413079 |
| ENSMUSG00000021222 | 1319.737068 | -0.312567583 | 0.124813743 | -2.504272162 | 0.012270361 | 0.050787177 |
| ENSMUSG00000031819 | 1701.402976 | -0.312473468 | 0.119051835 | -2.624684182 | 0.008672937 | 0.038737266 |
| ENSMUSG00000038615 | 6697.327346 | -0.312346381 | 0.122486258 | -2.550052444 | 0.010770672 | 0.045976533 |
| ENSMUSG00000020888 | 2296.309706 | -0.312052417 | 0.118506375 | -2.633212064 | 0.008458152 | 0.038016516 |
| ENSMUSG00000005481 | 7765.024384 | -0.311592586 | 0.09613212  | -3.24129528  | 0.001189879 | 0.007658148 |
| ENSMUSG00000022231 | 13672.32531 | -0.311565209 | 0.118201407 | -2.635884102 | 0.008391839 | 0.037776827 |
| ENSMUSG00000041147 | 3162.196407 | -0.311378693 | 0.142251174 | -2.188935841 | 0.028601504 | 0.098737172 |
| ENSMUSG00000099966 | 405.9901205 | -0.311308299 | 0.150313368 | -2.071061966 | 0.038353006 | 0.123993966 |
| ENSMUSG00000026816 | 2035.443234 | -0.31118211  | 0.103933716 | -2.994043923 | 0.002753063 | 0.015345179 |
| ENSMUSG00000023932 | 6630.043063 | -0.311093077 | 0.12363971  | -2.516125897 | 0.011865279 | 0.049536602 |
| ENSMUSG00000038145 | 2204.876458 | -0.310891445 | 0.118303252 | -2.627919699 | 0.008590879 | 0.038509588 |
| ENSMUSG00000030432 | 48534.15426 | -0.310697199 | 0.120292873 | -2.582839613 | 0.009799087 | 0.042673195 |
| ENSMUSG00000046352 | 1970.993828 | -0.310377323 | 0.127529674 | -2.433765519 | 0.014942671 | 0.059421633 |

|                    |             |              |             |              |             |             |
|--------------------|-------------|--------------|-------------|--------------|-------------|-------------|
| ENSMUSG00000042389 | 868.1438597 | -0.310376402 | 0.123773308 | -2.507619834 | 0.012154736 | 0.050439666 |
| ENSMUSG00000035781 | 2427.745082 | -0.310214265 | 0.098832978 | -3.138772829 | 0.001696569 | 0.010278508 |
| ENSMUSG00000091811 | 780.739204  | -0.309961537 | 0.155822266 | -1.989194241 | 0.046679767 | 0.143815826 |
| ENSMUSG00000019214 | 2338.028819 | -0.309802368 | 0.130424024 | -2.375347403 | 0.01753244  | 0.06719212  |
| ENSMUSG00000027374 | 3349.819568 | -0.309576209 | 0.109249252 | -2.83366891  | 0.004601698 | 0.023170574 |
| ENSMUSG00000050379 | 1532.588003 | -0.309119435 | 0.146380761 | -2.111749058 | 0.034707979 | 0.114704006 |
| ENSMUSG00000071660 | 2506.956947 | -0.308962054 | 0.136026629 | -2.271335073 | 0.023126702 | 0.083681662 |
| ENSMUSG00000027883 | 6288.105941 | -0.30878197  | 0.111792234 | -2.762105718 | 0.005742988 | 0.027765355 |
| ENSMUSG00000001672 | 3161.155089 | -0.308543343 | 0.105534114 | -2.923636081 | 0.00345969  | 0.018400796 |
| ENSMUSG00000028882 | 2907.285252 | -0.308276863 | 0.129856753 | -2.373976371 | 0.017597677 | 0.067372667 |
| ENSMUSG00000031453 | 5016.160672 | -0.308117408 | 0.108629341 | -2.836410529 | 0.004562376 | 0.022993344 |
| ENSMUSG00000020315 | 44436.64148 | -0.307827541 | 0.129060791 | -2.385136023 | 0.017072807 | 0.065803781 |
| ENSMUSG00000032187 | 32762.05494 | -0.307673361 | 0.118035026 | -2.606627643 | 0.009143874 | 0.0404518   |
| ENSMUSG00000032754 | 396.2481992 | -0.307603969 | 0.15097467  | -2.037454157 | 0.041604551 | 0.131967441 |
| ENSMUSG00000034109 | 4434.445294 | -0.307182828 | 0.095992891 | -3.200058106 | 0.001373999 | 0.008621406 |
| ENSMUSG00000046658 | 1098.149398 | -0.306586438 | 0.129188339 | -2.373174236 | 0.017635942 | 0.067484412 |
| ENSMUSG00000040620 | 3919.139347 | -0.306487127 | 0.127207522 | -2.409347511 | 0.015981073 | 0.062536218 |
| ENSMUSG00000028488 | 1555.790976 | -0.306397768 | 0.124602006 | -2.459011525 | 0.013932015 | 0.056275649 |
| ENSMUSG00000025239 | 5174.316908 | -0.306250624 | 0.122033815 | -2.509555432 | 0.012088324 | 0.050238859 |
| ENSMUSG00000020430 | 5878.089999 | -0.306097152 | 0.116031221 | -2.638058514 | 0.008338219 | 0.037596164 |
| ENSMUSG00000026848 | 1838.631246 | -0.305981712 | 0.119783842 | -2.554448975 | 0.010635602 | 0.04551613  |
| ENSMUSG0000002396  | 860.0789177 | -0.305840342 | 0.155895118 | -1.961833996 | 0.049781814 | 0.150656024 |
| ENSMUSG00000018042 | 4855.546101 | -0.305694916 | 0.131674078 | -2.321602856 | 0.02025433  | 0.075206762 |
| ENSMUSG00000037526 | 1066.487135 | -0.305588077 | 0.113873528 | -2.683574323 | 0.007283978 | 0.033708238 |
| ENSMUSG00000022325 | 1141.433227 | -0.305395866 | 0.15084878  | -2.024516637 | 0.042917022 | 0.134886981 |
| ENSMUSG00000032834 | 2557.275254 | -0.304820609 | 0.139737563 | -2.181379178 | 0.029155382 | 0.100168569 |
| ENSMUSG00000020263 | 3706.726824 | -0.304813154 | 0.132880629 | -2.293887044 | 0.021796988 | 0.079818493 |
| ENSMUSG00000038485 | 2219.367694 | -0.304788951 | 0.117006626 | -2.604886251 | 0.009190477 | 0.040625732 |
| ENSMUSG00000037966 | 941.0325415 | -0.303687313 | 0.122042936 | -2.488364534 | 0.012833212 | 0.052589756 |

|                    |             |              |             |              |             |             |
|--------------------|-------------|--------------|-------------|--------------|-------------|-------------|
| ENSMUSG00000030031 | 848.0525256 | -0.303679719 | 0.130778329 | -2.322095114 | 0.020227815 | 0.075133327 |
| ENSMUSG00000040820 | 1302.139359 | -0.303582622 | 0.108933923 | -2.786851083 | 0.005322293 | 0.026103466 |
| ENSMUSG00000034274 | 3403.567055 | -0.303297643 | 0.112468236 | -2.696740477 | 0.007002182 | 0.032627592 |
| ENSMUSG00000061666 | 2181.379253 | -0.302855039 | 0.115238169 | -2.628079235 | 0.008586851 | 0.03849927  |
| ENSMUSG00000046432 | 991.0216847 | -0.302728941 | 0.136005645 | -2.2258557   | 0.026023849 | 0.091843305 |
| ENSMUSG00000000738 | 5482.06481  | -0.302653945 | 0.111532954 | -2.713583157 | 0.006655986 | 0.031308826 |
| ENSMUSG00000020898 | 4466.568851 | -0.302468537 | 0.1397076   | -2.165011332 | 0.030386817 | 0.103285538 |
| ENSMUSG00000041164 | 8805.108464 | -0.302366458 | 0.092421445 | -3.271604973 | 0.001069389 | 0.007037014 |
| ENSMUSG00000004462 | 1133.084432 | -0.302224156 | 0.138082356 | -2.188723919 | 0.028616912 | 0.09875979  |
| ENSMUSG00000078193 | 723.5102073 | -0.302135258 | 0.130689858 | -2.311849307 | 0.020785989 | 0.076835462 |
| ENSMUSG00000016619 | 6078.856338 | -0.301994556 | 0.133926655 | -2.254924959 | 0.024138039 | 0.086585558 |
| ENSMUSG00000001436 | 2983.926211 | -0.301924682 | 0.144344445 | -2.091695811 | 0.036465735 | 0.119345813 |
| ENSMUSG00000023972 | 1821.39311  | -0.30184684  | 0.115434576 | -2.614873715 | 0.008926045 | 0.039669138 |
| ENSMUSG00000029101 | 2676.985264 | -0.301366497 | 0.133198731 | -2.2625328   | 0.023664505 | 0.08522967  |
| ENSMUSG00000041870 | 8105.639485 | -0.301123267 | 0.108536882 | -2.774386578 | 0.005530592 | 0.026947285 |
| ENSMUSG00000038827 | 1316.042212 | -0.300725831 | 0.151290599 | -1.987736401 | 0.046840851 | 0.144201796 |
| ENSMUSG00000090035 | 4585.165536 | -0.300652508 | 0.118950259 | -2.527548162 | 0.011486207 | 0.048312693 |
| ENSMUSG00000028007 | 4443.133978 | -0.300495741 | 0.114960167 | -2.613911845 | 0.008951213 | 0.039755507 |
| ENSMUSG00000024816 | 1888.935026 | -0.300147944 | 0.125821618 | -2.385503765 | 0.017055748 | 0.065749392 |
| ENSMUSG00000040785 | 8008.496651 | -0.300091994 | 0.128528824 | -2.334822531 | 0.019552694 | 0.07308827  |
| ENSMUSG00000037339 | 3030.518494 | -0.299485907 | 0.09664871  | -3.09870568  | 0.00194368  | 0.011515943 |
| ENSMUSG00000024248 | 9970.386003 | -0.299112138 | 0.108125228 | -2.766349217 | 0.005668779 | 0.027472362 |
| ENSMUSG00000025228 | 5368.218014 | -0.298589444 | 0.108166872 | -2.760451881 | 0.005772146 | 0.02787893  |
| ENSMUSG00000047030 | 2488.732036 | -0.298335683 | 0.112652779 | -2.648276274 | 0.008090338 | 0.03667872  |
| ENSMUSG00000046312 | 2914.043642 | -0.29815396  | 0.129711344 | -2.298595861 | 0.021527899 | 0.079040776 |
| ENSMUSG00000021482 | 1990.627099 | -0.298114075 | 0.117503436 | -2.537066884 | 0.011178559 | 0.047322144 |
| ENSMUSG00000033216 | 2017.574776 | -0.298095141 | 0.10879629  | -2.73993848  | 0.006145069 | 0.02928856  |
| ENSMUSG00000028689 | 799.3370181 | -0.29805825  | 0.133428785 | -2.233837697 | 0.025493754 | 0.090401687 |
| ENSMUSG00000026202 | 5686.252833 | -0.297993006 | 0.130606214 | -2.281614315 | 0.022512121 | 0.081912678 |

|                    |             |              |             |              |             |             |
|--------------------|-------------|--------------|-------------|--------------|-------------|-------------|
| ENSMUSG00000066278 | 1300.309573 | -0.29790287  | 0.117045147 | -2.545196243 | 0.010921634 | 0.046508184 |
| ENSMUSG00000027957 | 5759.516245 | -0.297859218 | 0.099259588 | -3.000810539 | 0.00269262  | 0.015072321 |
| ENSMUSG00000015776 | 2208.435232 | -0.297108916 | 0.130839108 | -2.270795947 | 0.023159333 | 0.083761968 |
| ENSMUSG00000034121 | 943.2374097 | -0.297042432 | 0.133115683 | -2.231460827 | 0.02565062  | 0.090813536 |
| ENSMUSG00000081534 | 795.337168  | -0.296810752 | 0.1201313   | -2.470719547 | 0.013484152 | 0.054734269 |
| ENSMUSG00000027498 | 2237.998104 | -0.296432602 | 0.130949001 | -2.26372557  | 0.023590999 | 0.085019855 |
| ENSMUSG00000027300 | 805.9015813 | -0.296302321 | 0.123635795 | -2.396573905 | 0.016549156 | 0.064184821 |
| ENSMUSG00000020482 | 2474.161841 | -0.296064583 | 0.119232776 | -2.483080525 | 0.013025164 | 0.053268693 |
| ENSMUSG00000070738 | 8636.673139 | -0.295773673 | 0.105951805 | -2.791586918 | 0.005245027 | 0.025815348 |
| ENSMUSG00000026377 | 2635.368816 | -0.295616164 | 0.135745864 | -2.177717655 | 0.029427064 | 0.100915416 |
| ENSMUSG00000018921 | 3712.546962 | -0.295507772 | 0.123563172 | -2.391552167 | 0.0167773   | 0.064871779 |
| ENSMUSG00000037275 | 5620.256931 | -0.295301349 | 0.137336422 | -2.150204189 | 0.031539067 | 0.106487923 |
| ENSMUSG00000023921 | 2127.927939 | -0.294707589 | 0.147670703 | -1.995707894 | 0.045965727 | 0.142096158 |
| ENSMUSG00000054065 | 4304.980646 | -0.294405612 | 0.104792802 | -2.809406805 | 0.004963289 | 0.024708481 |
| ENSMUSG00000026664 | 4065.059459 | -0.294309571 | 0.102889561 | -2.860441494 | 0.004230516 | 0.02164124  |
| ENSMUSG00000026269 | 5833.389078 | -0.294147765 | 0.103264756 | -2.848481672 | 0.004392838 | 0.022309997 |
| ENSMUSG00000016933 | 3492.989065 | -0.293982606 | 0.122521614 | -2.399434658 | 0.01642041  | 0.063833726 |
| ENSMUSG00000059409 | 5035.947182 | -0.293977753 | 0.108282751 | -2.714908427 | 0.00662941  | 0.031216738 |
| ENSMUSG00000028495 | 40184.63947 | -0.293898234 | 0.117212343 | -2.507400055 | 0.012162297 | 0.050458791 |
| ENSMUSG00000024921 | 8943.006274 | -0.293862682 | 0.140477334 | -2.091886814 | 0.036448642 | 0.119313094 |
| ENSMUSG00000041168 | 10453.72892 | -0.293758937 | 0.095457295 | -3.077385952 | 0.002088247 | 0.0121911   |
| ENSMUSG00000040616 | 2158.398247 | -0.293520607 | 0.108397014 | -2.707829266 | 0.006772485 | 0.031796462 |
| ENSMUSG00000013593 | 18115.63358 | -0.293073291 | 0.10032687  | -2.921184426 | 0.003487033 | 0.01851091  |
| ENSMUSG00000026181 | 1066.617017 | -0.293033212 | 0.138729093 | -2.112269351 | 0.034663353 | 0.114622472 |
| ENSMUSG00000020460 | 44363.72428 | -0.292537604 | 0.115243189 | -2.538437261 | 0.011134877 | 0.047183142 |
| ENSMUSG00000040712 | 5065.808041 | -0.292267502 | 0.100706029 | -2.902184768 | 0.003705699 | 0.019408359 |
| ENSMUSG00000049728 | 1314.197631 | -0.291752788 | 0.113327807 | -2.574414834 | 0.01004098  | 0.043522624 |
| ENSMUSG00000044452 | 3598.400799 | -0.291607099 | 0.129036873 | -2.25987419  | 0.02382906  | 0.085725419 |
| ENSMUSG00000001420 | 1511.624022 | -0.291591719 | 0.121591175 | -2.398132252 | 0.016478914 | 0.063934632 |

|                    |             |              |             |              |             |             |
|--------------------|-------------|--------------|-------------|--------------|-------------|-------------|
| ENSMUSG00000021595 | 11601.92501 | -0.29149295  | 0.121510849 | -2.398904728 | 0.016444193 | 0.063855465 |
| ENSMUSG00000001909 | 6976.537141 | -0.291331808 | 0.102126182 | -2.852665219 | 0.004335427 | 0.022063979 |
| ENSMUSG00000039804 | 3580.908519 | -0.291286292 | 0.116172767 | -2.507354356 | 0.01216387  | 0.050458791 |
| ENSMUSG00000025371 | 2124.739071 | -0.291172612 | 0.102492483 | -2.840916742 | 0.004498405 | 0.022732595 |
| ENSMUSG00000030744 | 44808.33605 | -0.290929895 | 0.116884052 | -2.489046955 | 0.012808605 | 0.052516734 |
| ENSMUSG00000026135 | 2208.64451  | -0.290879861 | 0.125818344 | -2.311903421 | 0.020783006 | 0.076835462 |
| ENSMUSG00000033047 | 12697.46083 | -0.290574566 | 0.104781483 | -2.773148055 | 0.005551686 | 0.027018352 |
| ENSMUSG00000050410 | 1509.451908 | -0.290453867 | 0.135961021 | -2.136302482 | 0.032654767 | 0.109690308 |
| ENSMUSG00000020917 | 11989.87189 | -0.290278929 | 0.096021053 | -3.023075861 | 0.002502195 | 0.014169998 |
| ENSMUSG00000032527 | 3535.7603   | -0.290278495 | 0.136715142 | -2.123235878 | 0.033734091 | 0.112200442 |
| ENSMUSG00000032705 | 1662.889306 | -0.290271114 | 0.111468447 | -2.604065303 | 0.00921252  | 0.040665338 |
| ENSMUSG00000018405 | 1105.740013 | -0.290124549 | 0.126216852 | -2.298619746 | 0.021526541 | 0.079040776 |
| ENSMUSG00000020549 | 2952.98163  | -0.290058341 | 0.12033254  | -2.410473024 | 0.015931849 | 0.062365486 |
| ENSMUSG00000045237 | 634.7839523 | -0.289914758 | 0.140497336 | -2.063489363 | 0.039066157 | 0.125852207 |
| ENSMUSG00000029578 | 6148.671252 | -0.289835553 | 0.104953732 | -2.761555475 | 0.005752674 | 0.027798568 |
| ENSMUSG00000003344 | 4244.339057 | -0.289569742 | 0.122473381 | -2.364348404 | 0.018061818 | 0.068818827 |
| ENSMUSG00000021983 | 3643.294389 | -0.289546494 | 0.104427351 | -2.772707453 | 0.005559207 | 0.027026905 |
| ENSMUSG00000033589 | 3415.845951 | -0.289543277 | 0.097850299 | -2.95904337  | 0.003085957 | 0.016821512 |
| ENSMUSG00000042207 | 4931.943242 | -0.289534702 | 0.108936682 | -2.657825594 | 0.007864658 | 0.035845032 |
| ENSMUSG00000038279 | 6497.968895 | -0.289056579 | 0.146742066 | -1.969827646 | 0.048858127 | 0.148748818 |
| ENSMUSG00000019854 | 2002.680104 | -0.289022172 | 0.117309089 | -2.46376624  | 0.013748574 | 0.055696087 |
| ENSMUSG00000027618 | 2991.882304 | -0.288796714 | 0.104875217 | -2.75371743  | 0.005892262 | 0.028296931 |
| ENSMUSG00000020075 | 16724.54567 | -0.288780832 | 0.13556418  | -2.130214873 | 0.033153878 | 0.110849269 |
| ENSMUSG00000048429 | 2228.548472 | -0.288466674 | 0.113241084 | -2.547367649 | 0.010853902 | 0.046299323 |
| ENSMUSG00000029173 | 2329.79622  | -0.288254174 | 0.141790429 | -2.032959316 | 0.042056633 | 0.132904206 |
| ENSMUSG00000063334 | 2605.048006 | -0.287743569 | 0.14098564  | -2.040942384 | 0.041256554 | 0.131119056 |
| ENSMUSG00000035206 | 2562.209087 | -0.287583471 | 0.111992607 | -2.567879075 | 0.010232284 | 0.04417154  |
| ENSMUSG00000020755 | 2726.317825 | -0.287442316 | 0.102315053 | -2.809384435 | 0.004963634 | 0.024708481 |
| ENSMUSG00000016757 | 2056.790132 | -0.287331764 | 0.112831217 | -2.546562651 | 0.010878968 | 0.046379635 |



|                    |             |              |             |              |             |             |
|--------------------|-------------|--------------|-------------|--------------|-------------|-------------|
| ENSMUSG00000009863 | 9286.609657 | -0.287181755 | 0.09004474  | -3.189322947 | 0.001426065 | 0.008893364 |
| ENSMUSG00000015659 | 628.0079242 | -0.287153351 | 0.13007415  | -2.207612751 | 0.027271279 | 0.09525087  |
| ENSMUSG00000026578 | 667.646567  | -0.286823383 | 0.137466851 | -2.086491268 | 0.036934145 | 0.120296243 |
| ENSMUSG00000034194 | 1061.246114 | -0.286711172 | 0.140961581 | -2.033966767 | 0.041954946 | 0.132714504 |
| ENSMUSG00000056209 | 2257.863766 | -0.2866293   | 0.106685584 | -2.686673199 | 0.007216752 | 0.033417938 |
| ENSMUSG00000037355 | 1701.221477 | -0.286624881 | 0.121699189 | -2.355191386 | 0.018513168 | 0.070119252 |
| ENSMUSG00000024273 | 475.1872194 | -0.286520691 | 0.137413284 | -2.085101837 | 0.037060058 | 0.120495166 |
| ENSMUSG00000033257 | 6259.025038 | -0.286429277 | 0.132563133 | -2.160700865 | 0.030718454 | 0.104222158 |
| ENSMUSG00000031754 | 2972.854233 | -0.285934676 | 0.116853031 | -2.446959863 | 0.014406688 | 0.05775365  |
| ENSMUSG00000021975 | 2660.738778 | -0.285918337 | 0.135058002 | -2.117004045 | 0.034259504 | 0.113625998 |
| ENSMUSG00000067150 | 5821.708421 | -0.285843509 | 0.139080002 | -2.055245215 | 0.039855326 | 0.127721458 |
| ENSMUSG00000022895 | 20133.86786 | -0.285794103 | 0.104607153 | -2.732070381 | 0.006293769 | 0.029901439 |
| ENSMUSG00000028405 | 6805.643115 | -0.285778729 | 0.116381664 | -2.455530522 | 0.014067681 | 0.056700406 |
| ENSMUSG00000040725 | 22910.15742 | -0.285573434 | 0.091365166 | -3.125627054 | 0.001774264 | 0.010650163 |
| ENSMUSG00000041815 | 6574.998646 | -0.285193598 | 0.112063754 | -2.544922767 | 0.010930191 | 0.046535737 |
| ENSMUSG00000027628 | 1303.969192 | -0.284930122 | 0.129698079 | -2.196872343 | 0.028029565 | 0.097214202 |
| ENSMUSG00000052337 | 11654.52089 | -0.283986892 | 0.113731718 | -2.496989366 | 0.012525271 | 0.051564718 |
| ENSMUSG00000037415 | 3362.436246 | -0.283856228 | 0.102351887 | -2.773336539 | 0.005548471 | 0.027015798 |
| ENSMUSG00000068740 | 3063.524983 | -0.283670761 | 0.114436723 | -2.478843805 | 0.013180901 | 0.053757732 |
| ENSMUSG00000015697 | 6794.284612 | -0.283177696 | 0.107797696 | -2.626936456 | 0.008615742 | 0.038582262 |
| ENSMUSG00000011114 | 5349.678047 | -0.28316111  | 0.094600796 | -2.993221204 | 0.002760496 | 0.015371241 |
| ENSMUSG00000029103 | 3255.123379 | -0.283049399 | 0.112450155 | -2.517109907 | 0.011832191 | 0.049423056 |
| ENSMUSG00000030738 | 28399.54332 | -0.282982444 | 0.117647564 | -2.405340443 | 0.016157406 | 0.063060257 |
| ENSMUSG00000071477 | 2283.161489 | -0.282624923 | 0.11561451  | -2.444545444 | 0.014503481 | 0.058079031 |
| ENSMUSG00000041133 | 14389.78423 | -0.282589359 | 0.122263899 | -2.311306619 | 0.020815925 | 0.076933367 |
| ENSMUSG00000032782 | 3281.887684 | -0.282492377 | 0.117031289 | -2.413819242 | 0.015786292 | 0.061958834 |
| ENSMUSG00000038780 | 2437.751659 | -0.282434668 | 0.101462339 | -2.783640412 | 0.005375259 | 0.026328668 |
| ENSMUSG00000027170 | 6485.139919 | -0.28214288  | 0.103683966 | -2.72118141  | 0.006504905 | 0.030706722 |
| ENSMUSG00000088185 | 54542.82391 | -0.282080548 | 0.120760024 | -2.335876887 | 0.019497659 | 0.07290699  |

|                    |             |              |             |              |             |             |
|--------------------|-------------|--------------|-------------|--------------|-------------|-------------|
| ENSMUSG00000048277 | 5987.230178 | -0.281998398 | 0.123772104 | -2.27836798  | 0.022704663 | 0.082389493 |
| ENSMUSG00000027889 | 6215.491491 | -0.281826139 | 0.110682129 | -2.546265971 | 0.010888219 | 0.04641016  |
| ENSMUSG00000040383 | 6817.252039 | -0.281699071 | 0.117180524 | -2.403975172 | 0.016217875 | 0.063207764 |
| ENSMUSG00000025077 | 1871.235495 | -0.281667652 | 0.133317433 | -2.112759341 | 0.034621371 | 0.114519609 |
| ENSMUSG00000074918 | 1800.656289 | -0.281210845 | 0.14208295  | -1.979201898 | 0.047793279 | 0.146246765 |
| ENSMUSG00000061838 | 8806.594439 | -0.280671313 | 0.101417511 | -2.767483745 | 0.005649086 | 0.027392971 |
| ENSMUSG00000071281 | 733.6501134 | -0.280623711 | 0.136144158 | -2.061224768 | 0.039281602 | 0.126336746 |
| ENSMUSG00000042377 | 3330.021143 | -0.280471477 | 0.11983841  | -2.340413874 | 0.019262381 | 0.072366973 |
| ENSMUSG00000040532 | 5241.865667 | -0.280378378 | 0.10009865  | -2.801020588 | 0.005094127 | 0.025217342 |
| ENSMUSG00000048327 | 2789.56006  | -0.280344184 | 0.132239871 | -2.119967168 | 0.034008814 | 0.112950807 |
| ENSMUSG00000028906 | 11330.56849 | -0.280264115 | 0.10702756  | -2.618616312 | 0.008828719 | 0.039330655 |
| ENSMUSG00000045128 | 58689.58297 | -0.279882917 | 0.123516087 | -2.265963283 | 0.023453631 | 0.084653334 |
| ENSMUSG00000018428 | 6861.751824 | -0.279672035 | 0.122736738 | -2.278633439 | 0.022688864 | 0.082367633 |
| ENSMUSG00000030811 | 5284.72731  | -0.279288528 | 0.096185576 | -2.90364251  | 0.003688491 | 0.019331852 |
| ENSMUSG00000047824 | 2751.454857 | -0.279158321 | 0.122386494 | -2.280956928 | 0.022550996 | 0.082027362 |
| ENSMUSG00000003868 | 6029.598134 | -0.279144996 | 0.105317025 | -2.650521095 | 0.008036771 | 0.036480364 |
| ENSMUSG00000031562 | 1608.52241  | -0.27900788  | 0.117448265 | -2.37558112  | 0.017521341 | 0.067161124 |
| ENSMUSG00000034127 | 9108.453674 | -0.27883335  | 0.125345364 | -2.224520643 | 0.026113435 | 0.092086609 |
| ENSMUSG00000024247 | 3205.520548 | -0.278690986 | 0.126307152 | -2.206454513 | 0.027352192 | 0.095384086 |
| ENSMUSG00000063052 | 1671.655083 | -0.278474345 | 0.130550231 | -2.133081978 | 0.032918002 | 0.110308694 |
| ENSMUSG00000033526 | 5654.41623  | -0.278343178 | 0.104119601 | -2.673302388 | 0.007510851 | 0.034550226 |
| ENSMUSG00000041037 | 1633.494322 | -0.278009103 | 0.108335066 | -2.566196842 | 0.010282046 | 0.044326292 |
| ENSMUSG00000025453 | 7023.542007 | -0.277944233 | 0.118581884 | -2.343901317 | 0.01908322  | 0.071851238 |
| ENSMUSG00000050947 | 1021.616446 | -0.27746155  | 0.13956961  | -1.98797969  | 0.046813936 | 0.144138837 |
| ENSMUSG00000038256 | 4809.650696 | -0.277444311 | 0.095818714 | -2.895512779 | 0.003785396 | 0.019734433 |
| ENSMUSG00000046185 | 1175.183031 | -0.277137414 | 0.140093556 | -1.978230991 | 0.047902654 | 0.146479787 |
| ENSMUSG00000005609 | 5248.115391 | -0.277015744 | 0.115197108 | -2.404710925 | 0.016185263 | 0.06312479  |
| ENSMUSG00000024740 | 24844.52153 | -0.276802411 | 0.109901289 | -2.518645713 | 0.011780713 | 0.049254157 |
| ENSMUSG00000022680 | 13206.43454 | -0.276062311 | 0.112213388 | -2.46015485  | 0.013887708 | 0.056106844 |

|                    |             |              |             |              |             |             |
|--------------------|-------------|--------------|-------------|--------------|-------------|-------------|
| ENSMUSG00000028973 | 3657.804479 | -0.276015263 | 0.113958336 | -2.422071721 | 0.015432304 | 0.060928237 |
| ENSMUSG00000021039 | 5249.644005 | -0.275830449 | 0.101070454 | -2.729090826 | 0.006350921 | 0.030121626 |
| ENSMUSG00000030816 | 8084.190289 | -0.275720986 | 0.096516002 | -2.856738578 | 0.004280182 | 0.021832649 |
| ENSMUSG00000000811 | 1000.928443 | -0.275552755 | 0.122271559 | -2.253612835 | 0.024220535 | 0.086825616 |
| ENSMUSG00000013150 | 1365.530027 | -0.275415226 | 0.138670168 | -1.986117345 | 0.047020296 | 0.144604213 |
| ENSMUSG00000031730 | 1536.695406 | -0.27477948  | 0.112090643 | -2.451404261 | 0.014230004 | 0.057240857 |
| ENSMUSG00000014748 | 2823.865403 | -0.274675936 | 0.113330915 | -2.423662913 | 0.01536486  | 0.060689292 |
| ENSMUSG00000018040 | 3731.569293 | -0.274472728 | 0.105387401 | -2.604416896 | 0.009203074 | 0.040665338 |
| ENSMUSG00000026932 | 2160.128556 | -0.274197705 | 0.124817136 | -2.196795361 | 0.028035065 | 0.097218158 |
| ENSMUSG00000023072 | 3549.723711 | -0.273909612 | 0.108865479 | -2.516037363 | 0.01186826  | 0.049536602 |
| ENSMUSG00000024006 | 6388.684118 | -0.273824541 | 0.121350698 | -2.256472738 | 0.024041041 | 0.086320923 |
| ENSMUSG00000038533 | 2947.448494 | -0.273600262 | 0.113497269 | -2.410632996 | 0.015924864 | 0.062360034 |
| ENSMUSG00000008999 | 1378.991594 | -0.273592428 | 0.125011027 | -2.188546354 | 0.028629829 | 0.09878436  |
| ENSMUSG00000022671 | 903.0783776 | -0.273585678 | 0.115592167 | -2.366818477 | 0.01794173  | 0.068443128 |
| ENSMUSG00000018661 | 5144.041667 | -0.273470328 | 0.096693502 | -2.82821826  | 0.004680788 | 0.023494544 |
| ENSMUSG00000024359 | 27765.77006 | -0.273448376 | 0.121935797 | -2.242560296 | 0.024925183 | 0.088823347 |
| ENSMUSG00000032737 | 10620.73534 | -0.273329399 | 0.098028771 | -2.788256903 | 0.00529925  | 0.026024663 |
| ENSMUSG00000053293 | 7670.349232 | -0.273243036 | 0.113469305 | -2.408078882 | 0.016036716 | 0.062687957 |
| ENSMUSG00000056692 | 7125.925695 | -0.272816214 | 0.111717056 | -2.442028315 | 0.014605001 | 0.058374481 |
| ENSMUSG00000018932 | 4163.664049 | -0.272300315 | 0.095196443 | -2.860404293 | 0.004231012 | 0.02164124  |
| ENSMUSG00000033961 | 790.5670654 | -0.272200296 | 0.134075591 | -2.030200223 | 0.042336191 | 0.133489816 |
| ENSMUSG00000024580 | 2774.316241 | -0.272022469 | 0.104541766 | -2.602045866 | 0.009266946 | 0.040850397 |
| ENSMUSG00000039231 | 3986.262089 | -0.271927703 | 0.122636933 | -2.217339401 | 0.026599907 | 0.093565384 |
| ENSMUSG00000027367 | 9717.161497 | -0.27182787  | 0.101330294 | -2.682592345 | 0.007305398 | 0.033800349 |
| ENSMUSG00000056076 | 27533.62989 | -0.271268093 | 0.120448333 | -2.252153155 | 0.024312595 | 0.086987836 |
| ENSMUSG00000017858 | 1863.716337 | -0.271200593 | 0.122712247 | -2.210053195 | 0.027101471 | 0.094878822 |
| ENSMUSG00000009621 | 4311.182338 | -0.27081258  | 0.096472186 | -2.807157069 | 0.004998086 | 0.024819865 |
| ENSMUSG00000060679 | 3109.856098 | -0.270338534 | 0.109752393 | -2.463167568 | 0.013771554 | 0.055770458 |
| ENSMUSG00000014426 | 6839.267105 | -0.270224638 | 0.112615515 | -2.399532935 | 0.016416003 | 0.063833726 |

|                    |             |              |             |              |             |             |
|--------------------|-------------|--------------|-------------|--------------|-------------|-------------|
| ENSMUSG00000043140 | 1687.715057 | -0.270075688 | 0.128434365 | -2.10283041  | 0.035480597 | 0.11663514  |
| ENSMUSG00000058291 | 1464.114641 | -0.270048947 | 0.130739544 | -2.065549102 | 0.038871075 | 0.125341792 |
| ENSMUSG00000027487 | 878.2071338 | -0.269822607 | 0.121289585 | -2.224614801 | 0.026107108 | 0.092078858 |
| ENSMUSG00000018481 | 5450.291369 | -0.269418914 | 0.108872107 | -2.474636731 | 0.013337176 | 0.054247688 |
| ENSMUSG00000031887 | 1297.075962 | -0.269417511 | 0.115790879 | -2.326759346 | 0.019978077 | 0.074366734 |
| ENSMUSG00000019143 | 2181.306607 | -0.269256562 | 0.11886802  | -2.265172436 | 0.0235021   | 0.084763099 |
| ENSMUSG00000026127 | 3752.380952 | -0.269171817 | 0.108002472 | -2.492274596 | 0.012692787 | 0.052138853 |
| ENSMUSG00000024271 | 3954.210841 | -0.268563807 | 0.102273345 | -2.625941369 | 0.00864097  | 0.038656424 |
| ENSMUSG00000068284 | 6196.243442 | -0.268509624 | 0.126130798 | -2.128818884 | 0.033269248 | 0.111109309 |
| ENSMUSG00000033009 | 1700.405123 | -0.268484882 | 0.136668091 | -1.964503061 | 0.049471782 | 0.149982355 |
| ENSMUSG00000025821 | 3407.35237  | -0.268089322 | 0.108130186 | -2.479319887 | 0.013163319 | 0.053695845 |
| ENSMUSG00000017999 | 5682.540205 | -0.267980003 | 0.106228487 | -2.522675509 | 0.011646582 | 0.048793991 |
| ENSMUSG00000065979 | 4014.787381 | -0.267853418 | 0.107235703 | -2.49780074  | 0.012496642 | 0.05148487  |
| ENSMUSG00000024579 | 927.0754866 | -0.267801403 | 0.118735849 | -2.255438485 | 0.024105819 | 0.086525652 |
| ENSMUSG00000041346 | 1376.348417 | -0.267700245 | 0.10838284  | -2.469950459 | 0.013513176 | 0.054802209 |
| ENSMUSG00000037070 | 3259.613116 | -0.26765419  | 0.134354288 | -1.992152193 | 0.046354362 | 0.142991337 |
| ENSMUSG00000001089 | 6453.624625 | -0.26756729  | 0.136069678 | -1.966399084 | 0.049252529 | 0.149541273 |
| ENSMUSG00000029036 | 12582.85466 | -0.267371675 | 0.106917994 | -2.500717293 | 0.012394207 | 0.051147894 |
| ENSMUSG00000052934 | 1851.404843 | -0.267334644 | 0.124146343 | -2.153383154 | 0.031288578 | 0.105786323 |
| ENSMUSG00000068394 | 4166.473313 | -0.26724034  | 0.121725873 | -2.195427597 | 0.028132939 | 0.097466627 |
| ENSMUSG00000030942 | 3873.281241 | -0.267078064 | 0.128804608 | -2.073513273 | 0.038124537 | 0.123344742 |
| ENSMUSG00000031388 | 1689.894783 | -0.266538233 | 0.135177556 | -1.971763966 | 0.048636558 | 0.148155152 |
| ENSMUSG00000059070 | 48347.15909 | -0.266270847 | 0.119827679 | -2.222114691 | 0.026275556 | 0.092570485 |
| ENSMUSG00000030884 | 13150.20667 | -0.266090047 | 0.108813845 | -2.445369404 | 0.014470384 | 0.05797773  |
| ENSMUSG00000033365 | 2279.85341  | -0.265944909 | 0.125141756 | -2.125149244 | 0.033574162 | 0.111866406 |
| ENSMUSG00000025645 | 900.6015273 | -0.265538712 | 0.127059203 | -2.089881767 | 0.036628422 | 0.11956571  |
| ENSMUSG00000020802 | 2098.364141 | -0.265304042 | 0.111658021 | -2.37604106  | 0.017499515 | 0.067112071 |
| ENSMUSG00000031328 | 4441.100321 | -0.265150754 | 0.116108466 | -2.283647035 | 0.022392283 | 0.081583125 |
| ENSMUSG00000003134 | 1640.268172 | -0.264976859 | 0.113633698 | -2.331851053 | 0.019708528 | 0.073584445 |

|                    |             |              |             |              |             |             |
|--------------------|-------------|--------------|-------------|--------------|-------------|-------------|
| ENSMUSG00000075227 | 1076.834343 | -0.264903974 | 0.110450616 | -2.398392907 | 0.016467191 | 0.063900266 |
| ENSMUSG00000005299 | 6801.834363 | -0.264837415 | 0.098983039 | -2.675583796 | 0.007459922 | 0.03437267  |
| ENSMUSG00000042015 | 1675.787616 | -0.264629498 | 0.120084157 | -2.203700346 | 0.027545425 | 0.095892994 |
| ENSMUSG00000038141 | 1378.246528 | -0.264609603 | 0.115837898 | -2.284309433 | 0.022353352 | 0.081481219 |
| ENSMUSG00000001034 | 1173.160815 | -0.264468352 | 0.132425719 | -1.997107167 | 0.045813543 | 0.141817877 |
| ENSMUSG00000029319 | 4108.784882 | -0.26420723  | 0.122242644 | -2.161334385 | 0.030669519 | 0.104135343 |
| ENSMUSG00000032178 | 8978.58145  | -0.264161737 | 0.10058075  | -2.626364756 | 0.008630228 | 0.038639373 |
| ENSMUSG00000058979 | 1193.848959 | -0.263945195 | 0.118287468 | -2.231387641 | 0.025655463 | 0.090816266 |
| ENSMUSG00000024824 | 1277.369382 | -0.26384755  | 0.117690461 | -2.241877097 | 0.024969317 | 0.088960864 |
| ENSMUSG00000027425 | 3956.656664 | -0.263738225 | 0.13063876  | -2.018835951 | 0.043504273 | 0.136281612 |
| ENSMUSG00000005683 | 18386.17512 | -0.263726703 | 0.100308602 | -2.629153398 | 0.008559774 | 0.03840103  |
| ENSMUSG00000034659 | 1334.881893 | -0.262807035 | 0.118538736 | -2.217056168 | 0.026619254 | 0.093603906 |
| ENSMUSG00000020547 | 8006.892872 | -0.262601857 | 0.120471968 | -2.17977561  | 0.029274099 | 0.100483558 |
| ENSMUSG00000029345 | 3452.618343 | -0.262439539 | 0.102683372 | -2.555813399 | 0.010593991 | 0.045372883 |
| ENSMUSG00000029577 | 8613.912696 | -0.262383283 | 0.104427449 | -2.512589223 | 0.011984879 | 0.04991126  |
| ENSMUSG00000026566 | 3956.061853 | -0.262278    | 0.101593    | -2.581654247 | 0.009832804 | 0.042786607 |
| ENSMUSG00000027076 | 1148.039263 | -0.262183039 | 0.129418326 | -2.025857138 | 0.042779427 | 0.134597065 |
| ENSMUSG00000028085 | 1333.605351 | -0.262164687 | 0.125973434 | -2.081110912 | 0.037423755 | 0.121482848 |
| ENSMUSG00000021948 | 6172.773477 | -0.262159868 | 0.11496561  | -2.280332953 | 0.022587949 | 0.082108206 |
| ENSMUSG00000048445 | 1235.835678 | -0.261993925 | 0.130018136 | -2.015056767 | 0.043898701 | 0.137208822 |
| ENSMUSG00000028106 | 6829.909867 | -0.26169752  | 0.110761323 | -2.362715733 | 0.018141579 | 0.069048119 |
| ENSMUSG00000030610 | 783.8931644 | -0.261479728 | 0.125204399 | -2.088422858 | 0.036759707 | 0.119955843 |
| ENSMUSG00000026275 | 2960.681818 | -0.261343125 | 0.132753695 | -1.968631646 | 0.048995406 | 0.148937758 |
| ENSMUSG00000025736 | 1573.118161 | -0.261240129 | 0.131569434 | -1.985568547 | 0.047081252 | 0.144697324 |
| ENSMUSG00000024127 | 2411.286671 | -0.260881588 | 0.114504814 | -2.278346029 | 0.022705969 | 0.082389493 |
| ENSMUSG00000038459 | 4059.437397 | -0.26067075  | 0.11025404  | -2.364273905 | 0.018065451 | 0.068820911 |
| ENSMUSG00000046761 | 4009.309206 | -0.260263285 | 0.106583136 | -2.441880541 | 0.01461098  | 0.058383708 |
| ENSMUSG00000032077 | 1278.545235 | -0.260028754 | 0.1203131   | -2.16126718  | 0.030674707 | 0.104137103 |
| ENSMUSG00000032078 | 4002.424518 | -0.259836632 | 0.109956506 | -2.363085561 | 0.018123485 | 0.069018414 |

|                    |             |              |             |              |             |             |
|--------------------|-------------|--------------|-------------|--------------|-------------|-------------|
| ENSMUSG00000026197 | 965.4553878 | -0.259109948 | 0.131622179 | -1.96858881  | 0.049000329 | 0.148937758 |
| ENSMUSG00000043183 | 3109.499458 | -0.258814403 | 0.102193115 | -2.532601181 | 0.011321969 | 0.047802201 |
| ENSMUSG00000004895 | 4054.335033 | -0.25878503  | 0.107356173 | -2.410527724 | 0.015929461 | 0.062365486 |
| ENSMUSG00000030189 | 14286.05469 | -0.258688194 | 0.113811214 | -2.272958749 | 0.023028666 | 0.083387309 |
| ENSMUSG00000005936 | 2422.449747 | -0.258604076 | 0.114858113 | -2.251509013 | 0.024353317 | 0.087119557 |
| ENSMUSG00000031774 | 2330.321367 | -0.258583278 | 0.105053465 | -2.461444546 | 0.013837879 | 0.055953512 |
| ENSMUSG00000027610 | 4397.870609 | -0.258244188 | 0.116566411 | -2.215425408 | 0.026730879 | 0.093907582 |
| ENSMUSG00000015942 | 1577.704213 | -0.258192578 | 0.119193492 | -2.166163385 | 0.030298704 | 0.10303315  |
| ENSMUSG00000041926 | 13342.47078 | -0.257654414 | 0.09977031  | -2.58247584  | 0.009809423 | 0.042701531 |
| ENSMUSG00000060206 | 5244.296984 | -0.257632305 | 0.12474925  | -2.065201239 | 0.038903963 | 0.125429707 |
| ENSMUSG00000021494 | 4002.285349 | -0.257536104 | 0.0974497   | -2.642759344 | 0.008223346 | 0.037183463 |
| ENSMUSG00000013822 | 2432.9481   | -0.257430229 | 0.108592307 | -2.370612031 | 0.017758661 | 0.067849221 |
| ENSMUSG00000070462 | 7111.739402 | -0.257346405 | 0.101827772 | -2.527271279 | 0.011495267 | 0.04832346  |
| ENSMUSG00000028333 | 18677.40849 | -0.257171424 | 0.106312074 | -2.419023674 | 0.015562227 | 0.061284343 |
| ENSMUSG00000070871 | 1675.847993 | -0.256914206 | 0.108314755 | -2.371922509 | 0.017695802 | 0.067643824 |
| ENSMUSG00000079020 | 1429.452625 | -0.256773152 | 0.111281649 | -2.307416837 | 0.021031593 | 0.077550524 |
| ENSMUSG00000050148 | 3073.781667 | -0.256767551 | 0.105785764 | -2.427241077 | 0.015214142 | 0.060200601 |
| ENSMUSG00000021555 | 3648.865737 | -0.25671478  | 0.105544691 | -2.432285103 | 0.015003892 | 0.059569484 |
| ENSMUSG00000000399 | 4881.148136 | -0.256279621 | 0.117785528 | -2.175815864 | 0.029569032 | 0.101153395 |
| ENSMUSG00000034300 | 2875.717421 | -0.256238157 | 0.108604232 | -2.359375426 | 0.018305726 | 0.069498807 |
| ENSMUSG00000038900 | 83432.56396 | -0.255978192 | 0.119520173 | -2.141715377 | 0.032216393 | 0.108364671 |
| ENSMUSG00000015750 | 2543.118382 | -0.255904999 | 0.115704145 | -2.211718514 | 0.02698612  | 0.094610513 |
| ENSMUSG00000029434 | 2671.37557  | -0.255734722 | 0.11078067  | -2.308477855 | 0.020972573 | 0.077384076 |
| ENSMUSG00000015806 | 4354.577312 | -0.255394829 | 0.106962801 | -2.387697654 | 0.016954283 | 0.06543743  |
| ENSMUSG00000027506 | 11723.92277 | -0.25525947  | 0.106607413 | -2.394387632 | 0.016648144 | 0.064477676 |
| ENSMUSG00000044393 | 13148.28308 | -0.255065308 | 0.108394338 | -2.353123902 | 0.01861643  | 0.070401862 |
| ENSMUSG00000039523 | 2693.39345  | -0.254890199 | 0.102940561 | -2.476091022 | 0.013282971 | 0.054094875 |
| ENSMUSG00000004207 | 15003.43024 | -0.25456538  | 0.103081123 | -2.469563501 | 0.013527801 | 0.054851542 |
| ENSMUSG00000030983 | 3332.481405 | -0.254499596 | 0.114837636 | -2.216168877 | 0.026679939 | 0.093758164 |

|                     |             |              |             |              |             |             |
|---------------------|-------------|--------------|-------------|--------------|-------------|-------------|
| ENSMUSG00000038241  | 8222.676726 | -0.25424441  | 0.108811812 | -2.336551565 | 0.019462513 | 0.072859663 |
| ENSMUSG00000028902  | 5027.159084 | -0.254233715 | 0.118516771 | -2.145128597 | 0.031942567 | 0.107687253 |
| ENSMUSG00000001285  | 1375.482502 | -0.253761998 | 0.122079556 | -2.078660877 | 0.037648531 | 0.122088105 |
| ENSMUSG000000061477 | 45117.8084  | -0.253695351 | 0.10702303  | -2.370474382 | 0.017765275 | 0.067851241 |
| ENSMUSG00000002812  | 9403.623704 | -0.25360259  | 0.094302892 | -2.689234495 | 0.007161609 | 0.033222257 |
| ENSMUSG00000025134  | 6549.35532  | -0.253550233 | 0.104588814 | -2.424257664 | 0.015339717 | 0.060611453 |
| ENSMUSG00000020250  | 12456.35925 | -0.252858422 | 0.107339637 | -2.355685464 | 0.018488565 | 0.070061766 |
| ENSMUSG00000022131  | 1058.945712 | -0.252783719 | 0.11919514  | -2.120755251 | 0.033942404 | 0.112792365 |
| ENSMUSG00000056131  | 2225.481685 | -0.252625427 | 0.118850261 | -2.125577382 | 0.033538465 | 0.111799895 |
| ENSMUSG00000079109  | 1229.806926 | -0.252560346 | 0.118182161 | -2.137042883 | 0.032594504 | 0.109525436 |
| ENSMUSG00000040054  | 11759.01194 | -0.252494446 | 0.115981706 | -2.177019583 | 0.029479106 | 0.100969675 |
| ENSMUSG00000056770  | 5620.25668  | -0.252305393 | 0.101627598 | -2.482646428 | 0.013041046 | 0.053323865 |
| ENSMUSG00000035469  | 6232.371703 | -0.251903688 | 0.119354212 | -2.110555505 | 0.034810536 | 0.114991817 |
| ENSMUSG00000040521  | 2131.596456 | -0.251684002 | 0.113223528 | -2.222894893 | 0.026222888 | 0.092414133 |
| ENSMUSG00000029028  | 4648.490892 | -0.251668697 | 0.121812442 | -2.066034415 | 0.03882523  | 0.125248294 |
| ENSMUSG00000019952  | 2480.834081 | -0.251516504 | 0.1229322   | -2.045977404 | 0.040758594 | 0.129850376 |
| ENSMUSG00000023015  | 7712.036128 | -0.251505996 | 0.126820272 | -1.983168713 | 0.047348587 | 0.145310732 |
| ENSMUSG00000025241  | 4882.180669 | -0.251502104 | 0.124704507 | -2.016784402 | 0.043718017 | 0.136796329 |
| ENSMUSG00000029034  | 2761.416631 | -0.251434759 | 0.119102513 | -2.11107853  | 0.034765563 | 0.114877287 |
| ENSMUSG00000020776  | 3306.194359 | -0.251180082 | 0.114600339 | -2.191791793 | 0.028394544 | 0.09822037  |
| ENSMUSG00000014547  | 832.6963789 | -0.251049331 | 0.124394211 | -2.018175347 | 0.043573003 | 0.136461565 |
| ENSMUSG00000021868  | 5284.967709 | -0.250723528 | 0.127337567 | -1.968967475 | 0.048956826 | 0.148907957 |
| ENSMUSG00000068039  | 17730.6677  | -0.250712544 | 0.122163101 | -2.052277185 | 0.040142732 | 0.128439464 |
| ENSMUSG00000053870  | 662.8000309 | -0.250102757 | 0.126880247 | -1.971171735 | 0.048704236 | 0.148300541 |
| ENSMUSG00000032314  | 5894.687611 | -0.250001254 | 0.122082884 | -2.047799383 | 0.040579661 | 0.129447435 |
| ENSMUSG00000031833  | 2641.571465 | -0.249968539 | 0.102112446 | -2.447973271 | 0.014366231 | 0.057653648 |
| ENSMUSG00000024769  | 9103.933681 | -0.249727043 | 0.103884276 | -2.403896454 | 0.016221367 | 0.063210329 |
| ENSMUSG00000028772  | 1751.154013 | -0.249713499 | 0.123850115 | -2.016255685 | 0.043773246 | 0.136931851 |
| ENSMUSG00000042272  | 6273.897493 | -0.249364161 | 0.121658907 | -2.049699168 | 0.040393796 | 0.128983684 |

|                    |             |              |             |              |             |             |
|--------------------|-------------|--------------|-------------|--------------|-------------|-------------|
| ENSMUSG00000030986 | 6171.957874 | -0.249261603 | 0.097020092 | -2.569175081 | 0.010194094 | 0.044032247 |
| ENSMUSG00000024900 | 8523.644298 | -0.248855759 | 0.10260989  | -2.425260942 | 0.015297387 | 0.060497788 |
| ENSMUSG00000025857 | 2031.478235 | -0.248717661 | 0.114093777 | -2.179940641 | 0.029261862 | 0.100457017 |
| ENSMUSG00000027649 | 2657.186848 | -0.248628952 | 0.105234852 | -2.36261037  | 0.018146737 | 0.069048119 |
| ENSMUSG00000022972 | 1377.961574 | -0.248206538 | 0.118952934 | -2.086594492 | 0.036924806 | 0.12028339  |
| ENSMUSG00000025574 | 3802.399002 | -0.248202423 | 0.099585222 | -2.492362004 | 0.012689663 | 0.052135625 |
| ENSMUSG00000028565 | 7308.291705 | -0.247903784 | 0.099299993 | -2.49651362  | 0.012542085 | 0.051614881 |
| ENSMUSG00000063652 | 1177.33901  | -0.247435622 | 0.118618164 | -2.085984252 | 0.03698005  | 0.120349061 |
| ENSMUSG00000052534 | 4757.840732 | -0.246858872 | 0.124814993 | -1.977798229 | 0.047951473 | 0.146557379 |
| ENSMUSG00000016181 | 2052.977085 | -0.246713261 | 0.12188166  | -2.02420333  | 0.042949235 | 0.134959968 |
| ENSMUSG00000042148 | 1929.024941 | -0.246581886 | 0.120921546 | -2.039188995 | 0.041431169 | 0.131524056 |
| ENSMUSG00000023118 | 14609.42711 | -0.246441089 | 0.096485385 | -2.554180494 | 0.010643807 | 0.045533767 |
| ENSMUSG00000003970 | 67909.91039 | -0.246352269 | 0.103407884 | -2.382335463 | 0.017203218 | 0.066203445 |
| ENSMUSG00000024974 | 7987.915308 | -0.246252659 | 0.114113693 | -2.157958899 | 0.030931028 | 0.104831739 |
| ENSMUSG00000034292 | 1341.320053 | -0.24624027  | 0.122812645 | -2.005007456 | 0.04496225  | 0.139808022 |
| ENSMUSG00000025195 | 15472.11057 | -0.24572657  | 0.113326133 | -2.168313377 | 0.030134851 | 0.102648132 |
| ENSMUSG00000005698 | 7325.970586 | -0.245711969 | 0.09387902  | -2.617325656 | 0.008862175 | 0.039456051 |
| ENSMUSG00000061410 | 5078.194972 | -0.245589065 | 0.120260822 | -2.042136927 | 0.041137951 | 0.130858635 |
| ENSMUSG00000036986 | 3302.817423 | -0.24558477  | 0.107906918 | -2.275894586 | 0.02285232  | 0.082866598 |
| ENSMUSG00000021668 | 904.9693978 | -0.245471314 | 0.125234591 | -1.960091949 | 0.049985044 | 0.151045592 |
| ENSMUSG00000020929 | 8103.714368 | -0.245200491 | 0.104949312 | -2.336370626 | 0.019471934 | 0.072859663 |
| ENSMUSG00000009640 | 1319.271413 | -0.245093723 | 0.123732947 | -1.980828299 | 0.047610532 | 0.145866531 |
| ENSMUSG00000020541 | 2205.93108  | -0.244703119 | 0.107217286 | -2.282310331 | 0.022471025 | 0.081809094 |
| ENSMUSG00000035772 | 2408.076646 | -0.244591939 | 0.11528204  | -2.121682946 | 0.033864372 | 0.112566605 |
| ENSMUSG00000017756 | 14032.95994 | -0.24440747  | 0.095576438 | -2.557193754 | 0.010552043 | 0.045245357 |
| ENSMUSG00000052533 | 5708.572736 | -0.244291414 | 0.118933907 | -2.054009841 | 0.039974739 | 0.128010388 |
| ENSMUSG00000003190 | 1196.130014 | -0.244240177 | 0.110485006 | -2.210618302 | 0.02706228  | 0.094773377 |
| ENSMUSG00000019947 | 12430.48564 | -0.243995348 | 0.102513511 | -2.380128691 | 0.017306593 | 0.066528837 |
| ENSMUSG00000003813 | 5749.936122 | -0.24391449  | 0.119086525 | -2.048212334 | 0.040539198 | 0.129375657 |



|                     |             |              |             |              |             |             |
|---------------------|-------------|--------------|-------------|--------------|-------------|-------------|
| ENSMUSG00000003037  | 4123.373998 | -0.243597527 | 0.111950293 | -2.175943638 | 0.029559475 | 0.101136216 |
| ENSMUSG000000039987 | 784.7051911 | -0.243487384 | 0.123906904 | -1.965083274 | 0.0494046   | 0.149829521 |
| ENSMUSG000000038369 | 6979.754746 | -0.243196571 | 0.118604837 | -2.050477681 | 0.04031784  | 0.12885184  |
| ENSMUSG000000042744 | 18298.9242  | -0.243159093 | 0.111521609 | -2.180376476 | 0.029229566 | 0.100392509 |
| ENSMUSG000000029191 | 7957.353163 | -0.242968371 | 0.116514759 | -2.085301226 | 0.037041966 | 0.12048764  |
| ENSMUSG000000055044 | 10652.15064 | -0.242609123 | 0.091829842 | -2.641942081 | 0.008243215 | 0.037235556 |
| ENSMUSG000000026638 | 9194.106814 | -0.242483503 | 0.109635772 | -2.211718852 | 0.026986097 | 0.094610513 |
| ENSMUSG000000024335 | 33402.69397 | -0.242457319 | 0.112853184 | -2.148431367 | 0.031679503 | 0.10688118  |
| ENSMUSG000000039813 | 1031.999045 | -0.24208391  | 0.118073824 | -2.050275854 | 0.040337519 | 0.128877797 |
| ENSMUSG000000022471 | 3549.36973  | -0.241894584 | 0.117432868 | -2.059854177 | 0.039412483 | 0.126687511 |
| ENSMUSG000000071180 | 1448.537975 | -0.241728181 | 0.113854798 | -2.123126866 | 0.033743222 | 0.112214077 |
| ENSMUSG000000059878 | 2509.550592 | -0.241667094 | 0.118928444 | -2.032037799 | 0.042149829 | 0.133083292 |
| ENSMUSG000000041130 | 6793.709545 | -0.24137014  | 0.09300097  | -2.595350788 | 0.009449442 | 0.041490847 |
| ENSMUSG000000011179 | 10402.07563 | -0.240764526 | 0.097107088 | -2.479371297 | 0.013161422 | 0.053695845 |
| ENSMUSG000000029730 | 10714.061   | -0.240598718 | 0.109357486 | -2.200112008 | 0.027798949 | 0.096564543 |
| ENSMUSG000000022544 | 1460.033899 | -0.240411062 | 0.112717915 | -2.13285583  | 0.032936555 | 0.110337706 |
| ENSMUSG000000025158 | 1856.35507  | -0.239890083 | 0.112739847 | -2.12781983  | 0.033352025 | 0.111278202 |
| ENSMUSG000000026283 | 2376.699298 | -0.239800521 | 0.11754769  | -2.040027513 | 0.041347586 | 0.131363815 |
| ENSMUSG000000051768 | 2988.620343 | -0.239339602 | 0.09852541  | -2.429216995 | 0.015131473 | 0.059926652 |
| ENSMUSG000000019961 | 22104.05347 | -0.238972731 | 0.121174247 | -1.972141249 | 0.048593484 | 0.148064393 |
| ENSMUSG000000026657 | 1816.322163 | -0.238844486 | 0.116900679 | -2.043140288 | 0.041038553 | 0.130593716 |
| ENSMUSG000000020740 | 3581.471559 | -0.237955506 | 0.098267754 | -2.421501433 | 0.01545654  | 0.060975818 |
| ENSMUSG000000025362 | 54770.32564 | -0.237829406 | 0.112718129 | -2.109948143 | 0.034862823 | 0.115130433 |
| ENSMUSG000000019470 | 3659.662104 | -0.237701461 | 0.099797025 | -2.381849173 | 0.017225951 | 0.066279492 |
| ENSMUSG000000025153 | 32141.15375 | -0.237594868 | 0.111833154 | -2.124547683 | 0.033624373 | 0.111935684 |
| ENSMUSG000000003345 | 6981.688374 | -0.237153956 | 0.098766138 | -2.401166647 | 0.016342892 | 0.06359498  |
| ENSMUSG000000034354 | 6136.656031 | -0.237015577 | 0.120143188 | -1.972775819 | 0.048521109 | 0.147944936 |
| ENSMUSG000000027933 | 6142.767016 | -0.236834404 | 0.107233093 | -2.208594356 | 0.027202868 | 0.095059944 |
| ENSMUSG000000030301 | 2767.11265  | -0.236668384 | 0.104758582 | -2.259178945 | 0.023872256 | 0.085839274 |

|                    |             |              |             |              |             |             |
|--------------------|-------------|--------------|-------------|--------------|-------------|-------------|
| ENSMUSG00000057788 | 2723.070296 | -0.236024048 | 0.11891643  | -1.984789215 | 0.047167928 | 0.1448887   |
| ENSMUSG00000027546 | 7504.931569 | -0.235339687 | 0.102593201 | -2.293911144 | 0.021795603 | 0.079818493 |
| ENSMUSG00000029467 | 20849.7311  | -0.235313278 | 0.114688076 | -2.051767588 | 0.040192255 | 0.128579468 |
| ENSMUSG00000032571 | 3121.85674  | -0.235240951 | 0.109338515 | -2.151492089 | 0.03143738  | 0.106185924 |
| ENSMUSG00000022791 | 3732.220536 | -0.235142998 | 0.100465573 | -2.340533102 | 0.019256231 | 0.07235606  |
| ENSMUSG00000054648 | 1447.267336 | -0.234624018 | 0.11644466  | -2.014897193 | 0.043915422 | 0.137235169 |
| ENSMUSG00000031540 | 11074.32781 | -0.23447069  | 0.112117412 | -2.091295957 | 0.036501542 | 0.119410428 |
| ENSMUSG00000000916 | 1306.031437 | -0.234288809 | 0.114991448 | -2.037445502 | 0.041605418 | 0.131967441 |
| ENSMUSG00000034931 | 5143.200909 | -0.234265274 | 0.116879912 | -2.00432453  | 0.045035308 | 0.14001567  |
| ENSMUSG00000024050 | 6533.20435  | -0.233870024 | 0.097900321 | -2.388858588 | 0.016900806 | 0.065276217 |
| ENSMUSG00000032536 | 17245.82265 | -0.233594982 | 0.113239389 | -2.06284212  | 0.039127631 | 0.125960813 |
| ENSMUSG00000036686 | 3949.970127 | -0.233051814 | 0.104370856 | -2.232920398 | 0.025554194 | 0.090544024 |
| ENSMUSG00000060938 | 42833.19993 | -0.232842558 | 0.106241212 | -2.191640636 | 0.028405465 | 0.09824291  |
| ENSMUSG00000024590 | 14286.0557  | -0.232498461 | 0.101655097 | -2.287130375 | 0.022188214 | 0.080932183 |
| ENSMUSG00000022191 | 6903.558967 | -0.231716084 | 0.112507524 | -2.059560788 | 0.039440548 | 0.126720021 |
| ENSMUSG00000020372 | 79542.80522 | -0.231309987 | 0.106674439 | -2.168373123 | 0.030130309 | 0.102648132 |
| ENSMUSG00000021716 | 1511.862403 | -0.231051187 | 0.111710815 | -2.06829738  | 0.038612068 | 0.124704957 |
| ENSMUSG00000022234 | 18368.22897 | -0.230590484 | 0.105822742 | -2.179025787 | 0.029329753 | 0.100643609 |
| ENSMUSG00000036023 | 3640.32458  | -0.230269872 | 0.101850484 | -2.260861833 | 0.023767814 | 0.085574108 |
| ENSMUSG00000035632 | 7910.049192 | -0.230080132 | 0.100361133 | -2.292522274 | 0.021875524 | 0.080014114 |
| ENSMUSG00000014195 | 8539.337545 | -0.229273581 | 0.090769576 | -2.525885774 | 0.0115407   | 0.048468766 |
| ENSMUSG00000020918 | 5069.171787 | -0.228912377 | 0.114426621 | -2.000516792 | 0.045444488 | 0.14095376  |
| ENSMUSG00000026798 | 999.4850987 | -0.228890702 | 0.115417877 | -1.983147735 | 0.04735093  | 0.145310732 |
| ENSMUSG00000019370 | 17000.51085 | -0.22856515  | 0.098333417 | -2.324389389 | 0.020104634 | 0.074775423 |
| ENSMUSG00000038970 | 8759.662867 | -0.228231499 | 0.112646563 | -2.026084876 | 0.042756088 | 0.134542615 |
| ENSMUSG00000039850 | 1971.378273 | -0.226441956 | 0.112281791 | -2.016729117 | 0.04372379  | 0.136796329 |
| ENSMUSG00000049739 | 6380.003136 | -0.226392988 | 0.103655851 | -2.184083048 | 0.028956146 | 0.099622187 |
| ENSMUSG00000010054 | 1739.388402 | -0.226158951 | 0.103224172 | -2.190949523 | 0.028455445 | 0.098351621 |
| ENSMUSG00000060733 | 6087.003221 | -0.225809815 | 0.103202557 | -2.188025387 | 0.028667753 | 0.09884347  |

|                    |             |              |              |              |             |             |
|--------------------|-------------|--------------|--------------|--------------|-------------|-------------|
| ENSMUSG00000030400 | 3681.840005 | -0.225420036 | 0.10282961   | -2.192170477 | 0.028367199 | 0.098175639 |
| ENSMUSG00000019188 | 5348.002891 | -0.22446357  | 0.110512081  | -2.031122459 | 0.042242574 | 0.133321771 |
| ENSMUSG00000029613 | 2909.404407 | -0.223974358 | 0.113285274  | -1.977082716 | 0.048032281 | 0.146775541 |
| ENSMUSG00000064030 | 1731.172536 | -0.223357479 | 0.11344225   | -1.968909108 | 0.048963529 | 0.148907957 |
| ENSMUSG00000032485 | 5661.134021 | -0.222919179 | 0.10625241   | -2.098015265 | 0.035903797 | 0.117922029 |
| ENSMUSG00000024096 | 5298.236988 | -0.22208676  | 0.090640621  | -2.450190184 | 0.014278078 | 0.057403175 |
| ENSMUSG00000057421 | 3750.157268 | -0.221939881 | 0.099035259  | -2.241018844 | 0.025024854 | 0.089093116 |
| ENSMUSG00000070780 | 15775.08671 | -0.22119555  | 0.09250715   | -2.391118429 | 0.016797134 | 0.06493203  |
| ENSMUSG00000028854 | 4858.261588 | -0.219912105 | 0.10060371   | -2.185924402 | 0.028821137 | 0.099249563 |
| ENSMUSG00000018841 | 1430.917908 | -0.219779374 | 0.111003431  | -1.979933164 | 0.047711039 | 0.146094176 |
| ENSMUSG00000022286 | 6822.393429 | -0.218728887 | 0.102430582  | -2.135386555 | 0.032729448 | 0.109908059 |
| ENSMUSG00000067148 | 3249.895842 | -0.218512288 | 0.111445351  | -1.960712452 | 0.049912576 | 0.150928861 |
| ENSMUSG00000025377 | 1327.05365  | -0.218271012 | 0.1111159757 | -1.963579425 | 0.049578885 | 0.150204962 |
| ENSMUSG00000038406 | 10009.93904 | -0.217971253 | 0.089226529  | -2.442897362 | 0.01456988  | 0.05830305  |
| ENSMUSG00000035569 | 27567.92621 | -0.217880736 | 0.108360664  | -2.010699535 | 0.044357203 | 0.138339986 |
| ENSMUSG00000003438 | 3629.090653 | -0.217825363 | 0.098733908  | -2.206185972 | 0.027370981 | 0.095419767 |
| ENSMUSG00000003099 | 8316.33469  | -0.217502571 | 0.095451005  | -2.27868289  | 0.022685923 | 0.082367633 |
| ENSMUSG00000040188 | 4315.412878 | -0.217291783 | 0.101933493  | -2.131701533 | 0.033031391 | 0.110522587 |
| ENSMUSG00000020456 | 16496.60032 | -0.216336746 | 0.102119695  | -2.118462515 | 0.034135916 | 0.113283492 |
| ENSMUSG00000053841 | 9771.008087 | -0.215585059 | 0.09949298   | -2.166836889 | 0.030247294 | 0.102889703 |
| ENSMUSG00000052488 | 7505.494761 | -0.215216649 | 0.106306702  | -2.024488056 | 0.04291996  | 0.134886981 |
| ENSMUSG00000043987 | 4508.446499 | -0.215127509 | 0.107705594  | -1.997366166 | 0.04578542  | 0.141754916 |
| ENSMUSG00000045374 | 2004.674957 | -0.21292736  | 0.108009863  | -1.971369598 | 0.048681616 | 0.148251907 |
| ENSMUSG00000024867 | 6796.77863  | -0.21278642  | 0.098768315  | -2.154399619 | 0.031208846 | 0.105590829 |
| ENSMUSG00000031007 | 3772.161726 | -0.21247972  | 0.106991226  | -1.98595463  | 0.047038362 | 0.144610216 |
| ENSMUSG00000040687 | 3219.151451 | -0.211135297 | 0.105778998  | -1.996003946 | 0.045933493 | 0.142035889 |
| ENSMUSG00000006418 | 4104.272864 | -0.211084246 | 0.106286791  | -1.985987577 | 0.047034703 | 0.144610216 |
| ENSMUSG00000023353 | 3032.070851 | -0.210213525 | 0.097274372  | -2.161037089 | 0.030692475 | 0.104165709 |
| ENSMUSG00000020198 | 11768.11258 | -0.210028663 | 0.100308642  | -2.093824213 | 0.036275642 | 0.118880691 |

|                    |             |              |             |              |             |             |
|--------------------|-------------|--------------|-------------|--------------|-------------|-------------|
| ENSMUSG00000044433 | 8414.86295  | -0.209823986 | 0.099966728 | -2.098938208 | 0.035822348 | 0.117671849 |
| ENSMUSG00000024181 | 3588.301132 | -0.209611635 | 0.095579476 | -2.193061147 | 0.028302974 | 0.098010034 |
| ENSMUSG00000028890 | 1679.604822 | -0.209437005 | 0.103235085 | -2.028738624 | 0.04248492  | 0.133814065 |
| ENSMUSG00000019889 | 12820.27888 | -0.208546414 | 0.098698693 | -2.112960234 | 0.034604172 | 0.114496681 |
| ENSMUSG00000024219 | 4823.044026 | -0.208031507 | 0.093184746 | -2.232463101 | 0.025584371 | 0.090622152 |
| ENSMUSG00000010047 | 2270.100793 | -0.207961177 | 0.102826691 | -2.02244354  | 0.043130551 | 0.135434302 |
| ENSMUSG00000034889 | 4657.933963 | -0.20691569  | 0.094230371 | -2.195849249 | 0.028102735 | 0.097377113 |
| ENSMUSG00000028668 | 4306.587679 | -0.206843521 | 0.095284206 | -2.170805947 | 0.029945844 | 0.10216036  |
| ENSMUSG00000038762 | 11090.11589 | -0.206640498 | 0.094409437 | -2.188769516 | 0.028613596 | 0.09875979  |
| ENSMUSG00000022019 | 2379.974428 | -0.206377513 | 0.099816399 | -2.067571206 | 0.038680362 | 0.124871273 |
| ENSMUSG00000047284 | 7877.838689 | -0.205545021 | 0.094694743 | -2.170606467 | 0.029960933 | 0.102196201 |
| ENSMUSG00000032185 | 5107.034616 | -0.205064973 | 0.101988155 | -2.010674398 | 0.04435986  | 0.138339986 |
| ENSMUSG00000020841 | 7584.717135 | -0.203765966 | 0.100090524 | -2.035816762 | 0.041768759 | 0.132271695 |
| ENSMUSG00000042594 | 2242.793549 | -0.202664598 | 0.102005751 | -1.986795795 | 0.046945031 | 0.144449586 |
| ENSMUSG00000031930 | 5170.754337 | -0.20186135  | 0.096690873 | -2.087698071 | 0.036825079 | 0.120046205 |
| ENSMUSG00000006498 | 35130.79701 | -0.201854218 | 0.095782381 | -2.107425358 | 0.035080725 | 0.115644532 |
| ENSMUSG00000013465 | 4537.056404 | -0.201586447 | 0.097362951 | -2.070463609 | 0.03840895  | 0.124138841 |
| ENSMUSG00000029598 | 2521.878566 | -0.201043506 | 0.101190838 | -1.986775786 | 0.046947249 | 0.144449586 |
| ENSMUSG00000030374 | 7626.60047  | -0.198307408 | 0.091389276 | -2.169919895 | 0.030012915 | 0.102342204 |
| ENSMUSG00000019715 | 2906.036884 | -0.197909512 | 0.098647437 | -2.006230654 | 0.044831645 | 0.139508187 |
| ENSMUSG00000030733 | 4689.921455 | -0.193375633 | 0.095033717 | -2.034810793 | 0.041869915 | 0.13254233  |
| ENSMUSG00000020780 | 6028.352447 | -0.190635932 | 0.096827893 | -1.968812145 | 0.048974667 | 0.148920651 |
| ENSMUSG00000024858 | 5790.394185 | -0.189086688 | 0.093155447 | -2.029797455 | 0.042377132 | 0.133576313 |
| ENSMUSG00000025580 | 6514.555003 | -0.188772072 | 0.095373724 | -1.979288044 | 0.047783585 | 0.146246765 |
| ENSMUSG00000037706 | 13947.08779 | -0.186959489 | 0.093899753 | -1.991054106 | 0.046474939 | 0.143253299 |
| ENSMUSG00000026842 | 13839.01353 | -0.18656814  | 0.093278669 | -2.000115803 | 0.045487761 | 0.141068356 |
| ENSMUSG00000011752 | 3437.559534 | 0.191032169  | 0.097433585 | 1.960639843  | 0.049921051 | 0.150934024 |
| ENSMUSG00000038023 | 5807.278931 | 0.194425728  | 0.094429429 | 2.058952696  | 0.03949877  | 0.126870528 |
| ENSMUSG00000032435 | 4722.049408 | 0.196265806  | 0.0923626   | 2.124948911  | 0.033590876 | 0.111890983 |

|                    |             |             |             |             |             |             |
|--------------------|-------------|-------------|-------------|-------------|-------------|-------------|
| ENSMUSG00000047187 | 4858.67564  | 0.197271727 | 0.09438862  | 2.089994828 | 0.036618264 | 0.119564262 |
| ENSMUSG00000021102 | 3679.194561 | 0.199145644 | 0.095254777 | 2.090663077 | 0.036558277 | 0.11949086  |
| ENSMUSG00000027177 | 5928.304287 | 0.199166564 | 0.099510669 | 2.00145941  | 0.045342904 | 0.140759072 |
| ENSMUSG00000020919 | 3057.111365 | 0.200843883 | 0.101990723 | 1.969236793 | 0.048925906 | 0.148873874 |
| ENSMUSG00000028082 | 14911.05924 | 0.200957601 | 0.09418968  | 2.133541601 | 0.032880323 | 0.110259187 |
| ENSMUSG00000021893 | 4180.011293 | 0.201264765 | 0.101719151 | 1.978631974 | 0.047857457 | 0.146421889 |
| ENSMUSG00000035268 | 4316.803168 | 0.201386591 | 0.095349225 | 2.112094687 | 0.034678329 | 0.114639995 |
| ENSMUSG00000024429 | 2757.468616 | 0.202199181 | 0.100992083 | 2.00212902  | 0.045270857 | 0.140610778 |
| ENSMUSG00000021686 | 9348.025344 | 0.203588182 | 0.09753388  | 2.087358587 | 0.036855733 | 0.120111017 |
| ENSMUSG00000027236 | 3617.744375 | 0.204621613 | 0.103142779 | 1.983867555 | 0.047270607 | 0.145184107 |
| ENSMUSG00000021171 | 5456.321121 | 0.204717862 | 0.10367863  | 1.974542498 | 0.04832009  | 0.147452973 |
| ENSMUSG00000018293 | 26423.07532 | 0.204876131 | 0.102049583 | 2.007613604 | 0.044684368 | 0.139176828 |
| ENSMUSG00000038844 | 5198.914658 | 0.205252366 | 0.101850984 | 2.015222213 | 0.043881371 | 0.137173879 |
| ENSMUSG00000020149 | 6269.037787 | 0.20655923  | 0.099057467 | 2.085246432 | 0.037046937 | 0.12048764  |
| ENSMUSG00000020496 | 7446.732178 | 0.206946073 | 0.096105878 | 2.153313379 | 0.031294058 | 0.105788811 |
| ENSMUSG00000020477 | 3563.75814  | 0.207761277 | 0.094751685 | 2.192692161 | 0.028329566 | 0.098086889 |
| ENSMUSG00000054128 | 3310.733194 | 0.208001788 | 0.101054034 | 2.058322454 | 0.03955919  | 0.127028006 |
| ENSMUSG00000044627 | 5919.826797 | 0.21027384  | 0.103733222 | 2.027063605 | 0.042655908 | 0.134265266 |
| ENSMUSG00000024091 | 6135.980223 | 0.210447329 | 0.099503539 | 2.114973297 | 0.034432223 | 0.114063133 |
| ENSMUSG00000034714 | 3905.187564 | 0.21061293  | 0.10342145  | 2.036453064 | 0.041704882 | 0.132148418 |
| ENSMUSG00000003119 | 10924.17496 | 0.210746621 | 0.095737692 | 2.201292055 | 0.027715355 | 0.096394281 |
| ENSMUSG00000029462 | 2147.221381 | 0.211680647 | 0.101713541 | 2.081145195 | 0.037420618 | 0.121482848 |
| ENSMUSG00000047909 | 2456.82918  | 0.212454764 | 0.101453063 | 2.094118765 | 0.036249402 | 0.118837447 |
| ENSMUSG00000044408 | 3441.379177 | 0.21283975  | 0.105949889 | 2.00887185  | 0.044550726 | 0.138818743 |
| ENSMUSG00000059447 | 5567.851787 | 0.213211538 | 0.10798956  | 1.974371757 | 0.048339487 | 0.147491983 |
| ENSMUSG00000022051 | 2679.611104 | 0.214390921 | 0.105139682 | 2.039105666 | 0.041439483 | 0.131531726 |
| ENSMUSG00000026277 | 9406.522351 | 0.215031804 | 0.088629786 | 2.426179894 | 0.015258705 | 0.060355511 |
| ENSMUSG00000024454 | 6819.794591 | 0.215130661 | 0.095869809 | 2.243987572 | 0.024833201 | 0.088566323 |
| ENSMUSG00000036918 | 7690.3528   | 0.215265283 | 0.095674991 | 2.24996397  | 0.024451233 | 0.087399733 |

|                    |             |             |             |             |             |             |
|--------------------|-------------|-------------|-------------|-------------|-------------|-------------|
| ENSMUSG00000003200 | 3423.013799 | 0.215337373 | 0.102966799 | 2.091328222 | 0.036498652 | 0.119410428 |
| ENSMUSG00000079614 | 5091.580003 | 0.215574871 | 0.103512644 | 2.082594568 | 0.037288195 | 0.121130959 |
| ENSMUSG00000024983 | 3341.703207 | 0.21619885  | 0.103636077 | 2.086135021 | 0.036966394 | 0.120330982 |
| ENSMUSG00000021870 | 9676.678881 | 0.216592756 | 0.095015724 | 2.279546451 | 0.022634602 | 0.082250979 |
| ENSMUSG00000041341 | 10129.73355 | 0.217118895 | 0.107491505 | 2.019870264 | 0.043396846 | 0.136043188 |
| ENSMUSG00000062270 | 7170.369111 | 0.217125413 | 0.097800122 | 2.220093467 | 0.026412424 | 0.093008599 |
| ENSMUSG00000028277 | 2261.959338 | 0.217179662 | 0.10861902  | 1.999462546 | 0.04555833  | 0.141208662 |
| ENSMUSG00000021114 | 1384.632654 | 0.218380615 | 0.107835762 | 2.025122379 | 0.042854799 | 0.134736439 |
| ENSMUSG00000036155 | 13483.47338 | 0.218401095 | 0.109361212 | 1.997061757 | 0.045818475 | 0.141817877 |
| ENSMUSG00000022216 | 16122.20678 | 0.218776727 | 0.097282239 | 2.248886648 | 0.024519709 | 0.087630453 |
| ENSMUSG00000027706 | 3157.131611 | 0.218856013 | 0.10432585  | 2.097811925 | 0.035921763 | 0.117963662 |
| ENSMUSG00000053877 | 4105.988743 | 0.219289977 | 0.099339312 | 2.207484355 | 0.027280239 | 0.095267242 |
| ENSMUSG00000042185 | 4646.548434 | 0.219307907 | 0.104157336 | 2.105544513 | 0.035243937 | 0.116028201 |
| ENSMUSG00000024566 | 5673.774173 | 0.219377488 | 0.111648297 | 1.964897761 | 0.049426072 | 0.149864151 |
| ENSMUSG00000022744 | 1867.536061 | 0.219997901 | 0.108923611 | 2.019744838 | 0.043409862 | 0.136043188 |
| ENSMUSG00000018286 | 7313.11923  | 0.220479494 | 0.098356901 | 2.241627094 | 0.024985483 | 0.088981358 |
| ENSMUSG00000041488 | 2721.680187 | 0.220487025 | 0.100933465 | 2.184478903 | 0.028927076 | 0.099552889 |
| ENSMUSG00000038563 | 3581.740499 | 0.220913859 | 0.112684511 | 1.960463395 | 0.049941652 | 0.150975842 |
| ENSMUSG00000074884 | 8520.293344 | 0.220992967 | 0.103800337 | 2.129019757 | 0.033252626 | 0.111109309 |
| ENSMUSG00000029071 | 7097.660391 | 0.221114722 | 0.106426642 | 2.077625647 | 0.037743852 | 0.122361629 |
| ENSMUSG00000021065 | 6990.800079 | 0.221192399 | 0.107194864 | 2.063460802 | 0.039068868 | 0.125852207 |
| ENSMUSG00000025423 | 2646.064022 | 0.221204366 | 0.108950798 | 2.030314337 | 0.042324598 | 0.133486191 |
| ENSMUSG00000023456 | 25759.64183 | 0.22129823  | 0.098292515 | 2.251425034 | 0.02435863  | 0.087124588 |
| ENSMUSG00000059534 | 7627.085315 | 0.221353926 | 0.104241996 | 2.123462077 | 0.03371515  | 0.112154171 |
| ENSMUSG00000015671 | 5089.366196 | 0.221537921 | 0.109952078 | 2.014858871 | 0.043919439 | 0.137235169 |
| ENSMUSG00000003604 | 1767.191742 | 0.222055205 | 0.10653239  | 2.084391464 | 0.037124574 | 0.120687335 |
| ENSMUSG00000021877 | 6770.274331 | 0.222314869 | 0.0946853   | 2.347934348 | 0.018877848 | 0.071210233 |
| ENSMUSG00000003038 | 13413.79619 | 0.222336838 | 0.101121406 | 2.198711899 | 0.027898414 | 0.09684971  |
| ENSMUSG00000025894 | 1767.415365 | 0.222839009 | 0.111199299 | 2.00396056  | 0.045074285 | 0.140097789 |

|                    |             |             |             |             |             |             |
|--------------------|-------------|-------------|-------------|-------------|-------------|-------------|
| ENSMUSG00000020362 | 6950.789503 | 0.223103446 | 0.110693335 | 2.015509302 | 0.043851312 | 0.137099133 |
| ENSMUSG00000090112 | 4653.357192 | 0.223212567 | 0.111813982 | 1.996284928 | 0.045902918 | 0.141980717 |
| ENSMUSG00000025612 | 4420.825445 | 0.223225527 | 0.112224138 | 1.989104397 | 0.046689681 | 0.143815826 |
| ENSMUSG00000034210 | 5630.990276 | 0.223581614 | 0.106117129 | 2.106932371 | 0.035123442 | 0.115751128 |
| ENSMUSG00000032557 | 2594.790359 | 0.223946862 | 0.108473842 | 2.064524109 | 0.03896805  | 0.125600013 |
| ENSMUSG00000026409 | 1100.564332 | 0.224018019 | 0.112231364 | 1.996037564 | 0.045929834 | 0.142035889 |
| ENSMUSG00000021764 | 4337.428741 | 0.225169397 | 0.104884454 | 2.146832912 | 0.031806586 | 0.107277477 |
| ENSMUSG00000021767 | 5312.460499 | 0.225185192 | 0.097992418 | 2.297985877 | 0.021562593 | 0.079142098 |
| ENSMUSG00000001998 | 1448.177023 | 0.22718126  | 0.115180352 | 1.972395943 | 0.048564425 | 0.148016295 |
| ENSMUSG00000020107 | 2246.908499 | 0.227360308 | 0.109640681 | 2.073685666 | 0.038108513 | 0.123310789 |
| ENSMUSG00000057411 | 1732.029141 | 0.227675105 | 0.108559071 | 2.09724625  | 0.035971782 | 0.118093142 |
| ENSMUSG00000046792 | 2222.639637 | 0.227813614 | 0.113557911 | 2.006144809 | 0.0448408   | 0.139508187 |
| ENSMUSG00000035227 | 3239.479961 | 0.227890565 | 0.110054187 | 2.070712352 | 0.038385685 | 0.12408163  |
| ENSMUSG00000026028 | 3922.329851 | 0.227905086 | 0.102688716 | 2.219378077 | 0.026461014 | 0.093106196 |
| ENSMUSG00000020694 | 3849.70437  | 0.228677669 | 0.094201757 | 2.427530833 | 0.015201995 | 0.060171309 |
| ENSMUSG00000024236 | 8253.096217 | 0.228926463 | 0.114120248 | 2.006010916 | 0.044855083 | 0.139520354 |
| ENSMUSG00000021338 | 9545.019976 | 0.229284881 | 0.100604709 | 2.279067092 | 0.022663077 | 0.082314216 |
| ENSMUSG00000018076 | 8875.7552   | 0.229302331 | 0.106464694 | 2.153787529 | 0.031256838 | 0.105695034 |
| ENSMUSG00000043991 | 3996.0395   | 0.230083145 | 0.094998031 | 2.421978053 | 0.015436283 | 0.060928237 |
| ENSMUSG00000015971 | 2195.376433 | 0.230136982 | 0.104094195 | 2.210853172 | 0.027046006 | 0.094760878 |
| ENSMUSG00000021585 | 9411.989861 | 0.230983654 | 0.109781167 | 2.104037151 | 0.035375206 | 0.116391632 |
| ENSMUSG00000027679 | 1476.752605 | 0.231060327 | 0.109595395 | 2.10830324  | 0.035004768 | 0.115428261 |
| ENSMUSG00000000861 | 2862.091097 | 0.231129458 | 0.116526046 | 1.983500385 | 0.047311564 | 0.145245487 |
| ENSMUSG00000029192 | 6015.251395 | 0.231282198 | 0.11065981  | 2.090028875 | 0.036615206 | 0.119564262 |
| ENSMUSG00000060860 | 6919.454343 | 0.231523557 | 0.117018787 | 1.978516123 | 0.047870511 | 0.146423328 |
| ENSMUSG00000031353 | 15073.48848 | 0.231569859 | 0.096038637 | 2.411215584 | 0.015899447 | 0.062293319 |
| ENSMUSG00000003423 | 2811.020653 | 0.23163977  | 0.100241069 | 2.310827003 | 0.020842412 | 0.07700181  |
| ENSMUSG00000055839 | 8047.865457 | 0.232017446 | 0.113741147 | 2.039872566 | 0.04136302  | 0.131363815 |
| ENSMUSG00000007817 | 7424.987011 | 0.23209807  | 0.105081315 | 2.208747301 | 0.027192222 | 0.095049177 |

|                    |             |             |             |             |             |             |
|--------------------|-------------|-------------|-------------|-------------|-------------|-------------|
| ENSMUSG00000006369 | 3952.583857 | 0.232511639 | 0.110386648 | 2.106338429 | 0.035174965 | 0.115869558 |
| ENSMUSG00000021537 | 2638.779145 | 0.232773663 | 0.1085064   | 2.14525283  | 0.031932638 | 0.107670057 |
| ENSMUSG00000030327 | 1630.070044 | 0.233193028 | 0.106449358 | 2.190647575 | 0.028477306 | 0.098388832 |
| ENSMUSG00000040701 | 5394.456094 | 0.233453419 | 0.094346476 | 2.474426483 | 0.013345028 | 0.054248537 |
| ENSMUSG00000027523 | 31616.53848 | 0.233564296 | 0.093591211 | 2.495579377 | 0.012575162 | 0.051722368 |
| ENSMUSG00000031950 | 2346.290977 | 0.233574822 | 0.115742909 | 2.018048651 | 0.043586195 | 0.136461565 |
| ENSMUSG00000031681 | 5979.132858 | 0.233643384 | 0.097182103 | 2.404181195 | 0.016208737 | 0.063194239 |
| ENSMUSG00000059486 | 2107.589363 | 0.233729856 | 0.112276182 | 2.081740323 | 0.037366195 | 0.121359435 |
| ENSMUSG00000006058 | 2192.23279  | 0.233952935 | 0.10223671  | 2.288345688 | 0.022117398 | 0.080739906 |
| ENSMUSG00000020444 | 2842.473902 | 0.234342337 | 0.10013721  | 2.340212366 | 0.019272777 | 0.072377947 |
| ENSMUSG00000068015 | 6101.286316 | 0.234523949 | 0.10949756  | 2.141818954 | 0.032208054 | 0.108352965 |
| ENSMUSG00000029397 | 1525.512006 | 0.234841942 | 0.117966357 | 1.990753543 | 0.046507989 | 0.14333536  |
| ENSMUSG00000004849 | 3864.019925 | 0.235252279 | 0.11874725  | 1.981117697 | 0.047578076 | 0.145837869 |
| ENSMUSG00000026383 | 2798.356679 | 0.235547044 | 0.110430392 | 2.13299111  | 0.032925455 | 0.110317095 |
| ENSMUSG00000028138 | 6669.583151 | 0.235641614 | 0.105519864 | 2.23314933  | 0.025539098 | 0.090520984 |
| ENSMUSG00000026361 | 3870.046606 | 0.236051676 | 0.098559432 | 2.395018623 | 0.016619521 | 0.064390539 |
| ENSMUSG00000025151 | 6503.612064 | 0.236110572 | 0.105732666 | 2.233090117 | 0.025543002 | 0.090520984 |
| ENSMUSG00000032477 | 6193.116946 | 0.236592912 | 0.097129669 | 2.435845953 | 0.01485701  | 0.059154826 |
| ENSMUSG00000036104 | 2863.967876 | 0.236687757 | 0.097262651 | 2.433490714 | 0.014954019 | 0.059456156 |
| ENSMUSG00000061436 | 17141.18216 | 0.236978103 | 0.119969708 | 1.975316158 | 0.048232281 | 0.14726562  |
| ENSMUSG00000016481 | 2730.306303 | 0.237122407 | 0.103123036 | 2.299412592 | 0.021481522 | 0.078896478 |
| ENSMUSG00000054428 | 21528.56251 | 0.237165594 | 0.089916953 | 2.637607089 | 0.008349326 | 0.037626634 |
| ENSMUSG00000023021 | 952.0857824 | 0.23731752  | 0.114346446 | 2.075425417 | 0.037947125 | 0.122931265 |
| ENSMUSG00000026575 | 999.0226847 | 0.237723158 | 0.117066863 | 2.030661384 | 0.042289356 | 0.133415542 |
| ENSMUSG00000027011 | 3357.677336 | 0.237969343 | 0.096611495 | 2.463157654 | 0.013771934 | 0.055770458 |
| ENSMUSG00000006057 | 9557.987873 | 0.238030567 | 0.107706162 | 2.209999515 | 0.027105196 | 0.094878822 |
| ENSMUSG00000070372 | 5297.105601 | 0.238061018 | 0.115597647 | 2.059393298 | 0.039456577 | 0.12675326  |
| ENSMUSG00000051413 | 6547.727176 | 0.238213761 | 0.118985706 | 2.002036794 | 0.045280774 | 0.140617856 |
| ENSMUSG00000037296 | 1547.675014 | 0.238730837 | 0.114177171 | 2.090880647 | 0.036538764 | 0.119474101 |



|                    |             |             |             |             |             |             |
|--------------------|-------------|-------------|-------------|-------------|-------------|-------------|
| ENSMUSG00000037253 | 6574.121161 | 0.238965849 | 0.097984121 | 2.438822194 | 0.014735216 | 0.05879608  |
| ENSMUSG00000064302 | 6072.358126 | 0.23942605  | 0.116913663 | 2.047887674 | 0.040571007 | 0.129438344 |
| ENSMUSG00000031813 | 2694.715891 | 0.23964675  | 0.107403853 | 2.23126773  | 0.0256634   | 0.090829945 |
| ENSMUSG00000020189 | 1809.538177 | 0.239892332 | 0.117971728 | 2.03347307  | 0.042004752 | 0.132777883 |
| ENSMUSG00000022370 | 3027.764341 | 0.240588079 | 0.101746259 | 2.364588934 | 0.018050093 | 0.068785906 |
| ENSMUSG00000093904 | 6913.77959  | 0.240752323 | 0.104762498 | 2.298077351 | 0.021557387 | 0.079136015 |
| ENSMUSG00000039835 | 8654.95918  | 0.241211199 | 0.108263108 | 2.228009179 | 0.025879903 | 0.091465565 |
| ENSMUSG00000030512 | 1720.367962 | 0.241395599 | 0.123036411 | 1.961985059 | 0.049764224 | 0.15062323  |
| ENSMUSG00000014956 | 7838.355911 | 0.241449565 | 0.103239515 | 2.338732076 | 0.019349304 | 0.072539342 |
| ENSMUSG00000042369 | 3110.699173 | 0.241675332 | 0.115478762 | 2.092811942 | 0.036365945 | 0.119106616 |
| ENSMUSG00000024535 | 1340.352718 | 0.242020193 | 0.119767857 | 2.020744126 | 0.043306259 | 0.135813935 |
| ENSMUSG00000045636 | 14246.00898 | 0.242038702 | 0.112600015 | 2.14954413  | 0.031591292 | 0.106631966 |
| ENSMUSG00000027365 | 8725.999298 | 0.242159479 | 0.120121796 | 2.015949537 | 0.043805253 | 0.136993541 |
| ENSMUSG00000028030 | 2567.831965 | 0.242317515 | 0.113831891 | 2.128731352 | 0.033276493 | 0.111109309 |
| ENSMUSG00000032324 | 7641.290943 | 0.242516412 | 0.107323755 | 2.259671316 | 0.023841658 | 0.085743075 |
| ENSMUSG00000036501 | 5717.430402 | 0.242526877 | 0.111439865 | 2.176302681 | 0.029532635 | 0.101090913 |
| ENSMUSG00000060639 | 1190.265487 | 0.242541601 | 0.115945022 | 2.091867296 | 0.036450388 | 0.119313094 |
| ENSMUSG00000028381 | 2472.059656 | 0.242590113 | 0.109525806 | 2.214912823 | 0.026766049 | 0.093994598 |
| ENSMUSG00000039285 | 5154.916312 | 0.242739709 | 0.101781669 | 2.384905963 | 0.017083488 | 0.065833568 |
| ENSMUSG00000022205 | 4983.237113 | 0.242977137 | 0.095174373 | 2.552968082 | 0.010680928 | 0.045657539 |
| ENSMUSG00000032913 | 2053.731572 | 0.243006429 | 0.117716293 | 2.0643398   | 0.03898551  | 0.12563813  |
| ENSMUSG00000044709 | 1018.294665 | 0.24301732  | 0.11385855  | 2.134379195 | 0.032811753 | 0.110101551 |
| ENSMUSG00000025616 | 3804.190173 | 0.243133376 | 0.105931715 | 2.295189658 | 0.021722258 | 0.079597119 |
| ENSMUSG00000060512 | 2828.554537 | 0.243254364 | 0.100428945 | 2.422153937 | 0.015428813 | 0.060928237 |
| ENSMUSG00000022890 | 11447.94654 | 0.243270187 | 0.112587812 | 2.160715111 | 0.030717353 | 0.104222158 |
| ENSMUSG00000047879 | 3992.483211 | 0.243759745 | 0.115683722 | 2.107122247 | 0.035106984 | 0.11571399  |
| ENSMUSG00000000838 | 4061.79776  | 0.244160647 | 0.106314407 | 2.296590395 | 0.021642147 | 0.079381829 |
| ENSMUSG00000021771 | 13320.94324 | 0.24424938  | 0.098182677 | 2.487703415 | 0.01285709  | 0.05267793  |
| ENSMUSG00000024927 | 3283.753006 | 0.244360375 | 0.113445489 | 2.153989345 | 0.031241007 | 0.105673549 |

|                    |             |             |             |             |             |             |
|--------------------|-------------|-------------|-------------|-------------|-------------|-------------|
| ENSMUSG00000025466 | 1366.554956 | 0.244741323 | 0.120213873 | 2.035882529 | 0.041762153 | 0.132271695 |
| ENSMUSG00000025068 | 22429.9681  | 0.244858277 | 0.110889627 | 2.208126075 | 0.027235486 | 0.095142804 |
| ENSMUSG00000051853 | 5280.948551 | 0.244951173 | 0.113688599 | 2.154579921 | 0.031194722 | 0.105589267 |
| ENSMUSG00000021408 | 3892.790782 | 0.245085678 | 0.10177513  | 2.408109712 | 0.016035361 | 0.062687957 |
| ENSMUSG00000041763 | 6898.202502 | 0.245220241 | 0.109131738 | 2.247011224 | 0.02463931  | 0.088001481 |
| ENSMUSG00000039210 | 3929.641689 | 0.245288058 | 0.097263012 | 2.521904796 | 0.011672129 | 0.048864306 |
| ENSMUSG00000026490 | 3551.233618 | 0.245375263 | 0.12047495  | 2.03673263  | 0.041676843 | 0.13212259  |
| ENSMUSG00000057982 | 2563.517193 | 0.245414764 | 0.119620951 | 2.05160352  | 0.04020821  | 0.128593616 |
| ENSMUSG00000025351 | 5131.275777 | 0.245449838 | 0.123738701 | 1.983614144 | 0.047298871 | 0.145230914 |
| ENSMUSG00000067336 | 4525.065943 | 0.246134297 | 0.117723673 | 2.09077997  | 0.036547792 | 0.119474101 |
| ENSMUSG00000031154 | 5867.884411 | 0.246172878 | 0.0969735   | 2.538558232 | 0.011131028 | 0.047183142 |
| ENSMUSG00000029655 | 4694.551563 | 0.246250619 | 0.099072296 | 2.485564867 | 0.012934601 | 0.052956589 |
| ENSMUSG00000072704 | 3117.613886 | 0.246267556 | 0.108406427 | 2.271706232 | 0.02310426  | 0.083630594 |
| ENSMUSG00000044279 | 2136.4204   | 0.246821642 | 0.125194138 | 1.97151117  | 0.048665437 | 0.148222876 |
| ENSMUSG00000048799 | 2293.408849 | 0.247226552 | 0.108530823 | 2.277938598 | 0.022730236 | 0.082464128 |
| ENSMUSG00000024583 | 5054.946978 | 0.247391464 | 0.099259043 | 2.492382118 | 0.012688944 | 0.052135625 |
| ENSMUSG00000061132 | 6612.971645 | 0.247476574 | 0.096418436 | 2.566693526 | 0.010267331 | 0.044279976 |
| ENSMUSG00000025903 | 1809.56212  | 0.247761132 | 0.119353354 | 2.075862337 | 0.037906685 | 0.1228181   |
| ENSMUSG00000022111 | 2225.84165  | 0.248372658 | 0.125428429 | 1.980194277 | 0.047681703 | 0.14603926  |
| ENSMUSG00000029422 | 6079.750244 | 0.248438182 | 0.105456355 | 2.35583889  | 0.018480931 | 0.070044739 |
| ENSMUSG00000028233 | 2447.378854 | 0.24889229  | 0.122567627 | 2.030652756 | 0.042290232 | 0.133415542 |
| ENSMUSG00000034165 | 2243.518871 | 0.249306634 | 0.119254679 | 2.090539643 | 0.036569351 | 0.119499977 |
| ENSMUSG00000021709 | 14238.47328 | 0.249382206 | 0.1013023   | 2.461762535 | 0.013825617 | 0.055937062 |
| ENSMUSG00000041319 | 2004.075985 | 0.249815786 | 0.113049679 | 2.209787677 | 0.027119901 | 0.0948975   |
| ENSMUSG00000036792 | 1888.073375 | 0.249934668 | 0.111738663 | 2.236778758 | 0.025300804 | 0.089888995 |
| ENSMUSG00000047459 | 2971.70772  | 0.250074095 | 0.121317464 | 2.061319837 | 0.039272537 | 0.126325811 |
| ENSMUSG00000040943 | 3784.188853 | 0.25008553  | 0.124447847 | 2.009560917 | 0.044477681 | 0.138629877 |
| ENSMUSG00000090266 | 1025.973983 | 0.250183842 | 0.127097758 | 1.968436314 | 0.049017857 | 0.148939753 |
| ENSMUSG00000028180 | 4087.67808  | 0.250208541 | 0.122593397 | 2.040962628 | 0.041254542 | 0.131119056 |

|                    |             |             |             |             |             |             |
|--------------------|-------------|-------------|-------------|-------------|-------------|-------------|
| ENSMUSG00000037361 | 2996.032079 | 0.250356176 | 0.104053444 | 2.406034498 | 0.016126742 | 0.062973642 |
| ENSMUSG00000073910 | 4543.311266 | 0.250422879 | 0.104094191 | 2.405733463 | 0.016140036 | 0.063014519 |
| ENSMUSG00000029911 | 2453.093499 | 0.250594773 | 0.119496594 | 2.097087167 | 0.03598586  | 0.118121969 |
| ENSMUSG00000069237 | 3276.851253 | 0.25067377  | 0.127266209 | 1.969680493 | 0.048875    | 0.148779877 |
| ENSMUSG00000036499 | 4619.159214 | 0.250696761 | 0.101216576 | 2.476835036 | 0.013255315 | 0.05400197  |
| ENSMUSG00000037426 | 4401.250319 | 0.250873014 | 0.120513232 | 2.081705137 | 0.037369411 | 0.121359435 |
| ENSMUSG00000026223 | 2807.486196 | 0.251192593 | 0.10733953  | 2.340168561 | 0.019275038 | 0.072377947 |
| ENSMUSG00000005233 | 1626.695909 | 0.251499182 | 0.110155322 | 2.283132365 | 0.022422573 | 0.081680136 |
| ENSMUSG00000029571 | 1038.737097 | 0.251681073 | 0.120211653 | 2.093649547 | 0.03629121  | 0.118914235 |
| ENSMUSG00000027722 | 3345.617612 | 0.252054625 | 0.123177052 | 2.046279078 | 0.040728921 | 0.129775063 |
| ENSMUSG00000033004 | 12834.22001 | 0.252261634 | 0.122038317 | 2.067069106 | 0.038727643 | 0.124987722 |
| ENSMUSG00000026150 | 3125.948182 | 0.252401024 | 0.104294812 | 2.420072664 | 0.015517406 | 0.061161836 |
| ENSMUSG00000045160 | 1826.417108 | 0.25245518  | 0.117331651 | 2.151637491 | 0.031425917 | 0.106170182 |
| ENSMUSG00000026155 | 3056.259751 | 0.252589451 | 0.108299051 | 2.33233301  | 0.019683179 | 0.07352673  |
| ENSMUSG00000039318 | 4391.467366 | 0.252801619 | 0.104749676 | 2.413388087 | 0.015804981 | 0.062010358 |
| ENSMUSG00000068250 | 1889.592682 | 0.252873646 | 0.112712213 | 2.243533676 | 0.024862421 | 0.088642182 |
| ENSMUSG00000028630 | 6276.886536 | 0.252910857 | 0.103475545 | 2.444160676 | 0.014518959 | 0.058130574 |
| ENSMUSG00000008450 | 1695.739011 | 0.253028542 | 0.114202165 | 2.215619489 | 0.026717573 | 0.093875626 |
| ENSMUSG00000068391 | 1474.294773 | 0.253038761 | 0.11998157  | 2.10898025  | 0.034946286 | 0.115320677 |
| ENSMUSG00000019362 | 3072.819783 | 0.253143858 | 0.101186245 | 2.501761566 | 0.012357712 | 0.05106343  |
| ENSMUSG00000006412 | 1604.496722 | 0.253249766 | 0.125303823 | 2.021085705 | 0.043270894 | 0.135779401 |
| ENSMUSG00000029649 | 3960.356685 | 0.253272216 | 0.122364178 | 2.069823209 | 0.038468903 | 0.124314593 |
| ENSMUSG00000058503 | 2211.862906 | 0.253305438 | 0.104848919 | 2.415908901 | 0.015695988 | 0.061691263 |
| ENSMUSG00000041431 | 4982.774811 | 0.253747492 | 0.128909956 | 1.968408795 | 0.049021021 | 0.148939753 |
| ENSMUSG00000034343 | 1644.226687 | 0.253791427 | 0.127182184 | 1.995495123 | 0.045988906 | 0.142148106 |
| ENSMUSG00000021431 | 3463.572933 | 0.253880397 | 0.104994549 | 2.418034063 | 0.015604616 | 0.061397061 |
| ENSMUSG00000050565 | 8193.622659 | 0.254130196 | 0.104313231 | 2.436222071 | 0.01484157  | 0.059114458 |
| ENSMUSG00000089917 | 2707.090256 | 0.254379802 | 0.117048155 | 2.173291859 | 0.029758358 | 0.101635165 |
| ENSMUSG00000048076 | 13130.40967 | 0.254549862 | 0.098327504 | 2.588796132 | 0.00963121  | 0.042139612 |

|                    |             |             |             |             |             |             |
|--------------------|-------------|-------------|-------------|-------------|-------------|-------------|
| ENSMUSG00000052707 | 10636.772   | 0.254612181 | 0.106978951 | 2.380021285 | 0.017311638 | 0.066528837 |
| ENSMUSG00000025949 | 4014.108033 | 0.254612553 | 0.125302319 | 2.031985962 | 0.042155077 | 0.133083292 |
| ENSMUSG00000047213 | 5576.46332  | 0.254790884 | 0.095428316 | 2.669971516 | 0.007585768 | 0.034837359 |
| ENSMUSG00000015092 | 7607.843217 | 0.254960603 | 0.113938382 | 2.237706029 | 0.025240232 | 0.089730976 |
| ENSMUSG00000031198 | 1949.271007 | 0.255017997 | 0.115299447 | 2.211788542 | 0.026981279 | 0.094610513 |
| ENSMUSG00000026032 | 2857.396748 | 0.255065586 | 0.124603827 | 2.04701246  | 0.040656861 | 0.129601009 |
| ENSMUSG00000025733 | 2022.854431 | 0.255335817 | 0.102213271 | 2.498069146 | 0.012487183 | 0.05145541  |
| ENSMUSG00000020064 | 3524.40271  | 0.255433739 | 0.110393375 | 2.313850246 | 0.020675938 | 0.076542844 |
| ENSMUSG00000055531 | 9162.398809 | 0.255642095 | 0.112464452 | 2.273092442 | 0.02302061  | 0.083381942 |
| ENSMUSG00000028191 | 2521.771634 | 0.255653529 | 0.097884799 | 2.611779686 | 0.009007228 | 0.039926493 |
| ENSMUSG00000026175 | 34631.77755 | 0.255864776 | 0.099749102 | 2.565083509 | 0.010315098 | 0.044443004 |
| ENSMUSG00000027272 | 3387.006298 | 0.256126711 | 0.127639857 | 2.006635838 | 0.044788452 | 0.139462061 |
| ENSMUSG00000032580 | 9320.923116 | 0.256182128 | 0.090606253 | 2.827422155 | 0.004692442 | 0.023542442 |
| ENSMUSG00000036199 | 8113.663168 | 0.256195728 | 0.126052387 | 2.032454397 | 0.042107676 | 0.132992076 |
| ENSMUSG00000031349 | 1517.287627 | 0.256615553 | 0.121298954 | 2.115562784 | 0.03438201  | 0.113947571 |
| ENSMUSG00000028096 | 3729.828219 | 0.256619391 | 0.110585178 | 2.320558658 | 0.020310676 | 0.075353249 |
| ENSMUSG00000046404 | 1273.816447 | 0.256778747 | 0.109902031 | 2.336433146 | 0.019468678 | 0.072859663 |
| ENSMUSG00000039968 | 3195.148763 | 0.257240671 | 0.109217167 | 2.355313521 | 0.018507083 | 0.070108114 |
| ENSMUSG00000000266 | 1412.323559 | 0.25735863  | 0.124628046 | 2.065013755 | 0.038921699 | 0.125468749 |
| ENSMUSG00000004285 | 2985.597427 | 0.257402781 | 0.126768121 | 2.030500878 | 0.042305652 | 0.133445311 |
| ENSMUSG00000026484 | 1678.701709 | 0.257923136 | 0.112330293 | 2.296113792 | 0.021669376 | 0.079442504 |
| ENSMUSG00000032267 | 2199.348115 | 0.258051652 | 0.112994867 | 2.28374668  | 0.022386423 | 0.081575101 |
| ENSMUSG00000066892 | 1034.940668 | 0.258245302 | 0.114601851 | 2.253413019 | 0.024233119 | 0.086828856 |
| ENSMUSG00000047044 | 2504.217549 | 0.258314752 | 0.114553221 | 2.254975897 | 0.024134842 | 0.086585558 |
| ENSMUSG00000021413 | 15170.27301 | 0.258441023 | 0.115509082 | 2.237408673 | 0.025259642 | 0.089771359 |
| ENSMUSG00000015668 | 1172.165504 | 0.258530118 | 0.126960733 | 2.036299826 | 0.041720257 | 0.132178357 |
| ENSMUSG00000051483 | 3479.156321 | 0.258544885 | 0.130974413 | 1.974010633 | 0.048380534 | 0.14759703  |
| ENSMUSG00000038733 | 10028.17222 | 0.258647184 | 0.102431999 | 2.525062356 | 0.011567776 | 0.04856419  |
| ENSMUSG00000027763 | 9496.249242 | 0.258805405 | 0.118306614 | 2.187581877 | 0.028700073 | 0.098929207 |

|                    |             |             |             |             |             |             |
|--------------------|-------------|-------------|-------------|-------------|-------------|-------------|
| ENSMUSG00000019494 | 3227.990434 | 0.258989481 | 0.108971366 | 2.376674636 | 0.01746949  | 0.067022143 |
| ENSMUSG00000052917 | 1851.082248 | 0.25899315  | 0.108123593 | 2.395343539 | 0.016604799 | 0.064344679 |
| ENSMUSG00000004815 | 2896.623227 | 0.259122574 | 0.112631367 | 2.300625313 | 0.021412819 | 0.078734918 |
| ENSMUSG00000024425 | 2036.267457 | 0.259174355 | 0.129019724 | 2.008796388 | 0.044558731 | 0.13882429  |
| ENSMUSG00000048920 | 1054.784305 | 0.259329663 | 0.121005541 | 2.143122218 | 0.032103286 | 0.108098351 |
| ENSMUSG00000040354 | 3985.056709 | 0.259500367 | 0.128124261 | 2.025380397 | 0.042828319 | 0.134674893 |
| ENSMUSG00000029817 | 8687.389698 | 0.25974578  | 0.105469752 | 2.462751396 | 0.013787548 | 0.055813415 |
| ENSMUSG00000021745 | 6626.934322 | 0.259975487 | 0.107614495 | 2.415803615 | 0.015700527 | 0.061698229 |
| ENSMUSG00000049882 | 747.9094414 | 0.260452289 | 0.126870468 | 2.052899247 | 0.04008235  | 0.128283078 |
| ENSMUSG00000032688 | 2560.723125 | 0.260595553 | 0.105485729 | 2.470434214 | 0.013494914 | 0.054767984 |
| ENSMUSG00000021816 | 3348.511637 | 0.260686413 | 0.113589915 | 2.294978494 | 0.021734357 | 0.079628371 |
| ENSMUSG00000022503 | 4086.767927 | 0.260869365 | 0.120984483 | 2.15622167  | 0.03106636  | 0.105210463 |
| ENSMUSG00000042541 | 4763.619611 | 0.260881287 | 0.113603404 | 2.296421379 | 0.0216518   | 0.079404175 |
| ENSMUSG00000022052 | 3876.179325 | 0.261082588 | 0.099658456 | 2.619773571 | 0.008798817 | 0.039231756 |
| ENSMUSG00000031360 | 2771.591766 | 0.261220108 | 0.107609493 | 2.427481997 | 0.015204041 | 0.060171309 |
| ENSMUSG00000017707 | 52007.98972 | 0.261398526 | 0.112497873 | 2.323586391 | 0.020147673 | 0.074898024 |
| ENSMUSG00000040843 | 1889.658083 | 0.261894858 | 0.109137625 | 2.399675251 | 0.016409623 | 0.063832373 |
| ENSMUSG00000040782 | 5400.089818 | 0.261984414 | 0.106730592 | 2.45463282  | 0.014102856 | 0.056811377 |
| ENSMUSG00000029780 | 1766.125685 | 0.262008102 | 0.114134936 | 2.295599499 | 0.021698791 | 0.079531943 |
| ENSMUSG00000026784 | 3887.239134 | 0.262341389 | 0.102489127 | 2.559699699 | 0.010476265 | 0.04496366  |
| ENSMUSG00000000581 | 1490.893087 | 0.262377442 | 0.104497104 | 2.510858487 | 0.012043797 | 0.050072466 |
| ENSMUSG00000066441 | 2743.371266 | 0.262474775 | 0.113403799 | 2.314514827 | 0.020639499 | 0.076446016 |
| ENSMUSG00000063229 | 33872.6606  | 0.262708096 | 0.113206246 | 2.320614851 | 0.02030764  | 0.075353249 |
| ENSMUSG00000022789 | 6885.502633 | 0.262713053 | 0.117525632 | 2.235368137 | 0.02539319  | 0.09011673  |
| ENSMUSG00000026078 | 1931.808099 | 0.263334449 | 0.102592837 | 2.566791776 | 0.010264423 | 0.044277819 |
| ENSMUSG00000073676 | 11154.96808 | 0.263467844 | 0.110955016 | 2.374546485 | 0.017570524 | 0.067291816 |
| ENSMUSG00000038150 | 1220.901177 | 0.263580592 | 0.120284811 | 2.191304037 | 0.028429798 | 0.098296578 |
| ENSMUSG00000037965 | 6444.159667 | 0.263783603 | 0.113808934 | 2.317775889 | 0.020461504 | 0.075824527 |
| ENSMUSG00000034390 | 7828.424294 | 0.263813773 | 0.104534049 | 2.523711423 | 0.011612321 | 0.048696196 |

|                    |             |             |             |             |             |             |
|--------------------|-------------|-------------|-------------|-------------|-------------|-------------|
| ENSMUSG00000030417 | 2173.584638 | 0.264186461 | 0.103381053 | 2.555463043 | 0.010604662 | 0.045409864 |
| ENSMUSG00000054843 | 6005.103203 | 0.264313172 | 0.123968555 | 2.132098512 | 0.032998749 | 0.110446125 |
| ENSMUSG00000028060 | 9125.333227 | 0.26469152  | 0.120176626 | 2.202520807 | 0.027628541 | 0.096137322 |
| ENSMUSG00000014856 | 2147.961468 | 0.264875489 | 0.117685073 | 2.250714398 | 0.024403632 | 0.087261087 |
| ENSMUSG00000032456 | 1332.357709 | 0.265071489 | 0.122866135 | 2.157400724 | 0.030974455 | 0.104962972 |
| ENSMUSG00000025034 | 4808.777429 | 0.265097867 | 0.118735098 | 2.232683277 | 0.025569838 | 0.090585061 |
| ENSMUSG00000025898 | 2272.713742 | 0.266152514 | 0.120916307 | 2.201130034 | 0.02772682  | 0.096404086 |
| ENSMUSG00000035284 | 4492.874095 | 0.266426597 | 0.113515723 | 2.347045759 | 0.018922931 | 0.071319972 |
| ENSMUSG00000003444 | 778.1990103 | 0.266437493 | 0.127232948 | 2.094091958 | 0.036251789 | 0.118837447 |
| ENSMUSG00000108414 | 3727.96157  | 0.26649673  | 0.124956158 | 2.132721868 | 0.032947549 | 0.11034757  |
| ENSMUSG00000034640 | 2468.150458 | 0.266617665 | 0.104781078 | 2.544521112 | 0.01094277  | 0.046580398 |
| ENSMUSG00000038664 | 17455.2751  | 0.266652503 | 0.133982032 | 1.990210912 | 0.046567707 | 0.143499575 |
| ENSMUSG00000020003 | 2222.438938 | 0.26728899  | 0.108864581 | 2.455242911 | 0.014078942 | 0.05672529  |
| ENSMUSG00000063108 | 2263.389513 | 0.267316299 | 0.108836691 | 2.456122998 | 0.014044508 | 0.056630004 |
| ENSMUSG00000031703 | 3194.920323 | 0.267492818 | 0.103339238 | 2.588492258 | 0.009639711 | 0.042168537 |
| ENSMUSG00000019842 | 3961.159322 | 0.26762337  | 0.103093494 | 2.595928804 | 0.009433561 | 0.041445596 |
| ENSMUSG00000053080 | 1105.176557 | 0.267691225 | 0.118840298 | 2.252529072 | 0.024288858 | 0.086916851 |
| ENSMUSG00000022668 | 1085.569623 | 0.268013103 | 0.134323133 | 1.995286271 | 0.046011666 | 0.142198749 |
| ENSMUSG00000073639 | 2539.976267 | 0.268029158 | 0.108884277 | 2.461596532 | 0.013832017 | 0.055952804 |
| ENSMUSG00000020621 | 1133.512797 | 0.268320914 | 0.121437955 | 2.209530905 | 0.027137735 | 0.094903345 |
| ENSMUSG00000017291 | 10019.62962 | 0.268368252 | 0.104271286 | 2.573750278 | 0.010060286 | 0.043555509 |
| ENSMUSG00000038859 | 6766.295417 | 0.268734382 | 0.116812909 | 2.300553808 | 0.021416865 | 0.078736811 |
| ENSMUSG00000022808 | 3081.102898 | 0.268792338 | 0.111692215 | 2.406544968 | 0.016104221 | 0.062929777 |
| ENSMUSG00000015127 | 1049.64992  | 0.268836396 | 0.126376844 | 2.127259937 | 0.033398492 | 0.111383245 |
| ENSMUSG00000025860 | 3700.881981 | 0.269103375 | 0.136861915 | 1.966240029 | 0.049270891 | 0.149576658 |
| ENSMUSG00000044813 | 3306.296246 | 0.269349324 | 0.100041915 | 2.69236473  | 0.007094731 | 0.032969284 |
| ENSMUSG00000029534 | 1159.388745 | 0.269390563 | 0.114941813 | 2.343712496 | 0.019092883 | 0.071875486 |
| ENSMUSG00000003847 | 9579.736123 | 0.269733879 | 0.110281485 | 2.445867313 | 0.014450417 | 0.057918539 |
| ENSMUSG00000009647 | 7018.280628 | 0.269769955 | 0.097662075 | 2.762279577 | 0.00573993  | 0.027761047 |

|                    |             |             |             |             |             |             |
|--------------------|-------------|-------------|-------------|-------------|-------------|-------------|
| ENSMUSG00000062115 | 7004.95275  | 0.269781171 | 0.106794862 | 2.526162455 | 0.011531614 | 0.048448857 |
| ENSMUSG00000036438 | 14490.07447 | 0.269966634 | 0.09733322  | 2.77363303  | 0.005543417 | 0.027003876 |
| ENSMUSG00000002733 | 1610.894486 | 0.270403622 | 0.119643552 | 2.260076846 | 0.023816482 | 0.085693992 |
| ENSMUSG00000035545 | 15216.86178 | 0.270505956 | 0.101000597 | 2.678260953 | 0.007400554 | 0.03416972  |
| ENSMUSG00000025132 | 15269.77577 | 0.270539288 | 0.118837897 | 2.276540519 | 0.022813678 | 0.08275339  |
| ENSMUSG00000040661 | 6137.477546 | 0.270623866 | 0.108140159 | 2.502528835 | 0.012330958 | 0.050972325 |
| ENSMUSG00000007034 | 2540.656404 | 0.270874229 | 0.116058328 | 2.33394909  | 0.019598388 | 0.073222256 |
| ENSMUSG00000025049 | 1396.021155 | 0.270952072 | 0.133228016 | 2.033746947 | 0.041977116 | 0.132746975 |
| ENSMUSG00000029640 | 4916.106067 | 0.27097071  | 0.111112924 | 2.438696603 | 0.014740338 | 0.05879608  |
| ENSMUSG00000021072 | 1749.224036 | 0.271226913 | 0.114764732 | 2.363329814 | 0.018111543 | 0.068984718 |
| ENSMUSG00000037857 | 10196.85743 | 0.271372589 | 0.100234218 | 2.707384695 | 0.006781562 | 0.031818982 |
| ENSMUSG00000029089 | 840.6959437 | 0.271596735 | 0.120555292 | 2.252881076 | 0.024266648 | 0.086879198 |
| ENSMUSG00000041272 | 2802.829735 | 0.27177511  | 0.133228599 | 2.039915687 | 0.041358724 | 0.131363815 |
| ENSMUSG00000022788 | 3494.601217 | 0.272388167 | 0.106691051 | 2.553055423 | 0.01067825  | 0.045654843 |
| ENSMUSG00000063787 | 1887.126507 | 0.272730301 | 0.103207426 | 2.642545326 | 0.008228545 | 0.037199429 |
| ENSMUSG00000030685 | 595.3917928 | 0.273059068 | 0.13279198  | 2.05629187  | 0.039754392 | 0.127452945 |
| ENSMUSG00000029580 | 152870.2841 | 0.273117584 | 0.087523362 | 3.120510643 | 0.001805378 | 0.01081723  |
| ENSMUSG00000026456 | 2492.13669  | 0.27321799  | 0.103369583 | 2.643117838 | 0.008214644 | 0.037159184 |
| ENSMUSG00000035933 | 5561.764847 | 0.27325141  | 0.138272916 | 1.976174499 | 0.048135017 | 0.147029039 |
| ENSMUSG00000049539 | 12392.56395 | 0.273287182 | 0.109277114 | 2.500863834 | 0.01238908  | 0.051136198 |
| ENSMUSG00000029177 | 5657.093221 | 0.273597006 | 0.115802876 | 2.362609781 | 0.018146766 | 0.069048119 |
| ENSMUSG00000036390 | 2931.628997 | 0.273839328 | 0.118647678 | 2.30800412  | 0.020998907 | 0.077468426 |
| ENSMUSG00000057561 | 4743.654385 | 0.273900381 | 0.138443217 | 1.978431214 | 0.047880081 | 0.146430841 |
| ENSMUSG00000068299 | 1368.006437 | 0.273997763 | 0.139573411 | 1.963108597 | 0.049633557 | 0.15032975  |
| ENSMUSG00000021254 | 1462.152788 | 0.274723688 | 0.106352801 | 2.583135439 | 0.009790688 | 0.042653278 |
| ENSMUSG00000036779 | 3080.865523 | 0.27500774  | 0.098542349 | 2.790756893 | 0.005258495 | 0.025864513 |
| ENSMUSG00000041258 | 5525.362083 | 0.275020248 | 0.115156819 | 2.388223728 | 0.016930032 | 0.065366455 |
| ENSMUSG00000032846 | 1617.69296  | 0.27525557  | 0.12522726  | 2.198048329 | 0.027945662 | 0.096968447 |
| ENSMUSG00000006191 | 3544.826113 | 0.275442965 | 0.123457355 | 2.231077807 | 0.025675976 | 0.090860033 |

|                    |             |             |             |             |             |             |
|--------------------|-------------|-------------|-------------|-------------|-------------|-------------|
| ENSMUSG00000026994 | 2504.597474 | 0.275598666 | 0.10554081  | 2.611299519 | 0.009019886 | 0.039974656 |
| ENSMUSG00000032012 | 6032.672241 | 0.27578725  | 0.10725697  | 2.571275783 | 0.01013246  | 0.043816947 |
| ENSMUSG00000040006 | 1370.212323 | 0.275911359 | 0.113391039 | 2.433273052 | 0.014963012 | 0.059475747 |
| ENSMUSG00000021615 | 600.8596081 | 0.276126868 | 0.13242782  | 2.085112247 | 0.037059113 | 0.120495166 |
| ENSMUSG00000022106 | 1448.231579 | 0.276674738 | 0.13833413  | 2.000046827 | 0.045495208 | 0.141071834 |
| ENSMUSG00000025935 | 4294.679418 | 0.276794034 | 0.102089186 | 2.711296324 | 0.00670207  | 0.031497186 |
| ENSMUSG00000048826 | 1907.753121 | 0.276893999 | 0.123582772 | 2.240555012 | 0.025054914 | 0.089171661 |
| ENSMUSG00000031839 | 3947.114092 | 0.277229259 | 0.096016084 | 2.887321025 | 0.003885376 | 0.020164712 |
| ENSMUSG00000028343 | 3411.806369 | 0.277446963 | 0.135914497 | 2.041334582 | 0.041217582 | 0.131088605 |
| ENSMUSG00000028649 | 17092.32919 | 0.27756007  | 0.130927709 | 2.119949035 | 0.034010343 | 0.112950807 |
| ENSMUSG00000075028 | 656.9831049 | 0.278113731 | 0.132246775 | 2.102990646 | 0.035466587 | 0.116623468 |
| ENSMUSG00000063410 | 9992.66018  | 0.27816058  | 0.095190017 | 2.922161248 | 0.003476115 | 0.01846174  |
| ENSMUSG00000019173 | 6606.066712 | 0.278367984 | 0.093641627 | 2.972694866 | 0.002951978 | 0.016214791 |
| ENSMUSG00000020070 | 1046.642249 | 0.278588776 | 0.137788436 | 2.021858901 | 0.043190931 | 0.135585719 |
| ENSMUSG00000030061 | 2619.550052 | 0.278858615 | 0.112549473 | 2.477653663 | 0.013224945 | 0.053897934 |
| ENSMUSG00000042726 | 3013.505941 | 0.279285136 | 0.113445142 | 2.461851868 | 0.013822174 | 0.05593328  |
| ENSMUSG00000030067 | 4984.092931 | 0.279286575 | 0.102551096 | 2.723389464 | 0.006461583 | 0.030561988 |
| ENSMUSG00000045917 | 1193.840583 | 0.279302505 | 0.11307431  | 2.470079234 | 0.013508313 | 0.054794795 |
| ENSMUSG00000044707 | 1758.493665 | 0.279483802 | 0.116768012 | 2.393496284 | 0.01668865  | 0.064613471 |
| ENSMUSG00000050555 | 885.1243945 | 0.279626115 | 0.119420372 | 2.341527741 | 0.019204999 | 0.072200046 |
| ENSMUSG00000036613 | 1173.291211 | 0.279691091 | 0.110538284 | 2.530264461 | 0.011397658 | 0.048076258 |
| ENSMUSG00000026031 | 3011.443332 | 0.279771138 | 0.112075072 | 2.496283368 | 0.01255023  | 0.051638871 |
| ENSMUSG00000031591 | 2137.006577 | 0.279862661 | 0.106610322 | 2.625099101 | 0.008662375 | 0.038713352 |
| ENSMUSG00000024317 | 1343.201253 | 0.28018467  | 0.118600196 | 2.362430066 | 0.018155567 | 0.069068379 |
| ENSMUSG00000037876 | 9065.783817 | 0.280214499 | 0.120362595 | 2.32808622  | 0.019907526 | 0.074178402 |
| ENSMUSG00000045100 | 706.6199265 | 0.280419059 | 0.129491313 | 2.165543415 | 0.030346094 | 0.103162843 |
| ENSMUSG00000036188 | 2117.779551 | 0.28047928  | 0.109559554 | 2.560062263 | 0.010465341 | 0.044925423 |
| ENSMUSG00000001403 | 7124.630733 | 0.280692233 | 0.137736609 | 2.037891274 | 0.041560807 | 0.131879278 |
| ENSMUSG00000015335 | 904.6005065 | 0.28081339  | 0.132196377 | 2.124213962 | 0.033652256 | 0.112011786 |



|                    |             |             |             |             |             |             |
|--------------------|-------------|-------------|-------------|-------------|-------------|-------------|
| ENSMUSG00000027787 | 2705.184149 | 0.280920812 | 0.134165524 | 2.093837547 | 0.036274454 | 0.118880691 |
| ENSMUSG00000020308 | 1304.28913  | 0.281551964 | 0.119940262 | 2.347434951 | 0.018903174 | 0.071281649 |
| ENSMUSG00000006095 | 1672.332862 | 0.281598938 | 0.126462627 | 2.226736418 | 0.025964895 | 0.091664259 |
| ENSMUSG00000055932 | 5568.138319 | 0.282456571 | 0.102105248 | 2.766327649 | 0.005669154 | 0.027472362 |
| ENSMUSG00000079477 | 7463.494392 | 0.282496597 | 0.102926792 | 2.74463618  | 0.006057801 | 0.028934468 |
| ENSMUSG00000028262 | 11903.26126 | 0.282534407 | 0.138415092 | 2.041210995 | 0.041229859 | 0.131108954 |
| ENSMUSG00000019809 | 1180.346047 | 0.282993318 | 0.113591335 | 2.491328402 | 0.012726643 | 0.052249053 |
| ENSMUSG00000114456 | 9849.679261 | 0.283023331 | 0.128578216 | 2.201176376 | 0.02772354  | 0.096404086 |
| ENSMUSG00000033487 | 7257.90845  | 0.283051569 | 0.115051534 | 2.460215508 | 0.013885361 | 0.056106844 |
| ENSMUSG00000027804 | 3806.890577 | 0.283355784 | 0.126333013 | 2.242927466 | 0.024901492 | 0.088753105 |
| ENSMUSG00000071014 | 2284.760338 | 0.283471763 | 0.107402968 | 2.639328956 | 0.008307033 | 0.037501041 |
| ENSMUSG00000038872 | 12645.92296 | 0.283542256 | 0.10657623  | 2.660464305 | 0.0078033   | 0.035645512 |
| ENSMUSG00000026754 | 3977.712432 | 0.283652802 | 0.096215933 | 2.948085546 | 0.003197486 | 0.017290768 |
| ENSMUSG00000028292 | 3061.970864 | 0.284410737 | 0.112747097 | 2.522554849 | 0.011650578 | 0.048798817 |
| ENSMUSG00000024095 | 6175.19782  | 0.284677484 | 0.094143733 | 3.023860153 | 0.002495718 | 0.014136907 |
| ENSMUSG00000061665 | 12744.54145 | 0.285276167 | 0.109092592 | 2.6149912   | 0.008922975 | 0.0396634   |
| ENSMUSG00000049295 | 5454.849339 | 0.285326481 | 0.130543269 | 2.185685124 | 0.02883865  | 0.09929454  |
| ENSMUSG00000030527 | 1467.268674 | 0.285447427 | 0.12122614  | 2.354668935 | 0.018539215 | 0.070182146 |
| ENSMUSG00000073420 | 3992.184025 | 0.285523955 | 0.133956273 | 2.131471318 | 0.033050333 | 0.110569378 |
| ENSMUSG00000024477 | 1504.318843 | 0.285618818 | 0.107013557 | 2.668996576 | 0.007607823 | 0.034917072 |
| ENSMUSG00000068959 | 520.4531707 | 0.285720639 | 0.135718902 | 2.105238356 | 0.035270565 | 0.116081593 |
| ENSMUSG00000031513 | 919.3204358 | 0.285751075 | 0.117607365 | 2.42970391  | 0.015111162 | 0.059856843 |
| ENSMUSG00000004567 | 1993.748134 | 0.286350171 | 0.118606751 | 2.414282229 | 0.015766245 | 0.06190194  |
| ENSMUSG00000031879 | 900.2954375 | 0.286459288 | 0.143581773 | 1.995095072 | 0.046032512 | 0.142243459 |
| ENSMUSG00000054920 | 1384.022692 | 0.286548445 | 0.137931248 | 2.077473008 | 0.037757924 | 0.122389457 |
| ENSMUSG00000021285 | 6347.29054  | 0.286641557 | 0.09391304  | 3.052201866 | 0.002271693 | 0.013071667 |
| ENSMUSG00000038187 | 666.0637327 | 0.286652777 | 0.126510532 | 2.265841214 | 0.023461107 | 0.084653334 |
| ENSMUSG00000056629 | 2043.446642 | 0.286706528 | 0.11242608  | 2.550178101 | 0.01076679  | 0.045976533 |
| ENSMUSG00000008575 | 11920.96807 | 0.286761218 | 0.12270106  | 2.337072044 | 0.019435438 | 0.072796391 |

|                    |             |             |             |             |             |             |
|--------------------|-------------|-------------|-------------|-------------|-------------|-------------|
| ENSMUSG00000029823 | 12169.03791 | 0.286962321 | 0.100864248 | 2.845035059 | 0.004440654 | 0.022491713 |
| ENSMUSG00000032727 | 2095.272676 | 0.287297926 | 0.112194592 | 2.560711005 | 0.010445821 | 0.044867537 |
| ENSMUSG00000043998 | 4105.144186 | 0.287580162 | 0.104030777 | 2.764375784 | 0.005703182 | 0.027607262 |
| ENSMUSG00000025758 | 2682.451993 | 0.287758709 | 0.144123198 | 1.996616185 | 0.045866893 | 0.141910621 |
| ENSMUSG00000028945 | 3815.93879  | 0.288120262 | 0.105038366 | 2.743000238 | 0.006088064 | 0.029054123 |
| ENSMUSG00000021819 | 6085.239273 | 0.288168001 | 0.110218763 | 2.614509492 | 0.008935568 | 0.039703546 |
| ENSMUSG00000028792 | 10929.15382 | 0.288174823 | 0.097712999 | 2.949196377 | 0.003186015 | 0.017237096 |
| ENSMUSG00000061518 | 11581.53471 | 0.288248661 | 0.118887297 | 2.424553923 | 0.015327207 | 0.060583488 |
| ENSMUSG00000062627 | 3284.615811 | 0.288362363 | 0.122033546 | 2.362976193 | 0.018128834 | 0.069026999 |
| ENSMUSG00000047454 | 5120.666375 | 0.288451997 | 0.095133116 | 3.032088187 | 0.002428682 | 0.013806282 |
| ENSMUSG00000030839 | 627.7212967 | 0.289770118 | 0.146458664 | 1.978511267 | 0.047871059 | 0.146423328 |
| ENSMUSG00000049470 | 11805.12353 | 0.289994267 | 0.107269174 | 2.703425918 | 0.006862874 | 0.032119405 |
| ENSMUSG00000038650 | 5560.872055 | 0.290059482 | 0.109111461 | 2.658377764 | 0.007851783 | 0.035793665 |
| ENSMUSG00000037808 | 2829.828682 | 0.29029826  | 0.120700222 | 2.405117871 | 0.01616725  | 0.063070058 |
| ENSMUSG00000070493 | 17589.59542 | 0.290405566 | 0.102852604 | 2.823512056 | 0.004750064 | 0.02381069  |
| ENSMUSG00000002881 | 1657.885329 | 0.290643545 | 0.111433282 | 2.60822926  | 0.009101198 | 0.040291443 |
| ENSMUSG00000024955 | 5992.626464 | 0.290812401 | 0.102438081 | 2.838909116 | 0.004526805 | 0.022855394 |
| ENSMUSG00000027366 | 4003.851455 | 0.290828365 | 0.101983593 | 2.851717179 | 0.004348377 | 0.022124836 |
| ENSMUSG00000028609 | 3051.409286 | 0.290853738 | 0.109985208 | 2.644480486 | 0.008181642 | 0.037032435 |
| ENSMUSG00000090019 | 1128.2334   | 0.291050815 | 0.121662333 | 2.392283695 | 0.016743894 | 0.064782372 |
| ENSMUSG00000036223 | 569.4675012 | 0.291139596 | 0.128988159 | 2.257103273 | 0.024001622 | 0.086221034 |
| ENSMUSG00000039840 | 4374.675965 | 0.291159024 | 0.119601233 | 2.434414893 | 0.014915887 | 0.059346868 |
| ENSMUSG00000079480 | 943.0778429 | 0.291432292 | 0.136898099 | 2.128826439 | 0.033268623 | 0.111109309 |
| ENSMUSG00000033808 | 2754.16108  | 0.291459122 | 0.12325428  | 2.364697781 | 0.018044789 | 0.068777448 |
| ENSMUSG00000077394 | 1735.597575 | 0.291570173 | 0.112533709 | 2.590958523 | 0.009570903 | 0.041908639 |
| ENSMUSG00000026799 | 998.053106  | 0.291995475 | 0.135536885 | 2.1543617   | 0.031211818 | 0.105590829 |
| ENSMUSG00000019923 | 3402.28914  | 0.292051748 | 0.102483798 | 2.849735787 | 0.004375556 | 0.022237756 |
| ENSMUSG00000033735 | 3816.442786 | 0.292077988 | 0.101219043 | 2.885603127 | 0.003906644 | 0.020251529 |
| ENSMUSG00000024870 | 4631.574106 | 0.292189584 | 0.108549948 | 2.691752414 | 0.007107769 | 0.033016112 |

|                    |             |             |             |             |             |             |
|--------------------|-------------|-------------|-------------|-------------|-------------|-------------|
| ENSMUSG00000032562 | 9793.633995 | 0.292224707 | 0.093261807 | 3.13338028  | 0.001728054 | 0.010440892 |
| ENSMUSG00000030284 | 641.295428  | 0.292362344 | 0.148506023 | 1.968690148 | 0.048988683 | 0.148937758 |
| ENSMUSG00000058835 | 4771.092003 | 0.292464841 | 0.099848851 | 2.929075669 | 0.003399716 | 0.01816413  |
| ENSMUSG00000051355 | 1106.197757 | 0.292766392 | 0.12462535  | 2.349172068 | 0.01881521  | 0.071034026 |
| ENSMUSG00000042195 | 2048.78581  | 0.292812484 | 0.105484217 | 2.775889073 | 0.005505099 | 0.026840666 |
| ENSMUSG00000046456 | 950.8966541 | 0.292813525 | 0.122876786 | 2.382984895 | 0.017172899 | 0.066120998 |
| ENSMUSG00000028879 | 3497.266586 | 0.292868362 | 0.098114786 | 2.984956443 | 0.002836187 | 0.015714238 |
| ENSMUSG00000052812 | 6898.987461 | 0.292944755 | 0.111551012 | 2.626105753 | 0.008636798 | 0.038653267 |
| ENSMUSG00000024414 | 1955.25259  | 0.293039286 | 0.111271517 | 2.633551648 | 0.008449698 | 0.037994185 |
| ENSMUSG00000021147 | 1191.818334 | 0.293239848 | 0.112022508 | 2.617686879 | 0.0088528   | 0.039422182 |
| ENSMUSG00000031010 | 15689.31775 | 0.293506616 | 0.12776611  | 2.297218065 | 0.021606333 | 0.079276544 |
| ENSMUSG00000030339 | 6097.843456 | 0.293803256 | 0.115627602 | 2.540943966 | 0.011055364 | 0.046921106 |
| ENSMUSG00000020385 | 4263.818273 | 0.29396972  | 0.101032703 | 2.909649162 | 0.003618347 | 0.019040291 |
| ENSMUSG00000015747 | 1000.292907 | 0.294283023 | 0.11393738  | 2.582848772 | 0.009798826 | 0.042673195 |
| ENSMUSG00000028975 | 1976.56602  | 0.294784013 | 0.141794568 | 2.078951381 | 0.037621819 | 0.122036974 |
| ENSMUSG00000032812 | 5013.199625 | 0.294816307 | 0.10339155  | 2.851454578 | 0.00435197  | 0.022138068 |
| ENSMUSG00000020894 | 1646.667148 | 0.29487158  | 0.107025589 | 2.755150261 | 0.005866519 | 0.028244653 |
| ENSMUSG00000022681 | 1706.724155 | 0.294886309 | 0.113546175 | 2.597060701 | 0.009402531 | 0.041325549 |
| ENSMUSG00000029203 | 3730.287038 | 0.295016484 | 0.106181694 | 2.778411919 | 0.005462532 | 0.026662274 |
| ENSMUSG00000038622 | 1176.776866 | 0.295025414 | 0.127010413 | 2.322844305 | 0.020187518 | 0.07503364  |
| ENSMUSG00000024800 | 582.6861917 | 0.295206173 | 0.150311094 | 1.963967969 | 0.049533807 | 0.150129576 |
| ENSMUSG00000108621 | 1789.946998 | 0.29593271  | 0.130350843 | 2.270278444 | 0.023190694 | 0.083821016 |
| ENSMUSG00000045103 | 2458.175965 | 0.296035074 | 0.123428986 | 2.398424262 | 0.016465781 | 0.063900266 |
| ENSMUSG00000030180 | 9731.436075 | 0.296106866 | 0.109618327 | 2.701253284 | 0.006907871 | 0.032289338 |
| ENSMUSG00000067365 | 771.3222665 | 0.296237472 | 0.134394333 | 2.2042408   | 0.027507414 | 0.095775618 |
| ENSMUSG00000028062 | 2015.497551 | 0.296271509 | 0.144229326 | 2.054169686 | 0.039959271 | 0.127981001 |
| ENSMUSG00000007656 | 2633.940383 | 0.29659267  | 0.108547039 | 2.732388406 | 0.006287697 | 0.029880352 |
| ENSMUSG00000014504 | 1553.021964 | 0.297026851 | 0.115943261 | 2.561829361 | 0.010412246 | 0.044749182 |
| ENSMUSG00000037722 | 1620.294062 | 0.297063306 | 0.109894765 | 2.703161588 | 0.006868335 | 0.032138215 |

|                    |             |             |             |             |             |             |
|--------------------|-------------|-------------|-------------|-------------|-------------|-------------|
| ENSMUSG00000031295 | 2776.173097 | 0.297093575 | 0.113191616 | 2.624695934 | 0.008672638 | 0.038737266 |
| ENSMUSG00000060450 | 2224.45657  | 0.297119943 | 0.111900065 | 2.655225821 | 0.007925533 | 0.03604881  |
| ENSMUSG00000071516 | 12806.80374 | 0.297438119 | 0.13543056  | 2.196240777 | 0.028074714 | 0.097310258 |
| ENSMUSG00000028223 | 2977.048742 | 0.297476712 | 0.118055131 | 2.519811791 | 0.01174176  | 0.049109712 |
| ENSMUSG00000020440 | 4741.1657   | 0.297521435 | 0.107952885 | 2.756030413 | 0.005850756 | 0.028180929 |
| ENSMUSG00000021371 | 2123.305536 | 0.297660455 | 0.099971396 | 2.977456216 | 0.002906512 | 0.016028218 |
| ENSMUSG00000054008 | 3565.010995 | 0.297853479 | 0.110047475 | 2.706590753 | 0.0067978   | 0.031881753 |
| ENSMUSG00000079108 | 484.9482773 | 0.297953801 | 0.147433862 | 2.020931944 | 0.043286811 | 0.135807131 |
| ENSMUSG00000028232 | 827.5571399 | 0.298184824 | 0.137208196 | 2.17322896  | 0.029763089 | 0.101635165 |
| ENSMUSG00000003721 | 658.3385399 | 0.298347339 | 0.127954326 | 2.331670585 | 0.019718027 | 0.073607588 |
| ENSMUSG00000044308 | 7202.479298 | 0.298355172 | 0.117316301 | 2.543168929 | 0.01098521  | 0.046707565 |
| ENSMUSG00000038690 | 11299.90473 | 0.298565229 | 0.115984096 | 2.574191113 | 0.010047476 | 0.043542316 |
| ENSMUSG00000001750 | 8474.518545 | 0.298758253 | 0.125924549 | 2.37251796  | 0.017667304 | 0.067581227 |
| ENSMUSG00000027035 | 21297.86399 | 0.29899048  | 0.117665404 | 2.541022847 | 0.01105287  | 0.046921106 |
| ENSMUSG00000001134 | 857.4452386 | 0.299146916 | 0.137401506 | 2.177173483 | 0.029467626 | 0.100953317 |
| ENSMUSG00000022295 | 2262.374464 | 0.299396062 | 0.103583213 | 2.89039173  | 0.00384762  | 0.020001348 |
| ENSMUSG00000026511 | 2894.946334 | 0.299525534 | 0.118516313 | 2.527293733 | 0.011494532 | 0.04832346  |
| ENSMUSG00000046295 | 2213.134923 | 0.29959268  | 0.108651627 | 2.757369477 | 0.005826847 | 0.028083967 |
| ENSMUSG00000017781 | 8496.123692 | 0.299746126 | 0.100499542 | 2.982562116 | 0.002858466 | 0.015810183 |
| ENSMUSG00000027620 | 21116.44904 | 0.300235911 | 0.101365057 | 2.96192711  | 0.003057201 | 0.016717353 |
| ENSMUSG00000011958 | 2097.792924 | 0.300261258 | 0.118416692 | 2.53563288  | 0.011224434 | 0.04749831  |
| ENSMUSG00000023952 | 4153.087707 | 0.30029756  | 0.123478578 | 2.431981036 | 0.015016494 | 0.059582637 |
| ENSMUSG00000048720 | 1151.801105 | 0.300436297 | 0.124607271 | 2.411065529 | 0.01590599  | 0.062308008 |
| ENSMUSG00000037266 | 22198.24281 | 0.300936214 | 0.125068442 | 2.406172243 | 0.016120662 | 0.062960926 |
| ENSMUSG00000022672 | 6490.912459 | 0.301049939 | 0.150788137 | 1.996509438 | 0.045878499 | 0.141924874 |
| ENSMUSG00000031683 | 2590.124111 | 0.301151948 | 0.102983261 | 2.924280563 | 0.003452534 | 0.018371501 |
| ENSMUSG00000024597 | 120686.1368 | 0.301389679 | 0.125937405 | 2.393170465 | 0.016703479 | 0.064659655 |
| ENSMUSG00000025609 | 5264.103577 | 0.302203424 | 0.104394248 | 2.8948283   | 0.00379366  | 0.019766917 |
| ENSMUSG00000070713 | 577.5862976 | 0.302267234 | 0.148555102 | 2.034714589 | 0.041879599 | 0.13254233  |

|                    |             |             |             |             |             |             |
|--------------------|-------------|-------------|-------------|-------------|-------------|-------------|
| ENSMUSG00000031555 | 2138.831888 | 0.30278965  | 0.101945892 | 2.970101544 | 0.002977013 | 0.016332195 |
| ENSMUSG00000052331 | 807.2280309 | 0.302944593 | 0.149877547 | 2.021280698 | 0.043250716 | 0.135735184 |
| ENSMUSG00000041075 | 5650.344914 | 0.303059347 | 0.108389647 | 2.796017485 | 0.00517366  | 0.02553736  |
| ENSMUSG00000022074 | 830.3068485 | 0.303326877 | 0.13460605  | 2.253441627 | 0.024231317 | 0.086828856 |
| ENSMUSG00000099583 | 9976.341523 | 0.303409871 | 0.126153133 | 2.405091848 | 0.016168402 | 0.063070058 |
| ENSMUSG00000062248 | 3348.652398 | 0.303495922 | 0.126662705 | 2.396095379 | 0.016570778 | 0.064244479 |
| ENSMUSG00000028822 | 1777.667469 | 0.30364255  | 0.140108805 | 2.167191065 | 0.030220288 | 0.102829211 |
| ENSMUSG00000005362 | 1534.999961 | 0.303815153 | 0.114362976 | 2.656586634 | 0.007893617 | 0.035954972 |
| ENSMUSG00000017376 | 1841.160752 | 0.303891371 | 0.108982626 | 2.788438682 | 0.005296277 | 0.026021652 |
| ENSMUSG00000038797 | 583.0609952 | 0.304034995 | 0.153285562 | 1.98345487  | 0.047316643 | 0.145245487 |
| ENSMUSG00000039483 | 1164.372653 | 0.304043438 | 0.14784551  | 2.056494231 | 0.039734902 | 0.127427099 |
| ENSMUSG00000040022 | 571.0195567 | 0.304115358 | 0.139759276 | 2.175994082 | 0.029555703 | 0.101136216 |
| ENSMUSG00000029401 | 1998.825564 | 0.30432314  | 0.115517588 | 2.634431224 | 0.008427838 | 0.037908271 |
| ENSMUSG00000063450 | 40343.48211 | 0.304521763 | 0.134130553 | 2.270338532 | 0.023187051 | 0.083821016 |
| ENSMUSG00000020745 | 8229.349033 | 0.304689388 | 0.098902623 | 3.080700785 | 0.002065141 | 0.012087848 |
| ENSMUSG00000048661 | 3456.933696 | 0.304785114 | 0.117813453 | 2.587014525 | 0.009681151 | 0.042323865 |
| ENSMUSG00000027808 | 7899.167821 | 0.305023341 | 0.109296467 | 2.79078865  | 0.005257979 | 0.025864513 |
| ENSMUSG00000027765 | 2128.747295 | 0.305133859 | 0.10779778  | 2.830613566 | 0.004645881 | 0.023345607 |
| ENSMUSG00000033671 | 17964.84743 | 0.305157626 | 0.125282663 | 2.435753042 | 0.014860826 | 0.059159459 |
| ENSMUSG00000017686 | 3767.732927 | 0.305323418 | 0.129886403 | 2.350695774 | 0.018738347 | 0.070791781 |
| ENSMUSG00000029673 | 10613.0468  | 0.305565046 | 0.11689168  | 2.614087219 | 0.008946619 | 0.039744733 |
| ENSMUSG00000042359 | 3155.913921 | 0.305648412 | 0.111511973 | 2.74094703  | 0.006126238 | 0.029205053 |
| ENSMUSG00000012422 | 1851.842332 | 0.305655759 | 0.127243611 | 2.402130494 | 0.016299893 | 0.063483043 |
| ENSMUSG00000021417 | 3288.039109 | 0.305781797 | 0.130550032 | 2.342257534 | 0.019167484 | 0.072097205 |
| ENSMUSG00000079557 | 1368.230835 | 0.305952647 | 0.106925121 | 2.861372937 | 0.004218105 | 0.021599993 |
| ENSMUSG00000045095 | 9248.715411 | 0.306072265 | 0.099294045 | 3.082483596 | 0.00205281  | 0.012025145 |
| ENSMUSG00000030304 | 2651.095724 | 0.306196666 | 0.108138585 | 2.83152092  | 0.00463272  | 0.023289967 |
| ENSMUSG00000025731 | 2372.456764 | 0.306246456 | 0.121892471 | 2.512431269 | 0.011990246 | 0.049924285 |
| ENSMUSG00000000278 | 2035.371752 | 0.30637771  | 0.104860527 | 2.921763972 | 0.003480552 | 0.018480902 |

|                     |             |             |             |             |             |             |
|---------------------|-------------|-------------|-------------|-------------|-------------|-------------|
| ENSMUSG00000022462  | 18290.41315 | 0.306409067 | 0.109729218 | 2.792410933 | 0.005231687 | 0.025766751 |
| ENSMUSG00000022914  | 13936.69237 | 0.306503761 | 0.103745147 | 2.954391321 | 0.003132865 | 0.017007307 |
| ENSMUSG00000032067  | 3439.768389 | 0.306679046 | 0.10393662  | 2.950635177 | 0.003171212 | 0.017181233 |
| ENSMUSG00000042298  | 1668.863847 | 0.307042875 | 0.123432956 | 2.487527522 | 0.01286345  | 0.052690152 |
| ENSMUSG00000022757  | 4005.679407 | 0.307080081 | 0.102829969 | 2.986289738 | 0.00282385  | 0.015649769 |
| ENSMUSG00000027901  | 6818.30149  | 0.307098389 | 0.120642428 | 2.545525596 | 0.010911336 | 0.04648092  |
| ENSMUSG00000043059  | 1926.487312 | 0.307248482 | 0.106866757 | 2.87506133  | 0.00403949  | 0.020852933 |
| ENSMUSG00000024197  | 4614.296456 | 0.30727845  | 0.12151583  | 2.52871129  | 0.011448216 | 0.048227904 |
| ENSMUSG00000025269  | 1187.838143 | 0.307394199 | 0.112965719 | 2.721128172 | 0.006505953 | 0.030706722 |
| ENSMUSG00000071267  | 1158.713996 | 0.307446178 | 0.139619351 | 2.202031281 | 0.027663099 | 0.096227542 |
| ENSMUSG00000025207  | 22181.73008 | 0.307679241 | 0.14566653  | 2.11221645  | 0.034667888 | 0.114622472 |
| ENSMUSG00000043333  | 333.9387106 | 0.307798503 | 0.153702824 | 2.002555937 | 0.045224973 | 0.14052698  |
| ENSMUSG00000041935  | 2065.331596 | 0.307949734 | 0.146942572 | 2.095714885 | 0.036107491 | 0.11841664  |
| ENSMUSG00000010376  | 4030.078678 | 0.307990542 | 0.127304777 | 2.419316455 | 0.015549706 | 0.061251264 |
| ENSMUSG00000024646  | 7341.86697  | 0.308343337 | 0.098915608 | 3.117236436 | 0.001825551 | 0.010926359 |
| ENSMUSG000000105987 | 10750.27024 | 0.308475878 | 0.152851914 | 2.018135533 | 0.043577148 | 0.136461565 |
| ENSMUSG00000027427  | 1213.944987 | 0.308485968 | 0.150526051 | 2.049385917 | 0.040424393 | 0.129062905 |
| ENSMUSG00000050002  | 1559.599719 | 0.308784562 | 0.124287732 | 2.484433153 | 0.012975787 | 0.053095967 |
| ENSMUSG00000030465  | 7699.139112 | 0.309020921 | 0.101795139 | 3.035713937 | 0.002399669 | 0.013669227 |
| ENSMUSG00000024298  | 4498.707428 | 0.309081745 | 0.106911746 | 2.890998934 | 0.003840194 | 0.019976714 |
| ENSMUSG00000035171  | 1272.113571 | 0.309619452 | 0.113307564 | 2.732557658 | 0.006284467 | 0.029880352 |
| ENSMUSG00000021706  | 1384.431914 | 0.309659255 | 0.127908634 | 2.420940995 | 0.01548039  | 0.061040613 |
| ENSMUSG00000028530  | 14056.20569 | 0.310052303 | 0.108942424 | 2.84601987  | 0.004426943 | 0.022427365 |
| ENSMUSG00000022020  | 2233.709786 | 0.310562902 | 0.130916827 | 2.372215314 | 0.017681783 | 0.067622353 |
| ENSMUSG00000041685  | 6001.609041 | 0.310627579 | 0.114134138 | 2.721600967 | 0.006496654 | 0.03068881  |
| ENSMUSG00000026617  | 8018.81515  | 0.31065246  | 0.108457228 | 2.864285437 | 0.004179512 | 0.021446686 |
| ENSMUSG00000039741  | 5623.327642 | 0.310747755 | 0.10890032  | 2.853506352 | 0.004323966 | 0.022020729 |
| ENSMUSG00000060073  | 4866.112631 | 0.310761294 | 0.116715163 | 2.662561454 | 0.007754841 | 0.035475016 |
| ENSMUSG00000022540  | 597.0727692 | 0.311189431 | 0.151340079 | 2.056226171 | 0.039760721 | 0.127454914 |

|                     |             |             |             |             |             |             |
|---------------------|-------------|-------------|-------------|-------------|-------------|-------------|
| ENSMUSG00000020132  | 2718.203048 | 0.31142106  | 0.10586165  | 2.941774098 | 0.003263379 | 0.017576111 |
| ENSMUSG00000021028  | 710.0361005 | 0.311516488 | 0.140839244 | 2.211858561 | 0.026976439 | 0.094610513 |
| ENSMUSG00000007617  | 3593.422534 | 0.311715433 | 0.10895758  | 2.860888007 | 0.004224563 | 0.021618167 |
| ENSMUSG00000027381  | 1919.488372 | 0.311793908 | 0.139841718 | 2.229620122 | 0.025772673 | 0.091115469 |
| ENSMUSG000000051285 | 1451.415954 | 0.312680421 | 0.133656136 | 2.339439338 | 0.019312708 | 0.072482782 |
| ENSMUSG00000018474  | 12139.52194 | 0.31270354  | 0.129193975 | 2.420418906 | 0.015502637 | 0.061114425 |
| ENSMUSG00000022674  | 522.5584053 | 0.313148359 | 0.143090278 | 2.188467053 | 0.028635599 | 0.09878436  |
| ENSMUSG00000024993  | 734.974844  | 0.313185795 | 0.127959531 | 2.447537844 | 0.014383602 | 0.057712973 |
| ENSMUSG00000046230  | 9037.322132 | 0.313338979 | 0.135413391 | 2.313943817 | 0.020670804 | 0.076542844 |
| ENSMUSG000000032014 | 887.4265766 | 0.313453245 | 0.134019776 | 2.338858151 | 0.019342776 | 0.072539342 |
| ENSMUSG00000019806  | 4308.606538 | 0.313839469 | 0.121260454 | 2.588143613 | 0.009649474 | 0.042202966 |
| ENSMUSG00000022664  | 697.2768964 | 0.313868217 | 0.152515919 | 2.057937418 | 0.039596141 | 0.127128354 |
| ENSMUSG00000028556  | 10843.89696 | 0.314266919 | 0.1191529   | 2.637509608 | 0.008351726 | 0.037626634 |
| ENSMUSG00000003531  | 1162.463616 | 0.314547144 | 0.121309683 | 2.592926933 | 0.009516299 | 0.041726892 |
| ENSMUSG00000006782  | 2757.442359 | 0.314685606 | 0.135134784 | 2.328679528 | 0.019876049 | 0.074110647 |
| ENSMUSG00000045314  | 2894.754537 | 0.314745347 | 0.101454419 | 3.102332542 | 0.001920021 | 0.011394161 |
| ENSMUSG00000017057  | 2055.586947 | 0.314826657 | 0.13658127  | 2.305050005 | 0.021163773 | 0.077960572 |
| ENSMUSG00000022021  | 4189.621851 | 0.314959521 | 0.134183681 | 2.347226718 | 0.018913742 | 0.071309444 |
| ENSMUSG000000036513 | 1316.853648 | 0.315077655 | 0.118330049 | 2.662701973 | 0.007751603 | 0.035474761 |
| ENSMUSG00000021076  | 2106.895849 | 0.315304758 | 0.106003638 | 2.974471092 | 0.002934941 | 0.016145072 |
| ENSMUSG000000064363 | 146204.7135 | 0.315317501 | 0.146481401 | 2.152611169 | 0.03134925  | 0.105943268 |
| ENSMUSG000000062933 | 6820.98386  | 0.315374458 | 0.12557961  | 2.511350839 | 0.01202701  | 0.050039991 |
| ENSMUSG00000015880  | 4273.801113 | 0.315395987 | 0.158874075 | 1.985194797 | 0.047122803 | 0.144789974 |
| ENSMUSG00000028126  | 2134.322306 | 0.315468989 | 0.106922338 | 2.950449772 | 0.003173116 | 0.017183989 |
| ENSMUSG000000069301 | 5070.607434 | 0.315770569 | 0.148092294 | 2.132255236 | 0.03298587  | 0.110419977 |
| ENSMUSG00000027341  | 1980.263815 | 0.31587343  | 0.120436879 | 2.622730127 | 0.008722834 | 0.038944527 |
| ENSMUSG00000078570  | 1343.115244 | 0.316110754 | 0.124719912 | 2.534565236 | 0.011258696 | 0.047589117 |
| ENSMUSG00000028161  | 4720.850218 | 0.316117435 | 0.110312584 | 2.865651628 | 0.004161519 | 0.02138388  |
| ENSMUSG00000049932  | 16594.77858 | 0.316147409 | 0.107887222 | 2.93035081  | 0.003385795 | 0.018107103 |

|                    |             |             |             |             |             |             |
|--------------------|-------------|-------------|-------------|-------------|-------------|-------------|
| ENSMUSG00000065037 | 1146641.804 | 0.31620691  | 0.154166244 | 2.05107747  | 0.040259403 | 0.128683524 |
| ENSMUSG00000028399 | 9337.969018 | 0.316220421 | 0.127047723 | 2.488989286 | 0.012810683 | 0.052516734 |
| ENSMUSG00000026219 | 15225.12732 | 0.31631462  | 0.10626787  | 2.976578164 | 0.002914848 | 0.016054339 |
| ENSMUSG00000030172 | 4678.896162 | 0.316626952 | 0.103760505 | 3.051517082 | 0.002276881 | 0.013093533 |
| ENSMUSG00000022558 | 4685.387847 | 0.316968069 | 0.106630304 | 2.97258901  | 0.002952996 | 0.01621639  |
| ENSMUSG00000073792 | 1369.188612 | 0.317025379 | 0.113255997 | 2.79919286  | 0.005123053 | 0.025332417 |
| ENSMUSG00000003955 | 1994.231832 | 0.317064099 | 0.114953942 | 2.758183783 | 0.005812351 | 0.028044405 |
| ENSMUSG00000045576 | 2577.362477 | 0.317204605 | 0.109189667 | 2.905078953 | 0.003671605 | 0.019256928 |
| ENSMUSG00000006315 | 2829.154514 | 0.317708235 | 0.134518287 | 2.361821894 | 0.018185377 | 0.069147841 |
| ENSMUSG00000029190 | 3074.854648 | 0.317737429 | 0.112137799 | 2.833455206 | 0.004604776 | 0.023175606 |
| ENSMUSG00000022533 | 13254.49609 | 0.317991824 | 0.142095145 | 2.237879578 | 0.025228909 | 0.089705023 |
| ENSMUSG00000021357 | 2362.876342 | 0.318057562 | 0.119514448 | 2.661247792 | 0.007785164 | 0.035577242 |
| ENSMUSG00000037894 | 23987.4968  | 0.31826372  | 0.108793868 | 2.925382886 | 0.003440326 | 0.018319656 |
| ENSMUSG00000006476 | 3258.753097 | 0.318742692 | 0.109658687 | 2.906679805 | 0.003652869 | 0.019181217 |
| ENSMUSG00000021704 | 1888.219164 | 0.31892926  | 0.139714728 | 2.282717535 | 0.022447012 | 0.081742459 |
| ENSMUSG00000019951 | 4414.800803 | 0.319046513 | 0.124456958 | 2.563508846 | 0.010362006 | 0.044606249 |
| ENSMUSG00000059363 | 1436.245902 | 0.319190542 | 0.112838988 | 2.828725666 | 0.004673374 | 0.02346261  |
| ENSMUSG00000066979 | 5438.950873 | 0.319317612 | 0.099846377 | 3.198089121 | 0.001383415 | 0.008671035 |
| ENSMUSG00000019189 | 4083.554169 | 0.319756606 | 0.128099691 | 2.496154399 | 0.012554794 | 0.051648121 |
| ENSMUSG00000001666 | 647.9621826 | 0.319762662 | 0.149386289 | 2.140508774 | 0.032313673 | 0.108675495 |
| ENSMUSG00000016487 | 2849.289814 | 0.32003697  | 0.120967177 | 2.645651299 | 0.008153382 | 0.036919505 |
| ENSMUSG00000003746 | 8990.060539 | 0.320210537 | 0.102434839 | 3.125992484 | 0.001772061 | 0.010650163 |
| ENSMUSG00000000001 | 6906.222311 | 0.320260408 | 0.095833762 | 3.341832787 | 0.000832272 | 0.005702149 |
| ENSMUSG00000002055 | 8558.233386 | 0.320273791 | 0.130395475 | 2.45617259  | 0.01404257  | 0.056630004 |
| ENSMUSG00000039361 | 22646.6285  | 0.320375172 | 0.123329309 | 2.597721289 | 0.009384463 | 0.041286824 |
| ENSMUSG00000033147 | 470.7910004 | 0.320435614 | 0.145795951 | 2.197836162 | 0.027960783 | 0.097005823 |
| ENSMUSG00000003382 | 4458.647403 | 0.321045672 | 0.135182316 | 2.374908803 | 0.017553287 | 0.067260454 |
| ENSMUSG00000028034 | 13156.28541 | 0.321272681 | 0.124370945 | 2.583181149 | 0.009789391 | 0.042653278 |
| ENSMUSG00000028098 | 1919.746025 | 0.321327295 | 0.106666888 | 3.012437143 | 0.002591591 | 0.01460209  |



|                    |             |             |             |             |             |             |
|--------------------|-------------|-------------|-------------|-------------|-------------|-------------|
| ENSMUSG00000049969 | 1602.039383 | 0.321367952 | 0.133830789 | 2.401300594 | 0.01633691  | 0.063593897 |
| ENSMUSG00000026878 | 6653.762826 | 0.321405256 | 0.10090331  | 3.185279606 | 0.001446142 | 0.008990916 |
| ENSMUSG00000030469 | 589.77662   | 0.321827556 | 0.130190961 | 2.471965438 | 0.013437251 | 0.054573689 |
| ENSMUSG00000024140 | 1661.26903  | 0.322052746 | 0.128871157 | 2.499028909 | 0.012453415 | 0.051344724 |
| ENSMUSG00000059713 | 586.3394979 | 0.322864449 | 0.143450756 | 2.250698835 | 0.024404619 | 0.087261087 |
| ENSMUSG00000042364 | 2448.419797 | 0.322993579 | 0.14901689  | 2.167496451 | 0.03019702  | 0.102781402 |
| ENSMUSG00000041028 | 8854.377279 | 0.323333489 | 0.102468599 | 3.155439748 | 0.001602564 | 0.009815647 |
| ENSMUSG00000022707 | 654.327425  | 0.323389551 | 0.127581755 | 2.534763305 | 0.011252333 | 0.047578792 |
| ENSMUSG00000031592 | 11145.1056  | 0.323557342 | 0.1259988   | 2.567939863 | 0.01023049  | 0.04417154  |
| ENSMUSG00000041225 | 4998.306497 | 0.32375394  | 0.096197368 | 3.36551765  | 0.000764002 | 0.005288021 |
| ENSMUSG00000071350 | 1317.946899 | 0.324172271 | 0.165281017 | 1.961340009 | 0.049839373 | 0.150748387 |
| ENSMUSG00000005836 | 10704.57421 | 0.324238689 | 0.103522909 | 3.132047691 | 0.001735917 | 0.010471377 |
| ENSMUSG00000041483 | 996.5620004 | 0.324409751 | 0.124569082 | 2.604255764 | 0.009207402 | 0.040665338 |
| ENSMUSG00000029538 | 2904.488217 | 0.32478029  | 0.102828821 | 3.158455851 | 0.001586073 | 0.00973068  |
| ENSMUSG00000057506 | 1516.4453   | 0.325043828 | 0.105287046 | 3.087215756 | 0.002020409 | 0.011879024 |
| ENSMUSG00000031246 | 3855.609326 | 0.325290601 | 0.103843718 | 3.132501484 | 0.001733236 | 0.010460862 |
| ENSMUSG00000020258 | 448.9941732 | 0.325358523 | 0.165572266 | 1.96505448  | 0.049407932 | 0.149829521 |
| ENSMUSG00000019802 | 5876.507043 | 0.325406067 | 0.115569316 | 2.81567875  | 0.004867431 | 0.024294669 |
| ENSMUSG00000027282 | 9929.369489 | 0.325916176 | 0.096433569 | 3.379696296 | 0.00072566  | 0.005065082 |
| ENSMUSG00000018287 | 2280.316305 | 0.326099047 | 0.10925079  | 2.984866703 | 0.002837019 | 0.015714944 |
| ENSMUSG00000024242 | 5509.902144 | 0.32642593  | 0.109294034 | 2.98667655  | 0.002820279 | 0.015633868 |
| ENSMUSG00000020273 | 1275.279598 | 0.32720286  | 0.133409657 | 2.452617507 | 0.014182105 | 0.05706877  |
| ENSMUSG00000029432 | 3222.613717 | 0.327316351 | 0.11742747  | 2.787391668 | 0.005313422 | 0.026067723 |
| ENSMUSG00000020986 | 3492.462246 | 0.327476149 | 0.112627158 | 2.90761265  | 0.003641991 | 0.019137618 |
| ENSMUSG00000046311 | 2796.779892 | 0.327673886 | 0.113104471 | 2.897090469 | 0.003766411 | 0.019657088 |
| ENSMUSG00000000708 | 2930.174223 | 0.32813347  | 0.10338348  | 3.173944918 | 0.001503822 | 0.00929253  |
| ENSMUSG00000021774 | 1890.1882   | 0.328217831 | 0.131021706 | 2.505064556 | 0.012242905 | 0.050711184 |
| ENSMUSG00000043162 | 1119.75618  | 0.329076602 | 0.120436194 | 2.732372981 | 0.006287991 | 0.029880352 |
| ENSMUSG00000040128 | 8620.242626 | 0.329263259 | 0.144269261 | 2.282282834 | 0.022472647 | 0.081809094 |

|                    |             |             |             |             |             |             |
|--------------------|-------------|-------------|-------------|-------------|-------------|-------------|
| ENSMUSG00000038975 | 3780.865247 | 0.329459124 | 0.107697169 | 3.059125202 | 0.002219844 | 0.012831709 |
| ENSMUSG00000060090 | 1694.650825 | 0.329471074 | 0.108804588 | 3.028099099 | 0.002460974 | 0.01397204  |
| ENSMUSG00000002108 | 1421.089514 | 0.329561121 | 0.128761892 | 2.559461629 | 0.010483443 | 0.044985811 |
| ENSMUSG00000050310 | 6024.386395 | 0.329854403 | 0.117739421 | 2.801562978 | 0.005085571 | 0.025186171 |
| ENSMUSG00000020828 | 2127.795667 | 0.329864326 | 0.118467793 | 2.784421971 | 0.005362322 | 0.02628245  |
| ENSMUSG00000005087 | 12093.20064 | 0.330098822 | 0.12240306  | 2.696818373 | 0.007000544 | 0.032626779 |
| ENSMUSG00000020029 | 4289.170186 | 0.330766606 | 0.111995895 | 2.953381522 | 0.003143132 | 0.017054743 |
| ENSMUSG00000031924 | 13117.94575 | 0.33120674  | 0.123110459 | 2.690321713 | 0.007138317 | 0.033144201 |
| ENSMUSG00000020777 | 6461.983593 | 0.331377088 | 0.124007957 | 2.672224397 | 0.007535024 | 0.034639987 |
| ENSMUSG00000097867 | 616.6996968 | 0.331437361 | 0.158890021 | 2.085954539 | 0.036982741 | 0.120349061 |
| ENSMUSG00000021224 | 4435.89722  | 0.331568366 | 0.096474069 | 3.436865153 | 0.000588489 | 0.004256854 |
| ENSMUSG00000046417 | 1296.703291 | 0.331842022 | 0.111103428 | 2.988644781 | 0.002802177 | 0.015564471 |
| ENSMUSG00000024048 | 6978.981617 | 0.3321128   | 0.090694768 | 3.661873857 | 0.000250377 | 0.002032639 |
| ENSMUSG00000004394 | 3924.488758 | 0.332265334 | 0.10875803  | 3.055087836 | 0.002249946 | 0.012972091 |
| ENSMUSG00000028992 | 834.1121242 | 0.332507042 | 0.139706202 | 2.380044965 | 0.017310526 | 0.066528837 |
| ENSMUSG00000032551 | 879.4328421 | 0.332791408 | 0.122002799 | 2.727735844 | 0.006377065 | 0.030219918 |
| ENSMUSG00000026571 | 2806.501557 | 0.332931416 | 0.10789852  | 3.085597627 | 0.002031435 | 0.01192499  |
| ENSMUSG00000020640 | 8490.734944 | 0.332970462 | 0.121273842 | 2.745608255 | 0.006039884 | 0.028874598 |
| ENSMUSG00000042043 | 4235.49876  | 0.333058944 | 0.100674997 | 3.308258785 | 0.00093878  | 0.006315456 |
| ENSMUSG00000008475 | 5662.524022 | 0.333075449 | 0.092216664 | 3.611879174 | 0.000303986 | 0.002415964 |
| ENSMUSG00000020956 | 653.6595995 | 0.333105622 | 0.154545579 | 2.155387591 | 0.031131517 | 0.105415116 |
| ENSMUSG00000031532 | 3273.872729 | 0.333174484 | 0.137995697 | 2.414383136 | 0.015761878 | 0.061895695 |
| ENSMUSG00000040297 | 3032.180375 | 0.333294037 | 0.130700706 | 2.550055378 | 0.010770581 | 0.045976533 |
| ENSMUSG00000093930 | 8438.107808 | 0.333474724 | 0.119602703 | 2.788187177 | 0.005300391 | 0.026024663 |
| ENSMUSG00000021591 | 4277.778835 | 0.333765952 | 0.132525897 | 2.518496091 | 0.011785719 | 0.049265853 |
| ENSMUSG00000017697 | 1384.539618 | 0.333782167 | 0.115325135 | 2.894270753 | 0.003800403 | 0.019795782 |
| ENSMUSG00000044712 | 466.4652727 | 0.334158086 | 0.141290308 | 2.365046054 | 0.018027829 | 0.068736299 |
| ENSMUSG00000021520 | 4359.932589 | 0.334443319 | 0.12194964  | 2.742470739 | 0.006097888 | 0.029094781 |
| ENSMUSG00000036097 | 6591.83506  | 0.334510509 | 0.105013237 | 3.185412802 | 0.001445477 | 0.008989284 |

|                    |             |             |             |             |             |             |
|--------------------|-------------|-------------|-------------|-------------|-------------|-------------|
| ENSMUSG00000052397 | 18033.5738  | 0.334705686 | 0.09782177  | 3.421586881 | 0.000622568 | 0.004459973 |
| ENSMUSG00000052310 | 5602.413795 | 0.334861713 | 0.110604072 | 3.027571276 | 0.002465276 | 0.013989342 |
| ENSMUSG00000041997 | 8784.901416 | 0.335035253 | 0.09967579  | 3.361250025 | 0.000775906 | 0.005357111 |
| ENSMUSG00000032373 | 5171.138336 | 0.335812798 | 0.125539333 | 2.674960822 | 0.007473798 | 0.03440817  |
| ENSMUSG00000076437 | 1939.686973 | 0.336000598 | 0.103879469 | 3.234523647 | 0.001218458 | 0.007806044 |
| ENSMUSG00000073725 | 1788.190858 | 0.336357366 | 0.110752084 | 3.037029673 | 0.002389219 | 0.013623621 |
| ENSMUSG00000035027 | 10841.18248 | 0.336676203 | 0.096876988 | 3.475295924 | 0.00051029  | 0.003775706 |
| ENSMUSG00000022378 | 3055.910544 | 0.336748416 | 0.102272392 | 3.292661959 | 0.000992437 | 0.006600758 |
| ENSMUSG00000015112 | 1853.342925 | 0.336777288 | 0.112203    | 3.00149985  | 0.002686532 | 0.015045792 |
| ENSMUSG00000069268 | 6824.281322 | 0.33682505  | 0.123452658 | 2.728374214 | 0.006364736 | 0.030167901 |
| ENSMUSG00000085334 | 1003.899115 | 0.337180553 | 0.155084035 | 2.174179653 | 0.029691646 | 0.101495002 |
| ENSMUSG00000026610 | 6333.858813 | 0.337424282 | 0.108868335 | 3.099379468 | 0.001939265 | 0.011495891 |
| ENSMUSG00000038717 | 4579.631932 | 0.337467748 | 0.123796473 | 2.725988384 | 0.006410925 | 0.030341691 |
| ENSMUSG00000000416 | 5349.239614 | 0.337576191 | 0.13680806  | 2.467516826 | 0.013605383 | 0.055146063 |
| ENSMUSG00000025137 | 8680.69513  | 0.337803331 | 0.116515958 | 2.899202283 | 0.003741134 | 0.019552622 |
| ENSMUSG00000064354 | 1751.899919 | 0.337909673 | 0.160522226 | 2.105064706 | 0.035285676 | 0.116114189 |
| ENSMUSG00000032558 | 1200.659936 | 0.338538433 | 0.125257479 | 2.702740271 | 0.006877046 | 0.032161584 |
| ENSMUSG00000025531 | 1179.026432 | 0.338699843 | 0.122227604 | 2.771058508 | 0.005587439 | 0.027135337 |
| ENSMUSG00000036402 | 4403.539391 | 0.338722816 | 0.108156534 | 3.131783201 | 0.001737481 | 0.010474929 |
| ENSMUSG00000032120 | 1687.770198 | 0.338989842 | 0.138411534 | 2.449144463 | 0.0143196   | 0.057507906 |
| ENSMUSG00000034163 | 11010.32626 | 0.339049672 | 0.123569092 | 2.743806464 | 0.006073133 | 0.028995278 |
| ENSMUSG00000026319 | 7221.411826 | 0.339082069 | 0.111505573 | 3.0409428   | 0.002358386 | 0.013489195 |
| ENSMUSG00000032609 | 924.2929312 | 0.339194664 | 0.154284443 | 2.198502055 | 0.027913348 | 0.096886472 |
| ENSMUSG00000019804 | 4523.920408 | 0.339283006 | 0.111851317 | 3.033339384 | 0.002418634 | 0.013759684 |
| ENSMUSG00000040883 | 982.6304067 | 0.339319267 | 0.127582929 | 2.659597719 | 0.007823403 | 0.03570078  |
| ENSMUSG00000009013 | 6345.507899 | 0.339428101 | 0.134257944 | 2.528178901 | 0.011465591 | 0.048271502 |
| ENSMUSG00000039578 | 7944.679438 | 0.340409026 | 0.159898356 | 2.128908861 | 0.033261802 | 0.111109309 |
| ENSMUSG00000032265 | 3070.318397 | 0.340449635 | 0.118033408 | 2.884349784 | 0.003922228 | 0.020318145 |
| ENSMUSG00000058704 | 2168.901758 | 0.340521725 | 0.106310221 | 3.203094897 | 0.001359592 | 0.008548141 |

|                    |             |             |             |             |             |             |
|--------------------|-------------|-------------|-------------|-------------|-------------|-------------|
| ENSMUSG00000027287 | 1815.543157 | 0.340700575 | 0.10890118  | 3.128529686 | 0.001756833 | 0.010568957 |
| ENSMUSG00000014786 | 1182.769762 | 0.340952663 | 0.141284982 | 2.413226498 | 0.01581199  | 0.062026947 |
| ENSMUSG00000032384 | 3954.596392 | 0.341127656 | 0.11217325  | 3.04107846  | 0.002357324 | 0.013486578 |
| ENSMUSG00000035851 | 4893.729245 | 0.341264528 | 0.103141879 | 3.308690255 | 0.000937335 | 0.006307635 |
| ENSMUSG00000063760 | 1613.732856 | 0.34156783  | 0.104315108 | 3.274385049 | 0.001058922 | 0.006980497 |
| ENSMUSG00000062232 | 4510.665825 | 0.341713014 | 0.10469547  | 3.263875822 | 0.001098993 | 0.007197991 |
| ENSMUSG00000049562 | 1037.451353 | 0.341951027 | 0.138920988 | 2.461478509 | 0.013836569 | 0.055953512 |
| ENSMUSG00000030727 | 1685.447828 | 0.34223951  | 0.109745313 | 3.118488608 | 0.001817812 | 0.010882958 |
| ENSMUSG00000020219 | 3677.928348 | 0.342248926 | 0.135656305 | 2.522912041 | 0.011638751 | 0.048770346 |
| ENSMUSG00000019579 | 3019.234863 | 0.342297838 | 0.117909266 | 2.903061384 | 0.003695342 | 0.01936321  |
| ENSMUSG00000021252 | 2091.520062 | 0.342534232 | 0.112602103 | 3.041987874 | 0.002350214 | 0.013452186 |
| ENSMUSG00000021823 | 8032.968103 | 0.342835422 | 0.112422221 | 3.049534342 | 0.002291964 | 0.013170084 |
| ENSMUSG00000007036 | 2764.126321 | 0.342880902 | 0.115881661 | 2.958888406 | 0.003087509 | 0.016821512 |
| ENSMUSG00000022194 | 3766.249481 | 0.343130705 | 0.104891789 | 3.271282787 | 0.001070608 | 0.007042958 |
| ENSMUSG00000000804 | 3351.944409 | 0.343146493 | 0.122243449 | 2.807074693 | 0.004999365 | 0.024819865 |
| ENSMUSG00000051149 | 749.3499292 | 0.343216372 | 0.138317343 | 2.481369034 | 0.01308788  | 0.053476145 |
| ENSMUSG00000030516 | 10974.51675 | 0.343292776 | 0.100060995 | 3.430835109 | 0.000601726 | 0.004331535 |
| ENSMUSG00000026987 | 12417.75944 | 0.343665438 | 0.105324294 | 3.262926579 | 0.001102681 | 0.007217753 |
| ENSMUSG00000033684 | 5970.224901 | 0.343839361 | 0.146442783 | 2.347943372 | 0.018877391 | 0.071210233 |
| ENSMUSG00000020246 | 979.3758273 | 0.343965556 | 0.119185708 | 2.885963113 | 0.003902179 | 0.020237789 |
| ENSMUSG00000020544 | 674.1156831 | 0.344042202 | 0.146889742 | 2.342179906 | 0.019171471 | 0.072097205 |
| ENSMUSG00000022884 | 22190.13027 | 0.34413314  | 0.10075139  | 3.415666423 | 0.000636261 | 0.004543473 |
| ENSMUSG00000024132 | 3911.655852 | 0.344421081 | 0.130891558 | 2.63134679  | 0.00850472  | 0.038184773 |
| ENSMUSG00000037234 | 2688.490755 | 0.344434817 | 0.123373791 | 2.791798937 | 0.005241592 | 0.025804135 |
| ENSMUSG00000037049 | 461.0161116 | 0.345120494 | 0.16198509  | 2.130569513 | 0.033124623 | 0.110768065 |
| ENSMUSG00000020527 | 5359.943928 | 0.345130453 | 0.12429813  | 2.776634314 | 0.005492494 | 0.026790923 |
| ENSMUSG00000079426 | 5063.527701 | 0.34517     | 0.106058225 | 3.254533065 | 0.001135789 | 0.007382465 |
| ENSMUSG00000032560 | 12355.74436 | 0.345244041 | 0.122540969 | 2.817376459 | 0.004841774 | 0.024204527 |
| ENSMUSG00000015714 | 4124.602369 | 0.345320983 | 0.11444548  | 3.017340505 | 0.002550032 | 0.014411622 |

|                    |             |             |             |             |             |             |
|--------------------|-------------|-------------|-------------|-------------|-------------|-------------|
| ENSMUSG00000000134 | 2460.889279 | 0.345511872 | 0.103559454 | 3.336362423 | 0.000848824 | 0.005803075 |
| ENSMUSG00000022507 | 3554.066167 | 0.345527277 | 0.112720906 | 3.065334454 | 0.002174267 | 0.01260747  |
| ENSMUSG00000053205 | 1737.312268 | 0.345716948 | 0.108843765 | 3.176267807 | 0.001491832 | 0.009231226 |
| ENSMUSG00000039156 | 3080.2379   | 0.346091108 | 0.108187931 | 3.198980737 | 0.001379144 | 0.008646693 |
| ENSMUSG00000031781 | 2519.535284 | 0.34614565  | 0.1191086   | 2.906134823 | 0.003659237 | 0.019204216 |
| ENSMUSG00000005575 | 4671.80165  | 0.346449084 | 0.110290359 | 3.141245402 | 0.00168231  | 0.010208761 |
| ENSMUSG00000035173 | 2544.958349 | 0.346468952 | 0.106548991 | 3.251733781 | 0.001147034 | 0.007446872 |
| ENSMUSG00000030060 | 1255.253969 | 0.346698017 | 0.113806403 | 3.046384112 | 0.002316117 | 0.013271258 |
| ENSMUSG00000095403 | 404.2532522 | 0.346767199 | 0.153515724 | 2.258838312 | 0.023893444 | 0.085891518 |
| ENSMUSG00000064120 | 3359.786385 | 0.346958406 | 0.133232239 | 2.604162535 | 0.009209907 | 0.040665338 |
| ENSMUSG00000031016 | 5502.120651 | 0.347209002 | 0.103226011 | 3.363580527 | 0.000769384 | 0.005317022 |
| ENSMUSG00000029407 | 4627.278355 | 0.34724106  | 0.113830811 | 3.050501507 | 0.002284595 | 0.013134509 |
| ENSMUSG00000071369 | 4672.687074 | 0.347336055 | 0.12122747  | 2.865159652 | 0.00416799  | 0.021402338 |
| ENSMUSG00000026417 | 284250.732  | 0.347519715 | 0.11971426  | 2.902909928 | 0.00369713  | 0.019368026 |
| ENSMUSG00000040044 | 1911.253947 | 0.347552519 | 0.124645673 | 2.788323985 | 0.005298153 | 0.026024663 |
| ENSMUSG00000038903 | 535.539042  | 0.347627741 | 0.17477428  | 1.989009709 | 0.046700131 | 0.143828149 |
| ENSMUSG00000032253 | 10924.69687 | 0.347637074 | 0.112939592 | 3.078079765 | 0.002083391 | 0.012173413 |
| ENSMUSG00000023068 | 4659.845225 | 0.347838132 | 0.121998979 | 2.851156091 | 0.004356058 | 0.022153808 |
| ENSMUSG00000019792 | 1093.275767 | 0.348231583 | 0.131097183 | 2.656285776 | 0.007900663 | 0.035976657 |
| ENSMUSG00000075700 | 5331.105597 | 0.348475762 | 0.130625009 | 2.66775684  | 0.00763595  | 0.035017339 |
| ENSMUSG00000094338 | 7386.394266 | 0.348538996 | 0.137858807 | 2.528231624 | 0.011463869 | 0.048271502 |
| ENSMUSG00000001542 | 1737.327298 | 0.348869162 | 0.17237916  | 2.023847674 | 0.042985827 | 0.135036897 |
| ENSMUSG00000029646 | 13342.12478 | 0.349052839 | 0.111052596 | 3.143130826 | 0.001671511 | 0.010158979 |
| ENSMUSG00000064367 | 125227.458  | 0.349588967 | 0.133434713 | 2.619925191 | 0.008794906 | 0.039231756 |
| ENSMUSG00000050552 | 1204.279174 | 0.349705364 | 0.127947497 | 2.733194257 | 0.006272333 | 0.029831369 |
| ENSMUSG00000030704 | 5320.780759 | 0.349706988 | 0.09955583  | 3.512672127 | 0.000443625 | 0.003346844 |
| ENSMUSG00000068798 | 1886.454383 | 0.350195514 | 0.102150313 | 3.42823732  | 0.000607514 | 0.004367561 |
| ENSMUSG00000056211 | 6380.919795 | 0.35082391  | 0.10830534  | 3.239211557 | 0.001198606 | 0.007706108 |
| ENSMUSG00000036863 | 7924.242786 | 0.350902841 | 0.108268483 | 3.241043306 | 0.001190931 | 0.007662709 |

|                    |             |             |             |             |             |             |
|--------------------|-------------|-------------|-------------|-------------|-------------|-------------|
| ENSMUSG00000061371 | 650.2240177 | 0.351268163 | 0.170714407 | 2.05763632  | 0.039625057 | 0.12720288  |
| ENSMUSG00000110289 | 460.9721007 | 0.351382147 | 0.168310347 | 2.087703775 | 0.036824564 | 0.120046205 |
| ENSMUSG00000030890 | 2653.020681 | 0.351660358 | 0.10270172  | 3.424094129 | 0.000616853 | 0.004426135 |
| ENSMUSG00000038831 | 1364.914736 | 0.351768464 | 0.149086065 | 2.359499279 | 0.018299616 | 0.069487442 |
| ENSMUSG00000004317 | 2241.782403 | 0.351972223 | 0.11798386  | 2.983223485 | 0.002852296 | 0.015787804 |
| ENSMUSG00000079057 | 2656.598629 | 0.352219914 | 0.153393435 | 2.296186371 | 0.021665227 | 0.079440355 |
| ENSMUSG00000032526 | 600.8668968 | 0.352428161 | 0.140072138 | 2.51604755  | 0.011867917 | 0.049536602 |
| ENSMUSG00000094724 | 2291.65779  | 0.352495602 | 0.118405183 | 2.977028482 | 0.00291057  | 0.016042663 |
| ENSMUSG00000051124 | 332.325964  | 0.352504989 | 0.161468187 | 2.183123464 | 0.029026719 | 0.099772636 |
| ENSMUSG00000107402 | 381.5736745 | 0.352552632 | 0.179402533 | 1.965148576 | 0.049397044 | 0.149829521 |
| ENSMUSG00000067629 | 1426.816427 | 0.352868603 | 0.157535537 | 2.239930178 | 0.025095456 | 0.089301702 |
| ENSMUSG00000048772 | 308.6959324 | 0.352870555 | 0.161594103 | 2.183684611 | 0.028985431 | 0.099676809 |
| ENSMUSG00000019303 | 517.906693  | 0.353061643 | 0.173712485 | 2.032448294 | 0.042108293 | 0.132992076 |
| ENSMUSG00000025353 | 2236.764484 | 0.353134471 | 0.119291407 | 2.960267462 | 0.003073721 | 0.016776075 |
| ENSMUSG00000063253 | 431.1788096 | 0.35341768  | 0.148705984 | 2.376620426 | 0.017472057 | 0.067022143 |
| ENSMUSG00000095687 | 2702.939545 | 0.353489099 | 0.118353429 | 2.986724593 | 0.002819836 | 0.015633868 |
| ENSMUSG00000024507 | 8411.28758  | 0.353557828 | 0.103779041 | 3.406832671 | 0.000657214 | 0.004672149 |
| ENSMUSG00000046096 | 460.4111578 | 0.354061689 | 0.16734997  | 2.115696159 | 0.034370658 | 0.113926878 |
| ENSMUSG00000074238 | 7909.844853 | 0.354105214 | 0.09699162  | 3.650884607 | 0.000261339 | 0.002109342 |
| ENSMUSG00000038668 | 1359.683574 | 0.354114064 | 0.135981182 | 2.604140218 | 0.009210507 | 0.040665338 |
| ENSMUSG00000018102 | 18169.61648 | 0.354190128 | 0.140114895 | 2.527854926 | 0.011476176 | 0.048289989 |
| ENSMUSG00000042473 | 1737.309381 | 0.354472745 | 0.126046797 | 2.812231274 | 0.004919911 | 0.024529163 |
| ENSMUSG00000024472 | 3817.173776 | 0.354792896 | 0.144872067 | 2.449008307 | 0.014325014 | 0.057519292 |
| ENSMUSG00000041161 | 1902.229256 | 0.355107413 | 0.119207517 | 2.978901178 | 0.002892841 | 0.015964672 |
| ENSMUSG00000031262 | 1229.063706 | 0.355228163 | 0.157698035 | 2.25258459  | 0.024285354 | 0.086916851 |
| ENSMUSG00000031799 | 5927.903614 | 0.355407257 | 0.111139566 | 3.197846363 | 0.00138458  | 0.008675899 |
| ENSMUSG00000068855 | 7702.15813  | 0.355614716 | 0.142406053 | 2.497188214 | 0.012518249 | 0.05155009  |
| ENSMUSG00000035441 | 21908.65375 | 0.355680654 | 0.109222344 | 3.256482535 | 0.001128019 | 0.007340515 |
| ENSMUSG00000004535 | 16852.77019 | 0.355695947 | 0.11843011  | 3.003424957 | 0.002669594 | 0.014969729 |

|                    |             |             |             |             |             |             |
|--------------------|-------------|-------------|-------------|-------------|-------------|-------------|
| ENSMUSG00000025268 | 724.5123995 | 0.355949962 | 0.163030082 | 2.183339156 | 0.029010843 | 0.099733438 |
| ENSMUSG00000039530 | 1172.201954 | 0.356167935 | 0.125388774 | 2.840508957 | 0.004504161 | 0.022751368 |
| ENSMUSG00000087368 | 414.7201422 | 0.356174064 | 0.157835424 | 2.256616768 | 0.024032032 | 0.08630247  |
| ENSMUSG00000035958 | 3399.136651 | 0.356424253 | 0.104371409 | 3.414960632 | 0.000637912 | 0.00455089  |
| ENSMUSG00000023186 | 1919.351872 | 0.356629197 | 0.129508636 | 2.753709782 | 0.005892399 | 0.028296931 |
| ENSMUSG00000086370 | 849.3698341 | 0.356986718 | 0.133895461 | 2.666159972 | 0.007672318 | 0.035155199 |
| ENSMUSG00000030654 | 7467.043925 | 0.357064176 | 0.100529847 | 3.551822543 | 0.000382573 | 0.002946048 |
| ENSMUSG00000039911 | 965.0839381 | 0.357437016 | 0.154883514 | 2.307779614 | 0.021011397 | 0.077488866 |
| ENSMUSG00000025544 | 11134.78446 | 0.357727578 | 0.103090007 | 3.470050961 | 0.00052036  | 0.003833677 |
| ENSMUSG00000034607 | 1613.369585 | 0.357772799 | 0.128684217 | 2.780238387 | 0.005431901 | 0.026541809 |
| ENSMUSG00000020607 | 5278.993989 | 0.357994054 | 0.154540924 | 2.31650002  | 0.020530983 | 0.076069357 |
| ENSMUSG00000024462 | 1153.601    | 0.358018496 | 0.159698792 | 2.241835965 | 0.024971976 | 0.088960864 |
| ENSMUSG00000040525 | 3042.073433 | 0.358287575 | 0.134280245 | 2.668207625 | 0.007625712 | 0.034991975 |
| ENSMUSG00000106680 | 503.4324213 | 0.358440855 | 0.175008755 | 2.04813099  | 0.040547166 | 0.129380792 |
| ENSMUSG00000087881 | 1246.496231 | 0.358647074 | 0.174368879 | 2.056829613 | 0.039702618 | 0.12737852  |
| ENSMUSG00000044477 | 2574.823031 | 0.358793451 | 0.123099345 | 2.914665807 | 0.003560696 | 0.018816305 |
| ENSMUSG00000097571 | 538.4859412 | 0.358829852 | 0.158054951 | 2.270285429 | 0.023190271 | 0.083821016 |
| ENSMUSG00000021701 | 6648.325832 | 0.359550319 | 0.135229869 | 2.658808456 | 0.007841753 | 0.035762564 |
| ENSMUSG00000046806 | 383.3037316 | 0.360027448 | 0.180208253 | 1.997841066 | 0.045733894 | 0.141651147 |
| ENSMUSG00000058444 | 2592.671254 | 0.360034594 | 0.101788648 | 3.537080037 | 0.000404577 | 0.003092006 |
| ENSMUSG00000022973 | 3330.24506  | 0.360277214 | 0.110101044 | 3.272241573 | 0.001066984 | 0.007025333 |
| ENSMUSG00000029066 | 2030.969909 | 0.360858844 | 0.133623196 | 2.700570376 | 0.006922069 | 0.032328946 |
| ENSMUSG00000040459 | 6047.191594 | 0.361173749 | 0.115053335 | 3.139185388 | 0.001694182 | 0.01027548  |
| ENSMUSG00000080717 | 634.9795303 | 0.36118903  | 0.133635064 | 2.702801333 | 0.006875783 | 0.032161584 |
| ENSMUSG00000051147 | 393.1912275 | 0.361668206 | 0.165906883 | 2.17994696  | 0.029261393 | 0.100457017 |
| ENSMUSG00000026321 | 6098.923874 | 0.361893347 | 0.117207382 | 3.087632711 | 0.002017577 | 0.01186863  |
| ENSMUSG00000041238 | 2875.697782 | 0.362086157 | 0.117367436 | 3.085064913 | 0.002035077 | 0.011940084 |
| ENSMUSG00000021188 | 8573.230257 | 0.362342517 | 0.111109705 | 3.261123925 | 0.001109715 | 0.00725528  |
| ENSMUSG00000032290 | 1935.419093 | 0.362709725 | 0.108961779 | 3.328779397 | 0.000872275 | 0.00594517  |

|                    |             |             |             |             |             |             |
|--------------------|-------------|-------------|-------------|-------------|-------------|-------------|
| ENSMUSG00000004633 | 3029.089015 | 0.36278994  | 0.111751624 | 3.246395236 | 0.001168765 | 0.007550585 |
| ENSMUSG00000027342 | 17564.59305 | 0.362802341 | 0.097837695 | 3.708206141 | 0.000208733 | 0.00174118  |
| ENSMUSG00000025816 | 1473.376517 | 0.362880366 | 0.139726361 | 2.597078766 | 0.009402036 | 0.041325549 |
| ENSMUSG00000028293 | 1688.388176 | 0.362935251 | 0.111511404 | 3.254691781 | 0.001135155 | 0.007380492 |
| ENSMUSG00000064289 | 2514.291986 | 0.363232907 | 0.111532503 | 3.256744877 | 0.001126977 | 0.007335875 |
| ENSMUSG00000024773 | 7243.851504 | 0.363391671 | 0.127159969 | 2.857752127 | 0.004266535 | 0.021782968 |
| ENSMUSG00000016503 | 3079.252178 | 0.363444416 | 0.107795303 | 3.371616447 | 0.000747284 | 0.005198125 |
| ENSMUSG00000004771 | 1881.994557 | 0.363503419 | 0.11151544  | 3.259668974 | 0.001115423 | 0.0072835   |
| ENSMUSG00000064351 | 965232.7235 | 0.363736068 | 0.110457721 | 3.292989072 | 0.000991283 | 0.006597565 |
| ENSMUSG00000038803 | 3225.486144 | 0.363756067 | 0.110684608 | 3.286419607 | 0.001014697 | 0.006726744 |
| ENSMUSG00000037096 | 290.6527607 | 0.363771871 | 0.172790863 | 2.10527261  | 0.035267585 | 0.116081593 |
| ENSMUSG00000019826 | 1052.128968 | 0.363889206 | 0.118846904 | 3.061831612 | 0.002199872 | 0.012739376 |
| ENSMUSG00000028760 | 7963.816698 | 0.363928692 | 0.131963858 | 2.757790639 | 0.005819346 | 0.028059941 |
| ENSMUSG00000022335 | 891.5355017 | 0.364034055 | 0.118937931 | 3.060706122 | 0.002208157 | 0.012780719 |
| ENSMUSG00000075701 | 1997.142952 | 0.364102164 | 0.131907512 | 2.760283763 | 0.005775118 | 0.02787893  |
| ENSMUSG00000035953 | 2019.048844 | 0.364416368 | 0.103268939 | 3.52880905  | 0.000417434 | 0.003180743 |
| ENSMUSG00000020311 | 2149.848403 | 0.36476898  | 0.114339082 | 3.190238845 | 0.001421553 | 0.008875668 |
| ENSMUSG00000028165 | 3093.095912 | 0.364850018 | 0.099277255 | 3.675061517 | 0.000237792 | 0.00194677  |
| ENSMUSG00000022139 | 9431.29997  | 0.365178384 | 0.103430747 | 3.53065597  | 0.000414531 | 0.003162657 |
| ENSMUSG00000060152 | 1912.513642 | 0.365527869 | 0.111918    | 3.266032884 | 0.001090656 | 0.00715374  |
| ENSMUSG00000023150 | 70322.81981 | 0.365553454 | 0.104466243 | 3.499249549 | 0.00046657  | 0.003496294 |
| ENSMUSG00000059182 | 2661.593018 | 0.366189287 | 0.166631798 | 2.197595488 | 0.027977945 | 0.097050265 |
| ENSMUSG00000020707 | 653.6108097 | 0.366320705 | 0.149953337 | 2.442897986 | 0.014569855 | 0.05830305  |
| ENSMUSG00000062785 | 488.9857236 | 0.366611294 | 0.145103876 | 2.526543763 | 0.011519104 | 0.048405414 |
| ENSMUSG00000031021 | 877.5901544 | 0.366644049 | 0.122592157 | 2.990762686 | 0.002782817 | 0.01547235  |
| ENSMUSG00000024878 | 775.7937084 | 0.366727752 | 0.143749404 | 2.55116015  | 0.010736498 | 0.045877493 |
| ENSMUSG00000084910 | 293.5235224 | 0.366760428 | 0.177234189 | 2.069354845 | 0.038512801 | 0.124420392 |
| ENSMUSG00000029725 | 921.4023925 | 0.366801227 | 0.126030198 | 2.910423316 | 0.003609395 | 0.019005422 |
| ENSMUSG00000022749 | 1777.713434 | 0.366823742 | 0.108089839 | 3.393693118 | 0.000689569 | 0.004858636 |



|                    |             |             |             |             |             |             |
|--------------------|-------------|-------------|-------------|-------------|-------------|-------------|
| ENSMUSG00000036934 | 633.9828637 | 0.366906243 | 0.143216535 | 2.561898617 | 0.01041017  | 0.044749182 |
| ENSMUSG00000024346 | 2191.597582 | 0.367101734 | 0.115227046 | 3.185899018 | 0.00144305  | 0.008979199 |
| ENSMUSG00000037152 | 2388.035048 | 0.367113193 | 0.109375137 | 3.356459281 | 0.000789473 | 0.005432289 |
| ENSMUSG00000052419 | 634.1780232 | 0.367140062 | 0.13602185  | 2.699125627 | 0.006952193 | 0.032435324 |
| ENSMUSG00000032440 | 3070.66493  | 0.367307319 | 0.1063361   | 3.454210931 | 0.000551906 | 0.004022237 |
| ENSMUSG00000020993 | 1284.773997 | 0.367451967 | 0.116228394 | 3.161464708 | 0.001569778 | 0.009641319 |
| ENSMUSG00000079179 | 1222.521196 | 0.367493357 | 0.120377164 | 3.052849433 | 0.002266796 | 0.013055741 |
| ENSMUSG00000017677 | 5167.823135 | 0.368500564 | 0.137725761 | 2.675611025 | 0.007459316 | 0.03437267  |
| ENSMUSG00000021367 | 3229.587077 | 0.369241552 | 0.178005919 | 2.07432177  | 0.038049437 | 0.12319113  |
| ENSMUSG00000037434 | 1393.755704 | 0.369582534 | 0.134719054 | 2.743357548 | 0.006081443 | 0.029028736 |
| ENSMUSG00000031163 | 1084.457708 | 0.369694673 | 0.147166978 | 2.512076267 | 0.012002315 | 0.049965208 |
| ENSMUSG00000037455 | 2416.284518 | 0.369855698 | 0.142755517 | 2.590832955 | 0.009574395 | 0.041915703 |
| ENSMUSG00000032652 | 450.4461043 | 0.370087715 | 0.17858741  | 2.072305738 | 0.038236938 | 0.123690448 |
| ENSMUSG00000040498 | 3186.71837  | 0.37067804  | 0.12847207  | 2.885281133 | 0.003910643 | 0.020267544 |
| ENSMUSG00000035242 | 13179.74623 | 0.3711918   | 0.098511107 | 3.768019772 | 0.000164548 | 0.001409749 |
| ENSMUSG00000073468 | 999.9044892 | 0.371364718 | 0.125616775 | 2.956330623 | 0.003113232 | 0.016921321 |
| ENSMUSG00000074922 | 1314.713432 | 0.371706492 | 0.124438341 | 2.987073658 | 0.002816619 | 0.01562134  |
| ENSMUSG00000015575 | 1520.056401 | 0.372371742 | 0.108504603 | 3.431852018 | 0.000599475 | 0.004321137 |
| ENSMUSG00000031520 | 299.3388181 | 0.372638602 | 0.169378037 | 2.200040859 | 0.027803996 | 0.096567033 |
| ENSMUSG00000061689 | 3994.864086 | 0.373048579 | 0.138226087 | 2.698829057 | 0.006958391 | 0.032457451 |
| ENSMUSG00000049439 | 965.1017488 | 0.373137532 | 0.117520809 | 3.17507627  | 0.001497971 | 0.009261507 |
| ENSMUSG00000002957 | 6648.28284  | 0.373187011 | 0.118203356 | 3.157160876 | 0.001593134 | 0.009768624 |
| ENSMUSG00000053182 | 1755.021258 | 0.373228222 | 0.175239318 | 2.129820098 | 0.033186469 | 0.110941604 |
| ENSMUSG00000020530 | 6568.437573 | 0.373390686 | 0.099760478 | 3.742871864 | 0.000181929 | 0.001540903 |
| ENSMUSG00000032525 | 11870.0324  | 0.373456406 | 0.121721154 | 3.068130671 | 0.002154024 | 0.012512865 |
| ENSMUSG00000031266 | 883.2489265 | 0.373941535 | 0.116633859 | 3.20611473  | 0.001345403 | 0.008475661 |
| ENSMUSG00000062376 | 533.9228371 | 0.374053285 | 0.160231249 | 2.334459029 | 0.019571699 | 0.073147052 |
| ENSMUSG00000064370 | 350336.1275 | 0.374127491 | 0.149335826 | 2.505276193 | 0.012235581 | 0.050690263 |
| ENSMUSG00000069300 | 11702.69769 | 0.374152741 | 0.144819568 | 2.583578629 | 0.009778118 | 0.042631828 |

|                    |             |             |             |             |             |             |
|--------------------|-------------|-------------|-------------|-------------|-------------|-------------|
| ENSMUSG00000024121 | 1046.370701 | 0.3744884   | 0.169527685 | 2.209010283 | 0.027173926 | 0.095000112 |
| ENSMUSG00000030741 | 2921.046784 | 0.374643067 | 0.102062495 | 3.670722218 | 0.000241866 | 0.001975048 |
| ENSMUSG00000059866 | 1151.514308 | 0.374648268 | 0.165435856 | 2.264613469 | 0.02353641  | 0.084864264 |
| ENSMUSG00000038507 | 1469.743312 | 0.37477303  | 0.124310944 | 3.014803186 | 0.002571461 | 0.014510664 |
| ENSMUSG00000097217 | 222.010786  | 0.374899211 | 0.190028587 | 1.972856916 | 0.048511866 | 0.14793698  |
| ENSMUSG00000002580 | 1387.449887 | 0.374978844 | 0.113763333 | 3.29613096  | 0.000980263 | 0.006537335 |
| ENSMUSG00000026946 | 1298.301654 | 0.375223945 | 0.162289234 | 2.312069231 | 0.020773868 | 0.076816123 |
| ENSMUSG00000025762 | 4293.243152 | 0.37542838  | 0.097975831 | 3.831846846 | 0.000127185 | 0.001130921 |
| ENSMUSG00000024896 | 3018.579711 | 0.375747116 | 0.121015528 | 3.104949602 | 0.001903114 | 0.011305636 |
| ENSMUSG00000053799 | 2747.761121 | 0.375789247 | 0.108374701 | 3.467499725 | 0.000525324 | 0.003863871 |
| ENSMUSG00000054474 | 810.5467847 | 0.375847141 | 0.157215138 | 2.390654902 | 0.016818353 | 0.065002788 |
| ENSMUSG00000027195 | 5840.965512 | 0.375911154 | 0.095785218 | 3.924521587 | 8.69E-05    | 0.000812432 |
| ENSMUSG00000027882 | 2293.494624 | 0.375969667 | 0.102464171 | 3.669279337 | 0.000243235 | 0.001985501 |
| ENSMUSG00000114709 | 356.529205  | 0.376353749 | 0.183553383 | 2.05037762  | 0.040327595 | 0.128864552 |
| ENSMUSG00000069310 | 15681.27854 | 0.376728484 | 0.114873083 | 3.279519229 | 0.001039841 | 0.006875037 |
| ENSMUSG00000020546 | 610.573208  | 0.377309773 | 0.178662368 | 2.111859244 | 0.034698524 | 0.114689756 |
| ENSMUSG00000075376 | 5621.064813 | 0.377392388 | 0.11434184  | 3.300562486 | 0.000964912 | 0.006446896 |
| ENSMUSG00000023961 | 370.4556968 | 0.377394822 | 0.176878952 | 2.133633307 | 0.032872809 | 0.110256658 |
| ENSMUSG00000024726 | 1544.839807 | 0.377460525 | 0.10842574  | 3.48128152  | 0.000499021 | 0.003704614 |
| ENSMUSG00000035248 | 10122.2132  | 0.377460969 | 0.113489001 | 3.325969614 | 0.000881115 | 0.005994434 |
| ENSMUSG00000020231 | 2028.994978 | 0.377532858 | 0.112044422 | 3.369492674 | 0.000753067 | 0.005227316 |
| ENSMUSG00000025950 | 3983.406947 | 0.377598271 | 0.112586184 | 3.353859739 | 0.000796927 | 0.00547682  |
| ENSMUSG00000028149 | 3153.331652 | 0.377720983 | 0.112201541 | 3.366450932 | 0.000761421 | 0.005273433 |
| ENSMUSG00000021552 | 1255.337678 | 0.378174968 | 0.118511642 | 3.191036442 | 0.001417634 | 0.00886061  |
| ENSMUSG00000039704 | 3399.579904 | 0.378195107 | 0.115289857 | 3.280384906 | 0.001036656 | 0.006856007 |
| ENSMUSG00000029290 | 2850.112833 | 0.378317654 | 0.107651094 | 3.514294555 | 0.000440924 | 0.003334363 |
| ENSMUSG00000027956 | 559.9866387 | 0.378653036 | 0.132443898 | 2.858969283 | 0.004250199 | 0.021719454 |
| ENSMUSG00000032340 | 11018.44296 | 0.378703666 | 0.135979561 | 2.785004331 | 0.005352701 | 0.02624683  |
| ENSMUSG00000024948 | 1588.776911 | 0.378771638 | 0.131542501 | 2.879462037 | 0.003983543 | 0.020578407 |

|                      |             |             |             |             |             |             |
|----------------------|-------------|-------------|-------------|-------------|-------------|-------------|
| ENSMUSG00000003865   | 1417.386224 | 0.378905546 | 0.107408788 | 3.52769595  | 0.000419193 | 0.00319149  |
| ENSMUSG000000036661  | 1672.06932  | 0.378946598 | 0.141358121 | 2.680755774 | 0.00734561  | 0.033944148 |
| ENSMUSG000000036246  | 984.7174556 | 0.379055895 | 0.13827646  | 2.741290133 | 0.006119844 | 0.029180809 |
| ENSMUSG000000019873  | 4282.589912 | 0.379064703 | 0.121252426 | 3.126244273 | 0.001770544 | 0.010645701 |
| ENSMUSG000000032673  | 269.7306445 | 0.379306663 | 0.162120995 | 2.33965171  | 0.019301731 | 0.072453778 |
| ENSMUSG000000028483  | 1910.573697 | 0.379355674 | 0.109558209 | 3.462594692 | 0.000534994 | 0.003923345 |
| ENSMUSG000000078201  | 356.0425436 | 0.379534485 | 0.146983338 | 2.582159931 | 0.009818407 | 0.042732299 |
| ENSMUSG000000020420  | 1021.777007 | 0.379559384 | 0.123021438 | 3.085310903 | 0.002033395 | 0.011933352 |
| ENSMUSG000000014164  | 350.9427909 | 0.379827815 | 0.15750161  | 2.411580528 | 0.015883544 | 0.062252884 |
| ENSMUSG000000021715  | 1664.904116 | 0.379974573 | 0.11258682  | 3.374947198 | 0.000738299 | 0.005142035 |
| ENSMUSG000000024085  | 12859.34595 | 0.379982444 | 0.120709568 | 3.147906582 | 0.001644442 | 0.010022804 |
| ENSMUSG000000039191  | 1827.765863 | 0.380437755 | 0.112142615 | 3.392445899 | 0.000692716 | 0.004877885 |
| ENSMUSG000000026437  | 3614.283383 | 0.380451539 | 0.104705226 | 3.633548696 | 0.00027955  | 0.002240114 |
| ENSMUSG000000029804  | 3260.352391 | 0.380669121 | 0.115768257 | 3.28819946  | 0.001008304 | 0.006688335 |
| ENSMUSG000000019907  | 9939.654571 | 0.380798665 | 0.106089895 | 3.589396199 | 0.000331445 | 0.002604493 |
| ENSMUSG000000099517  | 7586.037331 | 0.381158594 | 0.120925991 | 3.151998936 | 0.001621569 | 0.009912994 |
| ENSMUSG000000034327  | 1076.405264 | 0.381174616 | 0.116323879 | 3.276838952 | 0.001049762 | 0.006930358 |
| ENSMUSG000000024014  | 2354.606469 | 0.381189082 | 0.172860487 | 2.205183429 | 0.027441225 | 0.09560487  |
| ENSMUSG0000000103651 | 489.5899644 | 0.381271416 | 0.185313614 | 2.057438778 | 0.039644038 | 0.127245495 |
| ENSMUSG000000004032  | 2231.700854 | 0.381370101 | 0.1123604   | 3.394168231 | 0.000688374 | 0.004851905 |
| ENSMUSG000000050240  | 800.1427394 | 0.382376174 | 0.145966806 | 2.619610484 | 0.008803025 | 0.039239709 |
| ENSMUSG000000031996  | 15532.89044 | 0.382850006 | 0.129285841 | 2.961267856 | 0.003063754 | 0.016737905 |
| ENSMUSG000000075031  | 10641.75108 | 0.382978642 | 0.123672755 | 3.096709877 | 0.001956813 | 0.011578372 |
| ENSMUSG000000043923  | 1435.76851  | 0.383214212 | 0.113648141 | 3.3719356   | 0.000746419 | 0.005193725 |
| ENSMUSG000000004056  | 4105.337778 | 0.383430705 | 0.151104049 | 2.537527671 | 0.011163854 | 0.047268865 |
| ENSMUSG000000035093  | 3048.999453 | 0.384013852 | 0.117766237 | 3.260814493 | 0.001110927 | 0.007261073 |
| ENSMUSG000000039016  | 1965.039379 | 0.384409194 | 0.123726143 | 3.106935883 | 0.001890374 | 0.011244926 |
| ENSMUSG000000019998  | 2828.717536 | 0.384625164 | 0.099046586 | 3.88327532  | 0.000103059 | 0.00094116  |
| ENSMUSG000000060708  | 696.5359772 | 0.384700921 | 0.126937306 | 3.030637197 | 0.002440383 | 0.013858665 |

|                    |             |             |             |             |             |             |
|--------------------|-------------|-------------|-------------|-------------|-------------|-------------|
| ENSMUSG00000037416 | 10745.52248 | 0.384717464 | 0.114567059 | 3.358011165 | 0.000785054 | 0.005406887 |
| ENSMUSG00000027695 | 6871.713442 | 0.384751999 | 0.138288408 | 2.782243314 | 0.005398455 | 0.026424703 |
| ENSMUSG00000038206 | 1144.75204  | 0.384995652 | 0.130406821 | 2.952266229 | 0.003154508 | 0.017108144 |
| ENSMUSG00000021241 | 968.486653  | 0.385088455 | 0.123193139 | 3.125892064 | 0.001772666 | 0.010650163 |
| ENSMUSG00000034329 | 2034.801189 | 0.3851741   | 0.131671905 | 2.925256531 | 0.003441724 | 0.018322722 |
| ENSMUSG00000044501 | 503.1377982 | 0.385370437 | 0.147506814 | 2.612560242 | 0.008986685 | 0.039851276 |
| ENSMUSG00000109644 | 796.4782632 | 0.385421776 | 0.176862765 | 2.17921379  | 0.02931579  | 0.100611178 |
| ENSMUSG00000062198 | 561.2356818 | 0.385659899 | 0.172884105 | 2.230742366 | 0.0256982   | 0.09092425  |
| ENSMUSG00000042410 | 3720.463349 | 0.386033373 | 0.099165661 | 3.892812988 | 9.91E-05    | 0.000909746 |
| ENSMUSG00000054942 | 2458.465418 | 0.386037384 | 0.124790064 | 3.093494568 | 0.001978142 | 0.011685971 |
| ENSMUSG00000079316 | 1095.346935 | 0.386622046 | 0.129149345 | 2.99360438  | 0.002757032 | 0.015357751 |
| ENSMUSG00000045316 | 1918.843082 | 0.386871341 | 0.130633801 | 2.961494933 | 0.003061495 | 0.016731093 |
| ENSMUSG00000024943 | 5471.708993 | 0.387179885 | 0.122793637 | 3.153094032 | 0.001615498 | 0.009886721 |
| ENSMUSG00000019877 | 2230.792385 | 0.387236965 | 0.105850598 | 3.658335167 | 0.000253859 | 0.002055648 |
| ENSMUSG00000063524 | 14569.57027 | 0.387329147 | 0.104253477 | 3.715263588 | 0.000202992 | 0.001698658 |
| ENSMUSG00000100707 | 324.3068256 | 0.387356271 | 0.177132146 | 2.186820863 | 0.028755604 | 0.099097802 |
| ENSMUSG00000036977 | 588.4930464 | 0.387462852 | 0.134074041 | 2.889917004 | 0.003853435 | 0.020022242 |
| ENSMUSG00000041237 | 4536.353949 | 0.387576445 | 0.120718493 | 3.210580538 | 0.001324671 | 0.008366326 |
| ENSMUSG00000110558 | 540.9172654 | 0.387625457 | 0.163355407 | 2.372896394 | 0.017649214 | 0.067523609 |
| ENSMUSG00000022793 | 907.5297669 | 0.387774901 | 0.132871066 | 2.91842997  | 0.003517989 | 0.018644171 |
| ENSMUSG00000020948 | 608.1812182 | 0.387895099 | 0.143068953 | 2.711245805 | 0.006703091 | 0.031497186 |
| ENSMUSG00000032413 | 3016.189873 | 0.387938364 | 0.119747041 | 3.239648849 | 0.00119677  | 0.007698057 |
| ENSMUSG00000032311 | 373.5857707 | 0.388756664 | 0.177340053 | 2.192153765 | 0.028368406 | 0.098175639 |
| ENSMUSG00000033792 | 1950.039034 | 0.388766134 | 0.112264524 | 3.462947319 | 0.000534293 | 0.003919496 |
| ENSMUSG00000062727 | 10233.34597 | 0.388791693 | 0.130747137 | 2.973615338 | 0.002943138 | 0.016178189 |
| ENSMUSG00000021597 | 1791.735342 | 0.388844851 | 0.126543568 | 3.072814032 | 0.002120506 | 0.012353553 |
| ENSMUSG00000062646 | 750.5068479 | 0.388852759 | 0.175239908 | 2.218973767 | 0.026488509 | 0.093188239 |
| ENSMUSG00000006699 | 8219.110213 | 0.388938395 | 0.125904277 | 3.089159502 | 0.002007236 | 0.01182652  |
| ENSMUSG00000007987 | 659.4330309 | 0.38898622  | 0.154064927 | 2.524820075 | 0.011575754 | 0.048570251 |

|                    |             |             |             |             |             |             |
|--------------------|-------------|-------------|-------------|-------------|-------------|-------------|
| ENSMUSG00000045180 | 4442.495617 | 0.390080946 | 0.10891948  | 3.581369897 | 0.000341797 | 0.002667981 |
| ENSMUSG00000069265 | 13183.88057 | 0.390214342 | 0.126730666 | 3.079083817 | 0.002076383 | 0.012144088 |
| ENSMUSG00000024587 | 11849.11869 | 0.39024376  | 0.100736327 | 3.873912931 | 0.000107102 | 0.00097449  |
| ENSMUSG00000038658 | 4264.012867 | 0.390273868 | 0.101320569 | 3.851872056 | 0.000117218 | 0.001050677 |
| ENSMUSG00000014418 | 3917.82723  | 0.390300009 | 0.124560419 | 3.133419216 | 0.001727825 | 0.010440892 |
| ENSMUSG00000057069 | 937.5544018 | 0.390658375 | 0.157324822 | 2.483132481 | 0.013023264 | 0.053268693 |
| ENSMUSG00000017978 | 4984.226348 | 0.390959693 | 0.109926448 | 3.556557129 | 0.000375747 | 0.002902504 |
| ENSMUSG00000030946 | 3672.261215 | 0.391187611 | 0.146661619 | 2.667280061 | 0.007646792 | 0.035055255 |
| ENSMUSG00000035673 | 7400.57391  | 0.39149796  | 0.15604826  | 2.508826176 | 0.012113308 | 0.05033331  |
| ENSMUSG00000038871 | 2004.596102 | 0.391576977 | 0.131669655 | 2.973934874 | 0.002940075 | 0.016165337 |
| ENSMUSG00000026096 | 575.9236743 | 0.391743425 | 0.160636726 | 2.438691539 | 0.014740545 | 0.05879608  |
| ENSMUSG00000025742 | 5778.188421 | 0.391883165 | 0.109190314 | 3.588992018 | 0.000331959 | 0.002606696 |
| ENSMUSG00000029378 | 2745.858124 | 0.392045908 | 0.154456901 | 2.538222019 | 0.011141728 | 0.047202065 |
| ENSMUSG00000052407 | 1067.863968 | 0.392056787 | 0.160535294 | 2.442184379 | 0.014598689 | 0.058374481 |
| ENSMUSG00000033186 | 1311.639316 | 0.392696726 | 0.140643659 | 2.79213957  | 0.005236077 | 0.025782677 |
| ENSMUSG00000006736 | 3061.403678 | 0.392795119 | 0.11271991  | 3.484700428 | 0.000492688 | 0.003662481 |
| ENSMUSG00000026761 | 1658.534193 | 0.393072134 | 0.134781999 | 2.916354836 | 0.003541475 | 0.018741915 |
| ENSMUSG00000038331 | 963.9610288 | 0.393148158 | 0.11995821  | 3.277375982 | 0.001047767 | 0.006919237 |
| ENSMUSG00000020390 | 3094.714981 | 0.394343709 | 0.101195614 | 3.896845874 | 9.75E-05    | 0.000897279 |
| ENSMUSG00000029561 | 1435.832272 | 0.39484534  | 0.161901091 | 2.438805924 | 0.01473588  | 0.05879608  |
| ENSMUSG00000051319 | 568.4903789 | 0.39522902  | 0.153578424 | 2.573467096 | 0.010068522 | 0.043582708 |
| ENSMUSG00000033105 | 2811.157268 | 0.395231615 | 0.120664363 | 3.275462665 | 0.001054891 | 0.006955977 |
| ENSMUSG00000035877 | 4463.022688 | 0.395250141 | 0.141102628 | 2.801153638 | 0.005092027 | 0.025212543 |
| ENSMUSG00000033157 | 1116.605232 | 0.395481387 | 0.122466127 | 3.229312446 | 0.001240882 | 0.007920126 |
| ENSMUSG00000028064 | 5818.851087 | 0.395537517 | 0.116299193 | 3.401034071 | 0.000671315 | 0.004746667 |
| ENSMUSG00000056268 | 2511.201595 | 0.395738566 | 0.115427704 | 3.42845394  | 0.00060703  | 0.004365484 |
| ENSMUSG00000036181 | 33349.93221 | 0.395939263 | 0.132079084 | 2.997743853 | 0.002719862 | 0.015196635 |
| ENSMUSG00000030619 | 4006.548608 | 0.396202218 | 0.100276065 | 3.951114538 | 7.78E-05    | 0.000738877 |
| ENSMUSG00000061751 | 826.9425974 | 0.396342702 | 0.158221281 | 2.504989846 | 0.012245491 | 0.050712478 |

|                    |             |             |             |             |             |             |
|--------------------|-------------|-------------|-------------|-------------|-------------|-------------|
| ENSMUSG00000020629 | 3508.734939 | 0.396621158 | 0.119202601 | 3.327286089 | 0.000876963 | 0.005971649 |
| ENSMUSG00000035505 | 1057.002587 | 0.396892977 | 0.186098886 | 2.13269937  | 0.032949396 | 0.11034757  |
| ENSMUSG00000075266 | 515.7822232 | 0.396902792 | 0.164220274 | 2.416892771 | 0.015653628 | 0.061535616 |
| ENSMUSG00000021432 | 2916.052348 | 0.397238223 | 0.112613876 | 3.527435849 | 0.000419605 | 0.003192283 |
| ENSMUSG00000026411 | 1069.501766 | 0.39747828  | 0.135441081 | 2.934695126 | 0.003338756 | 0.017894157 |
| ENSMUSG00000019861 | 2060.912582 | 0.397734865 | 0.104017419 | 3.823733283 | 0.000131446 | 0.001161863 |
| ENSMUSG00000034394 | 290.3104611 | 0.397843173 | 0.180475737 | 2.204413624 | 0.027495268 | 0.095748279 |
| ENSMUSG00000025939 | 691.7722747 | 0.398084129 | 0.126137421 | 3.155955826 | 0.001599731 | 0.009803682 |
| ENSMUSG00000071454 | 1727.604266 | 0.398111482 | 0.107361111 | 3.708153534 | 0.000208776 | 0.00174118  |
| ENSMUSG00000025921 | 2270.103249 | 0.398598646 | 0.123305016 | 3.232623136 | 0.001226593 | 0.007849137 |
| ENSMUSG00000017831 | 3151.636824 | 0.398700634 | 0.105004887 | 3.796972186 | 0.000146474 | 0.001273498 |
| ENSMUSG00000057835 | 388.7937228 | 0.398838378 | 0.153869596 | 2.592054493 | 0.009540466 | 0.0418082   |
| ENSMUSG00000028245 | 3098.780556 | 0.398936919 | 0.099679251 | 4.00220624  | 6.28E-05    | 0.000612736 |
| ENSMUSG00000026126 | 4420.195275 | 0.399103761 | 0.109720556 | 3.637456596 | 0.000275344 | 0.002211973 |
| ENSMUSG00000029260 | 10203.92127 | 0.399387652 | 0.203520311 | 1.962397021 | 0.049716279 | 0.15049854  |
| ENSMUSG00000026425 | 3204.561249 | 0.399644861 | 0.104861041 | 3.81118531  | 0.000138302 | 0.001215238 |
| ENSMUSG00000034653 | 1616.396902 | 0.399688989 | 0.16482927  | 2.42486659  | 0.015314013 | 0.060542069 |
| ENSMUSG00000069274 | 18914.69146 | 0.399736511 | 0.108399454 | 3.687624761 | 0.000226357 | 0.00186686  |
| ENSMUSG00000110834 | 191.2955053 | 0.400326035 | 0.197618194 | 2.025754952 | 0.042789902 | 0.134611033 |
| ENSMUSG00000050957 | 377.3535845 | 0.400885313 | 0.186331961 | 2.151457596 | 0.031440099 | 0.106185924 |
| ENSMUSG00000026670 | 4720.15397  | 0.401318208 | 0.098760449 | 4.063551872 | 4.83E-05    | 0.000488033 |
| ENSMUSG00000020716 | 11053.06806 | 0.401894577 | 0.124130242 | 3.237684627 | 0.001205039 | 0.007737859 |
| ENSMUSG00000045991 | 13862.4486  | 0.402536132 | 0.106567749 | 3.777279108 | 0.000158551 | 0.001364138 |
| ENSMUSG00000041119 | 3774.847372 | 0.402907565 | 0.147959958 | 2.723085154 | 0.006467539 | 0.030583668 |
| ENSMUSG00000086429 | 613.1486998 | 0.402995508 | 0.158385887 | 2.544390259 | 0.01094687  | 0.046588961 |
| ENSMUSG00000103674 | 327.3380515 | 0.40311289  | 0.187154421 | 2.15390525  | 0.031247603 | 0.10567983  |
| ENSMUSG00000046675 | 716.5806034 | 0.403778598 | 0.137033517 | 2.946568164 | 0.003213216 | 0.017356735 |
| ENSMUSG00000021215 | 11597.00058 | 0.403892023 | 0.106135673 | 3.805431393 | 0.000141557 | 0.001239446 |
| ENSMUSG00000032410 | 4901.496513 | 0.403913114 | 0.11487487  | 3.516113792 | 0.000437913 | 0.003316096 |

|                    |             |             |             |             |             |             |
|--------------------|-------------|-------------|-------------|-------------|-------------|-------------|
| ENSMUSG00000024642 | 4776.552643 | 0.404227503 | 0.113776915 | 3.552807738 | 0.000381143 | 0.002938081 |
| ENSMUSG00000020364 | 258.6448271 | 0.404864793 | 0.171793167 | 2.356699051 | 0.018438183 | 0.069942153 |
| ENSMUSG00000075229 | 1715.777386 | 0.405065387 | 0.131141402 | 3.088768155 | 0.002009882 | 0.01183273  |
| ENSMUSG00000038344 | 2188.098563 | 0.405122586 | 0.135576203 | 2.988154089 | 0.00280668  | 0.015585601 |
| ENSMUSG00000016252 | 7577.535003 | 0.405770627 | 0.112406092 | 3.609863322 | 0.000306358 | 0.002431352 |
| ENSMUSG00000088246 | 984.6337083 | 0.405934711 | 0.141758562 | 2.863563965 | 0.004189042 | 0.021480761 |
| ENSMUSG00000014294 | 3106.592071 | 0.406016407 | 0.120593013 | 3.366831943 | 0.00076037  | 0.005269426 |
| ENSMUSG00000028496 | 2815.04903  | 0.406241534 | 0.102077471 | 3.97973743  | 6.90E-05    | 0.000666339 |
| ENSMUSG00000113902 | 1646.84939  | 0.40695065  | 0.140727778 | 2.89175781  | 0.003830931 | 0.01993783  |
| ENSMUSG00000086629 | 330.7407475 | 0.406967377 | 0.179248765 | 2.27040547  | 0.023182993 | 0.083821016 |
| ENSMUSG00000109206 | 199.2628347 | 0.406974529 | 0.198531622 | 2.049922953 | 0.04037195  | 0.128950853 |
| ENSMUSG00000049907 | 1326.821817 | 0.407095759 | 0.143188563 | 2.843074541 | 0.004468062 | 0.022599739 |
| ENSMUSG00000032491 | 341.4410761 | 0.40749128  | 0.17277775  | 2.358470809 | 0.018350403 | 0.069644713 |
| ENSMUSG00000027770 | 4017.994902 | 0.40767324  | 0.10458506  | 3.898006452 | 9.70E-05    | 0.000893771 |
| ENSMUSG00000026360 | 558.0980266 | 0.408089249 | 0.175212283 | 2.329113245 | 0.019853067 | 0.074049716 |
| ENSMUSG00000034342 | 7412.125993 | 0.408198697 | 0.142915449 | 2.856225129 | 0.00428711  | 0.021852994 |
| ENSMUSG00000030494 | 7785.495808 | 0.408229227 | 0.112481214 | 3.629310301 | 0.000284179 | 0.002274762 |
| ENSMUSG00000032599 | 2383.698364 | 0.408290992 | 0.130353496 | 3.132182907 | 0.001735117 | 0.010469387 |
| ENSMUSG00000043801 | 286.366437  | 0.408308488 | 0.202046382 | 2.020865133 | 0.043293728 | 0.135807131 |
| ENSMUSG00000112964 | 584.788405  | 0.408702185 | 0.165369096 | 2.471454426 | 0.01345647  | 0.054641796 |
| ENSMUSG00000031337 | 1038.262531 | 0.409179659 | 0.12442371  | 3.288598753 | 0.001006875 | 0.006680842 |
| ENSMUSG00000032328 | 3093.188555 | 0.409309847 | 0.098659301 | 4.148720338 | 3.34E-05    | 0.000349068 |
| ENSMUSG00000050856 | 2200.247787 | 0.409544791 | 0.120914076 | 3.38707291  | 0.000706426 | 0.004958769 |
| ENSMUSG00000106918 | 1448.033374 | 0.409558289 | 0.116832441 | 3.50551855  | 0.000455719 | 0.003426495 |
| ENSMUSG00000030275 | 4842.391162 | 0.409623779 | 0.107652055 | 3.805071602 | 0.000141763 | 0.001240275 |
| ENSMUSG00000027752 | 2610.188918 | 0.409780561 | 0.113745991 | 3.602593427 | 0.000315058 | 0.002490645 |
| ENSMUSG00000028691 | 20932.34693 | 0.409791067 | 0.120419749 | 3.403022112 | 0.000666449 | 0.004727251 |
| ENSMUSG00000026014 | 4407.133113 | 0.410503882 | 0.114616649 | 3.581537974 | 0.000341577 | 0.002667199 |
| ENSMUSG00000054364 | 7813.168853 | 0.410828544 | 0.134013222 | 3.065582168 | 0.002172467 | 0.012600307 |

|                    |             |             |             |             |             |             |
|--------------------|-------------|-------------|-------------|-------------|-------------|-------------|
| ENSMUSG00000040177 | 1068.302656 | 0.41099364  | 0.15653094  | 2.625638351 | 0.008648665 | 0.038667579 |
| ENSMUSG00000048249 | 1762.074674 | 0.411144056 | 0.188716421 | 2.178634232 | 0.029358851 | 0.10072796  |
| ENSMUSG00000020305 | 738.2823778 | 0.411414179 | 0.140165812 | 2.935196351 | 0.003333367 | 0.017873867 |
| ENSMUSG00000031861 | 287.0792467 | 0.411665173 | 0.200587719 | 2.052294998 | 0.040141002 | 0.128439464 |
| ENSMUSG00000104394 | 257.9837449 | 0.411786715 | 0.20603582  | 1.998617112 | 0.045649797 | 0.141452846 |
| ENSMUSG00000091625 | 713.6414589 | 0.412089917 | 0.167421161 | 2.461396848 | 0.013839719 | 0.055953512 |
| ENSMUSG00000049493 | 11077.11888 | 0.412258126 | 0.116062432 | 3.552037625 | 0.00038226  | 0.002944658 |
| ENSMUSG00000051166 | 227.3920602 | 0.412274152 | 0.179492719 | 2.296885103 | 0.021625325 | 0.079333175 |
| ENSMUSG00000023965 | 1789.100044 | 0.412464459 | 0.110604064 | 3.72919805  | 0.00019209  | 0.00161775  |
| ENSMUSG00000069302 | 6980.853679 | 0.412582009 | 0.139092462 | 2.966242762 | 0.003014624 | 0.01650684  |
| ENSMUSG00000028949 | 1527.569841 | 0.412708494 | 0.156947527 | 2.629595384 | 0.008548655 | 0.038358863 |
| ENSMUSG00000021196 | 3595.422608 | 0.412713102 | 0.140331097 | 2.940995349 | 0.003271594 | 0.017612227 |
| ENSMUSG00000053317 | 4076.337401 | 0.41273992  | 0.133685629 | 3.087391846 | 0.002019212 | 0.01187512  |
| ENSMUSG00000062031 | 1813.537701 | 0.412796676 | 0.128124313 | 3.221844984 | 0.00127368  | 0.008101638 |
| ENSMUSG00000024146 | 1450.540542 | 0.412856619 | 0.105949526 | 3.89672927  | 9.75E-05    | 0.000897279 |
| ENSMUSG00000112302 | 384.44612   | 0.412908133 | 0.148882231 | 2.773387596 | 0.0055476   | 0.027015798 |
| ENSMUSG00000022450 | 4584.649522 | 0.413578183 | 0.110565557 | 3.740569793 | 0.000183604 | 0.001552139 |
| ENSMUSG00000027677 | 4041.041165 | 0.414080388 | 0.128621738 | 3.219365507 | 0.001284746 | 0.008147239 |
| ENSMUSG00000098702 | 438.8023046 | 0.414214999 | 0.14040008  | 2.950247598 | 0.003175194 | 0.017191064 |
| ENSMUSG00000006538 | 1484.608956 | 0.41449684  | 0.204452414 | 2.027351167 | 0.042626512 | 0.134191678 |
| ENSMUSG00000051627 | 43433.85614 | 0.414704717 | 0.129215944 | 3.209392776 | 0.001330156 | 0.008386717 |
| ENSMUSG00000029446 | 620.6559119 | 0.41473461  | 0.143407194 | 2.892007014 | 0.003827894 | 0.019926672 |
| ENSMUSG00000091405 | 8465.552765 | 0.41479646  | 0.135248865 | 3.066912683 | 0.00216282  | 0.012557421 |
| ENSMUSG00000098234 | 1408.022638 | 0.414827301 | 0.144470915 | 2.871355123 | 0.004087161 | 0.021058872 |
| ENSMUSG00000020220 | 36330.34737 | 0.414944299 | 0.108952639 | 3.808483224 | 0.000139822 | 0.001227142 |
| ENSMUSG00000069520 | 1180.02735  | 0.415246683 | 0.136401376 | 3.044299809 | 0.002332226 | 0.013360126 |
| ENSMUSG00000022070 | 4486.70591  | 0.415693299 | 0.10912527  | 3.809322062 | 0.000139348 | 0.001223949 |
| ENSMUSG00000039233 | 2571.285854 | 0.416360817 | 0.111042928 | 3.749548262 | 0.000177153 | 0.001505028 |
| ENSMUSG00000058773 | 23120.73055 | 0.416398457 | 0.136266115 | 3.05577404  | 0.002244804 | 0.012949137 |



|                    |             |             |             |             |             |             |
|--------------------|-------------|-------------|-------------|-------------|-------------|-------------|
| ENSMUSG00000027667 | 1524.901598 | 0.416716584 | 0.150808714 | 2.7632129   | 0.005723542 | 0.027693797 |
| ENSMUSG00000047789 | 993.6878342 | 0.417207325 | 0.125607554 | 3.321514599 | 0.000895303 | 0.006076127 |
| ENSMUSG00000032018 | 1829.404636 | 0.417364315 | 0.126755171 | 3.292680772 | 0.000992371 | 0.006600758 |
| ENSMUSG00000056749 | 1326.077174 | 0.417381168 | 0.201033001 | 2.07618235  | 0.037877089 | 0.122740041 |
| ENSMUSG00000068323 | 2633.950459 | 0.418164292 | 0.211009867 | 1.981728615 | 0.047509623 | 0.14570408  |
| ENSMUSG00000037475 | 7381.970123 | 0.418918064 | 0.139016972 | 3.013431073 | 0.002583117 | 0.014561251 |
| ENSMUSG00000026730 | 1090.381615 | 0.41930321  | 0.129302627 | 3.242805037 | 0.001183592 | 0.007626489 |
| ENSMUSG00000025979 | 2182.125807 | 0.419354392 | 0.111567301 | 3.75875715  | 0.000170759 | 0.001459045 |
| ENSMUSG00000034610 | 2055.397283 | 0.419423851 | 0.12905867  | 3.249869628 | 0.001154579 | 0.007482788 |
| ENSMUSG00000063455 | 581.0155278 | 0.419885919 | 0.184577418 | 2.274849888 | 0.022914936 | 0.083015887 |
| ENSMUSG00000027708 | 2107.912638 | 0.419975839 | 0.099412728 | 4.224568111 | 2.39E-05    | 0.000259042 |
| ENSMUSG00000097769 | 1233.723201 | 0.420209365 | 0.162028574 | 2.593427534 | 0.009502456 | 0.041690788 |
| ENSMUSG00000112150 | 178.6249821 | 0.420281701 | 0.210903185 | 1.992770766 | 0.046286554 | 0.142870096 |
| ENSMUSG00000028274 | 2425.920204 | 0.420552013 | 0.12369233  | 3.399984573 | 0.000673897 | 0.004763413 |
| ENSMUSG00000052906 | 1251.515028 | 0.421483982 | 0.154745734 | 2.723719555 | 0.006455129 | 0.030537938 |
| ENSMUSG00000044340 | 10487.16415 | 0.421542948 | 0.09858219  | 4.276055842 | 1.90E-05    | 0.00021212  |
| ENSMUSG00000112627 | 219.4477025 | 0.421675225 | 0.198378648 | 2.125607921 | 0.03353592  | 0.111799895 |
| ENSMUSG00000055320 | 4370.394096 | 0.421706057 | 0.113819103 | 3.705055173 | 0.000211345 | 0.00175997  |
| ENSMUSG00000071252 | 516.3097306 | 0.421850575 | 0.18376784  | 2.295562575 | 0.021700905 | 0.079531943 |
| ENSMUSG00000023348 | 1969.66108  | 0.421877627 | 0.120587819 | 3.498509473 | 0.000467866 | 0.003504834 |
| ENSMUSG00000035637 | 1544.23038  | 0.422773738 | 0.125516503 | 3.368272118 | 0.000756409 | 0.005246867 |
| ENSMUSG00000014932 | 7133.749873 | 0.423084816 | 0.112599098 | 3.757444103 | 0.000171658 | 0.001463915 |
| ENSMUSG00000073867 | 475.0220179 | 0.423195328 | 0.158284571 | 2.673635994 | 0.007503385 | 0.034524464 |
| ENSMUSG00000006395 | 856.4130936 | 0.423286793 | 0.160590999 | 2.635806459 | 0.008393759 | 0.037777845 |
| ENSMUSG00000029364 | 3709.689402 | 0.42329289  | 0.10585112  | 3.998945797 | 6.36E-05    | 0.000620423 |
| ENSMUSG00000071793 | 1387.757129 | 0.423916769 | 0.138085832 | 3.06995122  | 0.002140937 | 0.012443327 |
| ENSMUSG00000000127 | 1687.534272 | 0.424214972 | 0.128303266 | 3.306345848 | 0.000945213 | 0.00633961  |
| ENSMUSG00000042742 | 762.3797025 | 0.424326111 | 0.123200377 | 3.444194899 | 0.000572763 | 0.00415118  |
| ENSMUSG00000031490 | 1237.107483 | 0.424444487 | 0.18122214  | 2.342122697 | 0.01917441  | 0.072097205 |

|                    |             |             |             |             |             |             |
|--------------------|-------------|-------------|-------------|-------------|-------------|-------------|
| ENSMUSG00000069208 | 459.0782374 | 0.424947988 | 0.167941902 | 2.530327355 | 0.011395615 | 0.048076258 |
| ENSMUSG00000015247 | 1667.017461 | 0.425260404 | 0.107495265 | 3.956084983 | 7.62E-05    | 0.000725352 |
| ENSMUSG00000033307 | 7177.015245 | 0.42532404  | 0.141401322 | 3.007921236 | 0.002630413 | 0.014794663 |
| ENSMUSG00000017418 | 2088.680479 | 0.425760633 | 0.121819716 | 3.495005958 | 0.000474051 | 0.003541864 |
| ENSMUSG00000063275 | 2089.499834 | 0.426203045 | 0.104452175 | 4.080365451 | 4.50E-05    | 0.000457256 |
| ENSMUSG00000034269 | 16792.98825 | 0.426644402 | 0.107268615 | 3.977346065 | 6.97E-05    | 0.00067162  |
| ENSMUSG00000062014 | 3246.501296 | 0.426948705 | 0.137445408 | 3.106314794 | 0.001894349 | 0.011262566 |
| ENSMUSG00000053398 | 5178.829009 | 0.427059365 | 0.142347518 | 3.000118104 | 0.002698749 | 0.015095262 |
| ENSMUSG00000030452 | 2086.736277 | 0.427126125 | 0.125957264 | 3.391040035 | 0.000696279 | 0.004896495 |
| ENSMUSG00000029276 | 731.7338178 | 0.427484485 | 0.145833226 | 2.931324337 | 0.003375202 | 0.018063446 |
| ENSMUSG00000034858 | 1141.569774 | 0.427633944 | 0.161268811 | 2.651684117 | 0.008009143 | 0.03637717  |
| ENSMUSG00000043929 | 629.0519797 | 0.428040194 | 0.144578416 | 2.960609237 | 0.003070312 | 0.016761575 |
| ENSMUSG00000029402 | 490.6240035 | 0.428550866 | 0.135205798 | 3.169619006 | 0.001526389 | 0.009414094 |
| ENSMUSG00000025809 | 11457.7974  | 0.428560061 | 0.109243604 | 3.922976226 | 8.75E-05    | 0.000816786 |
| ENSMUSG00000042215 | 316.6409248 | 0.429310898 | 0.205791169 | 2.086148303 | 0.036965191 | 0.120330982 |
| ENSMUSG00000075706 | 6339.230633 | 0.429718508 | 0.128000506 | 3.357162579 | 0.000787468 | 0.005420908 |
| ENSMUSG00000040033 | 2068.031864 | 0.430225434 | 0.151044323 | 2.848338993 | 0.004394808 | 0.022310181 |
| ENSMUSG00000110458 | 327.7040998 | 0.430441977 | 0.163124172 | 2.638738161 | 0.008321523 | 0.037543653 |
| ENSMUSG00000030657 | 1848.010094 | 0.430529378 | 0.120287909 | 3.579157555 | 0.000344704 | 0.002688785 |
| ENSMUSG00000012519 | 1113.522073 | 0.43059844  | 0.143227298 | 3.006399253 | 0.002643616 | 0.014850199 |
| ENSMUSG00000031790 | 6260.202851 | 0.430745736 | 0.123824078 | 3.478691259 | 0.000503869 | 0.003736873 |
| ENSMUSG00000032192 | 270.6819425 | 0.431051828 | 0.185207515 | 2.327399226 | 0.019944027 | 0.074289585 |
| ENSMUSG00000049775 | 29170.82109 | 0.431176696 | 0.111787665 | 3.857104396 | 0.000114738 | 0.001031349 |
| ENSMUSG00000035929 | 6595.686421 | 0.431350685 | 0.174023423 | 2.478693262 | 0.013186465 | 0.053770591 |
| ENSMUSG00000034427 | 18590.57693 | 0.431454748 | 0.13751074  | 3.137607647 | 0.001703327 | 0.010311047 |
| ENSMUSG00000022817 | 500.1345394 | 0.431975628 | 0.189026283 | 2.285267539 | 0.022297145 | 0.081302916 |
| ENSMUSG00000028550 | 1158.671976 | 0.432715891 | 0.137977826 | 3.136126322 | 0.001711954 | 0.01036046  |
| ENSMUSG00000039456 | 4922.858296 | 0.43274388  | 0.124152472 | 3.485584097 | 0.000491064 | 0.00365284  |
| ENSMUSG00000053453 | 4861.410264 | 0.432941416 | 0.096115185 | 4.504401849 | 6.66E-06    | 8.31E-05    |

|                    |             |             |             |             |             |             |
|--------------------|-------------|-------------|-------------|-------------|-------------|-------------|
| ENSMUSG00000033577 | 25392.44301 | 0.433016811 | 0.110248237 | 3.927652939 | 8.58E-05    | 0.000804777 |
| ENSMUSG00000052681 | 3266.836159 | 0.433385588 | 0.105156379 | 4.121343761 | 3.77E-05    | 0.000388533 |
| ENSMUSG00000105199 | 508.9860164 | 0.433426818 | 0.179974819 | 2.408263671 | 0.0160286   | 0.062687957 |
| ENSMUSG00000003528 | 8032.74513  | 0.43359541  | 0.113986831 | 3.803907927 | 0.000142431 | 0.001244654 |
| ENSMUSG00000051379 | 1711.54716  | 0.434295757 | 0.200213108 | 2.169167447 | 0.030069974 | 0.102474096 |
| ENSMUSG00000055415 | 11168.1913  | 0.434300554 | 0.156276933 | 2.779044522 | 0.005451905 | 0.026622058 |
| ENSMUSG00000079658 | 2096.453194 | 0.434330214 | 0.133933328 | 3.242883766 | 0.001183265 | 0.007626489 |
| ENSMUSG00000058056 | 2927.674578 | 0.434530566 | 0.121301295 | 3.582241761 | 0.000340658 | 0.002662818 |
| ENSMUSG00000045205 | 1531.335501 | 0.434645571 | 0.122164815 | 3.557862156 | 0.000373885 | 0.002890128 |
| ENSMUSG00000053253 | 4387.746086 | 0.43531678  | 0.136628569 | 3.186132901 | 0.001441883 | 0.008974447 |
| ENSMUSG00000071637 | 2745.042161 | 0.435492131 | 0.165579041 | 2.630116277 | 0.008535567 | 0.038307844 |
| ENSMUSG00000025017 | 2008.187525 | 0.436010099 | 0.153129794 | 2.847323749 | 0.00440885  | 0.022364448 |
| ENSMUSG00000025314 | 5358.326222 | 0.436607702 | 0.125003232 | 3.492771323 | 0.000478036 | 0.003566636 |
| ENSMUSG00000036372 | 1861.160424 | 0.436929148 | 0.146700373 | 2.978377901 | 0.002897785 | 0.015984045 |
| ENSMUSG00000018362 | 7225.303795 | 0.437227751 | 0.103065976 | 4.242212288 | 2.21E-05    | 0.000241715 |
| ENSMUSG00000049791 | 502.7017706 | 0.437767661 | 0.170741517 | 2.563920415 | 0.010349727 | 0.044574984 |
| ENSMUSG00000018001 | 1287.610064 | 0.438079213 | 0.141118306 | 3.10434008  | 0.00190704  | 0.011325938 |
| ENSMUSG00000029385 | 3504.109852 | 0.438132375 | 0.195180135 | 2.244759047 | 0.024783605 | 0.088431868 |
| ENSMUSG00000020521 | 1409.519048 | 0.438308844 | 0.108780132 | 4.029309733 | 5.59E-05    | 0.000552497 |
| ENSMUSG00000019942 | 5063.656971 | 0.438654443 | 0.102148545 | 4.294279896 | 1.75E-05    | 0.000198099 |
| ENSMUSG00000063406 | 2017.647694 | 0.439254053 | 0.134976922 | 3.254290038 | 0.001136762 | 0.00738448  |
| ENSMUSG00000114279 | 9146.634852 | 0.439319722 | 0.139411041 | 3.151254872 | 0.001625706 | 0.009933172 |
| ENSMUSG00000040560 | 1826.031227 | 0.439550492 | 0.129289481 | 3.399739015 | 0.000674502 | 0.004766182 |
| ENSMUSG00000020131 | 626.7074075 | 0.440869048 | 0.174608723 | 2.524897047 | 0.011573219 | 0.048568753 |
| ENSMUSG00000042622 | 1729.34915  | 0.441160794 | 0.222790017 | 1.980164102 | 0.047685092 | 0.14603926  |
| ENSMUSG00000024661 | 40881.4549  | 0.441728868 | 0.131030967 | 3.371179172 | 0.000748472 | 0.005201516 |
| ENSMUSG00000022184 | 597.1979319 | 0.442382776 | 0.141504918 | 3.126271391 | 0.001770381 | 0.010645701 |
| ENSMUSG00000068523 | 4005.792088 | 0.442450608 | 0.099567909 | 4.443706923 | 8.84E-06    | 0.000106532 |
| ENSMUSG00000113769 | 276.6458972 | 0.442551629 | 0.176098088 | 2.5130973   | 0.011967632 | 0.04986737  |

|                    |             |             |             |             |             |             |
|--------------------|-------------|-------------|-------------|-------------|-------------|-------------|
| ENSMUSG00000029084 | 5128.368157 | 0.443284743 | 0.096656771 | 4.586173736 | 4.51E-06    | 5.89E-05    |
| ENSMUSG00000048410 | 4840.450081 | 0.443388608 | 0.128616012 | 3.447382646 | 0.000566046 | 0.004109179 |
| ENSMUSG00000031530 | 3029.708709 | 0.443653729 | 0.155192697 | 2.858728139 | 0.004253431 | 0.021726013 |
| ENSMUSG00000033985 | 693.0835124 | 0.443694181 | 0.18848495  | 2.354003225 | 0.01857245  | 0.070260255 |
| ENSMUSG00000097536 | 423.3995832 | 0.444118463 | 0.179481409 | 2.474453848 | 0.013344006 | 0.054248537 |
| ENSMUSG00000096401 | 503.5732024 | 0.444622125 | 0.147030663 | 3.024009522 | 0.002494486 | 0.014133519 |
| ENSMUSG00000107362 | 205.5624109 | 0.446009976 | 0.225103914 | 1.981351492 | 0.04755187  | 0.145786946 |
| ENSMUSG00000028573 | 608.2848201 | 0.446058981 | 0.167938074 | 2.656092043 | 0.007905203 | 0.035978356 |
| ENSMUSG00000044155 | 1760.753716 | 0.446747039 | 0.111538213 | 4.005327221 | 6.19E-05    | 0.000605497 |
| ENSMUSG00000030424 | 472.3057795 | 0.446980838 | 0.144158585 | 3.100618929 | 0.001931166 | 0.011450929 |
| ENSMUSG00000021936 | 1855.93487  | 0.447116637 | 0.106569598 | 4.195536511 | 2.72E-05    | 0.000290197 |
| ENSMUSG00000030850 | 2185.920672 | 0.447327734 | 0.105407202 | 4.243806166 | 2.20E-05    | 0.000240357 |
| ENSMUSG00000064380 | 296.8790639 | 0.447336956 | 0.161353959 | 2.772395293 | 0.005564542 | 0.027041806 |
| ENSMUSG00000031600 | 2454.492821 | 0.447489911 | 0.115197967 | 3.88452958  | 0.000102528 | 0.000937083 |
| ENSMUSG00000038365 | 1767.518342 | 0.447606281 | 0.158018315 | 2.832622798 | 0.004616783 | 0.023220315 |
| ENSMUSG00000020386 | 2141.831869 | 0.447873864 | 0.098813322 | 4.532525122 | 5.83E-06    | 7.39E-05    |
| ENSMUSG00000042208 | 1148.681984 | 0.447914108 | 0.12391924  | 3.61456467  | 0.000300853 | 0.002396819 |
| ENSMUSG00000021621 | 1262.864998 | 0.447987559 | 0.117085278 | 3.826164706 | 0.000130155 | 0.001152737 |
| ENSMUSG00000054099 | 479.0289279 | 0.448019748 | 0.146626028 | 3.055526719 | 0.002246656 | 0.012956471 |
| ENSMUSG00000031458 | 641.7094585 | 0.448204453 | 0.148522559 | 3.017753366 | 0.002546561 | 0.014399303 |
| ENSMUSG00000016262 | 251.1740251 | 0.448505975 | 0.174473207 | 2.570629516 | 0.010151386 | 0.043881772 |
| ENSMUSG00000073647 | 652.7020977 | 0.448831093 | 0.13893334  | 3.230549945 | 0.001235523 | 0.007890436 |
| ENSMUSG00000025289 | 2965.105018 | 0.448913866 | 0.105927127 | 4.237949987 | 2.26E-05    | 0.000245358 |
| ENSMUSG00000027615 | 1254.809046 | 0.449259632 | 0.139476578 | 3.221039962 | 0.001277263 | 0.008119798 |
| ENSMUSG00000026767 | 975.9277499 | 0.449300371 | 0.118318662 | 3.797375369 | 0.000146236 | 0.001271925 |
| ENSMUSG00000037410 | 3782.613407 | 0.449568678 | 0.108873349 | 4.129281237 | 3.64E-05    | 0.000377281 |
| ENSMUSG00000068184 | 756.0104863 | 0.449898636 | 0.12580194  | 3.576245622 | 0.000348564 | 0.002716048 |
| ENSMUSG00000024725 | 2346.885063 | 0.450163236 | 0.102513561 | 4.391255493 | 1.13E-05    | 0.000132487 |
| ENSMUSG00000032501 | 10721.21453 | 0.45029758  | 0.133285121 | 3.378453473 | 0.000728948 | 0.005084849 |

|                    |             |             |             |             |             |             |
|--------------------|-------------|-------------|-------------|-------------|-------------|-------------|
| ENSMUSG00000026034 | 14566.99476 | 0.450349895 | 0.124167738 | 3.626947737 | 0.000286791 | 0.002294845 |
| ENSMUSG00000086316 | 608.8006863 | 0.450583693 | 0.132412426 | 3.402880725 | 0.000666794 | 0.004728194 |
| ENSMUSG00000101972 | 9143.054884 | 0.451042724 | 0.111077535 | 4.060611591 | 4.89E-05    | 0.00049278  |
| ENSMUSG00000026426 | 846.1549345 | 0.451079379 | 0.136234577 | 3.311049148 | 0.000929469 | 0.006262261 |
| ENSMUSG00000020225 | 1300.670305 | 0.451195994 | 0.126159194 | 3.576402014 | 0.000348356 | 0.002715373 |
| ENSMUSG00000036989 | 552.3565515 | 0.451264671 | 0.140180866 | 3.219160254 | 0.001285666 | 0.008149983 |
| ENSMUSG00000020817 | 4389.565096 | 0.45158978  | 0.114968643 | 3.927938699 | 8.57E-05    | 0.00080416  |
| ENSMUSG00000025326 | 6279.630982 | 0.451770239 | 0.105285927 | 4.290889134 | 1.78E-05    | 0.000200742 |
| ENSMUSG00000024163 | 7006.129007 | 0.451785359 | 0.106052768 | 4.260005361 | 2.04E-05    | 0.000225684 |
| ENSMUSG00000005615 | 2616.731914 | 0.452080563 | 0.123278633 | 3.667144504 | 0.000245274 | 0.001998487 |
| ENSMUSG00000038535 | 3600.25057  | 0.452221353 | 0.117433115 | 3.850884406 | 0.000117692 | 0.001053653 |
| ENSMUSG00000061474 | 705.4827368 | 0.452639882 | 0.176450874 | 2.565245905 | 0.010310271 | 0.044430791 |
| ENSMUSG00000005667 | 2213.233998 | 0.452830602 | 0.132807847 | 3.409667524 | 0.000650421 | 0.004628284 |
| ENSMUSG00000084957 | 1198.313791 | 0.452966359 | 0.10937476  | 4.141415812 | 3.45E-05    | 0.000359198 |
| ENSMUSG00000056342 | 18145.05543 | 0.453248425 | 0.133066484 | 3.406180226 | 0.000658787 | 0.004681837 |
| ENSMUSG00000031255 | 606.1669054 | 0.453300847 | 0.15903957  | 2.850239386 | 0.004368634 | 0.022212699 |
| ENSMUSG00000032966 | 6369.946488 | 0.453467864 | 0.116223228 | 3.901697393 | 9.55E-05    | 0.000882072 |
| ENSMUSG00000056763 | 5616.663466 | 0.453482008 | 0.114370697 | 3.965019191 | 7.34E-05    | 0.000703038 |
| ENSMUSG00000020128 | 4632.157064 | 0.454204408 | 0.134799851 | 3.369472624 | 0.000753122 | 0.005227316 |
| ENSMUSG00000040415 | 357.3803195 | 0.454220102 | 0.219873569 | 2.065824031 | 0.038845098 | 0.125294263 |
| ENSMUSG00000025035 | 260.5608452 | 0.454341459 | 0.179034476 | 2.537731663 | 0.01115735  | 0.047250295 |
| ENSMUSG00000025198 | 2321.570502 | 0.454517606 | 0.132423778 | 3.432296016 | 0.000598494 | 0.004319422 |
| ENSMUSG00000049823 | 1300.455205 | 0.454592452 | 0.112159125 | 4.053102697 | 5.05E-05    | 0.000506278 |
| ENSMUSG00000023030 | 3027.845963 | 0.454798796 | 0.103047381 | 4.413492026 | 1.02E-05    | 0.000120723 |
| ENSMUSG00000018604 | 3592.966242 | 0.455107226 | 0.13818551  | 3.293451144 | 0.000989655 | 0.006592086 |
| ENSMUSG00000070661 | 6936.478576 | 0.455264291 | 0.118262621 | 3.849604281 | 0.000118309 | 0.001057901 |
| ENSMUSG00000015889 | 12294.64577 | 0.455427186 | 0.090472433 | 5.03387797  | 4.81E-07    | 7.77E-06    |
| ENSMUSG00000075704 | 1973.3235   | 0.456020541 | 0.108711235 | 4.194787616 | 2.73E-05    | 0.000291018 |
| ENSMUSG00000025006 | 788.5593737 | 0.456047959 | 0.16246189  | 2.807107314 | 0.004998859 | 0.024819865 |

|                    |             |             |             |             |             |             |
|--------------------|-------------|-------------|-------------|-------------|-------------|-------------|
| ENSMUSG00000028300 | 504.8144434 | 0.456170769 | 0.137786911 | 3.31069741  | 0.000930638 | 0.006268243 |
| ENSMUSG00000006638 | 353.7973    | 0.456649003 | 0.174932362 | 2.610431812 | 0.0090428   | 0.040060286 |
| ENSMUSG00000037072 | 6960.946187 | 0.456863478 | 0.100465146 | 4.547482326 | 5.43E-06    | 6.91E-05    |
| ENSMUSG00000061111 | 1487.938494 | 0.457249126 | 0.118185525 | 3.868909711 | 0.000109323 | 0.000989454 |
| ENSMUSG00000019256 | 2282.730446 | 0.457916806 | 0.111038412 | 4.123949537 | 3.72E-05    | 0.000385052 |
| ENSMUSG00000039629 | 1204.926201 | 0.458001621 | 0.185197221 | 2.473048028 | 0.013396614 | 0.054428472 |
| ENSMUSG00000028519 | 2636.473147 | 0.458439062 | 0.214197581 | 2.140262555 | 0.032333554 | 0.108725964 |
| ENSMUSG00000097277 | 287.1823558 | 0.458968467 | 0.194663985 | 2.357747208 | 0.018386209 | 0.069768733 |
| ENSMUSG00000024338 | 6776.004788 | 0.459665636 | 0.206374981 | 2.227332174 | 0.025925082 | 0.091552692 |
| ENSMUSG00000024145 | 743.3184773 | 0.459856495 | 0.161414342 | 2.848919671 | 0.004386795 | 0.022284721 |
| ENSMUSG00000037139 | 773.1273398 | 0.459992045 | 0.200996162 | 2.28856133  | 0.022104853 | 0.080707322 |
| ENSMUSG00000028756 | 3392.590603 | 0.460033821 | 0.155086125 | 2.966311917 | 0.003013946 | 0.01650684  |
| ENSMUSG00000059811 | 7023.792657 | 0.460145942 | 0.135697431 | 3.390970191 | 0.000696457 | 0.004896495 |
| ENSMUSG00000036053 | 2988.842514 | 0.460151856 | 0.15505497  | 2.967669182 | 0.003000671 | 0.016450183 |
| ENSMUSG00000037646 | 17085.45529 | 0.460734716 | 0.135016077 | 3.412443366 | 0.000643833 | 0.004588725 |
| ENSMUSG00000024640 | 1602.891771 | 0.460889443 | 0.163950635 | 2.811147663 | 0.004936512 | 0.024600931 |
| ENSMUSG00000069273 | 21666.15448 | 0.46095527  | 0.122942089 | 3.749369102 | 0.00017728  | 0.00150553  |
| ENSMUSG00000072761 | 320.6986146 | 0.461047449 | 0.167685888 | 2.74947077  | 0.005969159 | 0.028615264 |
| ENSMUSG00000046785 | 3151.360582 | 0.461418974 | 0.132754614 | 3.475728338 | 0.000509468 | 0.003770875 |
| ENSMUSG00000025920 | 1667.102429 | 0.461499723 | 0.125964662 | 3.663723753 | 0.000248575 | 0.002020214 |
| ENSMUSG00000054169 | 2376.454714 | 0.461508708 | 0.182277914 | 2.531895923 | 0.011344766 | 0.047880323 |
| ENSMUSG00000029161 | 1447.048179 | 0.461741616 | 0.180415708 | 2.559320476 | 0.010487701 | 0.044995425 |
| ENSMUSG00000028874 | 614.8243934 | 0.462029621 | 0.156239769 | 2.957183211 | 0.003104636 | 0.016891067 |
| ENSMUSG00000030042 | 1673.308281 | 0.462209454 | 0.105650607 | 4.374886881 | 1.21E-05    | 0.000142155 |
| ENSMUSG00000023249 | 607.2900001 | 0.46226728  | 0.179382537 | 2.576991533 | 0.009966439 | 0.043266802 |
| ENSMUSG00000050931 | 2705.983355 | 0.462495553 | 0.135691773 | 3.408427376 | 0.000653385 | 0.004647889 |
| ENSMUSG00000035372 | 776.8170755 | 0.462622401 | 0.14007713  | 3.302626206 | 0.00095784  | 0.006412724 |
| ENSMUSG00000041695 | 1032.525289 | 0.462804096 | 0.204316569 | 2.265132472 | 0.023504551 | 0.084763099 |
| ENSMUSG00000047246 | 8543.678919 | 0.462884423 | 0.127914528 | 3.618700935 | 0.000296086 | 0.00236328  |

|                    |             |             |             |             |             |             |
|--------------------|-------------|-------------|-------------|-------------|-------------|-------------|
| ENSMUSG00000064090 | 923.9328928 | 0.463555559 | 0.125726713 | 3.687009286 | 0.000226905 | 0.001870688 |
| ENSMUSG00000106475 | 462.7066367 | 0.463844782 | 0.173182325 | 2.678360978 | 0.007398344 | 0.03416659  |
| ENSMUSG00000104214 | 268.11798   | 0.464461992 | 0.191132017 | 2.430058546 | 0.015096384 | 0.059808929 |
| ENSMUSG00000022280 | 2149.470985 | 0.464553738 | 0.117421812 | 3.956281473 | 7.61E-05    | 0.000725192 |
| ENSMUSG00000025189 | 1238.460719 | 0.464844848 | 0.152453913 | 3.049084389 | 0.0022954   | 0.013183032 |
| ENSMUSG00000031169 | 268.4463973 | 0.465174603 | 0.18525298  | 2.511023586 | 0.012038165 | 0.050058386 |
| ENSMUSG00000020859 | 7738.923739 | 0.465950569 | 0.117570391 | 3.963162519 | 7.40E-05    | 0.000707315 |
| ENSMUSG00000078671 | 11748.29594 | 0.466118753 | 0.111411468 | 4.183759178 | 2.87E-05    | 0.000304346 |
| ENSMUSG00000014782 | 190.5390737 | 0.466272711 | 0.19907514  | 2.342194562 | 0.019170718 | 0.072097205 |
| ENSMUSG00000021895 | 440.9947623 | 0.46630821  | 0.195615212 | 2.383803418 | 0.017134753 | 0.066008312 |
| ENSMUSG00000005089 | 1100.980675 | 0.466487941 | 0.229983332 | 2.028355435 | 0.042523985 | 0.13390672  |
| ENSMUSG00000015733 | 5100.36085  | 0.466707646 | 0.105067385 | 4.441984036 | 8.91E-06    | 0.000107272 |
| ENSMUSG00000050029 | 1362.084893 | 0.46678518  | 0.106261764 | 4.39278593  | 1.12E-05    | 0.000131835 |
| ENSMUSG00000039364 | 2738.416636 | 0.467697111 | 0.155988785 | 2.99827396  | 0.002715135 | 0.015179299 |
| ENSMUSG00000052565 | 25186.15609 | 0.46771288  | 0.108475102 | 4.311707216 | 1.62E-05    | 0.000184606 |
| ENSMUSG00000022040 | 3920.742261 | 0.46775337  | 0.162711365 | 2.874743083 | 0.004043564 | 0.020864303 |
| ENSMUSG00000032220 | 6934.284586 | 0.467951077 | 0.198542775 | 2.35692826  | 0.018426806 | 0.06991089  |
| ENSMUSG00000035293 | 3300.63304  | 0.468018632 | 0.14803132  | 3.161618981 | 0.001568947 | 0.009638867 |
| ENSMUSG00000036391 | 5973.997092 | 0.468037893 | 0.095609287 | 4.895318324 | 9.81E-07    | 1.48E-05    |
| ENSMUSG00000043467 | 1537.674233 | 0.468198408 | 0.138712888 | 3.375305754 | 0.000737337 | 0.005136944 |
| ENSMUSG00000016308 | 1710.932256 | 0.46821344  | 0.121079608 | 3.866988411 | 0.000110188 | 0.000996066 |
| ENSMUSG00000017929 | 1844.742429 | 0.468492269 | 0.145117191 | 3.228371946 | 0.00124497  | 0.007939397 |
| ENSMUSG00000104814 | 140.0294394 | 0.468740864 | 0.225861835 | 2.075343383 | 0.037954721 | 0.122938016 |
| ENSMUSG00000022452 | 2933.833236 | 0.468758077 | 0.121139636 | 3.869568157 | 0.000109028 | 0.00098839  |
| ENSMUSG00000026082 | 3094.492214 | 0.468898086 | 0.116130954 | 4.037666685 | 5.40E-05    | 0.000535795 |
| ENSMUSG00000007041 | 8336.7659   | 0.468964672 | 0.138321345 | 3.390399875 | 0.000697907 | 0.004905148 |
| ENSMUSG00000022848 | 1928.949439 | 0.469089385 | 0.130934924 | 3.582614714 | 0.000340172 | 0.002659951 |
| ENSMUSG00000096975 | 171.5461815 | 0.47000074  | 0.217240601 | 2.163503226 | 0.030502496 | 0.103631347 |
| ENSMUSG00000031639 | 1231.037257 | 0.470300321 | 0.179008407 | 2.627252699 | 0.008607738 | 0.038554162 |

|                    |             |             |             |             |             |             |
|--------------------|-------------|-------------|-------------|-------------|-------------|-------------|
| ENSMUSG00000033114 | 262.7302545 | 0.470551936 | 0.170008555 | 2.767813284 | 0.005643378 | 0.027371241 |
| ENSMUSG00000034371 | 6475.519163 | 0.470587354 | 0.144037956 | 3.267106588 | 0.001086528 | 0.007132956 |
| ENSMUSG00000086942 | 163.9472785 | 0.471171525 | 0.214524559 | 2.196352378 | 0.028066731 | 0.097297712 |
| ENSMUSG00000040651 | 3757.849584 | 0.471347125 | 0.145025456 | 3.250099255 | 0.001153647 | 0.007481096 |
| ENSMUSG00000027087 | 2022.849601 | 0.471563625 | 0.102815221 | 4.586515682 | 4.51E-06    | 5.89E-05    |
| ENSMUSG00000085502 | 302.2658387 | 0.471673579 | 0.223877799 | 2.106833184 | 0.035132042 | 0.115762362 |
| ENSMUSG00000035000 | 8347.651304 | 0.472150244 | 0.116950817 | 4.037169271 | 5.41E-05    | 0.000536693 |
| ENSMUSG00000071528 | 5393.678619 | 0.472341657 | 0.128160995 | 3.685533641 | 0.000228224 | 0.001880865 |
| ENSMUSG00000038422 | 1956.698307 | 0.472509338 | 0.206570593 | 2.287398853 | 0.022172553 | 0.080901523 |
| ENSMUSG00000026721 | 7707.639977 | 0.472904787 | 0.103362951 | 4.575186581 | 4.76E-06    | 6.18E-05    |
| ENSMUSG00000073481 | 13296.31411 | 0.473108732 | 0.12398599  | 3.815824124 | 0.000135729 | 0.001193571 |
| ENSMUSG00000021134 | 33158.6921  | 0.473384193 | 0.11164602  | 4.240045411 | 2.23E-05    | 0.000243702 |
| ENSMUSG00000040472 | 3095.051103 | 0.473700771 | 0.113118064 | 4.187666875 | 2.82E-05    | 0.000299583 |
| ENSMUSG00000090946 | 1350.102427 | 0.473782628 | 0.134132713 | 3.532193    | 0.000412128 | 0.003146483 |
| ENSMUSG00000042492 | 3446.410412 | 0.474020741 | 0.103854089 | 4.564295421 | 5.01E-06    | 6.48E-05    |
| ENSMUSG00000054150 | 198.4122701 | 0.47414363  | 0.222732341 | 2.128759696 | 0.033274147 | 0.111109309 |
| ENSMUSG00000039007 | 2232.593338 | 0.474150906 | 0.111713878 | 4.244333046 | 2.19E-05    | 0.00023991  |
| ENSMUSG00000031176 | 1826.002914 | 0.47416725  | 0.101783752 | 4.658575086 | 3.18E-06    | 4.29E-05    |
| ENSMUSG00000000296 | 333.886092  | 0.474212009 | 0.190412915 | 2.490440356 | 0.012758491 | 0.052370164 |
| ENSMUSG00000041189 | 161.5073902 | 0.474806641 | 0.237800734 | 1.99665759  | 0.045862392 | 0.141910621 |
| ENSMUSG00000030086 | 847.0685759 | 0.475225732 | 0.140104488 | 3.391937973 | 0.000694001 | 0.004885394 |
| ENSMUSG00000096954 | 876.1418034 | 0.475381907 | 0.150342223 | 3.161998656 | 0.001566903 | 0.009629402 |
| ENSMUSG00000037652 | 5960.9121   | 0.475551707 | 0.098588856 | 4.823584786 | 1.41E-06    | 2.05E-05    |
| ENSMUSG00000103732 | 163.8584538 | 0.475563918 | 0.22195549  | 2.142609398 | 0.032144476 | 0.108188041 |
| ENSMUSG00000029810 | 7350.553286 | 0.475727294 | 0.128768832 | 3.694428889 | 0.000220382 | 0.001825679 |
| ENSMUSG00000063179 | 1375.457063 | 0.475814712 | 0.114473077 | 4.156564361 | 3.23E-05    | 0.00033857  |
| ENSMUSG00000061244 | 2965.041182 | 0.475832643 | 0.097343267 | 4.888192636 | 1.02E-06    | 1.53E-05    |
| ENSMUSG00000000355 | 1171.591083 | 0.476360146 | 0.120105276 | 3.966188352 | 7.30E-05    | 0.000700804 |
| ENSMUSG00000102758 | 495.8765291 | 0.476627966 | 0.187596782 | 2.540704386 | 0.011062941 | 0.046939622 |



|                    |             |             |             |             |             |             |
|--------------------|-------------|-------------|-------------|-------------|-------------|-------------|
| ENSMUSG00000011831 | 4565.148334 | 0.477163106 | 0.112371427 | 4.246302789 | 2.17E-05    | 0.000238439 |
| ENSMUSG00000028603 | 7410.811933 | 0.477261919 | 0.113073513 | 4.220810939 | 2.43E-05    | 0.00026276  |
| ENSMUSG00000022338 | 2812.721377 | 0.477288555 | 0.109657536 | 4.35253765  | 1.35E-05    | 0.000156143 |
| ENSMUSG00000049411 | 235.8961631 | 0.478168365 | 0.18189471  | 2.62881952  | 0.008568182 | 0.038431019 |
| ENSMUSG00000024383 | 3199.023974 | 0.478203662 | 0.116077878 | 4.119679567 | 3.79E-05    | 0.000391169 |
| ENSMUSG00000067455 | 7076.933589 | 0.478556467 | 0.120302212 | 3.97795236  | 6.95E-05    | 0.000670557 |
| ENSMUSG00000103899 | 462.7224928 | 0.478926486 | 0.209123241 | 2.290163843 | 0.022011821 | 0.080420316 |
| ENSMUSG00000067916 | 383.6622501 | 0.479054068 | 0.154691805 | 3.096829008 | 0.001956027 | 0.011576792 |
| ENSMUSG00000090863 | 124.1355476 | 0.479054184 | 0.227700855 | 2.103875211 | 0.035389334 | 0.116420937 |
| ENSMUSG00000020580 | 8902.511742 | 0.479854436 | 0.139842604 | 3.43138945  | 0.000600498 | 0.004325485 |
| ENSMUSG00000032766 | 549.8955375 | 0.480061733 | 0.147762031 | 3.248884233 | 0.001158586 | 0.007499185 |
| ENSMUSG00000110830 | 125.5839122 | 0.480391384 | 0.231632727 | 2.073935707 | 0.038085282 | 0.123265138 |
| ENSMUSG00000012076 | 1038.958782 | 0.480687187 | 0.130026013 | 3.696854    | 0.000218288 | 0.001813049 |
| ENSMUSG00000097235 | 151.3461101 | 0.480978573 | 0.209814965 | 2.29239403  | 0.021882916 | 0.080028028 |
| ENSMUSG00000026388 | 174.419888  | 0.481027657 | 0.20219543  | 2.379023396 | 0.017358574 | 0.06668623  |
| ENSMUSG00000035181 | 7959.901103 | 0.481819402 | 0.145779567 | 3.305123011 | 0.000949347 | 0.006363508 |
| ENSMUSG00000035597 | 4736.658044 | 0.482054553 | 0.1078978   | 4.467695859 | 7.91E-06    | 9.66E-05    |
| ENSMUSG00000003948 | 1090.590005 | 0.482206347 | 0.209064206 | 2.306498836 | 0.021082775 | 0.077700705 |
| ENSMUSG00000103672 | 109.4827577 | 0.482401194 | 0.245476324 | 1.965163832 | 0.049395279 | 0.149829521 |
| ENSMUSG00000035840 | 1102.651853 | 0.483615987 | 0.115367035 | 4.191977241 | 2.77E-05    | 0.000294226 |
| ENSMUSG00000029086 | 31448.76326 | 0.484066771 | 0.113524758 | 4.26397536  | 2.01E-05    | 0.000222149 |
| ENSMUSG00000043153 | 505.9267337 | 0.484286463 | 0.149407915 | 3.241370868 | 0.001189563 | 0.007658148 |
| ENSMUSG00000032369 | 2303.558308 | 0.484383377 | 0.104019619 | 4.656654034 | 3.21E-06    | 4.32E-05    |
| ENSMUSG00000071796 | 672.7345852 | 0.484721656 | 0.155291162 | 3.12137309  | 0.001800098 | 0.010788495 |
| ENSMUSG00000106092 | 158.3550339 | 0.484806862 | 0.224303666 | 2.161386263 | 0.030665514 | 0.104135343 |
| ENSMUSG00000082436 | 188.9672856 | 0.484818074 | 0.226908905 | 2.136619864 | 0.032628923 | 0.109620007 |
| ENSMUSG00000050777 | 357.3808826 | 0.484948596 | 0.214733306 | 2.258376238 | 0.023922213 | 0.085963466 |
| ENSMUSG00000037936 | 658.4553635 | 0.486591189 | 0.14712539  | 3.307323032 | 0.000941922 | 0.006328735 |
| ENSMUSG00000031939 | 33318.00652 | 0.486640913 | 0.102397247 | 4.752480434 | 2.01E-06    | 2.83E-05    |

|                    |             |             |             |             |             |             |
|--------------------|-------------|-------------|-------------|-------------|-------------|-------------|
| ENSMUSG00000021124 | 3380.073542 | 0.486836035 | 0.097559595 | 4.990139978 | 6.03E-07    | 9.45E-06    |
| ENSMUSG00000029152 | 5881.033865 | 0.486975287 | 0.116026116 | 4.197117893 | 2.70E-05    | 0.000288455 |
| ENSMUSG00000108268 | 221.644758  | 0.487748052 | 0.190268236 | 2.563475977 | 0.010362987 | 0.044606249 |
| ENSMUSG00000032352 | 3779.546346 | 0.487839232 | 0.142477597 | 3.423971498 | 0.000617131 | 0.004426709 |
| ENSMUSG00000105167 | 344.9815585 | 0.488270853 | 0.198450461 | 2.460416819 | 0.013877574 | 0.056096388 |
| ENSMUSG00000005656 | 4901.733771 | 0.488593837 | 0.116628318 | 4.189324218 | 2.80E-05    | 0.000297545 |
| ENSMUSG00000114104 | 629.729073  | 0.488701837 | 0.174917028 | 2.793906583 | 0.005207552 | 0.025681914 |
| ENSMUSG00000021140 | 18445.8198  | 0.489373863 | 0.108880197 | 4.494608554 | 6.97E-06    | 8.66E-05    |
| ENSMUSG00000024521 | 4913.015526 | 0.489465091 | 0.143295494 | 3.415774482 | 0.000636009 | 0.004543125 |
| ENSMUSG00000061808 | 1116.134158 | 0.489555561 | 0.240785302 | 2.033162352 | 0.042036123 | 0.132858218 |
| ENSMUSG00000020092 | 153.3833323 | 0.489593317 | 0.225280979 | 2.173256343 | 0.029761029 | 0.101635165 |
| ENSMUSG00000038412 | 1426.072623 | 0.489688086 | 0.106345709 | 4.60468118  | 4.13E-06    | 5.45E-05    |
| ENSMUSG00000020570 | 13589.79668 | 0.48977548  | 0.107760429 | 4.545040166 | 5.49E-06    | 6.98E-05    |
| ENSMUSG00000046782 | 688.1461118 | 0.490528203 | 0.164165365 | 2.988012744 | 0.002807978 | 0.015588929 |
| ENSMUSG00000102635 | 122.6747585 | 0.491141548 | 0.233221027 | 2.105905943 | 0.035212523 | 0.11595902  |
| ENSMUSG00000005501 | 4672.089556 | 0.491506584 | 0.127258064 | 3.862282424 | 0.000112333 | 0.001013402 |
| ENSMUSG00000078974 | 2992.182052 | 0.491542137 | 0.15462705  | 3.178888422 | 0.00147841  | 0.009158675 |
| ENSMUSG00000031613 | 1734.227671 | 0.491968029 | 0.191667579 | 2.566777492 | 0.010264846 | 0.044277819 |
| ENSMUSG00000085154 | 181.7814811 | 0.492111313 | 0.216322277 | 2.274898911 | 0.022911995 | 0.083015887 |
| ENSMUSG00000037325 | 474.1700825 | 0.492436532 | 0.160103649 | 3.075735847 | 0.002099838 | 0.012252351 |
| ENSMUSG00000025647 | 1982.037972 | 0.492721652 | 0.119069374 | 4.138105674 | 3.50E-05    | 0.000363909 |
| ENSMUSG00000078578 | 17748.58322 | 0.493008337 | 0.095100285 | 5.184088943 | 2.17E-07    | 3.79E-06    |
| ENSMUSG00000019122 | 1618.845198 | 0.493180932 | 0.223706131 | 2.204592831 | 0.027482679 | 0.095726738 |
| ENSMUSG00000021108 | 372.5031685 | 0.493493523 | 0.158444611 | 3.114612236 | 0.001841869 | 0.010997894 |
| ENSMUSG00000003123 | 1170.165019 | 0.494370691 | 0.162208948 | 3.047739957 | 0.002305694 | 0.013228524 |
| ENSMUSG00000026342 | 1635.263843 | 0.494507983 | 0.141079931 | 3.505161792 | 0.00045633  | 0.00342939  |
| ENSMUSG00000107286 | 160.0529491 | 0.4948564   | 0.227802566 | 2.17230389  | 0.029832749 | 0.101821263 |
| ENSMUSG00000029238 | 7695.888799 | 0.494973889 | 0.10993586  | 4.502387934 | 6.72E-06    | 8.37E-05    |
| ENSMUSG00000018770 | 18534.1673  | 0.495566551 | 0.1049698   | 4.721039278 | 2.35E-06    | 3.25E-05    |

|                    |             |             |             |             |             |             |
|--------------------|-------------|-------------|-------------|-------------|-------------|-------------|
| ENSMUSG00000028383 | 1064.374241 | 0.495755315 | 0.126292981 | 3.92543839  | 8.66E-05    | 0.000810219 |
| ENSMUSG00000022755 | 7398.752831 | 0.496125502 | 0.127257163 | 3.898605725 | 9.67E-05    | 0.000891931 |
| ENSMUSG00000032842 | 4294.459398 | 0.496252296 | 0.148905032 | 3.332676473 | 0.000860149 | 0.005873295 |
| ENSMUSG00000101037 | 187.1904545 | 0.496459719 | 0.234691909 | 2.115367853 | 0.034398607 | 0.113968704 |
| ENSMUSG00000038451 | 370.7905358 | 0.496465537 | 0.214815895 | 2.311121048 | 0.02082617  | 0.076958477 |
| ENSMUSG00000024299 | 138.1385711 | 0.496619982 | 0.226708148 | 2.190569622 | 0.028482951 | 0.098388832 |
| ENSMUSG00000039105 | 2421.287204 | 0.496779973 | 0.130189331 | 3.815827058 | 0.000135728 | 0.001193571 |
| ENSMUSG00000034738 | 1503.201603 | 0.49743647  | 0.1361149   | 3.654533553 | 0.00025765  | 0.00208183  |
| ENSMUSG00000063077 | 9646.749535 | 0.497469863 | 0.103277815 | 4.816812448 | 1.46E-06    | 2.12E-05    |
| ENSMUSG00000004356 | 10409.60775 | 0.497555929 | 0.154495518 | 3.220520156 | 0.001279582 | 0.008129902 |
| ENSMUSG00000035473 | 4167.922873 | 0.497711872 | 0.129820778 | 3.833838299 | 0.000126159 | 0.001122247 |
| ENSMUSG00000041353 | 478.2906255 | 0.497736666 | 0.142591637 | 3.490644171 | 0.000481858 | 0.003590346 |
| ENSMUSG00000044252 | 1460.152082 | 0.497833571 | 0.130726    | 3.808221569 | 0.00013997  | 0.001227957 |
| ENSMUSG00000027428 | 852.0616013 | 0.498003318 | 0.140255723 | 3.550680904 | 0.000384236 | 0.002954775 |
| ENSMUSG00000026568 | 4702.56113  | 0.49800603  | 0.102832204 | 4.842899498 | 1.28E-06    | 1.88E-05    |
| ENSMUSG00000005774 | 2273.17424  | 0.498489833 | 0.125142142 | 3.983389016 | 6.79E-05    | 0.000657888 |
| ENSMUSG00000035992 | 2161.586371 | 0.498817986 | 0.129726372 | 3.845154816 | 0.000120476 | 0.001075127 |
| ENSMUSG00000021876 | 5957.541678 | 0.499016965 | 0.160393101 | 3.111212153 | 0.00186321  | 0.011112985 |
| ENSMUSG00000045282 | 574.0761624 | 0.499170729 | 0.168710213 | 2.958746362 | 0.003088932 | 0.016821512 |
| ENSMUSG00000074403 | 10865.94167 | 0.499501607 | 0.146860081 | 3.401207492 | 0.000670889 | 0.004745161 |
| ENSMUSG00000016427 | 2410.947109 | 0.500664384 | 0.123211648 | 4.063450117 | 4.84E-05    | 0.000488033 |
| ENSMUSG00000033713 | 6665.562099 | 0.500792813 | 0.115374177 | 4.340597061 | 1.42E-05    | 0.000164106 |
| ENSMUSG00000026576 | 63110.31173 | 0.500826024 | 0.105476184 | 4.748237991 | 2.05E-06    | 2.89E-05    |
| ENSMUSG00000027835 | 1764.512807 | 0.501074031 | 0.111637461 | 4.48840405  | 7.18E-06    | 8.87E-05    |
| ENSMUSG00000021770 | 1448.514577 | 0.50162399  | 0.111260965 | 4.508535328 | 6.53E-06    | 8.17E-05    |
| ENSMUSG00000029644 | 1188.514219 | 0.501863912 | 0.121255074 | 4.1389106   | 3.49E-05    | 0.000362973 |
| ENSMUSG00000020576 | 7303.97155  | 0.502238632 | 0.100568705 | 4.993985254 | 5.91E-07    | 9.29E-06    |
| ENSMUSG00000042632 | 2043.455534 | 0.502539825 | 0.12759985  | 3.938404517 | 8.20E-05    | 0.000773465 |
| ENSMUSG00000021714 | 698.663142  | 0.502719423 | 0.1561397   | 3.219677151 | 0.00128335  | 0.008144564 |

|                    |             |             |             |             |             |             |
|--------------------|-------------|-------------|-------------|-------------|-------------|-------------|
| ENSMUSG00000054509 | 4381.87095  | 0.503585175 | 0.10932838  | 4.606170665 | 4.10E-06    | 5.42E-05    |
| ENSMUSG00000030759 | 675.7178309 | 0.503739889 | 0.156105842 | 3.226912465 | 0.001251337 | 0.007975443 |
| ENSMUSG00000031214 | 1340.903193 | 0.504809122 | 0.121074043 | 4.169424839 | 3.05E-05    | 0.000322293 |
| ENSMUSG00000031661 | 1038.881259 | 0.50483232  | 0.186787398 | 2.702710816 | 0.006877655 | 0.032161584 |
| ENSMUSG00000108211 | 163.3542472 | 0.505445207 | 0.228755747 | 2.209541024 | 0.027137032 | 0.094903345 |
| ENSMUSG00000006050 | 4913.117241 | 0.505468374 | 0.145630594 | 3.470894124 | 0.000518728 | 0.003823437 |
| ENSMUSG00000021838 | 121.6707438 | 0.505561366 | 0.229967967 | 2.198399075 | 0.02792068  | 0.096896837 |
| ENSMUSG00000021213 | 3582.91428  | 0.505628657 | 0.157229572 | 3.215862334 | 0.001300532 | 0.008230183 |
| ENSMUSG00000030557 | 2423.985141 | 0.505971206 | 0.101576609 | 4.981178337 | 6.32E-07    | 9.89E-06    |
| ENSMUSG00000073079 | 262.4325181 | 0.506514475 | 0.185491019 | 2.730668451 | 0.006320602 | 0.029996968 |
| ENSMUSG00000058063 | 2250.382738 | 0.507144843 | 0.140461563 | 3.610559595 | 0.000305537 | 0.002426561 |
| ENSMUSG00000022330 | 1272.062892 | 0.507199666 | 0.116411142 | 4.356968381 | 1.32E-05    | 0.000153176 |
| ENSMUSG00000099843 | 163.7173943 | 0.507243632 | 0.236648755 | 2.143445178 | 0.032077369 | 0.108027393 |
| ENSMUSG00000090247 | 144.7560759 | 0.507407254 | 0.208171463 | 2.43744867  | 0.014791314 | 0.058935339 |
| ENSMUSG00000019838 | 5464.024736 | 0.507430622 | 0.115512089 | 4.392878922 | 1.12E-05    | 0.000131835 |
| ENSMUSG00000005873 | 520.2565757 | 0.50788903  | 0.209101038 | 2.428916829 | 0.015144006 | 0.059965639 |
| ENSMUSG00000022451 | 7815.425757 | 0.507935121 | 0.116569675 | 4.357352106 | 1.32E-05    | 0.000152987 |
| ENSMUSG00000026771 | 1638.041367 | 0.507969586 | 0.114180745 | 4.448820016 | 8.63E-06    | 0.000104278 |
| ENSMUSG00000027580 | 9583.70339  | 0.508244761 | 0.132748702 | 3.828623191 | 0.000128862 | 0.00114401  |
| ENSMUSG00000020105 | 7333.454189 | 0.508686751 | 0.128745715 | 3.951096574 | 7.78E-05    | 0.000738877 |
| ENSMUSG00000019975 | 615.6653812 | 0.50887858  | 0.130935556 | 3.886481232 | 0.000101708 | 0.000929965 |
| ENSMUSG00000032308 | 1365.57828  | 0.508879135 | 0.132974095 | 3.826904294 | 0.000129765 | 0.001150651 |
| ENSMUSG00000020952 | 2996.46701  | 0.508922618 | 0.113370061 | 4.489038922 | 7.15E-06    | 8.84E-05    |
| ENSMUSG00000037816 | 520.0670531 | 0.508995588 | 0.135682541 | 3.751371288 | 0.00017587  | 0.001495264 |
| ENSMUSG00000021360 | 810.8951489 | 0.509215753 | 0.200632941 | 2.538046602 | 0.011147314 | 0.047216761 |
| ENSMUSG00000021794 | 22154.15421 | 0.509482027 | 0.135314131 | 3.765179752 | 0.000166429 | 0.001424229 |
| ENSMUSG00000004071 | 4547.354302 | 0.509743547 | 0.13629243  | 3.74007234  | 0.000183967 | 0.001554625 |
| ENSMUSG00000044072 | 219.372961  | 0.50982824  | 0.220826189 | 2.308730871 | 0.02095852  | 0.07734502  |
| ENSMUSG00000069306 | 9228.888877 | 0.510094218 | 0.128879743 | 3.957908402 | 7.56E-05    | 0.000720887 |

|                    |             |             |             |             |             |             |
|--------------------|-------------|-------------|-------------|-------------|-------------|-------------|
| ENSMUSG00000040760 | 1899.521397 | 0.51031884  | 0.133785455 | 3.814456798 | 0.000136483 | 0.001199725 |
| ENSMUSG00000021759 | 505.3479299 | 0.510426595 | 0.201529473 | 2.532764007 | 0.011316711 | 0.047789051 |
| ENSMUSG00000021054 | 3329.158558 | 0.51060692  | 0.158898376 | 3.213418116 | 0.001311652 | 0.008293493 |
| ENSMUSG00000023367 | 3845.638243 | 0.511010292 | 0.09856959  | 5.184259099 | 2.17E-07    | 3.79E-06    |
| ENSMUSG00000037458 | 9070.471145 | 0.511049451 | 0.098054203 | 5.211907634 | 1.87E-07    | 3.31E-06    |
| ENSMUSG00000066538 | 165.8420245 | 0.51146084  | 0.240243167 | 2.12892981  | 0.033260068 | 0.111109309 |
| ENSMUSG00000105893 | 150.5746762 | 0.512463524 | 0.213642422 | 2.398697409 | 0.016453505 | 0.063869454 |
| ENSMUSG00000091705 | 4447.262228 | 0.512505447 | 0.150910951 | 3.396078573 | 0.000683587 | 0.00482274  |
| ENSMUSG00000022687 | 1721.703422 | 0.513445547 | 0.166887457 | 3.076597577 | 0.002093778 | 0.012220187 |
| ENSMUSG00000014075 | 262.0269903 | 0.51392321  | 0.177229114 | 2.899767419 | 0.003734396 | 0.019531139 |
| ENSMUSG00000073155 | 1553.409168 | 0.513969573 | 0.150317873 | 3.419217972 | 0.000628014 | 0.004488891 |
| ENSMUSG00000033060 | 18396.20044 | 0.514017651 | 0.115517989 | 4.449676241 | 8.60E-06    | 0.00010395  |
| ENSMUSG00000073982 | 1756.21334  | 0.514284948 | 0.114023796 | 4.51033001  | 6.47E-06    | 8.11E-05    |
| ENSMUSG00000046269 | 220.7848816 | 0.51432339  | 0.18850511  | 2.728432084 | 0.006363619 | 0.030167901 |
| ENSMUSG00000017453 | 1787.130426 | 0.515268542 | 0.155564429 | 3.312251675 | 0.000925482 | 0.006242948 |
| ENSMUSG00000004263 | 460.7716006 | 0.515402691 | 0.157747961 | 3.26725422  | 0.001085961 | 0.007131337 |
| ENSMUSG00000022010 | 10661.01733 | 0.515526789 | 0.103210731 | 4.994895233 | 5.89E-07    | 9.26E-06    |
| ENSMUSG00000063694 | 8311.775495 | 0.516203288 | 0.109917124 | 4.696295449 | 2.65E-06    | 3.64E-05    |
| ENSMUSG00000028184 | 6868.432097 | 0.516464768 | 0.108809629 | 4.746498762 | 2.07E-06    | 2.90E-05    |
| ENSMUSG00000022560 | 1524.852504 | 0.516581855 | 0.132127702 | 3.909716482 | 9.24E-05    | 0.000855423 |
| ENSMUSG00000040570 | 916.7713435 | 0.516661733 | 0.156458902 | 3.302220114 | 0.000959228 | 0.006418163 |
| ENSMUSG00000026159 | 4658.717464 | 0.51718751  | 0.116149571 | 4.452771605 | 8.48E-06    | 0.000102686 |
| ENSMUSG00000024339 | 1501.50957  | 0.517225296 | 0.174155342 | 2.969907729 | 0.002978892 | 0.016338483 |
| ENSMUSG00000051000 | 378.0577302 | 0.517408958 | 0.169506563 | 3.052442039 | 0.002269876 | 0.013066726 |
| ENSMUSG00000026154 | 424.5945889 | 0.517739591 | 0.14149742  | 3.659003759 | 0.000253198 | 0.002051802 |
| ENSMUSG00000069308 | 1043.464998 | 0.518201683 | 0.177416921 | 2.920813186 | 0.003491191 | 0.018524161 |
| ENSMUSG00000109841 | 194.9257588 | 0.518207026 | 0.222024084 | 2.334012673 | 0.019595058 | 0.073222084 |
| ENSMUSG00000022769 | 2127.06456  | 0.518327425 | 0.186350373 | 2.781467061 | 0.005411382 | 0.026470549 |
| ENSMUSG00000015944 | 387.5917414 | 0.518391299 | 0.2262041   | 2.291697187 | 0.021923123 | 0.080148781 |

|                    |             |             |             |             |             |             |
|--------------------|-------------|-------------|-------------|-------------|-------------|-------------|
| ENSMUSG00000052155 | 2215.838508 | 0.519063987 | 0.113579003 | 4.570069923 | 4.88E-06    | 6.31E-05    |
| ENSMUSG00000001630 | 1471.134125 | 0.519247253 | 0.174002488 | 2.98413695  | 0.002843795 | 0.015744653 |
| ENSMUSG00000030795 | 21278.2191  | 0.519785478 | 0.109818583 | 4.733128614 | 2.21E-06    | 3.08E-05    |
| ENSMUSG00000028563 | 551.5335486 | 0.520121713 | 0.169378598 | 3.070764072 | 0.002135118 | 0.012415975 |
| ENSMUSG00000044734 | 5639.543669 | 0.520371041 | 0.098844347 | 5.264550348 | 1.41E-07    | 2.56E-06    |
| ENSMUSG00000073147 | 2833.4712   | 0.520584241 | 0.160827433 | 3.236911946 | 0.001208307 | 0.007756607 |
| ENSMUSG00000073411 | 24405.07379 | 0.520868063 | 0.162521967 | 3.204908673 | 0.001351053 | 0.00849925  |
| ENSMUSG00000074733 | 2096.204502 | 0.521658365 | 0.133939066 | 3.89474393  | 9.83E-05    | 0.00090348  |
| ENSMUSG00000112237 | 279.1890622 | 0.52199082  | 0.182236331 | 2.864361984 | 0.004178502 | 0.021446438 |
| ENSMUSG00000022246 | 2655.71602  | 0.522403695 | 0.14038374  | 3.721255    | 0.000198235 | 0.001663847 |
| ENSMUSG00000047767 | 1651.696958 | 0.522524859 | 0.133244643 | 3.921544956 | 8.80E-05    | 0.000820623 |
| ENSMUSG00000024953 | 2786.012238 | 0.522548899 | 0.121923657 | 4.285869641 | 1.82E-05    | 0.000204502 |
| ENSMUSG00000060012 | 9500.420594 | 0.522735344 | 0.11957357  | 4.371662927 | 1.23E-05    | 0.000144044 |
| ENSMUSG00000024208 | 1762.223712 | 0.523098043 | 0.118620977 | 4.409827455 | 1.03E-05    | 0.000122588 |
| ENSMUSG00000041471 | 606.3078215 | 0.523285134 | 0.142947462 | 3.660681524 | 0.000251545 | 0.002040637 |
| ENSMUSG00000083863 | 148.1823191 | 0.523880615 | 0.250006474 | 2.095468195 | 0.036129393 | 0.118471047 |
| ENSMUSG00000031604 | 1916.813425 | 0.524284647 | 0.159553707 | 3.285944637 | 0.00101641  | 0.006734093 |
| ENSMUSG00000035235 | 181.9726523 | 0.524413473 | 0.200177083 | 2.619747797 | 0.008799482 | 0.039231756 |
| ENSMUSG00000004270 | 4587.401505 | 0.524584053 | 0.102655099 | 5.110160704 | 3.22E-07    | 5.41E-06    |
| ENSMUSG00000066800 | 4546.025177 | 0.524622592 | 0.105904998 | 4.953709457 | 7.28E-07    | 1.13E-05    |
| ENSMUSG00000024944 | 1196.997263 | 0.524952288 | 0.112946866 | 4.647780897 | 3.36E-06    | 4.48E-05    |
| ENSMUSG00000042228 | 3913.279141 | 0.526783777 | 0.128624006 | 4.095532339 | 4.21E-05    | 0.000429893 |
| ENSMUSG00000022912 | 317.2455356 | 0.52705972  | 0.196619811 | 2.68060333  | 0.007348957 | 0.033945546 |
| ENSMUSG00000026343 | 1553.795109 | 0.528071357 | 0.1162368   | 4.543065187 | 5.54E-06    | 7.04E-05    |
| ENSMUSG00000028967 | 5376.68507  | 0.528085653 | 0.151499919 | 3.485715748 | 0.000490822 | 0.003652261 |
| ENSMUSG00000051650 | 291.0035904 | 0.528248449 | 0.176083132 | 2.999994619 | 0.002699844 | 0.015097597 |
| ENSMUSG00000040714 | 122.6504979 | 0.528766939 | 0.264041326 | 2.002591593 | 0.045221143 | 0.14052698  |
| ENSMUSG00000041653 | 135.3866874 | 0.528804161 | 0.25749865  | 2.053619162 | 0.040012566 | 0.128096502 |
| ENSMUSG00000025432 | 1592.288022 | 0.529957628 | 0.177918618 | 2.97865189  | 0.002895195 | 0.015973712 |

|                    |             |             |             |             |             |             |
|--------------------|-------------|-------------|-------------|-------------|-------------|-------------|
| ENSMUSG00000061232 | 31588.9234  | 0.530178213 | 0.162909851 | 3.254426979 | 0.001136214 | 0.007383071 |
| ENSMUSG00000102302 | 279.4998457 | 0.530326019 | 0.162696278 | 3.259607572 | 0.001115665 | 0.0072835   |
| ENSMUSG00000103146 | 163.061848  | 0.530467931 | 0.261102132 | 2.031649177 | 0.042189184 | 0.133172116 |
| ENSMUSG00000062526 | 994.418082  | 0.530513146 | 0.133583825 | 3.9713876   | 7.15E-05    | 0.000686567 |
| ENSMUSG00000038119 | 1575.663949 | 0.531264612 | 0.137253622 | 3.870678267 | 0.000108533 | 0.0009847   |
| ENSMUSG00000040690 | 364.6092316 | 0.531536632 | 0.205281002 | 2.589312348 | 0.009616782 | 0.042093004 |
| ENSMUSG00000027132 | 597.0580376 | 0.531687671 | 0.164318178 | 3.235720352 | 0.001213362 | 0.007777863 |
| ENSMUSG00000078919 | 540.8403099 | 0.532087808 | 0.151803271 | 3.50511424  | 0.000456411 | 0.00342939  |
| ENSMUSG00000015837 | 9143.702553 | 0.532135854 | 0.168473985 | 3.158563945 | 0.001585485 | 0.009729748 |
| ENSMUSG00000098557 | 6809.862606 | 0.532598973 | 0.154524134 | 3.446704152 | 0.00056747  | 0.004118171 |
| ENSMUSG00000040322 | 1355.656842 | 0.532884578 | 0.147044671 | 3.623963894 | 0.000290122 | 0.002319001 |
| ENSMUSG00000114169 | 293.4762382 | 0.532970794 | 0.175627749 | 3.034661647 | 0.002408057 | 0.013710001 |
| ENSMUSG00000111375 | 514.0619963 | 0.533089696 | 0.178008144 | 2.994748908 | 0.002746708 | 0.015315069 |
| ENSMUSG00000034591 | 379.6209685 | 0.533464872 | 0.189378742 | 2.816920559 | 0.004848652 | 0.024228049 |
| ENSMUSG00000026131 | 7286.253583 | 0.533843587 | 0.156891092 | 3.402637967 | 0.000667386 | 0.004730892 |
| ENSMUSG00000077734 | 138.2392806 | 0.534366818 | 0.230938587 | 2.313891428 | 0.020673678 | 0.076542844 |
| ENSMUSG00000056260 | 724.1675087 | 0.534483841 | 0.150644376 | 3.547984045 | 0.000388192 | 0.002983137 |
| ENSMUSG00000038910 | 5464.772541 | 0.535070191 | 0.106014805 | 5.047127049 | 4.49E-07    | 7.31E-06    |
| ENSMUSG00000025937 | 1376.556071 | 0.535197578 | 0.114289287 | 4.682832406 | 2.83E-06    | 3.85E-05    |
| ENSMUSG00000047866 | 6218.378396 | 0.535866132 | 0.106604823 | 5.026659344 | 4.99E-07    | 8.02E-06    |
| ENSMUSG00000040774 | 2244.014018 | 0.535964987 | 0.111574326 | 4.80365873  | 1.56E-06    | 2.25E-05    |
| ENSMUSG00000024480 | 1480.810039 | 0.536658092 | 0.106396985 | 5.043922001 | 4.56E-07    | 7.41E-06    |
| ENSMUSG00000044894 | 11253.33857 | 0.53705347  | 0.096120328 | 5.587303743 | 2.31E-08    | 4.83E-07    |
| ENSMUSG00000034297 | 12180.44152 | 0.538116727 | 0.106677659 | 5.044324491 | 4.55E-07    | 7.40E-06    |
| ENSMUSG00000064061 | 1166.145312 | 0.538837893 | 0.161080675 | 3.345143004 | 0.000822402 | 0.005639722 |
| ENSMUSG00000032757 | 900.5523006 | 0.540247719 | 0.123848    | 4.36218364  | 1.29E-05    | 0.000149959 |
| ENSMUSG00000036073 | 1963.103639 | 0.540457745 | 0.136056573 | 3.972301605 | 7.12E-05    | 0.000684232 |
| ENSMUSG00000032870 | 2912.784199 | 0.540898695 | 0.14858835  | 3.640249692 | 0.000272374 | 0.002191908 |
| ENSMUSG00000057666 | 44127.97209 | 0.541901193 | 0.134823926 | 4.019325112 | 5.84E-05    | 0.000573759 |

|                    |             |             |             |             |             |             |
|--------------------|-------------|-------------|-------------|-------------|-------------|-------------|
| ENSMUSG00000001943 | 345.8742325 | 0.542164432 | 0.176792575 | 3.066669693 | 0.002164579 | 0.012564362 |
| ENSMUSG00000027900 | 2272.961862 | 0.543568178 | 0.112829159 | 4.817621455 | 1.45E-06    | 2.11E-05    |
| ENSMUSG00000028786 | 3661.494704 | 0.544157582 | 0.139279374 | 3.906950233 | 9.35E-05    | 0.000864195 |
| ENSMUSG00000062937 | 1758.211595 | 0.545100093 | 0.141828243 | 3.843381828 | 0.00012135  | 0.001082495 |
| ENSMUSG00000024193 | 987.528399  | 0.546584909 | 0.13865053  | 3.942176849 | 8.07E-05    | 0.00076301  |
| ENSMUSG00000024924 | 402.0118178 | 0.546614593 | 0.242439516 | 2.254643146 | 0.024155737 | 0.086635106 |
| ENSMUSG00000020647 | 5986.552208 | 0.546978015 | 0.135051543 | 4.050142657 | 5.12E-05    | 0.000511887 |
| ENSMUSG00000032386 | 1373.751719 | 0.54716622  | 0.110660285 | 4.944558189 | 7.63E-07    | 1.18E-05    |
| ENSMUSG00000027639 | 4502.743341 | 0.547358342 | 0.094931878 | 5.765801297 | 8.13E-09    | 1.84E-07    |
| ENSMUSG00000006930 | 1273.021128 | 0.547365162 | 0.145235088 | 3.768821774 | 0.00016402  | 0.001405768 |
| ENSMUSG00000103094 | 239.4400052 | 0.54768268  | 0.180293307 | 3.037731629 | 0.002383661 | 0.013602362 |
| ENSMUSG00000028976 | 712.6065743 | 0.548276529 | 0.243301738 | 2.253483817 | 0.02422866  | 0.086828856 |
| ENSMUSG00000022119 | 11270.13934 | 0.548484329 | 0.118357316 | 4.634139631 | 3.58E-06    | 4.76E-05    |
| ENSMUSG00000059493 | 2453.583135 | 0.548685359 | 0.124660993 | 4.401419788 | 1.08E-05    | 0.000127032 |
| ENSMUSG00000113536 | 83.69005669 | 0.549382992 | 0.278936009 | 1.969566405 | 0.048888085 | 0.148799398 |
| ENSMUSG00000033543 | 2091.976564 | 0.549945044 | 0.137753999 | 3.992225615 | 6.55E-05    | 0.000636883 |
| ENSMUSG00000083567 | 164.9428796 | 0.55029313  | 0.228505848 | 2.408223405 | 0.016030368 | 0.062687957 |
| ENSMUSG00000006717 | 1699.60739  | 0.550619442 | 0.123183125 | 4.469925902 | 7.82E-06    | 9.58E-05    |
| ENSMUSG00000071451 | 691.5797611 | 0.551432247 | 0.142929031 | 3.858084267 | 0.000114279 | 0.001028467 |
| ENSMUSG00000106734 | 861.967243  | 0.551917566 | 0.230046797 | 2.399153442 | 0.016433027 | 0.063843122 |
| ENSMUSG00000032370 | 492.9088745 | 0.552625659 | 0.177186599 | 3.118890833 | 0.001815332 | 0.010871031 |
| ENSMUSG00000035692 | 179.6648882 | 0.552729512 | 0.270409637 | 2.044045171 | 0.040949085 | 0.130364817 |
| ENSMUSG00000039197 | 4916.196329 | 0.553299161 | 0.110420914 | 5.010818498 | 5.42E-07    | 8.60E-06    |
| ENSMUSG00000103780 | 209.4400958 | 0.553409516 | 0.215548483 | 2.567447979 | 0.010245016 | 0.044217941 |
| ENSMUSG00000098132 | 1157.398985 | 0.554455311 | 0.139110378 | 3.985722112 | 6.73E-05    | 0.000652874 |
| ENSMUSG00000107000 | 253.2272619 | 0.554485027 | 0.175720835 | 3.155488241 | 0.001602297 | 0.009815647 |
| ENSMUSG00000031712 | 438.5549438 | 0.554827673 | 0.14325931  | 3.87289085  | 0.000107552 | 0.000977391 |
| ENSMUSG00000109245 | 204.4763167 | 0.555480919 | 0.236490216 | 2.348853699 | 0.018831304 | 0.071070726 |
| ENSMUSG00000101013 | 504.2851725 | 0.556019832 | 0.145511401 | 3.821142738 | 0.000132835 | 0.001171351 |



|                    |             |             |             |             |             |             |
|--------------------|-------------|-------------|-------------|-------------|-------------|-------------|
| ENSMUSG00000029638 | 934.7569173 | 0.556031544 | 0.152121467 | 3.655181322 | 0.000257    | 0.002077333 |
| ENSMUSG00000064341 | 221673.7909 | 0.556364671 | 0.148497802 | 3.746618906 | 0.000179234 | 0.001520966 |
| ENSMUSG00000035356 | 12975.00866 | 0.556812181 | 0.143858663 | 3.870550219 | 0.00010859  | 0.000984817 |
| ENSMUSG00000022377 | 1211.991294 | 0.557049233 | 0.149857261 | 3.717198823 | 0.000201444 | 0.001689301 |
| ENSMUSG00000040483 | 260.2158677 | 0.557250681 | 0.194874589 | 2.859534867 | 0.004242628 | 0.02168573  |
| ENSMUSG00000031605 | 1721.461955 | 0.557360651 | 0.123545676 | 4.511373191 | 6.44E-06    | 8.08E-05    |
| ENSMUSG00000020654 | 155.3091801 | 0.557627427 | 0.257126049 | 2.168692867 | 0.030106009 | 0.102581224 |
| ENSMUSG00000021464 | 2239.085064 | 0.557702958 | 0.134544384 | 4.145122528 | 3.40E-05    | 0.000353932 |
| ENSMUSG00000061130 | 6752.965615 | 0.557862289 | 0.099058769 | 5.631629545 | 1.79E-08    | 3.81E-07    |
| ENSMUSG00000025171 | 365.8798438 | 0.557929835 | 0.162225199 | 3.439230401 | 0.000583371 | 0.004225315 |
| ENSMUSG00000026977 | 6108.08804  | 0.558164658 | 0.099212682 | 5.625940624 | 1.84E-08    | 3.93E-07    |
| ENSMUSG00000105378 | 99.93309852 | 0.55826582  | 0.245394002 | 2.27497744  | 0.022907283 | 0.083015887 |
| ENSMUSG00000028195 | 8224.973993 | 0.558345103 | 0.201796595 | 2.766870784 | 0.005659718 | 0.02743856  |
| ENSMUSG00000021738 | 3909.193199 | 0.558509117 | 0.101827173 | 5.484873046 | 4.14E-08    | 8.29E-07    |
| ENSMUSG00000029094 | 1886.33886  | 0.558726808 | 0.147486285 | 3.788330606 | 0.000151663 | 0.001312813 |
| ENSMUSG00000029622 | 13404.52777 | 0.559274938 | 0.136347202 | 4.101843885 | 4.10E-05    | 0.000418714 |
| ENSMUSG00000034480 | 3302.305931 | 0.5592882   | 0.126900693 | 4.407290361 | 1.05E-05    | 0.000123901 |
| ENSMUSG00000030556 | 1297.719624 | 0.559330529 | 0.205543846 | 2.72122246  | 0.006504098 | 0.030706722 |
| ENSMUSG00000110170 | 375.2539517 | 0.559717561 | 0.164443075 | 3.403716207 | 0.000664758 | 0.004719759 |
| ENSMUSG00000024862 | 1598.830309 | 0.560059664 | 0.131256237 | 4.266918475 | 1.98E-05    | 0.000219785 |
| ENSMUSG00000068758 | 276.5288813 | 0.560399914 | 0.230035458 | 2.436145798 | 0.0148447   | 0.059116366 |
| ENSMUSG00000034160 | 22860.8721  | 0.56053075  | 0.126956057 | 4.415155633 | 1.01E-05    | 0.000120054 |
| ENSMUSG00000097729 | 258.7103477 | 0.560566529 | 0.200650547 | 2.793745327 | 0.005210149 | 0.025689042 |
| ENSMUSG00000079038 | 284.9452283 | 0.56088251  | 0.204284342 | 2.74559716  | 0.006040088 | 0.028874598 |
| ENSMUSG00000063383 | 192.8266141 | 0.561491768 | 0.199361709 | 2.816447407 | 0.004855799 | 0.024254716 |
| ENSMUSG00000033392 | 4618.04824  | 0.561654479 | 0.120989091 | 4.642191097 | 3.45E-06    | 4.58E-05    |
| ENSMUSG00000020733 | 9594.56922  | 0.561690395 | 0.11554916  | 4.861051291 | 1.17E-06    | 1.73E-05    |
| ENSMUSG00000031209 | 4699.267191 | 0.562634099 | 0.110923361 | 5.072277758 | 3.93E-07    | 6.46E-06    |
| ENSMUSG00000037820 | 21622.5888  | 0.563097124 | 0.101997368 | 5.520702515 | 3.38E-08    | 6.83E-07    |

|                    |             |             |             |             |             |             |
|--------------------|-------------|-------------|-------------|-------------|-------------|-------------|
| ENSMUSG00000005534 | 9918.668039 | 0.563240417 | 0.123782351 | 4.550248171 | 5.36E-06    | 6.85E-05    |
| ENSMUSG00000088108 | 203.4335234 | 0.563645981 | 0.192330467 | 2.930612031 | 0.00338295  | 0.018097612 |
| ENSMUSG00000045464 | 145.5940853 | 0.56425671  | 0.219391419 | 2.571917859 | 0.010113688 | 0.043744253 |
| ENSMUSG00000098274 | 115.2002068 | 0.564389073 | 0.243490387 | 2.317911106 | 0.020454153 | 0.075809882 |
| ENSMUSG00000040928 | 1284.640792 | 0.564501987 | 0.133969685 | 4.213654664 | 2.51E-05    | 0.000270314 |
| ENSMUSG00000020590 | 2684.070913 | 0.564619795 | 0.119248163 | 4.734830119 | 2.19E-06    | 3.06E-05    |
| ENSMUSG00000022906 | 2461.538849 | 0.564901312 | 0.151171794 | 3.736816884 | 0.000186365 | 0.00157369  |
| ENSMUSG00000025759 | 391.1450911 | 0.565189626 | 0.164953592 | 3.426355368 | 0.000611739 | 0.004393688 |
| ENSMUSG00000029338 | 1409.937673 | 0.565310447 | 0.132774292 | 4.25767999  | 2.07E-05    | 0.000227818 |
| ENSMUSG00000027660 | 3127.226733 | 0.56534951  | 0.18539855  | 3.049373962 | 0.002293188 | 0.013173723 |
| ENSMUSG00000037960 | 462.2629682 | 0.565487323 | 0.151483229 | 3.733002826 | 0.00018921  | 0.001595305 |
| ENSMUSG00000064368 | 13780.34875 | 0.565724367 | 0.168368428 | 3.360038305 | 0.000779317 | 0.005370896 |
| ENSMUSG00000079659 | 790.1392604 | 0.565839928 | 0.141670996 | 3.994042137 | 6.50E-05    | 0.000632849 |
| ENSMUSG00000059743 | 344.9353479 | 0.566130222 | 0.197346889 | 2.868706092 | 0.004121546 | 0.021202905 |
| ENSMUSG00000031367 | 106.4159537 | 0.566778489 | 0.248744473 | 2.278557117 | 0.022693406 | 0.082370709 |
| ENSMUSG00000027312 | 4424.561641 | 0.567536217 | 0.124673487 | 4.552180493 | 5.31E-06    | 6.80E-05    |
| ENSMUSG00000040652 | 1286.723197 | 0.567563972 | 0.140028361 | 4.053207287 | 5.05E-05    | 0.000506278 |
| ENSMUSG00000030168 | 8431.045769 | 0.567996782 | 0.135289015 | 4.198395433 | 2.69E-05    | 0.00028697  |
| ENSMUSG00000031485 | 5637.029859 | 0.56830298  | 0.105014642 | 5.411654666 | 6.24E-08    | 1.22E-06    |
| ENSMUSG00000035105 | 180.0457262 | 0.56852639  | 0.233701445 | 2.432703781 | 0.014986556 | 0.059521849 |
| ENSMUSG00000021025 | 13980.41798 | 0.568686873 | 0.160147823 | 3.55101221  | 0.000383753 | 0.002952076 |
| ENSMUSG00000084799 | 430.389831  | 0.568880763 | 0.17595134  | 3.233170951 | 0.001224243 | 0.007836349 |
| ENSMUSG00000073643 | 933.3695385 | 0.569039522 | 0.163135153 | 3.488147789 | 0.000486379 | 0.003621617 |
| ENSMUSG00000039405 | 1122.600991 | 0.569515654 | 0.201640965 | 2.824404519 | 0.004736856 | 0.023754582 |
| ENSMUSG00000049580 | 322.1044888 | 0.569692586 | 0.1959197   | 2.907786137 | 0.003639972 | 0.019131513 |
| ENSMUSG00000038375 | 1608.018048 | 0.569721409 | 0.145137364 | 3.925394503 | 8.66E-05    | 0.000810219 |
| ENSMUSG00000106287 | 140.8163781 | 0.56997294  | 0.23269171  | 2.449476776 | 0.014306394 | 0.057475569 |
| ENSMUSG00000021069 | 573.3451718 | 0.569986171 | 0.22893669  | 2.489710897 | 0.012784704 | 0.052458453 |
| ENSMUSG00000052392 | 487.8387074 | 0.57078152  | 0.148821123 | 3.83535287  | 0.000125384 | 0.001116244 |

|                     |             |             |             |             |             |             |
|---------------------|-------------|-------------|-------------|-------------|-------------|-------------|
| ENSMUSG00000089726  | 1192.826849 | 0.570949102 | 0.151770513 | 3.761923775 | 0.000168611 | 0.001441796 |
| ENSMUSG00000064853  | 183.6471008 | 0.571000329 | 0.208032087 | 2.744770476 | 0.006055323 | 0.028928827 |
| ENSMUSG00000030615  | 1094.064841 | 0.571282267 | 0.1478615   | 3.863630945 | 0.000111714 | 0.001008637 |
| ENSMUSG00000061778  | 1029.910341 | 0.571350451 | 0.133189571 | 4.289753686 | 1.79E-05    | 0.000201669 |
| ENSMUSG00000027761  | 3318.935785 | 0.57135985  | 0.195903138 | 2.916542614 | 0.003539344 | 0.018739531 |
| ENSMUSG00000070576  | 89.70843449 | 0.571825414 | 0.284976674 | 2.006569188 | 0.044795555 | 0.139464703 |
| ENSMUSG00000024750  | 13243.08691 | 0.572123994 | 0.159993265 | 3.575925496 | 0.000348991 | 0.002718424 |
| ENSMUSG00000025212  | 638.676485  | 0.573241952 | 0.199532866 | 2.872919952 | 0.004066972 | 0.02096568  |
| ENSMUSG00000052241  | 84.99053821 | 0.573971286 | 0.287026933 | 1.999712293 | 0.04553134  | 0.141144622 |
| ENSMUSG00000031357  | 1976.505946 | 0.574461591 | 0.111468702 | 5.153568496 | 2.56E-07    | 4.39E-06    |
| ENSMUSG00000028413  | 5377.567515 | 0.574662395 | 0.098202008 | 5.851839555 | 4.86E-09    | 1.14E-07    |
| ENSMUSG00000015882  | 3955.305867 | 0.575029819 | 0.109116605 | 5.269865391 | 1.37E-07    | 2.49E-06    |
| ENSMUSG00000017830  | 374.8111244 | 0.575553633 | 0.205403767 | 2.802059773 | 0.005077746 | 0.025158592 |
| ENSMUSG00000027346  | 1641.802425 | 0.576360555 | 0.15936497  | 3.616607566 | 0.000298489 | 0.002380762 |
| ENSMUSG000000102419 | 114.6540914 | 0.576839353 | 0.249629309 | 2.310783763 | 0.020844802 | 0.07700181  |
| ENSMUSG000000109363 | 138.4690486 | 0.577158258 | 0.228803286 | 2.522508606 | 0.01165211  | 0.048798817 |
| ENSMUSG00000030747  | 1772.365687 | 0.57726063  | 0.157378227 | 3.667982808 | 0.000244472 | 0.001994134 |
| ENSMUSG00000059714  | 1925.763507 | 0.577741368 | 0.166276639 | 3.474579298 | 0.000511655 | 0.003783296 |
| ENSMUSG00000001467  | 4011.746004 | 0.577825573 | 0.140201765 | 4.121385869 | 3.77E-05    | 0.000388533 |
| ENSMUSG00000064262  | 92.3871336  | 0.577903964 | 0.273523673 | 2.112811506 | 0.034616904 | 0.114519609 |
| ENSMUSG00000097497  | 114.5327552 | 0.578025004 | 0.273971104 | 2.109802804 | 0.034875345 | 0.115154733 |
| ENSMUSG000000100455 | 348.588754  | 0.578493195 | 0.16061489  | 3.601740744 | 0.000316094 | 0.002495974 |
| ENSMUSG00000064210  | 12327.64189 | 0.578704602 | 0.114226911 | 5.066271992 | 4.06E-07    | 6.64E-06    |
| ENSMUSG00000044906  | 428.4466905 | 0.57904649  | 0.184838437 | 3.132716872 | 0.001731964 | 0.010456852 |
| ENSMUSG00000028266  | 2171.649166 | 0.579740497 | 0.108594755 | 5.338568127 | 9.37E-08    | 1.77E-06    |
| ENSMUSG00000025529  | 643.0721292 | 0.58021429  | 0.135292064 | 4.2886055   | 1.80E-05    | 0.000202407 |
| ENSMUSG00000059540  | 227.3109698 | 0.580966337 | 0.217814319 | 2.667255027 | 0.007647362 | 0.035055255 |
| ENSMUSG00000052748  | 2007.562205 | 0.580999212 | 0.111753081 | 5.198954749 | 2.00E-07    | 3.53E-06    |
| ENSMUSG00000039531  | 1862.74684  | 0.581103367 | 0.133004231 | 4.369059264 | 1.25E-05    | 0.000145543 |

|                    |             |             |             |             |             |             |
|--------------------|-------------|-------------|-------------|-------------|-------------|-------------|
| ENSMUSG00000067847 | 1359.386295 | 0.581586432 | 0.125227895 | 4.644224278 | 3.41E-06    | 4.54E-05    |
| ENSMUSG00000037818 | 368.4487961 | 0.58178543  | 0.171562536 | 3.391098341 | 0.000696131 | 0.004896495 |
| ENSMUSG00000107884 | 169.3600412 | 0.582375435 | 0.204542944 | 2.847203736 | 0.004410513 | 0.022364448 |
| ENSMUSG00000019979 | 5496.594054 | 0.582850605 | 0.132042226 | 4.414122816 | 1.01E-05    | 0.000120435 |
| ENSMUSG00000092341 | 264377.3019 | 0.583278101 | 0.122145328 | 4.77527967  | 1.79E-06    | 2.56E-05    |
| ENSMUSG00000029119 | 2026.800037 | 0.584068694 | 0.138163806 | 4.227363963 | 2.36E-05    | 0.000256218 |
| ENSMUSG00000028035 | 1805.574732 | 0.584148218 | 0.128499551 | 4.54591643  | 5.47E-06    | 6.95E-05    |
| ENSMUSG00000039616 | 352.6023863 | 0.584601174 | 0.200653899 | 2.913480263 | 0.003574244 | 0.018866088 |
| ENSMUSG00000028744 | 541.5913969 | 0.585283734 | 0.151965085 | 3.851435564 | 0.000117427 | 0.001052129 |
| ENSMUSG00000036885 | 12366.50513 | 0.585604163 | 0.126170349 | 4.641377041 | 3.46E-06    | 4.60E-05    |
| ENSMUSG00000094936 | 466.6935409 | 0.585657818 | 0.156636967 | 3.738950192 | 0.00018479  | 0.001560988 |
| ENSMUSG00000030691 | 6100.242634 | 0.586083263 | 0.136071731 | 4.307164014 | 1.65E-05    | 0.000187766 |
| ENSMUSG00000027978 | 1117.079091 | 0.586149652 | 0.145264247 | 4.035057928 | 5.46E-05    | 0.0005401   |
| ENSMUSG00000039831 | 1057.631795 | 0.586252474 | 0.1369444   | 4.2809525   | 1.86E-05    | 0.000208025 |
| ENSMUSG00000040414 | 3785.095765 | 0.586594613 | 0.137992616 | 4.25091306  | 2.13E-05    | 0.000233887 |
| ENSMUSG00000107992 | 1719.871752 | 0.587653928 | 0.168984961 | 3.477551647 | 0.000506016 | 0.003749054 |
| ENSMUSG00000085421 | 147.8956127 | 0.588103665 | 0.208735491 | 2.817458892 | 0.004840531 | 0.024203741 |
| ENSMUSG00000028397 | 2697.261802 | 0.588866603 | 0.128342909 | 4.588228568 | 4.47E-06    | 5.85E-05    |
| ENSMUSG00000054385 | 193.345491  | 0.589784477 | 0.263825705 | 2.235508011 | 0.025384016 | 0.090098512 |
| ENSMUSG00000032515 | 1066.460556 | 0.590395407 | 0.210603922 | 2.803344785 | 0.005057557 | 0.025069699 |
| ENSMUSG00000001225 | 2537.670921 | 0.590541008 | 0.179045618 | 3.298271216 | 0.000972821 | 0.006493531 |
| ENSMUSG00000033055 | 3130.638768 | 0.591173518 | 0.106150205 | 5.569216935 | 2.56E-08    | 5.29E-07    |
| ENSMUSG00000106596 | 102.2502336 | 0.591228016 | 0.283128279 | 2.088198388 | 0.036779943 | 0.119969212 |
| ENSMUSG00000003062 | 1634.559556 | 0.592503458 | 0.131377155 | 4.509942842 | 6.48E-06    | 8.12E-05    |
| ENSMUSG00000015652 | 411.0395617 | 0.593001663 | 0.204523575 | 2.899429388 | 0.003738425 | 0.019543044 |
| ENSMUSG00000043542 | 313.5638632 | 0.593821636 | 0.172777659 | 3.436912154 | 0.000588386 | 0.004256854 |
| ENSMUSG00000089371 | 851.5291325 | 0.593906854 | 0.197956245 | 3.000192563 | 0.00269809  | 0.015095262 |
| ENSMUSG00000112880 | 75.57671029 | 0.5941684   | 0.300422944 | 1.977773044 | 0.047954316 | 0.146557379 |
| ENSMUSG00000026611 | 89.20899463 | 0.594916408 | 0.299694879 | 1.985073654 | 0.047136278 | 0.144811424 |

|                    |             |             |             |             |             |             |
|--------------------|-------------|-------------|-------------|-------------|-------------|-------------|
| ENSMUSG00000061143 | 2557.196672 | 0.595834878 | 0.133351757 | 4.468144182 | 7.89E-06    | 9.65E-05    |
| ENSMUSG00000028080 | 24446.62166 | 0.59720726  | 0.117165185 | 5.097139205 | 3.45E-07    | 5.75E-06    |
| ENSMUSG00000051811 | 289.6781595 | 0.597240058 | 0.184560846 | 3.23600628  | 0.001212147 | 0.007774545 |
| ENSMUSG00000047554 | 1776.256441 | 0.597543506 | 0.109143884 | 5.474823541 | 4.38E-08    | 8.72E-07    |
| ENSMUSG00000032596 | 2975.211192 | 0.59819806  | 0.127621949 | 4.687266314 | 2.77E-06    | 3.79E-05    |
| ENSMUSG00000073077 | 682.5346487 | 0.598593169 | 0.172385091 | 3.472418451 | 0.000515792 | 0.003808831 |
| ENSMUSG00000091831 | 95.7697386  | 0.598607813 | 0.279105735 | 2.144734904 | 0.031974049 | 0.107760806 |
| ENSMUSG00000090150 | 2098.031684 | 0.598723291 | 0.164631595 | 3.636745975 | 0.000276104 | 0.002216485 |
| ENSMUSG00000065147 | 276.9168893 | 0.599622917 | 0.228223528 | 2.627349263 | 0.008605296 | 0.038550965 |
| ENSMUSG00000106364 | 85.38571406 | 0.600006974 | 0.302772431 | 1.981709406 | 0.047511774 | 0.14570408  |
| ENSMUSG00000066150 | 3921.017893 | 0.600092105 | 0.12689835  | 4.728919672 | 2.26E-06    | 3.14E-05    |
| ENSMUSG00000039934 | 71.19172994 | 0.600834194 | 0.303543063 | 1.979403474 | 0.047770598 | 0.14623639  |
| ENSMUSG00000030695 | 15083.47026 | 0.601139687 | 0.138693392 | 4.334306606 | 1.46E-05    | 0.000168433 |
| ENSMUSG00000025981 | 1417.046503 | 0.601228839 | 0.142947129 | 4.20595253  | 2.60E-05    | 0.000278345 |
| ENSMUSG00000097885 | 547.7858959 | 0.601502279 | 0.227659842 | 2.642109705 | 0.008239136 | 0.037226249 |
| ENSMUSG00000027981 | 1694.571049 | 0.602829329 | 0.131603261 | 4.580656487 | 4.64E-06    | 6.03E-05    |
| ENSMUSG00000033618 | 2446.197925 | 0.602929604 | 0.174490233 | 3.455377371 | 0.000549523 | 0.004008804 |
| ENSMUSG00000022587 | 4317.224659 | 0.603037592 | 0.178199772 | 3.384053661 | 0.00071424  | 0.004999459 |
| ENSMUSG00000015533 | 5852.749401 | 0.603497308 | 0.143273318 | 4.212210026 | 2.53E-05    | 0.000271918 |
| ENSMUSG00000036611 | 1026.794506 | 0.60415595  | 0.177128826 | 3.410827943 | 0.000647659 | 0.004611575 |
| ENSMUSG00000030341 | 3540.9925   | 0.604481701 | 0.131454906 | 4.598395919 | 4.26E-06    | 5.60E-05    |
| ENSMUSG00000056121 | 1234.07736  | 0.604762691 | 0.121976117 | 4.958041857 | 7.12E-07    | 1.11E-05    |
| ENSMUSG00000043252 | 1009.505339 | 0.605685225 | 0.132931391 | 4.556374676 | 5.20E-06    | 6.69E-05    |
| ENSMUSG00000082956 | 973.5940838 | 0.606361654 | 0.164427306 | 3.687718728 | 0.000226274 | 0.00186686  |
| ENSMUSG00000023947 | 343.0510478 | 0.606632961 | 0.208562786 | 2.908634728 | 0.003630107 | 0.019093165 |
| ENSMUSG00000044350 | 690.5694546 | 0.607188118 | 0.195175949 | 3.110978174 | 0.001864687 | 0.011118782 |
| ENSMUSG00000053291 | 209.2227744 | 0.607946285 | 0.187254482 | 3.246631415 | 0.001167795 | 0.007546509 |
| ENSMUSG00000030720 | 1082.28923  | 0.608283456 | 0.140464203 | 4.330522958 | 1.49E-05    | 0.000171088 |
| ENSMUSG00000024847 | 1071.6542   | 0.610314556 | 0.133918756 | 4.557349344 | 5.18E-06    | 6.67E-05    |

|                    |             |             |             |             |             |             |
|--------------------|-------------|-------------|-------------|-------------|-------------|-------------|
| ENSMUSG00000059895 | 985.2714803 | 0.611309379 | 0.13040385  | 4.687816954 | 2.76E-06    | 3.78E-05    |
| ENSMUSG00000028341 | 1171.447784 | 0.611753005 | 0.22002956  | 2.780321908 | 0.005430504 | 0.026540798 |
| ENSMUSG00000030987 | 3776.106865 | 0.614525581 | 0.120929783 | 5.081672726 | 3.74E-07    | 6.18E-06    |
| ENSMUSG00000018736 | 2675.41397  | 0.615070152 | 0.149382643 | 4.117413763 | 3.83E-05    | 0.000394487 |
| ENSMUSG00000033278 | 2837.004728 | 0.615219348 | 0.158125391 | 3.89070563  | 1.00E-04    | 0.000916929 |
| ENSMUSG00000056917 | 715.4135119 | 0.615797702 | 0.146362844 | 4.20733628  | 2.58E-05    | 0.000277179 |
| ENSMUSG00000026623 | 5196.913237 | 0.616554431 | 0.116868768 | 5.275613337 | 1.32E-07    | 2.42E-06    |
| ENSMUSG00000024558 | 198.7592554 | 0.616698353 | 0.246299439 | 2.503856099 | 0.012284799 | 0.05082807  |
| ENSMUSG00000028657 | 3850.662842 | 0.617089571 | 0.128818587 | 4.790376808 | 1.66E-06    | 2.40E-05    |
| ENSMUSG00000048581 | 148.6006719 | 0.617566818 | 0.237398129 | 2.60139716  | 0.00928449  | 0.04091156  |
| ENSMUSG00000103783 | 70.99637783 | 0.618224365 | 0.314458457 | 1.965996946 | 0.049298963 | 0.149600787 |
| ENSMUSG00000024952 | 1783.716637 | 0.618341901 | 0.127578293 | 4.84676419  | 1.25E-06    | 1.85E-05    |
| ENSMUSG00000105827 | 5602.678004 | 0.61852434  | 0.145755802 | 4.243565819 | 2.20E-05    | 0.000240462 |
| ENSMUSG00000056938 | 1771.205802 | 0.618532748 | 0.15978164  | 3.871112772 | 0.00010834  | 0.000983347 |
| ENSMUSG00000038074 | 143.9146333 | 0.61892773  | 0.21445918  | 2.885993178 | 0.003901806 | 0.020237789 |
| ENSMUSG00000090031 | 249.4566461 | 0.619351786 | 0.17396252  | 3.560259908 | 0.000370488 | 0.002868837 |
| ENSMUSG00000104436 | 118.090671  | 0.619410499 | 0.257501985 | 2.405459124 | 0.016152159 | 0.063050813 |
| ENSMUSG00000032066 | 882.1850295 | 0.619781514 | 0.206139812 | 3.006607549 | 0.002641806 | 0.014843767 |
| ENSMUSG00000030934 | 99034.57211 | 0.621291224 | 0.188474151 | 3.296426699 | 0.000979232 | 0.006532409 |
| ENSMUSG00000087557 | 89.61473144 | 0.622010719 | 0.287497142 | 2.163537053 | 0.030499897 | 0.103631347 |
| ENSMUSG00000000440 | 534.987696  | 0.622206711 | 0.169669756 | 3.667163351 | 0.000245256 | 0.001998487 |
| ENSMUSG00000037270 | 17894.98486 | 0.622541918 | 0.130854253 | 4.757521463 | 1.96E-06    | 2.77E-05    |
| ENSMUSG00000097320 | 310.6353211 | 0.62261382  | 0.157095929 | 3.963271516 | 7.39E-05    | 0.000707295 |
| ENSMUSG00000065353 | 798.7389462 | 0.62273842  | 0.187986748 | 3.312671907 | 0.000924093 | 0.006237121 |
| ENSMUSG00000022971 | 622.3076769 | 0.622818609 | 0.15506332  | 4.016543755 | 5.91E-05    | 0.000579688 |
| ENSMUSG00000058492 | 65.20079803 | 0.622829807 | 0.304595322 | 2.044777982 | 0.040876751 | 0.130153117 |
| ENSMUSG00000097385 | 109.1047694 | 0.622905062 | 0.257205433 | 2.421819228 | 0.015443031 | 0.060944085 |
| ENSMUSG00000064138 | 2431.136873 | 0.623264724 | 0.104741993 | 5.950476082 | 2.67E-09    | 6.55E-08    |
| ENSMUSG00000059326 | 1479.054159 | 0.623377725 | 0.127152472 | 4.902600131 | 9.46E-07    | 1.43E-05    |

|                     |             |             |             |             |             |             |
|---------------------|-------------|-------------|-------------|-------------|-------------|-------------|
| ENSMUSG00000070327  | 31633.50239 | 0.623400951 | 0.132980361 | 4.687917418 | 2.76E-06    | 3.78E-05    |
| ENSMUSG00000000915  | 10755.72945 | 0.624358133 | 0.101734349 | 6.137141849 | 8.40E-10    | 2.22E-08    |
| ENSMUSG00000032285  | 365.590804  | 0.625241663 | 0.229953549 | 2.718991141 | 0.006548136 | 0.030879675 |
| ENSMUSG00000056536  | 3636.218747 | 0.625691354 | 0.119699918 | 5.227166095 | 1.72E-07    | 3.08E-06    |
| ENSMUSG000000113326 | 177.9358481 | 0.627065755 | 0.203596846 | 3.079938457 | 0.002070434 | 0.01211565  |
| ENSMUSG00000078435  | 465.6449919 | 0.62824361  | 0.181477338 | 3.461829541 | 0.000536517 | 0.00392548  |
| ENSMUSG00000067017  | 87.47816804 | 0.628628257 | 0.305677808 | 2.056506038 | 0.039733765 | 0.127427099 |
| ENSMUSG00000107741  | 111.918476  | 0.628816266 | 0.243251986 | 2.585040622 | 0.009736753 | 0.042484703 |
| ENSMUSG00000022094  | 6233.75648  | 0.629371128 | 0.1301993   | 4.833905629 | 1.34E-06    | 1.96E-05    |
| ENSMUSG00000036641  | 75.67630597 | 0.629472665 | 0.278366619 | 2.26130801  | 0.023740191 | 0.085488453 |
| ENSMUSG00000024851  | 2589.677015 | 0.629612959 | 0.143946049 | 4.373950975 | 1.22E-05    | 0.000142691 |
| ENSMUSG00000029833  | 7946.790276 | 0.630009419 | 0.160147777 | 3.933925478 | 8.36E-05    | 0.000786035 |
| ENSMUSG00000115570  | 89.43185324 | 0.630063384 | 0.301325083 | 2.090975561 | 0.036530255 | 0.119469308 |
| ENSMUSG00000085972  | 507.6363766 | 0.630364351 | 0.17488915  | 3.604365114 | 0.000312917 | 0.002476352 |
| ENSMUSG00000021779  | 3426.84433  | 0.63051814  | 0.135116424 | 4.666480356 | 3.06E-06    | 4.14E-05    |
| ENSMUSG00000028229  | 421.8046677 | 0.630722286 | 0.155355254 | 4.059870973 | 4.91E-05    | 0.000494123 |
| ENSMUSG00000022865  | 7283.458791 | 0.631193907 | 0.102566655 | 6.153987459 | 7.56E-10    | 2.01E-08    |
| ENSMUSG00000051910  | 3761.605705 | 0.631326119 | 0.10909693  | 5.786836719 | 7.17E-09    | 1.65E-07    |
| ENSMUSG00000070031  | 682.5017669 | 0.63175246  | 0.168882546 | 3.740780058 | 0.00018345  | 0.001551429 |
| ENSMUSG00000020072  | 1428.134751 | 0.631893396 | 0.188407183 | 3.353871048 | 0.000796895 | 0.00547682  |
| ENSMUSG00000030287  | 5596.825147 | 0.632092516 | 0.140345225 | 4.503840552 | 6.67E-06    | 8.32E-05    |
| ENSMUSG00000106822  | 98.16961473 | 0.632143254 | 0.308159586 | 2.051350279 | 0.040232847 | 0.128635517 |
| ENSMUSG00000093594  | 105.5735382 | 0.632259196 | 0.251284871 | 2.516105306 | 0.011865972 | 0.049536602 |
| ENSMUSG00000097585  | 384.2627022 | 0.632728819 | 0.199728578 | 3.167943341 | 0.001535214 | 0.009457963 |
| ENSMUSG00000103313  | 194.4225033 | 0.632754933 | 0.241442473 | 2.620727515 | 0.008774236 | 0.039166181 |
| ENSMUSG00000109008  | 246.7072442 | 0.633216184 | 0.183368979 | 3.453235053 | 0.000553906 | 0.00403418  |
| ENSMUSG00000113003  | 184.1232879 | 0.633303517 | 0.250708491 | 2.52605532  | 0.011535132 | 0.048454505 |
| ENSMUSG00000035112  | 3392.323599 | 0.6350589   | 0.163392848 | 3.886699485 | 0.000101616 | 0.000929511 |
| ENSMUSG00000027602  | 811.897973  | 0.635473708 | 0.168507677 | 3.771185495 | 0.000162474 | 0.001394124 |

|                    |             |             |             |             |             |             |
|--------------------|-------------|-------------|-------------|-------------|-------------|-------------|
| ENSMUSG00000035642 | 1625.622618 | 0.635751424 | 0.14754361  | 4.30890517  | 1.64E-05    | 0.000186579 |
| ENSMUSG00000022893 | 932.1328962 | 0.636111416 | 0.135361582 | 4.699349757 | 2.61E-06    | 3.59E-05    |
| ENSMUSG00000031227 | 97.22661871 | 0.63637247  | 0.291569638 | 2.182574544 | 0.029067156 | 0.099880839 |
| ENSMUSG00000041827 | 532.9727234 | 0.636560444 | 0.17282362  | 3.683295407 | 0.000230238 | 0.001893267 |
| ENSMUSG00000102555 | 210.7996541 | 0.63661958  | 0.281837041 | 2.258821541 | 0.023894488 | 0.085891518 |
| ENSMUSG00000042121 | 3034.527131 | 0.637076321 | 0.109172383 | 5.835508063 | 5.36E-09    | 1.25E-07    |
| ENSMUSG00000085148 | 193.4859237 | 0.637600142 | 0.264967061 | 2.406337375 | 0.016113376 | 0.062943494 |
| ENSMUSG00000095193 | 139.4632781 | 0.638785309 | 0.254338546 | 2.511555246 | 0.012020047 | 0.050020352 |
| ENSMUSG00000042510 | 3852.206385 | 0.638880187 | 0.117807897 | 5.423067567 | 5.86E-08    | 1.15E-06    |
| ENSMUSG00000021699 | 3021.277529 | 0.63912555  | 0.155758009 | 4.103323819 | 4.07E-05    | 0.000416425 |
| ENSMUSG00000019822 | 2390.527445 | 0.639404119 | 0.101774549 | 6.282554168 | 3.33E-10    | 9.35E-09    |
| ENSMUSG00000033400 | 1174.685006 | 0.639448715 | 0.120632206 | 5.3008126   | 1.15E-07    | 2.14E-06    |
| ENSMUSG00000071203 | 4172.605469 | 0.639825725 | 0.156321997 | 4.092998674 | 4.26E-05    | 0.000434421 |
| ENSMUSG00000055137 | 107.7237611 | 0.640284499 | 0.267566371 | 2.392993175 | 0.016711552 | 0.064668457 |
| ENSMUSG00000017715 | 3526.342576 | 0.64083717  | 0.20372673  | 3.145572353 | 0.001657622 | 0.010089974 |
| ENSMUSG00000028601 | 2179.255119 | 0.641133097 | 0.100227554 | 6.396774852 | 1.59E-10    | 4.67E-09    |
| ENSMUSG00000011034 | 11409.43593 | 0.641359253 | 0.147381072 | 4.351707072 | 1.35E-05    | 0.000156573 |
| ENSMUSG00000056758 | 2242.14347  | 0.641449693 | 0.139383361 | 4.602053552 | 4.18E-06    | 5.51E-05    |
| ENSMUSG00000024614 | 1551.269438 | 0.641509711 | 0.125450018 | 5.113667766 | 3.16E-07    | 5.31E-06    |
| ENSMUSG00000050471 | 1444.33102  | 0.641850363 | 0.153839221 | 4.172215382 | 3.02E-05    | 0.000318973 |
| ENSMUSG00000008305 | 6919.030429 | 0.642021675 | 0.127224332 | 5.046374908 | 4.50E-07    | 7.33E-06    |
| ENSMUSG00000024985 | 4994.433128 | 0.642339924 | 0.105724865 | 6.075580466 | 1.24E-09    | 3.17E-08    |
| ENSMUSG00000038528 | 253.5172928 | 0.643032797 | 0.205765395 | 3.125077449 | 0.001777583 | 0.010665017 |
| ENSMUSG00000060477 | 2948.116284 | 0.643584762 | 0.1216033   | 5.292494239 | 1.21E-07    | 2.23E-06    |
| ENSMUSG00000069305 | 7991.90157  | 0.644109769 | 0.131305807 | 4.905417254 | 9.32E-07    | 1.41E-05    |
| ENSMUSG00000091803 | 493.4849631 | 0.645281167 | 0.140293161 | 4.59951976  | 4.23E-06    | 5.57E-05    |
| ENSMUSG00000102714 | 110.8924533 | 0.64531084  | 0.245854189 | 2.624770574 | 0.008670737 | 0.038737266 |
| ENSMUSG00000104378 | 481.1913827 | 0.645951328 | 0.157337787 | 4.105506644 | 4.03E-05    | 0.000412891 |
| ENSMUSG00000022824 | 50807.36314 | 0.645967445 | 0.115867908 | 5.575033284 | 2.47E-08    | 5.15E-07    |



|                    |             |             |             |             |             |             |
|--------------------|-------------|-------------|-------------|-------------|-------------|-------------|
| ENSMUSG00000085303 | 61.16383308 | 0.646150892 | 0.315188031 | 2.050048953 | 0.040359654 | 0.128930045 |
| ENSMUSG00000049690 | 774.2831862 | 0.646766607 | 0.164204396 | 3.938789838 | 8.19E-05    | 0.000772551 |
| ENSMUSG00000072621 | 405.274732  | 0.647371259 | 0.162744079 | 3.9778483   | 6.95E-05    | 0.000670557 |
| ENSMUSG00000039428 | 3224.617629 | 0.64983658  | 0.121935386 | 5.329351878 | 9.86E-08    | 1.85E-06    |
| ENSMUSG00000056144 | 373.2514671 | 0.65014971  | 0.192690558 | 3.374061071 | 0.000740679 | 0.005157006 |
| ENSMUSG00000036452 | 2371.368086 | 0.650579615 | 0.14579915  | 4.46216329  | 8.11E-06    | 9.87E-05    |
| ENSMUSG00000018585 | 3129.612339 | 0.650594268 | 0.142123291 | 4.577675215 | 4.70E-06    | 6.11E-05    |
| ENSMUSG00000017144 | 4098.471909 | 0.650683778 | 0.145072121 | 4.485243434 | 7.28E-06    | 8.98E-05    |
| ENSMUSG00000002332 | 2838.439509 | 0.651338841 | 0.160006924 | 4.070691599 | 4.69E-05    | 0.000474935 |
| ENSMUSG00000026773 | 1466.498243 | 0.651974854 | 0.154030046 | 4.232777119 | 2.31E-05    | 0.000250613 |
| ENSMUSG00000025813 | 4914.394356 | 0.652109374 | 0.102721854 | 6.348302226 | 2.18E-10    | 6.27E-09    |
| ENSMUSG00000059669 | 672.5178547 | 0.652185713 | 0.144146724 | 4.524457404 | 6.06E-06    | 7.63E-05    |
| ENSMUSG00000031441 | 3159.615316 | 0.652742485 | 0.1848666   | 3.530883809 | 0.000414174 | 0.003161015 |
| ENSMUSG00000039801 | 1649.420428 | 0.653199731 | 0.1379658   | 4.734504724 | 2.20E-06    | 3.06E-05    |
| ENSMUSG00000024962 | 1606.708944 | 0.653644325 | 0.105351899 | 6.204390513 | 5.49E-10    | 1.48E-08    |
| ENSMUSG00000029314 | 1091.068332 | 0.654558317 | 0.172145315 | 3.802359173 | 0.000143325 | 0.001250992 |
| ENSMUSG00000044254 | 2868.228934 | 0.655164055 | 0.172329598 | 3.801808074 | 0.000143644 | 0.001252816 |
| ENSMUSG00000035236 | 1499.476421 | 0.655189352 | 0.122626072 | 5.342985739 | 9.14E-08    | 1.73E-06    |
| ENSMUSG00000106149 | 223.6838083 | 0.655354672 | 0.195213098 | 3.357124491 | 0.000787576 | 0.005420908 |
| ENSMUSG00000068130 | 507.285783  | 0.655361893 | 0.153015794 | 4.282968929 | 1.84E-05    | 0.000206597 |
| ENSMUSG00000023341 | 187.8699662 | 0.655558001 | 0.228888577 | 2.864092256 | 0.004182062 | 0.021454834 |
| ENSMUSG00000041769 | 2235.504547 | 0.656578648 | 0.111542835 | 5.886336376 | 3.95E-09    | 9.47E-08    |
| ENSMUSG00000042680 | 2196.219457 | 0.656635858 | 0.114473359 | 5.736145648 | 9.69E-09    | 2.16E-07    |
| ENSMUSG00000003033 | 1950.754263 | 0.656968213 | 0.114989433 | 5.713292032 | 1.11E-08    | 2.44E-07    |
| ENSMUSG00000097354 | 1155.922791 | 0.658965488 | 0.118582597 | 5.557016843 | 2.74E-08    | 5.63E-07    |
| ENSMUSG00000040148 | 148.131271  | 0.65900204  | 0.285847273 | 2.305434064 | 0.021142276 | 0.07790712  |
| ENSMUSG00000022329 | 2135.650544 | 0.659123986 | 0.137836835 | 4.781914684 | 1.74E-06    | 2.49E-05    |
| ENSMUSG00000026701 | 16237.17632 | 0.659420849 | 0.14492726  | 4.550012535 | 5.36E-06    | 6.86E-05    |
| ENSMUSG00000104164 | 108.8679448 | 0.659678938 | 0.262990631 | 2.508374293 | 0.012128812 | 0.050362346 |

|                    |             |             |             |             |             |             |
|--------------------|-------------|-------------|-------------|-------------|-------------|-------------|
| ENSMUSG00000064345 | 68789.04559 | 0.660024404 | 0.175856775 | 3.753192922 | 0.000174596 | 0.001486135 |
| ENSMUSG00000021930 | 948.8669903 | 0.660242939 | 0.1260124   | 5.239507682 | 1.61E-07    | 2.89E-06    |
| ENSMUSG00000113776 | 213.1972543 | 0.660504175 | 0.201494809 | 3.278020792 | 0.001045377 | 0.006907395 |
| ENSMUSG00000068566 | 2452.542831 | 0.661287541 | 0.114486078 | 5.776139363 | 7.64E-09    | 1.75E-07    |
| ENSMUSG00000030272 | 926.7758066 | 0.661856081 | 0.130127551 | 5.086210236 | 3.65E-07    | 6.05E-06    |
| ENSMUSG00000075486 | 1370.871457 | 0.662085532 | 0.11384199  | 5.815828871 | 6.03E-09    | 1.40E-07    |
| ENSMUSG00000059142 | 865.9972277 | 0.662962892 | 0.130667499 | 5.073663262 | 3.90E-07    | 6.42E-06    |
| ENSMUSG00000025199 | 3490.816087 | 0.662981354 | 0.114915872 | 5.769275764 | 7.96E-09    | 1.81E-07    |
| ENSMUSG00000020142 | 1202.288759 | 0.664134371 | 0.139042925 | 4.776470078 | 1.78E-06    | 2.55E-05    |
| ENSMUSG00000009246 | 2606.378687 | 0.664302875 | 0.213277529 | 3.11473449  | 0.001841106 | 0.010997894 |
| ENSMUSG00000029650 | 108.0855776 | 0.664519355 | 0.331847411 | 2.002484674 | 0.04523263  | 0.140531189 |
| ENSMUSG00000026579 | 471.4222284 | 0.664803522 | 0.212128734 | 3.133962622 | 0.001724628 | 0.010425843 |
| ENSMUSG00000015966 | 337.545031  | 0.66485028  | 0.226763096 | 2.931915694 | 0.003368782 | 0.018037744 |
| ENSMUSG00000107116 | 150.8029487 | 0.665697667 | 0.232784505 | 2.8597164   | 0.0042402   | 0.021678291 |
| ENSMUSG00000042388 | 57.19569658 | 0.665786729 | 0.323110034 | 2.060557264 | 0.039345297 | 0.126505115 |
| ENSMUSG00000111212 | 61.30163636 | 0.665906653 | 0.327438021 | 2.033687628 | 0.0419831   | 0.132747075 |
| ENSMUSG00000028124 | 3126.049197 | 0.667292225 | 0.107415651 | 6.212243911 | 5.22E-10    | 1.42E-08    |
| ENSMUSG00000091985 | 165.8235297 | 0.667585817 | 0.24824797  | 2.68918943  | 0.007162576 | 0.033222257 |
| ENSMUSG00000107756 | 189.9303706 | 0.668455051 | 0.313313326 | 2.133503417 | 0.032883452 | 0.110259187 |
| ENSMUSG00000110803 | 1402.281151 | 0.669290715 | 0.143815176 | 4.653825387 | 3.26E-06    | 4.37E-05    |
| ENSMUSG00000092626 | 109.633873  | 0.66979718  | 0.264967832 | 2.527843377 | 0.011476554 | 0.048289989 |
| ENSMUSG00000031732 | 2159.621893 | 0.670353656 | 0.134321921 | 4.99064972  | 6.02E-07    | 9.43E-06    |
| ENSMUSG00000024887 | 1866.173254 | 0.67040357  | 0.226473886 | 2.960180446 | 0.003074589 | 0.016776709 |
| ENSMUSG00000073102 | 157.0620216 | 0.670983791 | 0.271061571 | 2.475392544 | 0.013308981 | 0.05418101  |
| ENSMUSG00000060336 | 515.6470325 | 0.671276478 | 0.142996262 | 4.694363827 | 2.67E-06    | 3.67E-05    |
| ENSMUSG00000097032 | 494.1106525 | 0.671370891 | 0.172942989 | 3.882035888 | 0.000103586 | 0.000944811 |
| ENSMUSG00000021133 | 2997.469983 | 0.671631272 | 0.111738135 | 6.010761419 | 1.85E-09    | 4.64E-08    |
| ENSMUSG00000030513 | 460.3215692 | 0.672660462 | 0.253809648 | 2.650255681 | 0.008043088 | 0.036497471 |
| ENSMUSG00000027806 | 7208.262312 | 0.672666105 | 0.102324155 | 6.573874046 | 4.90E-11    | 1.54E-09    |

|                    |             |             |             |             |             |             |
|--------------------|-------------|-------------|-------------|-------------|-------------|-------------|
| ENSMUSG00000000409 | 241.6487164 | 0.672778059 | 0.207403194 | 3.243817252 | 0.001179394 | 0.007608233 |
| ENSMUSG00000022550 | 5899.90817  | 0.673283238 | 0.120959869 | 5.566170344 | 2.60E-08    | 5.36E-07    |
| ENSMUSG00000093327 | 93.17090898 | 0.673831459 | 0.341072248 | 1.975626757 | 0.048197066 | 0.147198407 |
| ENSMUSG00000097047 | 204.7161489 | 0.674611446 | 0.199410679 | 3.383025673 | 0.000716919 | 0.005016636 |
| ENSMUSG00000024232 | 819.7682548 | 0.67473808  | 0.252002514 | 2.677505358 | 0.007417267 | 0.034225629 |
| ENSMUSG00000037649 | 2545.487556 | 0.675197067 | 0.18390985  | 3.671348047 | 0.000241275 | 0.001971661 |
| ENSMUSG00000106427 | 73.5587188  | 0.676149566 | 0.298457048 | 2.265483662 | 0.023483015 | 0.084712832 |
| ENSMUSG00000103507 | 67.65098708 | 0.676545288 | 0.31218853  | 2.167104882 | 0.030226858 | 0.102835874 |
| ENSMUSG00000035954 | 2463.357974 | 0.67658382  | 0.134200449 | 5.041591346 | 4.62E-07    | 7.50E-06    |
| ENSMUSG00000056665 | 388.2321242 | 0.676694526 | 0.148030291 | 4.571324698 | 4.85E-06    | 6.28E-05    |
| ENSMUSG00000090674 | 229.9448085 | 0.67710153  | 0.240161501 | 2.819359166 | 0.004811964 | 0.024077095 |
| ENSMUSG00000038473 | 1107.451254 | 0.677176876 | 0.128304528 | 5.277887571 | 1.31E-07    | 2.39E-06    |
| ENSMUSG00000000690 | 72.60241862 | 0.67718534  | 0.340964245 | 1.986089014 | 0.047023441 | 0.144604213 |
| ENSMUSG00000027531 | 3117.088676 | 0.677447159 | 0.108353715 | 6.252182141 | 4.05E-10    | 1.12E-08    |
| ENSMUSG00000110087 | 52.50212756 | 0.677471608 | 0.33717794  | 2.009240607 | 0.044511623 | 0.138716281 |
| ENSMUSG00000038539 | 846.5525691 | 0.677592212 | 0.215876165 | 3.138800485 | 0.001696409 | 0.010278508 |
| ENSMUSG00000036890 | 583.0050538 | 0.677757699 | 0.145599002 | 4.654961151 | 3.24E-06    | 4.35E-05    |
| ENSMUSG00000036027 | 138.9558385 | 0.677978658 | 0.297973364 | 2.275299537 | 0.022887967 | 0.08298237  |
| ENSMUSG00000019791 | 742.1632158 | 0.678408275 | 0.164830382 | 4.11579628  | 3.86E-05    | 0.000396531 |
| ENSMUSG00000104273 | 124.3507716 | 0.678484833 | 0.252164173 | 2.690647226 | 0.007131356 | 0.033118778 |
| ENSMUSG00000113200 | 88.87639985 | 0.678510781 | 0.264853656 | 2.561832793 | 0.010412143 | 0.044749182 |
| ENSMUSG00000042770 | 478.0212862 | 0.678573105 | 0.212812501 | 3.188596075 | 0.001429655 | 0.00891077  |
| ENSMUSG00000080767 | 298.2517158 | 0.678748313 | 0.21840837  | 3.107702849 | 0.001885475 | 0.011227767 |
| ENSMUSG00000045348 | 198.2693657 | 0.679242489 | 0.251585364 | 2.699848985 | 0.006937096 | 0.032385215 |
| ENSMUSG00000004035 | 658.6799526 | 0.679381576 | 0.215266682 | 3.15599966  | 0.00159949  | 0.009803682 |
| ENSMUSG00000108984 | 96.03342821 | 0.679647136 | 0.270347638 | 2.51397475  | 0.011937898 | 0.049771371 |
| ENSMUSG00000105842 | 76.28215304 | 0.680194522 | 0.281289897 | 2.418126382 | 0.015600657 | 0.061397061 |
| ENSMUSG00000102573 | 317.4443503 | 0.681477002 | 0.211507578 | 3.221998041 | 0.001273    | 0.008101638 |
| ENSMUSG00000021815 | 170.9983    | 0.681656352 | 0.232883834 | 2.92702306  | 0.003422235 | 0.018258501 |

|                    |             |             |              |             |             |             |
|--------------------|-------------|-------------|--------------|-------------|-------------|-------------|
| ENSMUSG00000021068 | 3397.313309 | 0.682232637 | 0.163819647  | 4.164534899 | 3.12E-05    | 0.000328191 |
| ENSMUSG00000038774 | 8127.200536 | 0.682398243 | 0.115655255  | 5.900278757 | 3.63E-09    | 8.77E-08    |
| ENSMUSG00000004798 | 1864.052729 | 0.683373984 | 0.1111707142 | 6.117549627 | 9.50E-10    | 2.48E-08    |
| ENSMUSG00000021773 | 1698.026298 | 0.683632967 | 0.121125817  | 5.64399057  | 1.66E-08    | 3.57E-07    |
| ENSMUSG00000020230 | 287.7116996 | 0.684988612 | 0.186412254  | 3.674590049 | 0.000238232 | 0.001949653 |
| ENSMUSG00000046718 | 364.3006411 | 0.685278979 | 0.186034912  | 3.68360417  | 0.000229959 | 0.001891671 |
| ENSMUSG00000101970 | 1591.772978 | 0.685334835 | 0.123015598  | 5.571121417 | 2.53E-08    | 5.24E-07    |
| ENSMUSG00000027377 | 631.3424757 | 0.685349832 | 0.200325799  | 3.421176084 | 0.000623509 | 0.004462415 |
| ENSMUSG00000113196 | 86.49484671 | 0.685661263 | 0.297883761  | 2.301774564 | 0.021347889 | 0.078561216 |
| ENSMUSG00000035299 | 1948.34052  | 0.685742912 | 0.133379838  | 5.141278636 | 2.73E-07    | 4.66E-06    |
| ENSMUSG00000084174 | 451.5468316 | 0.686080399 | 0.276602903  | 2.480380323 | 0.013124231 | 0.053585405 |
| ENSMUSG00000030660 | 10662.65037 | 0.686191683 | 0.123127929  | 5.572997856 | 2.50E-08    | 5.20E-07    |
| ENSMUSG00000070605 | 353.8527451 | 0.686418543 | 0.187197663  | 3.666811492 | 0.000245594 | 0.00200036  |
| ENSMUSG00000041959 | 5513.361411 | 0.687500048 | 0.135135071  | 5.087502762 | 3.63E-07    | 6.02E-06    |
| ENSMUSG00000103002 | 77.14177398 | 0.687522225 | 0.301440112  | 2.280792097 | 0.022560752 | 0.082049468 |
| ENSMUSG00000065734 | 140.1104253 | 0.687885136 | 0.247396242  | 2.780499536 | 0.005427534 | 0.026537915 |
| ENSMUSG00000096205 | 89.32635413 | 0.688054202 | 0.300077603  | 2.292920882 | 0.02185256  | 0.079993435 |
| ENSMUSG00000096932 | 102.8204303 | 0.688436138 | 0.258793838  | 2.660172063 | 0.007810074 | 0.035661848 |
| ENSMUSG00000090561 | 65.19520093 | 0.689263364 | 0.319599444  | 2.156647572 | 0.031033135 | 0.105113904 |
| ENSMUSG00000031626 | 9856.93702  | 0.689464574 | 0.159490629  | 4.322915896 | 1.54E-05    | 0.000176642 |
| ENSMUSG00000033446 | 1249.958476 | 0.689850794 | 0.160913908  | 4.287079984 | 1.81E-05    | 0.000203596 |
| ENSMUSG00000096215 | 358.5585967 | 0.690490061 | 0.177019919  | 3.900634833 | 9.59E-05    | 0.000885219 |
| ENSMUSG00000022257 | 2451.977825 | 0.690694132 | 0.103859855  | 6.650251288 | 2.93E-11    | 9.48E-10    |
| ENSMUSG00000104293 | 122.9842691 | 0.691844231 | 0.25740355   | 2.687780454 | 0.007192867 | 0.033341952 |
| ENSMUSG00000035476 | 1766.545833 | 0.692110821 | 0.120606455  | 5.738588544 | 9.55E-09    | 2.14E-07    |
| ENSMUSG00000023206 | 901.4895552 | 0.693394057 | 0.16628558   | 4.16989889  | 3.05E-05    | 0.000321775 |
| ENSMUSG00000032602 | 1770.776869 | 0.694814842 | 0.127146449  | 5.464681467 | 4.64E-08    | 9.23E-07    |
| ENSMUSG00000038884 | 1425.973416 | 0.694998773 | 0.142066645  | 4.892061548 | 9.98E-07    | 1.50E-05    |
| ENSMUSG00000107083 | 183.2035047 | 0.695909474 | 0.214343236  | 3.246706011 | 0.001167489 | 0.007546509 |

|                    |             |             |             |             |             |             |
|--------------------|-------------|-------------|-------------|-------------|-------------|-------------|
| ENSMUSG00000031200 | 319.5907284 | 0.696322922 | 0.17783509  | 3.915554135 | 9.02E-05    | 0.000838116 |
| ENSMUSG00000026712 | 53.99837889 | 0.69696714  | 0.345561284 | 2.016913271 | 0.043704565 | 0.136774558 |
| ENSMUSG00000002233 | 587.0693265 | 0.697017559 | 0.222465574 | 3.133147952 | 0.001729422 | 0.01044633  |
| ENSMUSG00000096795 | 126.5206644 | 0.697718731 | 0.236851427 | 2.945807591 | 0.003221127 | 0.017385384 |
| ENSMUSG00000031563 | 525.0714187 | 0.697790561 | 0.192686456 | 3.621378353 | 0.000293038 | 0.002341466 |
| ENSMUSG00000099632 | 66.6976932  | 0.697927857 | 0.290758388 | 2.400370496 | 0.016378485 | 0.063722365 |
| ENSMUSG00000103657 | 162.7107892 | 0.698815452 | 0.233552062 | 2.992118529 | 0.002770487 | 0.015415325 |
| ENSMUSG00000010095 | 5856.421383 | 0.699284253 | 0.109956471 | 6.3596462   | 2.02E-10    | 5.86E-09    |
| ENSMUSG00000020115 | 5381.741144 | 0.699434314 | 0.120037816 | 5.826783062 | 5.65E-09    | 1.31E-07    |
| ENSMUSG00000089669 | 442.6063553 | 0.699448661 | 0.169214796 | 4.133495864 | 3.57E-05    | 0.00037077  |
| ENSMUSG00000033308 | 8931.986589 | 0.699817215 | 0.133673804 | 5.23526071  | 1.65E-07    | 2.96E-06    |
| ENSMUSG00000024401 | 1627.99201  | 0.700666104 | 0.207180101 | 3.381917954 | 0.000719816 | 0.005032171 |
| ENSMUSG00000112822 | 124.8771348 | 0.701148833 | 0.23342746  | 3.00371187  | 0.002667078 | 0.014959382 |
| ENSMUSG00000103697 | 141.1556607 | 0.701439983 | 0.240556971 | 2.915899624 | 0.003546646 | 0.018764828 |
| ENSMUSG00000027799 | 8270.843938 | 0.701964192 | 0.118483291 | 5.924583864 | 3.13E-09    | 7.61E-08    |
| ENSMUSG00000034101 | 2349.70064  | 0.702498413 | 0.131609431 | 5.337751312 | 9.41E-08    | 1.78E-06    |
| ENSMUSG00000052396 | 1246.756142 | 0.702699739 | 0.200927531 | 3.497279521 | 0.000470029 | 0.003517489 |
| ENSMUSG00000078942 | 14511.38304 | 0.702767884 | 0.142503265 | 4.931591448 | 8.16E-07    | 1.26E-05    |
| ENSMUSG00000004383 | 3207.389803 | 0.703074412 | 0.104718123 | 6.713970711 | 1.89E-11    | 6.30E-10    |
| ENSMUSG00000033107 | 978.6351251 | 0.703176241 | 0.219738555 | 3.20005854  | 0.001373997 | 0.008621406 |
| ENSMUSG00000103621 | 100.2658889 | 0.703179575 | 0.272464559 | 2.580811164 | 0.009856848 | 0.042882866 |
| ENSMUSG00000114602 | 107.3721412 | 0.703215714 | 0.240371208 | 2.925540549 | 0.003438584 | 0.018315488 |
| ENSMUSG00000108461 | 289.4290458 | 0.703445809 | 0.192908141 | 3.646532518 | 0.000265803 | 0.002142295 |
| ENSMUSG00000057103 | 387.3970148 | 0.703576705 | 0.221692838 | 3.173655549 | 0.001505322 | 0.009296646 |
| ENSMUSG00000064856 | 123.9807721 | 0.70397649  | 0.277653896 | 2.535446104 | 0.011230421 | 0.04751463  |
| ENSMUSG00000055401 | 462.2156485 | 0.705798463 | 0.166290762 | 4.244363632 | 2.19E-05    | 0.00023991  |
| ENSMUSG00000020844 | 110.8539108 | 0.706091635 | 0.274148777 | 2.575578277 | 0.010007262 | 0.043401779 |
| ENSMUSG00000033906 | 1156.594127 | 0.707996246 | 0.162452186 | 4.358182327 | 1.31E-05    | 0.000152567 |
| ENSMUSG00000022270 | 1418.282401 | 0.708487804 | 0.214407348 | 3.304400763 | 0.000951797 | 0.00637801  |

|                    |             |             |             |             |             |             |
|--------------------|-------------|-------------|-------------|-------------|-------------|-------------|
| ENSMUSG00000038545 | 1475.994847 | 0.708696846 | 0.170859252 | 4.147840032 | 3.36E-05    | 0.000350085 |
| ENSMUSG00000063245 | 148.6735262 | 0.70986454  | 0.240469759 | 2.951990894 | 0.003157322 | 0.017119243 |
| ENSMUSG00000003812 | 344.8824088 | 0.71043088  | 0.199161872 | 3.56710285  | 0.00036095  | 0.002806674 |
| ENSMUSG00000102764 | 87.04684943 | 0.710971407 | 0.307304354 | 2.313574141 | 0.020691093 | 0.076573527 |
| ENSMUSG00000086920 | 147.9767681 | 0.711220192 | 0.216587034 | 3.283761626 | 0.001024315 | 0.006776403 |
| ENSMUSG00000032372 | 65.52848723 | 0.711301647 | 0.338695331 | 2.100122388 | 0.035718076 | 0.117363905 |
| ENSMUSG00000026024 | 4165.303675 | 0.711389496 | 0.142247407 | 5.001071805 | 5.70E-07    | 9.02E-06    |
| ENSMUSG00000031938 | 3497.386991 | 0.7115091   | 0.114549129 | 6.211388146 | 5.25E-10    | 1.42E-08    |
| ENSMUSG00000078612 | 124.629344  | 0.711741689 | 0.273788167 | 2.599607193 | 0.009333052 | 0.041076851 |
| ENSMUSG00000026077 | 2217.975294 | 0.712020283 | 0.208298279 | 3.418272512 | 0.0006302   | 0.004503071 |
| ENSMUSG00000028019 | 50.56341279 | 0.712440504 | 0.363201504 | 1.961557142 | 0.049814066 | 0.15069425  |
| ENSMUSG00000085241 | 1047.314915 | 0.712459384 | 0.176565943 | 4.035089503 | 5.46E-05    | 0.0005401   |
| ENSMUSG00000030451 | 19692.93201 | 0.713043803 | 0.111882115 | 6.37317057  | 1.85E-10    | 5.40E-09    |
| ENSMUSG00000041301 | 31488.64176 | 0.713132776 | 0.118152344 | 6.035705684 | 1.58E-09    | 4.01E-08    |
| ENSMUSG00000029471 | 1270.260906 | 0.713425379 | 0.151662496 | 4.704032949 | 2.55E-06    | 3.52E-05    |
| ENSMUSG00000079427 | 604.1780604 | 0.713510285 | 0.140172168 | 5.090242202 | 3.58E-07    | 5.95E-06    |
| ENSMUSG00000047242 | 94.80385111 | 0.71421159  | 0.277791265 | 2.571036892 | 0.010139453 | 0.043838684 |
| ENSMUSG00000021928 | 578.8232323 | 0.716895727 | 0.140087798 | 5.117474439 | 3.10E-07    | 5.22E-06    |
| ENSMUSG00000050944 | 823.2350017 | 0.717415174 | 0.137600907 | 5.213738682 | 1.85E-07    | 3.28E-06    |
| ENSMUSG00000026385 | 14256.86646 | 0.718307584 | 0.122515303 | 5.863002944 | 4.55E-09    | 1.08E-07    |
| ENSMUSG00000052914 | 2758.642718 | 0.718478293 | 0.149156983 | 4.816926964 | 1.46E-06    | 2.12E-05    |
| ENSMUSG00000028134 | 2534.997699 | 0.718874373 | 0.136644317 | 5.26091674  | 1.43E-07    | 2.61E-06    |
| ENSMUSG00000028159 | 980.4285194 | 0.719036581 | 0.122266605 | 5.880891035 | 4.08E-09    | 9.74E-08    |
| ENSMUSG00000106087 | 108.0206183 | 0.719119478 | 0.270382939 | 2.659633336 | 0.007822576 | 0.03570078  |
| ENSMUSG00000022837 | 408.9178375 | 0.719248962 | 0.200904104 | 3.58006107  | 0.000343514 | 0.002680442 |
| ENSMUSG00000022261 | 1567.957645 | 0.720041005 | 0.116558812 | 6.177490955 | 6.51E-10    | 1.75E-08    |
| ENSMUSG00000037613 | 130.1618487 | 0.720221363 | 0.271480423 | 2.652940328 | 0.007979398 | 0.036271615 |
| ENSMUSG00000019996 | 7882.988621 | 0.720343977 | 0.104170305 | 6.915060622 | 4.68E-12    | 1.68E-10    |
| ENSMUSG00000102664 | 140.5059596 | 0.720433899 | 0.248755187 | 2.896156291 | 0.003777642 | 0.01970187  |

|                    |             |             |             |             |             |             |
|--------------------|-------------|-------------|-------------|-------------|-------------|-------------|
| ENSMUSG00000039431 | 2884.902911 | 0.721759742 | 0.114817625 | 6.286140658 | 3.25E-10    | 9.15E-09    |
| ENSMUSG00000040511 | 1702.904866 | 0.722141528 | 0.124008863 | 5.82330578  | 5.77E-09    | 1.34E-07    |
| ENSMUSG00000056899 | 1798.711459 | 0.722645574 | 0.155518761 | 4.646677797 | 3.37E-06    | 4.50E-05    |
| ENSMUSG00000019960 | 1210.180382 | 0.722646706 | 0.175526735 | 4.117017867 | 3.84E-05    | 0.000394982 |
| ENSMUSG00000097908 | 101.9348235 | 0.722758211 | 0.245188622 | 2.947764077 | 0.003200812 | 0.017303625 |
| ENSMUSG00000040811 | 2077.996788 | 0.72317713  | 0.163807272 | 4.414804795 | 1.01E-05    | 0.000120184 |
| ENSMUSG00000037157 | 2474.223345 | 0.723180558 | 0.17542139  | 4.122533514 | 3.75E-05    | 0.000387248 |
| ENSMUSG00000102672 | 77.73874251 | 0.723572276 | 0.307743049 | 2.351222161 | 0.018711858 | 0.070703685 |
| ENSMUSG00000015879 | 220.2403335 | 0.723958494 | 0.191804464 | 3.774461132 | 0.000160354 | 0.001378055 |
| ENSMUSG00000104344 | 148.964505  | 0.724342529 | 0.255143356 | 2.838962924 | 0.004526042 | 0.022855394 |
| ENSMUSG00000032336 | 4282.497449 | 0.72458517  | 0.114004878 | 6.355738302 | 2.07E-10    | 6.00E-09    |
| ENSMUSG00000026064 | 4567.984435 | 0.725193943 | 0.118115073 | 6.139723947 | 8.27E-10    | 2.19E-08    |
| ENSMUSG00000037593 | 138.5911506 | 0.725385041 | 0.242197847 | 2.995010275 | 0.002744356 | 0.015311955 |
| ENSMUSG00000063689 | 1092.305776 | 0.725576755 | 0.130545602 | 5.558032921 | 2.73E-08    | 5.60E-07    |
| ENSMUSG00000077506 | 747.9001708 | 0.726376844 | 0.184110982 | 3.945320566 | 7.97E-05    | 0.000753707 |
| ENSMUSG00000016534 | 5335.784699 | 0.726449086 | 0.111196688 | 6.533010122 | 6.45E-11    | 2.00E-09    |
| ENSMUSG00000011171 | 81.05442836 | 0.726584712 | 0.32237172  | 2.25387237  | 0.024204198 | 0.086781001 |
| ENSMUSG00000032997 | 881.2136537 | 0.727213424 | 0.123606381 | 5.883300039 | 4.02E-09    | 9.61E-08    |
| ENSMUSG00000024610 | 55801.06859 | 0.727533204 | 0.349702396 | 2.080435283 | 0.037485626 | 0.121665979 |
| ENSMUSG00000020846 | 2511.655424 | 0.72776857  | 0.138593881 | 5.251087322 | 1.51E-07    | 2.74E-06    |
| ENSMUSG00000015224 | 329.5579162 | 0.727931457 | 0.170744743 | 4.263273016 | 2.01E-05    | 0.000222738 |
| ENSMUSG00000062949 | 2190.3829   | 0.727957026 | 0.138679028 | 5.249222147 | 1.53E-07    | 2.76E-06    |
| ENSMUSG00000084195 | 61.08130846 | 0.728020398 | 0.3288206   | 2.214035246 | 0.026826354 | 0.094154002 |
| ENSMUSG00000024942 | 14730.04026 | 0.728187914 | 0.12568684  | 5.793668742 | 6.89E-09    | 1.58E-07    |
| ENSMUSG00000098900 | 61.26755274 | 0.729449818 | 0.335377431 | 2.175011644 | 0.029629244 | 0.101328288 |
| ENSMUSG00000111069 | 57.6081962  | 0.729995934 | 0.352381575 | 2.071606425 | 0.03830216  | 0.123855504 |
| ENSMUSG00000063663 | 4222.097337 | 0.730360606 | 0.109747463 | 6.654920189 | 2.83E-11    | 9.23E-10    |
| ENSMUSG00000103303 | 47.53897647 | 0.731034949 | 0.344196604 | 2.123887741 | 0.033679532 | 0.112069119 |
| ENSMUSG00000038718 | 1241.334452 | 0.731363183 | 0.122779653 | 5.956713215 | 2.57E-09    | 6.33E-08    |

|                    |             |             |             |             |             |             |
|--------------------|-------------|-------------|-------------|-------------|-------------|-------------|
| ENSMUSG00000029672 | 1331.875376 | 0.731633622 | 0.126832555 | 5.768500204 | 8.00E-09    | 1.82E-07    |
| ENSMUSG00000033530 | 584.3672062 | 0.732262797 | 0.16286152  | 4.496229664 | 6.92E-06    | 8.60E-05    |
| ENSMUSG00000097589 | 1236.53162  | 0.733005702 | 0.164148449 | 4.465504905 | 7.99E-06    | 9.75E-05    |
| ENSMUSG00000052595 | 5001.316099 | 0.73412328  | 0.136910484 | 5.362067654 | 8.23E-08    | 1.58E-06    |
| ENSMUSG00000036151 | 1352.067408 | 0.735368704 | 0.187867831 | 3.914287512 | 9.07E-05    | 0.000840776 |
| ENSMUSG00000029279 | 67.53251568 | 0.735420411 | 0.333325614 | 2.206312323 | 0.027362139 | 0.095403856 |
| ENSMUSG00000102258 | 441.3098111 | 0.735471046 | 0.183124073 | 4.016244466 | 5.91E-05    | 0.000580169 |
| ENSMUSG00000043964 | 518.7301532 | 0.735807255 | 0.144389714 | 5.095981118 | 3.47E-07    | 5.78E-06    |
| ENSMUSG00000047446 | 2437.437359 | 0.736315759 | 0.168480485 | 4.370332618 | 1.24E-05    | 0.000144848 |
| ENSMUSG00000021589 | 2582.602282 | 0.736851547 | 0.154763045 | 4.76115954  | 1.92E-06    | 2.72E-05    |
| ENSMUSG00000027624 | 1763.566519 | 0.736950827 | 0.143593206 | 5.13221237  | 2.86E-07    | 4.87E-06    |
| ENSMUSG00000030793 | 18163.83423 | 0.73719428  | 0.101241203 | 7.281563835 | 3.30E-13    | 1.33E-11    |
| ENSMUSG00000041135 | 914.2255109 | 0.737495394 | 0.141612608 | 5.207837102 | 1.91E-07    | 3.38E-06    |
| ENSMUSG00000103495 | 83.26817622 | 0.738186135 | 0.300551299 | 2.456106955 | 0.014045135 | 0.056630004 |
| ENSMUSG00000103926 | 82.78197792 | 0.738734046 | 0.292114526 | 2.528919247 | 0.011441435 | 0.048224426 |
| ENSMUSG00000037287 | 1844.145513 | 0.739682813 | 0.114345029 | 6.468867244 | 9.87E-11    | 3.00E-09    |
| ENSMUSG00000092618 | 2617.250605 | 0.74034012  | 0.136984396 | 5.40455806  | 6.50E-08    | 1.27E-06    |
| ENSMUSG00000098449 | 215.5157378 | 0.740367358 | 0.241610258 | 3.064304324 | 0.002181768 | 0.012641106 |
| ENSMUSG00000061825 | 1732.964638 | 0.741979939 | 0.1949947   | 3.805128746 | 0.00014173  | 0.001240275 |
| ENSMUSG00000104402 | 101.5847576 | 0.741985614 | 0.280633762 | 2.643964178 | 0.008194133 | 0.037081444 |
| ENSMUSG00000021176 | 439.1241339 | 0.744083564 | 0.155868536 | 4.77378938  | 1.81E-06    | 2.58E-05    |
| ENSMUSG00000063889 | 522.3858981 | 0.744592715 | 0.151039591 | 4.929785022 | 8.23E-07    | 1.26E-05    |
| ENSMUSG00000103937 | 152.3386934 | 0.747033021 | 0.22745711  | 3.284280812 | 0.00102243  | 0.006767946 |
| ENSMUSG00000102670 | 53.0483252  | 0.747075462 | 0.33696286  | 2.217085473 | 0.026617251 | 0.093603906 |
| ENSMUSG00000049303 | 130.9602503 | 0.747400164 | 0.301138321 | 2.481916484 | 0.01306779  | 0.053413633 |
| ENSMUSG00000109154 | 98.69730318 | 0.747887839 | 0.316874866 | 2.360199304 | 0.018265119 | 0.069368723 |
| ENSMUSG00000064602 | 186.3958782 | 0.748248238 | 0.240895603 | 3.106109979 | 0.001895662 | 0.011267366 |
| ENSMUSG00000105643 | 149.9485872 | 0.749168185 | 0.281366524 | 2.662605968 | 0.007753815 | 0.035475016 |
| ENSMUSG00000090622 | 75.51585855 | 0.749285    | 0.304728697 | 2.458859328 | 0.013937922 | 0.056289315 |



|                    |             |             |             |             |             |             |
|--------------------|-------------|-------------|-------------|-------------|-------------|-------------|
| ENSMUSG00000081984 | 84.11186517 | 0.749350833 | 0.294328919 | 2.545964002 | 0.010897643 | 0.046432619 |
| ENSMUSG00000105304 | 60.76730335 | 0.749839771 | 0.352849592 | 2.125097458 | 0.033578482 | 0.111866406 |
| ENSMUSG00000020901 | 852.4498693 | 0.750732721 | 0.210900842 | 3.559647821 | 0.000371352 | 0.002873536 |
| ENSMUSG00000103227 | 81.81142152 | 0.750962655 | 0.283358052 | 2.650225221 | 0.008043813 | 0.036497471 |
| ENSMUSG00000035762 | 2925.574996 | 0.751131601 | 0.122523511 | 6.130509914 | 8.76E-10    | 2.30E-08    |
| ENSMUSG00000077714 | 538.6448042 | 0.751318195 | 0.139867669 | 5.371635925 | 7.80E-08    | 1.51E-06    |
| ENSMUSG00000112900 | 77.95630306 | 0.751462879 | 0.309108678 | 2.431063675 | 0.015054569 | 0.059685677 |
| ENSMUSG00000097350 | 110.9876026 | 0.751615498 | 0.244735599 | 3.071132692 | 0.002132484 | 0.012407127 |
| ENSMUSG00000027078 | 375.9895785 | 0.752179647 | 0.190539016 | 3.94764108  | 7.89E-05    | 0.000747391 |
| ENSMUSG00000029003 | 515.0220857 | 0.752362589 | 0.158314679 | 4.752323615 | 2.01E-06    | 2.83E-05    |
| ENSMUSG00000040653 | 99.52722862 | 0.752417078 | 0.311276296 | 2.417200048 | 0.015640419 | 0.061494531 |
| ENSMUSG00000096655 | 95.497355   | 0.752511447 | 0.256191822 | 2.937296907 | 0.00331087  | 0.017774603 |
| ENSMUSG00000015501 | 3201.137064 | 0.752706273 | 0.115458732 | 6.519266768 | 7.07E-11    | 2.17E-09    |
| ENSMUSG00000064871 | 106.1288688 | 0.752918218 | 0.256014154 | 2.940924195 | 0.003272346 | 0.017612227 |
| ENSMUSG00000089542 | 189.8129255 | 0.754502805 | 0.256408663 | 2.942579227 | 0.003254905 | 0.017538229 |
| ENSMUSG00000041372 | 2111.665487 | 0.754519008 | 0.15998125  | 4.716296479 | 2.40E-06    | 3.32E-05    |
| ENSMUSG00000039195 | 414.2635978 | 0.754674892 | 0.19292138  | 3.911826122 | 9.16E-05    | 0.000848687 |
| ENSMUSG00000026980 | 3403.166465 | 0.755239746 | 0.129582115 | 5.828271493 | 5.60E-09    | 1.30E-07    |
| ENSMUSG00000108560 | 47.38793871 | 0.755538732 | 0.375119234 | 2.014129544 | 0.043995934 | 0.137454936 |
| ENSMUSG00000050212 | 81.34901295 | 0.756373366 | 0.367007851 | 2.06091876  | 0.039310791 | 0.126412394 |
| ENSMUSG00000110386 | 608.2494499 | 0.756745146 | 0.190192849 | 3.978830693 | 6.93E-05    | 0.000668596 |
| ENSMUSG00000062929 | 1189.402746 | 0.756826593 | 0.116998106 | 6.468708056 | 9.88E-11    | 3.00E-09    |
| ENSMUSG00000107171 | 265.5272329 | 0.757009194 | 0.198801921 | 3.807856529 | 0.000140177 | 0.001229287 |
| ENSMUSG00000068011 | 905.8044766 | 0.757389371 | 0.150361386 | 5.037126835 | 4.73E-07    | 7.65E-06    |
| ENSMUSG00000106837 | 102.1139671 | 0.759430031 | 0.312161189 | 2.432813745 | 0.014982005 | 0.059514375 |
| ENSMUSG00000022564 | 1162.178931 | 0.759832261 | 0.149196912 | 5.092814913 | 3.53E-07    | 5.87E-06    |
| ENSMUSG00000100131 | 314.8834323 | 0.760494351 | 0.250004357 | 3.041924393 | 0.002350709 | 0.013452186 |
| ENSMUSG00000042129 | 10382.59045 | 0.760644302 | 0.166873211 | 4.558216983 | 5.16E-06    | 6.65E-05    |
| ENSMUSG00000064901 | 108.6577398 | 0.760783229 | 0.268624141 | 2.832147649 | 0.004623649 | 0.023249606 |

|                    |             |             |             |             |             |             |
|--------------------|-------------|-------------|-------------|-------------|-------------|-------------|
| ENSMUSG00000072949 | 2602.864931 | 0.760844828 | 0.139736156 | 5.444867295 | 5.18E-08    | 1.02E-06    |
| ENSMUSG00000020573 | 522.1728359 | 0.76108612  | 0.228730445 | 3.32743689  | 0.000876488 | 0.005970241 |
| ENSMUSG00000070867 | 45.2588984  | 0.761174335 | 0.371775066 | 2.047405553 | 0.040618282 | 0.129515056 |
| ENSMUSG00000038578 | 323.9561282 | 0.761264118 | 0.17927859  | 4.246263418 | 2.17E-05    | 0.000238439 |
| ENSMUSG00000096145 | 89.88212016 | 0.761457466 | 0.300553865 | 2.533514136 | 0.011292519 | 0.047723035 |
| ENSMUSG00000086015 | 90.41849294 | 0.761597271 | 0.258089691 | 2.950901555 | 0.003168479 | 0.017171385 |
| ENSMUSG00000046056 | 64.49483012 | 0.761670198 | 0.310911504 | 2.449797412 | 0.014293661 | 0.057445114 |
| ENSMUSG00000024843 | 12735.34712 | 0.762435565 | 0.156078573 | 4.884947053 | 1.03E-06    | 1.55E-05    |
| ENSMUSG00000044471 | 314.47227   | 0.762584337 | 0.231031351 | 3.300782914 | 0.000964155 | 0.00644672  |
| ENSMUSG00000108693 | 219.8701364 | 0.763833908 | 0.236183893 | 3.234064354 | 0.00122042  | 0.007814119 |
| ENSMUSG00000110277 | 865.4664451 | 0.763858492 | 0.144589247 | 5.282955046 | 1.27E-07    | 2.34E-06    |
| ENSMUSG00000032479 | 6566.506049 | 0.764465259 | 0.104498873 | 7.315535895 | 2.56E-13    | 1.05E-11    |
| ENSMUSG00000022637 | 3703.116715 | 0.765130801 | 0.170660332 | 4.483354704 | 7.35E-06    | 9.05E-05    |
| ENSMUSG00000008540 | 7063.408575 | 0.765542009 | 0.10531093  | 7.269350012 | 3.61E-13    | 1.45E-11    |
| ENSMUSG00000067161 | 46.32884382 | 0.76600499  | 0.361621857 | 2.118248591 | 0.03415402  | 0.113323243 |
| ENSMUSG00000031618 | 3364.298684 | 0.766281112 | 0.136430261 | 5.616650647 | 1.95E-08    | 4.12E-07    |
| ENSMUSG00000020634 | 4932.737715 | 0.766779557 | 0.101242989 | 7.573655869 | 3.63E-14    | 1.65E-12    |
| ENSMUSG00000020415 | 1366.960882 | 0.767324993 | 0.135739847 | 5.652908915 | 1.58E-08    | 3.40E-07    |
| ENSMUSG00000023828 | 120.0936325 | 0.767425519 | 0.255795604 | 3.000151326 | 0.002698455 | 0.015095262 |
| ENSMUSG00000070426 | 1676.483712 | 0.767665961 | 0.131726161 | 5.827741066 | 5.62E-09    | 1.31E-07    |
| ENSMUSG00000026672 | 3641.945423 | 0.767747381 | 0.115973272 | 6.620037236 | 3.59E-11    | 1.16E-09    |
| ENSMUSG00000095115 | 1357.107774 | 0.768629375 | 0.125926585 | 6.103789535 | 1.04E-09    | 2.69E-08    |
| ENSMUSG00000016493 | 217.3084482 | 0.769554925 | 0.217731827 | 3.53441633  | 0.000408677 | 0.003122268 |
| ENSMUSG00000035270 | 60.54871439 | 0.769636544 | 0.332802183 | 2.31259464  | 0.020744936 | 0.076721862 |
| ENSMUSG00000070565 | 3076.643274 | 0.771370091 | 0.156741691 | 4.921282184 | 8.60E-07    | 1.32E-05    |
| ENSMUSG00000022159 | 435.8373926 | 0.77291652  | 0.152453569 | 5.069848648 | 3.98E-07    | 6.52E-06    |
| ENSMUSG00000099746 | 400.2153422 | 0.772950405 | 0.180305066 | 4.286903425 | 1.81E-05    | 0.000203655 |
| ENSMUSG00000052085 | 2004.83878  | 0.773041327 | 0.19707807  | 3.922513174 | 8.76E-05    | 0.000817673 |
| ENSMUSG00000027997 | 4500.18813  | 0.773601586 | 0.123346226 | 6.271789684 | 3.57E-10    | 9.96E-09    |

|                    |             |             |             |             |             |             |
|--------------------|-------------|-------------|-------------|-------------|-------------|-------------|
| ENSMUSG00000009585 | 6208.00364  | 0.774143898 | 0.197449747 | 3.92071355  | 8.83E-05    | 0.000823115 |
| ENSMUSG00000022863 | 184.2966622 | 0.774303546 | 0.192008319 | 4.032656247 | 5.51E-05    | 0.000545168 |
| ENSMUSG00000026278 | 1639.317653 | 0.774336892 | 0.130107389 | 5.951521251 | 2.66E-09    | 6.52E-08    |
| ENSMUSG00000103734 | 228.1487097 | 0.775811953 | 0.190182943 | 4.079293024 | 4.52E-05    | 0.000459161 |
| ENSMUSG00000030670 | 133.7521134 | 0.776454896 | 0.242535225 | 3.201410839 | 0.001367564 | 0.008595841 |
| ENSMUSG00000114622 | 58.39984561 | 0.776765514 | 0.378685731 | 2.051214105 | 0.040246101 | 0.128659446 |
| ENSMUSG00000020577 | 2150.586871 | 0.776807778 | 0.13203536  | 5.883331395 | 4.02E-09    | 9.61E-08    |
| ENSMUSG00000026832 | 324.7493047 | 0.776929602 | 0.256862193 | 3.024694263 | 0.002488846 | 0.014108091 |
| ENSMUSG00000025779 | 134.1864483 | 0.77733604  | 0.237566889 | 3.272072316 | 0.001067623 | 0.007027465 |
| ENSMUSG00000021336 | 3106.57799  | 0.777454764 | 0.22426125  | 3.466736959 | 0.000526817 | 0.003873574 |
| ENSMUSG00000055114 | 3914.309349 | 0.778718063 | 0.17279485  | 4.506604585 | 6.59E-06    | 8.23E-05    |
| ENSMUSG00000025192 | 4732.179933 | 0.779359282 | 0.109454566 | 7.120390774 | 1.08E-12    | 4.19E-11    |
| ENSMUSG00000010911 | 516.7814819 | 0.779900417 | 0.167793374 | 4.647981007 | 3.35E-06    | 4.48E-05    |
| ENSMUSG00000034560 | 3057.578843 | 0.780455341 | 0.126881841 | 6.151040484 | 7.70E-10    | 2.05E-08    |
| ENSMUSG00000016206 | 491.4681871 | 0.780477874 | 0.184101316 | 4.239393231 | 2.24E-05    | 0.00024419  |
| ENSMUSG00000103546 | 171.0468184 | 0.781031345 | 0.246563988 | 3.16766187  | 0.001536701 | 0.00946423  |
| ENSMUSG00000107205 | 50.88569175 | 0.781477002 | 0.362013098 | 2.158698139 | 0.030873593 | 0.104652987 |
| ENSMUSG00000036580 | 2159.512088 | 0.781613202 | 0.116450833 | 6.711958853 | 1.92E-11    | 6.38E-10    |
| ENSMUSG00000029651 | 629.2331251 | 0.782175447 | 0.163461648 | 4.785070108 | 1.71E-06    | 2.46E-05    |
| ENSMUSG00000002058 | 314.376218  | 0.782423321 | 0.16202024  | 4.829170224 | 1.37E-06    | 2.00E-05    |
| ENSMUSG00000065232 | 86.68765476 | 0.783119188 | 0.296616632 | 2.640172881 | 0.008286375 | 0.037415355 |
| ENSMUSG00000065778 | 71.1293831  | 0.783318011 | 0.295909479 | 2.647154172 | 0.008117234 | 0.036778226 |
| ENSMUSG00000021733 | 6075.690486 | 0.783334134 | 0.127731764 | 6.13264948  | 8.64E-10    | 2.28E-08    |
| ENSMUSG00000026395 | 177.3253992 | 0.78470557  | 0.293302775 | 2.675411342 | 0.007463761 | 0.034383255 |
| ENSMUSG00000026222 | 477.166857  | 0.785381843 | 0.237491058 | 3.306995423 | 0.000943024 | 0.006328735 |
| ENSMUSG00000087530 | 174.4088836 | 0.785943653 | 0.223701317 | 3.513361762 | 0.000442475 | 0.003341534 |
| ENSMUSG00000075588 | 109.7874233 | 0.786645695 | 0.270233488 | 2.910985237 | 0.00360291  | 0.018981456 |
| ENSMUSG00000041420 | 354.9378933 | 0.787341244 | 0.175623261 | 4.4831262   | 7.36E-06    | 9.06E-05    |
| ENSMUSG00000111417 | 121.8139939 | 0.787357061 | 0.272945424 | 2.884668477 | 0.00391826  | 0.020302306 |

|                    |             |             |             |             |             |             |
|--------------------|-------------|-------------|-------------|-------------|-------------|-------------|
| ENSMUSG00000020300 | 926.6795453 | 0.787648438 | 0.14794237  | 5.324022022 | 1.01E-07    | 1.90E-06    |
| ENSMUSG00000029166 | 138.8996239 | 0.787703477 | 0.245486803 | 3.208740623 | 0.001333177 | 0.008403386 |
| ENSMUSG00000110079 | 63.02899951 | 0.787761374 | 0.362987192 | 2.1702181   | 0.029990328 | 0.102280822 |
| ENSMUSG00000031438 | 8965.670939 | 0.787967614 | 0.111773258 | 7.0496971   | 1.79E-12    | 6.75E-11    |
| ENSMUSG00000091537 | 6510.499291 | 0.78892141  | 0.124422658 | 6.340657094 | 2.29E-10    | 6.57E-09    |
| ENSMUSG00000110405 | 95.58954653 | 0.789012246 | 0.277984455 | 2.838332255 | 0.004534995 | 0.022891562 |
| ENSMUSG00000071341 | 184.4194126 | 0.789039228 | 0.258277674 | 3.055003614 | 0.002250578 | 0.012972381 |
| ENSMUSG00000060771 | 218.1570709 | 0.789951138 | 0.178043699 | 4.436838487 | 9.13E-06    | 0.000109572 |
| ENSMUSG00000013643 | 52906.41227 | 0.789962179 | 0.114543068 | 6.896638884 | 5.32E-12    | 1.90E-10    |
| ENSMUSG00000064672 | 123.443944  | 0.790306291 | 0.267121199 | 2.958605662 | 0.003090343 | 0.016821512 |
| ENSMUSG00000104235 | 301.302103  | 0.790398109 | 0.184151368 | 4.292110989 | 1.77E-05    | 0.000199871 |
| ENSMUSG00000046808 | 113.2732572 | 0.790772621 | 0.256948201 | 3.077556562 | 0.002087052 | 0.012187314 |
| ENSMUSG00000097855 | 71.15840919 | 0.790816691 | 0.301859943 | 2.619813289 | 0.008797792 | 0.039231756 |
| ENSMUSG00000028980 | 2169.711055 | 0.79121209  | 0.119956178 | 6.595842801 | 4.23E-11    | 1.34E-09    |
| ENSMUSG00000028307 | 26417.24759 | 0.791876702 | 0.141841725 | 5.582819191 | 2.37E-08    | 4.94E-07    |
| ENSMUSG00000086537 | 213.6821266 | 0.792580402 | 0.363128629 | 2.182643667 | 0.029062061 | 0.099878723 |
| ENSMUSG00000109231 | 41.03652768 | 0.79265407  | 0.403622497 | 1.963850071 | 0.049547481 | 0.150130215 |
| ENSMUSG00000104325 | 140.7736191 | 0.792686577 | 0.338746833 | 2.34005605  | 0.019280846 | 0.072387567 |
| ENSMUSG00000091955 | 87.51443829 | 0.793179182 | 0.313671356 | 2.528694973 | 0.011448748 | 0.048227904 |
| ENSMUSG00000108825 | 234.5168787 | 0.794039414 | 0.216932609 | 3.660304542 | 0.000251916 | 0.002042899 |
| ENSMUSG00000111356 | 114.4947337 | 0.794188363 | 0.24543014  | 3.235903957 | 0.001212582 | 0.007775097 |
| ENSMUSG00000102157 | 74.59672034 | 0.794463462 | 0.36005692  | 2.206494079 | 0.027349424 | 0.095384086 |
| ENSMUSG00000107227 | 91.65462719 | 0.794490981 | 0.388245394 | 2.046362926 | 0.040720677 | 0.129767336 |
| ENSMUSG00000061531 | 2373.341444 | 0.794683097 | 0.185151062 | 4.292079606 | 1.77E-05    | 0.000199871 |
| ENSMUSG00000030629 | 3496.834046 | 0.794700011 | 0.121019372 | 6.566717364 | 5.14E-11    | 1.61E-09    |
| ENSMUSG00000104973 | 42.98158452 | 0.794817007 | 0.393516048 | 2.019782954 | 0.043405906 | 0.136043188 |
| ENSMUSG00000071724 | 45.63211621 | 0.794843119 | 0.397450279 | 1.999855479 | 0.045515872 | 0.141116288 |
| ENSMUSG00000027784 | 1391.373375 | 0.795005703 | 0.161679857 | 4.917159875 | 8.78E-07    | 1.34E-05    |
| ENSMUSG00000028179 | 4251.797751 | 0.795194029 | 0.152751167 | 5.205813119 | 1.93E-07    | 3.41E-06    |

|                    |             |             |             |             |             |             |
|--------------------|-------------|-------------|-------------|-------------|-------------|-------------|
| ENSMUSG00000040204 | 4117.723866 | 0.795421261 | 0.131406005 | 6.05315764  | 1.42E-09    | 3.62E-08    |
| ENSMUSG00000026888 | 303.2874731 | 0.795616219 | 0.169193727 | 4.702397862 | 2.57E-06    | 3.54E-05    |
| ENSMUSG00000077323 | 233.7323536 | 0.795645555 | 0.25758541  | 3.088861102 | 0.002009254 | 0.01183273  |
| ENSMUSG00000102283 | 54.17887707 | 0.79673042  | 0.340642711 | 2.338903475 | 0.01934043  | 0.072539342 |
| ENSMUSG00000022244 | 1435.387331 | 0.797104876 | 0.122785109 | 6.491869251 | 8.48E-11    | 2.59E-09    |
| ENSMUSG00000110773 | 75.32544877 | 0.797189663 | 0.360823641 | 2.209360949 | 0.027149545 | 0.094929759 |
| ENSMUSG00000104432 | 77.11991715 | 0.797274844 | 0.284937196 | 2.798072192 | 0.005140862 | 0.025409212 |
| ENSMUSG00000035245 | 1406.896288 | 0.797896831 | 0.125674296 | 6.348926185 | 2.17E-10    | 6.26E-09    |
| ENSMUSG00000058248 | 38.44559312 | 0.799106456 | 0.399369783 | 2.000918672 | 0.045401155 | 0.140883162 |
| ENSMUSG00000040563 | 92.50051702 | 0.799179114 | 0.297988241 | 2.681914929 | 0.007320207 | 0.033840784 |
| ENSMUSG00000062373 | 2126.299325 | 0.799985982 | 0.134030607 | 5.968681311 | 2.39E-09    | 5.93E-08    |
| ENSMUSG00000089901 | 159.7755575 | 0.801162412 | 0.311056331 | 2.575618404 | 0.010006101 | 0.043401779 |
| ENSMUSG00000075010 | 611.2699692 | 0.801231299 | 0.21447075  | 3.735853489 | 0.00018708  | 0.00157913  |
| ENSMUSG00000108650 | 88.58485019 | 0.801272361 | 0.299936108 | 2.67147682  | 0.007551829 | 0.0347028   |
| ENSMUSG00000110442 | 53.84734686 | 0.801444762 | 0.346409659 | 2.3135751   | 0.020691041 | 0.076573527 |
| ENSMUSG00000021416 | 134.6220348 | 0.801714071 | 0.312710773 | 2.563755838 | 0.010354636 | 0.044587513 |
| ENSMUSG00000006435 | 52.37511517 | 0.801911112 | 0.345681955 | 2.319794542 | 0.020351994 | 0.075468877 |
| ENSMUSG00000039217 | 288.2938078 | 0.802252471 | 0.178528997 | 4.493681603 | 7.00E-06    | 8.68E-05    |
| ENSMUSG00000005148 | 48457.69287 | 0.802723492 | 0.097901779 | 8.19927382  | 2.42E-16    | 1.35E-14    |
| ENSMUSG00000042312 | 172.6500134 | 0.803173444 | 0.219013563 | 3.667231527 | 0.000245191 | 0.001998487 |
| ENSMUSG00000113984 | 48.1347531  | 0.804499278 | 0.408686195 | 1.968501229 | 0.049010395 | 0.148939753 |
| ENSMUSG00000102719 | 330.8109935 | 0.804755511 | 0.207639653 | 3.875731335 | 0.000106305 | 0.00096803  |
| ENSMUSG00000055978 | 160.6223679 | 0.805109995 | 0.312723008 | 2.574514742 | 0.010038081 | 0.043518515 |
| ENSMUSG00000006179 | 153.8325868 | 0.805248678 | 0.261038127 | 3.084793353 | 0.002036936 | 0.011947847 |
| ENSMUSG00000008193 | 470.7708567 | 0.805523876 | 0.186427531 | 4.320841843 | 1.55E-05    | 0.000178127 |
| ENSMUSG00000059708 | 264.0107038 | 0.80645567  | 0.203516228 | 3.962611133 | 7.41E-05    | 0.000708444 |
| ENSMUSG00000040329 | 123.037696  | 0.806831327 | 0.334496855 | 2.412074475 | 0.015862041 | 0.06218819  |
| ENSMUSG00000113922 | 46.49859758 | 0.807070804 | 0.363158679 | 2.222364083 | 0.026258711 | 0.092525755 |
| ENSMUSG00000019891 | 4172.829564 | 0.807764882 | 0.108238545 | 7.462820968 | 8.47E-14    | 3.70E-12    |

|                    |             |             |             |             |             |             |
|--------------------|-------------|-------------|-------------|-------------|-------------|-------------|
| ENSMUSG00000037973 | 206.0810266 | 0.809095124 | 0.230405366 | 3.511615802 | 0.000445391 | 0.003356767 |
| ENSMUSG00000025887 | 771.7695837 | 0.810442276 | 0.161206431 | 5.027356971 | 4.97E-07    | 8.00E-06    |
| ENSMUSG00000062638 | 4687.493223 | 0.810578894 | 0.149068924 | 5.437611497 | 5.40E-08    | 1.06E-06    |
| ENSMUSG00000097230 | 63.2166128  | 0.811264094 | 0.301311593 | 2.692442355 | 0.00709308  | 0.03296848  |
| ENSMUSG00000106166 | 159.8083985 | 0.811391559 | 0.230367864 | 3.522156026 | 0.000428052 | 0.003246936 |
| ENSMUSG00000036473 | 985.0372004 | 0.811994092 | 0.170516353 | 4.761971958 | 1.92E-06    | 2.72E-05    |
| ENSMUSG00000044067 | 228.4863595 | 0.81220873  | 0.332703703 | 2.441237424 | 0.014637028 | 0.058477314 |
| ENSMUSG00000105804 | 343.926677  | 0.812451098 | 0.213542215 | 3.804639274 | 0.000142011 | 0.001241956 |
| ENSMUSG00000030068 | 550.1878143 | 0.81251537  | 0.212573386 | 3.822281738 | 0.000132222 | 0.001166414 |
| ENSMUSG00000078784 | 1800.276285 | 0.813945519 | 0.13810686  | 5.893592232 | 3.78E-09    | 9.11E-08    |
| ENSMUSG00000041476 | 189.3363808 | 0.814164582 | 0.223376764 | 3.644804273 | 0.000267595 | 0.002155162 |
| ENSMUSG00000024105 | 517.4727087 | 0.815090376 | 0.206976241 | 3.93808668  | 8.21E-05    | 0.00077403  |
| ENSMUSG00000022636 | 3549.196429 | 0.815270466 | 0.11678071  | 6.981208321 | 2.93E-12    | 1.08E-10    |
| ENSMUSG00000001627 | 9399.071464 | 0.815514506 | 0.167096184 | 4.880509445 | 1.06E-06    | 1.58E-05    |
| ENSMUSG00000028518 | 2009.736667 | 0.816748679 | 0.115140329 | 7.093506549 | 1.31E-12    | 5.02E-11    |
| ENSMUSG00000095865 | 162.0131526 | 0.81679441  | 0.245198775 | 3.33115208  | 0.000864873 | 0.00590194  |
| ENSMUSG00000029869 | 56.19711459 | 0.817255622 | 0.416448107 | 1.962442879 | 0.049710945 | 0.15049854  |
| ENSMUSG00000046727 | 8591.842875 | 0.817615976 | 0.11218336  | 7.288210825 | 3.14E-13    | 1.27E-11    |
| ENSMUSG00000105933 | 192.4789599 | 0.817898194 | 0.216662925 | 3.774979927 | 0.000160021 | 0.00137572  |
| ENSMUSG00000103133 | 67.69987717 | 0.818919888 | 0.306296088 | 2.673621767 | 0.007503703 | 0.034524464 |
| ENSMUSG00000110238 | 77.84028326 | 0.819493097 | 0.290969435 | 2.816423301 | 0.004856164 | 0.024254716 |
| ENSMUSG00000003283 | 1381.402099 | 0.819963078 | 0.181126887 | 4.527009163 | 5.98E-06    | 7.55E-05    |
| ENSMUSG00000081487 | 78.85943356 | 0.820390524 | 0.275103505 | 2.982115853 | 0.002862636 | 0.015829322 |
| ENSMUSG00000019845 | 1076.612753 | 0.820473021 | 0.124868082 | 6.57071856  | 5.01E-11    | 1.57E-09    |
| ENSMUSG00000048022 | 109.0569437 | 0.820687211 | 0.32901745  | 2.4943577   | 0.012618531 | 0.051889823 |
| ENSMUSG00000026986 | 122.6475956 | 0.820894891 | 0.241599987 | 3.397743941 | 0.00067944  | 0.004798033 |
| ENSMUSG00000005413 | 79.05498126 | 0.822553198 | 0.282218134 | 2.9146008   | 0.003561438 | 0.018816305 |
| ENSMUSG00000060063 | 367.3668196 | 0.822572434 | 0.235792799 | 3.488539251 | 0.000485668 | 0.003617525 |
| ENSMUSG00000112102 | 78.8714082  | 0.823457716 | 0.296766831 | 2.774763311 | 0.00552419  | 0.026921974 |

|                    |             |             |             |             |             |             |
|--------------------|-------------|-------------|-------------|-------------|-------------|-------------|
| ENSMUSG00000079523 | 11244.23495 | 0.823459409 | 0.19907888  | 4.136347405 | 3.53E-05    | 0.000366365 |
| ENSMUSG00000039031 | 4916.381787 | 0.82403432  | 0.157858602 | 5.220078651 | 1.79E-07    | 3.19E-06    |
| ENSMUSG00000034731 | 161.7113261 | 0.824153501 | 0.281967114 | 2.922870997 | 0.003468202 | 0.018441671 |
| ENSMUSG00000096971 | 114.9708624 | 0.824384669 | 0.240244442 | 3.431441173 | 0.000600383 | 0.004325485 |
| ENSMUSG00000029153 | 9286.322197 | 0.825033955 | 0.121760194 | 6.775892224 | 1.24E-11    | 4.21E-10    |
| ENSMUSG00000077711 | 119.8387363 | 0.825292807 | 0.296833438 | 2.780322905 | 0.005430487 | 0.026540798 |
| ENSMUSG00000030834 | 4407.432494 | 0.826234287 | 0.17919313  | 4.61085916  | 4.01E-06    | 5.30E-05    |
| ENSMUSG00000032053 | 39.23823565 | 0.826312799 | 0.417961523 | 1.977006863 | 0.048040854 | 0.146781627 |
| ENSMUSG00000073002 | 58.08760044 | 0.828437922 | 0.366072666 | 2.263042284 | 0.023633083 | 0.085130251 |
| ENSMUSG00000097036 | 33.49014039 | 0.828542959 | 0.421026772 | 1.967910389 | 0.049078349 | 0.14909362  |
| ENSMUSG00000108741 | 120.7066865 | 0.829361815 | 0.249883682 | 3.318991494 | 0.000903432 | 0.006121979 |
| ENSMUSG00000097081 | 43.5287454  | 0.829605788 | 0.366349737 | 2.264518585 | 0.023542238 | 0.084871557 |
| ENSMUSG00000023019 | 8076.206397 | 0.829637003 | 0.123233542 | 6.732233687 | 1.67E-11    | 5.61E-10    |
| ENSMUSG00000029016 | 758.993561  | 0.830318818 | 0.143184896 | 5.798927389 | 6.67E-09    | 1.54E-07    |
| ENSMUSG00000061981 | 2267.503878 | 0.830345602 | 0.13004792  | 6.384920282 | 1.71E-10    | 5.03E-09    |
| ENSMUSG00000058921 | 446.9055906 | 0.830573811 | 0.205353505 | 4.044604991 | 5.24E-05    | 0.000522965 |
| ENSMUSG00000019737 | 1250.303951 | 0.830602163 | 0.208599233 | 3.981808324 | 6.84E-05    | 0.000661418 |
| ENSMUSG00000029919 | 151.7475455 | 0.830789982 | 0.243402187 | 3.413239597 | 0.000641955 | 0.004576801 |
| ENSMUSG00000081399 | 57.49684026 | 0.832038348 | 0.31971881  | 2.602406618 | 0.009257202 | 0.040823584 |
| ENSMUSG00000050064 | 549.8724302 | 0.832060516 | 0.147817545 | 5.628969911 | 1.81E-08    | 3.86E-07    |
| ENSMUSG00000052912 | 167.1996238 | 0.832071337 | 0.24455301  | 3.402417071 | 0.000667926 | 0.004732405 |
| ENSMUSG00000027134 | 554.3380247 | 0.83228292  | 0.178427248 | 4.664550563 | 3.09E-06    | 4.18E-05    |
| ENSMUSG00000093793 | 145.8197309 | 0.832978777 | 0.251114433 | 3.317128235 | 0.000909479 | 0.006158106 |
| ENSMUSG00000061740 | 92.31604851 | 0.833731538 | 0.404754557 | 2.059844724 | 0.039413387 | 0.126687511 |
| ENSMUSG00000072235 | 816.4910191 | 0.833791108 | 0.169127578 | 4.92995359  | 8.22E-07    | 1.26E-05    |
| ENSMUSG00000039100 | 7895.583801 | 0.833891224 | 0.229370645 | 3.6355621   | 0.000277375 | 0.002225888 |
| ENSMUSG00000103162 | 83.79434497 | 0.834045864 | 0.29325375  | 2.844109802 | 0.00445357  | 0.022541775 |
| ENSMUSG00000034903 | 2997.530639 | 0.835888254 | 0.139837266 | 5.977578651 | 2.26E-09    | 5.63E-08    |
| ENSMUSG00000028214 | 484.9465319 | 0.836165332 | 0.226986254 | 3.683770795 | 0.000229809 | 0.001891671 |

|                    |             |             |             |             |             |             |
|--------------------|-------------|-------------|-------------|-------------|-------------|-------------|
| ENSMUSG00000093880 | 272.5367964 | 0.836182954 | 0.230124003 | 3.633619012 | 0.000279473 | 0.002240114 |
| ENSMUSG00000021792 | 1286.781527 | 0.836336619 | 0.241577741 | 3.461977153 | 0.000536223 | 0.003924615 |
| ENSMUSG00000026102 | 496.1015139 | 0.836964153 | 0.176798559 | 4.733998715 | 2.20E-06    | 3.07E-05    |
| ENSMUSG00000113775 | 139.8930999 | 0.837099662 | 0.30464555  | 2.747782339 | 0.005999983 | 0.028725979 |
| ENSMUSG00000104039 | 97.05863406 | 0.837111996 | 0.270206245 | 3.098048293 | 0.001947997 | 0.01153539  |
| ENSMUSG00000072972 | 190.3891954 | 0.837558588 | 0.216765725 | 3.863888477 | 0.000111596 | 0.001007982 |
| ENSMUSG00000089417 | 5322.007996 | 0.83798693  | 0.13253973  | 6.322533836 | 2.57E-10    | 7.31E-09    |
| ENSMUSG00000111264 | 149.9771636 | 0.838629176 | 0.210009331 | 3.993294829 | 6.52E-05    | 0.000634293 |
| ENSMUSG00000114524 | 131.8795456 | 0.840295712 | 0.252329065 | 3.330158234 | 0.000867966 | 0.005917615 |
| ENSMUSG00000038415 | 2421.718643 | 0.840474361 | 0.135237642 | 6.214796036 | 5.14E-10    | 1.40E-08    |
| ENSMUSG00000097222 | 1795.252282 | 0.840684109 | 0.126704061 | 6.635021054 | 3.24E-11    | 1.05E-09    |
| ENSMUSG00000022575 | 2882.244814 | 0.840729119 | 0.151610749 | 5.545313415 | 2.93E-08    | 5.98E-07    |
| ENSMUSG00000041134 | 1193.725285 | 0.840931866 | 0.145515357 | 5.778990519 | 7.52E-09    | 1.72E-07    |
| ENSMUSG00000087159 | 63.31071346 | 0.842662806 | 0.317874194 | 2.650931788 | 0.008027005 | 0.036443453 |
| ENSMUSG00000051439 | 1222.856771 | 0.8439455   | 0.187571906 | 4.499317194 | 6.82E-06    | 8.48E-05    |
| ENSMUSG00000007038 | 2236.609305 | 0.84442821  | 0.128591309 | 6.566759586 | 5.14E-11    | 1.61E-09    |
| ENSMUSG00000104969 | 175.8418428 | 0.845267952 | 0.232377243 | 3.637481621 | 0.000275317 | 0.002211973 |
| ENSMUSG00000106341 | 75.64950058 | 0.845270631 | 0.323122742 | 2.615942862 | 0.008898145 | 0.039568798 |
| ENSMUSG00000021280 | 1021.999804 | 0.847601612 | 0.21044281  | 4.027705257 | 5.63E-05    | 0.000555787 |
| ENSMUSG00000025969 | 156.9819698 | 0.847895729 | 0.388258527 | 2.183843164 | 0.028973775 | 0.099652089 |
| ENSMUSG00000111425 | 71.81472126 | 0.848238005 | 0.353533009 | 2.399317697 | 0.016425657 | 0.063833726 |
| ENSMUSG00000020226 | 152.0973758 | 0.849227304 | 0.353986903 | 2.399035942 | 0.016438301 | 0.063843705 |
| ENSMUSG00000033355 | 221.8115958 | 0.850331919 | 0.207563228 | 4.096736813 | 4.19E-05    | 0.000427859 |
| ENSMUSG00000103432 | 119.055282  | 0.850557977 | 0.275020871 | 3.092703384 | 0.001983423 | 0.011707952 |
| ENSMUSG00000048911 | 197.3297995 | 0.850638761 | 0.23937761  | 3.553543547 | 0.000380078 | 0.002932915 |
| ENSMUSG00000074093 | 1567.291581 | 0.850760056 | 0.151879475 | 5.60154724  | 2.12E-08    | 4.48E-07    |
| ENSMUSG00000020847 | 5412.802422 | 0.8508331   | 0.127504839 | 6.672947514 | 2.51E-11    | 8.20E-10    |
| ENSMUSG00000043760 | 161.2118838 | 0.851419525 | 0.2855549   | 2.981631644 | 0.002867167 | 0.015846518 |
| ENSMUSG00000038665 | 509.4291722 | 0.852543847 | 0.224001315 | 3.80597698  | 0.000141246 | 0.001237202 |



|                    |             |             |             |             |             |             |
|--------------------|-------------|-------------|-------------|-------------|-------------|-------------|
| ENSMUSG00000079445 | 377.6953029 | 0.852670532 | 0.243104631 | 3.507421998 | 0.000452471 | 0.00340552  |
| ENSMUSG00000107364 | 90.98053874 | 0.852869689 | 0.26658044  | 3.199295825 | 0.001377637 | 0.008639676 |
| ENSMUSG00000065208 | 128.1819969 | 0.853030831 | 0.253551875 | 3.364324686 | 0.000767312 | 0.005304349 |
| ENSMUSG00000103132 | 170.8199449 | 0.853083056 | 0.310294254 | 2.7492712   | 0.005972795 | 0.028620389 |
| ENSMUSG00000054676 | 813.1243947 | 0.853305129 | 0.14329167  | 5.955022573 | 2.60E-09    | 6.39E-08    |
| ENSMUSG00000104315 | 159.1239572 | 0.853524002 | 0.235105341 | 3.630389679 | 0.000282994 | 0.002266897 |
| ENSMUSG00000059325 | 7781.606869 | 0.854420226 | 0.10661981  | 8.01370987  | 1.11E-15    | 5.97E-14    |
| ENSMUSG00000111340 | 76.64679507 | 0.854427836 | 0.419517895 | 2.036689842 | 0.041681133 | 0.13212259  |
| ENSMUSG00000108238 | 393.3587075 | 0.855308192 | 0.21784801  | 3.926169401 | 8.63E-05    | 0.000808733 |
| ENSMUSG00000110635 | 121.1410876 | 0.855559422 | 0.242522747 | 3.527749185 | 0.000419109 | 0.00319149  |
| ENSMUSG00000104449 | 34.31155406 | 0.856119199 | 0.402442837 | 2.127306342 | 0.033394638 | 0.111383245 |
| ENSMUSG00000105656 | 145.4227191 | 0.856350764 | 0.243505225 | 3.516765466 | 0.00043684  | 0.003309293 |
| ENSMUSG00000043079 | 589.1061028 | 0.856983931 | 0.263750632 | 3.249220392 | 0.001157218 | 0.007493355 |
| ENSMUSG00000102565 | 55.46732063 | 0.857628067 | 0.350902337 | 2.444064848 | 0.014522816 | 0.05813558  |
| ENSMUSG00000037211 | 1770.236777 | 0.860364073 | 0.155694079 | 5.525990956 | 3.28E-08    | 6.64E-07    |
| ENSMUSG00000027699 | 9150.891928 | 0.860423223 | 0.139580907 | 6.164333217 | 7.08E-10    | 1.89E-08    |
| ENSMUSG00000103373 | 416.4185519 | 0.860674721 | 0.166190383 | 5.178847936 | 2.23E-07    | 3.89E-06    |
| ENSMUSG00000114576 | 480.0953389 | 0.860730954 | 0.172324466 | 4.994827341 | 5.89E-07    | 9.26E-06    |
| ENSMUSG00000038936 | 582.2860846 | 0.861300248 | 0.138155743 | 6.234270316 | 4.54E-10    | 1.25E-08    |
| ENSMUSG00000100313 | 44.37111517 | 0.861338331 | 0.380586406 | 2.26318733  | 0.023624144 | 0.085125551 |
| ENSMUSG00000020377 | 197.7194829 | 0.862359459 | 0.234170268 | 3.682617211 | 0.000230852 | 0.001896913 |
| ENSMUSG00000001248 | 2457.148572 | 0.86259586  | 0.207346813 | 4.160159724 | 3.18E-05    | 0.000334069 |
| ENSMUSG00000019843 | 1083.17028  | 0.862850031 | 0.154853147 | 5.57205358  | 2.52E-08    | 5.22E-07    |
| ENSMUSG00000071547 | 817.4574786 | 0.863563999 | 0.13662013  | 6.320913293 | 2.60E-10    | 7.37E-09    |
| ENSMUSG00000107155 | 44.92869615 | 0.863983856 | 0.363247877 | 2.378496644 | 0.017383395 | 0.066747089 |
| ENSMUSG00000112254 | 70.82342367 | 0.86402002  | 0.303497087 | 2.846880768 | 0.004414989 | 0.02238206  |
| ENSMUSG00000113752 | 215.3902081 | 0.865763916 | 0.197964479 | 4.373329611 | 1.22E-05    | 0.000143023 |
| ENSMUSG00000102833 | 73.35960225 | 0.865786809 | 0.293715468 | 2.947705865 | 0.003201415 | 0.017303625 |
| ENSMUSG00000046159 | 1738.342831 | 0.865926961 | 0.16636248  | 5.205061641 | 1.94E-07    | 3.42E-06    |

|                    |             |             |             |             |             |             |
|--------------------|-------------|-------------|-------------|-------------|-------------|-------------|
| ENSMUSG00000087176 | 45.36690644 | 0.86594044  | 0.375300122 | 2.30732789  | 0.021036548 | 0.077555968 |
| ENSMUSG00000022064 | 2040.536195 | 0.867006877 | 0.142658622 | 6.077493723 | 1.22E-09    | 3.14E-08    |
| ENSMUSG00000104706 | 123.6126967 | 0.867389155 | 0.255957789 | 3.388797662 | 0.000701998 | 0.004930789 |
| ENSMUSG00000086813 | 266.4421751 | 0.867636036 | 0.245824174 | 3.529498436 | 0.000416348 | 0.003174352 |
| ENSMUSG00000111709 | 155.796654  | 0.868159456 | 0.329698854 | 2.633189186 | 0.008458722 | 0.038016516 |
| ENSMUSG00000029463 | 504.7541379 | 0.86835457  | 0.151076473 | 5.747781582 | 9.04E-09    | 2.04E-07    |
| ENSMUSG00000029772 | 19335.93772 | 0.868556672 | 0.127052245 | 6.83621665  | 8.13E-12    | 2.83E-10    |
| ENSMUSG00000022615 | 136.1718999 | 0.869029729 | 0.298132439 | 2.914911682 | 0.003557892 | 0.018806483 |
| ENSMUSG00000095690 | 43.98190119 | 0.869429904 | 0.389021719 | 2.23491353  | 0.025423026 | 0.09019633  |
| ENSMUSG00000024479 | 3747.997655 | 0.869591469 | 0.11641938  | 7.46947347  | 8.05E-14    | 3.52E-12    |
| ENSMUSG00000109314 | 1278.828808 | 0.869848921 | 0.165101922 | 5.26855721  | 1.38E-07    | 2.51E-06    |
| ENSMUSG00000086944 | 38.84004236 | 0.870626289 | 0.402437941 | 2.163380239 | 0.030511946 | 0.103647664 |
| ENSMUSG00000102363 | 47.15056826 | 0.870695026 | 0.343704465 | 2.533266557 | 0.011300498 | 0.04774771  |
| ENSMUSG00000061758 | 830.1133397 | 0.871213738 | 0.143295858 | 6.079824974 | 1.20E-09    | 3.09E-08    |
| ENSMUSG00000110142 | 45.14130604 | 0.873836018 | 0.412536894 | 2.118200896 | 0.034158057 | 0.113323243 |
| ENSMUSG00000080316 | 84.41324386 | 0.873893427 | 0.274533952 | 3.183188896 | 0.001456626 | 0.009053569 |
| ENSMUSG00000107841 | 46.48151296 | 0.874151239 | 0.395443993 | 2.210556372 | 0.027066573 | 0.094773377 |
| ENSMUSG00000107976 | 64.95618103 | 0.874231547 | 0.320016695 | 2.731831061 | 0.006298343 | 0.029916793 |
| ENSMUSG00000107050 | 78.11118596 | 0.874323339 | 0.31453874  | 2.779700014 | 0.005440914 | 0.026580025 |
| ENSMUSG00000080712 | 288.5587554 | 0.874795058 | 0.217480551 | 4.022405923 | 5.76E-05    | 0.00056719  |
| ENSMUSG00000064925 | 39.52951755 | 0.874878054 | 0.428657697 | 2.040971293 | 0.041253681 | 0.131119056 |
| ENSMUSG00000074024 | 1807.418928 | 0.874971193 | 0.11965146  | 7.312666274 | 2.62E-13    | 1.07E-11    |
| ENSMUSG00000043068 | 83.91253148 | 0.875812761 | 0.296334405 | 2.955487939 | 0.003121749 | 0.016959348 |
| ENSMUSG00000022763 | 454.3816069 | 0.875849887 | 0.156852239 | 5.583917037 | 2.35E-08    | 4.91E-07    |
| ENSMUSG00000051043 | 322.9439436 | 0.876045824 | 0.196792805 | 4.451615121 | 8.52E-06    | 0.000103128 |
| ENSMUSG00000037627 | 369.2435648 | 0.876302164 | 0.246612805 | 3.553352245 | 0.000380355 | 0.002933901 |
| ENSMUSG00000112449 | 48.91375478 | 0.876897671 | 0.365096184 | 2.401826448 | 0.016313446 | 0.063524735 |
| ENSMUSG00000113841 | 29.30463996 | 0.877120493 | 0.43429475  | 2.019643325 | 0.043420398 | 0.136057087 |
| ENSMUSG00000022747 | 3034.85822  | 0.878333055 | 0.104111712 | 8.436448083 | 3.27E-17    | 2.06E-15    |

|                    |             |             |             |             |             |             |
|--------------------|-------------|-------------|-------------|-------------|-------------|-------------|
| ENSMUSG00000072571 | 805.815365  | 0.879931013 | 0.147345697 | 5.971881318 | 2.35E-09    | 5.82E-08    |
| ENSMUSG00000003355 | 368.3775069 | 0.879949333 | 0.231708829 | 3.797651293 | 0.000146074 | 0.001271006 |
| ENSMUSG00000115576 | 36.31850043 | 0.880020762 | 0.423839495 | 2.076306651 | 0.037865599 | 0.122720638 |
| ENSMUSG00000061731 | 4384.253837 | 0.880374536 | 0.119436797 | 7.371049419 | 1.69E-13    | 7.04E-12    |
| ENSMUSG00000038217 | 225.6515608 | 0.880380201 | 0.247765978 | 3.553273165 | 0.000380469 | 0.002933901 |
| ENSMUSG00000110068 | 126.5230801 | 0.880403962 | 0.272117024 | 3.235387288 | 0.001214778 | 0.007784705 |
| ENSMUSG00000023045 | 2328.280621 | 0.880924613 | 0.122378865 | 7.198339434 | 6.10E-13    | 2.44E-11    |
| ENSMUSG00000060227 | 1095.227312 | 0.881150442 | 0.163461456 | 5.390570127 | 7.02E-08    | 1.36E-06    |
| ENSMUSG00000026893 | 1136.406702 | 0.881164702 | 0.132007639 | 6.675103851 | 2.47E-11    | 8.10E-10    |
| ENSMUSG00000037493 | 365.1477212 | 0.881261374 | 0.244246779 | 3.608077772 | 0.000308474 | 0.002446401 |
| ENSMUSG00000019850 | 3988.641243 | 0.882670672 | 0.165592938 | 5.330364234 | 9.80E-08    | 1.84E-06    |
| ENSMUSG00000053164 | 136.0917904 | 0.882705561 | 0.251222546 | 3.513639904 | 0.000442012 | 0.003340794 |
| ENSMUSG00000060935 | 710.9401936 | 0.884650042 | 0.158560491 | 5.579258968 | 2.42E-08    | 5.03E-07    |
| ENSMUSG00000065637 | 144.7673038 | 0.885399167 | 0.219072185 | 4.041586416 | 5.31E-05    | 0.000528562 |
| ENSMUSG00000106751 | 44.59847992 | 0.885703316 | 0.396056206 | 2.236307129 | 0.02533166  | 0.08997073  |
| ENSMUSG00000094382 | 50.00453698 | 0.886616446 | 0.395970461 | 2.23909744  | 0.025149577 | 0.089465738 |
| ENSMUSG00000030088 | 4674.784968 | 0.886753539 | 0.125497203 | 7.06592275  | 1.60E-12    | 6.03E-11    |
| ENSMUSG00000108137 | 47.76615635 | 0.886759548 | 0.354271273 | 2.503052368 | 0.012312732 | 0.050924749 |
| ENSMUSG00000093908 | 70.50827415 | 0.887935079 | 0.343463297 | 2.585240073 | 0.009731121 | 0.042469042 |
| ENSMUSG00000105137 | 87.16262307 | 0.889914499 | 0.310533357 | 2.86576137  | 0.004160077 | 0.021381396 |
| ENSMUSG00000031558 | 2870.593609 | 0.890794373 | 0.166084003 | 5.363517009 | 8.16E-08    | 1.57E-06    |
| ENSMUSG00000064655 | 76.48431824 | 0.890849891 | 0.281737514 | 3.161985343 | 0.001566975 | 0.009629402 |
| ENSMUSG00000094530 | 70.90738166 | 0.890865246 | 0.320020961 | 2.783771548 | 0.005373086 | 0.026328668 |
| ENSMUSG00000060181 | 611.0663166 | 0.890879984 | 0.184643175 | 4.824873609 | 1.40E-06    | 2.04E-05    |
| ENSMUSG00000069456 | 192.6653232 | 0.89152879  | 0.263305135 | 3.385914938 | 0.000709414 | 0.004976607 |
| ENSMUSG00000102919 | 78.42727624 | 0.89294669  | 0.279937296 | 3.189809659 | 0.001423665 | 0.008883369 |
| ENSMUSG00000020275 | 1096.775455 | 0.8959524   | 0.155769732 | 5.751774689 | 8.83E-09    | 2.00E-07    |
| ENSMUSG00000085776 | 39.09653393 | 0.896321396 | 0.412366763 | 2.173602424 | 0.029735006 | 0.101596503 |
| ENSMUSG00000093514 | 233.0553124 | 0.896433726 | 0.18867179  | 4.751286491 | 2.02E-06    | 2.85E-05    |

|                    |             |             |             |             |             |             |
|--------------------|-------------|-------------|-------------|-------------|-------------|-------------|
| ENSMUSG00000088252 | 73.82458172 | 0.897014076 | 0.343176216 | 2.613858518 | 0.00895261  | 0.039755507 |
| ENSMUSG00000104925 | 58.29622084 | 0.897065328 | 0.326761797 | 2.745318873 | 0.006045213 | 0.028886851 |
| ENSMUSG00000078650 | 146.124179  | 0.897109351 | 0.372801854 | 2.406397237 | 0.016110736 | 0.062943494 |
| ENSMUSG00000027200 | 3760.474917 | 0.897133295 | 0.146453093 | 6.125738128 | 9.03E-10    | 2.37E-08    |
| ENSMUSG00000091514 | 41.64369796 | 0.897380998 | 0.371062339 | 2.418410344 | 0.015588487 | 0.061376914 |
| ENSMUSG00000108214 | 348.9089945 | 0.898050067 | 0.184968959 | 4.855139322 | 1.20E-06    | 1.78E-05    |
| ENSMUSG00000022900 | 495.5956149 | 0.898397139 | 0.182860339 | 4.913023478 | 8.97E-07    | 1.37E-05    |
| ENSMUSG00000065196 | 94.19782596 | 0.899154525 | 0.298388974 | 3.013363777 | 0.00258369  | 0.014561251 |
| ENSMUSG00000011148 | 125.8641584 | 0.899377842 | 0.287283438 | 3.130628934 | 0.001744324 | 0.010510719 |
| ENSMUSG00000109118 | 77.78375966 | 0.899635795 | 0.304303109 | 2.956380553 | 0.003112728 | 0.016921321 |
| ENSMUSG00000031584 | 12733.08912 | 0.899901011 | 0.167792286 | 5.363184642 | 8.18E-08    | 1.57E-06    |
| ENSMUSG00000060586 | 15202.18633 | 0.899934428 | 0.436214957 | 2.06305266  | 0.039107625 | 0.12595886  |
| ENSMUSG00000086847 | 47.91475237 | 0.900264257 | 0.381210076 | 2.361596174 | 0.018196451 | 0.069178156 |
| ENSMUSG00000035429 | 2919.593691 | 0.9005816   | 0.195885496 | 4.597489962 | 4.28E-06    | 5.62E-05    |
| ENSMUSG00000070427 | 458.3639008 | 0.900598498 | 0.142160148 | 6.335098198 | 2.37E-10    | 6.80E-09    |
| ENSMUSG00000109852 | 82.23227321 | 0.900696607 | 0.331086917 | 2.720423432 | 0.006519837 | 0.030765739 |
| ENSMUSG00000030263 | 1100.974597 | 0.901771378 | 0.228890493 | 3.93975025  | 8.16E-05    | 0.00076979  |
| ENSMUSG00000112090 | 33.71169472 | 0.903475151 | 0.406647729 | 2.221763669 | 0.026299281 | 0.092624806 |
| ENSMUSG00000023032 | 226.3147421 | 0.904992272 | 0.186094395 | 4.863081826 | 1.16E-06    | 1.72E-05    |
| ENSMUSG00000034449 | 4022.349592 | 0.905634536 | 0.141123783 | 6.417306272 | 1.39E-10    | 4.12E-09    |
| ENSMUSG00000021139 | 102.4271373 | 0.906542199 | 0.285071603 | 3.180050866 | 0.001472492 | 0.009138517 |
| ENSMUSG00000108961 | 156.6120044 | 0.906770937 | 0.242273955 | 3.742750378 | 0.000182017 | 0.001541064 |
| ENSMUSG00000046157 | 864.285754  | 0.907015894 | 0.117791644 | 7.700171818 | 1.36E-14    | 6.52E-13    |
| ENSMUSG00000041845 | 180.4719199 | 0.907152111 | 0.232459858 | 3.902403273 | 9.52E-05    | 0.000879867 |
| ENSMUSG00000114267 | 98.62974736 | 0.907617396 | 0.294794224 | 3.078816753 | 0.002078245 | 0.012149619 |
| ENSMUSG00000105084 | 61.01734813 | 0.908183352 | 0.335542577 | 2.706611363 | 0.006797378 | 0.031881753 |
| ENSMUSG00000000489 | 84.68492005 | 0.909499695 | 0.406697738 | 2.236303795 | 0.025331878 | 0.08997073  |
| ENSMUSG00000057596 | 486.7837793 | 0.909704585 | 0.237793277 | 3.82561103  | 0.000130448 | 0.001154872 |
| ENSMUSG00000086607 | 89.3258021  | 0.910102448 | 0.352941936 | 2.578618053 | 0.00991964  | 0.043113991 |

|                    |             |             |             |             |             |             |
|--------------------|-------------|-------------|-------------|-------------|-------------|-------------|
| ENSMUSG00000111003 | 36.22786538 | 0.910900317 | 0.42890543  | 2.123778936 | 0.033688633 | 0.112082681 |
| ENSMUSG00000040253 | 472.0303021 | 0.911183759 | 0.215539385 | 4.227458288 | 2.36E-05    | 0.000256218 |
| ENSMUSG00000052102 | 874.0367513 | 0.911432135 | 0.149876286 | 6.08122978  | 1.19E-09    | 3.08E-08    |
| ENSMUSG00000027995 | 666.2624441 | 0.911666626 | 0.178220248 | 5.115393101 | 3.13E-07    | 5.28E-06    |
| ENSMUSG00000097375 | 406.5011722 | 0.912127692 | 0.183810897 | 4.962315659 | 6.97E-07    | 1.08E-05    |
| ENSMUSG00000025656 | 114.8061735 | 0.912165433 | 0.274424978 | 3.323915481 | 0.000887631 | 0.006031401 |
| ENSMUSG00000087022 | 40.11565926 | 0.912204815 | 0.396584691 | 2.300151358 | 0.021439647 | 0.078794588 |
| ENSMUSG00000082315 | 62.74388019 | 0.913192542 | 0.35075691  | 2.603491239 | 0.009227963 | 0.040710741 |
| ENSMUSG00000114613 | 74.32517283 | 0.91407063  | 0.315539299 | 2.896851943 | 0.003769276 | 0.019662836 |
| ENSMUSG00000090582 | 368.2709865 | 0.914980876 | 0.203593647 | 4.4941524   | 6.98E-06    | 8.67E-05    |
| ENSMUSG00000027499 | 127.7151941 | 0.915107129 | 0.310340098 | 2.948723466 | 0.003190894 | 0.017259306 |
| ENSMUSG00000107165 | 68.26201988 | 0.915533994 | 0.326324843 | 2.805590849 | 0.005022442 | 0.024912251 |
| ENSMUSG00000019055 | 233.288121  | 0.915535809 | 0.213472253 | 4.288781305 | 1.80E-05    | 0.000202349 |
| ENSMUSG00000028339 | 173.71497   | 0.91641207  | 0.291503793 | 3.143739786 | 0.001668037 | 0.01014423  |
| ENSMUSG00000034584 | 6593.129024 | 0.917252209 | 0.113799179 | 8.060270905 | 7.61E-16    | 4.12E-14    |
| ENSMUSG00000064344 | 40.32192327 | 0.917934152 | 0.415708896 | 2.208117651 | 0.027236073 | 0.095142804 |
| ENSMUSG00000075463 | 152.262494  | 0.918142274 | 0.212802941 | 4.314518732 | 1.60E-05    | 0.000182739 |
| ENSMUSG00000096967 | 112.2369696 | 0.919345776 | 0.315560782 | 2.913371462 | 0.00357549  | 0.018868198 |
| ENSMUSG00000093979 | 339.3501017 | 0.920205644 | 0.274771641 | 3.34898332  | 0.000811087 | 0.005570695 |
| ENSMUSG00000106099 | 272.0787083 | 0.920851794 | 0.212621451 | 4.330944917 | 1.48E-05    | 0.000170849 |
| ENSMUSG00000032740 | 57.41681522 | 0.921464587 | 0.385959217 | 2.387466202 | 0.016964963 | 0.065455991 |
| ENSMUSG00000104044 | 83.99861616 | 0.922341202 | 0.280753271 | 3.285237605 | 0.001018964 | 0.00674901  |
| ENSMUSG00000027690 | 732.9631066 | 0.922442057 | 0.22128649  | 4.168542139 | 3.07E-05    | 0.00032339  |
| ENSMUSG00000021061 | 177.5158527 | 0.922975236 | 0.263359156 | 3.504625579 | 0.00045725  | 0.003433377 |
| ENSMUSG00000098183 | 40.17015693 | 0.923664209 | 0.37486665  | 2.463980753 | 0.013740349 | 0.055672878 |
| ENSMUSG00000105561 | 229.0232081 | 0.923728361 | 0.20417916  | 4.524106964 | 6.07E-06    | 7.64E-05    |
| ENSMUSG00000051817 | 983.9419092 | 0.923990283 | 0.146646132 | 6.300815916 | 2.96E-10    | 8.36E-09    |
| ENSMUSG00000032076 | 113.5673576 | 0.924063623 | 0.257272235 | 3.591773604 | 0.000328435 | 0.002581752 |
| ENSMUSG00000027797 | 2358.90231  | 0.924072363 | 0.215795834 | 4.282160341 | 1.85E-05    | 0.000207107 |

|                    |             |             |             |             |             |             |
|--------------------|-------------|-------------|-------------|-------------|-------------|-------------|
| ENSMUSG00000095676 | 69.51554384 | 0.924104512 | 0.346231844 | 2.669033851 | 0.007606978 | 0.034917072 |
| ENSMUSG00000111833 | 114.1774072 | 0.924398392 | 0.239170636 | 3.865016233 | 0.000111082 | 0.001003742 |
| ENSMUSG00000111664 | 28.90303188 | 0.924612092 | 0.446811091 | 2.06935797  | 0.038512508 | 0.124420392 |
| ENSMUSG00000094840 | 3499.578157 | 0.92498758  | 0.363639028 | 2.543697204 | 0.010968612 | 0.046654782 |
| ENSMUSG00000092247 | 214.5260684 | 0.925969553 | 0.189325679 | 4.890881987 | 1.00E-06    | 1.51E-05    |
| ENSMUSG00000073664 | 5420.054137 | 0.926232945 | 0.119588185 | 7.745187729 | 9.54E-15    | 4.68E-13    |
| ENSMUSG00000103693 | 81.32290393 | 0.926727291 | 0.276471493 | 3.351981362 | 0.000802354 | 0.005512416 |
| ENSMUSG00000040187 | 316.729261  | 0.926733895 | 0.25081911  | 3.694829696 | 0.000220034 | 0.001823779 |
| ENSMUSG00000035769 | 4834.28811  | 0.926736903 | 0.11164786  | 8.300534374 | 1.04E-16    | 6.02E-15    |
| ENSMUSG00000025977 | 46.17014955 | 0.927012547 | 0.393750035 | 2.354317372 | 0.01855676  | 0.07021281  |
| ENSMUSG00000111713 | 51.81732733 | 0.92794188  | 0.355156298 | 2.612770452 | 0.00898116  | 0.03984262  |
| ENSMUSG00000032570 | 7179.553493 | 0.92851091  | 0.135276891 | 6.863780649 | 6.71E-12    | 2.37E-10    |
| ENSMUSG00000023034 | 7098.337156 | 0.929421218 | 0.435278261 | 2.135234633 | 0.032741849 | 0.10993315  |
| ENSMUSG00000042476 | 30.96424233 | 0.929823149 | 0.46698325  | 1.991127409 | 0.046466882 | 0.143248263 |
| ENSMUSG00000067377 | 220.7182692 | 0.92999824  | 0.22213983  | 4.186544313 | 2.83E-05    | 0.000300924 |
| ENSMUSG00000113019 | 117.4799712 | 0.931537906 | 0.290205762 | 3.209922154 | 0.001327709 | 0.008378394 |
| ENSMUSG00000109157 | 88.92983612 | 0.932696522 | 0.330429166 | 2.822682188 | 0.004762375 | 0.023855736 |
| ENSMUSG00000107017 | 34.57325246 | 0.932826351 | 0.430657944 | 2.16604933  | 0.030307418 | 0.103047068 |
| ENSMUSG00000086434 | 44.15239739 | 0.932867083 | 0.399180707 | 2.336954332 | 0.019441559 | 0.072807087 |
| ENSMUSG00000049940 | 4603.616943 | 0.93297197  | 0.103567666 | 9.00833248  | 2.09E-19    | 1.61E-17    |
| ENSMUSG00000103270 | 35.19899515 | 0.933051957 | 0.441406701 | 2.113814661 | 0.0345311   | 0.114305784 |
| ENSMUSG00000020000 | 271.1536009 | 0.9333204   | 0.251287956 | 3.71414697  | 0.00020389  | 0.001704896 |
| ENSMUSG00000105572 | 145.1493031 | 0.933778098 | 0.247180422 | 3.777718683 | 0.000158272 | 0.001362259 |
| ENSMUSG00000023259 | 2001.060158 | 0.933839364 | 0.197934163 | 4.717929174 | 2.38E-06    | 3.30E-05    |
| ENSMUSG00000109679 | 48.26275643 | 0.934255155 | 0.344133202 | 2.714806797 | 0.006631445 | 0.031219726 |
| ENSMUSG00000034422 | 4737.039074 | 0.93432427  | 0.183203007 | 5.099939603 | 3.40E-07    | 5.68E-06    |
| ENSMUSG00000036769 | 1317.471884 | 0.934647607 | 0.130482637 | 7.163003652 | 7.89E-13    | 3.10E-11    |
| ENSMUSG00000114617 | 124.8499626 | 0.934773928 | 0.25599055  | 3.651595454 | 0.000260616 | 0.002104273 |
| ENSMUSG00000047344 | 96.74749109 | 0.934878011 | 0.34344107  | 2.722091477 | 0.006487018 | 0.030655232 |

|                    |             |             |             |             |             |             |
|--------------------|-------------|-------------|-------------|-------------|-------------|-------------|
| ENSMUSG00000032690 | 172.5710381 | 0.935523759 | 0.372955687 | 2.508404593 | 0.012127771 | 0.050362346 |
| ENSMUSG00000017314 | 125.7513264 | 0.935570376 | 0.315718431 | 2.963306173 | 0.003043537 | 0.016652088 |
| ENSMUSG00000092335 | 48.18623788 | 0.936397531 | 0.441211032 | 2.122334811 | 0.033809632 | 0.112401402 |
| ENSMUSG00000044328 | 163.7753781 | 0.936496932 | 0.236500926 | 3.959802386 | 7.50E-05    | 0.000715806 |
| ENSMUSG00000097151 | 201.314199  | 0.937677054 | 0.200200168 | 4.683697632 | 2.82E-06    | 3.84E-05    |
| ENSMUSG00000052403 | 26.69821643 | 0.937688676 | 0.47079413  | 1.991717007 | 0.046402117 | 0.143088164 |
| ENSMUSG00000004040 | 6991.565481 | 0.938260148 | 0.16005865  | 5.861977133 | 4.57E-09    | 1.08E-07    |
| ENSMUSG00000020646 | 27.77592179 | 0.938394899 | 0.447642847 | 2.096302679 | 0.036055349 | 0.118297829 |
| ENSMUSG00000020642 | 74.5751622  | 0.938432114 | 0.419398695 | 2.237565652 | 0.025249394 | 0.089749239 |
| ENSMUSG00000104026 | 94.00612764 | 0.93883753  | 0.309478012 | 3.033616265 | 0.002416416 | 0.013750571 |
| ENSMUSG00000103887 | 99.12809837 | 0.940095381 | 0.24925154  | 3.771673309 | 0.000162156 | 0.001391937 |
| ENSMUSG00000103238 | 259.9023013 | 0.940300646 | 0.199197355 | 4.720447453 | 2.35E-06    | 3.26E-05    |
| ENSMUSG00000053158 | 369.372187  | 0.940307669 | 0.174683642 | 5.382917693 | 7.33E-08    | 1.42E-06    |
| ENSMUSG00000104125 | 161.9642584 | 0.9411976   | 0.214567893 | 4.386479211 | 1.15E-05    | 0.000135144 |
| ENSMUSG00000021908 | 479.0016395 | 0.941301945 | 0.212991035 | 4.419443961 | 9.90E-06    | 0.000117948 |
| ENSMUSG00000031758 | 167.6930472 | 0.942748608 | 0.207285374 | 4.548071054 | 5.41E-06    | 6.90E-05    |
| ENSMUSG00000050103 | 1995.000831 | 0.943585484 | 0.150292055 | 6.278345733 | 3.42E-10    | 9.56E-09    |
| ENSMUSG00000102776 | 48.0052272  | 0.943767364 | 0.358177615 | 2.634914426 | 0.00841585  | 0.037869626 |
| ENSMUSG00000080885 | 62.44081522 | 0.943958775 | 0.324918249 | 2.90521932  | 0.003669958 | 0.019252821 |
| ENSMUSG00000024427 | 172.3207101 | 0.943976392 | 0.278851258 | 3.385232685 | 0.000711179 | 0.004986498 |
| ENSMUSG00000029761 | 140.0148973 | 0.944265564 | 0.269409179 | 3.504949489 | 0.000456694 | 0.003430357 |
| ENSMUSG00000105293 | 75.50209043 | 0.946880766 | 0.291316307 | 3.250352774 | 0.001152619 | 0.007478779 |
| ENSMUSG00000114569 | 34.32756361 | 0.946893219 | 0.452354463 | 2.093254948 | 0.036326402 | 0.11901206  |
| ENSMUSG00000019779 | 4891.652465 | 0.947594759 | 0.10751762  | 8.813390365 | 1.21E-18    | 8.65E-17    |
| ENSMUSG00000001700 | 3102.341548 | 0.948747726 | 0.138279658 | 6.861079491 | 6.83E-12    | 2.41E-10    |
| ENSMUSG00000029082 | 152.2935742 | 0.949037563 | 0.362756092 | 2.616186425 | 0.0088918   | 0.039556652 |
| ENSMUSG00000037110 | 16916.53725 | 0.949070224 | 0.129621236 | 7.321872984 | 2.45E-13    | 1.00E-11    |
| ENSMUSG00000077457 | 28.069967   | 0.949272093 | 0.480633489 | 1.975043593 | 0.048263201 | 0.147319689 |
| ENSMUSG00000102912 | 70.66697789 | 0.949625443 | 0.316193699 | 3.003302864 | 0.002670665 | 0.014971971 |

|                     |             |             |             |             |             |             |
|---------------------|-------------|-------------|-------------|-------------|-------------|-------------|
| ENSMUSG00000032816  | 765.2884892 | 0.950477397 | 0.220384109 | 4.312821841 | 1.61E-05    | 0.000183865 |
| ENSMUSG00000008206  | 5108.213551 | 0.950823321 | 0.162903998 | 5.836709551 | 5.32E-09    | 1.24E-07    |
| ENSMUSG000000084625 | 35.19125496 | 0.951384094 | 0.396625372 | 2.398697013 | 0.016453523 | 0.063869454 |
| ENSMUSG000000038527 | 119.9267989 | 0.952140422 | 0.409729912 | 2.323824533 | 0.0201349   | 0.074863023 |
| ENSMUSG000000109642 | 70.41685881 | 0.952421942 | 0.319690616 | 2.979198931 | 0.002890031 | 0.015953113 |
| ENSMUSG000000089265 | 44.98472608 | 0.953146925 | 0.374817316 | 2.542963955 | 0.010991657 | 0.046726065 |
| ENSMUSG000000024131 | 2506.916953 | 0.954304246 | 0.108591762 | 8.787998517 | 1.52E-18    | 1.08E-16    |
| ENSMUSG000000054422 | 2439.087646 | 0.954956838 | 0.366705725 | 2.604150338 | 0.009210235 | 0.040665338 |
| ENSMUSG000000064778 | 30.28059416 | 0.955474864 | 0.454744241 | 2.101125813 | 0.035629924 | 0.117108758 |
| ENSMUSG000000085525 | 131.9237828 | 0.956551023 | 0.26473501  | 3.613239606 | 0.000302395 | 0.002405891 |
| ENSMUSG000000065036 | 53.6975594  | 0.957776036 | 0.377864496 | 2.534707671 | 0.01125412  | 0.047578792 |
| ENSMUSG000000108812 | 143.6944826 | 0.958183559 | 0.271135481 | 3.533965953 | 0.000409374 | 0.003126522 |
| ENSMUSG000000039683 | 39.16654689 | 0.958555067 | 0.391352022 | 2.449342311 | 0.014311736 | 0.057486676 |
| ENSMUSG000000059422 | 46.13129265 | 0.958559215 | 0.374971153 | 2.556354557 | 0.010577528 | 0.045319779 |
| ENSMUSG000000112955 | 40.62565803 | 0.959365192 | 0.406356085 | 2.360897811 | 0.018230753 | 0.06929675  |
| ENSMUSG000000102662 | 617.3845362 | 0.960205663 | 0.138529362 | 6.931423396 | 4.17E-12    | 1.51E-10    |
| ENSMUSG000000027007 | 6685.436702 | 0.961114679 | 0.110965129 | 8.661411773 | 4.66E-18    | 3.21E-16    |
| ENSMUSG000000006241 | 138.5557669 | 0.962422595 | 0.236094232 | 4.076434172 | 4.57E-05    | 0.000464417 |
| ENSMUSG000000065738 | 106.6899662 | 0.962906012 | 0.255355611 | 3.770843364 | 0.000162697 | 0.0013955   |
| ENSMUSG000000104266 | 158.4204198 | 0.963043503 | 0.24380153  | 3.950112635 | 7.81E-05    | 0.000740344 |
| ENSMUSG000000105201 | 349.8362583 | 0.963492168 | 0.188055235 | 5.123453058 | 3.00E-07    | 5.08E-06    |
| ENSMUSG000000102252 | 398.6418868 | 0.963610536 | 0.182087603 | 5.292016164 | 1.21E-07    | 2.23E-06    |
| ENSMUSG000000093402 | 58.07007666 | 0.965267447 | 0.359086013 | 2.688123212 | 0.007185488 | 0.033321598 |
| ENSMUSG000000079547 | 2826.672103 | 0.966302694 | 0.378736648 | 2.551384188 | 0.010729598 | 0.045856795 |
| ENSMUSG000000058258 | 2254.485404 | 0.966367595 | 0.130954126 | 7.379436039 | 1.59E-13    | 6.65E-12    |
| ENSMUSG000000029269 | 1422.052978 | 0.966840245 | 0.199721692 | 4.840937575 | 1.29E-06    | 1.90E-05    |
| ENSMUSG000000073889 | 789.3410128 | 0.966947229 | 0.125573464 | 7.700251283 | 1.36E-14    | 6.52E-13    |
| ENSMUSG000000000078 | 10932.00804 | 0.967470737 | 0.173114947 | 5.588603158 | 2.29E-08    | 4.80E-07    |
| ENSMUSG000000106732 | 49.05436442 | 0.967605417 | 0.373147081 | 2.593093892 | 0.00951168  | 0.041714843 |



|                    |             |             |             |             |             |             |
|--------------------|-------------|-------------|-------------|-------------|-------------|-------------|
| ENSMUSG00000026103 | 15106.53951 | 0.968147098 | 0.101873286 | 9.503444315 | 2.03E-21    | 1.86E-19    |
| ENSMUSG00000102143 | 155.1665524 | 0.968645854 | 0.216352987 | 4.477154988 | 7.56E-06    | 9.29E-05    |
| ENSMUSG00000081824 | 27.75278602 | 0.969099284 | 0.442018972 | 2.192438212 | 0.02834788  | 0.098135063 |
| ENSMUSG00000029664 | 225.3553036 | 0.970148373 | 0.197643199 | 4.908584643 | 9.17E-07    | 1.39E-05    |
| ENSMUSG00000096960 | 71.6137905  | 0.970824085 | 0.315108197 | 3.080922981 | 0.0020636   | 0.012082003 |
| ENSMUSG00000093989 | 54.62142631 | 0.970867364 | 0.369379641 | 2.628372701 | 0.008579446 | 0.038473804 |
| ENSMUSG00000010651 | 155.3080708 | 0.970971869 | 0.378675557 | 2.564126076 | 0.010343596 | 0.044557185 |
| ENSMUSG00000112391 | 48.22361304 | 0.971515069 | 0.417247893 | 2.328388196 | 0.0198915   | 0.074143463 |
| ENSMUSG00000047728 | 411.5866331 | 0.972314939 | 0.162492996 | 5.98373444  | 2.18E-09    | 5.43E-08    |
| ENSMUSG00000020042 | 122.63854   | 0.972817736 | 0.270110667 | 3.601552456 | 0.000316323 | 0.002496217 |
| ENSMUSG00000110972 | 56.36502879 | 0.973117566 | 0.346879798 | 2.805345172 | 0.005026272 | 0.024925705 |
| ENSMUSG00000063364 | 461.5126181 | 0.973707119 | 0.155002264 | 6.281889658 | 3.34E-10    | 9.38E-09    |
| ENSMUSG00000035901 | 1089.196113 | 0.974036858 | 0.143789471 | 6.774048568 | 1.25E-11    | 4.25E-10    |
| ENSMUSG00000018171 | 8440.301617 | 0.974052176 | 0.128273262 | 7.593571424 | 3.11E-14    | 1.42E-12    |
| ENSMUSG00000029605 | 165.0672162 | 0.97467229  | 0.20223777  | 4.819437479 | 1.44E-06    | 2.09E-05    |
| ENSMUSG00000065915 | 22.6215341  | 0.975195882 | 0.496025338 | 1.966020298 | 0.049296266 | 0.149600787 |
| ENSMUSG00000064346 | 195.9489005 | 0.975375054 | 0.25852071  | 3.772908769 | 0.000161355 | 0.001385593 |
| ENSMUSG00000092243 | 58.76901359 | 0.975416912 | 0.342578029 | 2.847283912 | 0.004409402 | 0.022364448 |
| ENSMUSG00000046460 | 675.9279643 | 0.976130891 | 0.200352516 | 4.872067055 | 1.10E-06    | 1.65E-05    |
| ENSMUSG00000048706 | 2845.185686 | 0.976481524 | 0.119104474 | 8.198529319 | 2.43E-16    | 1.36E-14    |
| ENSMUSG00000085206 | 38.81045462 | 0.977640348 | 0.379599868 | 2.575449648 | 0.010010985 | 0.043409483 |
| ENSMUSG00000097786 | 56.47925606 | 0.97889406  | 0.371242351 | 2.636806003 | 0.008369068 | 0.037697149 |
| ENSMUSG00000103572 | 152.0949776 | 0.981378565 | 0.214201494 | 4.581567321 | 4.62E-06    | 6.01E-05    |
| ENSMUSG00000024777 | 1289.753243 | 0.981396976 | 0.119274574 | 8.228048454 | 1.90E-16    | 1.08E-14    |
| ENSMUSG00000034557 | 5598.342137 | 0.981755547 | 0.117567125 | 8.350595825 | 6.79E-17    | 4.12E-15    |
| ENSMUSG00000027803 | 1430.678294 | 0.982902471 | 0.117016333 | 8.399703229 | 4.48E-17    | 2.77E-15    |
| ENSMUSG00000019564 | 374.1443129 | 0.983940816 | 0.167436986 | 5.876484272 | 4.19E-09    | 9.98E-08    |
| ENSMUSG00000040699 | 325.8863378 | 0.984382272 | 0.161133045 | 6.109127221 | 1.00E-09    | 2.61E-08    |
| ENSMUSG00000001270 | 15224.08565 | 0.987408203 | 0.117774662 | 8.383876377 | 5.12E-17    | 3.15E-15    |

|                    |             |             |             |             |             |             |
|--------------------|-------------|-------------|-------------|-------------|-------------|-------------|
| ENSMUSG00000041660 | 67.39521294 | 0.987692184 | 0.363485842 | 2.717278283 | 0.006582124 | 0.031026833 |
| ENSMUSG00000103821 | 43.17199685 | 0.988249809 | 0.446640495 | 2.212629216 | 0.026923219 | 0.09446424  |
| ENSMUSG00000105950 | 125.8583566 | 0.988693526 | 0.264819252 | 3.733465447 | 0.000188863 | 0.001592979 |
| ENSMUSG00000086706 | 599.9306758 | 0.988706464 | 0.190645988 | 5.186085879 | 2.15E-07    | 3.76E-06    |
| ENSMUSG00000036594 | 8441.543769 | 0.990137164 | 0.483956836 | 2.045920402 | 0.040764203 | 0.129850376 |
| ENSMUSG00000019429 | 99.14907992 | 0.990301087 | 0.28957763  | 3.419812115 | 0.000626644 | 0.004480535 |
| ENSMUSG00000113680 | 165.1479113 | 0.991886332 | 0.221893602 | 4.470098844 | 7.82E-06    | 9.57E-05    |
| ENSMUSG00000026062 | 3317.730811 | 0.992226098 | 0.128754149 | 7.706362145 | 1.29E-14    | 6.25E-13    |
| ENSMUSG00000102939 | 67.37662702 | 0.992318404 | 0.337866198 | 2.937015929 | 0.003313871 | 0.017786434 |
| ENSMUSG00000043424 | 94.15889905 | 0.992735153 | 0.484848189 | 2.047517504 | 0.0406073   | 0.129498555 |
| ENSMUSG00000034947 | 932.7073077 | 0.992764843 | 0.12443411  | 7.97823717  | 1.48E-15    | 7.92E-14    |
| ENSMUSG00000026288 | 620.3705443 | 0.994269956 | 0.219802132 | 4.5234773   | 6.08E-06    | 7.66E-05    |
| ENSMUSG00000112139 | 29.71759708 | 0.994854734 | 0.466350912 | 2.13327498  | 0.032902175 | 0.110276181 |
| ENSMUSG00000073802 | 358.0725673 | 0.996408147 | 0.282365757 | 3.52878535  | 0.000417472 | 0.003180743 |
| ENSMUSG00000110344 | 571.006696  | 0.997299579 | 0.151118888 | 6.599436976 | 4.13E-11    | 1.32E-09    |
| ENSMUSG00000114253 | 50.16501295 | 0.997749842 | 0.38135925  | 2.616299045 | 0.008888867 | 0.039556652 |
| ENSMUSG00000113869 | 23.9077887  | 0.998232751 | 0.4780162   | 2.088282262 | 0.036772381 | 0.119969212 |
| ENSMUSG00000102874 | 88.45000633 | 0.998356361 | 0.29832108  | 3.346583353 | 0.000818141 | 0.005613922 |
| ENSMUSG00000038700 | 32.83106691 | 0.99882782  | 0.443397782 | 2.252667607 | 0.024280115 | 0.086913458 |
| ENSMUSG00000030364 | 1278.090902 | 0.998872244 | 0.417178323 | 2.394353183 | 0.016649708 | 0.064477676 |
| ENSMUSG00000079494 | 26.68621349 | 0.99966254  | 0.486795467 | 2.05355762  | 0.040018527 | 0.128097198 |
| ENSMUSG00000109652 | 91.55465316 | 1.000158587 | 0.326891846 | 3.059600901 | 0.002216321 | 0.012817992 |
| ENSMUSG00000102411 | 312.299302  | 1.000390779 | 0.177201137 | 5.645509945 | 1.65E-08    | 3.54E-07    |
| ENSMUSG00000029484 | 123.3325301 | 1.000397345 | 0.333970367 | 2.995467394 | 0.002740246 | 0.015298419 |
| ENSMUSG00000022219 | 1998.478097 | 1.001009557 | 0.162158009 | 6.173050387 | 6.70E-10    | 1.80E-08    |
| ENSMUSG00000055447 | 5535.679713 | 1.001329429 | 0.106846713 | 9.371644713 | 7.14E-21    | 6.17E-19    |
| ENSMUSG00000029641 | 301.5676663 | 1.001660592 | 0.199989157 | 5.008574494 | 5.48E-07    | 8.70E-06    |
| ENSMUSG00000029798 | 153.4176239 | 1.00183451  | 0.291861673 | 3.432566189 | 0.000597898 | 0.004317915 |
| ENSMUSG00000103659 | 30.06012173 | 1.002820884 | 0.452447317 | 2.216436804 | 0.026661601 | 0.093713302 |

|                    |             |             |             |             |             |             |
|--------------------|-------------|-------------|-------------|-------------|-------------|-------------|
| ENSMUSG00000031886 | 5345.978019 | 1.003279674 | 0.171465397 | 5.85120785  | 4.88E-09    | 1.15E-07    |
| ENSMUSG00000113379 | 33.43620723 | 1.004754612 | 0.409141019 | 2.455766023 | 0.014058466 | 0.056673508 |
| ENSMUSG00000055737 | 2436.758918 | 1.005319984 | 0.178200673 | 5.64150498  | 1.69E-08    | 3.61E-07    |
| ENSMUSG00000038984 | 293.7716167 | 1.006812262 | 0.175109121 | 5.749627745 | 8.94E-09    | 2.02E-07    |
| ENSMUSG00000053835 | 27.35630179 | 1.007539968 | 0.452315156 | 2.227517596 | 0.025912701 | 0.091537961 |
| ENSMUSG00000113540 | 36.49286458 | 1.008340578 | 0.434206708 | 2.322259325 | 0.020218976 | 0.075125523 |
| ENSMUSG00000114859 | 54.37143702 | 1.010767424 | 0.376205915 | 2.686739847 | 0.007215313 | 0.033417938 |
| ENSMUSG00000060002 | 3874.883828 | 1.011559338 | 0.128051121 | 7.899652331 | 2.80E-15    | 1.44E-13    |
| ENSMUSG00000037542 | 40.99862816 | 1.012202437 | 0.41587917  | 2.433885872 | 0.014937704 | 0.059412474 |
| ENSMUSG00000073413 | 159.9874513 | 1.013083368 | 0.25804086  | 3.926057944 | 8.63E-05    | 0.000808768 |
| ENSMUSG00000074170 | 171.4625606 | 1.013116596 | 0.210737734 | 4.807476    | 1.53E-06    | 2.21E-05    |
| ENSMUSG00000034612 | 1608.313899 | 1.013281368 | 0.153389799 | 6.605924085 | 3.95E-11    | 1.27E-09    |
| ENSMUSG00000030878 | 2103.397419 | 1.013371399 | 0.131928421 | 7.681221307 | 1.58E-14    | 7.51E-13    |
| ENSMUSG00000025959 | 1892.477161 | 1.015300059 | 0.123026186 | 8.252715075 | 1.55E-16    | 8.88E-15    |
| ENSMUSG00000091534 | 26.26532582 | 1.015468228 | 0.466509839 | 2.176734858 | 0.029500356 | 0.10102694  |
| ENSMUSG00000022098 | 1402.520224 | 1.016726387 | 0.176882882 | 5.748020256 | 9.03E-09    | 2.04E-07    |
| ENSMUSG00000089663 | 34.0015347  | 1.01731634  | 0.422333913 | 2.408796235 | 0.016005231 | 0.062619765 |
| ENSMUSG00000030650 | 6123.333331 | 1.017420687 | 0.157612476 | 6.455204024 | 1.08E-10    | 3.27E-09    |
| ENSMUSG00000057335 | 179.6355257 | 1.017740502 | 0.221629646 | 4.592077467 | 4.39E-06    | 5.75E-05    |
| ENSMUSG00000109279 | 319.1097616 | 1.018628268 | 0.245353339 | 4.151678855 | 3.30E-05    | 0.00034507  |
| ENSMUSG00000040666 | 106.3364427 | 1.018790896 | 0.283484579 | 3.593814172 | 0.000325872 | 0.002566129 |
| ENSMUSG00000037259 | 33.69091576 | 1.019114219 | 0.411887235 | 2.474255406 | 0.013351421 | 0.054264633 |
| ENSMUSG00000036216 | 172.3845813 | 1.020050418 | 0.26928604  | 3.787981056 | 0.000151876 | 0.001313298 |
| ENSMUSG00000107091 | 54.82117622 | 1.020156608 | 0.383671403 | 2.658933138 | 0.007838852 | 0.035756644 |
| ENSMUSG00000047230 | 16268.24337 | 1.020198278 | 0.119148801 | 8.562388146 | 1.11E-17    | 7.27E-16    |
| ENSMUSG00000096687 | 385.3722209 | 1.022401903 | 0.153012901 | 6.681801982 | 2.36E-11    | 7.81E-10    |
| ENSMUSG00000031351 | 31.64243555 | 1.023030107 | 0.475845248 | 2.149921875 | 0.031561395 | 0.10654718  |
| ENSMUSG00000094551 | 40.7280436  | 1.02362781  | 0.442622814 | 2.312641322 | 0.020742368 | 0.076721862 |
| ENSMUSG00000013698 | 437.9128371 | 1.023769695 | 0.174929405 | 5.852473435 | 4.84E-09    | 1.14E-07    |

|                    |             |             |             |             |             |             |
|--------------------|-------------|-------------|-------------|-------------|-------------|-------------|
| ENSMUSG00000105517 | 135.7259768 | 1.024060026 | 0.250300806 | 4.091317341 | 4.29E-05    | 0.000437383 |
| ENSMUSG00000000159 | 2926.680146 | 1.024383368 | 0.107420026 | 9.536242057 | 1.48E-21    | 1.38E-19    |
| ENSMUSG00000106062 | 230.9910763 | 1.024937174 | 0.226493018 | 4.525248438 | 6.03E-06    | 7.61E-05    |
| ENSMUSG00000074207 | 16884.29278 | 1.025654055 | 0.177893373 | 5.765555149 | 8.14E-09    | 1.84E-07    |
| ENSMUSG00000087611 | 232.6149851 | 1.026790672 | 0.209981254 | 4.889915902 | 1.01E-06    | 1.52E-05    |
| ENSMUSG00000021919 | 96.45213061 | 1.026796008 | 0.347048629 | 2.95865168  | 0.003089881 | 0.016821512 |
| ENSMUSG00000032036 | 28.73783815 | 1.027648765 | 0.515431009 | 1.993765889 | 0.046177645 | 0.142612887 |
| ENSMUSG00000017740 | 96.14091159 | 1.027983044 | 0.316992275 | 3.242927746 | 0.001183082 | 0.007626489 |
| ENSMUSG00000026825 | 9410.930436 | 1.029016862 | 0.132746046 | 7.751770333 | 9.06E-15    | 4.45E-13    |
| ENSMUSG00000026531 | 57.6027417  | 1.03055601  | 0.450179445 | 2.289211605 | 0.022067061 | 0.080582531 |
| ENSMUSG00000055799 | 36.00991926 | 1.030952969 | 0.43296235  | 2.381160787 | 0.017258177 | 0.066380581 |
| ENSMUSG00000053783 | 84.26134167 | 1.031950277 | 0.27761982  | 3.717134738 | 0.000201495 | 0.001689301 |
| ENSMUSG00000082361 | 586.4896169 | 1.031966411 | 0.151188265 | 6.825704436 | 8.75E-12    | 3.03E-10    |
| ENSMUSG00000028358 | 2422.672062 | 1.032302182 | 0.12742287  | 8.101388551 | 5.43E-16    | 2.96E-14    |
| ENSMUSG00000103506 | 45.72984809 | 1.033498339 | 0.416176867 | 2.483315195 | 0.013016586 | 0.053253141 |
| ENSMUSG00000027801 | 2103.736652 | 1.034088503 | 0.181479239 | 5.698109098 | 1.21E-08    | 2.65E-07    |
| ENSMUSG00000114310 | 239.5822036 | 1.03592824  | 0.231401904 | 4.476748983 | 7.58E-06    | 9.30E-05    |
| ENSMUSG00000104107 | 102.9561565 | 1.036430795 | 0.312810742 | 3.313283901 | 0.000922073 | 0.0062256   |
| ENSMUSG00000023984 | 168.6314376 | 1.036806375 | 0.212629971 | 4.87610646  | 1.08E-06    | 1.61E-05    |
| ENSMUSG00000085550 | 69.40477098 | 1.037208026 | 0.313224469 | 3.311388886 | 0.000928341 | 0.006258444 |
| ENSMUSG00000028525 | 1337.899287 | 1.037337474 | 0.38961926  | 2.662438898 | 0.007757665 | 0.035480659 |
| ENSMUSG00000034923 | 191.8620631 | 1.037444608 | 0.271037107 | 3.827684777 | 0.000129354 | 0.001147466 |
| ENSMUSG00000105272 | 117.8312281 | 1.03882738  | 0.246937264 | 4.206847378 | 2.59E-05    | 0.000277645 |
| ENSMUSG00000104591 | 51.00380848 | 1.039390527 | 0.372084659 | 2.793424837 | 0.005215315 | 0.025703146 |
| ENSMUSG00000019943 | 11610.4624  | 1.039803302 | 0.141575231 | 7.344528402 | 2.06E-13    | 8.54E-12    |
| ENSMUSG00000091509 | 260.3978946 | 1.04008766  | 0.2174561   | 4.782977612 | 1.73E-06    | 2.48E-05    |
| ENSMUSG00000031278 | 543.4677315 | 1.040621286 | 0.136154621 | 7.642937676 | 2.12E-14    | 9.97E-13    |
| ENSMUSG00000052631 | 1551.597807 | 1.040770518 | 0.171794467 | 6.058230721 | 1.38E-09    | 3.52E-08    |
| ENSMUSG00000021665 | 2002.848372 | 1.042901556 | 0.138237748 | 7.544260337 | 4.55E-14    | 2.05E-12    |

|                    |             |             |             |             |             |             |
|--------------------|-------------|-------------|-------------|-------------|-------------|-------------|
| ENSMUSG00000033220 | 343.779237  | 1.043523939 | 0.231320559 | 4.511159516 | 6.45E-06    | 8.08E-05    |
| ENSMUSG00000053702 | 366.5125765 | 1.0437446   | 0.247485423 | 4.217398295 | 2.47E-05    | 0.000266123 |
| ENSMUSG00000108024 | 31.35006926 | 1.044526023 | 0.427280468 | 2.444591084 | 0.014501646 | 0.058079031 |
| ENSMUSG00000067818 | 75.64156299 | 1.044722964 | 0.353264339 | 2.957340576 | 0.003103052 | 0.016886568 |
| ENSMUSG00000063727 | 118.2597273 | 1.045855921 | 0.250440785 | 4.176060706 | 2.97E-05    | 0.000314078 |
| ENSMUSG00000087541 | 87.49982855 | 1.047999515 | 0.271812217 | 3.855601214 | 0.000115446 | 0.001036871 |
| ENSMUSG00000019944 | 112.5062404 | 1.048867933 | 0.30709251  | 3.415478715 | 0.0006367   | 0.00454515  |
| ENSMUSG00000031340 | 979.3300224 | 1.049805749 | 0.151926827 | 6.909943211 | 4.85E-12    | 1.74E-10    |
| ENSMUSG00000102554 | 22.3493908  | 1.049994325 | 0.516316805 | 2.033624153 | 0.041989505 | 0.132748504 |
| ENSMUSG00000038633 | 1879.659146 | 1.050050756 | 0.133457107 | 7.868076738 | 3.60E-15    | 1.84E-13    |
| ENSMUSG00000077345 | 41.50882996 | 1.050217612 | 0.383622454 | 2.737633321 | 0.006188303 | 0.02946314  |
| ENSMUSG00000040938 | 477.6041813 | 1.050573556 | 0.18200711  | 5.772156671 | 7.83E-09    | 1.78E-07    |
| ENSMUSG00000044313 | 162.0601401 | 1.050869847 | 0.280114806 | 3.751568367 | 0.000175732 | 0.001495229 |
| ENSMUSG00000039062 | 31714.96397 | 1.052048335 | 0.159486495 | 6.596472839 | 4.21E-11    | 1.34E-09    |
| ENSMUSG00000104761 | 59.28873242 | 1.053116428 | 0.356317908 | 2.955552907 | 0.003121092 | 0.016959348 |
| ENSMUSG00000065408 | 31.67576007 | 1.05404343  | 0.477576509 | 2.207067159 | 0.027309368 | 0.095324184 |
| ENSMUSG00000021765 | 38.90129615 | 1.054191966 | 0.421251326 | 2.502524978 | 0.012331092 | 0.050972325 |
| ENSMUSG00000064542 | 21.63580347 | 1.054804481 | 0.537684892 | 1.961752128 | 0.04979135  | 0.150664435 |
| ENSMUSG00000026166 | 799.8705615 | 1.054904757 | 0.416484553 | 2.53287847  | 0.011313017 | 0.047782498 |
| ENSMUSG00000104339 | 562.3550396 | 1.055276595 | 0.158090993 | 6.675121542 | 2.47E-11    | 8.10E-10    |
| ENSMUSG00000110409 | 137.2542421 | 1.055906277 | 0.243546845 | 4.335536661 | 1.45E-05    | 0.000167754 |
| ENSMUSG00000073274 | 102.8924824 | 1.056625718 | 0.28118606  | 3.757745732 | 0.000171451 | 0.001463271 |
| ENSMUSG00000045038 | 2253.178625 | 1.057147021 | 0.150609765 | 7.019113431 | 2.23E-12    | 8.31E-11    |
| ENSMUSG00000002227 | 3662.881129 | 1.057321022 | 0.113371828 | 9.326135412 | 1.10E-20    | 9.31E-19    |
| ENSMUSG00000026659 | 1129.260387 | 1.057722311 | 0.144175096 | 7.336373216 | 2.19E-13    | 9.05E-12    |
| ENSMUSG00000096768 | 16363.57383 | 1.05772521  | 0.194283643 | 5.444231922 | 5.20E-08    | 1.03E-06    |
| ENSMUSG00000047250 | 223.5436988 | 1.05856336  | 0.234175412 | 4.52038646  | 6.17E-06    | 7.76E-05    |
| ENSMUSG00000110676 | 27.31571778 | 1.058966914 | 0.486943629 | 2.174721778 | 0.029650972 | 0.101387048 |
| ENSMUSG00000073678 | 2915.028218 | 1.059549202 | 0.144461217 | 7.334488972 | 2.23E-13    | 9.16E-12    |

|                     |             |             |             |             |             |             |
|---------------------|-------------|-------------|-------------|-------------|-------------|-------------|
| ENSMUSG00000042096  | 428.4551937 | 1.059826543 | 0.230991096 | 4.58817054  | 4.47E-06    | 5.85E-05    |
| ENSMUSG00000018427  | 1134.640345 | 1.059963305 | 0.179937273 | 5.890737855 | 3.84E-09    | 9.25E-08    |
| ENSMUSG000000112660 | 35.62016316 | 1.060541989 | 0.446060497 | 2.377574335 | 0.01742693  | 0.066891216 |
| ENSMUSG000000037188 | 339.4914778 | 1.060571564 | 0.175792435 | 6.033089901 | 1.61E-09    | 4.07E-08    |
| ENSMUSG000000115151 | 24.63082022 | 1.061426778 | 0.492128965 | 2.156806149 | 0.031020772 | 0.105087989 |
| ENSMUSG000000079507 | 545.9364494 | 1.061917364 | 0.231865338 | 4.57988837  | 4.65E-06    | 6.05E-05    |
| ENSMUSG000000112411 | 97.40323367 | 1.062104272 | 0.315573773 | 3.365629091 | 0.000763693 | 0.005287526 |
| ENSMUSG000000029727 | 2684.96232  | 1.062197756 | 0.2116807   | 5.017924431 | 5.22E-07    | 8.33E-06    |
| ENSMUSG000000003623 | 4225.771018 | 1.063898636 | 0.114979803 | 9.252917501 | 2.18E-20    | 1.82E-18    |
| ENSMUSG000000106224 | 110.4109691 | 1.063970443 | 0.23873639  | 4.456674762 | 8.32E-06    | 0.000100998 |
| ENSMUSG000000022180 | 5333.570055 | 1.064967668 | 0.141914133 | 7.50431014  | 6.18E-14    | 2.74E-12    |
| ENSMUSG000000028544 | 1382.055487 | 1.066666363 | 0.155130532 | 6.875927976 | 6.16E-12    | 2.18E-10    |
| ENSMUSG000000108388 | 36.45316447 | 1.067261766 | 0.400031026 | 2.667947477 | 0.007631619 | 0.035006476 |
| ENSMUSG000000104262 | 392.7418956 | 1.067463227 | 0.190049648 | 5.61675983  | 1.95E-08    | 4.12E-07    |
| ENSMUSG000000087181 | 31.87841283 | 1.067773634 | 0.441060638 | 2.42092253  | 0.015481176 | 0.061040613 |
| ENSMUSG000000092014 | 26.93937183 | 1.069688353 | 0.46908408  | 2.280376586 | 0.022585363 | 0.082108206 |
| ENSMUSG000000098836 | 61.22539779 | 1.070985791 | 0.353087324 | 3.033203742 | 0.002419722 | 0.01376236  |
| ENSMUSG000000062157 | 797.5991837 | 1.071822222 | 0.126093081 | 8.500246083 | 1.89E-17    | 1.21E-15    |
| ENSMUSG000000024539 | 4614.59222  | 1.072683104 | 0.103188541 | 10.39537041 | 2.60E-25    | 3.15E-23    |
| ENSMUSG000000113792 | 73.86571871 | 1.073189433 | 0.310134893 | 3.460395645 | 0.000539382 | 0.003942564 |
| ENSMUSG000000044788 | 35.46411255 | 1.073782592 | 0.518229309 | 2.072022121 | 0.038263378 | 0.123758027 |
| ENSMUSG000000059040 | 43.18823096 | 1.073905748 | 0.427275245 | 2.513381623 | 0.01195799  | 0.04984582  |
| ENSMUSG000000026149 | 9179.205278 | 1.074698783 | 0.100458624 | 10.69792462 | 1.04E-26    | 1.38E-24    |
| ENSMUSG000000039114 | 1636.750769 | 1.074906047 | 0.215096535 | 4.997319205 | 5.81E-07    | 9.16E-06    |
| ENSMUSG000000073888 | 156.6786465 | 1.075024421 | 0.251498233 | 4.274481013 | 1.92E-05    | 0.000213198 |
| ENSMUSG000000098374 | 72.34405197 | 1.076326378 | 0.300248456 | 3.584785718 | 0.000337355 | 0.002642555 |
| ENSMUSG000000022043 | 1581.685872 | 1.078847974 | 0.173679357 | 6.211722542 | 5.24E-10    | 1.42E-08    |
| ENSMUSG000000106607 | 50.0039562  | 1.079476851 | 0.371743093 | 2.903824905 | 0.003686343 | 0.019325135 |
| ENSMUSG000000114605 | 66.90839838 | 1.079587347 | 0.358954905 | 3.007584882 | 0.002633326 | 0.014807311 |

|                    |             |             |             |             |             |             |
|--------------------|-------------|-------------|-------------|-------------|-------------|-------------|
| ENSMUSG00000115017 | 45.01968842 | 1.079663844 | 0.3767161   | 2.86598806  | 0.004157099 | 0.021371017 |
| ENSMUSG00000023959 | 1924.184745 | 1.07966422  | 0.209527455 | 5.152853216 | 2.57E-07    | 4.41E-06    |
| ENSMUSG00000075270 | 1004.811048 | 1.080186101 | 0.199587294 | 5.412098526 | 6.23E-08    | 1.22E-06    |
| ENSMUSG00000103625 | 21.1091905  | 1.081691683 | 0.538590703 | 2.00837422  | 0.04460354  | 0.138944483 |
| ENSMUSG00000102163 | 711.8992418 | 1.081823419 | 0.158183002 | 6.839062396 | 7.97E-12    | 2.78E-10    |
| ENSMUSG00000051323 | 954.0913139 | 1.08198929  | 0.167921429 | 6.443425938 | 1.17E-10    | 3.51E-09    |
| ENSMUSG00000065767 | 81.35969529 | 1.082522665 | 0.351743864 | 3.077587915 | 0.002086833 | 0.012187314 |
| ENSMUSG00000023915 | 1141.468602 | 1.083029925 | 0.172480623 | 6.279139688 | 3.40E-10    | 9.53E-09    |
| ENSMUSG00000101031 | 1247.468746 | 1.083787975 | 0.146920649 | 7.376689283 | 1.62E-13    | 6.78E-12    |
| ENSMUSG00000093096 | 26.53729012 | 1.084108291 | 0.479756009 | 2.259707582 | 0.023839405 | 0.085743075 |
| ENSMUSG00000064844 | 52.28033334 | 1.084630748 | 0.341168118 | 3.179167952 | 0.001476985 | 0.009158675 |
| ENSMUSG00000026094 | 2054.254764 | 1.086026042 | 0.156416084 | 6.943186516 | 3.83E-12    | 1.39E-10    |
| ENSMUSG00000054545 | 199.9856945 | 1.087934762 | 0.214653168 | 5.068337777 | 4.01E-07    | 6.57E-06    |
| ENSMUSG00000048450 | 246.6893327 | 1.088249241 | 0.262605937 | 4.144038984 | 3.41E-05    | 0.000355443 |
| ENSMUSG00000028655 | 955.1390299 | 1.088945926 | 0.181593558 | 5.99661098  | 2.01E-09    | 5.04E-08    |
| ENSMUSG00000102808 | 148.19031   | 1.089411869 | 0.248153885 | 4.390065744 | 1.13E-05    | 0.000133144 |
| ENSMUSG00000096775 | 18.86030333 | 1.090666452 | 0.534030108 | 2.042331388 | 0.041118671 | 0.13083     |
| ENSMUSG00000092563 | 31.76951499 | 1.091073073 | 0.436992374 | 2.496778294 | 0.012532729 | 0.051585895 |
| ENSMUSG00000024774 | 49.26980687 | 1.091079252 | 0.509172393 | 2.142848409 | 0.032125273 | 0.108156055 |
| ENSMUSG00000025658 | 31.23384101 | 1.091483037 | 0.547739257 | 1.992705511 | 0.046293704 | 0.142872389 |
| ENSMUSG00000035811 | 4764.524328 | 1.092734264 | 0.199196237 | 5.485717406 | 4.12E-08    | 8.26E-07    |
| ENSMUSG00000065259 | 134.3225448 | 1.092911209 | 0.255620161 | 4.275528212 | 1.91E-05    | 0.000212304 |
| ENSMUSG00000032387 | 22.54269499 | 1.093750049 | 0.514047581 | 2.127721419 | 0.033360188 | 0.111288788 |
| ENSMUSG00000020600 | 142.3082757 | 1.0948181   | 0.2734238   | 4.004106806 | 6.23E-05    | 0.000608098 |
| ENSMUSG00000111067 | 49.69975805 | 1.094935827 | 0.505363785 | 2.16662899  | 0.030263155 | 0.102927958 |
| ENSMUSG00000022148 | 1029.678207 | 1.095158465 | 0.206280935 | 5.309062927 | 1.10E-07    | 2.05E-06    |
| ENSMUSG00000039634 | 176.575981  | 1.095347702 | 0.220715066 | 4.962722865 | 6.95E-07    | 1.08E-05    |
| ENSMUSG00000114147 | 87.89230786 | 1.096429634 | 0.306130066 | 3.58158102  | 0.000341521 | 0.002667199 |
| ENSMUSG00000025915 | 799.2081779 | 1.09672667  | 0.159745484 | 6.865462735 | 6.63E-12    | 2.34E-10    |

|                    |             |             |             |             |             |             |
|--------------------|-------------|-------------|-------------|-------------|-------------|-------------|
| ENSMUSG00000064343 | 237.3744581 | 1.096727386 | 0.335009834 | 3.273716988 | 0.001061429 | 0.006994953 |
| ENSMUSG00000105707 | 46.18590302 | 1.096833405 | 0.391655675 | 2.800504309 | 0.005102283 | 0.02524309  |
| ENSMUSG00000103076 | 86.55321998 | 1.098357727 | 0.273148553 | 4.021100294 | 5.79E-05    | 0.000570092 |
| ENSMUSG00000013089 | 673.5410963 | 1.09849766  | 0.176419498 | 6.226622742 | 4.77E-10    | 1.30E-08    |
| ENSMUSG00000105302 | 50.32748596 | 1.0994787   | 0.421674457 | 2.607411194 | 0.009122973 | 0.040367346 |
| ENSMUSG00000102423 | 160.4511481 | 1.10172445  | 0.219449203 | 5.02040762  | 5.16E-07    | 8.25E-06    |
| ENSMUSG00000030107 | 41.79230528 | 1.102589674 | 0.387612044 | 2.844570212 | 0.004447138 | 0.022519444 |
| ENSMUSG00000063354 | 4305.017035 | 1.103409593 | 0.115315817 | 9.568588455 | 1.08E-21    | 1.03E-19    |
| ENSMUSG00000064036 | 466.0367729 | 1.104098169 | 0.167574742 | 6.588690851 | 4.44E-11    | 1.40E-09    |
| ENSMUSG00000001014 | 34.96594464 | 1.10486984  | 0.437780097 | 2.523800983 | 0.011609363 | 0.048696196 |
| ENSMUSG00000029322 | 21800.80294 | 1.105191296 | 0.106902552 | 10.33830598 | 4.73E-25    | 5.67E-23    |
| ENSMUSG00000024781 | 450.1429355 | 1.105359984 | 0.168706482 | 6.551971035 | 5.68E-11    | 1.77E-09    |
| ENSMUSG00000029156 | 225.5980396 | 1.105389287 | 0.20579507  | 5.371310837 | 7.82E-08    | 1.51E-06    |
| ENSMUSG00000024066 | 6303.215395 | 1.106820989 | 0.367255127 | 3.013765928 | 0.002580268 | 0.014550548 |
| ENSMUSG00000105691 | 22.73576748 | 1.106937836 | 0.556564323 | 1.988876738 | 0.04671481  | 0.14385349  |
| ENSMUSG00000034919 | 744.2929551 | 1.107829998 | 0.167968278 | 6.595471557 | 4.24E-11    | 1.34E-09    |
| ENSMUSG00000098328 | 27.0024994  | 1.107864655 | 0.523884945 | 2.114709854 | 0.034454684 | 0.114103639 |
| ENSMUSG00000091587 | 36.57349744 | 1.108077001 | 0.433511183 | 2.55605171  | 0.010586739 | 0.045350529 |
| ENSMUSG00000027792 | 3717.665396 | 1.109114184 | 0.149822481 | 7.402855542 | 1.33E-13    | 5.62E-12    |
| ENSMUSG00000029925 | 46.67966025 | 1.110425531 | 0.388432112 | 2.858737723 | 0.004253303 | 0.021726013 |
| ENSMUSG00000103867 | 69.41063882 | 1.110678059 | 0.318139632 | 3.491165344 | 0.000480919 | 0.003585566 |
| ENSMUSG00000030278 | 342.8202516 | 1.112247262 | 0.218803787 | 5.083309002 | 3.71E-07    | 6.14E-06    |
| ENSMUSG00000057346 | 66.69352108 | 1.112912318 | 0.344396433 | 3.231486195 | 0.001231483 | 0.007873651 |
| ENSMUSG00000109005 | 490.6487068 | 1.113844989 | 0.158205043 | 7.040515055 | 1.92E-12    | 7.18E-11    |
| ENSMUSG00000027698 | 2609.982244 | 1.11447236  | 0.171337776 | 6.504533837 | 7.79E-11    | 2.39E-09    |
| ENSMUSG00000061728 | 218.6475121 | 1.115359762 | 0.329894261 | 3.380961395 | 0.000722327 | 0.005044977 |
| ENSMUSG00000097150 | 51.06856612 | 1.116352259 | 0.351923917 | 3.172140925 | 0.001513196 | 0.009342684 |
| ENSMUSG00000080610 | 89.25444447 | 1.117172186 | 0.290136133 | 3.850510355 | 0.000117872 | 0.00105484  |
| ENSMUSG00000002059 | 130.135939  | 1.117326763 | 0.233839679 | 4.778174371 | 1.77E-06    | 2.53E-05    |



|                    |             |             |             |             |             |             |
|--------------------|-------------|-------------|-------------|-------------|-------------|-------------|
| ENSMUSG00000093044 | 41.95483955 | 1.117842796 | 0.442223232 | 2.527779444 | 0.011478644 | 0.048289989 |
| ENSMUSG00000105848 | 79.99601061 | 1.11800443  | 0.27552711  | 4.057693017 | 4.96E-05    | 0.000498527 |
| ENSMUSG00000092212 | 88.45553035 | 1.118013142 | 0.334021862 | 3.347125649 | 0.000816542 | 0.005606435 |
| ENSMUSG00000102496 | 171.3891699 | 1.118150614 | 0.227322852 | 4.918777872 | 8.71E-07    | 1.33E-05    |
| ENSMUSG00000108689 | 44.05021711 | 1.120229945 | 0.383113926 | 2.924012592 | 0.003455508 | 0.018382938 |
| ENSMUSG00000090565 | 46.23789054 | 1.120812285 | 0.388997332 | 2.881285274 | 0.00396057  | 0.020492963 |
| ENSMUSG00000097583 | 379.933311  | 1.121175277 | 0.172915416 | 6.483952104 | 8.94E-11    | 2.72E-09    |
| ENSMUSG00000022885 | 82.67588442 | 1.122444259 | 0.339402253 | 3.307120822 | 0.000942602 | 0.006328735 |
| ENSMUSG00000032643 | 272.9033958 | 1.123163131 | 0.276080561 | 4.068244165 | 4.74E-05    | 0.000479079 |
| ENSMUSG00000108122 | 27.27138847 | 1.123354011 | 0.512736061 | 2.190901123 | 0.028458948 | 0.098351621 |
| ENSMUSG00000109812 | 83.86590694 | 1.124670006 | 0.344339988 | 3.266161482 | 0.001090161 | 0.007152596 |
| ENSMUSG00000087657 | 57.45164153 | 1.124694889 | 0.436284009 | 2.577896199 | 0.009940385 | 0.043169098 |
| ENSMUSG00000080002 | 18.73354048 | 1.124744249 | 0.545423956 | 2.06214677  | 0.039193765 | 0.126108808 |
| ENSMUSG00000093465 | 106.3655144 | 1.125127373 | 0.262700276 | 4.282931834 | 1.84E-05    | 0.000206597 |
| ENSMUSG00000031543 | 31.7687632  | 1.125153128 | 0.441118299 | 2.550683414 | 0.010751194 | 0.045931489 |
| ENSMUSG00000101587 | 88.19843949 | 1.126321351 | 0.330956136 | 3.403234535 | 0.000665931 | 0.004726583 |
| ENSMUSG00000106858 | 40.86074033 | 1.127070609 | 0.423714468 | 2.659976694 | 0.007814606 | 0.035675236 |
| ENSMUSG00000028004 | 93.81328653 | 1.129490296 | 0.265045307 | 4.261498948 | 2.03E-05    | 0.000224403 |
| ENSMUSG00000102620 | 34.62831129 | 1.129864888 | 0.463538016 | 2.437480527 | 0.014790011 | 0.058935339 |
| ENSMUSG00000103558 | 56.29321661 | 1.13080853  | 0.346147073 | 3.266844116 | 0.001087535 | 0.007137472 |
| ENSMUSG00000020015 | 1575.554728 | 1.130912412 | 0.148249056 | 7.628462813 | 2.38E-14    | 1.10E-12    |
| ENSMUSG00000082769 | 44.60532614 | 1.131709757 | 0.41697269  | 2.714110022 | 0.006645409 | 0.031272266 |
| ENSMUSG00000024349 | 520.3063988 | 1.132094323 | 0.262343248 | 4.315317166 | 1.59E-05    | 0.000182267 |
| ENSMUSG00000102466 | 68.55530502 | 1.132757928 | 0.315889797 | 3.58592756  | 0.000335882 | 0.002632868 |
| ENSMUSG00000114800 | 33.30417505 | 1.133568494 | 0.437299456 | 2.592201928 | 0.009536378 | 0.041798499 |
| ENSMUSG00000085457 | 26.26644278 | 1.134640999 | 0.517299666 | 2.193392094 | 0.028279141 | 0.097957927 |
| ENSMUSG00000031586 | 40.26248235 | 1.134661818 | 0.397660704 | 2.853341572 | 0.004326209 | 0.022024888 |
| ENSMUSG00000002565 | 1602.773805 | 1.134751902 | 0.216798256 | 5.234137602 | 1.66E-07    | 2.97E-06    |
| ENSMUSG00000036810 | 1726.104523 | 1.135125751 | 0.141603334 | 8.016236062 | 1.09E-15    | 5.86E-14    |

|                    |             |             |             |             |             |             |
|--------------------|-------------|-------------|-------------|-------------|-------------|-------------|
| ENSMUSG00000102460 | 20.05289529 | 1.137186861 | 0.559015919 | 2.034265613 | 0.041924822 | 0.132638028 |
| ENSMUSG00000029334 | 7854.104726 | 1.139256    | 0.117062634 | 9.73202091  | 2.20E-22    | 2.17E-20    |
| ENSMUSG00000024810 | 146.6554846 | 1.139523894 | 0.279929268 | 4.070756527 | 4.69E-05    | 0.000474935 |
| ENSMUSG00000098874 | 65.7185955  | 1.139619245 | 0.333087488 | 3.42138113  | 0.00062304  | 0.004461915 |
| ENSMUSG00000021725 | 142.590239  | 1.139635716 | 0.288075987 | 3.956024689 | 7.62E-05    | 0.000725352 |
| ENSMUSG00000046372 | 71.44652853 | 1.140169931 | 0.343293902 | 3.321264735 | 0.000896105 | 0.006079719 |
| ENSMUSG00000046318 | 946.8302722 | 1.142984696 | 0.187930595 | 6.081951125 | 1.19E-09    | 3.07E-08    |
| ENSMUSG00000055435 | 1752.277622 | 1.1450955   | 0.387743955 | 2.953225927 | 0.003144717 | 0.017059192 |
| ENSMUSG00000113691 | 48.93310713 | 1.145424715 | 0.35738629  | 3.205004636 | 0.001350603 | 0.008499026 |
| ENSMUSG00000104503 | 138.6349582 | 1.145583811 | 0.257273769 | 4.45278123  | 8.48E-06    | 0.000102686 |
| ENSMUSG00000031539 | 156.4956789 | 1.145976254 | 0.224699875 | 5.100030675 | 3.40E-07    | 5.68E-06    |
| ENSMUSG00000096929 | 529.0009554 | 1.146188414 | 0.169174216 | 6.775195664 | 1.24E-11    | 4.22E-10    |
| ENSMUSG00000112317 | 64.57400716 | 1.146796923 | 0.408326735 | 2.808527642 | 0.004976861 | 0.024746706 |
| ENSMUSG00000096957 | 146.7952111 | 1.148148733 | 0.253725729 | 4.525156896 | 6.04E-06    | 7.61E-05    |
| ENSMUSG00000087677 | 28.61318842 | 1.148721521 | 0.444071065 | 2.5867966   | 0.009687276 | 0.04232679  |
| ENSMUSG00000054728 | 44.7566445  | 1.149217371 | 0.395330247 | 2.90698063  | 0.003649358 | 0.019167294 |
| ENSMUSG00000082855 | 22.86296727 | 1.149317125 | 0.509639882 | 2.255155386 | 0.024123577 | 0.086561528 |
| ENSMUSG00000003949 | 55.19685267 | 1.150117433 | 0.353080581 | 3.257379459 | 0.00112446  | 0.007325908 |
| ENSMUSG00000055912 | 105.2186916 | 1.150157813 | 0.312234275 | 3.683637274 | 0.000229929 | 0.001891671 |
| ENSMUSG00000038244 | 3292.152604 | 1.150570186 | 0.142796981 | 8.05738451  | 7.79E-16    | 4.20E-14    |
| ENSMUSG00000031445 | 138.9328883 | 1.151940521 | 0.357732578 | 3.220116345 | 0.001281386 | 0.008134411 |
| ENSMUSG00000089093 | 42.69366872 | 1.152302514 | 0.500859269 | 2.300651269 | 0.021411351 | 0.078734918 |
| ENSMUSG00000080006 | 21.09696012 | 1.152562889 | 0.531210295 | 2.169692305 | 0.030030163 | 0.102376965 |
| ENSMUSG00000057697 | 47.73052665 | 1.15287796  | 0.367399979 | 3.137936926 | 0.001701415 | 0.010305066 |
| ENSMUSG00000115624 | 155.877384  | 1.153327178 | 0.234890758 | 4.910057709 | 9.10E-07    | 1.38E-05    |
| ENSMUSG00000026158 | 65.27589609 | 1.153510117 | 0.34526465  | 3.340944745 | 0.000834938 | 0.005716905 |
| ENSMUSG00000033917 | 896.5301146 | 1.154925287 | 0.431423867 | 2.677008332 | 0.007428279 | 0.0342637   |
| ENSMUSG00000056025 | 4843.673808 | 1.156003609 | 0.140048627 | 8.254301654 | 1.53E-16    | 8.78E-15    |
| ENSMUSG00000031292 | 1504.042454 | 1.156743915 | 0.127244998 | 9.090682815 | 9.84E-20    | 7.81E-18    |

|                    |             |             |             |             |             |             |
|--------------------|-------------|-------------|-------------|-------------|-------------|-------------|
| ENSMUSG00000104469 | 141.8815076 | 1.156791348 | 0.221709035 | 5.217610315 | 1.81E-07    | 3.22E-06    |
| ENSMUSG00000025810 | 663.3376253 | 1.156842948 | 0.162242311 | 7.130340652 | 1.00E-12    | 3.91E-11    |
| ENSMUSG00000039013 | 419.1708352 | 1.157039337 | 0.232597017 | 4.974437546 | 6.54E-07    | 1.02E-05    |
| ENSMUSG00000092713 | 76.29204102 | 1.157855879 | 0.298187075 | 3.882984798 | 0.000103182 | 0.0009419   |
| ENSMUSG00000039270 | 1270.404643 | 1.157980825 | 0.129374554 | 8.950607308 | 3.54E-19    | 2.62E-17    |
| ENSMUSG00000074149 | 26.46089208 | 1.158216883 | 0.517544551 | 2.237907599 | 0.025227081 | 0.089705023 |
| ENSMUSG00000038886 | 2970.959303 | 1.159380608 | 0.128730715 | 9.006246938 | 2.13E-19    | 1.63E-17    |
| ENSMUSG00000002289 | 631.2668617 | 1.160484697 | 0.183284971 | 6.331586754 | 2.43E-10    | 6.92E-09    |
| ENSMUSG00000074635 | 76.44688741 | 1.161027867 | 0.313429702 | 3.704268808 | 0.000212001 | 0.00176412  |
| ENSMUSG00000070056 | 210.4098759 | 1.161112099 | 0.2090785   | 5.553474412 | 2.80E-08    | 5.73E-07    |
| ENSMUSG00000075543 | 506.0260959 | 1.162156465 | 0.154034291 | 7.544790552 | 4.53E-14    | 2.05E-12    |
| ENSMUSG00000077625 | 20.25919701 | 1.163249455 | 0.563145351 | 2.065629156 | 0.038863509 | 0.12533552  |
| ENSMUSG00000040584 | 3659.920824 | 1.164103684 | 0.181899842 | 6.399695953 | 1.56E-10    | 4.59E-09    |
| ENSMUSG00000064390 | 80.40430981 | 1.16457094  | 0.334904979 | 3.477317483 | 0.000506458 | 0.003751084 |
| ENSMUSG00000002458 | 337.9424987 | 1.164719475 | 0.194077025 | 6.0013259   | 1.96E-09    | 4.90E-08    |
| ENSMUSG00000062064 | 77.05889985 | 1.167808335 | 0.377601415 | 3.092701162 | 0.001983438 | 0.011707952 |
| ENSMUSG00000115276 | 110.1984446 | 1.168099537 | 0.272751316 | 4.282654083 | 1.85E-05    | 0.000206751 |
| ENSMUSG00000061313 | 3515.13186  | 1.170645771 | 0.127138433 | 9.207646704 | 3.33E-20    | 2.74E-18    |
| ENSMUSG00000072963 | 21.86041403 | 1.172130131 | 0.560032624 | 2.09296759  | 0.036352048 | 0.119078587 |
| ENSMUSG00000017868 | 35.7669751  | 1.173604596 | 0.419411648 | 2.798216503 | 0.005138566 | 0.025403492 |
| ENSMUSG00000023905 | 1461.567911 | 1.173702236 | 0.142383    | 8.243275085 | 1.68E-16    | 9.56E-15    |
| ENSMUSG00000094655 | 160.5979428 | 1.175701789 | 0.277060261 | 4.243487622 | 2.20E-05    | 0.000240462 |
| ENSMUSG00000019966 | 6047.053144 | 1.175974267 | 0.115622902 | 10.17077283 | 2.68E-24    | 3.00E-22    |
| ENSMUSG00000006711 | 533.7906358 | 1.177086821 | 0.141368938 | 8.326346945 | 8.34E-17    | 4.95E-15    |
| ENSMUSG00000107456 | 255.1890549 | 1.177545896 | 0.275414708 | 4.275537443 | 1.91E-05    | 0.000212304 |
| ENSMUSG00000074445 | 70.27562986 | 1.17835665  | 0.445721503 | 2.643706087 | 0.008200383 | 0.037102199 |
| ENSMUSG00000105264 | 536.4407198 | 1.17848224  | 0.183946047 | 6.406673365 | 1.49E-10    | 4.39E-09    |
| ENSMUSG00000055210 | 50.04927569 | 1.179129009 | 0.44161675  | 2.670027819 | 0.007584496 | 0.034837359 |
| ENSMUSG00000104239 | 44.04828154 | 1.179384833 | 0.359776973 | 3.278099829 | 0.001045084 | 0.006907395 |

|                    |             |             |             |             |             |             |
|--------------------|-------------|-------------|-------------|-------------|-------------|-------------|
| ENSMUSG00000064952 | 45.21502383 | 1.181824423 | 0.369281062 | 3.200338564 | 0.001372662 | 0.008619229 |
| ENSMUSG00000102225 | 40.70073651 | 1.182068072 | 0.403707316 | 2.92803233  | 0.003411146 | 0.018216466 |
| ENSMUSG00000109498 | 794.624282  | 1.184414199 | 0.143252098 | 8.268040887 | 1.36E-16    | 7.87E-15    |
| ENSMUSG00000097893 | 55.01115258 | 1.184512218 | 0.350752325 | 3.377061626 | 0.000732646 | 0.005107454 |
| ENSMUSG00000043487 | 321.4770356 | 1.185217514 | 0.206840638 | 5.73009987  | 1.00E-08    | 2.23E-07    |
| ENSMUSG00000022847 | 187.4486569 | 1.185943592 | 0.278114082 | 4.26423424  | 2.01E-05    | 0.000222002 |
| ENSMUSG00000037921 | 681.0402541 | 1.188028702 | 0.196272952 | 6.052941541 | 1.42E-09    | 3.62E-08    |
| ENSMUSG00000110397 | 59.39670314 | 1.188626165 | 0.342399332 | 3.471461692 | 0.000517633 | 0.003821164 |
| ENSMUSG00000103928 | 108.7175164 | 1.188699589 | 0.292026095 | 4.070525237 | 4.69E-05    | 0.000475058 |
| ENSMUSG00000102802 | 11665.73899 | 1.188717342 | 0.139842478 | 8.500402417 | 1.89E-17    | 1.21E-15    |
| ENSMUSG00000106815 | 292.3661638 | 1.189112288 | 0.195977957 | 6.067581821 | 1.30E-09    | 3.33E-08    |
| ENSMUSG00000105315 | 147.5477849 | 1.190208474 | 0.271286016 | 4.387282809 | 1.15E-05    | 0.000134716 |
| ENSMUSG00000104525 | 99.80816306 | 1.190307129 | 0.278096327 | 4.280197227 | 1.87E-05    | 0.000208524 |
| ENSMUSG00000097401 | 42.66632508 | 1.19046861  | 0.462162501 | 2.575865866 | 0.009998943 | 0.043391014 |
| ENSMUSG00000097312 | 62.71208255 | 1.190907971 | 0.508623561 | 2.341432964 | 0.019209875 | 0.072206208 |
| ENSMUSG00000108954 | 126.8504073 | 1.193941212 | 0.28613747  | 4.172613998 | 3.01E-05    | 0.000318567 |
| ENSMUSG00000028128 | 323.4335158 | 1.194007145 | 0.171621935 | 6.957194293 | 3.47E-12    | 1.27E-10    |
| ENSMUSG00000025584 | 343.4756743 | 1.194417875 | 0.24430121  | 4.889119777 | 1.01E-06    | 1.52E-05    |
| ENSMUSG00000027955 | 24.53888158 | 1.198823722 | 0.550639051 | 2.177149843 | 0.029469389 | 0.100953317 |
| ENSMUSG00000022376 | 346.704493  | 1.199297945 | 0.254569676 | 4.711079362 | 2.46E-06    | 3.40E-05    |
| ENSMUSG00000115210 | 62.13071504 | 1.203309791 | 0.329964463 | 3.646786018 | 0.000265541 | 0.00214171  |
| ENSMUSG00000094958 | 66.45086077 | 1.20354446  | 0.378671755 | 3.178331746 | 0.001481252 | 0.009173394 |
| ENSMUSG00000065728 | 15.29084298 | 1.203711941 | 0.613077083 | 1.963394123 | 0.049600396 | 0.15024972  |
| ENSMUSG00000103233 | 522.1598286 | 1.204194071 | 0.172274437 | 6.989975361 | 2.75E-12    | 1.02E-10    |
| ENSMUSG00000065847 | 70.9980155  | 1.205319647 | 0.30320505  | 3.975262443 | 7.03E-05    | 0.00067665  |
| ENSMUSG00000090925 | 254.2166309 | 1.206387904 | 0.22545735  | 5.35084753  | 8.75E-08    | 1.67E-06    |
| ENSMUSG00000030760 | 963.0704148 | 1.20679762  | 0.187912471 | 6.422126291 | 1.34E-10    | 4.00E-09    |
| ENSMUSG00000089960 | 1801.803817 | 1.208438983 | 0.206426943 | 5.85407585  | 4.80E-09    | 1.13E-07    |
| ENSMUSG00000021822 | 149.9754519 | 1.209219371 | 0.350713714 | 3.447881628 | 0.000565002 | 0.004104267 |

|                    |             |             |             |             |             |             |
|--------------------|-------------|-------------|-------------|-------------|-------------|-------------|
| ENSMUSG00000104406 | 27.47480202 | 1.209239068 | 0.469821957 | 2.573824086 | 0.01005814  | 0.043555509 |
| ENSMUSG00000105824 | 172.765859  | 1.209472888 | 0.213696131 | 5.659779059 | 1.52E-08    | 3.28E-07    |
| ENSMUSG00000040254 | 20.55836347 | 1.209691061 | 0.579665769 | 2.086876828 | 0.03689927  | 0.120235333 |
| ENSMUSG00000020447 | 4060.162346 | 1.209746811 | 0.174417404 | 6.935929442 | 4.04E-12    | 1.46E-10    |
| ENSMUSG00000037847 | 1297.161021 | 1.210246245 | 0.158958914 | 7.613578965 | 2.67E-14    | 1.23E-12    |
| ENSMUSG00000105565 | 48.96860181 | 1.210419301 | 0.395751917 | 3.058530479 | 0.002224255 | 0.012853874 |
| ENSMUSG00000108190 | 35.69186059 | 1.211655094 | 0.414884659 | 2.920462514 | 0.003495122 | 0.01854061  |
| ENSMUSG00000094050 | 33.01945033 | 1.211948816 | 0.456846994 | 2.652854966 | 0.007981416 | 0.036273396 |
| ENSMUSG00000026938 | 18.89196074 | 1.212428382 | 0.547373299 | 2.214993652 | 0.0267605   | 0.093994598 |
| ENSMUSG00000079550 | 267.8997887 | 1.212434308 | 0.1878967   | 6.452664191 | 1.10E-10    | 3.32E-09    |
| ENSMUSG00000115224 | 34.08309405 | 1.214072263 | 0.510411396 | 2.378615118 | 0.01737781  | 0.066737425 |
| ENSMUSG00000024533 | 225.2541839 | 1.214316252 | 0.224843137 | 5.400726343 | 6.64E-08    | 1.29E-06    |
| ENSMUSG00000097742 | 26.04477085 | 1.214782249 | 0.522268463 | 2.325972819 | 0.020020001 | 0.074510353 |
| ENSMUSG00000100394 | 62.24337732 | 1.216726113 | 0.339694563 | 3.58182393  | 0.000341204 | 0.002666147 |
| ENSMUSG00000081245 | 30.74861925 | 1.217583902 | 0.478918249 | 2.542362717 | 0.011010585 | 0.046782919 |
| ENSMUSG00000068246 | 52.46544656 | 1.219700918 | 0.379988124 | 3.209839573 | 0.001328091 | 0.00837843  |
| ENSMUSG00000026532 | 22.12596743 | 1.220018657 | 0.511158763 | 2.386770502 | 0.016997098 | 0.065545959 |
| ENSMUSG00000025059 | 1096.109272 | 1.222821867 | 0.205467023 | 5.95142641  | 2.66E-09    | 6.52E-08    |
| ENSMUSG00000105659 | 63.15940587 | 1.224951537 | 0.327189112 | 3.743863992 | 0.000181212 | 0.001535995 |
| ENSMUSG00000031402 | 1804.674215 | 1.225342628 | 0.160406676 | 7.63897524  | 2.19E-14    | 1.02E-12    |
| ENSMUSG00000111368 | 42.63215784 | 1.226280261 | 0.379435513 | 3.231854215 | 0.001229898 | 0.007865773 |
| ENSMUSG00000093622 | 18.03883321 | 1.226982353 | 0.581406932 | 2.110367603 | 0.034826705 | 0.11502819  |
| ENSMUSG00000071551 | 1480.265398 | 1.227847509 | 0.200888149 | 6.112095301 | 9.83E-10    | 2.56E-08    |
| ENSMUSG00000095868 | 45.44009987 | 1.22890771  | 0.407491449 | 3.015787724 | 0.002563126 | 0.014470957 |
| ENSMUSG00000000552 | 112.0654966 | 1.229085459 | 0.250954322 | 4.897646108 | 9.70E-07    | 1.46E-05    |
| ENSMUSG00000103509 | 130.5747679 | 1.230222625 | 0.245131245 | 5.018628395 | 5.20E-07    | 8.31E-06    |
| ENSMUSG00000087132 | 54.75675084 | 1.230827044 | 0.36409321  | 3.380527321 | 0.000723469 | 0.005051371 |
| ENSMUSG00000104324 | 118.5862578 | 1.230956155 | 0.355530365 | 3.462309483 | 0.000535561 | 0.003923635 |
| ENSMUSG00000065089 | 76.94105059 | 1.232527652 | 0.382644443 | 3.221078145 | 0.001277093 | 0.008119798 |

|                    |             |             |             |             |             |             |
|--------------------|-------------|-------------|-------------|-------------|-------------|-------------|
| ENSMUSG00000114431 | 86.91876045 | 1.232747402 | 0.354740482 | 3.475068291 | 0.000510723 | 0.003777659 |
| ENSMUSG00000026483 | 395.8249534 | 1.23277043  | 0.486255015 | 2.535234374 | 0.011237211 | 0.047530676 |
| ENSMUSG00000104040 | 60.29979614 | 1.235720684 | 0.325893296 | 3.791795354 | 0.000149562 | 0.001297815 |
| ENSMUSG00000082154 | 49.64054342 | 1.235932053 | 0.352901163 | 3.502204535 | 0.000461425 | 0.003460069 |
| ENSMUSG00000075703 | 6236.169157 | 1.236274764 | 0.12709617  | 9.727081169 | 2.31E-22    | 2.27E-20    |
| ENSMUSG00000082665 | 22.90111448 | 1.236409732 | 0.530698594 | 2.329777668 | 0.019817905 | 0.073955673 |
| ENSMUSG00000113894 | 42.48952091 | 1.236854198 | 0.400830744 | 3.085726874 | 0.002030552 | 0.01192499  |
| ENSMUSG00000048905 | 4576.671418 | 1.236901502 | 0.215949852 | 5.727725633 | 1.02E-08    | 2.26E-07    |
| ENSMUSG00000108799 | 23.10905743 | 1.237610386 | 0.499612553 | 2.477140292 | 0.013243983 | 0.053965662 |
| ENSMUSG00000065653 | 31.65861779 | 1.238844499 | 0.471482225 | 2.627552924 | 0.008600146 | 0.038543381 |
| ENSMUSG00000106288 | 49.08631753 | 1.239022272 | 0.36312081  | 3.412148899 | 0.000644529 | 0.004592217 |
| ENSMUSG00000042505 | 642.6526958 | 1.24074766  | 0.130934752 | 9.476075999 | 2.64E-21    | 2.37E-19    |
| ENSMUSG00000110887 | 73.21986185 | 1.246298372 | 0.447852198 | 2.782834107 | 0.005388635 | 0.02638822  |
| ENSMUSG00000027514 | 390.6312907 | 1.246691503 | 0.518929687 | 2.402428565 | 0.016286615 | 0.063453495 |
| ENSMUSG00000027712 | 372.1571899 | 1.24744288  | 0.236092758 | 5.283698204 | 1.27E-07    | 2.33E-06    |
| ENSMUSG00000062480 | 43.23551066 | 1.24782947  | 0.378586133 | 3.296025295 | 0.000980632 | 0.006537839 |
| ENSMUSG00000031342 | 56.90257332 | 1.247861068 | 0.387802048 | 3.217778435 | 0.001291876 | 0.008180045 |
| ENSMUSG00000102837 | 15.79095785 | 1.248184696 | 0.616249524 | 2.025453402 | 0.042820829 | 0.134670329 |
| ENSMUSG00000113140 | 125.5201611 | 1.248476626 | 0.233128411 | 5.355317366 | 8.54E-08    | 1.63E-06    |
| ENSMUSG00000086047 | 23.45028084 | 1.248684508 | 0.613977725 | 2.033761906 | 0.041975607 | 0.132746975 |
| ENSMUSG00000081618 | 34.66056031 | 1.248790207 | 0.523099542 | 2.387289813 | 0.016973105 | 0.065464756 |
| ENSMUSG00000086881 | 269.756128  | 1.251393489 | 0.181328029 | 6.901268914 | 5.15E-12    | 1.84E-10    |
| ENSMUSG00000107140 | 16.98308887 | 1.251987429 | 0.568494869 | 2.202284484 | 0.02764522  | 0.09618035  |
| ENSMUSG00000041268 | 686.4322931 | 1.253005506 | 0.164141697 | 7.633681941 | 2.28E-14    | 1.06E-12    |
| ENSMUSG00000013846 | 855.1508915 | 1.254652094 | 0.164434202 | 7.630116332 | 2.35E-14    | 1.09E-12    |
| ENSMUSG00000074682 | 169.5310191 | 1.255287713 | 0.285806012 | 4.392096945 | 1.12E-05    | 0.000132184 |
| ENSMUSG00000024778 | 127.743507  | 1.255521084 | 0.270098719 | 4.648378526 | 3.35E-06    | 4.47E-05    |
| ENSMUSG00000032548 | 1561.107709 | 1.257355744 | 0.161522103 | 7.784419101 | 7.00E-15    | 3.46E-13    |
| ENSMUSG00000027227 | 9270.380628 | 1.257484731 | 0.139924439 | 8.986884228 | 2.54E-19    | 1.93E-17    |

|                    |             |             |             |             |             |             |
|--------------------|-------------|-------------|-------------|-------------|-------------|-------------|
| ENSMUSG00000058624 | 2243.878417 | 1.258366534 | 0.442442399 | 2.844136403 | 0.004453198 | 0.022541775 |
| ENSMUSG00000101365 | 203.776111  | 1.259818633 | 0.235771904 | 5.343378976 | 9.12E-08    | 1.73E-06    |
| ENSMUSG00000074639 | 28.21273756 | 1.26073791  | 0.596781555 | 2.112561789 | 0.034638292 | 0.114558587 |
| ENSMUSG00000020609 | 48812.85482 | 1.262030326 | 0.153498402 | 8.221781553 | 2.01E-16    | 1.13E-14    |
| ENSMUSG00000106078 | 411.1693087 | 1.263616333 | 0.176888713 | 7.143566791 | 9.09E-13    | 3.56E-11    |
| ENSMUSG00000102786 | 43.70264042 | 1.264450522 | 0.395812663 | 3.194568142 | 0.001400402 | 0.00876273  |
| ENSMUSG00000044080 | 926.6951304 | 1.267875909 | 0.152561563 | 8.310585451 | 9.52E-17    | 5.56E-15    |
| ENSMUSG00000103747 | 321.9075229 | 1.270033915 | 0.195837894 | 6.485128523 | 8.87E-11    | 2.70E-09    |
| ENSMUSG00000109429 | 1087.236341 | 1.271847661 | 0.135827058 | 9.363728256 | 7.70E-21    | 6.63E-19    |
| ENSMUSG00000112532 | 96.91999309 | 1.27406152  | 0.3427823   | 3.716824112 | 0.000201743 | 0.001690107 |
| ENSMUSG00000085375 | 20.34689309 | 1.274120416 | 0.564607837 | 2.256646707 | 0.024030159 | 0.08630247  |
| ENSMUSG00000112637 | 286.6461698 | 1.276643762 | 0.189324512 | 6.743150953 | 1.55E-11    | 5.23E-10    |
| ENSMUSG00000025701 | 516.2258311 | 1.27679883  | 0.217564883 | 5.868588771 | 4.40E-09    | 1.04E-07    |
| ENSMUSG00000064347 | 23.27260386 | 1.279331121 | 0.604295375 | 2.117062572 | 0.034254538 | 0.113625998 |
| ENSMUSG00000029270 | 511.5875515 | 1.281525889 | 0.145267449 | 8.821837884 | 1.13E-18    | 8.13E-17    |
| ENSMUSG00000023057 | 12751.59203 | 1.281617573 | 0.184003866 | 6.965166567 | 3.28E-12    | 1.20E-10    |
| ENSMUSG00000044726 | 68.4450587  | 1.282940366 | 0.516329418 | 2.484732269 | 0.01296489  | 0.053070854 |
| ENSMUSG00000097417 | 18.7928631  | 1.283673911 | 0.597590888 | 2.148081466 | 0.031707284 | 0.106958728 |
| ENSMUSG00000040270 | 366.1423407 | 1.285120429 | 0.163724027 | 7.849308698 | 4.18E-15    | 2.13E-13    |
| ENSMUSG00000060183 | 24.04027509 | 1.286650851 | 0.552962459 | 2.326832193 | 0.019974198 | 0.074364707 |
| ENSMUSG00000049436 | 38.26186703 | 1.287575588 | 0.410200818 | 3.138890837 | 0.001695886 | 0.010278508 |
| ENSMUSG00000106063 | 43.78777341 | 1.28765216  | 0.39204406  | 3.284457772 | 0.001021788 | 0.006765706 |
| ENSMUSG00000020253 | 543.1988641 | 1.287783098 | 0.142022707 | 9.06744508  | 1.22E-19    | 9.47E-18    |
| ENSMUSG00000093424 | 38.36219587 | 1.288517769 | 0.479385115 | 2.687855189 | 0.007191258 | 0.033341421 |
| ENSMUSG00000094306 | 20.03264191 | 1.289015754 | 0.655824996 | 1.965487381 | 0.049357855 | 0.149759118 |
| ENSMUSG00000097166 | 22.88113845 | 1.289680273 | 0.554721424 | 2.324915203 | 0.020076495 | 0.074683221 |
| ENSMUSG00000030921 | 113.2952553 | 1.291481649 | 0.319624471 | 4.040621934 | 5.33E-05    | 0.000530267 |
| ENSMUSG00000074261 | 287.3258587 | 1.292076769 | 0.248747629 | 5.194327972 | 2.05E-07    | 3.61E-06    |
| ENSMUSG00000031207 | 62.43690274 | 1.292913413 | 0.508200396 | 2.544101548 | 0.010955923 | 0.046609698 |

|                    |             |             |             |             |             |             |
|--------------------|-------------|-------------|-------------|-------------|-------------|-------------|
| ENSMUSG00000071550 | 65.02392541 | 1.293135925 | 0.370920085 | 3.48629254  | 0.000489765 | 0.003645611 |
| ENSMUSG00000039652 | 419.829642  | 1.293412088 | 0.207700434 | 6.227296019 | 4.75E-10    | 1.30E-08    |
| ENSMUSG00000024885 | 469.0064025 | 1.294342842 | 0.208368266 | 6.211804073 | 5.24E-10    | 1.42E-08    |
| ENSMUSG00000103818 | 29.1171212  | 1.295828127 | 0.450045021 | 2.879329992 | 0.003985211 | 0.020582258 |
| ENSMUSG00000077167 | 209.1455749 | 1.295845832 | 0.278774983 | 4.648357682 | 3.35E-06    | 4.47E-05    |
| ENSMUSG00000109787 | 15.9493494  | 1.296145915 | 0.628480924 | 2.062347265 | 0.039174686 | 0.12606561  |
| ENSMUSG00000083951 | 18.55430464 | 1.296847454 | 0.55608993  | 2.33208225  | 0.019696365 | 0.073563662 |
| ENSMUSG00000097387 | 26.86116427 | 1.300613047 | 0.55612458  | 2.338708076 | 0.019350547 | 0.072539342 |
| ENSMUSG00000056904 | 52.48299937 | 1.301083587 | 0.373979817 | 3.479020869 | 0.000503249 | 0.003733521 |
| ENSMUSG00000074634 | 267.6525501 | 1.302049806 | 0.253708771 | 5.132064617 | 2.87E-07    | 4.87E-06    |
| ENSMUSG00000035849 | 45.64331741 | 1.303954758 | 0.503237977 | 2.591129482 | 0.009566149 | 0.041896051 |
| ENSMUSG00000114443 | 64.46444435 | 1.304374526 | 0.331225433 | 3.938026478 | 8.22E-05    | 0.00077403  |
| ENSMUSG00000079645 | 23.8480441  | 1.306742926 | 0.489106401 | 2.671694591 | 0.00754693  | 0.03468757  |
| ENSMUSG00000028158 | 22432.09938 | 1.30792539  | 0.138845301 | 9.420019141 | 4.51E-21    | 4.01E-19    |
| ENSMUSG00000114470 | 34.73940608 | 1.308842031 | 0.420208491 | 3.114744372 | 0.001841044 | 0.010997894 |
| ENSMUSG00000025287 | 374.0754003 | 1.308931586 | 0.165150562 | 7.925686548 | 2.27E-15    | 1.18E-13    |
| ENSMUSG00000106223 | 26.23864476 | 1.309530757 | 0.482108532 | 2.71625717  | 0.006602461 | 0.031109546 |
| ENSMUSG00000103291 | 393.4220947 | 1.309930674 | 0.21361551  | 6.132188959 | 8.67E-10    | 2.28E-08    |
| ENSMUSG00000026589 | 5783.47307  | 1.312623367 | 0.136831736 | 9.592974616 | 8.56E-22    | 8.19E-20    |
| ENSMUSG00000064600 | 42.18827192 | 1.315958364 | 0.423105291 | 3.110238497 | 0.001869363 | 0.011140746 |
| ENSMUSG00000047342 | 121.3881561 | 1.316531434 | 0.249948048 | 5.267220312 | 1.39E-07    | 2.53E-06    |
| ENSMUSG00000021125 | 3135.831764 | 1.316616309 | 0.215161509 | 6.119200002 | 9.40E-10    | 2.46E-08    |
| ENSMUSG00000113660 | 30.48471841 | 1.31669388  | 0.54172327  | 2.43056548  | 0.015075282 | 0.059757174 |
| ENSMUSG00000049119 | 913.7305541 | 1.317641046 | 0.154619828 | 8.521811589 | 1.57E-17    | 1.02E-15    |
| ENSMUSG00000081488 | 186.1741021 | 1.318027967 | 0.23297196  | 5.657453234 | 1.54E-08    | 3.32E-07    |
| ENSMUSG00000080370 | 14.66059402 | 1.318644502 | 0.627875866 | 2.100167522 | 0.035714107 | 0.117363905 |
| ENSMUSG00000114016 | 27.72451109 | 1.320065934 | 0.460349735 | 2.867528388 | 0.004136917 | 0.021277072 |
| ENSMUSG00000103701 | 38.37552404 | 1.32051774  | 0.430839927 | 3.064984595 | 0.002176812 | 0.012615667 |
| ENSMUSG00000110088 | 26.89398743 | 1.320562984 | 0.497072861 | 2.656678906 | 0.007891457 | 0.035952477 |



|                    |             |             |             |             |             |             |
|--------------------|-------------|-------------|-------------|-------------|-------------|-------------|
| ENSMUSG00000106874 | 365.3040461 | 1.320987842 | 0.165857238 | 7.964607728 | 1.66E-15    | 8.74E-14    |
| ENSMUSG00000112144 | 41.22017038 | 1.321167255 | 0.416290979 | 3.173662947 | 0.001505284 | 0.009296646 |
| ENSMUSG00000019997 | 164.1524868 | 1.324061477 | 0.32001964  | 4.137438175 | 3.51E-05    | 0.000364798 |
| ENSMUSG00000029195 | 71.53833639 | 1.328631511 | 0.431543133 | 3.07879192  | 0.002078418 | 0.012149619 |
| ENSMUSG00000045763 | 85.85167008 | 1.328790244 | 0.33230582  | 3.998696879 | 6.37E-05    | 0.000620804 |
| ENSMUSG00000052889 | 21.08394519 | 1.330868469 | 0.542046161 | 2.455267772 | 0.014077968 | 0.05672529  |
| ENSMUSG00000104459 | 16.88482755 | 1.330920358 | 0.604711423 | 2.200918168 | 0.027741817 | 0.096426165 |
| ENSMUSG00000106251 | 55.43488378 | 1.331028189 | 0.343827845 | 3.871205333 | 0.000108299 | 0.000983347 |
| ENSMUSG00000108169 | 85.90624309 | 1.331128503 | 0.323390605 | 4.11616318  | 3.85E-05    | 0.000396266 |
| ENSMUSG00000084899 | 117.5023637 | 1.332939975 | 0.255241601 | 5.222267726 | 1.77E-07    | 3.16E-06    |
| ENSMUSG00000018211 | 113.5346869 | 1.333303835 | 0.287781644 | 4.633039893 | 3.60E-06    | 4.78E-05    |
| ENSMUSG00000111189 | 42.39401982 | 1.333505789 | 0.42622262  | 3.128660298 | 0.001756052 | 0.010567111 |
| ENSMUSG00000027173 | 686.225831  | 1.333622748 | 0.176277215 | 7.565485692 | 3.86E-14    | 1.76E-12    |
| ENSMUSG00000064451 | 49.28525056 | 1.335722785 | 0.376579309 | 3.54698931  | 0.00038966  | 0.002992812 |
| ENSMUSG00000039115 | 123.3698971 | 1.336043109 | 0.321245839 | 4.158942925 | 3.20E-05    | 0.000335537 |
| ENSMUSG00000102970 | 33.88130571 | 1.336158851 | 0.466814746 | 2.862289297 | 0.004205928 | 0.021557436 |
| ENSMUSG00000104020 | 47.64031595 | 1.336465889 | 0.413679217 | 3.230681728 | 0.001234954 | 0.007890436 |
| ENSMUSG00000106290 | 192.2903755 | 1.336713414 | 0.21281964  | 6.280968314 | 3.36E-10    | 9.43E-09    |
| ENSMUSG00000065687 | 78.38684873 | 1.337016076 | 0.295319392 | 4.527356191 | 5.97E-06    | 7.54E-05    |
| ENSMUSG00000021253 | 20.41955713 | 1.337493815 | 0.544382128 | 2.456902507 | 0.014014071 | 0.05653542  |
| ENSMUSG00000102243 | 51.3652243  | 1.341081753 | 0.342582281 | 3.914626724 | 9.05E-05    | 0.000840294 |
| ENSMUSG00000035775 | 4563.588481 | 1.342199339 | 0.228629638 | 5.870627053 | 4.34E-09    | 1.03E-07    |
| ENSMUSG00000113557 | 41.66110973 | 1.342413735 | 0.446577951 | 3.006000925 | 0.002647082 | 0.014862179 |
| ENSMUSG00000109302 | 67.95359988 | 1.342751399 | 0.330246862 | 4.065902067 | 4.78E-05    | 0.000483478 |
| ENSMUSG00000102349 | 41.4886775  | 1.342904441 | 0.525520898 | 2.555377808 | 0.01060726  | 0.045412267 |
| ENSMUSG00000030157 | 5840.39646  | 1.344412932 | 0.122701493 | 10.95677726 | 6.17E-28    | 8.81E-26    |
| ENSMUSG00000111792 | 35.66039213 | 1.345832068 | 0.42217097  | 3.187883971 | 0.00143318  | 0.008925443 |
| ENSMUSG00000040613 | 1007.381479 | 1.347106741 | 0.186827225 | 7.21044131  | 5.58E-13    | 2.24E-11    |
| ENSMUSG00000064373 | 4279.410871 | 1.348575408 | 0.216420165 | 6.231283527 | 4.63E-10    | 1.27E-08    |

|                    |             |             |             |             |             |             |
|--------------------|-------------|-------------|-------------|-------------|-------------|-------------|
| ENSMUSG00000027297 | 204.1345957 | 1.350135663 | 0.205990499 | 6.554358908 | 5.59E-11    | 1.74E-09    |
| ENSMUSG00000102147 | 96.69130861 | 1.350290126 | 0.282528026 | 4.779313924 | 1.76E-06    | 2.52E-05    |
| ENSMUSG00000093858 | 42.5891265  | 1.351432077 | 0.401803951 | 3.363411621 | 0.000769855 | 0.005318628 |
| ENSMUSG00000000948 | 627.3929532 | 1.35209033  | 0.141763276 | 9.537662866 | 1.46E-21    | 1.37E-19    |
| ENSMUSG00000114755 | 158.024351  | 1.352410102 | 0.263124778 | 5.139805206 | 2.75E-07    | 4.69E-06    |
| ENSMUSG00000092887 | 55.88522158 | 1.35324779  | 0.358117638 | 3.778780058 | 0.000157599 | 0.00135699  |
| ENSMUSG00000084934 | 268.8937414 | 1.354965293 | 0.180348389 | 7.513043527 | 5.78E-14    | 2.57E-12    |
| ENSMUSG00000005553 | 153.3165262 | 1.355850956 | 0.255460636 | 5.307475063 | 1.11E-07    | 2.06E-06    |
| ENSMUSG00000019577 | 960.2087457 | 1.356378972 | 0.238530037 | 5.686407419 | 1.30E-08    | 2.83E-07    |
| ENSMUSG00000104798 | 130.9517121 | 1.357147861 | 0.237129008 | 5.723246895 | 1.05E-08    | 2.32E-07    |
| ENSMUSG00000033538 | 2849.37634  | 1.357597447 | 0.154732875 | 8.773813879 | 1.73E-18    | 1.22E-16    |
| ENSMUSG00000070777 | 510.9213027 | 1.357981115 | 0.463101998 | 2.932358577 | 0.003363981 | 0.018016364 |
| ENSMUSG00000097751 | 27.84599805 | 1.358805566 | 0.515043823 | 2.638232913 | 0.008333932 | 0.037592034 |
| ENSMUSG00000031377 | 309.183281  | 1.360869008 | 0.255794911 | 5.320156688 | 1.04E-07    | 1.94E-06    |
| ENSMUSG00000089965 | 16.01915524 | 1.36159726  | 0.625405156 | 2.177144284 | 0.029469804 | 0.100953317 |
| ENSMUSG00000104078 | 59.42884763 | 1.361858127 | 0.370320557 | 3.677511552 | 0.00023552  | 0.001931008 |
| ENSMUSG00000064372 | 655.1601065 | 1.36241139  | 0.25841426  | 5.272198942 | 1.35E-07    | 2.46E-06    |
| ENSMUSG00000104116 | 137.1364532 | 1.362788332 | 0.250036514 | 5.450357259 | 5.03E-08    | 9.96E-07    |
| ENSMUSG00000075602 | 30.80759514 | 1.362870081 | 0.637741405 | 2.137026184 | 0.032595862 | 0.109525436 |
| ENSMUSG00000087424 | 62.66066382 | 1.363040146 | 0.352976407 | 3.861561614 | 0.000112665 | 0.001015986 |
| ENSMUSG00000093289 | 43.25693942 | 1.365546124 | 0.389132587 | 3.509205263 | 0.000449448 | 0.003385052 |
| ENSMUSG00000022265 | 2296.832215 | 1.366245077 | 0.11425391  | 11.95797216 | 5.90E-33    | 1.21E-30    |
| ENSMUSG00000049866 | 2932.200551 | 1.36663905  | 0.169116133 | 8.081068476 | 6.42E-16    | 3.49E-14    |
| ENSMUSG00000108447 | 63.98637371 | 1.368455289 | 0.340342001 | 4.02082401  | 5.80E-05    | 0.000570509 |
| ENSMUSG00000103385 | 64.21463988 | 1.368924174 | 0.321292425 | 4.260679892 | 2.04E-05    | 0.000225115 |
| ENSMUSG00000026335 | 2181.662563 | 1.369354392 | 0.119905263 | 11.42030261 | 3.31E-30    | 5.59E-28    |
| ENSMUSG00000031805 | 2252.987762 | 1.372375749 | 0.193398992 | 7.096085333 | 1.28E-12    | 4.94E-11    |
| ENSMUSG00000102369 | 17.75521177 | 1.377466964 | 0.584540951 | 2.356493519 | 0.01844839  | 0.069965757 |
| ENSMUSG00000021190 | 3067.46491  | 1.378796147 | 0.515095818 | 2.676776048 | 0.00743343  | 0.034278935 |

|                    |             |             |             |             |             |             |
|--------------------|-------------|-------------|-------------|-------------|-------------|-------------|
| ENSMUSG00000087662 | 37.06853756 | 1.379205127 | 0.491275022 | 2.80739925  | 0.00499433  | 0.02481144  |
| ENSMUSG00000079355 | 55.65066847 | 1.379961386 | 0.426669374 | 3.234263976 | 0.001219567 | 0.007810901 |
| ENSMUSG00000071324 | 33.55434423 | 1.380628315 | 0.43187034  | 3.196858375 | 0.001389331 | 0.008698375 |
| ENSMUSG00000022562 | 924.787752  | 1.381022479 | 0.188209046 | 7.337705127 | 2.17E-13    | 8.97E-12    |
| ENSMUSG00000031647 | 103.1958103 | 1.382361424 | 0.283874703 | 4.869618206 | 1.12E-06    | 1.66E-05    |
| ENSMUSG00000040473 | 190.6168513 | 1.386019962 | 0.234905924 | 5.900319328 | 3.63E-09    | 8.77E-08    |
| ENSMUSG00000030643 | 296.2939784 | 1.387644932 | 0.281250184 | 4.933845417 | 8.06E-07    | 1.24E-05    |
| ENSMUSG00000083679 | 15.15968213 | 1.387883641 | 0.605345239 | 2.292714227 | 0.021864463 | 0.080011194 |
| ENSMUSG00000035818 | 111.1198342 | 1.388365412 | 0.335158367 | 4.14241609  | 3.44E-05    | 0.000357801 |
| ENSMUSG00000024713 | 18520.31114 | 1.388661117 | 0.134416745 | 10.33101282 | 5.10E-25    | 6.08E-23    |
| ENSMUSG00000077505 | 46.99199941 | 1.388910688 | 0.426111847 | 3.259497944 | 0.001116096 | 0.007284183 |
| ENSMUSG00000005125 | 7346.346209 | 1.38921827  | 0.372693503 | 3.727508685 | 0.000193382 | 0.001626173 |
| ENSMUSG00000088856 | 133.5499127 | 1.389398169 | 0.310017472 | 4.481676984 | 7.41E-06    | 9.11E-05    |
| ENSMUSG00000103808 | 65.52587958 | 1.389531996 | 0.348371867 | 3.988645835 | 6.65E-05    | 0.000645724 |
| ENSMUSG00000053830 | 23.97866004 | 1.392658251 | 0.555297887 | 2.507948045 | 0.012143452 | 0.050402219 |
| ENSMUSG00000082070 | 18.23643614 | 1.394587633 | 0.594174653 | 2.347100514 | 0.01892015  | 0.071319972 |
| ENSMUSG00000114945 | 364.8527647 | 1.395880558 | 0.15698491  | 8.891813577 | 6.01E-19    | 4.40E-17    |
| ENSMUSG00000047798 | 265.5628639 | 1.397494751 | 0.255875335 | 5.461623524 | 4.72E-08    | 9.38E-07    |
| ENSMUSG00000113577 | 26.87974028 | 1.397795281 | 0.508973471 | 2.746302827 | 0.00602711  | 0.028824917 |
| ENSMUSG00000065434 | 39.29181049 | 1.398381589 | 0.399239373 | 3.502614433 | 0.000460716 | 0.003455911 |
| ENSMUSG00000035513 | 19.60614208 | 1.400698504 | 0.59050154  | 2.372048858 | 0.017689751 | 0.067632289 |
| ENSMUSG00000054793 | 18.32665182 | 1.402550481 | 0.586092405 | 2.393053502 | 0.016708804 | 0.064668457 |
| ENSMUSG00000020709 | 544.2262191 | 1.403563774 | 0.2022413   | 6.940045246 | 3.92E-12    | 1.42E-10    |
| ENSMUSG00000110411 | 359.1920691 | 1.403825521 | 0.205436914 | 6.83336549  | 8.29E-12    | 2.88E-10    |
| ENSMUSG00000045672 | 119.7922875 | 1.403896067 | 0.23987797  | 5.852542731 | 4.84E-09    | 1.14E-07    |
| ENSMUSG00000108633 | 39.7912893  | 1.404119121 | 0.391768109 | 3.584056709 | 0.000338299 | 0.002648086 |
| ENSMUSG00000051295 | 35.35174065 | 1.404879164 | 0.480675755 | 2.922716921 | 0.003469918 | 0.0184464   |
| ENSMUSG00000091721 | 706.4275186 | 1.404887744 | 0.200080341 | 7.021618115 | 2.19E-12    | 8.18E-11    |
| ENSMUSG00000025283 | 7050.554864 | 1.405398582 | 0.140462982 | 10.00547306 | 1.44E-23    | 1.50E-21    |

|                    |             |             |             |             |             |             |
|--------------------|-------------|-------------|-------------|-------------|-------------|-------------|
| ENSMUSG00000056569 | 54.0762014  | 1.40643788  | 0.392505374 | 3.58323216  | 0.000339369 | 0.002655035 |
| ENSMUSG00000024548 | 865.5946347 | 1.406674126 | 0.13961489  | 10.07538754 | 7.10E-24    | 7.84E-22    |
| ENSMUSG00000026678 | 32.85459099 | 1.407253122 | 0.434028059 | 3.24230909  | 0.001185654 | 0.007637568 |
| ENSMUSG00000112084 | 17.22379302 | 1.408246749 | 0.663428672 | 2.122679965 | 0.033780679 | 0.112321891 |
| ENSMUSG00000103016 | 14.82977547 | 1.409389605 | 0.676396544 | 2.083673574 | 0.03718987  | 0.120881982 |
| ENSMUSG00000079110 | 54.78631112 | 1.409659983 | 0.371144612 | 3.798142118 | 0.000145785 | 0.001268987 |
| ENSMUSG00000114749 | 76.78496208 | 1.410456166 | 0.304569923 | 4.630976534 | 3.64E-06    | 4.83E-05    |
| ENSMUSG00000102556 | 50.7401401  | 1.410547496 | 0.358452876 | 3.935098843 | 8.32E-05    | 0.000782534 |
| ENSMUSG00000039899 | 1650.476457 | 1.410848731 | 0.159996215 | 8.818013165 | 1.17E-18    | 8.33E-17    |
| ENSMUSG00000067235 | 890.8833035 | 1.412764937 | 0.177475532 | 7.960336399 | 1.72E-15    | 9.02E-14    |
| ENSMUSG00000037440 | 685.0005225 | 1.415420276 | 0.227400174 | 6.224358815 | 4.84E-10    | 1.32E-08    |
| ENSMUSG00000048763 | 137.8139724 | 1.417094169 | 0.255361893 | 5.549356459 | 2.87E-08    | 5.86E-07    |
| ENSMUSG00000018387 | 992.6511064 | 1.418457247 | 0.118266885 | 11.99369754 | 3.83E-33    | 8.07E-31    |
| ENSMUSG00000097584 | 62.38532491 | 1.419107443 | 0.340635283 | 4.166061216 | 3.10E-05    | 0.000326464 |
| ENSMUSG00000020473 | 44.79777772 | 1.419347947 | 0.416867016 | 3.404797916 | 0.00066213  | 0.004702601 |
| ENSMUSG00000107813 | 136.1116974 | 1.420076666 | 0.301253121 | 4.713898598 | 2.43E-06    | 3.36E-05    |
| ENSMUSG00000035798 | 2322.361762 | 1.420181684 | 0.150900211 | 9.411396259 | 4.90E-21    | 4.33E-19    |
| ENSMUSG00000058952 | 3099.137155 | 1.420485975 | 0.197434405 | 7.194723614 | 6.26E-13    | 2.49E-11    |
| ENSMUSG00000017688 | 7062.442835 | 1.420826402 | 0.136390321 | 10.41735506 | 2.07E-25    | 2.53E-23    |
| ENSMUSG00000026003 | 7001.673841 | 1.421793306 | 0.199782178 | 7.116717416 | 1.11E-12    | 4.29E-11    |
| ENSMUSG00000114812 | 18.47173124 | 1.421797075 | 0.568686376 | 2.500142669 | 0.01241433  | 0.051221457 |
| ENSMUSG00000038594 | 71.68953693 | 1.42216048  | 0.318448659 | 4.465901931 | 7.97E-06    | 9.73E-05    |
| ENSMUSG00000078496 | 20.4527705  | 1.422538516 | 0.537341599 | 2.647363465 | 0.008112211 | 0.036762938 |
| ENSMUSG00000112820 | 12.40189048 | 1.4228809   | 0.681995468 | 2.086349494 | 0.036946976 | 0.120320462 |
| ENSMUSG00000026786 | 161.8035302 | 1.424366613 | 0.28952282  | 4.919704134 | 8.67E-07    | 1.32E-05    |
| ENSMUSG00000021198 | 99.88296026 | 1.425602335 | 0.277897866 | 5.129950636 | 2.90E-07    | 4.92E-06    |
| ENSMUSG00000114190 | 15.23966202 | 1.426883185 | 0.682761519 | 2.08987054  | 0.036629431 | 0.11956571  |
| ENSMUSG00000021411 | 336.8903216 | 1.427083017 | 0.310839535 | 4.591060202 | 4.41E-06    | 5.77E-05    |
| ENSMUSG00000032449 | 6174.865911 | 1.429079194 | 0.171884572 | 8.314179565 | 9.24E-17    | 5.42E-15    |

|                    |             |             |             |             |             |             |
|--------------------|-------------|-------------|-------------|-------------|-------------|-------------|
| ENSMUSG00000036960 | 57.07830227 | 1.429651844 | 0.333309712 | 4.289259487 | 1.79E-05    | 0.000202016 |
| ENSMUSG00000110597 | 66.62875172 | 1.430764518 | 0.389509598 | 3.673245856 | 0.000239489 | 0.001959223 |
| ENSMUSG00000053897 | 3951.77928  | 1.433134442 | 0.112948088 | 12.68843474 | 6.85E-37    | 1.76E-34    |
| ENSMUSG00000070044 | 2204.961951 | 1.433752958 | 0.166864238 | 8.592332168 | 8.52E-18    | 5.69E-16    |
| ENSMUSG00000089728 | 21.12122455 | 1.437334681 | 0.632867295 | 2.271147036 | 0.023138078 | 0.083698668 |
| ENSMUSG00000105677 | 49.08024485 | 1.438160095 | 0.354740763 | 4.054115694 | 5.03E-05    | 0.00050485  |
| ENSMUSG00000102630 | 12.17191985 | 1.440123363 | 0.69145622  | 2.082739763 | 0.037274951 | 0.121105577 |
| ENSMUSG00000051079 | 495.7670015 | 1.440737484 | 0.207028127 | 6.959138865 | 3.42E-12    | 1.25E-10    |
| ENSMUSG00000086417 | 14.26061195 | 1.442443238 | 0.653963553 | 2.205693624 | 0.027405459 | 0.095510101 |
| ENSMUSG00000001663 | 1996.940596 | 1.443167871 | 0.150456046 | 9.591956666 | 8.64E-22    | 8.24E-20    |
| ENSMUSG00000042041 | 352.5867888 | 1.446191766 | 0.281752295 | 5.132848218 | 2.85E-07    | 4.86E-06    |
| ENSMUSG00000112338 | 23.82780397 | 1.447234985 | 0.516731664 | 2.800747634 | 0.005098437 | 0.025233078 |
| ENSMUSG00000021850 | 223.3974316 | 1.447974493 | 0.281563993 | 5.142612446 | 2.71E-07    | 4.63E-06    |
| ENSMUSG00000034164 | 52.21996856 | 1.449162851 | 0.444965367 | 3.256799204 | 0.001126761 | 0.007335875 |
| ENSMUSG00000102732 | 117.5993627 | 1.454303283 | 0.255827766 | 5.684696797 | 1.31E-08    | 2.85E-07    |
| ENSMUSG00000020080 | 4855.396242 | 1.45446945  | 0.164891135 | 8.820786201 | 1.14E-18    | 8.18E-17    |
| ENSMUSG00000021208 | 8431.511685 | 1.454607659 | 0.161305788 | 9.017702798 | 1.92E-19    | 1.48E-17    |
| ENSMUSG00000020839 | 21.07665405 | 1.454942274 | 0.523168431 | 2.781020775 | 0.005418827 | 0.026501153 |
| ENSMUSG00000115333 | 27.59051306 | 1.456638394 | 0.556196536 | 2.618927481 | 0.00882067  | 0.039310502 |
| ENSMUSG00000114610 | 61.33744102 | 1.457320691 | 0.353226179 | 4.125743719 | 3.70E-05    | 0.000382239 |
| ENSMUSG00000032024 | 31.06432568 | 1.457406364 | 0.490416035 | 2.971775514 | 0.002960831 | 0.016255413 |
| ENSMUSG00000105655 | 82.72907404 | 1.460881826 | 0.284792803 | 5.129630415 | 2.90E-07    | 4.92E-06    |
| ENSMUSG00000037499 | 739.1132324 | 1.46152749  | 0.137433103 | 10.63446478 | 2.06E-26    | 2.61E-24    |
| ENSMUSG00000032661 | 220.1603252 | 1.461813551 | 0.331037174 | 4.415859209 | 1.01E-05    | 0.000119791 |
| ENSMUSG00000064984 | 37.9797332  | 1.464629747 | 0.402618254 | 3.637762903 | 0.000275016 | 0.002210938 |
| ENSMUSG00000090191 | 107.1436817 | 1.465516223 | 0.264899344 | 5.532351279 | 3.16E-08    | 6.42E-07    |
| ENSMUSG00000077737 | 24.3904614  | 1.467696977 | 0.486157281 | 3.018975614 | 0.002536309 | 0.014348614 |
| ENSMUSG00000081520 | 20.27076427 | 1.469365653 | 0.564224359 | 2.604222292 | 0.009208301 | 0.040665338 |
| ENSMUSG00000103497 | 27.54740823 | 1.470003254 | 0.557594975 | 2.636328017 | 0.008380867 | 0.037735054 |

|                    |             |             |             |             |             |             |
|--------------------|-------------|-------------|-------------|-------------|-------------|-------------|
| ENSMUSG00000030769 | 333.8577028 | 1.471057512 | 0.292661461 | 5.026481826 | 5.00E-07    | 8.03E-06    |
| ENSMUSG00000029248 | 49.85036371 | 1.471794713 | 0.400299911 | 3.676730056 | 0.000236243 | 0.001935507 |
| ENSMUSG00000064647 | 47.30265335 | 1.473058541 | 0.373797041 | 3.940797759 | 8.12E-05    | 0.00076676  |
| ENSMUSG00000109539 | 81.14784098 | 1.47428772  | 0.323188307 | 4.561698832 | 5.07E-06    | 6.56E-05    |
| ENSMUSG00000103784 | 22.9106368  | 1.474538385 | 0.497987531 | 2.960994587 | 0.003066473 | 0.016744716 |
| ENSMUSG00000026817 | 190.7827308 | 1.474863599 | 0.247119574 | 5.968218452 | 2.40E-09    | 5.94E-08    |
| ENSMUSG00000108991 | 60.16149656 | 1.474972104 | 0.324021801 | 4.552076735 | 5.31E-06    | 6.80E-05    |
| ENSMUSG00000020067 | 10.41090111 | 1.475919804 | 0.752969761 | 1.960131576 | 0.049980413 | 0.151045592 |
| ENSMUSG00000102172 | 15.84489378 | 1.476851597 | 0.641162841 | 2.30339549  | 0.021256601 | 0.078276662 |
| ENSMUSG00000107534 | 34.77293808 | 1.478533921 | 0.41913056  | 3.527621373 | 0.000419311 | 0.00319149  |
| ENSMUSG00000033705 | 188.1587498 | 1.478894632 | 0.321210741 | 4.60412571  | 4.14E-06    | 5.46E-05    |
| ENSMUSG00000076448 | 23.65528616 | 1.480358634 | 0.510923737 | 2.897416048 | 0.003762504 | 0.019641294 |
| ENSMUSG00000085399 | 67.47915488 | 1.48161924  | 0.335365692 | 4.417921324 | 9.97E-06    | 0.000118718 |
| ENSMUSG00000026586 | 45.64095201 | 1.483635473 | 0.441444511 | 3.360865148 | 0.000776988 | 0.005357946 |
| ENSMUSG00000044317 | 18.27809062 | 1.485105862 | 0.592711938 | 2.505611525 | 0.012223984 | 0.05065163  |
| ENSMUSG00000047735 | 1796.049239 | 1.486003567 | 0.200132916 | 7.425083269 | 1.13E-13    | 4.82E-12    |
| ENSMUSG00000000555 | 1578.758922 | 1.487196987 | 0.124069513 | 11.98680446 | 4.17E-33    | 8.68E-31    |
| ENSMUSG00000106211 | 46.18304988 | 1.487839201 | 0.397604689 | 3.742006173 | 0.000182557 | 0.001544463 |
| ENSMUSG00000033715 | 1639.372792 | 1.488513626 | 0.374355466 | 3.976203799 | 7.00E-05    | 0.000674561 |
| ENSMUSG00000020120 | 95.81913195 | 1.488846576 | 0.280720261 | 5.303666249 | 1.13E-07    | 2.11E-06    |
| ENSMUSG00000056515 | 112.2430524 | 1.489694944 | 0.262770718 | 5.669181705 | 1.43E-08    | 3.11E-07    |
| ENSMUSG00000112759 | 31.40938454 | 1.491724698 | 0.522339059 | 2.855855161 | 0.004292109 | 0.021873473 |
| ENSMUSG00000004933 | 955.5604729 | 1.49232098  | 0.189197344 | 7.887642351 | 3.08E-15    | 1.58E-13    |
| ENSMUSG00000081755 | 450.7576019 | 1.495731787 | 0.200119799 | 7.474181926 | 7.77E-14    | 3.40E-12    |
| ENSMUSG00000090231 | 501.912881  | 1.495905123 | 0.1842092   | 8.120686262 | 4.64E-16    | 2.53E-14    |
| ENSMUSG00000073144 | 14.75874021 | 1.497883641 | 0.722255561 | 2.073896999 | 0.038088878 | 0.123265138 |
| ENSMUSG00000006576 | 77.00428688 | 1.499851596 | 0.334998285 | 4.477191865 | 7.56E-06    | 9.29E-05    |
| ENSMUSG00000091507 | 22.2862727  | 1.500479845 | 0.574757345 | 2.610631876 | 0.009037512 | 0.040044815 |
| ENSMUSG00000089662 | 36.80591875 | 1.500677037 | 0.427161667 | 3.513136019 | 0.000442851 | 0.003342137 |

|                    |             |             |             |             |             |             |
|--------------------|-------------|-------------|-------------|-------------|-------------|-------------|
| ENSMUSG00000024268 | 22.97443381 | 1.503935098 | 0.544843244 | 2.760307878 | 0.005774691 | 0.02787893  |
| ENSMUSG00000049799 | 213.0514119 | 1.505780358 | 0.252039131 | 5.974391175 | 2.31E-09    | 5.74E-08    |
| ENSMUSG00000032377 | 27.07335518 | 1.506697448 | 0.495250524 | 3.042293496 | 0.002347829 | 0.013442599 |
| ENSMUSG00000090386 | 124.5281636 | 1.508212358 | 0.311536104 | 4.841212113 | 1.29E-06    | 1.90E-05    |
| ENSMUSG00000024940 | 81.15240115 | 1.508968397 | 0.385446611 | 3.914857088 | 9.05E-05    | 0.00084002  |
| ENSMUSG00000037946 | 241.6828037 | 1.510642388 | 0.221976402 | 6.805418826 | 1.01E-11    | 3.45E-10    |
| ENSMUSG00000021187 | 663.5911639 | 1.511604548 | 0.265554952 | 5.692247627 | 1.25E-08    | 2.74E-07    |
| ENSMUSG00000027875 | 11017.19328 | 1.511906558 | 0.097677746 | 15.47851602 | 4.85E-54    | 2.40E-51    |
| ENSMUSG00000085620 | 19.41439828 | 1.512954491 | 0.614281631 | 2.462965542 | 0.013779316 | 0.055790218 |
| ENSMUSG00000009646 | 1082.434177 | 1.51699617  | 0.173187819 | 8.759254424 | 1.97E-18    | 1.38E-16    |
| ENSMUSG00000101778 | 48.59068035 | 1.518453835 | 0.386658578 | 3.927117934 | 8.60E-05    | 0.00080589  |
| ENSMUSG00000103391 | 63.74466317 | 1.522491663 | 0.336290173 | 4.527315357 | 5.97E-06    | 7.54E-05    |
| ENSMUSG00000002475 | 1750.33883  | 1.522560342 | 0.138973545 | 10.9557567  | 6.24E-28    | 8.86E-26    |
| ENSMUSG00000027796 | 308.5739149 | 1.523620626 | 0.232401609 | 6.555981411 | 5.53E-11    | 1.72E-09    |
| ENSMUSG00000028755 | 4233.605265 | 1.524251292 | 0.155492953 | 9.802703371 | 1.10E-22    | 1.10E-20    |
| ENSMUSG00000021730 | 563.3904587 | 1.524406319 | 0.15552176  | 9.801884443 | 1.11E-22    | 1.11E-20    |
| ENSMUSG00000103922 | 17.09031216 | 1.526259339 | 0.762785027 | 2.000903643 | 0.045402775 | 0.140883162 |
| ENSMUSG00000074896 | 84.56906272 | 1.527810004 | 0.423971806 | 3.603565102 | 0.000313882 | 0.002483109 |
| ENSMUSG00000052852 | 35.57985001 | 1.531343513 | 0.437887912 | 3.497113011 | 0.000470323 | 0.003518505 |
| ENSMUSG00000082928 | 15.96517027 | 1.531671199 | 0.627113366 | 2.442415169 | 0.014589358 | 0.058349582 |
| ENSMUSG00000112816 | 85.78679613 | 1.531968281 | 0.286177119 | 5.353217217 | 8.64E-08    | 1.65E-06    |
| ENSMUSG00000103622 | 15.39610917 | 1.532136587 | 0.682619836 | 2.244494676 | 0.024800591 | 0.088478321 |
| ENSMUSG00000031884 | 15.75547884 | 1.532442527 | 0.614377415 | 2.494301531 | 0.012620528 | 0.051889823 |
| ENSMUSG00000033965 | 374.955767  | 1.532504378 | 0.248990745 | 6.154864831 | 7.51E-10    | 2.00E-08    |
| ENSMUSG00000106384 | 57.10876683 | 1.535648911 | 0.361740947 | 4.245161976 | 2.18E-05    | 0.000239495 |
| ENSMUSG00000115746 | 14.07894452 | 1.536539305 | 0.701219632 | 2.191238287 | 0.028434553 | 0.098297779 |
| ENSMUSG00000037605 | 30.29930826 | 1.537385934 | 0.46577258  | 3.300722287 | 0.000964363 | 0.00644672  |
| ENSMUSG00000027676 | 55.80872291 | 1.539927779 | 0.36364606  | 4.234688472 | 2.29E-05    | 0.000248733 |
| ENSMUSG00000105457 | 95.83040762 | 1.540100249 | 0.328822634 | 4.68368077  | 2.82E-06    | 3.84E-05    |

|                    |             |             |             |             |             |             |
|--------------------|-------------|-------------|-------------|-------------|-------------|-------------|
| ENSMUSG00000029417 | 47.2027195  | 1.54191281  | 0.512068174 | 3.011147517 | 0.002602624 | 0.014660549 |
| ENSMUSG00000054951 | 1711.573886 | 1.54244699  | 0.136272744 | 11.31882241 | 1.06E-29    | 1.76E-27    |
| ENSMUSG00000101603 | 12.68773279 | 1.544340077 | 0.784339461 | 1.968968991 | 0.048956652 | 0.148907957 |
| ENSMUSG00000028037 | 88.10780314 | 1.544574203 | 0.403513154 | 3.827816236 | 0.000129285 | 0.00114731  |
| ENSMUSG00000056185 | 31.24576247 | 1.544624714 | 0.464722197 | 3.323759277 | 0.000888128 | 0.006032942 |
| ENSMUSG00000106514 | 20.63772513 | 1.545074486 | 0.562194453 | 2.748291943 | 0.005990664 | 0.028693686 |
| ENSMUSG00000018906 | 57.26547416 | 1.546811951 | 0.359926993 | 4.2975714   | 1.73E-05    | 0.000195403 |
| ENSMUSG00000113964 | 244.8992571 | 1.547050378 | 0.212302205 | 7.287019846 | 3.17E-13    | 1.28E-11    |
| ENSMUSG00000038370 | 29.61747745 | 1.547932202 | 0.459558663 | 3.368301652 | 0.000756328 | 0.005246867 |
| ENSMUSG00000004328 | 143.5395052 | 1.550223316 | 0.405868653 | 3.819519702 | 0.000133712 | 0.001177445 |
| ENSMUSG00000089512 | 21.13762653 | 1.552540207 | 0.583261597 | 2.66182484  | 0.007771831 | 0.035530874 |
| ENSMUSG00000086674 | 36.47939572 | 1.55416587  | 0.421973403 | 3.683089642 | 0.000230424 | 0.001894098 |
| ENSMUSG00000022822 | 3598.289776 | 1.554666558 | 0.137975767 | 11.26767832 | 1.90E-29    | 3.13E-27    |
| ENSMUSG00000103043 | 16.2565907  | 1.554723346 | 0.66355034  | 2.343037523 | 0.019127459 | 0.071969204 |
| ENSMUSG00000085786 | 14.46767937 | 1.55476855  | 0.692724486 | 2.24442557  | 0.024805033 | 0.088480012 |
| ENSMUSG00000074818 | 163.8757674 | 1.555428928 | 0.278017268 | 5.594720567 | 2.21E-08    | 4.64E-07    |
| ENSMUSG00000108359 | 26.85281322 | 1.555846485 | 0.472564928 | 3.292344383 | 0.000993559 | 0.006604278 |
| ENSMUSG00000079339 | 458.4289578 | 1.557434615 | 0.470514868 | 3.310064613 | 0.000932744 | 0.006280535 |
| ENSMUSG00000107970 | 27.39807164 | 1.557772959 | 0.50009548  | 3.114951085 | 0.001839754 | 0.010996611 |
| ENSMUSG00000031633 | 2583.582546 | 1.559450379 | 0.161012866 | 9.685253215 | 3.48E-22    | 3.38E-20    |
| ENSMUSG00000105909 | 191.7552878 | 1.560914451 | 0.226379565 | 6.895120826 | 5.38E-12    | 1.91E-10    |
| ENSMUSG00000078498 | 10.2264084  | 1.561073609 | 0.758904382 | 2.057009612 | 0.039685301 | 0.127359606 |
| ENSMUSG00000110127 | 35.4130075  | 1.56117953  | 0.497321158 | 3.139177781 | 0.001694226 | 0.01027548  |
| ENSMUSG00000075520 | 20175.73181 | 1.562874925 | 0.129701219 | 12.04980903 | 1.94E-33    | 4.25E-31    |
| ENSMUSG00000107542 | 16.63035802 | 1.563787252 | 0.60620605  | 2.579629902 | 0.009890625 | 0.042996397 |
| ENSMUSG00000047810 | 315.6878496 | 1.564850625 | 0.30305178  | 5.163641089 | 2.42E-07    | 4.18E-06    |
| ENSMUSG00000019823 | 3285.552156 | 1.565555364 | 0.140351873 | 11.15450285 | 6.81E-29    | 1.08E-26    |
| ENSMUSG00000105392 | 79.94811453 | 1.565925266 | 0.304361952 | 5.144944218 | 2.68E-07    | 4.59E-06    |
| ENSMUSG00000109039 | 17.88267608 | 1.56602126  | 0.611094183 | 2.562651232 | 0.010387634 | 0.044693266 |



|                    |             |             |             |             |             |             |
|--------------------|-------------|-------------|-------------|-------------|-------------|-------------|
| ENSMUSG00000058317 | 777.1912755 | 1.567130538 | 0.141768888 | 11.05412171 | 2.09E-28    | 3.09E-26    |
| ENSMUSG00000097122 | 14.5734308  | 1.569313136 | 0.666199707 | 2.355619672 | 0.01849184  | 0.070062269 |
| ENSMUSG00000105395 | 27.93221002 | 1.56961707  | 0.53197001  | 2.950574356 | 0.003171837 | 0.017181233 |
| ENSMUSG00000015222 | 169.158501  | 1.572700462 | 0.244563122 | 6.430652533 | 1.27E-10    | 3.80E-09    |
| ENSMUSG00000052131 | 514.4760048 | 1.574252769 | 0.489598396 | 3.215396092 | 0.001302646 | 0.008241225 |
| ENSMUSG00000110928 | 22.99716205 | 1.575199797 | 0.52619523  | 2.99356533  | 0.002757385 | 0.015357751 |
| ENSMUSG00000103822 | 11.63506057 | 1.575529691 | 0.726162903 | 2.169664251 | 0.03003229  | 0.102376965 |
| ENSMUSG00000047298 | 14.59159061 | 1.575559222 | 0.658634834 | 2.392158965 | 0.016749586 | 0.064793152 |
| ENSMUSG00000037685 | 9590.981585 | 1.575975692 | 0.10529308  | 14.96751447 | 1.20E-50    | 5.23E-48    |
| ENSMUSG00000071633 | 44.78433572 | 1.579380873 | 0.438132719 | 3.604800113 | 0.000312393 | 0.002473086 |
| ENSMUSG00000017390 | 1047.861347 | 1.579754033 | 0.172189234 | 9.174522673 | 4.54E-20    | 3.68E-18    |
| ENSMUSG00000100826 | 375.4363679 | 1.580953221 | 0.208471344 | 7.583551711 | 3.36E-14    | 1.53E-12    |
| ENSMUSG00000031497 | 1079.462815 | 1.58106967  | 0.131719426 | 12.00331434 | 3.41E-33    | 7.25E-31    |
| ENSMUSG00000024421 | 277.739339  | 1.582930327 | 0.322245241 | 4.912191475 | 9.01E-07    | 1.37E-05    |
| ENSMUSG00000040026 | 27.83428437 | 1.583699958 | 0.514234173 | 3.079725231 | 0.002071916 | 0.012121146 |
| ENSMUSG00000060923 | 17.94617855 | 1.583968049 | 0.638803783 | 2.479584641 | 0.013153551 | 0.053685457 |
| ENSMUSG00000064369 | 138.0441907 | 1.584304962 | 0.388266291 | 4.080459727 | 4.49E-05    | 0.000457256 |
| ENSMUSG00000088699 | 14.06768436 | 1.585877416 | 0.697139509 | 2.274835088 | 0.022915824 | 0.083015887 |
| ENSMUSG00000025528 | 432.7460823 | 1.586982822 | 0.286349582 | 5.542116767 | 2.99E-08    | 6.09E-07    |
| ENSMUSG00000081182 | 34.67430034 | 1.587251097 | 0.471483596 | 3.366503329 | 0.000761277 | 0.005273433 |
| ENSMUSG00000053310 | 313.3325055 | 1.588628841 | 0.237767774 | 6.681430429 | 2.37E-11    | 7.82E-10    |
| ENSMUSG00000062980 | 1042.411691 | 1.589162923 | 0.136961397 | 11.6029988  | 3.98E-31    | 7.46E-29    |
| ENSMUSG00000070315 | 335.512818  | 1.592225109 | 0.255809616 | 6.224258236 | 4.84E-10    | 1.32E-08    |
| ENSMUSG00000028970 | 54.897844   | 1.594329888 | 0.36322661  | 4.389353218 | 1.14E-05    | 0.00013351  |
| ENSMUSG00000031594 | 224.08813   | 1.594441213 | 0.208173895 | 7.659179422 | 1.87E-14    | 8.82E-13    |
| ENSMUSG00000109576 | 35.59978717 | 1.596181313 | 0.417805527 | 3.820393008 | 0.000133239 | 0.001173989 |
| ENSMUSG00000108108 | 19.78023362 | 1.596508735 | 0.552884552 | 2.887598737 | 0.003881947 | 0.02015623  |
| ENSMUSG00000113186 | 38.08059242 | 1.597220806 | 0.423775284 | 3.769027752 | 0.000163885 | 0.001405149 |
| ENSMUSG00000040990 | 380.1134263 | 1.598466796 | 0.21489933  | 7.438212102 | 1.02E-13    | 4.39E-12    |

|                    |             |             |             |             |             |             |
|--------------------|-------------|-------------|-------------|-------------|-------------|-------------|
| ENSMUSG00000032487 | 9.634797405 | 1.601184196 | 0.78506716  | 2.039550599 | 0.041395107 | 0.131446999 |
| ENSMUSG00000031750 | 82.20659071 | 1.602339622 | 0.336902192 | 4.756097346 | 1.97E-06    | 2.79E-05    |
| ENSMUSG00000106178 | 27.13997679 | 1.602832226 | 0.468239921 | 3.423100323 | 0.000619112 | 0.004439493 |
| ENSMUSG00000090399 | 56.07294943 | 1.604007679 | 0.389800026 | 4.114950155 | 3.87E-05    | 0.000397805 |
| ENSMUSG00000091952 | 12.40471374 | 1.604375536 | 0.792074881 | 2.02553518  | 0.04281244  | 0.134662937 |
| ENSMUSG00000045391 | 11.49336518 | 1.606118848 | 0.752845857 | 2.133396674 | 0.0328922   | 0.11027194  |
| ENSMUSG00000064342 | 52.82644072 | 1.607022326 | 0.419976372 | 3.826458897 | 0.00013     | 0.001152226 |
| ENSMUSG00000110754 | 34.5102591  | 1.607362719 | 0.456328859 | 3.522377968 | 0.000427694 | 0.003245941 |
| ENSMUSG00000034855 | 1069.346209 | 1.610642877 | 0.191887606 | 8.393678529 | 4.71E-17    | 2.90E-15    |
| ENSMUSG00000085445 | 131.7296339 | 1.6121375   | 0.289274049 | 5.573045713 | 2.50E-08    | 5.20E-07    |
| ENSMUSG00000110462 | 17.99917284 | 1.613604652 | 0.636481486 | 2.535194955 | 0.011238476 | 0.047530676 |
| ENSMUSG00000084744 | 25.83373888 | 1.617243384 | 0.514780646 | 3.141616523 | 0.001680179 | 0.010201383 |
| ENSMUSG00000030302 | 77.63857914 | 1.617264594 | 0.311519401 | 5.191537306 | 2.09E-07    | 3.65E-06    |
| ENSMUSG00000025491 | 16.51982338 | 1.622199232 | 0.710889464 | 2.281928927 | 0.022493537 | 0.081858414 |
| ENSMUSG00000102951 | 36.74659869 | 1.622247967 | 0.52420766  | 3.094666659 | 0.001970342 | 0.011649151 |
| ENSMUSG00000029630 | 1035.242242 | 1.622888348 | 0.602196278 | 2.694949149 | 0.007039937 | 0.032776126 |
| ENSMUSG00000013083 | 81.9643198  | 1.624458546 | 0.305867629 | 5.310985514 | 1.09E-07    | 2.03E-06    |
| ENSMUSG00000036412 | 12.27307988 | 1.62570522  | 0.736511614 | 2.207304256 | 0.02729281  | 0.095284497 |
| ENSMUSG00000034648 | 38.47506586 | 1.62759443  | 0.463963582 | 3.508021948 | 0.000451452 | 0.003398996 |
| ENSMUSG00000113917 | 15.21915993 | 1.628504847 | 0.62506633  | 2.605331257 | 0.009178547 | 0.04059714  |
| ENSMUSG00000103024 | 28.25854134 | 1.631239077 | 0.491972686 | 3.315710657 | 0.000914104 | 0.006183026 |
| ENSMUSG00000019359 | 324.095298  | 1.633716709 | 0.507435428 | 3.219555865 | 0.001283893 | 0.008145692 |
| ENSMUSG00000077549 | 92.43121812 | 1.634586444 | 0.308577652 | 5.297164045 | 1.18E-07    | 2.18E-06    |
| ENSMUSG00000026921 | 141.4592809 | 1.634974189 | 0.254110254 | 6.434113402 | 1.24E-10    | 3.72E-09    |
| ENSMUSG00000038843 | 61.96566168 | 1.638013445 | 0.385746365 | 4.246348365 | 2.17E-05    | 0.000238439 |
| ENSMUSG00000024340 | 2788.51095  | 1.638422807 | 0.16465031  | 9.950924533 | 2.50E-23    | 2.58E-21    |
| ENSMUSG00000032418 | 496.87398   | 1.639407562 | 0.139648896 | 11.7394953  | 8.00E-32    | 1.58E-29    |
| ENSMUSG00000038167 | 730.8934923 | 1.641064465 | 0.174730683 | 9.391965049 | 5.89E-21    | 5.15E-19    |
| ENSMUSG00000113788 | 29.80410576 | 1.641783036 | 0.534548915 | 3.07134294  | 0.002130982 | 0.012404865 |

|                     |             |             |             |             |             |             |
|---------------------|-------------|-------------|-------------|-------------|-------------|-------------|
| ENSMUSG00000021216  | 507.1211873 | 1.641885545 | 0.19636951  | 8.361204044 | 6.21E-17    | 3.77E-15    |
| ENSMUSG00000064918  | 90.57127576 | 1.6419745   | 0.285949613 | 5.742181226 | 9.35E-09    | 2.10E-07    |
| ENSMUSG00000006205  | 26.86019855 | 1.642507709 | 0.538060371 | 3.052645755 | 0.002268335 | 0.013061231 |
| ENSMUSG00000019699  | 28.83356143 | 1.642720157 | 0.529597261 | 3.101829026 | 0.00192329  | 0.011407258 |
| ENSMUSG000000106354 | 37.52293493 | 1.643156547 | 0.51908341  | 3.165496168 | 0.001548187 | 0.009529704 |
| ENSMUSG00000032735  | 21.89593832 | 1.644185852 | 0.54772801  | 3.00182905  | 0.002683628 | 0.015033307 |
| ENSMUSG000000104479 | 37.90469233 | 1.644438299 | 0.406329038 | 4.047060748 | 5.19E-05    | 0.000517974 |
| ENSMUSG00000041323  | 673.9875639 | 1.645752709 | 0.164123276 | 10.02753999 | 1.15E-23    | 1.22E-21    |
| ENSMUSG00000041012  | 179.0538328 | 1.646049879 | 0.220676997 | 7.459091354 | 8.71E-14    | 3.79E-12    |
| ENSMUSG00000027583  | 97.33961953 | 1.646663995 | 0.290939158 | 5.659822502 | 1.52E-08    | 3.28E-07    |
| ENSMUSG00000025197  | 16.20102278 | 1.648471197 | 0.754669791 | 2.184360916 | 0.028935738 | 0.099567334 |
| ENSMUSG00000028199  | 90.67785108 | 1.655227566 | 0.281014137 | 5.890193218 | 3.86E-09    | 9.27E-08    |
| ENSMUSG00000026737  | 32.71269919 | 1.657290079 | 0.568118326 | 2.917156522 | 0.003532385 | 0.018707126 |
| ENSMUSG000000108476 | 65.89242124 | 1.657477201 | 0.309519827 | 5.354995243 | 8.56E-08    | 1.63E-06    |
| ENSMUSG00000034528  | 998.3882589 | 1.657524296 | 0.19704058  | 8.412096093 | 4.03E-17    | 2.51E-15    |
| ENSMUSG00000094584  | 1279.06839  | 1.659076981 | 0.194443773 | 8.532425352 | 1.43E-17    | 9.40E-16    |
| ENSMUSG00000039116  | 1633.292677 | 1.659096297 | 0.14466634  | 11.46843348 | 1.90E-30    | 3.42E-28    |
| ENSMUSG00000075033  | 103.5372452 | 1.661575517 | 0.275221705 | 6.037225573 | 1.57E-09    | 3.98E-08    |
| ENSMUSG00000027961  | 32.439811   | 1.662202974 | 0.453383049 | 3.666222146 | 0.00024616  | 0.002002048 |
| ENSMUSG00000097404  | 71.25418944 | 1.663129708 | 0.331899803 | 5.010939124 | 5.42E-07    | 8.60E-06    |
| ENSMUSG00000033847  | 405.6396898 | 1.664834965 | 0.244500516 | 6.809126592 | 9.82E-12    | 3.37E-10    |
| ENSMUSG000000106386 | 55.40942776 | 1.665502179 | 0.375255108 | 4.438319814 | 9.07E-06    | 0.00010888  |
| ENSMUSG00000064215  | 1190.934614 | 1.666756155 | 0.145706395 | 11.4391421  | 2.67E-30    | 4.64E-28    |
| ENSMUSG00000086922  | 166.0923311 | 1.67130943  | 0.22196953  | 7.529454273 | 5.10E-14    | 2.29E-12    |
| ENSMUSG000000106214 | 35.64230699 | 1.6713416   | 0.421805286 | 3.962353376 | 7.42E-05    | 0.000708805 |
| ENSMUSG00000027358  | 1165.294983 | 1.672256198 | 0.184288675 | 9.074112633 | 1.15E-19    | 8.97E-18    |
| ENSMUSG000000115568 | 83.41271859 | 1.672399357 | 0.306693506 | 5.452998924 | 4.95E-08    | 9.83E-07    |
| ENSMUSG00000037994  | 13.54185047 | 1.672544745 | 0.685718158 | 2.439113978 | 0.014723324 | 0.058769436 |
| ENSMUSG00000032348  | 534.1392602 | 1.674016862 | 0.193755771 | 8.639829696 | 5.63E-18    | 3.85E-16    |

|                    |             |             |             |             |             |             |
|--------------------|-------------|-------------|-------------|-------------|-------------|-------------|
| ENSMUSG00000024899 | 3854.230746 | 1.67541916  | 0.186537796 | 8.981660524 | 2.67E-19    | 2.02E-17    |
| ENSMUSG00000031355 | 345.9722189 | 1.675529826 | 0.188049225 | 8.910059738 | 5.10E-19    | 3.74E-17    |
| ENSMUSG00000110262 | 18.98896734 | 1.677816989 | 0.578479076 | 2.900393565 | 0.003726944 | 0.019496734 |
| ENSMUSG00000104852 | 109.1625352 | 1.678475822 | 0.26782629  | 6.267031597 | 3.68E-10    | 1.02E-08    |
| ENSMUSG00000041481 | 21.46010038 | 1.680470801 | 0.716147821 | 2.346541807 | 0.01894854  | 0.071392363 |
| ENSMUSG00000044162 | 14.93371024 | 1.684456907 | 0.723302295 | 2.328842197 | 0.019867427 | 0.074090885 |
| ENSMUSG00000113502 | 64.80403123 | 1.685171793 | 0.424897494 | 3.966066683 | 7.31E-05    | 0.00070086  |
| ENSMUSG00000046688 | 11892.57608 | 1.687671182 | 0.185683197 | 9.088981713 | 1.00E-19    | 7.91E-18    |
| ENSMUSG00000104938 | 13.99067261 | 1.690581661 | 0.706076648 | 2.394331644 | 0.016650686 | 0.064477676 |
| ENSMUSG00000038641 | 13.67187992 | 1.697315589 | 0.788360429 | 2.152969032 | 0.031321112 | 0.105864221 |
| ENSMUSG00000084587 | 10.17420528 | 1.706673574 | 0.77339072  | 2.206741728 | 0.027332108 | 0.095367061 |
| ENSMUSG00000032033 | 2640.547383 | 1.708263239 | 0.183628311 | 9.302831524 | 1.37E-20    | 1.15E-18    |
| ENSMUSG00000029814 | 100.9923597 | 1.709463772 | 0.349997153 | 4.884221932 | 1.04E-06    | 1.56E-05    |
| ENSMUSG00000010796 | 19.94674662 | 1.709776092 | 0.546294778 | 3.129768327 | 0.001749442 | 0.010538711 |
| ENSMUSG00000046814 | 72.27779981 | 1.711097806 | 0.359083889 | 4.765175651 | 1.89E-06    | 2.68E-05    |
| ENSMUSG00000104064 | 9.42165664  | 1.711287187 | 0.820292905 | 2.086190404 | 0.036961379 | 0.120330982 |
| ENSMUSG00000020010 | 42.44373913 | 1.711470369 | 0.381980598 | 4.480516489 | 7.45E-06    | 9.16E-05    |
| ENSMUSG00000103187 | 53.14831317 | 1.712076242 | 0.39617383  | 4.321527854 | 1.55E-05    | 0.000177666 |
| ENSMUSG00000021226 | 1138.883008 | 1.712284425 | 0.12381367  | 13.82952648 | 1.69E-43    | 5.99E-41    |
| ENSMUSG00000087150 | 2715.091329 | 1.713578909 | 0.854991123 | 2.004206668 | 0.045047927 | 0.140035379 |
| ENSMUSG00000052942 | 259.8590936 | 1.716342986 | 0.274556279 | 6.251333951 | 4.07E-10    | 1.12E-08    |
| ENSMUSG00000038732 | 723.4059824 | 1.7177389   | 0.170834437 | 10.05499203 | 8.73E-24    | 9.50E-22    |
| ENSMUSG00000064653 | 14.51103544 | 1.717768191 | 0.683216819 | 2.514235809 | 0.011929064 | 0.049743841 |
| ENSMUSG00000047638 | 2668.363082 | 1.718404972 | 0.148417702 | 11.57816719 | 5.32E-31    | 9.88E-29    |
| ENSMUSG00000031444 | 15.7320671  | 1.720149782 | 0.877075838 | 1.961232664 | 0.049851888 | 0.150765793 |
| ENSMUSG00000042684 | 47.40657082 | 1.723146469 | 0.400811776 | 4.299141319 | 1.71E-05    | 0.000194198 |
| ENSMUSG00000108643 | 10.0562958  | 1.724341591 | 0.876721169 | 1.966807295 | 0.049205431 | 0.149420627 |
| ENSMUSG00000081816 | 14.27896923 | 1.725306979 | 0.712569305 | 2.421247966 | 0.015467322 | 0.061007563 |
| ENSMUSG00000102921 | 15.04471445 | 1.726225859 | 0.70330235  | 2.454457686 | 0.014109727 | 0.05682308  |

|                    |             |             |             |             |             |             |
|--------------------|-------------|-------------|-------------|-------------|-------------|-------------|
| ENSMUSG00000053862 | 195.2975997 | 1.726302906 | 0.287029304 | 6.014378606 | 1.81E-09    | 4.55E-08    |
| ENSMUSG00000084048 | 11.32776374 | 1.731490043 | 0.728750823 | 2.37596993  | 0.017502889 | 0.067113468 |
| ENSMUSG00000041649 | 16.9693969  | 1.731613983 | 0.636147367 | 2.722032777 | 0.006488171 | 0.030655232 |
| ENSMUSG00000070436 | 99.19645273 | 1.73307973  | 0.391404585 | 4.427847284 | 9.52E-06    | 0.000113811 |
| ENSMUSG00000104136 | 57.74873581 | 1.738260287 | 0.341547109 | 5.089371979 | 3.59E-07    | 5.97E-06    |
| ENSMUSG00000092415 | 26.88668318 | 1.738574881 | 0.596278936 | 2.915707359 | 0.003548832 | 0.018771941 |
| ENSMUSG00000067813 | 137.8849063 | 1.739687782 | 0.285205893 | 6.099760994 | 1.06E-09    | 2.76E-08    |
| ENSMUSG00000048655 | 22.09536832 | 1.739909619 | 0.558436489 | 3.115680392 | 0.001835211 | 0.010972395 |
| ENSMUSG00000099858 | 150.7060568 | 1.741203997 | 0.245467265 | 7.093426466 | 1.31E-12    | 5.02E-11    |
| ENSMUSG00000114247 | 63.27719209 | 1.74498569  | 0.32605579  | 5.351800961 | 8.71E-08    | 1.66E-06    |
| ENSMUSG00000103390 | 18.61785776 | 1.74518903  | 0.61072235  | 2.857581732 | 0.004268827 | 0.021789679 |
| ENSMUSG00000048528 | 177.8195591 | 1.750338331 | 0.370720611 | 4.72144866  | 2.34E-06    | 3.25E-05    |
| ENSMUSG00000097917 | 21.03696736 | 1.752446187 | 0.657062404 | 2.667092464 | 0.007651062 | 0.035065008 |
| ENSMUSG00000115366 | 18.826801   | 1.752592521 | 0.672017605 | 2.60795626  | 0.009108459 | 0.040311123 |
| ENSMUSG00000086746 | 9.558802725 | 1.755153745 | 0.886012891 | 1.980957345 | 0.047596057 | 0.145842219 |
| ENSMUSG00000032826 | 51.17770755 | 1.755786413 | 0.375762503 | 4.672596121 | 2.97E-06    | 4.03E-05    |
| ENSMUSG00000037797 | 165.6308291 | 1.757666812 | 0.313937697 | 5.598775896 | 2.16E-08    | 4.54E-07    |
| ENSMUSG00000114907 | 62.33935222 | 1.757911603 | 0.354569294 | 4.957878851 | 7.13E-07    | 1.11E-05    |
| ENSMUSG00000030382 | 49.56543182 | 1.758767675 | 0.385931716 | 4.557199113 | 5.18E-06    | 6.67E-05    |
| ENSMUSG00000111853 | 39.26685032 | 1.763739579 | 0.422947097 | 4.170118657 | 3.04E-05    | 0.000321617 |
| ENSMUSG00000038151 | 443.8298427 | 1.763942926 | 0.224780882 | 7.847388582 | 4.25E-15    | 2.15E-13    |
| ENSMUSG00000105936 | 47.20419933 | 1.76887953  | 0.38046373  | 4.649272426 | 3.33E-06    | 4.46E-05    |
| ENSMUSG00000014503 | 11.32183763 | 1.770900932 | 0.773345213 | 2.289922926 | 0.022025785 | 0.080458154 |
| ENSMUSG00000105681 | 120.7962981 | 1.770952784 | 0.236687378 | 7.482244304 | 7.31E-14    | 3.21E-12    |
| ENSMUSG00000114529 | 12.40976128 | 1.771039919 | 0.725828847 | 2.440024155 | 0.01468628  | 0.058642565 |
| ENSMUSG00000047497 | 80.39174062 | 1.771537632 | 0.394292217 | 4.492956127 | 7.02E-06    | 8.70E-05    |
| ENSMUSG00000039697 | 1958.9626   | 1.777170348 | 0.147616368 | 12.03911445 | 2.21E-33    | 4.79E-31    |
| ENSMUSG00000060508 | 194.7169451 | 1.781233614 | 0.354863463 | 5.019490034 | 5.18E-07    | 8.28E-06    |
| ENSMUSG00000106542 | 59.81202719 | 1.781880119 | 0.344300359 | 5.175365261 | 2.27E-07    | 3.96E-06    |

|                    |             |             |             |             |             |             |
|--------------------|-------------|-------------|-------------|-------------|-------------|-------------|
| ENSMUSG00000070530 | 53.87075243 | 1.785118241 | 0.471498148 | 3.786055682 | 0.000153057 | 0.001322593 |
| ENSMUSG00000104018 | 113.731713  | 1.786956908 | 0.25633141  | 6.971275615 | 3.14E-12    | 1.16E-10    |
| ENSMUSG00000020169 | 18.95602262 | 1.788478718 | 0.606965619 | 2.946589827 | 0.003212991 | 0.017356735 |
| ENSMUSG00000032714 | 200.3066299 | 1.792397364 | 0.221935229 | 8.076218339 | 6.68E-16    | 3.62E-14    |
| ENSMUSG00000029380 | 158.3645128 | 1.796797142 | 0.352334793 | 5.099686938 | 3.40E-07    | 5.68E-06    |
| ENSMUSG00000028028 | 10102.06882 | 1.797770983 | 0.18822444  | 9.551209109 | 1.28E-21    | 1.21E-19    |
| ENSMUSG00000022235 | 1499.317209 | 1.799712016 | 0.755291062 | 2.382805922 | 0.01718125  | 0.066130316 |
| ENSMUSG00000112911 | 15.37919189 | 1.801403699 | 0.774110775 | 2.32706191  | 0.01996197  | 0.074331592 |
| ENSMUSG00000037124 | 29.70887144 | 1.802051382 | 0.521694444 | 3.45422767  | 0.000551871 | 0.004022237 |
| ENSMUSG00000015968 | 220.9412218 | 1.807786997 | 0.290184372 | 6.229787586 | 4.67E-10    | 1.28E-08    |
| ENSMUSG00000100551 | 7.404172901 | 1.808524056 | 0.898071192 | 2.01378696  | 0.044031905 | 0.137528784 |
| ENSMUSG00000089988 | 131.5033065 | 1.809271855 | 0.305092763 | 5.930235251 | 3.03E-09    | 7.38E-08    |
| ENSMUSG00000070369 | 63.41478912 | 1.818506044 | 0.434597931 | 4.184341242 | 2.86E-05    | 0.000303712 |
| ENSMUSG00000079019 | 15.0684242  | 1.820513691 | 0.648070032 | 2.809131113 | 0.004967541 | 0.024722413 |
| ENSMUSG00000103553 | 78.75606612 | 1.821800403 | 0.358483804 | 5.081960143 | 3.74E-07    | 6.18E-06    |
| ENSMUSG00000030621 | 249.1646012 | 1.823091725 | 0.233456245 | 7.80913669  | 5.76E-15    | 2.87E-13    |
| ENSMUSG00000105962 | 29.49006061 | 1.824636569 | 0.493992719 | 3.693650732 | 0.000221057 | 0.001830598 |
| ENSMUSG00000113766 | 60.28388156 | 1.82683705  | 0.343615769 | 5.316511099 | 1.06E-07    | 1.97E-06    |
| ENSMUSG00000018924 | 209.2737762 | 1.826948568 | 0.753760543 | 2.423778458 | 0.015359973 | 0.060680735 |
| ENSMUSG00000030711 | 203.9447701 | 1.827128522 | 0.33365639  | 5.476078314 | 4.35E-08    | 8.67E-07    |
| ENSMUSG00000042284 | 7627.134601 | 1.831831784 | 0.119456287 | 15.33474565 | 4.48E-53    | 2.17E-50    |
| ENSMUSG00000037762 | 82.92050019 | 1.832945633 | 0.387043736 | 4.735758421 | 2.18E-06    | 3.05E-05    |
| ENSMUSG00000087801 | 10.0353567  | 1.835278513 | 0.929098373 | 1.975332823 | 0.048230391 | 0.14726562  |
| ENSMUSG00000021835 | 30.36633103 | 1.84071807  | 0.479978137 | 3.835003991 | 0.000125562 | 0.001117384 |
| ENSMUSG00000027762 | 18.77722694 | 1.841407368 | 0.826344456 | 2.22837747  | 0.025855354 | 0.091393288 |
| ENSMUSG00000070138 | 11.29288546 | 1.841797234 | 0.742849652 | 2.479367432 | 0.013161565 | 0.053695845 |
| ENSMUSG00000024500 | 460.0491517 | 1.843823494 | 0.197044791 | 9.357382576 | 8.17E-21    | 7.01E-19    |
| ENSMUSG00000071862 | 23.59820462 | 1.844417276 | 0.619665219 | 2.97647378  | 0.00291584  | 0.01605584  |
| ENSMUSG00000053825 | 18.80941728 | 1.848041101 | 0.648549005 | 2.849501098 | 0.004378785 | 0.022249099 |

|                    |             |             |             |             |             |             |
|--------------------|-------------|-------------|-------------|-------------|-------------|-------------|
| ENSMUSG00000082917 | 10.84817168 | 1.849504933 | 0.937419653 | 1.972974353 | 0.048498484 | 0.147916398 |
| ENSMUSG00000037784 | 23.64907558 | 1.850574637 | 0.68571781  | 2.69874081  | 0.006960236 | 0.032459269 |
| ENSMUSG00000024863 | 50.67890703 | 1.851269424 | 0.364474144 | 5.079288761 | 3.79E-07    | 6.25E-06    |
| ENSMUSG00000089214 | 14.60232578 | 1.854206958 | 0.715000568 | 2.593294385 | 0.009506136 | 0.04169873  |
| ENSMUSG00000106516 | 12.19408411 | 1.857707778 | 0.738614885 | 2.515123669 | 0.011899064 | 0.049628019 |
| ENSMUSG00000027820 | 5270.702107 | 1.858924149 | 0.215522565 | 8.625194986 | 6.40E-18    | 4.35E-16    |
| ENSMUSG00000077493 | 27.67382402 | 1.863374884 | 0.474706066 | 3.925323515 | 8.66E-05    | 0.000810219 |
| ENSMUSG00000036368 | 318.2844752 | 1.867167189 | 0.169952578 | 10.98640112 | 4.44E-28    | 6.48E-26    |
| ENSMUSG00000090264 | 47.33062497 | 1.867367745 | 0.446833849 | 4.17910986  | 2.93E-05    | 0.000310192 |
| ENSMUSG00000105720 | 26.03112694 | 1.869568578 | 0.504888248 | 3.702935424 | 0.000213119 | 0.001772099 |
| ENSMUSG00000102750 | 8.417475622 | 1.869709573 | 0.921119031 | 2.029824062 | 0.042374426 | 0.133576313 |
| ENSMUSG00000027309 | 4330.669303 | 1.875160745 | 0.109189679 | 17.17342476 | 4.20E-66    | 3.12E-63    |
| ENSMUSG00000114430 | 18.46162066 | 1.878756724 | 0.641085195 | 2.930588226 | 0.003383209 | 0.018097612 |
| ENSMUSG00000097146 | 14.12102499 | 1.879269026 | 0.778863477 | 2.412834958 | 0.015828985 | 0.062082695 |
| ENSMUSG00000115543 | 65.39775435 | 1.879713055 | 0.346602707 | 5.423249775 | 5.85E-08    | 1.15E-06    |
| ENSMUSG00000056888 | 407.7534768 | 1.879956754 | 0.24611375  | 7.63856857  | 2.20E-14    | 1.02E-12    |
| ENSMUSG00000032087 | 24.18878586 | 1.88133754  | 0.576813479 | 3.261604673 | 0.001107835 | 0.007245112 |
| ENSMUSG00000023176 | 27.00902362 | 1.881935589 | 0.653349289 | 2.880443312 | 0.003971164 | 0.020529007 |
| ENSMUSG00000035239 | 429.4316566 | 1.883818685 | 0.17612686  | 10.69580578 | 1.06E-26    | 1.41E-24    |
| ENSMUSG00000089659 | 23.01793832 | 1.88402745  | 0.545722373 | 3.452355163 | 0.000555716 | 0.004044718 |
| ENSMUSG00000071604 | 1889.975868 | 1.885521574 | 0.173398137 | 10.87394369 | 1.53E-27    | 2.10E-25    |
| ENSMUSG00000078566 | 171.1362627 | 1.886724064 | 0.218182796 | 8.647446526 | 5.27E-18    | 3.61E-16    |
| ENSMUSG00000019817 | 122.0048424 | 1.887844006 | 0.331268453 | 5.698834255 | 1.21E-08    | 2.65E-07    |
| ENSMUSG00000077602 | 9.032885346 | 1.888150007 | 0.817654703 | 2.309226622 | 0.020931009 | 0.077294657 |
| ENSMUSG00000105502 | 8.549111003 | 1.888657217 | 0.913306461 | 2.067933708 | 0.038646257 | 0.124779236 |
| ENSMUSG00000069255 | 19.96002537 | 1.890051238 | 0.552346429 | 3.421858347 | 0.000621947 | 0.004456954 |
| ENSMUSG00000106164 | 11.46551484 | 1.891272779 | 0.754396517 | 2.507000941 | 0.012176039 | 0.050499877 |
| ENSMUSG00000042498 | 43.43595348 | 1.897971958 | 0.445084244 | 4.264298243 | 2.01E-05    | 0.000222002 |
| ENSMUSG00000020102 | 330.1089877 | 1.899566269 | 0.514663181 | 3.690892102 | 0.000223469 | 0.001845771 |

|                    |             |             |             |             |             |             |
|--------------------|-------------|-------------|-------------|-------------|-------------|-------------|
| ENSMUSG00000073680 | 52.19657714 | 1.90178733  | 0.367593234 | 5.17361897  | 2.30E-07    | 3.98E-06    |
| ENSMUSG00000103505 | 44.92635469 | 1.906238004 | 0.414675989 | 4.596933647 | 4.29E-06    | 5.62E-05    |
| ENSMUSG00000057137 | 58.97344777 | 1.906365784 | 0.41676944  | 4.574149643 | 4.78E-06    | 6.20E-05    |
| ENSMUSG00000113517 | 19.3104458  | 1.906929705 | 0.652519825 | 2.922408841 | 0.003473353 | 0.018455859 |
| ENSMUSG00000108500 | 65.51144467 | 1.912017792 | 0.323416425 | 5.911937805 | 3.38E-09    | 8.20E-08    |
| ENSMUSG00000097009 | 12.00902944 | 1.916965333 | 0.745045649 | 2.572950175 | 0.010083572 | 0.043630917 |
| ENSMUSG00000030972 | 205.6271679 | 1.917381617 | 0.202055326 | 9.489389155 | 2.32E-21    | 2.12E-19    |
| ENSMUSG00000035780 | 1225.878955 | 1.918018611 | 0.205969439 | 9.312151457 | 1.25E-20    | 1.05E-18    |
| ENSMUSG00000048216 | 51.37628806 | 1.919953019 | 0.384016972 | 4.999656676 | 5.74E-07    | 9.06E-06    |
| ENSMUSG00000104157 | 13.56792886 | 1.921495384 | 0.723404319 | 2.656184562 | 0.007903035 | 0.035976657 |
| ENSMUSG00000032081 | 517.9724606 | 1.921946454 | 0.271871239 | 7.069326141 | 1.56E-12    | 5.90E-11    |
| ENSMUSG00000087398 | 10.14874716 | 1.926649968 | 0.863086369 | 2.232279454 | 0.025596499 | 0.09065071  |
| ENSMUSG00000030630 | 358.3663758 | 1.927615972 | 0.173528238 | 11.10837054 | 1.14E-28    | 1.79E-26    |
| ENSMUSG00000040963 | 17.54048912 | 1.928403378 | 0.680664343 | 2.833119433 | 0.004609616 | 0.023194731 |
| ENSMUSG00000097082 | 9.430745756 | 1.936026413 | 0.828388809 | 2.337098706 | 0.019434052 | 0.072796391 |
| ENSMUSG00000096299 | 309.6862411 | 1.938001475 | 0.260112019 | 7.450641774 | 9.29E-14    | 4.04E-12    |
| ENSMUSG00000051041 | 18.6823187  | 1.943234797 | 0.607200233 | 3.200319583 | 0.001372753 | 0.008619229 |
| ENSMUSG00000088113 | 30.68861251 | 1.946241274 | 0.462656771 | 4.20666333  | 2.59E-05    | 0.000277738 |
| ENSMUSG00000040093 | 921.528445  | 1.94763676  | 0.228296523 | 8.531171371 | 1.45E-17    | 9.47E-16    |
| ENSMUSG00000019906 | 8.564501145 | 1.949214309 | 0.853214253 | 2.284554322 | 0.022338974 | 0.081442122 |
| ENSMUSG00000111620 | 52.67021262 | 1.950182653 | 0.373766565 | 5.217648755 | 1.81E-07    | 3.22E-06    |
| ENSMUSG00000080918 | 8.727673613 | 1.950736997 | 0.841234209 | 2.318898798 | 0.020400524 | 0.075623686 |
| ENSMUSG00000037390 | 5863.620288 | 1.951266155 | 0.450803521 | 4.328418182 | 1.50E-05    | 0.000172642 |
| ENSMUSG00000073418 | 348.2734345 | 1.955153791 | 0.823817473 | 2.373285168 | 0.017630646 | 0.067475723 |
| ENSMUSG00000031230 | 386.6539225 | 1.955176328 | 0.270929929 | 7.21653875  | 5.33E-13    | 2.14E-11    |
| ENSMUSG00000027574 | 13.0117246  | 1.955477291 | 0.710412483 | 2.752594213 | 0.005912513 | 0.028380318 |
| ENSMUSG00000033544 | 29.93377256 | 1.959091091 | 0.530100265 | 3.695699137 | 0.000219283 | 0.001818602 |
| ENSMUSG00000079017 | 29.65391304 | 1.96128361  | 0.561437433 | 3.49332534  | 0.000477045 | 0.003560435 |
| ENSMUSG00000049176 | 11.30318204 | 1.962663445 | 0.754839158 | 2.600108147 | 0.009319439 | 0.041041232 |



|                    |             |             |             |             |             |             |
|--------------------|-------------|-------------|-------------|-------------|-------------|-------------|
| ENSMUSG00000037405 | 1040.256141 | 1.965537863 | 0.228276509 | 8.610337835 | 7.28E-18    | 4.92E-16    |
| ENSMUSG00000050052 | 39.75193751 | 1.971455844 | 0.413449628 | 4.768309631 | 1.86E-06    | 2.64E-05    |
| ENSMUSG00000031595 | 85.5321997  | 1.973172405 | 0.43396648  | 4.54683137  | 5.45E-06    | 6.93E-05    |
| ENSMUSG00000055322 | 51.68344731 | 1.976222936 | 0.414277252 | 4.770290736 | 1.84E-06    | 2.62E-05    |
| ENSMUSG00000037145 | 28365.87133 | 1.97645664  | 0.152560131 | 12.95526309 | 2.19E-38    | 6.19E-36    |
| ENSMUSG00000105624 | 42.19460554 | 1.984340007 | 0.394614654 | 5.028551243 | 4.94E-07    | 7.96E-06    |
| ENSMUSG00000099419 | 16.6500137  | 1.986376214 | 0.666339213 | 2.981028545 | 0.00287282  | 0.015865964 |
| ENSMUSG00000111888 | 56.33738628 | 1.987242452 | 0.373392028 | 5.322134116 | 1.03E-07    | 1.92E-06    |
| ENSMUSG00000102863 | 44.627625   | 1.989863615 | 0.39055061  | 5.095021147 | 3.49E-07    | 5.81E-06    |
| ENSMUSG00000018500 | 154.8544747 | 1.991517884 | 0.280956677 | 7.088345106 | 1.36E-12    | 5.18E-11    |
| ENSMUSG00000022218 | 262.920568  | 1.994084513 | 0.253439098 | 7.868101357 | 3.60E-15    | 1.84E-13    |
| ENSMUSG00000086587 | 6.488046654 | 1.994605141 | 1.011451048 | 1.972023406 | 0.048606935 | 0.148085143 |
| ENSMUSG00000020798 | 63.49329171 | 1.994734623 | 0.384917356 | 5.182241309 | 2.19E-07    | 3.82E-06    |
| ENSMUSG00000024502 | 8.503549554 | 1.995725265 | 0.952249325 | 2.095801186 | 0.036099831 | 0.118408933 |
| ENSMUSG00000111617 | 34.71284268 | 1.997317899 | 0.527238073 | 3.788265682 | 0.000151703 | 0.001312813 |
| ENSMUSG00000045064 | 90.54163506 | 2.002535614 | 0.348773717 | 5.741647132 | 9.38E-09    | 2.10E-07    |
| ENSMUSG00000021986 | 102.8145635 | 2.003383307 | 0.400217981 | 5.005730376 | 5.57E-07    | 8.81E-06    |
| ENSMUSG00000029167 | 1799.737044 | 2.004040379 | 0.154963282 | 12.93235634 | 2.96E-38    | 8.22E-36    |
| ENSMUSG00000027790 | 13168.07717 | 2.004304135 | 0.203940563 | 9.827883718 | 8.54E-23    | 8.66E-21    |
| ENSMUSG00000036231 | 1854.408413 | 2.005071767 | 0.548074709 | 3.658391338 | 0.000253803 | 0.002055648 |
| ENSMUSG00000084923 | 7.374959023 | 2.005776342 | 0.88969461  | 2.254454865 | 0.024167567 | 0.086663598 |
| ENSMUSG00000031257 | 2563.283246 | 2.005839027 | 0.183246623 | 10.94611726 | 6.94E-28    | 9.79E-26    |
| ENSMUSG00000101537 | 25.33203921 | 2.008363222 | 0.578559137 | 3.471318823 | 0.000517909 | 0.003821313 |
| ENSMUSG00000025194 | 8384.067294 | 2.009654831 | 0.48138292  | 4.174753086 | 2.98E-05    | 0.000315738 |
| ENSMUSG00000115383 | 41.10328972 | 2.010216336 | 0.395098717 | 5.087883738 | 3.62E-07    | 6.01E-06    |
| ENSMUSG00000041762 | 973.2419413 | 2.010523534 | 0.133029307 | 15.11338806 | 1.32E-51    | 6.02E-49    |
| ENSMUSG00000065904 | 27.89414711 | 2.011584535 | 0.47295318  | 4.253242431 | 2.11E-05    | 0.000231809 |
| ENSMUSG00000112634 | 10.74257329 | 2.013134209 | 0.791843268 | 2.542339237 | 0.011011324 | 0.046782919 |
| ENSMUSG00000024727 | 1409.775073 | 2.014435848 | 0.224599558 | 8.969010731 | 2.99E-19    | 2.25E-17    |

|                    |             |             |             |             |             |             |
|--------------------|-------------|-------------|-------------|-------------|-------------|-------------|
| ENSMUSG00000113656 | 11.02741892 | 2.015253961 | 0.85040821  | 2.369748949 | 0.017800167 | 0.067972865 |
| ENSMUSG00000042942 | 197.5221866 | 2.015670147 | 0.317675275 | 6.345064619 | 2.22E-10    | 6.40E-09    |
| ENSMUSG00000098192 | 59.45485492 | 2.01741949  | 0.417305509 | 4.834394581 | 1.34E-06    | 1.95E-05    |
| ENSMUSG00000110438 | 6.58045901  | 2.021858521 | 0.966896395 | 2.091080834 | 0.036520818 | 0.119455965 |
| ENSMUSG00000105701 | 159.8997351 | 2.023237471 | 0.340587513 | 5.940433502 | 2.84E-09    | 6.96E-08    |
| ENSMUSG00000001802 | 133.9855127 | 2.026273877 | 0.287418072 | 7.049918145 | 1.79E-12    | 6.75E-11    |
| ENSMUSG00000041700 | 19.05030784 | 2.026549073 | 0.674314543 | 3.005346828 | 0.002652782 | 0.014890432 |
| ENSMUSG00000046005 | 13.62261207 | 2.028140064 | 0.733205573 | 2.766127455 | 0.005672636 | 0.027483262 |
| ENSMUSG00000104994 | 24.13540811 | 2.029453921 | 0.583194649 | 3.479891189 | 0.000501617 | 0.003722653 |
| ENSMUSG00000036553 | 266.4522152 | 2.030660592 | 0.297537364 | 6.824892731 | 8.80E-12    | 3.04E-10    |
| ENSMUSG00000113416 | 40.86318182 | 2.032819166 | 0.456710434 | 4.451002244 | 8.55E-06    | 0.000103366 |
| ENSMUSG00000102391 | 14.2151862  | 2.033259987 | 0.841899761 | 2.415085596 | 0.015731512 | 0.061798213 |
| ENSMUSG00000103356 | 89.29598289 | 2.033928869 | 0.318279142 | 6.390393207 | 1.65E-10    | 4.86E-09    |
| ENSMUSG00000103851 | 11.18197509 | 2.035713426 | 0.920337673 | 2.21192013  | 0.026972184 | 0.094610513 |
| ENSMUSG00000072620 | 468.4633012 | 2.037199847 | 0.2487896   | 8.188444571 | 2.65E-16    | 1.46E-14    |
| ENSMUSG00000035919 | 2315.397073 | 2.044334997 | 0.138001681 | 14.81384131 | 1.19E-49    | 4.92E-47    |
| ENSMUSG00000104888 | 202.6853609 | 2.044568005 | 0.290390851 | 7.04074526  | 1.91E-12    | 7.18E-11    |
| ENSMUSG00000023070 | 1186.306842 | 2.045210001 | 0.184581053 | 11.08028135 | 1.56E-28    | 2.39E-26    |
| ENSMUSG00000096968 | 52.23752037 | 2.055457912 | 0.369254281 | 5.56651071  | 2.60E-08    | 5.35E-07    |
| ENSMUSG00000113234 | 21.98364019 | 2.058968479 | 0.570946505 | 3.60623712  | 0.000310669 | 0.002460311 |
| ENSMUSG00000030968 | 10.13378692 | 2.061057215 | 0.864842011 | 2.38316038  | 0.017164714 | 0.066100897 |
| ENSMUSG00000077274 | 17.78123872 | 2.062083313 | 0.589483669 | 3.498117798 | 0.000468554 | 0.003508806 |
| ENSMUSG00000101581 | 43.62799718 | 2.063136623 | 0.483670022 | 4.265587138 | 1.99E-05    | 0.00022099  |
| ENSMUSG00000093898 | 8.99390581  | 2.067736267 | 1.051319214 | 1.966801557 | 0.049206093 | 0.149420627 |
| ENSMUSG00000035041 | 2817.182139 | 2.070708255 | 0.221579357 | 9.34522188  | 9.17E-21    | 7.81E-19    |
| ENSMUSG00000033453 | 3305.31663  | 2.072317374 | 0.123667063 | 16.75722961 | 5.01E-63    | 3.29E-60    |
| ENSMUSG00000107041 | 69.65156822 | 2.073063973 | 0.325860847 | 6.361807482 | 1.99E-10    | 5.80E-09    |
| ENSMUSG00000115314 | 14.08047139 | 2.074459615 | 0.705454643 | 2.940599563 | 0.003275777 | 0.017624392 |
| ENSMUSG00000032875 | 1259.082881 | 2.075381376 | 0.172788746 | 12.01109112 | 3.11E-33    | 6.66E-31    |

|                    |             |             |             |             |             |             |
|--------------------|-------------|-------------|-------------|-------------|-------------|-------------|
| ENSMUSG00000052584 | 21.30118319 | 2.078790387 | 0.602008016 | 3.4530942   | 0.000554195 | 0.00403497  |
| ENSMUSG00000106320 | 125.2528311 | 2.080890361 | 0.271148257 | 7.674363767 | 1.66E-14    | 7.90E-13    |
| ENSMUSG00000028602 | 26.43143977 | 2.081515996 | 0.530544451 | 3.92335834  | 8.73E-05    | 0.000815833 |
| ENSMUSG00000095457 | 4810.475441 | 2.083715602 | 0.150928584 | 13.80597064 | 2.35E-43    | 8.17E-41    |
| ENSMUSG00000106583 | 12.55619013 | 2.087342105 | 0.760691212 | 2.744007124 | 0.006069422 | 0.028983765 |
| ENSMUSG00000089940 | 23.04535683 | 2.088105215 | 0.554558941 | 3.765344059 | 0.00016632  | 0.001423839 |
| ENSMUSG00000031216 | 154.4566631 | 2.089754879 | 0.23221647  | 8.99916738  | 2.27E-19    | 1.74E-17    |
| ENSMUSG00000032698 | 72.08184978 | 2.091606763 | 0.376739721 | 5.551861523 | 2.83E-08    | 5.78E-07    |
| ENSMUSG00000037583 | 216.3356015 | 2.093869621 | 0.251362294 | 8.330086392 | 8.08E-17    | 4.82E-15    |
| ENSMUSG00000064350 | 54.95034024 | 2.095348663 | 0.468522803 | 4.472244782 | 7.74E-06    | 9.49E-05    |
| ENSMUSG00000038600 | 28.91712498 | 2.096906637 | 0.604146485 | 3.470857963 | 0.000518798 | 0.003823437 |
| ENSMUSG00000106049 | 52.5929598  | 2.097691133 | 0.440451784 | 4.762589704 | 1.91E-06    | 2.71E-05    |
| ENSMUSG00000115505 | 6.661212341 | 2.098469104 | 1.048051662 | 2.002257312 | 0.045257065 | 0.140587519 |
| ENSMUSG00000084674 | 6.668582371 | 2.100123601 | 1.033244353 | 2.032552701 | 0.042097734 | 0.132992076 |
| ENSMUSG00000028226 | 110.9105634 | 2.100178269 | 0.331694232 | 6.331669558 | 2.43E-10    | 6.92E-09    |
| ENSMUSG00000085888 | 16.43474486 | 2.106751239 | 0.698601779 | 3.015668302 | 0.002564136 | 0.014472993 |
| ENSMUSG00000023073 | 111.9426547 | 2.108709041 | 0.295619239 | 7.13319284  | 9.81E-13    | 3.84E-11    |
| ENSMUSG00000089706 | 105.3734433 | 2.109776044 | 0.280414563 | 7.523774879 | 5.32E-14    | 2.38E-12    |
| ENSMUSG00000104140 | 18.31939469 | 2.110231605 | 0.610551682 | 3.456270232 | 0.000547706 | 0.003998164 |
| ENSMUSG00000004562 | 2363.793634 | 2.111500362 | 0.39047181  | 5.407561585 | 6.39E-08    | 1.25E-06    |
| ENSMUSG00000113241 | 16.29248514 | 2.126566408 | 0.706374817 | 3.010535423 | 0.002607875 | 0.014686421 |
| ENSMUSG00000106651 | 34.74893195 | 2.130232086 | 0.45694892  | 4.66186042  | 3.13E-06    | 4.22E-05    |
| ENSMUSG00000048040 | 32.3752118  | 2.130360362 | 0.554640596 | 3.840974458 | 0.000122547 | 0.00109273  |
| ENSMUSG00000105230 | 9.50526746  | 2.139552698 | 0.812624031 | 2.632893709 | 0.008466084 | 0.038041937 |
| ENSMUSG00000030519 | 56.29601421 | 2.149588919 | 0.390186303 | 5.509134744 | 3.61E-08    | 7.26E-07    |
| ENSMUSG00000001131 | 51.28324353 | 2.150929163 | 0.47746453  | 4.50489833  | 6.64E-06    | 8.29E-05    |
| ENSMUSG00000111442 | 5.333727454 | 2.153350103 | 1.063844037 | 2.024121985 | 0.042957602 | 0.134967242 |
| ENSMUSG00000087346 | 36.26535552 | 2.155431831 | 0.427557778 | 5.041264466 | 4.62E-07    | 7.51E-06    |
| ENSMUSG00000049409 | 25.24399024 | 2.157323319 | 0.617520244 | 3.49352647  | 0.000476686 | 0.003558945 |

|                    |             |             |             |             |             |             |
|--------------------|-------------|-------------|-------------|-------------|-------------|-------------|
| ENSMUSG00000036892 | 75.58058183 | 2.16113602  | 0.389726437 | 5.545264104 | 2.94E-08    | 5.98E-07    |
| ENSMUSG00000028088 | 3241.18635  | 2.162401007 | 0.364588451 | 5.931073801 | 3.01E-09    | 7.35E-08    |
| ENSMUSG00000060613 | 74.40090086 | 2.163256727 | 0.372390322 | 5.80911103  | 6.28E-09    | 1.45E-07    |
| ENSMUSG00000058794 | 39.83091325 | 2.165911145 | 0.428516135 | 5.054444784 | 4.32E-07    | 7.05E-06    |
| ENSMUSG00000095871 | 13.43212239 | 2.172944206 | 0.720203288 | 3.017126194 | 0.002551836 | 0.014418162 |
| ENSMUSG00000014599 | 1258.881288 | 2.174203375 | 0.189675136 | 11.46277483 | 2.03E-30    | 3.56E-28    |
| ENSMUSG00000027068 | 23.93256858 | 2.175092406 | 0.546146898 | 3.982614228 | 6.82E-05    | 0.000659751 |
| ENSMUSG00000108145 | 7.339806269 | 2.176701306 | 1.076529029 | 2.02196248  | 0.043180228 | 0.135571205 |
| ENSMUSG00000094103 | 6.664478765 | 2.179191548 | 1.0655171   | 2.045196223 | 0.040835517 | 0.130040391 |
| ENSMUSG00000102687 | 25.01616894 | 2.17967096  | 0.537787345 | 4.053035053 | 5.06E-05    | 0.000506278 |
| ENSMUSG00000043740 | 26.77350688 | 2.182658108 | 0.536131752 | 4.071122631 | 4.68E-05    | 0.000474488 |
| ENSMUSG00000096377 | 6.089808227 | 2.185218949 | 1.063576913 | 2.054594192 | 0.039918217 | 0.127886246 |
| ENSMUSG00000076609 | 28.59164748 | 2.18688768  | 0.695543028 | 3.144144347 | 0.001665733 | 0.010132979 |
| ENSMUSG00000074479 | 359.8012122 | 2.190833065 | 0.865876075 | 2.530192402 | 0.011399999 | 0.04807704  |
| ENSMUSG00000027577 | 6.634226174 | 2.197588355 | 1.095549175 | 2.005923974 | 0.04486436  | 0.139523092 |
| ENSMUSG00000106859 | 79.99031971 | 2.199210516 | 0.316412971 | 6.950443614 | 3.64E-12    | 1.33E-10    |
| ENSMUSG00000070798 | 118.8308496 | 2.202095015 | 0.294408245 | 7.479732832 | 7.45E-14    | 3.27E-12    |
| ENSMUSG00000105976 | 14.40283787 | 2.204472165 | 0.675416673 | 3.263869923 | 0.001099016 | 0.007197991 |
| ENSMUSG00000096630 | 37.69952258 | 2.209962933 | 0.559465517 | 3.950132521 | 7.81E-05    | 0.000740344 |
| ENSMUSG00000017724 | 961.9274897 | 2.210625839 | 0.21553765  | 10.25633268 | 1.11E-24    | 1.29E-22    |
| ENSMUSG00000072683 | 46.54046727 | 2.216534592 | 0.380048723 | 5.832237971 | 5.47E-09    | 1.28E-07    |
| ENSMUSG00000078350 | 81.89837209 | 2.21700311  | 0.391031064 | 5.669634236 | 1.43E-08    | 3.11E-07    |
| ENSMUSG00000000706 | 30.26558718 | 2.223091145 | 0.474636964 | 4.683771624 | 2.82E-06    | 3.84E-05    |
| ENSMUSG00000115345 | 9.483759349 | 2.227697717 | 0.828911725 | 2.687496931 | 0.007198976 | 0.033363336 |
| ENSMUSG00000095562 | 144.7444453 | 2.234289027 | 0.700233138 | 3.190778763 | 0.001418899 | 0.008863547 |
| ENSMUSG00000074071 | 44.89182866 | 2.245747537 | 0.488034094 | 4.601620181 | 4.19E-06    | 5.52E-05    |
| ENSMUSG00000036123 | 2692.114632 | 2.249304952 | 0.444830465 | 5.056544304 | 4.27E-07    | 6.97E-06    |
| ENSMUSG00000031788 | 2737.586266 | 2.250049707 | 0.17337106  | 12.97823127 | 1.63E-38    | 4.65E-36    |
| ENSMUSG00000070799 | 12.16499056 | 2.253345519 | 0.760585637 | 2.962645374 | 0.003050077 | 0.016683781 |

|                    |             |             |             |             |             |             |
|--------------------|-------------|-------------|-------------|-------------|-------------|-------------|
| ENSMUSG00000079388 | 20.34991834 | 2.254522134 | 0.616343589 | 3.657898249 | 0.000254292 | 0.00205768  |
| ENSMUSG00000046213 | 18.68080651 | 2.258097345 | 0.650871818 | 3.46934263  | 0.000521734 | 0.003841262 |
| ENSMUSG00000087400 | 19.42233942 | 2.258970465 | 0.634378375 | 3.560919719 | 0.000369558 | 0.002862631 |
| ENSMUSG00000087293 | 8.384806947 | 2.262742317 | 0.874960295 | 2.58610857  | 0.009706635 | 0.042386463 |
| ENSMUSG00000062391 | 7.599543274 | 2.265931878 | 0.938420307 | 2.414623662 | 0.015751475 | 0.061865735 |
| ENSMUSG00000109428 | 21.10167601 | 2.266541918 | 0.631478038 | 3.589264838 | 0.000331612 | 0.002604887 |
| ENSMUSG00000022150 | 33.12682249 | 2.269400873 | 0.527045218 | 4.305894058 | 1.66E-05    | 0.000188654 |
| ENSMUSG00000070704 | 416.1546549 | 2.273221574 | 0.271825187 | 8.362806995 | 6.12E-17    | 3.73E-15    |
| ENSMUSG00000036853 | 50.46271017 | 2.275147748 | 0.461441956 | 4.930517735 | 8.20E-07    | 1.26E-05    |
| ENSMUSG00000030155 | 1136.569919 | 2.28374124  | 0.178423434 | 12.79955884 | 1.65E-37    | 4.43E-35    |
| ENSMUSG00000023122 | 594.5734811 | 2.286268014 | 0.251774742 | 9.0806091   | 1.08E-19    | 8.48E-18    |
| ENSMUSG00000106356 | 10.19287862 | 2.287046339 | 0.896815516 | 2.550185961 | 0.010766547 | 0.045976533 |
| ENSMUSG00000021314 | 70.32703739 | 2.291490249 | 0.378751656 | 6.050112824 | 1.45E-09    | 3.68E-08    |
| ENSMUSG00000073987 | 1687.158028 | 2.294046445 | 0.173592399 | 13.21513184 | 7.18E-40    | 2.16E-37    |
| ENSMUSG00000091269 | 63.33474973 | 2.299797442 | 0.387430366 | 5.936027852 | 2.92E-09    | 7.14E-08    |
| ENSMUSG00000106570 | 31.77208466 | 2.301135424 | 0.532665133 | 4.320041391 | 1.56E-05    | 0.000178591 |
| ENSMUSG00000025352 | 206.7993974 | 2.301632029 | 0.830026685 | 2.772961485 | 0.005554869 | 0.027018352 |
| ENSMUSG00000019990 | 61.53316072 | 2.304042342 | 0.408513935 | 5.640058128 | 1.70E-08    | 3.64E-07    |
| ENSMUSG00000079164 | 69.2141673  | 2.307385866 | 0.34083339  | 6.769835152 | 1.29E-11    | 4.37E-10    |
| ENSMUSG00000104936 | 32.26668928 | 2.317104559 | 0.495518375 | 4.676122371 | 2.92E-06    | 3.96E-05    |
| ENSMUSG00000109658 | 7.665474017 | 2.319545954 | 1.017836416 | 2.27889857  | 0.022673095 | 0.082337193 |
| ENSMUSG00000027375 | 15.93282988 | 2.320622579 | 0.714535207 | 3.247737211 | 0.001163267 | 0.007521603 |
| ENSMUSG00000073208 | 6.160524665 | 2.322485528 | 1.119521905 | 2.07453335  | 0.038029805 | 0.123145445 |
| ENSMUSG00000096547 | 6.830654169 | 2.322836266 | 0.955143111 | 2.43192485  | 0.015018823 | 0.059582637 |
| ENSMUSG00000105985 | 128.7399325 | 2.323644376 | 0.269108719 | 8.634593417 | 5.89E-18    | 4.02E-16    |
| ENSMUSG00000091475 | 16.97056569 | 2.32367823  | 0.670026501 | 3.468039288 | 0.000524271 | 0.003857393 |
| ENSMUSG00000106045 | 22.97372311 | 2.324681505 | 0.594385101 | 3.911069611 | 9.19E-05    | 0.000850997 |
| ENSMUSG00000095595 | 5.091022524 | 2.325381034 | 1.170329666 | 1.986945303 | 0.046928459 | 0.144431625 |
| ENSMUSG00000075014 | 64.90070639 | 2.325933051 | 0.434919826 | 5.347958204 | 8.90E-08    | 1.69E-06    |

|                    |             |             |             |             |             |             |
|--------------------|-------------|-------------|-------------|-------------|-------------|-------------|
| ENSMUSG00000022197 | 255.9654016 | 2.331665422 | 0.328834233 | 7.090701602 | 1.33E-12    | 5.11E-11    |
| ENSMUSG00000027016 | 95.90746419 | 2.3317076   | 0.35640683  | 6.542264069 | 6.06E-11    | 1.88E-09    |
| ENSMUSG00000113441 | 21.56028689 | 2.335037727 | 0.585706943 | 3.986699759 | 6.70E-05    | 0.000650474 |
| ENSMUSG00000069259 | 12.55696067 | 2.340323591 | 0.856487909 | 2.732465416 | 0.006286227 | 0.029880352 |
| ENSMUSG00000050982 | 1736.119641 | 2.352409914 | 0.523507552 | 4.49355488  | 7.00E-06    | 8.68E-05    |
| ENSMUSG00000096546 | 337.8171039 | 2.35330184  | 0.234838126 | 10.02095307 | 1.23E-23    | 1.30E-21    |
| ENSMUSG00000027669 | 16.16079497 | 2.361186872 | 0.700228424 | 3.372023743 | 0.00074618  | 0.005193684 |
| ENSMUSG00000113438 | 5.756851855 | 2.367414588 | 1.158250459 | 2.043957392 | 0.040957757 | 0.130373812 |
| ENSMUSG00000093985 | 9.723959575 | 2.370015506 | 0.946244138 | 2.504655418 | 0.012257074 | 0.050741602 |
| ENSMUSG00000037754 | 1545.391867 | 2.378583161 | 0.191766658 | 12.40352829 | 2.50E-35    | 5.93E-33    |
| ENSMUSG00000091697 | 11.15583039 | 2.380092286 | 0.767236139 | 3.102163944 | 0.001921115 | 0.011397391 |
| ENSMUSG00000030022 | 16.99521522 | 2.383925656 | 0.65165836  | 3.658244571 | 0.000253949 | 0.002055648 |
| ENSMUSG00000056978 | 67.91930063 | 2.393257866 | 0.395212687 | 6.05562003  | 1.40E-09    | 3.57E-08    |
| ENSMUSG00000032374 | 227.7541865 | 2.402971888 | 0.330354259 | 7.273924351 | 3.49E-13    | 1.41E-11    |
| ENSMUSG00000031561 | 247.402669  | 2.406299166 | 0.272874488 | 8.818336894 | 1.16E-18    | 8.33E-17    |
| ENSMUSG00000110877 | 5.204189298 | 2.410278095 | 1.111873093 | 2.167763668 | 0.030176672 | 0.102727824 |
| ENSMUSG00000095195 | 14.33033152 | 2.410928951 | 0.738739619 | 3.263570667 | 0.001100177 | 0.007203481 |
| ENSMUSG00000083618 | 5.451605957 | 2.414410957 | 1.20360018  | 2.005990857 | 0.044857223 | 0.139520354 |
| ENSMUSG00000055691 | 25.74281648 | 2.414922889 | 0.514708947 | 4.691822249 | 2.71E-06    | 3.71E-05    |
| ENSMUSG00000021999 | 6.175159568 | 2.416981038 | 1.18057804  | 2.047286123 | 0.04063     | 0.129533899 |
| ENSMUSG00000115264 | 21.704506   | 2.421057641 | 0.559806105 | 4.324814644 | 1.53E-05    | 0.000175217 |
| ENSMUSG00000038496 | 72.31957028 | 2.422700578 | 0.363108026 | 6.672120707 | 2.52E-11    | 8.23E-10    |
| ENSMUSG00000107814 | 5.091483404 | 2.42812994  | 1.195642916 | 2.03081531  | 0.042273733 | 0.133401235 |
| ENSMUSG00000102761 | 11.43372161 | 2.438336935 | 0.773551125 | 3.152134172 | 0.001620818 | 0.009911121 |
| ENSMUSG00000022490 | 22.85654822 | 2.445383313 | 0.57071794  | 4.284749337 | 1.83E-05    | 0.000205339 |
| ENSMUSG00000106557 | 12.90359205 | 2.447419687 | 0.747181289 | 3.27553664  | 0.001054614 | 0.006955977 |
| ENSMUSG00000102854 | 6.420984323 | 2.456479645 | 1.09852294  | 2.236165996 | 0.0253409   | 0.089974113 |
| ENSMUSG00000055214 | 338.3677571 | 2.456718615 | 0.230055233 | 10.67882083 | 1.28E-26    | 1.65E-24    |
| ENSMUSG00000105289 | 30.79736038 | 2.462552919 | 0.476247695 | 5.170739816 | 2.33E-07    | 4.03E-06    |

|                     |             |             |             |             |             |             |
|---------------------|-------------|-------------|-------------|-------------|-------------|-------------|
| ENSMUSG00000057074  | 636.0908309 | 2.469404515 | 0.242607673 | 10.17859198 | 2.47E-24    | 2.78E-22    |
| ENSMUSG00000067231  | 2797.030201 | 2.471174854 | 0.15345166  | 16.10393037 | 2.39E-58    | 1.40E-55    |
| ENSMUSG00000053161  | 14.19889283 | 2.474971579 | 0.752139919 | 3.290573359 | 0.000999834 | 0.006642033 |
| ENSMUSG00000080384  | 11.00094868 | 2.480886756 | 0.818236204 | 3.031993383 | 0.002429445 | 0.0138071   |
| ENSMUSG00000070342  | 4.364961146 | 2.487345166 | 1.254824691 | 1.982225233 | 0.047454038 | 0.145567056 |
| ENSMUSG00000074577  | 12.08246406 | 2.490242476 | 0.862763513 | 2.886355807 | 0.003897313 | 0.020221958 |
| ENSMUSG00000027070  | 7.631846123 | 2.496377103 | 1.005876068 | 2.481793913 | 0.013072286 | 0.053422217 |
| ENSMUSG00000097615  | 60.07111495 | 2.49832105  | 0.423947485 | 5.892996518 | 3.79E-09    | 9.13E-08    |
| ENSMUSG00000097815  | 8.749955513 | 2.508865305 | 0.970057441 | 2.586305924 | 0.009701079 | 0.042378796 |
| ENSMUSG00000068252  | 5.438797625 | 2.51302423  | 1.233494208 | 2.037321467 | 0.041617838 | 0.131985126 |
| ENSMUSG00000054630  | 196.8402695 | 2.513622466 | 0.343914123 | 7.308866654 | 2.69E-13    | 1.10E-11    |
| ENSMUSG00000015702  | 151.6022364 | 2.520804292 | 0.237725605 | 10.60384007 | 2.86E-26    | 3.58E-24    |
| ENSMUSG00000084539  | 5.435111913 | 2.529059682 | 1.122465703 | 2.253128693 | 0.024251036 | 0.086865138 |
| ENSMUSG00000052955  | 67.00285478 | 2.531701172 | 0.4747382   | 5.33283644  | 9.67E-08    | 1.82E-06    |
| ENSMUSG00000085093  | 7.509262309 | 2.533985978 | 1.11120286  | 2.280399079 | 0.02258403  | 0.082108206 |
| ENSMUSG00000020884  | 150.1886151 | 2.535928426 | 0.303974116 | 8.342580144 | 7.27E-17    | 4.37E-15    |
| ENSMUSG000000107666 | 24.09042944 | 2.536404731 | 0.609748623 | 4.159754752 | 3.19E-05    | 0.000334504 |
| ENSMUSG00000092460  | 10.7934308  | 2.549943044 | 0.850634025 | 2.997696976 | 0.00272028  | 0.015196635 |
| ENSMUSG00000038233  | 122.7296058 | 2.553099015 | 0.398568317 | 6.405674774 | 1.50E-10    | 4.42E-09    |
| ENSMUSG00000023094  | 362.0357156 | 2.561296913 | 0.23813416  | 10.75568877 | 5.57E-27    | 7.49E-25    |
| ENSMUSG00000040339  | 149.0931886 | 2.563013644 | 0.250035901 | 10.25058257 | 1.18E-24    | 1.35E-22    |
| ENSMUSG00000064620  | 4.340266288 | 2.569994721 | 1.301138223 | 1.975189627 | 0.048246633 | 0.147289275 |
| ENSMUSG00000036356  | 61.33705072 | 2.57924216  | 0.36483267  | 7.069657883 | 1.55E-12    | 5.90E-11    |
| ENSMUSG00000021219  | 6.605660983 | 2.579769985 | 1.059547277 | 2.434785159 | 0.014900634 | 0.059307342 |
| ENSMUSG00000046470  | 15.26376788 | 2.580395432 | 0.791499777 | 3.260134125 | 0.001113595 | 0.007276382 |
| ENSMUSG00000030228  | 419.0295975 | 2.581307264 | 0.222262737 | 11.6137653  | 3.51E-31    | 6.63E-29    |
| ENSMUSG00000031364  | 6.842930842 | 2.58362397  | 0.979555408 | 2.637547555 | 0.008350792 | 0.037626634 |
| ENSMUSG000000112793 | 8.992810226 | 2.583800618 | 0.890644098 | 2.901047259 | 0.003719178 | 0.019473183 |
| ENSMUSG00000032017  | 220.4073407 | 2.584068467 | 0.272078273 | 9.497518623 | 2.15E-21    | 1.96E-19    |

|                    |             |             |             |             |             |             |
|--------------------|-------------|-------------|-------------|-------------|-------------|-------------|
| ENSMUSG00000020937 | 302.6995325 | 2.587463838 | 0.243768866 | 10.61441472 | 2.55E-26    | 3.22E-24    |
| ENSMUSG00000086777 | 39.21008082 | 2.588889201 | 0.472365624 | 5.480689263 | 4.24E-08    | 8.46E-07    |
| ENSMUSG00000038408 | 6.963890167 | 2.607769731 | 1.017775997 | 2.562223651 | 0.010400432 | 0.044724519 |
| ENSMUSG00000021613 | 14.03773797 | 2.615297438 | 0.741428826 | 3.52737491  | 0.000419702 | 0.003192283 |
| ENSMUSG00000065581 | 83.66685945 | 2.616017441 | 0.339181992 | 7.712725029 | 1.23E-14    | 5.96E-13    |
| ENSMUSG00000096942 | 1706.326771 | 2.618515892 | 0.120916295 | 21.655608   | 5.38E-104   | 1.50E-100   |
| ENSMUSG00000072966 | 19.18611089 | 2.624770255 | 0.641657073 | 4.090612206 | 4.30E-05    | 0.000438381 |
| ENSMUSG00000024503 | 1017.377744 | 2.627268705 | 0.229734361 | 11.43611559 | 2.76E-30    | 4.77E-28    |
| ENSMUSG00000038656 | 9.115402602 | 2.632036165 | 0.97153864  | 2.709142032 | 0.006745746 | 0.031684261 |
| ENSMUSG00000105495 | 18.2148389  | 2.64031515  | 0.711400542 | 3.711432582 | 0.00020609  | 0.00172264  |
| ENSMUSG00000111118 | 8.974041609 | 2.651755259 | 1.086832684 | 2.439892817 | 0.01469162  | 0.058653387 |
| ENSMUSG00000093610 | 8.284608521 | 2.652479037 | 0.910692386 | 2.912596038 | 0.00358438  | 0.018897222 |
| ENSMUSG00000022037 | 1388.539088 | 2.661035096 | 0.16907449  | 15.73883258 | 8.19E-56    | 4.25E-53    |
| ENSMUSG00000003477 | 51.76717386 | 2.665602569 | 0.464116843 | 5.743386846 | 9.28E-09    | 2.09E-07    |
| ENSMUSG00000058625 | 41.19294377 | 2.666000307 | 0.529614991 | 5.033846008 | 4.81E-07    | 7.77E-06    |
| ENSMUSG00000027340 | 5024.686305 | 2.678481229 | 0.149492888 | 17.91711474 | 8.67E-72    | 8.79E-69    |
| ENSMUSG00000020620 | 26.79539908 | 2.681262874 | 0.5483883   | 4.889350985 | 1.01E-06    | 1.52E-05    |
| ENSMUSG00000031274 | 7.278709873 | 2.688637053 | 1.026698494 | 2.618721143 | 0.008826006 | 0.039326427 |
| ENSMUSG00000062624 | 14.79135239 | 2.692686567 | 0.708711727 | 3.799410202 | 0.000145041 | 0.001263992 |
| ENSMUSG00000016386 | 9.652456231 | 2.704718947 | 1.035010616 | 2.613228217 | 0.008969139 | 0.03981305  |
| ENSMUSG00000108124 | 14.99602106 | 2.709341502 | 0.703192835 | 3.852913975 | 0.00011672  | 0.001047056 |
| ENSMUSG00000032108 | 40.06246987 | 2.711037386 | 0.516431221 | 5.249561363 | 1.52E-07    | 2.76E-06    |
| ENSMUSG00000030222 | 6.370105628 | 2.720576561 | 1.163781254 | 2.337704403 | 0.019402588 | 0.072722203 |
| ENSMUSG00000081888 | 5.074651143 | 2.721078563 | 1.20919618  | 2.250320178 | 0.024428628 | 0.087332932 |
| ENSMUSG00000086184 | 24.18658111 | 2.732430493 | 0.599297243 | 4.559391063 | 5.13E-06    | 6.62E-05    |
| ENSMUSG00000079174 | 4125.183754 | 2.739508633 | 0.50688074  | 5.404641406 | 6.49E-08    | 1.27E-06    |
| ENSMUSG00000093580 | 59.58375553 | 2.742355173 | 0.391186682 | 7.010349025 | 2.38E-12    | 8.84E-11    |
| ENSMUSG00000111512 | 10.00874502 | 2.743109358 | 0.888074713 | 3.088827232 | 0.002009483 | 0.01183273  |
| ENSMUSG00000052560 | 12.43032367 | 2.743575957 | 1.106086129 | 2.480436094 | 0.013122178 | 0.053585405 |



|                    |             |             |             |             |             |             |
|--------------------|-------------|-------------|-------------|-------------|-------------|-------------|
| ENSMUSG00000105622 | 32.59482476 | 2.744667402 | 0.523008723 | 5.247842493 | 1.54E-07    | 2.77E-06    |
| ENSMUSG00000079516 | 598.3054498 | 2.746999736 | 0.244437697 | 11.2380364  | 2.65E-29    | 4.35E-27    |
| ENSMUSG00000085980 | 12.24624137 | 2.754571876 | 0.881240381 | 3.125789439 | 0.001773285 | 0.010650163 |
| ENSMUSG00000111943 | 14.29189602 | 2.758733169 | 1.002619471 | 2.751525628 | 0.005931838 | 0.028460825 |
| ENSMUSG00000049037 | 26.06458387 | 2.760913165 | 0.589405232 | 4.684235928 | 2.81E-06    | 3.84E-05    |
| ENSMUSG00000025993 | 1333.590937 | 2.767724766 | 0.161333555 | 17.15529521 | 5.74E-66    | 4.13E-63    |
| ENSMUSG00000040260 | 4.996259167 | 2.774858374 | 1.317496706 | 2.106159629 | 0.035190489 | 0.115903572 |
| ENSMUSG00000104368 | 589.9847428 | 2.776956892 | 0.227693813 | 12.19601385 | 3.26E-34    | 7.43E-32    |
| ENSMUSG00000111218 | 4.978393844 | 2.777468623 | 1.248744609 | 2.2242087   | 0.026134406 | 0.09214599  |
| ENSMUSG00000034459 | 287.0282468 | 2.782046103 | 0.574918973 | 4.839022949 | 1.30E-06    | 1.91E-05    |
| ENSMUSG00000081053 | 10.64756106 | 2.791883729 | 0.948276688 | 2.944165731 | 0.003238265 | 0.017460483 |
| ENSMUSG00000054720 | 86.20908227 | 2.798083585 | 0.475387341 | 5.885902598 | 3.96E-09    | 9.48E-08    |
| ENSMUSG00000111761 | 13.39623119 | 2.803862551 | 0.765501507 | 3.662778619 | 0.000249494 | 0.002026947 |
| ENSMUSG00000037679 | 4128.296631 | 2.810560479 | 0.55978149  | 5.0208171   | 5.15E-07    | 8.24E-06    |
| ENSMUSG00000062168 | 157.7400691 | 2.811809375 | 0.33677741  | 8.34916266  | 6.87E-17    | 4.14E-15    |
| ENSMUSG00000058488 | 42.64148459 | 2.813074673 | 0.541654097 | 5.193489143 | 2.06E-07    | 3.62E-06    |
| ENSMUSG00000111962 | 5.315265327 | 2.813782016 | 1.171696831 | 2.401459099 | 0.016329834 | 0.063577451 |
| ENSMUSG00000032065 | 10.70048297 | 2.817521282 | 0.851956442 | 3.307118937 | 0.000942609 | 0.006328735 |
| ENSMUSG00000102185 | 26.23713367 | 2.823240378 | 0.633335177 | 4.457734987 | 8.28E-06    | 0.000100555 |
| ENSMUSG00000082809 | 129.4922916 | 2.841430766 | 0.388380684 | 7.316097023 | 2.55E-13    | 1.05E-11    |
| ENSMUSG00000030472 | 598.8943347 | 2.857393382 | 0.192279847 | 14.86059733 | 5.94E-50    | 2.50E-47    |
| ENSMUSG00000029716 | 106.3412975 | 2.859822278 | 0.343370646 | 8.328674317 | 8.18E-17    | 4.86E-15    |
| ENSMUSG00000105442 | 37.56128038 | 2.86180281  | 0.560151366 | 5.108981219 | 3.24E-07    | 5.44E-06    |
| ENSMUSG00000067229 | 634.3502806 | 2.86597305  | 0.258478686 | 11.08785058 | 1.44E-28    | 2.21E-26    |
| ENSMUSG00000047564 | 9.587510187 | 2.880790498 | 0.916536653 | 3.143126342 | 0.001671537 | 0.010158979 |
| ENSMUSG00000090175 | 272.7612918 | 2.881644588 | 0.2261145   | 12.74418307 | 3.36E-37    | 8.92E-35    |
| ENSMUSG00000022650 | 232.0133586 | 2.882345403 | 0.989408206 | 2.913201431 | 0.003577438 | 0.018874009 |
| ENSMUSG00000103951 | 8.029897528 | 2.889111669 | 1.116847942 | 2.586844243 | 0.009685936 | 0.04232679  |
| ENSMUSG00000062488 | 62.11311364 | 2.892406838 | 0.451399337 | 6.407645301 | 1.48E-10    | 4.37E-09    |

|                    |             |             |             |             |             |             |
|--------------------|-------------|-------------|-------------|-------------|-------------|-------------|
| ENSMUSG00000079386 | 13.37274832 | 2.89301246  | 0.98799262  | 2.928172136 | 0.003409612 | 0.018212638 |
| ENSMUSG00000074882 | 1143.075767 | 2.898113361 | 0.43388367  | 6.679470934 | 2.40E-11    | 7.91E-10    |
| ENSMUSG00000092021 | 24.03465867 | 2.901437008 | 0.612137124 | 4.739848141 | 2.14E-06    | 2.99E-05    |
| ENSMUSG00000032028 | 11.43593758 | 2.908055709 | 0.850200457 | 3.420435364 | 0.00062521  | 0.004473149 |
| ENSMUSG00000088626 | 4.058499082 | 2.909405627 | 1.36691599  | 2.12844509  | 0.033300198 | 0.111171814 |
| ENSMUSG00000063446 | 22.0890906  | 2.910089531 | 0.625063634 | 4.655669236 | 3.23E-06    | 4.34E-05    |
| ENSMUSG00000056487 | 4.021944696 | 2.910126805 | 1.39230522  | 2.090150035 | 0.036604324 | 0.119553754 |
| ENSMUSG00000097091 | 8.462224103 | 2.910516733 | 0.940418992 | 3.094914882 | 0.001968694 | 0.011642493 |
| ENSMUSG00000115301 | 8.023543177 | 2.912900755 | 1.305952741 | 2.230479453 | 0.02571563  | 0.09095706  |
| ENSMUSG00000100706 | 13.49541892 | 2.915034474 | 0.789485386 | 3.692322272 | 0.000222216 | 0.001838142 |
| ENSMUSG00000106450 | 20.4876588  | 2.917123431 | 0.627210847 | 4.650945447 | 3.30E-06    | 4.43E-05    |
| ENSMUSG00000026874 | 13.77140961 | 2.918495966 | 0.741234398 | 3.937345562 | 8.24E-05    | 0.000775901 |
| ENSMUSG00000100211 | 4.120209206 | 2.951341616 | 1.349634908 | 2.186770362 | 0.028759292 | 0.099097802 |
| ENSMUSG00000111296 | 33.11972124 | 2.984959326 | 0.583716287 | 5.113716016 | 3.16E-07    | 5.31E-06    |
| ENSMUSG00000045658 | 168.5041749 | 2.994596965 | 0.336812163 | 8.891000081 | 6.06E-19    | 4.41E-17    |
| ENSMUSG00000058427 | 85.69776447 | 3.012786164 | 0.469281312 | 6.4200003   | 1.36E-10    | 4.05E-09    |
| ENSMUSG00000115647 | 6.041857692 | 3.026437773 | 1.412674482 | 2.142346175 | 0.032165636 | 0.108242922 |
| ENSMUSG00000096574 | 7.269709977 | 3.029892853 | 1.107337343 | 2.736196763 | 0.006215385 | 0.029573138 |
| ENSMUSG00000025004 | 4.49355546  | 3.035088942 | 1.292136225 | 2.348892388 | 0.018829348 | 0.071070726 |
| ENSMUSG00000103349 | 8.754108647 | 3.037449046 | 1.080604344 | 2.810879914 | 0.004940622 | 0.024615911 |
| ENSMUSG00000026822 | 747.7796349 | 3.042000401 | 0.689138385 | 4.414208333 | 1.01E-05    | 0.000120435 |
| ENSMUSG00000089957 | 45.88686414 | 3.046214543 | 0.472976056 | 6.440525903 | 1.19E-10    | 3.57E-09    |
| ENSMUSG00000044548 | 615.4990809 | 3.060895986 | 0.201453305 | 15.19407185 | 3.87E-52    | 1.84E-49    |
| ENSMUSG00000013415 | 7.577392972 | 3.063581223 | 1.050477398 | 2.916370431 | 0.003541298 | 0.018741915 |
| ENSMUSG00000029369 | 382.9428488 | 3.068956494 | 0.25705964  | 11.93869442 | 7.44E-33    | 1.49E-30    |
| ENSMUSG00000034258 | 127.4200525 | 3.07622532  | 0.393217364 | 7.823218405 | 5.15E-15    | 2.59E-13    |
| ENSMUSG00000053054 | 8962.662093 | 3.098081067 | 0.177792453 | 17.4252676  | 5.31E-68    | 4.55E-65    |
| ENSMUSG00000035916 | 34.69571919 | 3.109615587 | 0.526613082 | 5.904934178 | 3.53E-09    | 8.54E-08    |
| ENSMUSG00000093563 | 5.035738589 | 3.114017805 | 1.359420993 | 2.290694216 | 0.021981105 | 0.080321257 |

|                    |             |             |             |             |             |             |
|--------------------|-------------|-------------|-------------|-------------|-------------|-------------|
| ENSMUSG00000063683 | 4.541058975 | 3.117903238 | 1.388966356 | 2.244765126 | 0.024783215 | 0.088431868 |
| ENSMUSG00000012428 | 314.9470561 | 3.124688197 | 0.669003951 | 4.670657315 | 3.00E-06    | 4.06E-05    |
| ENSMUSG00000075015 | 6.237638518 | 3.130909513 | 1.228889326 | 2.547755479 | 0.010841843 | 0.046256734 |
| ENSMUSG00000104291 | 6.552879288 | 3.143668088 | 1.158310367 | 2.714011873 | 0.006647378 | 0.031274934 |
| ENSMUSG00000021228 | 14.18413578 | 3.145262701 | 0.771479864 | 4.076921314 | 4.56E-05    | 0.000463657 |
| ENSMUSG00000085068 | 31.58906175 | 3.151827202 | 0.587207977 | 5.367480224 | 7.98E-08    | 1.54E-06    |
| ENSMUSG00000074892 | 338.0144952 | 3.158109261 | 0.873893273 | 3.613838622 | 0.000301697 | 0.002401193 |
| ENSMUSG00000013653 | 303.5019023 | 3.15840635  | 0.259215501 | 12.18448103 | 3.76E-34    | 8.47E-32    |
| ENSMUSG00000017765 | 57.17326137 | 3.178942356 | 0.400664186 | 7.934181464 | 2.12E-15    | 1.11E-13    |
| ENSMUSG00000034764 | 62.64429815 | 3.182778663 | 0.411186416 | 7.7404762   | 9.90E-15    | 4.84E-13    |
| ENSMUSG00000097762 | 12.01445788 | 3.200556777 | 0.982411811 | 3.257856574 | 0.001122571 | 0.007317878 |
| ENSMUSG00000101189 | 12.07384641 | 3.205075753 | 0.880472977 | 3.64017504  | 0.000272453 | 0.002191908 |
| ENSMUSG00000025909 | 10.09385912 | 3.207302994 | 0.954622104 | 3.35976192  | 0.000780097 | 0.005374401 |
| ENSMUSG00000113798 | 10.10910842 | 3.215600291 | 0.92104286  | 3.491260213 | 0.000480748 | 0.003585566 |
| ENSMUSG00000096488 | 4.958069266 | 3.226079281 | 1.360700583 | 2.370895789 | 0.017745034 | 0.067808772 |
| ENSMUSG00000047414 | 8.335542455 | 3.239430179 | 1.216930091 | 2.661969001 | 0.007768503 | 0.035522943 |
| ENSMUSG00000020333 | 494.6984053 | 3.244956492 | 0.280646953 | 11.56241483 | 6.39E-31    | 1.18E-28    |
| ENSMUSG00000019888 | 176.0785805 | 3.248547102 | 0.256731838 | 12.6534641  | 1.07E-36    | 2.65E-34    |
| ENSMUSG00000098915 | 30.89459255 | 3.249490162 | 0.89182239  | 3.643651695 | 0.000268797 | 0.002164059 |
| ENSMUSG00000021539 | 805.3983347 | 3.252892745 | 0.233891333 | 13.90770964 | 5.69E-44    | 2.05E-41    |
| ENSMUSG00000085180 | 38.49415184 | 3.256621613 | 0.524783787 | 6.205644486 | 5.45E-10    | 1.47E-08    |
| ENSMUSG00000022705 | 14.42360947 | 3.280211337 | 0.824624258 | 3.977825422 | 6.95E-05    | 0.000670557 |
| ENSMUSG00000032204 | 20.85976281 | 3.290768422 | 0.638399322 | 5.154717917 | 2.54E-07    | 4.37E-06    |
| ENSMUSG00000031298 | 150.7442501 | 3.305343888 | 0.398411563 | 8.296305125 | 1.07E-16    | 6.22E-15    |
| ENSMUSG00000104363 | 10.76007848 | 3.310591514 | 0.91321803  | 3.625192895 | 0.000288746 | 0.002309656 |
| ENSMUSG00000034295 | 39.06602167 | 3.31598874  | 0.487221153 | 6.805921128 | 1.00E-11    | 3.44E-10    |
| ENSMUSG00000029602 | 176.6028415 | 3.321769235 | 0.367419808 | 9.040800638 | 1.56E-19    | 1.20E-17    |
| ENSMUSG00000107198 | 19.77703697 | 3.329126653 | 0.666881258 | 4.99208309  | 5.97E-07    | 9.37E-06    |
| ENSMUSG00000030226 | 363.0749649 | 3.348126366 | 0.249224101 | 13.43419979 | 3.81E-41    | 1.25E-38    |

|                    |             |             |             |             |             |             |
|--------------------|-------------|-------------|-------------|-------------|-------------|-------------|
| ENSMUSG00000106352 | 27.24740036 | 3.353164293 | 0.626909681 | 5.348719912 | 8.86E-08    | 1.68E-06    |
| ENSMUSG00000031253 | 7.403126676 | 3.356351096 | 1.12116604  | 2.993625365 | 0.002756842 | 0.015357751 |
| ENSMUSG00000032808 | 21.77031084 | 3.376344933 | 0.795491722 | 4.244349553 | 2.19E-05    | 0.00023991  |
| ENSMUSG00000035472 | 37.48524231 | 3.391181597 | 0.564989968 | 6.002197896 | 1.95E-09    | 4.88E-08    |
| ENSMUSG00000097339 | 159.4875578 | 3.410994005 | 0.304517242 | 11.20131648 | 4.02E-29    | 6.54E-27    |
| ENSMUSG00000110654 | 7.455311568 | 3.427856193 | 1.095548754 | 3.128894247 | 0.001754654 | 0.01056209  |
| ENSMUSG00000100009 | 3.769286364 | 3.434572297 | 1.628938505 | 2.108472656 | 0.034990126 | 0.115414986 |
| ENSMUSG00000055653 | 134.1041583 | 3.459775449 | 0.709391796 | 4.877101012 | 1.08E-06    | 1.61E-05    |
| ENSMUSG00000038917 | 180.022174  | 3.462533324 | 0.264311955 | 13.10017673 | 3.28E-39    | 9.77E-37    |
| ENSMUSG00000112831 | 213.2135482 | 3.476307857 | 0.338521804 | 10.2690811  | 9.71E-25    | 1.14E-22    |
| ENSMUSG00000087389 | 5.778678524 | 3.483696451 | 1.239208875 | 2.811226196 | 0.004935308 | 0.024600424 |
| ENSMUSG00000100237 | 15.55915933 | 3.487489247 | 0.802506556 | 4.345745493 | 1.39E-05    | 0.000160386 |
| ENSMUSG00000107451 | 5.821426575 | 3.506531677 | 1.285866827 | 2.726978878 | 0.006391713 | 0.030263608 |
| ENSMUSG00000026614 | 984.4184986 | 3.506709102 | 0.516596497 | 6.788100818 | 1.14E-11    | 3.88E-10    |
| ENSMUSG00000106478 | 4.274909518 | 3.515547571 | 1.485258723 | 2.366959719 | 0.017934885 | 0.068428719 |
| ENSMUSG00000029522 | 66.638471   | 3.520091473 | 0.40954062  | 8.595219383 | 8.31E-18    | 5.57E-16    |
| ENSMUSG00000086353 | 9.935405549 | 3.522277936 | 0.982201977 | 3.586103488 | 0.000335656 | 0.002632018 |
| ENSMUSG00000018340 | 998.5264931 | 3.530398475 | 0.163286325 | 21.62090715 | 1.14E-103   | 2.83E-100   |
| ENSMUSG00000060044 | 24.49146145 | 3.538258023 | 0.672793693 | 5.259053496 | 1.45E-07    | 2.63E-06    |
| ENSMUSG00000091639 | 206.7573728 | 3.552977547 | 0.30018986  | 11.83576803 | 2.55E-32    | 5.08E-30    |
| ENSMUSG00000071716 | 87.5444964  | 3.560061019 | 0.385427132 | 9.236664268 | 2.54E-20    | 2.10E-18    |
| ENSMUSG00000111378 | 4.442329665 | 3.562872077 | 1.605145811 | 2.219656341 | 0.026442105 | 0.093070808 |
| ENSMUSG00000023868 | 16.8541276  | 3.5844224   | 0.734385532 | 4.880845607 | 1.06E-06    | 1.58E-05    |
| ENSMUSG00000032796 | 11.07159697 | 3.591640447 | 0.998463959 | 3.597165841 | 0.000321703 | 0.002535987 |
| ENSMUSG00000106526 | 36.45585725 | 3.594550912 | 0.535782762 | 6.708970806 | 1.96E-11    | 6.50E-10    |
| ENSMUSG00000087201 | 10.96020113 | 3.601221107 | 1.059787703 | 3.398058966 | 0.000678658 | 0.004794029 |
| ENSMUSG00000068341 | 15.79195719 | 3.666384471 | 0.820446725 | 4.468766051 | 7.87E-06    | 9.62E-05    |
| ENSMUSG00000111429 | 4.378652146 | 3.670564075 | 1.443944001 | 2.542040461 | 0.011020741 | 0.046814011 |
| ENSMUSG00000095134 | 52.89602135 | 3.693585623 | 0.697519518 | 5.295315083 | 1.19E-07    | 2.20E-06    |

|                    |             |             |             |             |             |             |
|--------------------|-------------|-------------|-------------|-------------|-------------|-------------|
| ENSMUSG00000071042 | 49.54168218 | 3.753433833 | 0.493280173 | 7.609131758 | 2.76E-14    | 1.27E-12    |
| ENSMUSG00000105762 | 36.59970003 | 3.765448752 | 0.600469778 | 6.270838086 | 3.59E-10    | 1.00E-08    |
| ENSMUSG00000114547 | 284.6853464 | 3.783642957 | 0.305368988 | 12.39039689 | 2.95E-35    | 6.92E-33    |
| ENSMUSG00000015401 | 148.2329768 | 3.813691305 | 0.331349866 | 11.50956044 | 1.18E-30    | 2.16E-28    |
| ENSMUSG00000029700 | 2139.800296 | 3.815389043 | 0.141370713 | 26.98853926 | 2.01E-160   | 1.50E-156   |
| ENSMUSG00000099974 | 4.941504489 | 3.84480739  | 1.480303504 | 2.597310199 | 0.009395703 | 0.041325549 |
| ENSMUSG00000109084 | 38.04499119 | 3.864164451 | 0.51389984  | 7.519294911 | 5.51E-14    | 2.46E-12    |
| ENSMUSG00000048473 | 1490.293737 | 3.889330801 | 0.145799096 | 26.67595961 | 8.95E-157   | 4.99E-153   |
| ENSMUSG00000040808 | 3654.197894 | 3.904271509 | 0.489827499 | 7.970707077 | 1.58E-15    | 8.40E-14    |
| ENSMUSG00000029661 | 23.67655739 | 3.916063031 | 0.690412826 | 5.672060084 | 1.41E-08    | 3.07E-07    |
| ENSMUSG00000038704 | 18.33499491 | 3.917391903 | 1.091620316 | 3.588602965 | 0.000332455 | 0.00260967  |
| ENSMUSG00000097837 | 5.115658734 | 3.927432327 | 1.443280509 | 2.721184346 | 0.006504848 | 0.030706722 |
| ENSMUSG00000025002 | 1666.719948 | 3.934886278 | 0.225609386 | 17.4411462  | 4.02E-68    | 3.59E-65    |
| ENSMUSG00000019893 | 3075.743441 | 3.968402441 | 0.217576954 | 18.23907531 | 2.53E-74    | 3.76E-71    |
| ENSMUSG00000105184 | 10.81283181 | 3.993338296 | 0.993931321 | 4.017720554 | 5.88E-05    | 0.000577055 |
| ENSMUSG00000070690 | 12.33992042 | 4.078460773 | 1.113053263 | 3.664209888 | 0.000248103 | 0.002017117 |
| ENSMUSG00000110055 | 5.965103793 | 4.105421463 | 1.410440848 | 2.910736362 | 0.003605781 | 0.018992094 |
| ENSMUSG00000092465 | 8.942558783 | 4.132587391 | 1.163648872 | 3.551404112 | 0.000383182 | 0.002949718 |
| ENSMUSG00000054005 | 15.85579321 | 4.159896623 | 0.876232516 | 4.747480318 | 2.06E-06    | 2.89E-05    |
| ENSMUSG00000026365 | 12.4753013  | 4.215654334 | 1.089534273 | 3.869225997 | 0.000109181 | 0.000988974 |
| ENSMUSG00000089694 | 6.65781035  | 4.221798452 | 1.366586941 | 3.089301036 | 0.00200628  | 0.011824011 |
| ENSMUSG00000110353 | 7.125361303 | 4.328674822 | 1.317282644 | 3.286063807 | 0.00101598  | 0.006733245 |
| ENSMUSG00000054417 | 18.2764192  | 4.349869836 | 0.922926724 | 4.71312589  | 2.44E-06    | 3.37E-05    |
| ENSMUSG00000105296 | 127.3166254 | 4.39031704  | 0.451435307 | 9.725240732 | 2.35E-22    | 2.30E-20    |
| ENSMUSG00000071356 | 72350.83583 | 4.454012652 | 1.098427769 | 4.054898079 | 5.02E-05    | 0.000503844 |
| ENSMUSG00000030017 | 102855.242  | 4.464544731 | 0.822816169 | 5.425932184 | 5.77E-08    | 1.13E-06    |
| ENSMUSG00000088854 | 4.189302885 | 4.523541309 | 1.611025585 | 2.807864351 | 0.004987123 | 0.024781156 |
| ENSMUSG00000028883 | 68.75021082 | 4.575354569 | 0.494503364 | 9.252423548 | 2.19E-20    | 1.82E-18    |
| ENSMUSG00000107092 | 221.5688632 | 4.584278534 | 0.316307234 | 14.49311949 | 1.34E-47    | 5.33E-45    |

|                    |             |             |             |             |             |             |
|--------------------|-------------|-------------|-------------|-------------|-------------|-------------|
| ENSMUSG00000026824 | 190.6323882 | 4.601421093 | 0.341954784 | 13.45622669 | 2.83E-41    | 9.56E-39    |
| ENSMUSG00000054580 | 106.9711339 | 4.612526341 | 0.431648207 | 10.68584618 | 1.19E-26    | 1.56E-24    |
| ENSMUSG00000042816 | 8.792105462 | 4.648240766 | 1.308447446 | 3.552485642 | 0.00038161  | 0.002940664 |
| ENSMUSG00000113407 | 21.3305368  | 4.676887264 | 0.831598744 | 5.623971051 | 1.87E-08    | 3.97E-07    |
| ENSMUSG00000089675 | 8.727331193 | 4.701943804 | 1.31615388  | 3.572487895 | 0.000353606 | 0.002752448 |
| ENSMUSG00000104664 | 118.4804981 | 4.719101952 | 0.436526796 | 10.81056648 | 3.07E-27    | 4.17E-25    |
| ENSMUSG00000004110 | 8.884337117 | 4.730150245 | 1.340083732 | 3.529742309 | 0.000415965 | 0.003172513 |
| ENSMUSG00000032099 | 27.64211045 | 4.796523862 | 0.831812615 | 5.76635143  | 8.10E-09    | 1.84E-07    |
| ENSMUSG00000091894 | 5.171940894 | 4.839261731 | 1.522803187 | 3.177864201 | 0.001483642 | 0.009185648 |
| ENSMUSG00000091694 | 5.280619626 | 4.872227212 | 1.542257369 | 3.15915314  | 0.001582283 | 0.009715446 |
| ENSMUSG00000001870 | 15.79154036 | 4.947985958 | 1.013267073 | 4.883200184 | 1.04E-06    | 1.56E-05    |
| ENSMUSG00000004814 | 58.38233218 | 4.95856373  | 0.589055825 | 8.417816311 | 3.84E-17    | 2.40E-15    |
| ENSMUSG00000102698 | 10.54468398 | 4.988919828 | 1.347897446 | 3.701260687 | 0.000214531 | 0.001783173 |
| ENSMUSG00000032289 | 1418.855251 | 4.994936705 | 0.693925267 | 7.198090259 | 6.11E-13    | 2.44E-11    |
| ENSMUSG00000079055 | 62.9778844  | 5.07703369  | 1.767164959 | 2.872982324 | 0.004066169 | 0.02096568  |
| ENSMUSG00000106397 | 270.0492316 | 5.109882482 | 0.354020167 | 14.43387398 | 3.17E-47    | 1.24E-44    |
| ENSMUSG00000028864 | 146.4931207 | 5.209846723 | 1.094103704 | 4.761748548 | 1.92E-06    | 2.72E-05    |
| ENSMUSG00000020062 | 2410.803436 | 5.293384324 | 0.178711561 | 29.61970838 | 8.33E-193   | 1.86E-188   |
| ENSMUSG00000052726 | 59.80515308 | 5.334022991 | 0.598625081 | 8.910456908 | 5.08E-19    | 3.74E-17    |
| ENSMUSG00000027902 | 81.59171178 | 5.362711858 | 0.502276935 | 10.67680295 | 1.31E-26    | 1.68E-24    |
| ENSMUSG00000021758 | 3.832822371 | 5.413468845 | 1.698141777 | 3.187878019 | 0.00143321  | 0.008925443 |
| ENSMUSG00000105086 | 3.943902319 | 5.449682846 | 1.671691976 | 3.259980262 | 0.0011142   | 0.007278198 |
| ENSMUSG00000032841 | 383.8711142 | 5.735495817 | 0.602490814 | 9.519640279 | 1.74E-21    | 1.61E-19    |
| ENSMUSG00000113174 | 4.866729223 | 5.756774546 | 1.564739423 | 3.679062764 | 0.000234093 | 0.001920007 |
| ENSMUSG00000016150 | 56.82368853 | 5.83767639  | 0.666181445 | 8.762892506 | 1.90E-18    | 1.34E-16    |
| ENSMUSG00000043556 | 61.2433394  | 5.89055374  | 1.197519734 | 4.918961728 | 8.70E-07    | 1.33E-05    |
| ENSMUSG00000029371 | 20.08433058 | 5.938829982 | 1.143403264 | 5.193994251 | 2.06E-07    | 3.62E-06    |
| ENSMUSG00000113332 | 5.721197169 | 5.989618187 | 1.518973838 | 3.943200361 | 8.04E-05    | 0.000760082 |
| ENSMUSG00000097940 | 5.838953009 | 6.02060346  | 1.529956483 | 3.935146866 | 8.31E-05    | 0.000782534 |

|                    |             |             |             |             |             |             |
|--------------------|-------------|-------------|-------------|-------------|-------------|-------------|
| ENSMUSG00000113646 | 6.019194183 | 6.063897183 | 1.527949517 | 3.968650217 | 7.23E-05    | 0.000693903 |
| ENSMUSG00000059654 | 36193.22533 | 6.084203601 | 0.503667825 | 12.07979405 | 1.35E-33    | 2.98E-31    |
| ENSMUSG00000106303 | 47.00134603 | 6.137893064 | 0.827040462 | 7.421514845 | 1.16E-13    | 4.93E-12    |
| ENSMUSG00000115381 | 6.433877346 | 6.161674888 | 1.593382988 | 3.86703946  | 0.000110165 | 0.000996066 |
| ENSMUSG00000113344 | 13.26802589 | 6.224405439 | 1.351723596 | 4.604791585 | 4.13E-06    | 5.45E-05    |
| ENSMUSG00000042540 | 38.9624666  | 6.316274629 | 0.984682926 | 6.414526406 | 1.41E-10    | 4.19E-09    |
| ENSMUSG00000027716 | 114.7186765 | 6.427612528 | 0.580806092 | 11.06670989 | 1.82E-28    | 2.76E-26    |
| ENSMUSG00000027048 | 8.461365686 | 6.553344748 | 1.430392841 | 4.581499964 | 4.62E-06    | 6.01E-05    |
| ENSMUSG00000115724 | 8.47953108  | 6.56083807  | 1.553286581 | 4.223842625 | 2.40E-05    | 0.000259751 |
| ENSMUSG00000113411 | 9.166840713 | 6.671438247 | 1.405607592 | 4.746302087 | 2.07E-06    | 2.91E-05    |
| ENSMUSG00000031554 | 10.69473875 | 6.89537612  | 1.42076548  | 4.853282415 | 1.21E-06    | 1.80E-05    |
| ENSMUSG00000060371 | 11.72863443 | 7.023889542 | 1.393994303 | 5.038678801 | 4.69E-07    | 7.60E-06    |
| ENSMUSG00000113036 | 64.07690998 | 7.040848753 | 0.946079111 | 7.442135304 | 9.91E-14    | 4.28E-12    |
| ENSMUSG00000079014 | 15.35130857 | 7.409970182 | 1.425019314 | 5.199908596 | 1.99E-07    | 3.52E-06    |
| ENSMUSG00000111065 | 19.04955391 | 7.723365789 | 1.305386574 | 5.916535336 | 3.29E-09    | 7.98E-08    |
| ENSMUSG00000093846 | 82.69335678 | 8.877464447 | 1.23575199  | 7.18385608  | 6.78E-13    | 2.68E-11    |

symbol  
Gm28049  
3632451O06Rik  
Gm26661  
Plxnb3  
NA  
Olfr49  
Gm10044  
St6galnac1  
Gm7682  
Ocm  
Cyp2w1  
NA  
Bsx  
Fabp6  
NA  
Lrrc17  
NA  
Dntt  
NA  
Rln3  
Krt32  
Gm9034  
4930533D04Rik  
4933424L21Rik  
Gm11670  
Gm13068  
Trcg1



Gm15921  
1700096J18Rik  
NA  
Gja1  
Gm17800  
Sfrp5  
Gm14206  
Gm16726  
NA  
Pnp  
Prelp  
Optc  
Gm3636  
Olfr750  
NA  
NA  
NA  
Klk1b5  
Hao  
Ptpv  
Golga7b  
Olfr539  
Faim2  
Gm12589  
Olfr1371  
Gm16183  
NA  
NA  
Eng

Gm13015  
Casp14  
Gm28382  
Gm13216  
Rbp7  
Gm7534  
Krt17  
Impg1  
Fgf22  
Rbpsuh-rs3  
1700012B09Rik  
Nhlrc4  
NA  
NA  
Kcnf1  
Wnt2b  
NA  
Hsd17b14  
NA  
Wnt4  
NA  
Sema7a  
Gm11668  
n-R5s74  
5430421N21Rik  
NA  
NA  
Gm12412  
Gm9568

NA  
Cyp2e1  
Hpse  
Cyp2d9  
Gm27217  
Spaca4  
Gm16120  
Gm12349  
Atp6v0d2  
Rptoros  
NA  
Ranbp3l  
Gjb3  
Catip  
NA  
4930535L15Rik  
Lfng  
Grin2c  
Gm13362  
NA  
Fam115e  
Angpt2  
Krt79  
4933402P03Rik  
Gp1bb  
Gm15318  
Pnma2  
Gm12163  
Kif26a

Gpr156  
Ffar1  
Krt42  
NA  
Wfdc1  
Sap30bpos  
Klk1b4  
Rnf183  
NA  
Efna3  
Sorcs2  
Ren1  
Elfn2  
Kcne3  
Dmpk  
Phgr1  
NA  
Edar  
Rnase12  
Lgals7  
Gm15381  
NA  
RP23-127L4.1  
Pnp2  
Osm  
Gm16175  
Pitpnm3  
Gm14198  
NA

Cfd  
NA  
RP24-372I24.3  
Avpr1b  
Rnf150  
NA  
NA  
Psmb11  
NA  
Prss32  
Krt86  
Pnmt  
Slc44a2  
Fstl4  
Tppp2  
Actl11  
Hsd3b2  
Sit1  
Gm14799  
NA  
NA  
Gm26600  
L1cam  
Gm20530  
Vstm2l  
Gm6166  
Gm11739  
Gm18970  
3110053B16Rik

NA  
Lamb3  
Gm13055  
Plch2  
Ston1  
4933426K07Rik  
Gm26568  
Ttll6  
Adcyap1r1  
Gm16194  
Gpr37l1  
Pnmal1  
Aspg  
NA  
NA  
Sec1  
Gm26761  
1700023L04Rik  
Krt4  
Stx1b  
Myt1l  
Llph-ps1  
Cacna1a  
NA  
Bfsp1  
Irx4  
Krt83  
Dchs1  
Gm5405

Cemip  
Foxn1  
Nmur1  
RP24-272N10.4  
NA  
NA  
NA  
Oprd1  
Gm12312  
4833413E03Rik  
NA  
NA  
Ermap  
NA  
Zp3  
Adamts16  
4921536K21Rik  
Paqr5  
Zfp831  
Mapk8ip2  
Hr  
Hba-a1  
Best4-ps  
Map6  
Fabp3  
Smpd3  
1700011A15Rik  
NA  
Dclk2

Gm10109

NA

Lgals12

Gm11978

Krt35

Gm17322

Zfp541

Neurod2

Fkbp10

Gm6361

Gm24149

RP23-211F21.3

5-Sep

NA

Gm136

Th

Tcf23

Eras

Gm12397

Gm15998

B4galnt4

NA

Foxp3

Fgfbp1

Prkag2os2

NA

Rapgef1

4933434M16Rik

Gm15495



Clic3  
Ntn4  
Kctd17  
NA  
1600015I10Rik  
Gm498  
Fam83e  
NA  
Hrh3  
NA  
Pla2g10os  
Mroh4  
Mir1983  
Gpr162  
Dpysl5  
Gm18859  
Gm26888  
Serpinf1  
9430041J12Rik  
Pthlh  
Pdgfrb  
Col17a1  
NA  
Scn2b  
Gm8213  
Gm26849  
Gm15707  
NA  
Disp2

Gm26728  
Gm16287  
Mir203  
NA  
NA  
Gm8810  
Crispld2  
Prkag3  
Zp2  
Slc16a8  
Gm11766  
Spata20  
Orai2  
NA  
Cyp11a1  
Fam71e2  
Gm6086  
Gm26647  
Afap1l2  
Xpnpep2  
Cpsf4l  
Hrasls5  
Mir181c  
Gm10478  
Kif12  
Gm11789  
Acss1  
Kcnn4  
Gm5353

4731419I09Rik

Foxh1

Elane

Wnt6

Plxdc1

Prss39

Slc6a7

Myl7

Gm8618

Cd248

Armc12

Krt7

Tcap

Lpcat2

Spon2

Hsd3b3

Slfn14

Gm12308

Rab44

Gm11723

RP24-443M8.1

Gm15915

Acap1

Grm4

Arhgef4

NA

Gm8281

Trp73

Slc28a3

1700128E19Rik

Krt36

Celf5

Dsc3

Gm10702

Gm11694

Krt13

Cdx1

Krt78

Gm8062

NA

Gm13645

Cyp4a32

Cd4

Trim46

Rragd

Gpr132

Arg1

Gm14299

Gm19557

Mylk2

Sh3rf2

NA

Ctsw

NA

Slc4a1

Hsd11b2

NA

Wnk2

Dnah8  
NA  
Gm16275  
Gna15  
Ambp  
Gm13250  
Wee2  
Lrrc75aos1  
NA  
Il17f  
Aoc1  
Fam183b  
Pmp22  
Ankrd35  
Rcn3  
Capn13  
Ascl2  
Gm26812  
Stmnd1  
Cox4i2  
Gm2a  
Plb1  
Fam178b  
Atp6v1b1  
Efna4  
Atp1a2  
Gm5815  
Gm20694  
Gm15947

Alpl2  
Baiap2l2  
Gm5633  
Arhgap27os3  
RP23-448H3.2  
Fgf1  
Gm10629  
Sdr16c5  
B230344G16Rik  
Kcnh8  
Gm830  
4930421P07Rik  
Gm15770  
Fam151a  
Spem1  
Dusp18  
Il27ra  
NA  
Slc27a6  
Gm13066  
G430095P16Rik  
Hoxa1  
Myh3  
Stac  
NA  
Gm11471  
Gm1123  
Efcab1  
Ramp3

Aldh3b2  
Phldb1  
Mir6352  
Frrs1l  
Gm933  
Slc17a2  
NA  
Gipr  
Gm12618  
1700097N02Rik  
Tead2  
Lypd1  
Gm17197  
Nid2  
A430105I19Rik  
Gm13074  
Fancd2os  
Miat  
NA  
Chst2  
Snx31  
Capn11  
Slc9c1  
C5ar1  
Nxf7  
Dok7  
NA  
Arx  
Apobec2

Tmem151b  
NA  
Fam129b  
Ppfibp2  
5730419F03Rik  
4932431P20Rik  
Rusc2  
NA  
E130215H24Rik  
Prap1  
Gm12678  
Adcy1  
Gas7  
Npb  
Gm17111  
Lrrc23  
Hemgn  
Vwa2  
Oxct2b  
Nanos3  
Nrl  
Mnx1  
Mycn  
NA  
NA  
NA  
Gm19461  
Trp53i11  
P2rx6



Krt80  
Gm11951  
Il12rb1  
Vstm5  
NA  
Myo1a  
Jsrp1  
Lrrn4  
Tmem145  
Apbb1  
2500002B13Rik  
S1pr5  
Gm8292  
NA  
Ogdhl  
Avp  
RP24-372I24.2  
Mr1  
RP24-147K15.1  
Gm12860  
Tmem117  
Ccin  
Trpv2  
Camkv  
Nqo1  
Gm14225  
1700108N11Rik  
Fstl1  
RP23-44D10.1

Pom121l2  
F12  
NA  
2010109I03Rik  
Nmnat2  
NA  
Gm27228  
A230087F16Rik  
Olfr221  
Hcn4  
Gm29643  
Krt31  
Ankdd1b  
Cyp2s1  
Kremen2  
Rad21l  
Scamp5  
BC051537  
Mast1  
Mfrp  
Fam83c  
9930038B18Rik  
Bex1  
Pglyrp1  
Ggt6  
Scgn  
Cyp2d41-ps  
NA  
Myo1h

Ces1b  
Tbx10  
1700001K19Rik  
Gm11949  
E130218I03Rik  
NA  
Car4  
Ap3b2  
Cdcp2  
Notch3  
Tlr6  
Pax4  
9530053A07Rik  
5830432E09Rik  
Trex2  
NA  
Tnfrsf25  
NA  
Ankfn1  
Gm16104  
Wfdc3  
A830073O21Rik  
Gm14162  
Pde4c  
Col2a1  
NA  
Edn3  
Alms1-ps1  
Prss47

Muc20  
Mpp3  
Vwf  
Gm14549  
Pkdrej  
Gm15569  
Crlf1  
Cfap45  
Gm13750  
Mcoln2  
Gm28192  
Clip3  
Slc2a6  
NA  
Bmp8b  
NA  
Palm  
Snph  
Gm12494  
Gpr97  
Il17re  
Ldb3  
Rassf5  
4930407110Rik  
Snai2  
Ccnd1  
Plcd1  
Nrap  
Ccl25

4732414G09Rik  
Tspan15  
Slc34a3  
Nalcn  
Sema3g  
BC024139  
Pcyt1b  
Gm973  
Gm14401  
Gipc3  
Gm7290  
Rprml  
Efna2  
Gm17324  
Rfx6  
Cd101  
Celf3  
9530085P06Rik  
Gng4  
Rtn2  
Ppp1r14a  
Rasgef1a  
Ccdc108  
Vash1  
Dnah11  
Arhgef15  
Mapt  
1700086L19Rik  
Tnnc1

Nwd1  
1700054A03Rik  
Myt1  
Gm15585  
Gm20421  
Gm29367  
Abcc8  
RP23-366M16.1  
Gm26602  
Gpr50  
Mmel1  
Tsga10ip  
Phox2a  
Capn8  
Gm3468  
Hrc  
Btbd18  
Gm12630  
A930009A15Rik  
Lppr3  
RP23-81K14.2  
NA  
Grin1  
Spata31d1d  
Hes2  
Caskin1  
Insm1  
Cldn15  
Vmn1r188

Fbxo2  
NA  
Gprc5b  
Gm13412  
Fmn1  
Ppm1n  
Gm21989  
Gm26642  
Rcor2  
8430408G22Rik  
Palm3  
Pcolce  
Hpdl  
Slc2a13  
Ptafr  
NA  
F730311O21Rik  
NA  
Ppp1r27  
NA  
Gm26751  
Fbln2  
NA  
Foxj1  
Lmx1b  
NA  
Nbl1  
Car5a  
Egflam

Gpr152  
Krt15  
1500009L16Rik  
Hmha1  
NA  
Tppp  
A230083G16Rik  
Mapk15  
Gm28626  
NA  
Tssk2  
AI427809  
NA  
Fam71a  
NA  
Gm10435  
Pde6a  
Olfm4  
D430018E03Rik  
Tldc2  
Myh7b  
Tssk1  
Glipr2  
Slc2a4  
4933405L10Rik  
Npas4  
Gltpd2  
Fscn2  
Zfp125



Akp-ps1  
NA  
Hcn2  
NA  
Mst1r  
Gm15846  
Tmc3  
Cacnb3  
2010001K21Rik  
Aqp1  
Mir200b  
RP24-423J19.1  
Mospd4  
Tnxb  
Vwa5b2  
Kcnt1  
Hs6st2  
Ptpro  
RP23-169H13.6  
Cbs  
1700003D09Rik  
Neurog3  
Plcd4  
Gm1043  
Chrne  
NA  
Hk1os  
Wipf1  
Gm13387

Gm4969  
NA  
Gm14017  
Lrrc25  
Gm16198  
Scube1  
Tubb3  
NA  
Tekt5  
Lynx1  
Gjd3  
Fam132b  
1110028F18Rik  
Sqrnl  
Gm11620  
NA  
Fam213b  
Slc25a41  
Ano1  
Pi16  
Zfp575  
Gm15460  
Cdk5r2  
Dmkn  
Tas1r1  
Dner  
Gfra3  
Gm14508  
2200002D01Rik

Ephb3  
Ppp4r4  
A730020M07Rik  
Mycl  
NA  
Enpp7  
Sapcd1  
G0s2  
Sall2  
Sox21  
Adamts13  
Tomt  
Ubxn10  
Gm21885  
Slc16a5  
Shbg  
Acss2  
Sdc3  
C330022C24Rik  
NA  
Tst  
NA  
Mfng  
NA  
Tnfrsf14  
Gprin1  
Hipk4  
Tppp3  
Serpina9

Pcdh8  
Ido1  
Apc2  
Ccdc63  
Tmem44  
Gm11821

4-Mar

NA  
Prtn3  
Fev  
Snx22  
Perm1  
Mst1  
Rbm46  
Arhgap27os1  
Fzd3  
Vwa3b  
Cited4  
Gm13523  
Slc45a3  
S100a6  
Gm2830  
Ctrb1  
Sult2b1  
Sdk2  
Sarm1  
4933423P22Rik  
Gm19345  
NA

Gm8941  
NA  
Vsig8  
Hes5  
Sphk1  
Scrt1  
Adipoq  
Cd97  
Lipt2  
NA  
Spire2  
NA  
2310034G01Rik  
RP24-531A1.1  
Zg16  
Gm12402  
NA  
Rnf165  
Gm8801  
Tmem210  
Hspg2  
Myo1g  
Rsph1  
2410080I02Rik  
Gm11517  
Fcgbp  
Chst15  
Notch4  
Bcas1

Dusp27  
RP23-256D19.3  
Gm12592  
1700122O11Rik  
NA  
Gper1  
RP23-456B9.23  
Slc29a4  
Gsdma2  
Tff3  
Rundc3a  
Rimbp2  
Timp2  
Cfap70  
Pex5l  
Hist1h1t  
Tlx2  
Epdr1  
Gm12236  
Rsph9  
Unc80  
Kirrel2  
Gast  
1700055N04Rik  
Grin1os  
1700014D04Rik  
Camk1d  
Frem2  
NA

H2-Pb  
Pnpla1  
Eda2r  
Efcab8  
Gm13448  
Chrm1  
Jakmip1  
Kcnk16  
Myh11  
Cacna1b  
Mmp19  
A730036I17Rik  
Cnga4  
Epn3  
Ckm  
Bace2  
Ttbk1  
Baiap3  
NA  
4930432K21Rik  
Itih5  
BC048546  
NA  
Amotl1  
Fxyd6  
Atp2b4  
4933433C11Rik  
Tmem182  
Gm15718

BC048609  
Syng4  
Gm15972  
St6galnac4  
Lmx1a  
NA  
Cpne7  
Stkld1  
NA  
NA  
NA  
Sox11  
1700018B08Rik  
Slc12a3  
DII4  
NA  
Gck  
Gm29590  
Ddo  
Hapln3  
Abhd11os  
NA  
NA  
Matn4  
Noxo1  
Gm10284  
Dbn1  
Limch1  
Tbkbp1



Nkpd1  
Map1b  
Gm16343  
Plat  
Rbm24  
Cldn23  
NA  
Dgka  
Lyve1  
Rpl3l  
Gm14207  
Aim2  
RP23-398K14.4  
Bai1  
D630003M21Rik  
Cd164l2  
NA  
Gm11615  
NA  
5830416P10Rik  
Gm14387  
Olig1  
Axin2  
Scn3a  
Kcnb2  
Rab37  
Oxct2a  
Slc39a2  
E230001N04Rik

NA  
Ryr1  
Def6  
Rpsa-ps12  
Scml4  
Trpa1  
Gm12424  
Mapk13  
Lyl1  
Kcnh3  
Cd79b  
Vgf  
Gsn  
Phlda3  
Dhh  
Pak3  
Rhof  
Pspn  
Ghrl  
Ppp1r1b  
Trim17  
Jdp2  
Syng1  
Chgb  
Ntrk2  
9330171B17Rik  
NA  
Obscn  
Gm11788

Mslnl  
Sema4c  
Clcn2  
Pgc  
Gm29290  
Gm3336  
Chst4  
Isl1  
Cplx2  
Syng3  
Gm20748  
1700001L05Rik  
Adam8  
A630014C17Rik  
Cndp1  
2810408A11Rik  
Neurod1  
Sphkap  
RP23-132N23.22  
Rnf144b  
Nfe2l3  
Usp35  
NA  
Rpl31-ps6  
2610028H24Rik  
Grm2  
Nkx2-2  
Lcp1  
Fer1l6

D030047H15Rik

Tmem235

Fras1

Irs3

NA

Kcnk10

Wnt9b

Dnaaf1

Fstl3

Adam15

NA

NA

Cacna1h

Afp

NA

Gm11735

Pkp1

Pcdh10

Gm28884

Gdpd5

Scml2

Mgat3

Trim10

Rec8

Kcnq1

NA

Bend5

Pla2g4a

Gm1631

Exoc3l2  
Cilp2  
Fabp5  
Cabyr  
Pla2g3  
Nynrin  
Acta1  
Gdap1l1  
Sh3pxd2a  
Hspa12a  
Il21r  
Klhdc7b  
NA  
Fbxo24  
1700019B03Rik  
Celsr1  
Rps24-ps3  
Nim1k  
Cdk14  
Slc29a1  
Ggn  
Gm26739  
NA  
Limk2  
Nos2  
NA  
BC018473  
Gm11489  
1810053B23Rik

Gm10080  
Al118078  
Gm27389  
Bsn  
Oit1  
Sesn3  
Abcg1  
Scg2  
A330009N23Rik  
Tnnc2  
Syt13  
Cryba2  
NA  
Tstd1  
Bdh1  
Gm6283  
Gpr83  
Arhgap9  
Gm10575  
Clstn1  
NA  
Arhgef10  
RP23-160G19.9  
Ern2  
Klhdc7a  
Gpc2  
Gm11724  
Slc51a  
Gpr35

Atp6v0e2  
Duox1  
RP24-144H23.5  
Ecscr  
Gm12470  
Acer1  
NA  
Tinagl1  
Epha4  
Gm26541  
Ltbp4  
Paqr4  
Atcayos  
Gm6263  
Nptx2  
RP23-246H16.1  
RP23-128G10.6  
Nlrp6  
NA  
Prr19  
Gm6305  
9530036O11Rik  
Nrarp  
Gm10676  
Ptpn13  
Flnc  
Tmie  
RP23-320P13.1  
Clstn3

Uox  
NA  
Metrnl  
Foxa2  
Gm4978  
Gm4152  
Mycbpap  
Capn9  
Aldh1b1  
Dzip1  
Tmprss9  
Chst8  
Vim  
Rpgrip1  
Cerk  
Ncs1  
Gm15697  
Gm16863  
Gm27599  
Chadl  
Hunk  
Mesp2  
1700019D03Rik  
Kcnn1  
Lgals4  
Cbfa2t3  
Suox  
Gm15912  
Gm15638



Scg3  
RP23-27L18.4  
Anks6  
Bmp3  
Fsd1l  
Pla2g10  
Adprhl1  
Rpl22-ps1  
Shisa7  
Irak1bp1  
Gm26532  
Atp8b3  
Gm17552  
Nbeal2  
Lrrc8e  
Gm17040  
4930527J03Rik  
Dapk1  
Csad  
Extl1  
NA  
Agap2  
Muc1  
Mmp21  
Gm12704  
Dennd1c  
Slc25a29  
Ggt7  
Gm5069

Lrat  
Iffo2  
Lrp1  
Bcar1  
Mex3b  
Pip5kl1  
Cntnap1  
Mex3a  
Irf5  
Slc1a3  
Arhgap39  
Atp2a1  
Ppic  
Plk5  
Slc25a35  
Sdr9c7  
Syt11  
Fxyd3  
NA  
Sfn  
Rgs7bp  
RP23-415E17.1  
Slc38a8  
Gm28856  
Prph  
C1qtnf6  
Pxdn  
C2cd4c  
Dct

Dock3  
Ttll10  
Fosl1  
Ooep  
Atg9b  
Slc7a7  
Cux2  
Rhoq  
Gm5464  
Nacad  
2010107G12Rik  
Ckap4  
NA  
Mcf2l  
S100a16  
Gas6  
Gm12260  
Zc3h12c  
Lrp11  
Slc17a7  
NA  
NA  
Sned1  
Rangrf  
Slc5a10  
Plekhg5  
Syna  
Ltbp2  
RP24-64D24.3

Ephb2  
Nrip3  
Selenbp2  
Man1c1  
B930095G15Rik  
Scx  
Dennd2a  
Gnat2  
NA  
RP23-118E21.11  
Shisa2  
Leng9  
Slc35e4  
Gm12799  
Styk1  
Cant1  
RP23-407E2.27  
Rpp25  
Slc13a2  
Sv2c  
Dbil5  
Celsr3  
Fhad1  
Cdk6  
Pafah1b1-ps1  
Gm26707  
D130051D11Rik  
NA  
Ushbp1

NA  
Ybx2  
Pax8  
NA  
Fastkd5  
S100a14  
Car15  
Lhfpl2  
Pllp  
Mettl7b  
NA  
Ttl13  
Pdk2  
Mpst  
RP23-211F21.1  
Shc2  
Rnf32  
Misp  
Gcg  
Add3  
Gm10516  
Cobl  
Bbs1  
Vasp  
Necab3  
Cuedc1  
Cd9  
NA  
BC067074

Pappa2  
A530013C23Rik  
4930520004Rik  
Ankrd6  
Rap1gap  
Abi3  
Dio1  
Hhip12  
Cracr2a  
Klk1  
NA  
Dclk3  
Tsnaxip1  
1700001O22Rik  
Fam20c  
Ptpu  
NA  
Cisd3  
NA  
NA  
NA  
Gm11695  
Lzts1  
NA  
Arhgap27  
Rasgrp2  
Ier5l  
4930548H24Rik  
Lmtk3

RP23-280F6.6  
Qrich2  
Cyp4f40  
Dagla  
NA  
RP23-160G19.10  
BC049762  
Gale  
Rbm20  
Dact3  
Msantd3  
9030622O22Rik  
Prx  
NA  
NA  
1700088E04Rik  
Fam174b  
Colec11  
Dock6  
Gckr  
1700072G22Rik  
Fbxl18  
Agpat4  
Gfap  
Kctd21  
Paqr6  
Ky  
Gramd2  
Ptplad2

Grip2  
Myb  
Gm11525  
Msi1  
Spata33  
Tceal8  
Grin2d  
Chga  
Pmel  
Ptprcap  
Kcnh6  
Mybpc2  
Gm26571  
1700066B19Rik  
Pde1c  
Trim36  
Rnf208  
NA  
Als2cr12  
Creb3l1  
Amn  
Kiss1r  
5330417C22Rik  
RP23-124B2.3  
Ebf4  
4933439K11Rik  
Ghrhr  
NA  
Cck



RP23-371A16.2  
Ces1d  
Gm26858  
Ehd2  
Clmn  
Duox2  
Syk  
Lbp  
Was  
Nudt15  
Snai3  
Sh2d4a  
Gm12854  
F630040K05Rik  
Slc39a5  
9430025C20Rik  
Murc  
P2ry6  
Tspo2  
E230015B07Rik  
Zfp532  
Actl10  
Gm28720  
Gm16477  
4631405K08Rik  
Gpr55  
Gng7  
Ckmt1  
RP23-101N20.9

Slc1a1  
Dlg4  
Cpe  
Hist2h2bb  
Sycp2l  
Mir200a  
Comp  
RP23-1D15.3  
Robo3  
Slc26a1  
Bex2  
Il17c  
Cnn2  
Arl14  
Srl  
BC068157  
Itgb4  
Gm28386  
Parm1  
2410019O14Rik  
NA  
Gm12307  
Soga1  
Tspan33  
Trim47  
Ltf  
Cnnm4  
Apcdd1  
Tpsg1

D430040D24Rik

Pld4

NA

Hsd17b2

NA

Al854703

Ppp1r3e

Gm2420

Farp1

Ttc16

Tdrd12

NA

Rgs9

Gm10010

Gm13067

Klf1

Ass1

Pxylp1

Lama4

Lrrc31

Gm17029

Skida1

Gm26664

Cracr2b

Arfgap3

Adcy10

Fbp1

4932418E24Rik

Mettl7a1

NA  
Tmeff1  
Ankrd34a  
Mfsd4  
Daf2  
Nlrp1b  
Grtp1  
Gm14418  
NA  
Hes6  
NA  
Stk36  
Smoc2  
Gm15444  
Igfals  
Fam57a  
Gm13648  
Samd12  
Gm7860  
B3gnt8  
AW011738  
Trim69  
2010300C02Rik  
Snai1  
Adamts17  
Fhl2  
NA  
Tcam1  
Rpl31-ps10

D230017M19Rik  
Gpr153  
Gsto2  
Vpreb3  
RP24-566B6.4  
Fermt3  
Galnt12  
Arc  
BC021767  
Tiam1  
Slc4a11  
NA  
Unc13a  
RP23-282M20.1  
Gm10643  
NA  
Nckap5l  
NA  
Arrb1  
Kcnq4  
Gm10517  
Slc5a12  
NA  
Id1  
Cmtm3  
Zfp647  
Rsg1  
Gm15842  
Syn2

RP24-388P13.2  
Gm15743  
Gm26782  
Dnajc28  
Dapk2  
Dnah9  
2210406O10Rik  
NA  
1700003E16Rik  
NA  
Arhgap27os2  
Zfp92  
Relb  
Tdrd1  
Epb4.1l4b  
Zfp454  
Catsperd  
Gprc5a  
2310014L17Rik  
Hnf4a  
NA  
Gm20518  
Rasd2  
Pcdh17  
NA  
Cyp27a1  
Phyhd1  
Morn4  
Peg3

4833422M21Rik

Tbxa2r

NA

Cdnf

NA

Mfi2

Pclo

Pde8b

Gm26702

Abat

Spo11

NA

Cnga1

NA

Aire

Apom

Tox3

A630095N17Rik

Scarb2

Mypopos

BC048644

Zan

Gm12944

Gm20033

Stag3

Gpr56

D830044I16Rik

Sptbn2

Psd4

Slfn4  
Fut4  
Rap1gap2  
Pax6  
Mir194-2  
Ptges3l  
Smim6  
Fam115c  
Piwil2  
Lpxn  
Fgfbp3  
Tiam2  
Akna  
Rasa4  
Sec22c  
Emp3  
B930041F14Rik  
Faim3  
Gm26887  
Ddn  
Fank1  
Fbxl16  
Gm8355  
Mir3109  
NA  
Mgmt  
Mrgpre  
Wbscr25  
Nuak1



Slfn1  
Pmepa1os  
Dli1  
Tmem81  
Dgcr2  
Ttyh3  
Dsp  
RP24-366E11.2  
Rbm38  
Ptger1  
NA  
RP23-303M15.7  
Adcy4  
Gm11263  
RP23-469D21.2  
Mafa  
Fam46b  
Rab15  
Gm9887  
Als2cl  
Aqp4  
Tspan1  
Cbx2  
Creb3l4  
4921507P07Rik  
Atoh8  
Zbed5  
Grasp  
Gls2

Slco4a1  
Cep83os  
Hepacam2  
Kif27  
Ampd1  
Clec11a  
Gm14322  
Tln2  
Amh  
Nhlrc1  
Gm14403  
Dnah7b  
Vash2  
Tenc1  
Gm7420  
Tprn  
1520401A03Rik  
L3mbtl1  
Epb4.2  
Syp  
Iqck  
Prex1  
Adrbk2  
Slc7a2  
NA  
Iffo1  
Myh14  
Frat2  
Cap2

Ms4a8a  
Gm20457  
NA  
Clcn1  
Ssc5d  
Rwdd2a  
Kctd12b  
NA  
Megf6  
Tgfb1  
Esr1  
Mcam  
Tmem63a  
Glt1d1  
Pmm1  
Gjc2  
Ppp1r9b  
Slc23a3  
Cbx7  
Wnt9a  
Asrgl1  
Ret  
NA  
Nefm  
PCDHGB6  
Jup  
Hyal1  
Gm9493  
Ctnnb2nl

Fgf18  
Ivd  
RP23-21P10.1  
NA  
Gm14023  
Smtnl2  
Capsl  
Il11  
Abcg4  
Gm16433  
Ffar2  
C330021F23Rik  
Nupr1l  
Papln  
Fam109a  
Pfkml  
NA  
Dcst1  
Adra2a  
Srd5a1  
Mb21d1  
Mageh1  
Epb4.1l4a  
Klf3  
Sowaha  
Adck3  
5330439K02Rik  
Prickle1  
Mkrnl

Notch1  
Tnfrsf811  
Gm7027  
Mlxip  
NA  
Tph1  
Dand5  
2510009E07Rik  
Trim40  
Gip  
NA  
Kcnk6  
Gm15612  
NA  
Mmp28  
6430573F11Rik  
Frmd8os  
NA  
Tchh  
Pirt  
Man1b1  
Spdef  
Pla2g4b  
Izumo4  
NA  
Abcb6  
Mreg  
Cd247  
Gpr179

Otud1  
Urah  
Ovca2  
Evpl  
Fam189b  
Gnao1  
NA  
NA  
Gm8806  
Elf3  
Fgfr2  
Ovol1  
P2rx3  
Nr1i3  
Bcl2  
Tspear  
Map3k6  
Ablim1  
Dab2ip  
Slc37a1  
Abcc3  
Map3k15  
Tmem231  
Zswim3  
Nfix  
Gata5  
Gramd4  
Tor3a  
Ampd3

Fam115a  
Pdia5  
Tmem107  
Rab3d  
9430060I03Rik  
NA  
NA  
Bricd5  
Cpt1c  
Sash1  
Hid1  
NA  
Mus81  
Runx1t1

9-Mar

Acot11  
Usp2  
Gm15672  
Slc20a1  
Mylk  
Gm10614  
Lrrc8a  
Rtn4rl1  
Eml1  
Oscp1  
Gm9917  
Lrrn4cl  
Gm10812  
Rin1

Lrrc73  
Gm28496  
Cd177  
Ric3  
Gxylt2  
Ccdc141  
Gm13443  
Thbs3  
Ccb1  
Psm5  
Mcc  
Jag1  
Ptgr1  
Phyhip  
Fam71e1  
Kazald1  
Pim3  
Kif13a  
Bmp8a  
Lrrc51  
NA  
2610318N02Rik  
Gngt2  
Wnt11  
9130208D14Rik  
Rab3c  
NA  
Tcf3  
Plekhh3



Gm10501  
Tfap4  
Gm4204  
Spag8  
NA  
Kcnh2  
Ptpns  
NA  
Tac1  
Hdac11  
Abcc4  
Lgals9  
RP23-406J20.2  
Myc  
Gm29358  
Cebpb  
Uap111  
Tssk6  
Trim15  
Mfsd6l  
Parp1  
Hectd3  
Maats1  
Gm16576  
NA  
Atoh1  
Fam129c  
Krt8  
Usp43

Anxa7  
2900089D17Rik  
Dusp1  
Vsig10  
1700029J07Rik  
Lag3  
Rbbp8nl  
Gm15510  
Gm28512  
Capn5  
Ikbke  
Smim24  
9530027J09Rik  
Plbd1  
Impdh2  
Gm26710  
Rasd1  
B130034C11Rik  
Lbhd1  
Mgst2  
Camk2n2  
Rarg  
Tns4  
Igsf9b  
Tnfsf13os  
BC051142  
Psd  
Pgm2l1  
Tmem132a

Cxxc4  
Ift27  
Zak  
Ttc38  
Arhgdig  
Rnf26  
Guca2a  
Foxa3  
Ubxn11  
NA  
Gm5879  
Gpr3  
Lgr5  
Epb4.1l2  
Tmc8  
Txndc16  
4921531C22Rik  
Gadd45b  
NA  
Uggt2  
Pyroxd2  
Mbp  
Mgst3  
4930583K01Rik  
Slc22a4  
Poli  
Rxra  
Sema3b  
Dolpp1

9930012K11Rik  
4930427A07Rik  
Crip1  
E2f2  
Slfn9  
Numb1  
Ephx1  
Kcnk1  
5730559C18Rik  
Mmp23  
Gstm2  
Fzd5  
Adrb2  
Gm11545  
Prr7  
Gpd1l  
2310040G24Rik  
Nod1  
Nup210  
Al467606  
Klf13  
Lrrc26  
Vopp1  
Tcf7  
Rtkn2  
Gm12352  
Mapk3  
Gm15832  
C330011M18Rik

A130051J06Rik

NA

Erich2

Acy1

Ajuba

Tcea3

Dok3

Ppl

C2cd4b

Zdhhc14

Csrnp2

Gm9530

Mex3d

RP23-355E19.1

Tigd3

Plekhg1

Smarcd2

Duoxa2

Ttc39c

Prox1

Fry

Sema3f

Xrcc5

Amigo3

Plxnb1

Sdc1

Rara

Acvr1b

Ovgp1

Pitpnc1  
6430548M08Rik  
Hivep3  
Fam65a  
Tet1  
Kbtbd11  
Lpar5  
Unc5b  
Dyrk3  
Nmral1  
Gm16133  
Pygb  
Clca6  
Hpd  
Gm15210  
Gm26615  
Wdr31  
Mapkapk3  
Cntd1  
Camsap2  
Pdk1  
Hexim2  
B3gnt5  
Rnf157  
Glb1l  
Ppp1r14d  
Cpt2  
Marveld1  
Egfl8

Utp14a  
Deptor  
4930524O07Rik  
Chrb2  
Gtf2ird1  
Sipa1l2  
4933407K13Rik  
Stard13  
Pard6g  
Gk5  
Serpib6a  
Tmem177  
Gm10110  
Gm2223  
Dnaaf2  
Rab3a  
Arhgap24  
Dfna5  
Unc5a  
9130221H12Rik  
Zbtb38  
Galnt6  
Pdlim2  
Pmepa1  
Gid4  
Mvp  
Mir192  
Sox13  
Vangl1

Cyp4f15  
Plgrkt  
Traf4  
Tfdp2  
Nicn1  
Mcm10  
Kctd10  
Awat2  
Ppap2c  
9530082P21Rik  
Kdm2b  
Osbp10  
Map3k12  
Myo5c  
Prodh  
Gdpd3  
Il4ra  
NA  
Gzmm  
Cdt1  
Gm10269  
Ccdc96  
Cbx6  
Steap3  
Ncald  
Fbp2  
Lmna  
Nr2e3  
Plaur



Atp2c2  
Iqsec1  
Marcks1  
Hs6st1  
Glce  
Golm1  
1700067K01Rik  
Amdhd2  
Vwa7  
Gltscr2  
2810454H06Rik  
Gm11223  
Gm5428  
Tfrc  
Hyal3  
Gm10036  
Slc6a6  
Plekhh1  
Gm6288  
Slc5a5  
Gm15500  
Tnnt2  
Acsm3  
Lrch4  
Grb7  
Fhdc1  
NA  
Bcl7a  
Tmem218

Zfp41  
Syt7  
Ptgfrn  
Camk2n1  
Ccdc158  
Gpr112  
NA  
Mgat4a  
Lrrc20  
Angel1  
NA  
Aoc2  
Pomk  
Pck2  
Rem2  
St18  
Nfya  
Clca4  
Spef1  
Tle3  
Slc5a6  
Tmem63b  
Alkbh4  
Fam63a  
Irgm1  
Ppp1r13l  
Ttll7  
Ahnak  
RP23-294l17.4

Irf8  
Btbd19  
Coro2a  
Efnb3  
Cebpa  
Rpl28-ps1  
RP23-102K8.1  
4931428F04Rik  
Gpr157  
NA  
Nrep  
Cdca7  
Hspa4l  
NA  
Zfp46  
Chsy1  
Aph1b  
1700001P01Rik  
Fktn  
1600002K03Rik  
Gch1  
RP23-393C3.4  
Sox4  
Pdp2  
Idh2  
Fam173b  
Lrp5  
Gm11696  
Ifi30

Ypel1  
BC021891  
Map4k1  
Efhb  
Zfp12  
Bbs2  
Olfml2a  
E2f8  
Smo  
Map1a  
Ctsh  
Sapcd2  
Slc25a47  
Enpep  
Nck2  
Mdm1  
Rab32  
A930024N18Rik  
1110035H17Rik  
Itpkb  
RP24-201C14.12  
Cluap1  
Proser2  
Phkg1  
Dag1  
Tpbg  
Sdc4  
Rnf39  
Arrdc2

Pgbd1  
Oxa1l  
Paox  
Aacs  
NA  
Erb2  
6720489N17Rik  
Unc5cl  
Itga3  
Ppfia3  
Bin1  
Lrrc75aos2  
Pdp1  
Nt5c  
Cgn  
Prr15l  
Nfatc2  
Zfp558  
Sulf2  
Wars  
Pygm  
Rab27b  
Cela1  
Ptrh1  
Tmem167b  
Slc1a5  
Nek4  
Nat9  
Rpl4

Slc6a19  
5031439G07Rik  
Agap1  
Nfic  
Ovol2  
Eif4ebp2  
Ptk2b  
Mtrr  
Tmprss4  
Slc22a23  
Rgmb  
Fzd2  
Hk1  
Dcaf15  
Tubb2b  
Hic1  
Kif23  
Ano7  
9130017K11Rik  
NA  
Nap111  
Ets1  
1700112E06Rik  
Bcl2l1  
Zfp36l2  
Adap1  
Nav2  
Dars2  
NA

Rpl3-ps1  
NA  
Prmt5  
Zfp113  
Eef2  
Entpd8  
Fpgs  
Sema4d  
1700011E24Rik  
Zdhhc1  
Abcc1  
Fam83b  
Xxylt1  
Spata13  
Xpc  
Lrrc16b  
Gse1  
Hexim1  
Cyp39a1  
Ephb4  
Zfp661  
Pla2g15  
Prss41  
Tmem98  
Itpka  
Gm9396  
Ms4a10  
Esy1  
Mesdc2

Rps15-ps2  
Fam107b  
H3f3aos  
Zscan20  
Tmem102  
Gal3st2  
Cdh1  
Fam83d  
Rcl1  
1700016G22Rik  
Atmin  
Krt18  
Taf1c  
Sh3bgrl2  
E330009J07Rik  
Hspa2  
Lrfn4  
Surf2  
B3gnt3  
Obfc1  
Ctnnbip1  
Tpst1  
Tmem260  
Panx1  
Anxa11  
lpo5  
Ap4m1  
Emilin1  
Eef2k



Tert  
Tmem8b  
Baiap2  
Wdr34  
Card10  
Igbp1  
Cklf  
Bcl2l13  
Dock9  
Sipa1l1  
4930523C07Rik  
Dclre1b  
Avpi1  
Mrps31  
Sphk2  
Dpp7  
Lrrc8b  
Rdh13  
NA  
Dok4  
Tpcn1  
Gm12918  
Gan  
Abhd14a  
Gm14420  
Adora1  
Colgalt1  
Mfge8  
Ctsc

Ftsj3  
Hps4  
Cage1  
Traf3  
Wdhd1  
Gna12  
Pard6a  
Slc7a5  
Hs1bp3  
Lgals3bp  
Chtf8  
Dnal4  
Ctxn1  
Tmc4  
Pars2  
Tcf20  
Carhsp1  
Eif4b  
Esrp2  
Scd2  
Rbm15b  
Ninl  
AW209491  
Pard6b  
Acap3  
NA  
Gm15941  
NA  
Casp7

Nek6  
Lipt1  
NA  
Nrtn  
Card6  
Cluh  
Ppt2  
Slc35c1  
Gm6548  
Mroh3  
Pxmp2  
Zfp87  
Arhgap42  
Dffb  
Itfg3  
Cnm3  
Gm8430  
Rtkn  
NA  
Mrpl24  
Pold3  
Cdc42ep1  
Fn3krp  
Polr2a  
Krt19  
Bcs1l  
Zfp317  
Pabpc1  
Cyba

Fam160a2  
Rbak  
Acpp  
Gpld1  
Mpzl2  
NA  
Mfsd12  
Oxsm  
Acad12  
Zfp473  
Ide  
Peo1  
Cask  
Maoa  
Eef1g  
Gm3362  
Trim65  
2310067B10Rik  
Hsp90ab1  
Mcm3  
Plekhm3  
Myh9  
Zbtb7b  
Plxna2  
Elp3  
Vezf1  
Pogk  
D730003I15Rik  
Tmtc4

NA  
Mki67  
Fam102a  
Gm16023  
Hpcal1  
Bet1l  
Asnsd1  
Rpsa  
Kctd15  
Gltf  
Kdm1b  
Mgme1  
Sh3bp4  
1110008L16Rik  
Tmem206  
NA  
Pttg1ip  
Slk  
Msh6  
Lamb2  
Sun1  
Unc119b  
Esrp1  
Pak4  
Msh2  
Eif2b1  
Zfp341  
Whrn  
Klhl23

Glo1  
Mknk2  
Poc1a  
Htatsf1  
Psen1  
Zscan22  
Zbtb7a  
Zc3h12d  
RP24-297J20.6  
Casp2  
Ankrd49  
NA  
Ears2  
Zfp239  
NA  
Endod1  
Zyx  
Cep19  
Rep15  
Lgals3  
Rpusd2  
Lmln  
Rnf149  
Rrp1b  
Tpmt  
Wdr78  
Msrb1  
Smarcc1  
Ethe1

Rab11fip1  
9930014A18Rik  
Cd3eap  
Casz1  
Naif1  
Polr2b  
Cdr2l  
Zc3h7b  
Lrrc49  
Dpysl2  
Rnf169  
Gtf3c4  
Nans  
Zfp93  
Hdgf  
Map3k9  
Apmmap  
Pdha1  
Napepld  
Vav3  
Plec  
Lig1  
Cand2  
Dnajb5  
Zswim1  
Mlh3  
Cdc42ep5  
Hspa8  
Lrp4

AK129341  
Atic  
Mob3a  
Foxk1  
Rnf122  
Sec14l1  
Ankrd13b  
Sort1  
Plekha6  
Abr  
Gm10275  
Bcl11b  
NA  
Hirip3  
Rnf219  
Mylip  
A230072E10Rik  
Gm15417  
Ano8  
Plcg2  
Kazn  
Rnaseh2a  
D1Ert622e  
Gm8979  
Repin1  
Map4k4  
Gm10335  
lds  
Ftsj2



Ddit3  
Cryl1  
Igsf8  
2810408M09Rik  
Nolc1  
Tmem216  
D030028A08Rik  
Gpsm1  
Noc2l  
Tex14  
Agrn  
Mybl1  
Zfp629  
Ttc39a

8-Sep

Mpv17l  
Asap2  
Ascc2  
Plekhg2  
Zfr2  
Plce1  
Tjp3  
Zfp180  
Aplp1  
Cmtm4  
Polr1b  
Stmn1  
Tctn1  
Cdc6

Cpsf3  
Igf2r  
Myom1  
Ndufaf7  
Prelid2  
Pag1  
Hn1  
Lsm11  
Sox9  
B4galt6  
1700113A16Rik  
A930011G23Rik  
NA  
Slc25a37  
Desi2  
Ppargc1b  
Trmt5  
Cenpv  
Foxp4  
Ctif  
Zc3h10  
Sf3b2  
Vps26b  
Ece1  
Acadsb  
Ctdspl  
Fgfr3  
NA  
NA

Add1  
Phf19  
Zfp704  
Dnaja3  
Car9  
Cenpf  
Dexi  
Rprd1b  
Dnph1  
Cdc42ep4  
Knop1  
Nphp1  
Rtcb  
Rpl18-ps2  
RP24-372I24.4  
Chchd5  
F2rl1  
Zfp94  
Zfp664  
Tubb2a  
Brpf3  
Ndrp2  
Limk1  
Serhl  
Mecom  
Ppip5k2  
Naa60  
B3galt4  
Ick

Cep78  
Rpap3  
Itpk1  
Abca2  
Vipas39  
Armc10  
Phax  
Polr2h  
Pik3c2b  
Mettl8  
Tk2  
Tlcd1  
Lgals2  
Grsf1  
TIGD5  
Fuk  
BC030867  
Ccar2  
Rsad1  
Serp1  
Itga6  
Zfp637  
Chmp4c  
Arhgap8  
Xrcc3  
Haus4  
Cep162  
E2f1  
Zbtb14

Dna2  
Gabbp2  
Ift122  
Eif2a  
Igf1r  
Zfyve27  
Zbtb45  
Usp22  
Hus1  
Wdr13  
Mecr  
Armc7  
Fam168b  
Rpl3  
Gpr110  
Capn10  
Uprt  
Sco1  
Slc25a42  
Airn  
Agtrap  
Dlg5  
Dnmt1  
Gltscr1l  
Plxnb2  
Pramef8  
Polr1e  
Klf10  
Qars

Snrnp200  
Gart  
D930015E06Rik  
Liph  
Vamp1  
Fam64a  
Mthfr  
Ybey  
2610015P09Rik  
Slc25a25  
Pabpc4  
Upf1  
Pde4dip  
Bend3  
Tmcc3  
D2Wsu81e  
Gm15879

11-Sep

Rpsa-ps10  
Fam98b  
Strip1  
Wdr25  
Trim45  
Tab1  
Zbtb8a  
Mtif3  
Gm15772  
Sh3bp2  
Slc29a3

Reep6  
Crocc  
Plekha5  
Mllt11  
Tmc6  
Gemin8  
Specc1  
Sypl2  
Wdr77  
Metrn  
Vkorc1l1  
Dbt  
Pdzd3  
Chdh  
Sh3bp1  
Sel1l3  
Prpf8  
Nono  
Tns3  
Cgnl1  
Cln6  
Klf16  
Itsn1  
Txnip  
Degs2  
Sorl1  
Agmat  
Crtap  
Tmem123

Cby1  
Mars2  
Acad10  
Pigp  
Nudt8  
Acvr2b  
C2cd2  
Tmem194  
Ctu1  
Id2  
Gm15427  
Ccng1  
Nuak2  
Klc4  
Magi3  
Nol6  
Champ1  
Kif21a  
Jmjd6  
Prkrir  
Slc35b4  
Paip2b  
E130317F20Rik  
Poll  
Nkrf  
Nr2f2  
Ago1  
Pusl1  
Fntb



Cad  
1190002N15Rik  
Ddx19b  
Lmnb2  
Rin2  
Engase  
Lym7  
Greb1  
Pigh  
Ralgds  
Arhgap1  
Nelfcd  
Naa40  
Exog  
Nrpb2  
Tsen54  
Chp1  
Srpb  
Ubr7  
Gm15545  
2700060E02Rik  
Acad8  
Stard10  
Rqcd1  
Pex26  
Ccdc3  
Tb12  
Mcmbp  
Gm340

Isg2012  
Grk6  
Hbegf  
Synj2  
Zfp266  
Ift140  
Tfpi  
Med18  
Mybbp1a  
Ccdc134  
Rps27a-ps2  
Inpp4a  
Accs  
Gm14305  
Ubn1  
Enkd1  
Wdr46  
Ankrd9  
Serp8  
Mrpl44  
Pitrm1  
Tmem57  
Sp1  
Smug1  
Klh21  
Phf7  
Akap7  
Mlx  
Zfp54

Tpx2  
Nt5c2  
Zscan29  
Mcm4  
Fads3  
Serinc2  
Ubtf  
Vmac  
Aktip  
Tfeb  
Wbp5  
Sik1  
Pctp  
Timp3  
Zfp358  
Adcy6  
Thop1  
Pip5k1c  
Ceacam1  
Nedd9  
1810011O10Rik  
Timm21  
Ergic1  
Lrig1  
Mettl13  
Numa1  
NA  
Mis12  
Trmt10b

Mcm2  
Slc39a3  
Zkscan17  
Nr3c1  
B3gnt1  
Ddx24  
Lbr  
Naip1  
Gm7964  
BC017158  
Src  
Prdx3  
Ddx19a  
Mettl1  
Poglut1  
Nol4l  
Opa3  
Oxct1  
Pdxk  
Zfp956  
Shf  
Smox  
Plcb3  
Iqgap1  
Gdf15  
Zfp652  
Mcm6  
Lyplal1  
Mdc1

Slain1  
N4bp2  
Qtrtd1  
Pcyox1  
Kank1  
Cox19  
Camsap1  
Pomt1  
Slc44a1  
Trim28  
Zbtb1  
2010107G23Rik  
Prkcz  
Smpd4  
Nif3l1  
Slc35e1  
Fam120a  
Mmp14  
Ccdc61  
Cnst  
Asb8  
Zbtb39  
Tars2  
Akt1  
Pknox1  
Vars2  
Zfp740  
C2cd3  
Ucp2

Taco1  
Arhgef39  
Ing1  
A430005L14Rik  
Ncapd2  
Arrdc1  
Wdr36  
Mccc2  
Ccdc64  
Rps6-ps4  
Pdzd8  
Gm14295  
Iqgap3  
Uhrf1  
Smyd2  
Kif20a  
Entpd6  
Ldb1  
Uck2  
Pde3b  
Prkar2a  
ErbB3  
Shroom3  
Cldn3  
Noa1  
Helq  
Cyb5rl  
Rrm1  
Arvcf

Coro1c  
Fam98c  
Nln  
Eps8l3  
Banp  
Wdr5  
Tcf4  
Abhd2  
Supt16  
Nlr1  
Lima1  
5830417110Rik  
Kars  
Wasf2  
Mansc1  
Gga2  
Spint1  
Bend7  
Fam110a  
Mib2  
Aagab  
Gstz1  
Zfp821  
Pfas  
Rnmtl1  
Msh5  
Gna13  
Clip2  
Eif3d

Bzw1  
Rpl5  
Thns1  
Pisd  
Tufm  
Hsd1  
0610009O20Rik  
Qtrt1  
Bivm  
Qpct1  
Gpa33  
Ssrp1  
Il17rc  
Txndc5  
Rps4x  
Tubgcp2  
Nlrc4  
Ppp1r14b  
2900026A02Rik  
Cit  
Cdca7l  
Smarcd1  
Gtf2h3  
Tut1  
Csrp2  
Amz2  
Ctdsp2  
Baz1b  
Shmt1



Eef1b2  
Tmem171  
Dnajb1  
Ints5  
Surf1  
Exo5  
Gna11  
Bri3bp  
Pprc1  
Gorasp1  
Wdr73  
Nadsyn1  
Klhl18  
Gtpbp3  
Mapre2  
Gclc  
Ehf  
Aen  
Slc26a2  
N4bp1  
Pank3  
Eya3  
Gdpgp1  
C1qbp  
Trp53  
Mical2  
Rgs3  
Iqsec2  
Pias4

Exosc10  
Mxi1  
Rab25  
Sh3pxd2b  
Mical3  
Paics  
Polr3gl  
Nop14  
Arhgap35  
Dck  
Tssc4  
Acot7  
Pla2g16  
Fam168a  
Ctnna1  
Wbp11  
Rpl7  
Larp1  
Fam65b  
Sf3a1  
Ccbl2  
Zfp64  
Ctdp1  
Deaf1  
Efhd2  
Lrpprc  
Zfp553  
Csnk1e  
Rad21

Iqce  
Ripk3  
Rhobtb2  
Atxn3  
Slc30a4  
1700017B05Rik  
Hmga1  
Cux1  
Wipi1  
Zfp146  
Oxnad1  
Setd8  
Ice1  
Nme4  
N4bp3  
Pidd1  
Dcaf4  
Emc8  
Nfe2l1  
Dvl2  
Ddx39  
Sema5a  
Brca2  
2810402E24Rik  
Gtf3c5  
Cdc5l  
Snrk  
Rpl28  
Gjb2

Tsen2  
R3hdm4  
Inafm1  
Chtf18  
Mrps5

6-Sep

Ttc9c  
Gpsm2  
Marveld3  
Ppp1r8  
Rasa3  
Sptbn1  
Smarca4  
Slc8b1  
Golim4  
Zfp316  
Dhx33  
Sh3gl2  
Limd1  
Pes1  
Tor1b  
Ocel1  
Cyb5r3  
Atg14  
Pop1  
Pwp2  
Appl2  
Socs7  
Ninj1

Kbtbd8  
Hlcs  
Thoc5  
Gdpd1  
Ngfrap1  
Spg7  
Ctc1  
Zmiz2  
Tbccd1  
Gm2000  
Nup50  
Slc19a1  
Ptk7  
Rgs12  
Ankrd13a  
Fam206a  
Galnt4  
Snx7  
Frmd8  
Ttc3  
Fam53a  
Cox7a2l  
Actr1a  
Spata2  
AI464131  
Aaed1  
Eefsec  
Ccdc163  
Tuba4a

Vps37b  
Slc35a3  
Med22  
Mks1  
Slc48a1  
Cstf1  
Ubox5  
Ccdc117  
Dgkd  
Nifk  
Pelp1  
Gemin5  
Mut  
Pkp3  
Phyh  
Rnpepl1  
Plcg1  
Ppp2r5d  
Rps6  
Smarca2  
Lonp1  
Tmem51  
Ndufs2  
Ppm1f  
Rps27a  
Camta2  
Zfp668  
Zfp507  
Tmem79

Nsun2  
Trmt1  
Ncoa5  
Chmp6  
Rps3  
Zfp142  
Eif3l  
Tcf19  
Acy  
Pccb  
Exd2  
Mrm1  
Elac2  
1110012L19Rik  
Wipi2  
Btbd2  
Atp8a2  
Reep4  
Kdm5b  
Nop2  
Reps1  
Nfs1  
Ddx21  
1810026J23Rik  
Sepsecs  
Krr1  
Spp12b  
Sap30bp  
Tll12

Sdhb  
Serac1  
Ccdc181  
R3hcc1  
Npm3  
Uvssa  
2700062C07Rik  
Ttll4  
Nudt21  
Ints9  
Xpo5  
Ets2  
Aco1  
Hnrnpul1  
Poldip3  
Aar2  
Immt  
Ranbp10  
Celsr2  
Setdb1  
Tbrg1  
Lrpap1  
Eif3c  
Zfp777  
Smc1a  
Cntrob  
Smurf1  
Eif3m  
Scarna2



Syng2  
Ampd2  
Aqr  
Dclre1a  
Inafm2  
Suclg2  
Zfp65  
Fam83g  
Abhd11  
Ckap2l  
Epb4.1  
Rpl18a  
Akap1  
Fbxl19  
Pygo2  
Ruvbl2  
Dctd  
Tspan8  
Pkdcc  
Lrrc40  
Ppip5k1  
Irgq  
Nnt  
Amigo1  
Bcl9  
Zfp84  
Ctr9  
Ddb1  
Pdxdc1

Abcb8  
Snw1  
Rnf40  
Txnrd3  
Gfod2  
Dhodh  
Tex261  
Rrp7a  
Nacc2  
Cep89  
Stk38  
Cbfa2t2  
Bmp7  
Mzt2  
Cog1  
Hspa9  
Inpp1  
Pom121  
D17Wsu92e  
Map2k3  
Zfp446  
Grpel2  
Suv39h1  
Stard7  
Eif3b  
Ift52  
Vav2  
Mrps9  
Map3k4

Tmem186  
Zfp68  
Cdk5rap1  
Appbp2  
Tradd  
Hars2  
Imp4  
Elp2  
Gm608  
Ogfod1  
Zfp282  
Ddx27  
Cpped1  
Pcyox1l  
Wrap53  
Rbmxl1  
Luzp1  
Atad3a  
Fbxo31  
Cep152  
Thumpd1  
Naa10  
Rpl18  
Uqcrc2  
Ipo13  
Ccdc51  
Ube2o  
Flna  
Tbc1d8

Znhit2  
Letm1  
Wdr41  
Tmem181a  
Mapk7  
Coq2  
Ilf3  
Cecr5  
Rad9a  
Csrp2bp  
Cs  
Tmem109  
Bzw2  
Tfip11  
Ube3b  
Mpzl1  
Timm10  
Gatb  
Prkcd  
Ccdc57  
Rprd2  
Det1  
Ppp1r7  
Jmjd8  
Prepl  
Abhd17c  
Fam83h  
Bud13  
Zpr1

Zfand2b  
Simc1  
Prcc  
Ybx3  
Kctd20  
Fam192a  
Gss  
Gtf2ird2  
Rnpep  
Zfp462  
Ddx41  
Elof1  
Mesdc1  
Anp32b  
Ccnyl1  
Slc45a4  
Ubqln2  
Naa35  
Ndufa9  
Fam53c  
Rpl12  
Aph1a  
Vps33a  
Qdpr  
Tpd52  
Dsg2  
Cep104  
Psap  
Bccip

Cep250  
Sf3a3  
Myg1  
Rps7  
Flii  
Alyref  
Txnrd1  
Gpr180  
Pgm3  
Pms2  
Baz2a  
Setd3  
Rcbtb1  
Tsfm  
Lrrc47  
Poc1b  
Racgap1  
Fyco1  
Cpsf3l  
Fbf1  
Wdfy2  
Ppif  
Tcp1  
Fpgt  
Etfa  
Mast3  
Cdc42bpg  
Zcchc17  
Sestd1

Dhx32  
Cpt1a  
Heatr2  
Ctnnbl1  
1110004E09Rik  
Tk1  
Nfia  
Slc22a21  
Pbx1  
Diexf  
Cox10  
Sympk  
Rpl8  
Smc3  
Traf3ip1  
Dnmbp  
Ctcf  
Zcchc14  
Pml  
Polk  
Eftud2  
Dmap1  
Tom1l1  
Mrps2  
Slc12a7  
Nup188  
Bcl2l12  
Arid5b  
Rad23a

Rab8a  
Phtf2  
Ncoa6  
Gm15800  
Rfc1  
Pdlim1  
Irf6  
Brd2  
Tbc1d2  
Xrcc6  
Smim15  
Zfp422  
Zfp598  
Odc1  
Mcm7  
Fam86  
Rfng  
Ing5  
Xrcc1  
Tmpe  
Frmd4a  
Gga3  
Rps26  
Xab2  
Fasn  
Csnk1g2  
Mtmr3  
Ints3  
Ccgc91



Ddx49  
Atp9a  
Atp2a2  
Pik3r4  
Tnk2  
Zfp869  
Kat6a  
Nsun5  
Dhx8  
Wiz  
Trak1  
Cc2d1a  
Rpl26  
Lmnb1  
Drosha  
Gnb2l1  
Srek1ip1  
Cct5  
Parp2  
Cnot3  
Dnajc7  
Kat2a  
Coq4  
Calm3  
Lmtk2  
Endov  
Zfp646  
Tusc2  
Ipmk

Ercc2  
H13  
Eif2ak1  
Wibg  
Scap  
Ralbp1  
Las1l  
Rbm47  
Slc9a1  
Rad51d  
Grhl2  
Polr1c  
Enthd2  
Scaf1  
Ankrd11  
Timm50  
Ppp5c  
Scamp2  
Ogdh  
Txlna  
Cherp  
Cep164  
Wdr81  
Pip5k1b  
Atp6ap2  
Madd  
Rnf114  
Agap3  
Ap3d1

Camsap3  
Mrpl28  
Mtf1  
Ptrk  
Anks1  
Hyal2  
Cactin  
Tceb3  
Abcf1  
Tdrd3  
Neurl4  
Carm1  
Cpd  
Sh2b3  
Wwp2  
Ptbp1  
Nelfb  
Plbd2  
Strn4  
Gle1  
Sh2b1  
Srp68  
Adrbk1  
Eif4a3  
Cd81  
Abl1  
Pgam1  
Atp6v0a2  
Dync1li1

Rab2a  
Glrx5  
Hipk3  
Stat5b  
Sh3d19  
Capn7  
Pkig  
Gnl1  
Ap3b1  
Eif3j1  
Esys2  
Pfn1  
Kif16b  
Rab1  
Rnf187  
Mrps24  
H2-T3  
Swi5  
Vapa  
Ttyh2  
Cdk12  
Vps29  
Ankrd16  
Sptssa  
Hadhb  
Bnip3l  
Stk25  
Hdac3  
Ttc7

Sh3gl1  
Seh1l  
Vti1a  
Slmap  
Atg2b  
Morf4l1  
Ube2j1  
Atp6v1d  
Mgat5  
Psme1  
Sec62  
Srcap  
Nfrkb  
Atp9b  
Cldn25  
Psmb6  
Stx3  
Eftud1  
Serf2  
Dvl1  
Fut8  
Pias2  
Tpi1  
Uqcr10  
Psm2  
Aven  
Arf4  
Hmgn2  
Aasdhpt

Cnot6  
Shprh  
Bach1  
Efcab14  
Uba5  
Pfkfb2  
Ndufs4  
Kat6b  
Ap4e1  
Anapc16  
Fam173a  
Zfp787  
Spcs2  
Trak2  
Tlk2  
Svil  
Lrrc16a  
Med13l  
Pura  
Actr8  
Cast  
Dnajc19  
Bcl11a  
Tbc1d14  
Ube2s  
Rbbp7  
Pih1d1  
Tceb2  
Zmiz1

Fbln1  
Cetn3  
Necap1  
Ap1g2  
Gnas  
Gabarapl2  
Smad1  
Kbtbd2  
Snf8  
Guk1  
Lrch1  
Rchy1  
Ap1s1  
Epb4.1l5  
Adh5  
Cdc73  
Maged1  
Cdc25a  
Rab3gap1  
Hipk2  
Cr1l  
Atpif1  
Cers5  
Nme7  
Ube2e3  
Atp5g1  
Capza1  
Plagl2  
Lsm1

Mex3c  
Clasp1  
Mvb12a  
Osbp18  
Mrpl13  
Tomm20  
Nhsl1  
Snrpa1  
Ppp1cb  
Rbm45  
Snx24  
Mtus1  
Trpm7  
Tbck  
Tspan3  
Fam13b  
Hist1h4i  
Ugcg  
Azi2  
Sub1  
Lrig2  
Gemin7  
Usp16  
0610040J01Rik  
Atp5j  
Usp14  
Fmr1  
Vdac2  
Rela



Fuom  
Gsto1  
Arf3  
Ripk1  
Tpp2  
Gpatch2  
Cdc42bpa  
Zfp809  
Cd63  
Bmpr2  
Otud5  
N4bp2l2  
2700089E24Rik  
Crb3  
Cep120  
Txnl1  
Blk  
Lypla1  
Uchl3  
Rsrc2  
Tgs1  
Ccnd3  
ErbB2ip  
Thoc6  
Mbd5  
Dynlrb1  
Tet2  
Mettl23  
Zranb2

Sf3b6  
Mob3b  
Ssbp1  
C78339  
Eea1  
Depdc5  
Itm2c  
Spc25  
Tmem106b  
Spata5  
Mycbp2  
Mff  
Bola3  
Smcp1  
Rab3gap2  
Amn1  
Dyrk2  
Nutf2  
Chrac1  
D8Erttd738e  
Pfdn2  
Pomp  
Fam133b  
Ccnb1  
Ube2f  
Snrnp48  
Tor1aip2  
Uckl1  
Arf1

Tnrc6a  
Pikfyve  
Ythdf3  
Edf1  
Fundc2  
Ndufb3  
Rhot2  
Herc4  
Cpsf6  
Bcl10  
Vil1  
Ubr1  
Rbm5  
Ndufa13  
Nsdhl  
Gpr89  
Yod1  
Rsb1l  
Mid2  
Atp6v1f  
Rnf2  
Usp28  
Fbxl12  
D030056L22Rik  
Prpf4b  
Pdzd11  
Cbr1  
Wdr26  
Mbnl1

Cops6  
Serp7  
Dgkq  
Ndfip1  
Fkrp  
Mars  
Tra2a  
Ptpg  
Vcpkmt  
Malt1  
Ppp3cb  
Nubp1  
Shfm1  
Ppp2r2a  
Ctps2  
Serinc3  
Tipr1  
Rfwd2  
Nt5c3  
Pdss1  
C1d  
Rdh11  
Ldha  
Dnm1l  
Pdcl3  
Hspe1  
Ormdl3  
Zc3h7a  
Cmip

Pdcd5  
Atrnl1  
2810403A07Rik  
Tmem208  
Nmnat3  
Trim8  
Cwf19l2  
Vps13c  
Med29  
NA  
Tiparp  
Herc1  
Pex7  
Zfp26  
Itfg1  
Traf3ip2  
2700081O15Rik  
Gtpbp8  
Rab18  
Rdh14  
Taok1  
Baiap2l1  
Snx4  
Unkl  
Xiap  
Shb  
St7  
Nfat5  
Mcu

Rai1  
Calm2  
Plekha3  
Leng8  
Arhgdia  
Rad54l2  
Slc44a4  
Taf5  
Usp12  
Tmx1  
Nufip2  
Pacrgl  
Tox  
Fgd4  
Chchd1  
Kctd13  
Actb  
Cyb5r1  
Cog5  
Hist1h1a  
Cenpa  
Gadd45a  
Eif1a  
1700019G17Rik  
Gpatch2l  
Papd5  
Zfp236  
Zswim6  
Cdkal1

Galnt3  
Pvrl1  
Ginm1  
Xrcc4  
Rcbtb2  
Tram1  
Dact2  
Hsbp1  
Erp44  
Macf1  
Prdm11  
Stk24  
Rab5c  
Rufy2  
Uba3  
Trafd1  
Foxp1  
6330416G13Rik  
Ccnjl  
Hyls1  
Tssc1  
Cflar  
Asah1  
Rnf138  
Jmjd1c  
Slc25a26  
Ankmy2  
Ube2c  
Zdhhc12

Nmd3  
Tpgs1  
Tbcb  
Fto  
Rab7  
Clca2  
Pex3  
NA  
Fndc3a  
Ppid  
Ndufb6  
Zfhx3  
Golga1  
Rars2  
Hnrnp11  
Cd2ap  
Zfp219  
Crtc3  
Btnl5-ps  
Pgg1b  
Zfp619  
Leprot1  
Mcoln1  
Fam96b  
Klh5  
Ppp1r13b  
Btbd10  
Fkbp2  
Nfib



Luc7l2  
Mier3  
Mgat2  
Plk4  
Rheb  
Zswim8  
Ak2  
Cox5b  
Mysm1  
Gphn  
Sergef  
Aff4  
Rnh1  
Fam76b  
Chchd2  
Nab1  
Esrra  
Sppl2a  
Magoh  
Gimap1  
Ska1  
Epg5  
Pin4  
Tmem87a  
Gm24339  
Med27  
Zwint  
Spr  
Rab1b

Gnai2  
Creld1  
Abi1  
Commd1  
Slc35f2  
Tmem150b  
Stx12  
Atad2b  
Mrpl27  
Wdr37  
Usp9x  
Ltbr  
Clk4  
Vps45  
Pex14  
Arap1  
Vamp2  
Ntan1  
Ube2k  
Med30  
Rpp30  
NA  
Dmd  
Kdm5a  
Tmem128  
Lamtor2  
Arpp19  
Srp19  
Gnpnat1

Phka2  
Rnf14  
Hist1h2ai  
Decr1  
Arf5  
Mcur1  
Ndst1  
Srp54b  
Tmem68  
Insig2  
Ubr3  
Atp5j2  
Tcirg1  
Cers6  
Uxt  
Atp6v1c1  
Srp9  
Ankle1  
Pitpna  
Rbm39  
Bnip2  
Gtpbp2  
Tbc1d12  
Rsrp1  
Prkdc  
Lsm6  
Slc12a2  
Mkln1  
Gm10282

Adam9  
Ankrd44  
Fzd7  
Tnfrsf10b  
Hist1h3d  
Cks2  
Tmem50a  
Crbn  
Nlk  
Zscan2  
Asb6  
Rab11fip2  
Rilpl2  
Syne2  
Pafah1b1  
Lemd3  
Serp1  
P2ry1  
Cep350  
Rhot1  
Auts2  
Osbp16  
Tmem167  
Eci2

2-Mar

Magi1  
Ergic2  
0610011F06Rik  
Scpep1

Slc38a2  
Brwd1  
Pts  
Ttc19  
Tfg  
Dennd2d  
Zfp513  
Plin3  
Apex2  
Zfp942  
Sema4g  
Rhbdl2  
AW549877  
Nedd8  
Cyb5a  
NA  
Polr3f  
Idnk  
Psd3  
Zfp871  
1110059E24Rik  
Zfyve16  
Jak1  
Naa16  
Fcho2  
Bpnt1  
Bahcc1  
Psm3  
Rogdi

Rab21  
Mbip  
Homer1  
Bcl2l11  
Pcmt1  
Chd3  
Ube2v2  
Fam45a  
Vps13a  
Oaf  
Aig1  
Slc35a5  
Dock7  
Dgcr6  
Cnp  
Sowahb  
Il13ra1  
Diap3  
Commd2  
Actr10  
mt-Nd4  
Gm10123  
Ncapg  
Pip5k1a  
Hist1h2ag  
Tmem230  
1110065P20Rik  
Ppp3ca  
H2afx

Rn7sk  
Ptprd  
Trip12  
Erc1  
Mroh1  
Alg6  
Fam162a  
St7l  
Tmem147  
D5Erttd579e  
Atp13a3  
Exoc2  
H2afz  
Nsmf  
Mtx3  
Uhrf1bp1l  
Fxn  
Bub3  
Rnf145  
Ddt  
Ppfibp1  
Man1a  
Gnai3  
Spag5  
Picalm  
Slc22a15  
Etv3  
Fubp1  
Rnf115

Plekhf2  
Rab14  
Zfp719  
Epas1  
Rcan3  
Snx18  
Ghitm  
Gbe1  
Pcm1  
Arhgap12  
Setdb2  
Gata6  
Zfp281  
Srsf9  
Bloc1s2  
Sh3bgrl  
Glyctk  
Sec63  
Mtch2  
Spag7  
Map4k3  
Papolg  
Gbas  
Sec23a  
Zfp62  
Kat2b  
Ube2e1  
Pyurf  
Pnrc1



Rabggb  
Rp2h  
Nr1h3  
Rictor  
Pld2  
Cd44  
Nudt4  
Cyb5b  
Acox1  
1110054M08Rik  
Numb  
Lrrc75a  
Myl12a  
Tmed4  
Nmnat1  
1110059G10Rik  
Dcaf6  
Itsn2  
Tbca  
Arpc5  
Dtd2  
Saraf  
Suco  
Hmgcs1  
Glrx  
Ada  
Slc38a6  
Uqcrb  
Fam178a

Ezr  
Slc39a1  
Tlk1  
Car12  
2700094K13Rik  
Lmbrd1  
Map2k2  
Fam49b  
Slc25a13  
Hist1h2bf  
Gm12940  
Esrrg  
Atp5l  
Cttnbp2  
Pcyt2  
mt-Co2  
Nphp3  
Chm  
Gng12  
C2cd2l  
Zfc3h1  
2310035C23Rik  
Klhdc8b  
Snx3  
Tmem205  
Dynll1  
Ccser1  
Fam46a  
Memo1

Snap23  
Slc9a5  
Csnk1g1  
Ythdc1  
Rnf217  
Rapgef2  
Ap5b1  
Rabep2  
Timm13  
D17Wsu104e  
0610007P14Rik  
Vcl  
Abhd16a  
Pabpn1  
Usp32  
Adnp  
Tjp1  
Baz2b  
Qsox1  
Hcfc2  
Cox11  
Eif4a2  
Eci1  
Hook3  
Smpd1  
Myo19  
Arpc4  
Dnajc13  
Cers2

Tfe3  
1810013L24Rik  
Styx  
Stim2  
Ciapin1  
Ube2m  
Ccdc186  
Hmces  
Gm21092  
Mocs1  
Wee1  
Uso1  
Map3k5  
Pigr  
Orc3  
Ccdc68  
Phip  
Nus1  
Trmt11  
Selt  
Hist1h2bl  
EII2  
Cdx2  
mt-Nd5  
Lamtor4  
Rab6a  
Rap1a  
R3hdm1  
Syde2

Zfp873  
NA  
Ilk  
Ralgps1  
Clcn5  
Cyp4v3  
Deb1  
Rnaset2b  
Gimap9  
NA  
Syngap1  
Tmem53  
Psmc3ip  
Ormdl2  
Scoc  
Rnaset2a  
Hsd17b4  
BC030336  
Ap1ar  
Lpar1  
Hist1h2bc  
Tbc1d8b  
Dcp2  
Otud3  
Cenpi  
Tpm4  
Hist2h2ac  
Myo1d  
Tax1bp1

Maged2  
Tusc3  
BC065397  
Tdp2  
Vwa5a  
Ftx  
Arl6ip1  
Spsb1  
Tm9sf2  
Pof1b  
Fam84a  
Gabbr1  
Cblc  
NA  
Gm22442  
Zfand3  
Jpx  
Plk2  
3110062M04Rik  
Map2k5  
Synj1  
Mrpl20  
Arglu1  
B230307C23Rik  
Nat2  
Tnfrsf11a  
Rbbp8  
Trip11  
Ptpn9

Chn2  
Pcna  
Sec61a2  
Slc35a1  
Tank  
Atg2a  
Gtf3a  
Rab11a  
mt-Co1  
Ost4  
Gm9762  
Zbtb24  
Eif4g3  
Zfat  
Vimp  
Tmem55b  
Erlec1  
Cisd2  
Mbnl2  
Pop5  
Ivns1abp  
Skap2  
Rnf135  
Kcnc3  
Tmem9b  
Cbwd1  
C630043F03Rik  
Ppp1r35  
Tbc1d23

4921524J17Rik  
Pfdn1  
Ndufc1  
2610001J05Rik  
Tgfbr2  
Trappc6b  
Rab10os  
Wsb1  
Edn1  
Slc30a1  
Glod5  
Slc18b1  
Crebl2  
Igsf23  
Oaz1  
Sft2d1  
Fam122a  
Atp6v0e  
Vegfc  
Dlgap4  
Cyp20a1  
Ap2a2  
Gm609  
Ggnbp2  
Nktr  
Gla  
2010012O05Rik  
mt-Cytb  
Hist1h2bj



Atp6v0c  
Spns1  
Tnip2  
Parp12  
Gm26549  
Mien1  
Nmi  
Larp1b  
Minpp1  
Exoc6  
Thns12  
Hsd17b12  
Stxbp3a  
NA  
Hist1h3c  
Stxbp4  
Rc3h2  
Enpp4  
2410127L17Rik  
Zcchc6  
Dip2a  
Idh1  
Rap1gds1  
Gkap1  
Lmbrd2  
Zfp326  
Tmem144  
Neo1  
Map4k2

Gys1  
Dennd3  
Gmip  
Reep3  
Prorsd1  
Snapc3  
Tmem203  
Zfp607  
Klhl3  
Cwc27  
Man2a1  
Rbpj  
Cdk18  
Herc3  
Ppp1r12a  
Hist1h3g  
Kctd9  
Pim1  
RP24-245M20.4  
Gstm5  
Hic2  
Aplp2  
Hist1h2bb  
Ccdc84  
Akt2  
Secisbp2l  
Timm8b  
Stx7  
Bloc1s4

Dmxl1  
Pld1  
Fbxo8  
Isca2  
Brip1  
Zfp758  
NA  
2700097O09Rik  
Agps  
Fam73a  
Rab9  
Fahd1  
Smc5  
Serinc1  
Eno1  
Gm28523  
Anapc10  
Pklr  
NA  
B4galt4  
Klhl28  
Rasa2  
Nrg4  
Atp7a  
Hist1h2bk  
Ankrd32  
Ganc  
Cdc42  
Ift22

Shroom2  
Hist1h3a  
Nars  
Ric1  
Hps5  
Ero1lb  
Cadps2  
Lhpp  
Sbno2  
Bpgm  
Osgepl1  
Prps2  
Areg  
Ccdc171  
Mzt1  
Tspan31  
Orc4  
Satb2  
Ube2b  
Oasl2  
1500011K16Rik  
Lss  
Zhx3  
Abhd10  
Sema4a  
Dennd1b  
Hist1h1c  
Eed  
Kalrn

Adi1  
Cox18  
Cenpw  
Slc35b3  
Tmem9  
Gopc  
Lif  
Ube2w  
Dtnb  
Rdh10  
Rab5a  
Zfp119a  
Nsmf  
Ptpn18  
Ugt2b34  
Srgap2  
Ythdc2  
Hist1h4f  
NA  
Insl6  
Uap1  
Nf1  
Onecut2  
Pde9a  
Gt(ROSA)26Sor  
RP23-463E8.1  
Tmem251  
Net1  
Xrn1

Tle4  
Zfp354a  
Ccdc58  
Txlng  
Atp5e  
Gm25911  
Ndufa2  
Mllt3  
NA  
2810403D21Rik  
NA  
Rasl11b  
Nradd  
Dhx36  
Rgs2  
Cbl  
Rhpn2  
Ip6k2  
Oaz1-ps  
NA  
Mtm1  
Tmem30a  
Atp5k  
NA  
Etnk1  
Exosc8  
Prdx1  
Raph1  
Rheb

2310057M21Rik

Crebrf

Asb3

Lpar2

RP23-306B14.3

Lsm5

Pls1

Eml5

Fbxl17

Hist1h2ah

Smarcd3

Pfkp

Sec61b

Athl1

Cript

NA

Ndufa6

Ttc14

1500015A07Rik

Ihh

Hist1h1e

Psph

Hist2h4

Snhg6

Vps13d

Tmem19

Bora

Tbce

Hist1h1b

Zfp639  
Slc38a9  
Sc5d  
Nfil3  
Slc4a5  
Thoc2  
Pter  
Mob4  
Zcchc11  
D630045J12Rik  
Dcun1d1  
Snhg4  
NA  
Rngtt  
Ubxn8  
Phlpp1  
NA  
Tead1  
2210408I21Rik  
Trip6  
Grhpr  
Yes1  
AA474408  
Hyi  
Wsb2  
2610005L07Rik  
Fer  
B630005N14Rik  
Eif4ebp1



Zfp825  
Nipsnap3b  
Mif  
Arl5b  
Ptpla  
Setd5  
Gmfb  
Phgdh  
Nipa2  
Glmn  
Fam214a  
Klh15  
Snrnp35  
Itgb1  
Bag2  
Gpx4  
Stat2  
NA  
Xylt1  
Mkl  
Mmp15  
Gnb5  
Tmsb4x  
H2-Q4  
Myo15b  
Itgb5  
Atg4c  
Morc3  
Thoc7

Myo6  
Rap1b  
NA  
Slc25a1  
Flrt3  
Atp10b  
Tceb1  
Palld  
Dpy19l4  
Ndfip2  
Cebpd  
Pik3ap1  
Ptrj  
Tmem258  
Kpna2  
Fzd4  
Cyth3  
Ccng2  
Rnft1  
Cdk1  
Tmed5  
NA  
Wdr7  
Pcsk4  
Maff  
Fth1  
Fbxo4  
Gng5  
NA

Cd38  
Zfp407  
Dusp4  
Tek2  
2610037D02Rik  
Gm21811  
NA  
Fggy  
Lsm8  
Zfp939  
Mapk8  
Ate1  
Gm26448  
Vps37a  
Fbxo25  
Sar1b  
0610010F05Rik  
Zcchc9  
Slc25a40  
Coprs  
Sertad4  
Gm10557  
Prdx4  
Hps3  
Fam188a  
Tbc1d2b  
Ndufaf2  
Ostf1  
Trib1

Clk1  
2210013O21Rik  
Hist1h3i  
Arl8a  
Tmbim4  
Trim3  
Rabep1  
Ube3a  
Mapk8ip3  
Pcyt1a  
Zfp280d  
Mrps36  
Mthfd2  
Bbip1  
Usp34  
Sytl4  
Fkbp1a  
Cspp1  
Vps54  
Dtx3  
Arl3  
Erlin1  
Zbtb12  
Slc11a2  
Tbx3  
Rnf186  
Lta4h  
Txnrd2  
Sorbs1

3110043O21Rik

Abhd1

15-Sep

Fam195b

Ahr

Strip2

Dab1

2900076A07Rik

Psmb8

Pigf

Myom3

Pink1

Atl2

Fmnl2

Vps13b

Psat1

Hist1h3e

Gm6712

Epm2aip1

Stau2

Ceacam10

Cgref1

Fgr

Pole4

Parp3

Sgms2

1810055G02Rik

Kcnj2

Hist1h2be

Vrk2  
NA  
RP23-411M4.2  
Rnf19a  
Cnnm1  
Porcn  
Spag9  
Chd2  
Plekhg4  
Arhgef3  
Slc1a2  
Capza2  
Rap2c  
Sectm1b  
Hist1h1d  
Ephx2  
Myo1e  
G2e3  
Sec24a  
Zbtb37  
Ube2a  
B4galt5  
NA  
Smdt1  
Rev1  
Clic1  
Dirc2  
Gm16386  
Tlr3

Slc35d2  
Dak  
Gm15489  
Fam208a  
Itgav  
Gm12320  
Dpp4  
Usmg5  
Hdhd3  
Rabgap1l

2-Mar

Srsf5  
Rabggta  
Ccdc71l  
Tbc1d10b  
Syne3  
Cpq  
Dynlt3  
Tpd52l1  
Chrnbl  
Chchd6  
Gdap10  
Phc3  
RP23-6F21.1  
Tmem176b  
Pstk  
Exoc5  
Mcts1  
RP23-349M18.1

Evi5  
Scp2  
Eny2  
Tmem241  
Map3k2  
Hist1h4j  
RP23-251N15.2  
Gm13139  
A530084C06Rik  
Rock2  
Gng11  
NA  
Brms1l  
Gm17250  
3110009E18Rik  
Heatr5a  
Prpf39  
Mmd  
WI1-1981I9.3  
Lysmd3  
Prom1  
Ispd  
Plscr1  
6820431F20Rik  
NA  
Gm11688  
Tmem37  
Scarb1  
Taf1d



Vti1b  
Ociad1  
NA  
Lrrc1  
NA  
Snx6  
NA  
Pcnx  
Pmaip1  
Ttr  
Pald1  
Higd1a  
Sypl  
Ttc6  
RP23-411M4.1  
Usp40  
Sec61g  
Hpgd  
C130046K22Rik  
Bbs7  
Shisa5  
Ube2d3  
Ccl9  
Prkch  
Lipe  
Slc35f5  
NA  
Clock  
Atp5g3

Hsd12  
Gpr128  
Abcc10  
Gm28424  
Spsb2  
Adamts10  
Atp6v1g1  
Nostrin  
Kif1b  
Utp20  
Galm  
Tmem29  
Osbp1a  
Rbbp9  
Mpc2  
Rfx5  
Fnip1  
Rnase4  
Tmem86b  
Hist2h3b  
Ndufa1  
Foxn3  
Atp1b1  
Pdc10  
Samd8  
Pdx1  
Nbas  
Pla2g6  
Cenpk

Parp4  
Far1  
Ophn1  
Nkd1  
NA  
Sra1  
Samd4  
Akr1c13  
Mef2a  
Srp54a  
Trim31  
Osr2  
Gm7160  
Bloc1s1  
Slc16a10  
Reep5  
Twf1  
Spopl  
Helz2  
Lrig3  
Ikbip  
Ulk3  
Scfd1  
Fbxw17  
Gcnt2  
Glud1  
Cdip1  
Eml6  
Hist1h4m

Appl1  
Ppap2a  
Sgpp1  
Tmem176a  
Azin1  
Gm6254  
NA  
H2-Q2  
Boc  
Tctex1d2  
1810058I24Rik  
Lmo7  
Rhog  
Usp27x  
Pipox  
Atn1  
Tsc22d1  
Cycs  
Lphn2  
Slc52a2  
Rundc3b  
Agfg1  
Tap2  
Fam160a1  
1110058L19Rik  
Hist1h2bp  
NA  
Sdf2l1  
Gatsl2

Acvr2a  
Stk38l  
Fus  
Tm2d1  
Serp1b1a  
5031425E22Rik  
H2-D1  
5830428H23Rik  
NA  
Rai14  
Atg16l2  
Prdx5  
Kif13b  
Uqcc2  
Fam35a  
Gm13341  
Msmo1  
Trim13  
Lpcat3  
Rnasel  
Arl2  
Lyn  
Pros1  
Gpr39  
Errfi1  
B3gnt2  
Klc3  
Pnpla3  
Avil

H2-K1  
RP23-187M7.5  
RP23-274C16.4  
Mppe1  
Cdon  
Col16a1  
Katnbl1  
Dpm1  
Sqstm1  
Kctd12  
Slc25a24  
NA  
NA  
Slc41a2  
Dst  
Snord83b  
Lrif1  
Plcl2  
Lactb2  
Lonp2  
Cept1  
Ap3s1  
Uqcrq  
Med13  
Dzip3  
Bet1  
Galt  
Smad2  
Gapdh

Vsig2  
Dram2  
Tmem54  
Mtap  
Phf1  
Vldlr  
Ncoa1  
Trip4  
Samhd1  
Hap1  
RP23-46L5.1  
Slc2a5  
Rbm26  
Nhs  
NA  
Gtf2a2  
Gm11451  
Acot13  
Psmg4  
NA  
Lactb  
Isg15  
Adk  
RP24-93F24.2  
Rassf10  
NA  
Il15  
NA  
A630072M18Rik

Glcci1  
mt-Nd1  
Nfkbiz  
Asap1  
Xaf1  
Klhl2  
Adcy3  
Ror2  
Ppm1b  
Ubt1d1

7-Mar

NA  
Cyr61  
Atxn7  
Afap1  
Arpc1b  
Diap2  
Lrrc28  
NA  
Klc2  
Il3ra  
Ogt  
2310015A10Rik  
D130040H23Rik  
Zfp947  
Clasp2  
Slc9a3r1  
Heph  
Tgm2



Insr  
Snora47  
2810002D19Rik  
Rpl24  
S100pbp  
Snx13  
Parp9  
Mfsd8  
Antxr2  
Skil  
1110007C09Rik  
mt-Nd6  
Tmem243  
Fdps  
Ap1s2  
Atrn  
Oaz2  
Adipor2  
Prosc  
Egln3  
Nfkbia  
Ino80dos  
Wdfy1  
Prss23  
Tsku  
Trp53inp2  
NA  
Pygl  
Acot4

Mir17hg  
Gm23442  
Tmem126a  
Mospd2  
Aadac  
Mn1  
Zfand5  
Sfxn3  
A930035D04Rik  
Syap1  
B4galt1  
Lcorl  
Dhx58  
Gpcpd1  
RP23-180C14.1  
NA  
Dgat2  
Flot1  
Cyp51  
Gimap8  
Gm26652  
Gm29170  
Ano6  
4930503L19Rik  
Lmo4  
Zfp711  
Tcea2  
Swt1  
Zufsp

Romo1  
3110057O12Rik  
NA  
Apaf1  
Malat1  
Man2b2  
Dnajb4  
Mocos  
Pqlc2  
Arhgef26  
Rbm4  
Fchsd2  
Prss12  
Arhgap29  
Slc25a28  
NA  
4732490B19Rik  
Kdm4c  
Ceacam2  
Csrnp1  
Slc26a3  
Ankrd54  
NA  
Stard3nl  
Steap1  
Zc2hc1a  
Mir1938  
NA  
Spata17

Maml3  
Lrba  
Cox6b2  
Tmem41b  
Uba7  
Gm7173  
Gm4707  
Acad11  
Snora31  
NA  
Slc31a1  
Gsap  
Aldoa  
Coq10b  
5031434O11Rik  
Rnpc3  
Map3k13  
Ly6e  
Itga2  
Eepd1  
Tnfrsf1a  
Fez2  
Tmem64  
Naip3  
Nfkbie  
Lacc1  
Rab4b  
Cln3  
Aip

Ptp4a3  
Nr4a3  
Stim1  
Ndel1  
Ptpm  
Sipa1  
Lpgat1  
Mapk4  
Ppt1  
E130311K13Rik  
RP24-172B22.6  
Rps6ka4  
NA  
Acbd4  
Fkbp14  
4732440D04Rik  
RP23-114L12.3  
Bco2  
Oat  
Gm15869  
Pparg  
4932438A13Rik  
C630016N16Rik  
Snora73b  
Ifnar2  
Scp2-ps2  
Gm26814  
Fam172a  
Csf2ra

Rnf213  
Hip1r  
Dnaja4  
Pign  
NA  
AU041133  
Gm3608  
NA  
Slc39a14  
Ccdc148  
Pitpnm1  
Trim24  
NA  
1110028F11Rik  
Thrb  
Rmdn1  
Cxadr  
Sox6  
Sp140  
Pbld1  
Itpr2  
NA  
Gm20707  
Gm26529  
RP24-88F2.3  
NA  
NA  
Wnk4  
Map1lc3a

Aamdc  
Adamts1  
Magee1  
Oasl1  
RP23-474B13.2  
Ssh1  
Mir22hg  
Gm20939  
AA986860  
Pde4d  
Smpd2  
Agl  
Naip5  
Sugct  
Pgs1  
Echdc2  
Slc5a1  
Hmga2  
Tmx3  
Fam118b  
Tle1  
Tcf7l2  
BC021785  
Irak2  
Hist1h4n  
Cox16  
RP24-423J19.3  
RP23-323H18.2  
Muc13

Gm16751  
Nckap5  
Slfn10-ps  
Tmem135  
Trim34a  
Arhgap26  
Atox1  
Rnd3  
Dhrs1  
Pfkfb3  
Homer2  
Taf1b  
Atp11a  
2410089E03Rik  
Vegfb  
Agpat9  
Pcsk9  
Scai  
NA  
Zfp442  
Mx2  
Ppp2r2d  
Garem  
Ap1m1  
2310001H17Rik  
Hmx3  
Stk3  
Prdx6  
RP24-338G10.1



mt-Nd2  
Spryd7  
NA  
Myadm  
Camk1  
Commd6  
Zfp945  
Chuk  
Slc1a4  
Trpm5  
Slc46a3  
F5  
Il17rb  
NA  
Dlgap3  
NA  
Gclm  
Gm17354  
NA  
NA  
9130230N09Rik  
Phlpp2  
Asah2  
Drc1  
Zfp937  
4930539J05Rik  
4933426M11Rik  
Pcsk6  
Tsc22d2

Lck  
Adck5  
Mir5107  
1110020A21Rik  
Bambi  
H2-DMa  
NA  
RP23-269E5.10  
Dock4  
Them6  
Gm17082  
Nos1ap  
Hoxb6  
Impa1  
NA  
Atf5  
Gtdc1  
1810046K07Rik  
Hint3  
RP23-296I6.7  
NA  
Hebp1  
Gm15595  
Nyap1  
Gstm7  
NA  
NA  
RP23-296I6.8  
Mss51

Nin  
Ascc3  
Ulk2  
Comtd1  
Prmt2  
Bst2  
RP23-32A8.1  
Mall  
NA  
Mid1  
Syncn  
Pik3c2a  
Gm13251  
S100a10  
RP23-327M13.6  
Snord49a  
Gm22068  
5033403F01Rik  
Gm17207  
Sorbs2  
Lpar6  
Smim22  
Lptm4b  
RP23-363M8.2  
Tab3  
Il15ra  
Slc25a20  
A230050P20Rik  
NA

Mtcp1  
Mrc1  
Rhoc  
Zfp433  
Wwc2  
2900093K20Rik  
RP23-116P18.2  
Slc3a2  
Tbk1  
Tnfsf13  
Dpyd  
Tnf  
NA  
RP23-423B1.6  
Nbea  
Ctnnd1  
Mogat2  
Naip6  
Large  
Rnf125  
RP23-250G8.9  
NA  
NA  
Cml1  
Gm23444  
Fbxo6  
Nxn  
Zdhhc15  
Fam134b

Cul7  
Gm13248  
Dnase2a  
RP23-477C13.3  
Gm12207  
Plscr2  
Als2  
4931406C07Rik  
1700024P16Rik  
Npas2  
Pdgfc  
Snhg3  
Herc2  
Cftr  
Camkk2  
Mthfs1  
Taf9b  
Ebp1  
Efcab5  
Dbi  
Cyp2j6  
Ptbp2  
Dapp1  
NA  
Iqcb1  
Sdc2  
Tnfrsf23  
Map7  
RP23-125I14.1

Mtmr7  
Pvr  
Immp2l  
Dusp6  
4933404O12Rik  
Eml2  
Il22ra1  
RP23-296I6.4  
Fam184b  
RP23-444I6.3  
Nptn  
Ptp4a1  
BC030499  
Hist2h2ab  
Scarna9  
Lamp2  
Vipr2  
Chpf  
Cd74  
Fam101b  
Cyp2j9  
Atp11c  
Gm15372  
Capn1  
Gm18190  
NA  
Brwd3  
RP24-444I15.1  
Pbx3

Fam3c  
Ttc7b  
Dleu2  
A1cf  
Tm6sf2  
Brdt  
RP23-379F6.3  
Orai3  
Arl4a  
Rhobtb3  
Epb4.1l1  
Pycard  
Ripk2  
RP23-93D12.1  
RP23-334M9.5  
Tbcel  
Btl6  
Gm7467  
Ces2c  
RP23-327M13.3  
Efcab11  
Crem  
RP23-414A20.3  
RP24-432B3.4  
Syt12  
NA  
Snora41  
NA  
A930033H14Rik

Dnajb3  
NA  
Pik3r5  
RP23-102B12.2  
Tmem161b  
Snord17  
NA  
4732491K20Rik  
Ube2l6  
Mad2l2  
Ppp1r14c  
1700065D16Rik  
Hivep2  
Snord58b  
Gm25835  
B4galnt3  
1110008P14Rik  
Ly75  
NA  
Eva1b  
NA  
Cfl2  
NA  
Mkrn2os  
NA  
Grina  
Gm28439  
Rassf4  
Snora21



Acot1  
Pik3cg  
Trabd2b  
Susd1  
Vkorc1  
4833417C18Rik  
Sbsn  
Chka  
Lincpint  
NA  
NA  
Map4  
Cblb  
Mgst1  
Gm5560  
Nr3c2  
Ubxn2a  
Pttg1  
Slc22a3  
Rnf121  
Optn  
Itpripl2  
Cd46  
Impg2  
Rasal2  
Rab2b  
Ppnr  
Dock8  
Casp6

Apobec3  
Btg3  
Bok  
RP23-412L18.6  
Cyp2r1  
NA  
Tspan13  
Cytip  
Ly96  
Slc17a4  
Anxa13  
Entpd7  
Apip  
A230046K03Rik  
H2-M3  
RP23-412L18.5  
NA  
Spg20  
Mtus2  
Unc119  
Gm22973  
Gm22154  
Slc4a7  
Ptprc  
Sp100  
Gm15533  
Hoxb2  
Meis3  
NA

Cpeb4  
Mapre3  
NA  
Rnf128  
Tma7  
NA  
Egr4  
Tsga10  
Lypd8  
Gm22806  
RP23-349H13.2  
Atp10d  
A930007119Rik  
H6pd  
Aldob  
Nespas  
NA  
RP23-392C14.1  
Gm9844  
NA  
NA  
RP23-114L12.6  
NA  
Tmem236  
Zfand6  
NA  
Smpd5  
Ppm1l  
Cth

2810417H13Rik  
Grb14  
Rnu11  
RP23-339P23.1  
Amacr  
NA  
RP23-16D16.13  
Eogt  
Kcnh1  
Lppr2  
Tmem65  
Gm8113  
AW112010  
NA  
NA  
Eci3  
Neur1a  
Il18  
Klf5  
S100a13  
NA  
RP24-273P12.4  
Fut2  
Prss16  
Spib  
Akap17b  
Il7  
NA  
Dcbl1

Ccdc129  
Casp12  
Btl1  
Gm26853  
NA  
Tbc1d24  
Gpr22  
NA  
Gm20696  
1810022K09Rik  
Smpx  
Themis3  
Alcam  
Ifrd1  
Prkaa2  
Gm13237  
Ephb6  
Cystm1  
NA  
RP24-282D16.9  
NA  
Hck  
Gm13689  
Tube1  
Tmem229a  
Hnmt  
Hmox1  
Alox5ap  
NA

Tmsb10  
Arhgap18  
Dgkh  
4930556M19Rik  
Ociad2  
AF357399  
Abcc6  
Pou2af1  
Vamp5  
1110036E04Rik  
NA  
Gm10425  
Gpd1  
Clcn6  
Flot2  
Slc10a5  
Syne4  
Hpgds  
Gm14921  
Zfp697  
Smarca5-ps  
Lpcat4  
Gm24091  
Cyp2d22  
Tuba1a

6-Mar

RP23-358I10.3  
Cobll1  
Gem

Tmem181c-ps  
Fam213a  
Inpp1  
NA  
RP23-323H18.1  
Adam4  
Gm22009  
NA  
NA  
Foxq1  
1010001N08Rik  
Gsdmd  
Cyyr1  
Gm15246  
Cd14  
Neu1  
NA  
NA  
Exoc3l4  
Nrp2  
NA  
Slc5a4b  
Rtp4  
RP24-546N2.2  
Rnf24  
Svip  
Rph3al  
Pkh1  
Dgki

B3gnt7  
NA  
Gm24616  
RP23-392C14.2  
1600014C10Rik  
RP23-471J16.2  
Hopx  
NA  
NA  
NA  
RP23-232K16.2  
NA  
Synpo  
RP23-309A8.3  
Spry1  
Ect2  
RP24-270A10.5  
NA  
Sccpdh  
Gm28323  
Ltc4s  
Gramd1a  
Fyn  
Nt5dc2  
NA  
NA  
NA  
RP24-310B3.1  
Chrm3



D230022J07Rik  
Pibf1  
NA  
Gm13657  
NA  
Fam216a  
Ahcyl2  
Tymp  
Rab11b-ps2  
Mal2  
NA  
Gm15859  
RP23-36P10.11  
Akr1b10  
NA  
Spaca6  
NA  
NA  
NA  
Hist3h2bb-ps  
Snora62  
4632427E13Rik  
Fam89a  
Aifm3  
Gprc5c  
Rgs22  
NA  
NA  
St3gal6

Tmem253  
Fkbp11  
NA  
Ext1  
Tlcd2  
NA  
Soat2  
Casc4  
Gca  
Cib2  
Tnfaip3  
Gpr21  
Tmem263  
Gm26397  
NA  
Gm22192  
Aldh1l1  
NA  
Gm5784  
NA  
Slit2  
Gm25788  
Gm21399  
Slc35e3  
Rdh16  
RP24-318B11.1  
Rel  
5430402O13Rik  
Gm9320

Snord13  
NA  
G6pc  
Sema6d  
Gm17484  
NA  
Ildr1  
Snord85  
Adssl1  
NA  
Gsr  
H2-Eb1  
Tbx3os2  
Ptpmh  
I18bp  
NA  
Lrmp  
NA  
Slc4a8  
Dhrs11  
Gm20498  
NA  
Tmem229b  
Rhod  
NA  
NA  
Pdgb  
Trim30d  
4930511M06Rik

NA  
Gbp7  
Gnpda1  
Tlr2  
6720427I07Rik  
Arhgef9  
9130024F11Rik  
Gm16523  
NA  
Gm17024  
Pkia  
NA  
Plod1  
Col15a1  
Exph5  
mt-Tm  
4930594M22Rik  
Gm26621  
Gm2237  
NA  
Ccdc88a  
RP24-283P23.1  
Slc2a2  
Sptb  
Gm27010  
NA  
Sox12  
Cadm1  
Dclk1

Gm25099

NA

NA

A630081J09Rik

Gm20426

Nbeal1

RP24-540L1.2

Arntl2

Xylb

Boll

NA

Atp2c1

Nr4a1

Abcb4

Tspan6

NA

NA

NA

Gm15200

Pgrmc2

RP23-413K6.4

Moxd1

NA

Slc26a6

NA

Parp14

Wdr44

NA

Lancl3

Oas2  
Mpp2  
Gm7221  
Trp53i13  
Gm26514  
Fcnaos  
Stat3  
Mboat2  
Rnf144a  
RP24-546N2.5  
RP23-474B13.1  
RP24-395F2.1  
Fes  
RP24-303N8.3  
Gm6768  
Cdyl2  
Agmo  
RP24-429G21.3  
Rpl10-ps6  
Spry4  
Cald1  
NA  
NA  
Frk  
Gramd3  
Bst1  
Ralgapa2  
Snord65  
RP23-406B13.9

Igdcc4  
Cers4  
Gm25544  
C1rl  
NA  
Gm22888  
Slc3a1  
Fabp1  
Gm25206  
Gm13166  
Gm22362  
NA  
Sdk1  
Gm8116  
NA  
RP23-412L18.1  
Ssfa2  
Ccdc159  
Gm24494  
RP23-124N16.3  
NA  
Snrpn  
Gm18588  
H2-DMb1  
Idi1  
Sult1b1  
Il11ra1  
Klf6  
NA

Gls  
RP23-79K5.3  
BC002163  
Tfpi2  
A230028O05Rik  
Rnasek  
Acaa1b  
NA  
BC025446  
Btbd11  
NA  
3300002I08Rik  
Dennd5a  
Vmp1  
Oas1b  
Gm24445  
mt-Tw  
Gm7030  
Sh2d7  
Lurap1l  
Gm13380  
4933429H19Rik  
RP23-375F6.4  
Ppp2r5b  
Zfyve9  
Wwtr1  
Arid3a  
Limd2  
Ckb



Bbox1  
RP24-147G7.2  
NA  
Gm15848  
H2-Aa  
Ffar3  
NA  
Slc9a2  
RP23-16D16.12  
Eif3j2  
Tmem106a  
Inpp5d  
NA  
Cdkn2b  
NA  
NA  
NA  
RP24-221A23.7  
Hoxb5  
Clec2h  
Cml5  
NA  
RP23-461P14.1  
Anxa3  
Cideb  
Cd47  
Rasl11a  
Herc6  
RP23-152I6.2

Ces2e  
NA  
Ghr  
Tspyl5  
H2-T24  
NA  
NA  
Chpt1  
Aldh8a1  
Ly6g6d  
Plekhf1  
Chst11  
Cdr2  
Klf7  
Gm17195  
Bmp1  
Gm15651  
Tmc5  
Cep170  
NA  
Sh3bgr  
Dzank1  
Leap2  
NA  
Cldn2  
AA474331  
Zfp185  
Gm22392  
Pea15a

NA  
Igsf5  
NA  
Adh1  
4930458D05Rik  
Chat  
Kirrel3  
Slc12a5  
Dnm1  
Mptx1  
Tcf7l1  
1700016K19Rik  
Btc  
Zfp618  
RP23-93D12.2  
Tm4sf4  
NA  
RP23-16D16.14  
Gm20517  
Gm15658  
Pde4b  
Ly6g6f  
NA  
NA  
Atp2b1  
Gm17066  
Acsl4  
Sh2d6  
Hexb

Rac2  
Neb1  
NA  
MyI9  
Tnfrsf11b  
Hopxos  
Rhobtb1  
Gabre  
RP23-448A11.17  
Degs1  
Snord70  
Slc16a11  
Mab21l3  
Anpep  
NA  
Mir31  
Fst  
Gm22980  
Ccl20  
RP23-380F8.2  
NA  
Gm14636  
Prkce  
Mov10  
Dusp12  
Erdr1  
Ptgs1  
NA  
Pgap1

Dao  
Ypel2  
NA  
Grhl3  
NA  
H2-Q1  
NA  
Cyp3a13  
Crot  
NA  
Slc7a8  
Slc5a9  
NA  
RP23-412L18.2  
Gm13570  
Gm4468  
Gm27572  
Ifnlr1  
Ptpn2  
NA  
Fads6  
Eno1b  
Tm4sf20  
Nrn1  
Ccl27a  
Gm28043  
Trim35  
NA  
NA

NA  
Clic5  
Pde11a  
RP24-75E15.5  
RP23-260J11.4  
Pcdh19  
Gm23849  
Tnfrsf21  
Ms4a12  
Mir3968  
Gm26202  
Stk17b  
Ugt1a6a  
Msx1  
Mfsd2a  
RP23-380F8.1  
Gm5796  
Gm3617  
Ankrd22  
Cnksr2  
Ugt2b35  
Snora30  
Rbpms2  
Slc7a15  
NA  
Fyb  
Zfp189  
NA  
Sgk3

mt-Tq  
NA  
RP24-193D9.4  
Etv5  
NA  
RP23-380F8.3  
Usp18  
Slc39a4  
Mro  
Icam4  
Plac8  
Lipa  
Sgcb  
Xdh  
NA  
Ttc22  
Gm27271  
Gm17191  
Bche  
Tbxas1  
RP23-445K23.5  
Cidec  
Apol9a  
NA  
Nceh1  
Btl7-ps  
Gm26513  
Snord110  
Rab34

Snord8  
NA  
Slc22a13b-ps  
RP23-461O23.2  
NA  
4930405O22Rik  
6430590A07Rik  
St6gal1  
Fhl3  
NA  
NA  
Gm16764  
Gm5566  
Gm20682  
Ank1  
Gm29036  
NA  
Npy2r  
RP24-378J8.2  
RP23-103F2.2  
Cdk17  
Gm15793  
Tmem173  
RP24-511H12.2  
NA  
1110046J04Rik  
Rbpms  
Scin  
Cnep1r1



RP23-95I4.3

Prkg2

Il33

Gm27960

Parp8

Gm5590

Ccbe1

Maf

NA

RP23-447L15.3

Ap3m2

A330023F24Rik

NA

E230013L22Rik

Gm15226

Phactr1

Gm14537

Hlf

Tmem150a

Mical2

Proz

Snord11

Rps19-ps7

Vmn1r53

NA

Ogfrl1

Gde1

Clca1

Cdkl5

RP23-16D16.5  
Nrp1  
Siglecf  
Gm22858  
Megf9  
Gm10634  
Man2a2  
Angptl4  
3110070M22Rik  
Mfhas1  
Urad  
Snord4a  
Abcb1a  
Rnu73b  
Rgs19  
Slc2a7  
NA  
Ddhd2  
Gm10447  
Sgk2  
Tnfrsf12a  
Gm25360  
Kitl  
D130043K22Rik  
NA  
Sprr2a3  
NA  
Foxd2  
RP23-114N13.2

Gm24920  
RP24-282D16.11  
NA  
1700034P13Rik  
Acot6  
Thpo  
Ddx60  
NA  
RP24-167M10.4  
RP23-75P5.3  
NA  
NA  
RP23-445K23.3  
Gm26744  
Gm26870  
NA  
F3  
Pde8a  
Fam198b  
Adcy8  
NA  
3110021N24Rik  
Gm26175  
RP23-412L18.4  
Gm25188  
1810064F22Rik  
Acer3  
Ugt1a1  
Plau

RP23-232K16.4  
NA  
Sema3d  
Npc1l1  
Nmrk1  
NA  
NA  
Gm23472  
Fcna  
Mpp4  
NA  
Spire1  
Gm26535  
Gm28791  
Gm6587  
Apol9b  
Spta1  
Gyk  
NA  
Mpp1  
NA  
Gm20703  
Akr1c19  
Gm23136  
Zfp385a  
WI1-817D1.2  
A930001C03Rik  
RP23-61D6.3  
Gm26493

NA  
Fam129a  
RP23-353G11.6  
Gm16464  
Ept1  
Gm11470  
NA  
4930539E08Rik  
NA  
Gm23105  
NA  
Acn9  
NA  
Zbp1  
Anxa5  
Acat3  
Gpm6b  
RP24-310B3.2  
NA  
9530046B11Rik  
5033423K11Rik  
Gm13594  
NA  
Dmxl2  
St3gal1  
Zcchc3  
Fas  
Slco2a1  
Sord

Gda  
Gm19325  
BC089597  
Apob  
NA  
RP24-378J8.1  
S100a1  
RP23-412L18.3  
NA  
NA  
Gm12506  
NA  
Alox5  
mt-Ta  
Fam69a  
Fabp2  
Erich5  
Gm26669  
Bach2  
Cxcl11  
Upk1b  
NA  
Ppm1m  
6330562C20Rik  
Gm24924  
9330179D12Rik  
Trim30a  
Erich4  
Msn

Cfap44  
Cpeb3  
Aldh3b1  
RP24-571N3.1  
Gm24119  
NA  
Gm13786  
4930563E18Rik  
Gm5620  
Gm7120  
Krt222  
NA  
Gm17193  
Mttp  
NA  
Acot9  
NA  
RP24-92A2.1  
Sec16b  
Gm25636  
Zfp286  
Arg2  
NA  
Fam110b  
Gm15368  
Gm22952  
NA  
RP23-175G2.3  
NA

NA  
NA  
Ctgf  
Klb  
Basp1  
Prkcb  
RP23-415C3.6  
NA  
NA  
Gm15344  
Wfdc15b  
NA  
Depdc7  
Snora23  
Itga9  
RP24-566B6.2  
RP24-546N2.4  
NA  
Gm23734  
Tgfb3  
RP24-260D21.1  
Krt20  
NA  
NA  
RP24-458F14.4  
Clec2d  
NA  
Apobec1  
Sepp1



Ltk  
RP23-175G2.2  
Gm19967  
Snrpn  
NA  
Snord53  
Gm16035  
Atp4a  
Pdk4  
NA  
Casp4  
Ceacam20  
Gm26690  
Bmx  
Gm16236  
RP23-16D16.4  
mt-Tp  
RP23-61D6.5  
Ly6a  
5730405O15Rik  
Snord92  
Ank  
Arl4c  
NA  
RP24-574O8.8  
Pam  
Jak3  
RP23-170E22.1  
Lgmn

Gm11373  
Ackr4  
Armc2  
Oplah  
Mfap3l  
Cfap69  
Rab30  
Gm12892  
Plekhs1  
Pcsk5  
Gm24233  
Ndrp1  
Gm24727  
RP24-227F14.1  
Gm9923  
Gm1866  
NA  
Cd300f  
NA  
Mir7-1  
Ntng2  
Cadm4  
Adap2  
NA  
Col27a1  
NA  
9630028B13Rik  
Gm5549  
Sat1

Mpz  
Setbp1  
Rgs5  
NA  
RP23-328J8.4  
Capn3  
NA  
RP24-327F2.1  
Fgl2  
H2-Q10  
Vnn1  
Hoxb3  
Shroom1  
1700125G22Rik  
Aebp1  
NA  
Zdhhc17  
Cfi  
Hnf4g  
Acadl  
NA  
Cep85l  
Gm13152  
NA  
Apbb1ip  
Unc79  
NA  
Pxdc1  
Slc25a36

Clca5  
NA  
Slc39a8  
Fam149a  
Clec2f  
NA  
RP23-232K16.3  
Rgs13  
Gm12996  
Gstt1  
2010003K11Rik  
NA  
1700011H14Rik  
Emid1  
RP23-346I1.2  
Hkdc1  
Ifi27I2b  
Tmigd1  
NA  
NA  
Clmp  
NA  
Nenf  
Oas3  
Snord73a  
9230105E05Rik  
Snord72  
Gm16200  
RP23-114N13.4

Slc5a11  
1700023E05Rik  
Gm23301  
NA  
RP23-175G2.4  
Ak1  
NA  
Mypn  
RP24-546N2.1  
NA  
Stard9  
Mir763  
Foxd2os  
Prrx1  
Gpr4  
Samd9l  
Itga5  
NA  
Akr1c14  
Plek  
Rab31  
NA  
Matk  
Mup-ps23  
Cfb  
4930599N23Rik  
Slc4a3  
Gm17194  
Gm14057

Celf4  
Lrrc19  
Plscr4  
Mir99ahg  
Ltbp3  
Fgd3  
Tc2n  
Hmgcs2  
G630018N14Rik  
Pla2g12b  
Gm29488  
RP24-546N2.3  
Abhd3  
Smad9  
Cda  
Hcn1  
RP23-34E15.4  
Ifit3  
Reep1  
Gm12785  
NA  
RP23-298I7.2  
Ces2d-ps  
Slc16a2  
NA  
NA  
Lphn3  
Ccdc39  
NA

Cxcl9  
9130008F23Rik  
Gm28730  
Ifi44  
Snx32  
NA  
P4ha2  
NA  
Pcp4l1  
Hif3a  
Gm26287  
Zfp286os  
Abcc5  
RP24-441N3.3  
Gm15987  
Pdzd7  
NA  
Gm14446  
NA  
Slc25a4  
NA  
Gm13151  
NA  
Malrd1  
NA  
Ccdc88b  
Mical1  
NA  
NA

Ube2e2  
Gm26624  
NA  
Map2  
Akr1b7  
NA  
RP23-264G9.1  
Kcnv2  
Atp8a1  
Gm4952  
Aldoc  
D7Ert715e  
Tnfsf13b  
Lama3  
Saa3  
Acyp2  
mt-Te  
Gm22328  
2010106E10Rik  
Gm14935  
Nrgn  
Cped1  
4930581F22Rik  
Abcb1b  
Fgl1  
NA  
NA  
NA  
Sh3kbp1



Ptgs2  
Il34  
NA  
Nav1  
Gm17709  
1700120B22Rik  
mt-Ti  
NA  
Cxcl10  
Gm16348  
NA  
Gm25291  
Atp2b2  
Ifitm1  
RP24-386D8.2  
Cyp3a25  
2200002J24Rik  
Arsi  
Lrrn1  
NA  
RP23-30D21.3  
Gdpd2  
Snord71  
Egfl7  
Gcnt1  
Btl2  
Me1  
Plekhg6  
NA

Tuba3  
Gm22571  
Htra1  
Akt3  
NA  
Ablim3  
RP23-59N8.3  
Ak7  
Cmtm8  
Zbtb46  
Cyp2c44  
Cryz  
Pip4k2a  
NA  
Hsd17b13  
Ms4a18  
Gpr126  
Nxpe3  
Lrrc39  
Gm10814  
Pla2g4c  
NA  
Ifi27  
Gm13835  
NA  
Bmp2  
NA  
Slc9b2  
Gsta4

Papss2  
Arhgap6  
NA  
NA  
Serpina3g  
Tnip3  
NA  
Tifa  
NA  
Akr1d1  
n-R5s174  
Barx2  
Igf2bp3  
Asz1  
Gchfr  
RP23-273N4.8  
Vnn3  
RP24-574O8.9  
Acot2  
BC064078  
Glis3  
Mboat1  
Gm26129  
Nr1h4  
F10  
Npl  
NA  
Gm15528  
RP23-180F3.2

Slc51b  
Gm12042  
Klf8  
Serpinh1  
RP24-290F15.1  
Gm20513  
Xkr9  
Ccdc169  
Gm6652  
NA  
RP23-56C10.3  
Nkx1-2  
Gm26839  
NA  
Gm15222  
Ank2  
Adh4  
NA  
Slc27a5  
NA  
Prdm1  
NA  
Pkd2l2  
NA  
NA  
Adamts12  
Ncoa7  
Nlrp9b  
NA

Wfdc16  
RP24-300L5.1  
Best3  
Syde1  
Cxcl1  
Alpk1  
Cmb1  
NA  
Trim58  
Cacna1d  
Gm19503  
Gm16238  
Itgad  
Insl3  
RP24-429G21.7  
Me3  
NA  
NA  
Alox15  
Sult1a1  
Itga1  
Slc16a9  
Gm25980  
Bmp4  
Sucnr1  
Mir452  
Ppp2r2b  
Lrrtm2  
Ppfia2

Gm11440  
Dzip1l  
Mbl2  
Mir1931  
NA  
Mme  
Snord91a  
Rmdn2  
Eif4ebp3  
NA  
RP23-81L22.3  
4930402H24Rik  
NA  
Gm4211  
NA  
Glpr1  
Dscaml1  
Cpn2  
Neu3  
Gm3470  
Fam189a2  
Bnip3  
Plagl1  
Gm22672  
NA  
Dusp22  
NA  
D330045A20Rik  
Slc16a7

Tmem88b  
RP23-447L15.2  
Tmem140  
NA  
NA  
Gm26861  
Acsn5  
Ugt2a3  
Gpr85  
RP24-152K14.1  
Apoc3  
Gm12343  
Fah  
Asgr2  
4933440J02Rik  
Gm21814  
Olfml1  
Mir1960  
Bmf  
Lin7a  
NA  
Gm12202  
Muc3  
C4b  
Fgf16  
Nkain4  
Angptl1  
Ifi27l2a  
Ermpd4

Icam1  
Tdrp  
Pdgfrl  
Tns1  
2210407C18Rik  
NA  
1700001D01Rik  
NA  
RP23-103F2.4  
Adora2b  
Tgm1  
Gm11837  
Spns3  
Jakmip2  
NA  
Zc2hc1c  
Amer2  
Ppargc1a  
Sis  
Agr3  
Gm15611  
Nox1  
Gm29571  
Abcc2  
NA  
Gpr155  
Gm26109  
NA  
Trpm6



NA  
Greb1l  
Gm3534  
NA  
NA  
Lrp3  
Lhfpl1  
D830044D21Rik  
NA  
Sh3tc1  
NA  
RP24-227F14.4  
RP23-20I9.1  
RP23-65G17.3  
Slfn2  
Bbs9  
NA  
Rgn  
Gm26620  
NA  
Pdilt  
Gm22786  
C430002N11Rik  
Gm3629  
Creb3l3  
Adamts15  
NA  
NA  
Arhgef17

Serp2  
NA  
Tnfrsf8  
Gm8989  
NA  
Gm4117  
Stard8  
Lmo2  
Nr0b2  
mt-Ty  
Atp6v0a4  
NA  
NA  
Gm26027  
Mmp16  
Gm12224  
Slc10a2  
B230216N24Rik  
RP24-244I20.2  
Arhgef40  
NA  
NA  
Arxes2  
NA  
Apba2  
Timp1  
NA  
Gm5699  
Prokr1

Prodh2  
Fmo5  
Cyp2c70  
Nfe2  
Gm25931  
Csf1  
Dhrs9  
NA  
1700047117Rik2  
RP23-386K20.6  
B430306N03Rik  
Mir5123  
lgkc  
Gm10704  
Chrna4  
NA  
Psg25  
NA  
Vmn2r26  
Etv4  
Gm7457  
Smim1  
Btn1a1  
NA  
Gm21887  
Fam169b  
Slc9a3  
Kifc3  
Psg26

2610042L04Rik  
Cym  
Gm15270  
Gm14341  
4932435O22Rik  
NA  
Dab2  
Ugt2b36  
Mcoln3  
Clec2e  
Sult1c2  
NA  
Amph  
Ggh  
Gm6682  
NA  
Gdf11  
Pde7b  
Tlr5  
NA  
NA  
Mal  
Speer4c  
Gm25235  
NA  
2810468N07Rik  
NA  
Fam177a  
Gm10800

Pdzd2  
Zfp385b  
NA  
Prl6a1  
Apol10a  
Smlr1  
Gnb4  
NA  
Gm10406  
Ppp1r16b  
Eif3s6-ps2  
Adamts9  
Hamp2  
Plod2  
Tenm3  
NA  
Gm3005  
Gm11771  
Gja6  
Cpb2  
NA  
Slc19a3  
NA  
RP23-260J11.3  
Ppp1r1a  
NA  
RP24-252G15.5  
Pld5  
NA

Ces1g  
Cyp2c65  
Daw1  
Gm22105  
Gm10287  
Fam65c  
Lrp2  
Gm2061  
Gm26809  
Apol7b  
Ugt2b5  
Anxa9  
Gm25842  
Cpvl  
Gm12737  
Asgr1  
NA  
Gm8878  
Fam198a  
Msrb2  
Fam102b  
Gm22303  
Csgalnact1  
Rgs6  
Sox18  
Pik3c2g  
Grpr  
NA  
Grik4

Plcd3  
Far2os2  
1700018A04Rik  
Hapln1  
Mir194-1  
Rps19-ps6  
Gprasp2  
Spink3  
Cyp3a16  
NA  
NA  
Cyp2c53-ps  
Clu  
Inmt  
Gm17383  
Slc23a2  
Abca8b  
Col4a5  
Cyp2c67  
Mpped2  
NA  
D730048I06Rik  
Rerg  
Spcs2-ps  
Gm12764  
Gm3054  
Gm20706  
NA  
Cpne8

NA  
Reg3a  
Gm12408  
NA  
Clec4a1  
Slc40a1  
Daam2  
RP24-150H14.2  
NA  
Ifit1  
Mup-ps17  
Lrrc8c  
NA  
Inf2  
Ppef1  
KI  
NA  
Tex12  
RP24-17007.1  
Gm14150  
Ceacam18  
Tfr2  
NA  
Cyp2c66  
Krtap3-1  
Ugt1a9  
Retnlb  
CH25-241D1.1  
I830012O16Rik



Gm3173  
Cyp2c68  
Gbp11  
Nxpe2  
Gm23034  
Lppr1  
Mettl7a2  
4930526L06Rik  
NA  
Gm19744  
NA  
Hc  
1700064M15Rik  
NA  
Pid1  
Cxcl2  
NA  
Gm2956  
Cyp2c40  
RP23-145F12.1  
Lcn2  
A830011K09Rik  
Dact1  
Igf2bp1  
Afm  
Mfsd7c  
Adh6a  
Ptrpq  
Gm20630

Glyat  
Steap4  
Gm10801  
RP23-361M12.2  
Acot3  
Gm15895  
B3galt5  
1810065E05Rik  
Slc12a4  
1700006J14Rik  
4732463B04Rik  
1700029M03Rik  
Sntg1  
NA  
Gm10409  
Flrt2  
Acsl6  
Mgat4c  
Rpl15-ps2  
Lect2  
Al838599  
Drd3  
Aqp9  
Gpr64  
RP24-375D13.1  
Fhod3  
Rasal1  
NA  
Lmo3

NA  
SrpX2  
Cyp2c38  
Slc25a21  
Gm26671  
NA  
Gm7967  
Gpc3  
3930402G23Rik  
NA  
Gm15592  
Gm28644  
NA  
Slc30a10  
NA  
Pla2g1b  
Gm13481  
Anxa6  
Tmem26  
Gm3756  
Apol7e  
NA  
Pde10a  
Lama1  
NA  
Gm15261  
Reg3d  
NA  
Gm21857

Rasgrp3  
NA  
NA  
Tmem27  
Slc13a1  
Bcl2a1d  
NA  
Gm766  
S100g  
Col1a2  
Aspdh  
Gm26794  
Cyp2c55  
Ros1  
NA  
5830473C10Rik  
NA  
Gm20472  
Mill1  
Cfh  
Gm4477  
NA  
Cyp3a44  
NA  
Reg3b  
Reg3g  
Gm24725  
Sema3a  
NA

Kcnj3  
Pla2r1  
Gpr151  
NA  
Ugt1a8  
NA  
Cacna1e  
Pate4  
Gm3030  
Apol11b  
Ltbp1  
Ccl24  
RP24-351P4.1  
Thsd4  
Slc8a3  
NA  
Hgf  
Slc5a8  
Kcnt2  
Chil6  
Ddx4  
NA  
Prr5l  
NA  
Tenm1  
Fbxl7  
Cxcl5  
NA  
Gm21392

NA  
Reg1  
NA  
NA  
NA  
Acot5  
Trpc3  
Abcb11  
NA  
NA  
Adam5  
Caln1  
NA  
Serpina3i  
NA  
Gm4425
